# Supplementary material for: Genome-wide association analysis uncovers novel rice blast resistance alleles
Source: Research Square preprint supplement (doi:10.21203/rs.3.rs-2580055/v1), 2023-03-02
Supplement: Supplementary file 1 [file 8be10c3294b8c2fa8b8a5da3.xlsx]

## Sheet: snp3kvars-CHR12-10822534-108337
JAPONICA NIPPONBARE POSITIONS	ASSAY ID	ACCESSION	SUBPOPULATION		10607554	JAPONICA NIPPONBARE POSITIONS	ASSAY ID	ACCESSION	SUBPOPULATION	MISMATCH	10822544	10822545	10822546	1.08225e+07	1.08225e+07	1.08225e+07	10822548	10822549	10822550	10822551	10822575	1.08226e+07	1.08226e+07	1.08226e+07	1.08226e+07	10822667	1.08227e+07	10822734	10822735	10822736	10822753	1.08228e+07	10822784	1.08228e+07	10822930	10822931	10822932	10822933	10822971	10822980	10822994	10822995	10822997	10823001	10823009	10823012	10823059	1.08231e+07	1.08231e+07
JAPONICA NIPPONBARE ALLELES					A	JAPONICA NIPPONBARE ALLELES					C	T	T	-	-	-	C	C	C	T	C	-	-	-	-	C	-	G	C	T	T	-	A	-	G	G	C	T	T	C	G	T	G	G	G	G	G	-	-
MSU7 EFFECTS (cds-Non-synonymous/cds-Synonymous/Cds/3'UTR/5'UTR/Exon/splice Acceptor/splice Donor/Gene-intron/Promoter)					nonsynonymous_variant	MSU7 EFFECTS (cds-Non-synonymous/cds-Synonymous/Cds/3'UTR/5'UTR/Exon/splice Acceptor/splice Donor/Gene-intron/Promoter)					5_prime_UTR5_prime_UTR5_prime_UTR5_prime_UTR	5_prime_UTR5_prime_UTR5_prime_UTR5_prime_UTR	5_prime_UTR5_prime_UTR5_prime_UTR5_prime_UTR	5_prime_UTR5_prime_UTR5_prime_UTR5_prime_UTR	5_prime_UTR5_prime_UTR5_prime_UTR5_prime_UTR	5_prime_UTR5_prime_UTR5_prime_UTR5_prime_UTR	5_prime_UTR5_prime_UTR5_prime_UTR5_prime_UTR	5_prime_UTR5_prime_UTR5_prime_UTR5_prime_UTR	5_prime_UTR5_prime_UTR5_prime_UTR5_prime_UTR	5_prime_UTR5_prime_UTR5_prime_UTR5_prime_UTR	5_prime_UTR5_prime_UTR5_prime_UTR5_prime_UTR	5_prime_UTR5_prime_UTR5_prime_UTR5_prime_UTR	5_prime_UTR5_prime_UTR5_prime_UTR5_prime_UTR	5_prime_UTR5_prime_UTR5_prime_UTR5_prime_UTR	5_prime_UTR5_prime_UTR5_prime_UTR5_prime_UTR	5_prime_UTR5_prime_UTR5_prime_UTR5_prime_UTR	5_prime_UTR5_prime_UTR5_prime_UTR5_prime_UTR	5_prime_UTR5_prime_UTR5_prime_UTR5_prime_UTR	5_prime_UTR5_prime_UTR5_prime_UTR5_prime_UTR	5_prime_UTR5_prime_UTR5_prime_UTR5_prime_UTR	5_prime_UTR5_prime_UTR5_prime_UTR5_prime_UTR	5_prime_UTR5_prime_UTR5_prime_UTR5_prime_UTR	5_prime_UTR5_prime_UTR5_prime_UTR5_prime_UTR	5_prime_UTR5_prime_UTR5_prime_UTR5_prime_UTR	5_prime_UTR5_prime_UTR5_prime_UTR5_prime_UTR	5_prime_UTR5_prime_UTR5_prime_UTR5_prime_UTR	5_prime_UTR5_prime_UTR5_prime_UTR5_prime_UTR	5_prime_UTR5_prime_UTR5_prime_UTR5_prime_UTR	5_prime_UTR5_prime_UTR5_prime_UTRnonsynonymous_variant	5_prime_UTR5_prime_UTR5_prime_UTRnonsynonymous_variant	5_prime_UTR5_prime_UTR5_prime_UTRnonsynonymous_variant	5_prime_UTR5_prime_UTR5_prime_UTRnonsynonymous_variant	5_prime_UTR5_prime_UTR5_prime_UTRnonsynonymous_variant	5_prime_UTR5_prime_UTR5_prime_UTRnonsynonymous_variant	5_prime_UTR5_prime_UTR5_prime_UTRnonsynonymous_variant	5_prime_UTR5_prime_UTR5_prime_UTRnonsynonymous_variant	5_prime_UTR	5_prime_UTR	5_prime_UTR
	genomic sequence available					Known Katy Line	Katy PtrA																																29	38	52	53	55	59	67	70
	Nipponbare CDS coordinates						GWAS Ptr Mo15-23/24 associated accessions from 500 accessions tested (PtrB)																																10822943	10822943	10822943	10822943	10822943	10822943	10822943	10822943
	Ptr Start Site	10822943					GWAS Ptr Mo15-23/24-like based om AA pos E789K, L792Q, R793G, T846A, T847A, M851V (PtrB)																															AA pos	9.66667	12.6667	17.3333	17.6667	18.3333	19.6667	22.3333	23.3333
	Stop	10833768				IK81, M64, Mo15-125 assoc in Katy line or Mo15-23/24 gwas associated line	GWAS Ptr IK81, M64 and Mo15-125 associated accessions from 500 accessions tested (PtrC)																																Exon1	Exon1	Exon1	Exon1	Exon1	Exon1	Exon1	Exon1
							Carry 877 A-P and 879 R-K but no Katy deletion indicative of PtrC variant
Platinum' Genome Available	Carry Katy deletion
				Pita Y/N (1/0)	Functional Pita ( C )
PHOU SAO LEUM NYANG::IRGC 11570-2::[IRIS 313-10651]	IRIS 313-10651	IRGC 128134	indx	0	A	PHOU SAO LEUM NYANG::IRGC 11570-2::[IRIS 313-10651]	IRIS 313-10651	IRGC 128134	indx	61.5	C	T	T	-	-	-	C	C	C	T	C	-	-	-	-	A	A	G	C	T	T	-	A	-	G	G	C	T	T	C	G	T	G	G	G	G	T	T	-
TOC 5430::IRGC 70487-1::[IRIS 313-10054]	IRIS 313-10054	IRGC 125924	indx	1	C	TOC 5430::IRGC 70487-1::[IRIS 313-10054]	IRIS 313-10054	IRGC 125924	indx	14	C	T	T	-	-	-	C	C	C	T	C	-	-	-	-	A	A	G	C	T	T	-	A	-	G	G	C	T	T	C	G	T	G	G	G	G
DACHEONGBYEO::IRGC 72533-1::[IRIS 313-10059]	IRIS 313-10059	IRGC 125717	temp	1	C	DACHEONGBYEO::IRGC 72533-1::[IRIS 313-10059]	IRIS 313-10059	IRGC 125717	temp	21	C	T	T	-	-	-	C	C	C	T	C	-	-	-	-	A	A	G	C	T	T	-	A	-	G	G	C	T	T	C	G	T	G	G	G	G	T	T	-
CT 9506-18-7-1T-2::IRGC 116973-1::[IRIS 313-10300]	IRIS 313-10300	IRGC 125960	indx	1	C	CT 9506-18-7-1T-2::IRGC 116973-1::[IRIS 313-10300]	IRIS 313-10300	IRGC 125960	indx	22	C	T	T	-	-	-	C	C	C	T	C	-	-	-	-	A	A	G	C	T	T	-	A	-	G	G	C	T	T	C	G	T	G	G	G	G	T	T	T
O. SATIVA::IRGC 10164-2::[IRIS 313-10628]	IRIS 313-10628	IRGC 132361	ind2	1	C	O. SATIVA::IRGC 10164-2::[IRIS 313-10628]	IRIS 313-10628	IRGC 132361	ind2	29	C	T	T	-	-	-	C	C	C	T	C	-	-	-	-	A	A	G	C	T	T	-	A	-	G	G	C	T	T	C	G	T	G	G	G	G	T	T	T
ARC 12124::IRGC 21929-1::[IRIS 313-10879]	IRIS 313-10879	IRGC 127145	admix	1	C	ARC 12124::IRGC 21929-1::[IRIS 313-10879]	IRIS 313-10879	IRGC 127145	admix	21	C	T	T	-	-	-	C	C	C	T	C	-	-	-	-	A	A	G	C	T	T	-	A	-	G	G	C	T	T	C	G	T	G	G	G	G	T	T	T
ARC 12180::IRGC 21965-2::[IRIS 313-10880]	IRIS 313-10880	IRGC 127940	ind2	1	C	ARC 12180::IRGC 21965-2::[IRIS 313-10880]	IRIS 313-10880	IRGC 127940	ind2	19	C	T	T	-	-	-	C	C	C	T	C	-	-	-	-	A	A	G	C	T	T	-	A	-	G	G	C	T	T	C	G	T	G	G	G	G
ZIRA SHAHI::IRGC 28327-1::[IRIS 313-11035]	IRIS 313-11035	IRGC 128513	admix	1	C	ZIRA SHAHI::IRGC 28327-1::[IRIS 313-11035]	IRIS 313-11035	IRGC 128513	admix	21	C	T	T	-	-	-	C	C	C	T	C	-	-	-	-	A	A	G	C	T	T	-	A	-	G	G	C	T	T	C	G	T	G	G	G	G	T	T	T
YODAYA::IRGC 33901-2::[IRIS 313-11149]	IRIS 313-11149	IRGC 128204	ind3	1	C	YODAYA::IRGC 33901-2::[IRIS 313-11149]	IRIS 313-11149	IRGC 128204	ind3	21	C	T	T	-	-	-	C	C	C	T	C	-	-	-	-	C	-	G	C	T	T	-	A	-	G	G	C	T	T	C	G	T	G	G	G	G	T	T	T
ARC 14860::IRGC 41793-2::[IRIS 313-11273]	IRIS 313-11273	IRGC 127962	indx	1	C	ARC 14860::IRGC 41793-2::[IRIS 313-11273]	IRIS 313-11273	IRGC 127962	indx	37	C	T	T	-	-	-	C	C	C	T	C	-	-	-	-	A	A	G	C	T	T	-	A	-	G	G	C	T	T	C	G	T	G	G	G	G	T	T	T
ARC 15505::IRGC 42066-1::[IRIS 313-11281]	IRIS 313-11281	IRGC 131967	ind1A	1	C	ARC 15505::IRGC 42066-1::[IRIS 313-11281]	IRIS 313-11281	IRGC 131967	ind1A	21	C	T	T	-	-	-	C	C	C	T	C	-	-	-	-	A	A	G	C	T	T	-	A	-	G	G	C	T	T	C	G	T	G	G	G	G	T	T	T
ITA 245::IRGC 66288-1::[IRIS 313-11713]	IRIS 313-11713	IRGC 127445	ind3	1	C	ITA 245::IRGC 66288-1::[IRIS 313-11713]	IRIS 313-11713	IRGC 127445	ind3	10	C	T	T	-	-	-	C	C	C	T	C	-	-	-	-	A	A	G	C	T	T	-	A	-	G	G	C	T	T	C	G	T	G	G	G	G	T	T	T
KATUMANI::IRGC 69695-1::[IRIS 313-11779]	IRIS 313-11779	IRGC 127500	ind3	1	C	KATUMANI::IRGC 69695-1::[IRIS 313-11779]	IRIS 313-11779	IRGC 127500	ind3	17	C	T	T	-	-	-	C	C	C	T	C	-	-	-	-	A	A	G	C	T	T	-	A	-	G	G	C	T	T	C	G	T	G	G	G	G	T	T	T
MAMA TABALI::IRGC 69720-1::[IRIS 313-11783]	IRIS 313-11783	IRGC 132015	indx	1	C	MAMA TABALI::IRGC 69720-1::[IRIS 313-11783]	IRIS 313-11783	IRGC 132015	indx	21	C	T	T	-	-	-	C	C	C	T	C	-	-	-	-	A	A	G	C	T	T	-	A	-	G	G	C	T	T	C	G	T	G	G	G	G	T	T	T
MBEIMBEIHUN::IRGC 69730-1::[IRIS 313-11784]	IRIS 313-11784	IRGC 127619	ind1B	1	C	MBEIMBEIHUN::IRGC 69730-1::[IRIS 313-11784]	IRIS 313-11784	IRGC 127619	ind1B	29	C	T	T	-	-	-	C	C	C	T	C	-	-	-	-	A	A	G	C	T	T	-	A	-	G	G	C	T	T	C	G	T	G	G	G	G	T	T	T
E ZI 110::IRGC 70201-1::[IRIS 313-11799]	IRIS 313-11799	IRGC 127366	ind1A	1	C	E ZI 110::IRGC 70201-1::[IRIS 313-11799]	IRIS 313-11799	IRGC 127366	ind1A	37	C	T	T	-	-	-	C	C	C	T	C	-	-	-	-	A	A	G	C	T	T	-	A	-	G	G	C	T	T	C	G	T	G	G	G	G	T	T	T
R 582::IRGC 70504-1::[IRIS 313-11807]	IRIS 313-11807	IRGC 127757	indx	1	C	R 582::IRGC 70504-1::[IRIS 313-11807]	IRIS 313-11807	IRGC 127757	indx	29	C	T	T	-	-	-	C	C	C	T	C	-	-	-	-	A	A	G	C	T	T	-	A	-	G	G	C	T	T	C	G	T	G	G	G	G	T	T	T
R 762::IRGC 70531-1::[IRIS 313-11808]	IRIS 313-11808	IRGC 128444	indx	1	C	R 762::IRGC 70531-1::[IRIS 313-11808]	IRIS 313-11808	IRGC 128444	indx	12	C	T	T	-	-	-	C	C	C	T	C	-	-	-	-	A	A	G	C	T	T	-	A	-	G	G	C	T	T	C	G	T	G	G	G	G	G	-	-
KIKUBA::IRGC 70722-1::[IRIS 313-11814]	IRIS 313-11814	IRGC 127523	ind3	1	C	KIKUBA::IRGC 70722-1::[IRIS 313-11814]	IRIS 313-11814	IRGC 127523	ind3	29	C	T	T	-	-	-	C	C	C	T	C	-	-	-	-	A	A	G	C	T	T	-	A	-	G	G	C	T	T	C	G	T	G	G	G	G	T	T	T
LEUM DERN::IRGC 71288-1::[IRIS 313-11838]	IRIS 313-11838	IRGC 132389	ind3	1	C	LEUM DERN::IRGC 71288-1::[IRIS 313-11838]	IRIS 313-11838	IRGC 132389	ind3	10	C	T	T	-	-	-	C	C	C	T	C	-	-	-	-	A	A	G	C	T	T	-	A	-	G	G	C	T	T	C	G	T	G	G	G	G	G	-	-
BA TUC RAN::IRGC 73239-1::[IRIS 313-11895]	IRIS 313-11895	IRGC 132391	ind3	1	C	BA TUC RAN::IRGC 73239-1::[IRIS 313-11895]	IRIS 313-11895	IRGC 132391	ind3	21	C	T	T	-	-	-	C	C	C	T	C	-	-	-	-	A	A	G	C	T	T	-	A	-	G	G	C	T	T	C	G	T	G	G	G	G	T	T	T
EX AUBERGE::IRGC 79898-1::[IRIS 313-12016]	IRIS 313-12016	IRGC 135751	indx	1	C	EX AUBERGE::IRGC 79898-1::[IRIS 313-12016]	IRIS 313-12016	IRGC 135751	indx	15	C	T	T	-	-	-	C	C	C	T	C	-	-	-	-	A	A	G	C	T	T	-	A	-	G	G	C	T	T	C	G	T	G	G	G	G	G	-	-
SHWEWARHNAN::IRGC 96053-1::[IRIS 313-12269]	IRIS 313-12269	IRGC 127802	indx	1	C	SHWEWARHNAN::IRGC 96053-1::[IRIS 313-12269]	IRIS 313-12269	IRGC 127802	indx	18	C	T	T	-	-	-	C	C	C	T	C	-	-	-	-	C	-	G	C	T	T	-	A	-	G	G	C	T	T	C	G	T	G	G	G	G	G	-	-
AIJIAONANTE::IRGC 96974-1::[IRIS 313-12273]	IRIS 313-12273	IRGC 127115	ind1A	1	C	AIJIAONANTE::IRGC 96974-1::[IRIS 313-12273]	IRIS 313-12273	IRGC 127115	ind1A	14	C	T	T	-	-	-	C	C	C	T	C	-	-	-	-	A	A	G	C	T	T	-	A	-	G	G	C	T	T	C	G	T	G	G	G	G	G	-	-
WAS 33-B-B-15-1-4-5::C1::[IRIS 313-7826]	IRIS 313-7826	IRGC 122292	ind1B	1	C	WAS 33-B-B-15-1-4-5::C1::[IRIS 313-7826]	IRIS 313-7826	IRGC 122292	ind1B	19	C	T	T	-	-	-	C	C	C	T	C	-	-	-	-	C	-	G	C	T	T	-	A	-	G	G	C	T	T	C	G	T	G	G	G	G	T	T	T
BAIANG 6::IRGC 6129-1::[IRIS 313-8846]	IRIS 313-8846	IRGC 125668	indx	1	C	BAIANG 6::IRGC 6129-1::[IRIS 313-8846]	IRIS 313-8846	IRGC 125668	indx	26	C	T	T	-	-	-	C	C	C	T	C	-	-	-	-	C	-	G	C	T	T	-	A	-	G	G	C	T	T	C	G	T	G	G	G	G	T	T	T
MUTA GANJE::IRGC 26744-1::[IRIS 313-9072]	IRIS 313-9072	IRGC 125847	ind2	1	C	MUTA GANJE::IRGC 26744-1::[IRIS 313-9072]	IRIS 313-9072	IRGC 125847	ind2	13	C	T	T	-	-	-	C	C	C	T	C	-	-	-	-	C	-	G	C	T	T	-	A	-	G	G	C	T	T	C	G	T	G	G	G	G	G	-	-
KHAO LEUANG RAI::IRGC 48168-1::[IRIS 313-9121]	IRIS 313-9121	IRGC 125802	ind2	1	C	KHAO LEUANG RAI::IRGC 48168-1::[IRIS 313-9121]	IRIS 313-9121	IRGC 125802	ind2	29	C	T	T	-	-	-	C	C	C	T	C	-	-	-	-	A	A	G	C	T	T	-	A	-	G	G	C	T	T	C	G	T	G	G	G	G	T	T	T
GOJOL GORIA::IRGC 26629-1::[IRIS 313-9139]	IRIS 313-9139	IRGC 125754	ind2	1	C	GOJOL GORIA::IRGC 26629-1::[IRIS 313-9139]	IRIS 313-9139	IRGC 125754	ind2	17	C	T	T	-	-	-	C	C	C	T	C	-	-	-	-	A	A	G	C	T	T	-	A	-	G	G	C	T	T	C	G	T	G	G	G	G	G	-	-
LEAD::IRGC 5805-1::[IRIS 313-9791]	IRIS 313-9791	IRGC 125821	indx	1	C	LEAD::IRGC 5805-1::[IRIS 313-9791]	IRIS 313-9791	IRGC 125821	indx	22	C	T	T	-	-	-	C	C	C	T	C	-	-	-	-	C	-	G	C	T	T	-	A	-	G	G	C	T	T	C	G	T	G	G	G	G	T	T	T
RADIN PAHANG::IRGC 14487-1::[IRIS 313-8316]	IRIS 313-8316	IRGC 131948	ind3	1	C	RADIN PAHANG::IRGC 14487-1::[IRIS 313-8316]	IRIS 313-8316	IRGC 131948	ind3	21	C	T	T	-	-	-	C	C	C	T	C	-	-	-	-	A	A	G	C	T	T	-	A	-	G	G	C	T	T	C	G	T	G	G	G	G	T	T	T
SLO 19::IRGC 35157-1::[IRIS 313-11174]	IRIS 313-11174	IRGC 127817	aus	0	A	SLO 19::IRGC 35157-1::[IRIS 313-11174]	IRIS 313-11174	IRGC 127817	aus	30	C	T	T	-	-	-	C	C	C	T						C	-	G	C	T			A	-						C				G	A	A	G	-	-
ARC 13515::IRGC 41134-2::[IRIS 313-11259]	IRIS 313-11259	IRGC 127949	aro	0	A	ARC 13515::IRGC 41134-2::[IRIS 313-11259]	IRIS 313-11259	IRGC 127949	aro	23	C	T	T	-	-	-	C	C	C	T	C	-	-	-	-	C	-								G	G	C	T	C	C				G
EX FOILAEIN (NAPUTO)::IRGC 81675-1::[IRIS 313-10113]	IRIS 313-10113	IRGC 125736	indx	0	A	EX FOILAEIN (NAPUTO)::IRGC 81675-1::[IRIS 313-10113]	IRIS 313-10113	IRGC 125736	indx	72	C	T	T	-	-	-	C	C	C	T						C	-	G	C	T			A	-	G	G	C	T	C	C							G	-	-
PIN GAEW 56::IRGC 7887-1::[IRIS 313-10134]	IRIS 313-10134	IRGC 125871	ind3	0	A	PIN GAEW 56::IRGC 7887-1::[IRIS 313-10134]	IRIS 313-10134	IRGC 125871	ind3	105.5	C	T	T	-	-	-	C	C	C	T	T	T	A	G	A	A	A	G	C	T	T	-	A	-	G	G	C	T	C	C	A	C	A	G	A	A	G	-	-
AMISTAD 82::IRGC 116954-1::[IRIS 313-10247]	IRIS 313-10247	IRGC 125949	ind1B	0	A	AMISTAD 82::IRGC 116954-1::[IRIS 313-10247]	IRIS 313-10247	IRGC 125949	ind1B	66											C	-	-	-	-	C	-	G	C	T			A	-	G	G	C	T	C	C	A	C	A	G	A	A	G	-	-
JUMA 62::IRGC 117011-1::[IRIS 313-10279]	IRIS 313-10279	IRGC 126066	indx	0	A	JUMA 62::IRGC 117011-1::[IRIS 313-10279]	IRIS 313-10279	IRGC 126066	indx	77											C	-	-	-	-	C	-	G	C	T	T	-	C	C	G	G	C	T	C	C	A	C	A	G	A	A	G	-	-
ECIA 24-107-1::IRGC 116978-1::[IRIS 313-10293]	IRIS 313-10293	IRGC 125962	ind1B	0	A	ECIA 24-107-1::IRGC 116978-1::[IRIS 313-10293]	IRIS 313-10293	IRGC 125962	ind1B	87	C	T	T	-	-	-	C	C	C	T	C	-	-	-	-	C	-	G	C	T	T	-	A	-	G	G	C	T	C	C	A	C	A	G	A	A
INIAP 6::IRGC 117002-1::[IRIS 313-10307]	IRIS 313-10307	IRGC 127050	indx	0	A	INIAP 6::IRGC 117002-1::[IRIS 313-10307]	IRIS 313-10307	IRGC 127050	indx	98	C	T	T	-	-	-	C	C	C	T	C	-	-	-	-	A	A	G	C	T	T	-	A	-	G	G	C	T	C	C	A	C	A	G	A	A	G	-	-
RUSTIC::IRGC 117026-1::[IRIS 313-10318]	IRIS 313-10318	IRGC 126085	indx	0	A	RUSTIC::IRGC 117026-1::[IRIS 313-10318]	IRIS 313-10318	IRGC 126085	indx	67	C	T	T	-	-	-	C	C	C	T	C	-	-	-	-	C	-	G	C	T	T	-	A	-	G	G	C	T	C	C				G			G	-	-
IRGA 346-111-2-1F::IRGC 117341-1::[IRIS 313-10399]	IRIS 313-10399	IRGC 120992	indx	0	A	IRGA 346-111-2-1F::IRGC 117341-1::[IRIS 313-10399]	IRIS 313-10399	IRGC 120992	indx	59	C	T	T	-	-	-	C	C	C	T						C	-	G	C	T	T	-	A	-					C	C	A	C	A	G	A	A	G	-	-
ZACATEPEC::IRGC 16901-2::[IRIS 313-10753]	IRIS 313-10753	IRGC 128205	ind1B	0	A	ZACATEPEC::IRGC 16901-2::[IRIS 313-10753]	IRIS 313-10753	IRGC 128205	ind1B	93	C	T	T	-	-	-	C	C	C	T	C	-	-	-	-	C	-	G	C	T	T	-	A	-	G	G	C	T	C	C	A	C	A	G	A	A	G	-	-
ARC 11276::IRGC 21278-1::[IRIS 313-10861]	IRIS 313-10861	IRGC 127134	aus	0	A	ARC 11276::IRGC 21278-1::[IRIS 313-10861]	IRIS 313-10861	IRGC 127134	aus	123	C	T	T	-	-	-	C	C	C	T	C	-	-	-	-	A	A	G	C	T	T	-	A	-	G	G	C	T	C	C	A	C	A	G	A	A	G	-	-
JENDA ABANG::IRGC 25413-2::[IRIS 313-10951]	IRIS 313-10951	IRGC 128062	ind3	0	A	JENDA ABANG::IRGC 25413-2::[IRIS 313-10951]	IRIS 313-10951	IRGC 128062	ind3	84	C	T	T	-	-	-	C	C	C	T	C	-	-	-	-	C	-	G	C	T	T	-	A	-	G	G	C	T	C	C	A	C	A	G	A	A	G	-	-
AUS 219::IRGC 29031-1::[IRIS 313-11049]	IRIS 313-11049	IRGC 127179	aus	0	A	AUS 219::IRGC 29031-1::[IRIS 313-11049]	IRIS 313-11049	IRGC 127179	aus	104	C	T	T	-	-	-	C	C	C	T	C	-	-	-	-	A	A	G	C	T	T	-	A	-	G	G	C	T	C	C	A	C	A	G	A	A	G	-	-
LAI NOK KHA::IRGC 29604-2::[IRIS 313-11076]	IRIS 313-11076	IRGC 128094	ind3	0	A	LAI NOK KHA::IRGC 29604-2::[IRIS 313-11076]	IRIS 313-11076	IRGC 128094	ind3	104	C	T	T	-	-	-	C	C	C	T	C	-	-	-	-	A	A	G	C	T	T	-	A	-	G	G	C	T	C	C	A	C	A	G	A
SABRAN::IRGC 34630-1::[IRIS 313-11162]	IRIS 313-11162	IRGC 127775	ind1B	0	A	SABRAN::IRGC 34630-1::[IRIS 313-11162]	IRIS 313-11162	IRGC 127775	ind1B	58	C	T	T	-	-	-	C	C	C	T	C	-	-	-	-	C	-	G	C	T	T	-	A	-	G	G	C	T	C	C	A	C	A	G	A	A	G	-	-
BR 52-87-1::IRGC 36849-2::[IRIS 313-11200]	IRIS 313-11200	IRGC 128002	ind1B	0	A	BR 52-87-1::IRGC 36849-2::[IRIS 313-11200]	IRIS 313-11200	IRGC 128002	ind1B	64.5											C	-	-	-	-	C	-	G	C	T	T	-	A	-	G	G	C	T	C	C	A	C	A	G	A	A	G	-	-
ARC 14663::IRGC 41671-2::[IRIS 313-11270]	IRIS 313-11270	IRGC 127959	aro	0	A	ARC 14663::IRGC 41671-2::[IRIS 313-11270]	IRIS 313-11270	IRGC 127959	aro	87	C	T	T	-	-	-	C	C	C	T	C	-	-	-	-	C	-	G	C	T	T	-	A	-	G	G	C	T	C	C	A	C	A	G	A	A	G	-	-
ZACATEPEC A 79::IRGC 51116-1::[IRIS 313-11438]	IRIS 313-11438	IRGC 127909	indx	0	A	ZACATEPEC A 79::IRGC 51116-1::[IRIS 313-11438]	IRIS 313-11438	IRGC 127909	indx	63.5	C	T	T	-	-	-	C	C	C	T	C	-	-	-	-	C	-						A	-	G	G	C	T		C							G	-	-
A 69-1::IRGC 55305-1::[IRIS 313-11510]	IRIS 313-11510	IRGC 127102	indx	0	A	A 69-1::IRGC 55305-1::[IRIS 313-11510]	IRIS 313-11510	IRGC 127102	indx	102	C	T	T	-	-	-	C	C	C	T	C	-	-	-	-	C	-	G	C	T	T	-	A	-	G	G	C	T	C	C	A	C	A	G	G/A	G/A	G	-	-
J 6 IR 520 (WC 693)::IRGC 57600-1::[IRIS 313-11538]	IRIS 313-11538	IRGC 127447	ind1B	0	A	J 6 IR 520 (WC 693)::IRGC 57600-1::[IRIS 313-11538]	IRIS 313-11538	IRGC 127447	ind1B	80	C	T	T	-	-	-	C	C	C	T	C	-	-	-	-	A	A	G	C	T	T	-			G	G	C	T	C	C	A	C	A	G	A	A	G	-	-
AMAKOYALI::IRGC 60878-1::[IRIS 313-11595]	IRIS 313-11595	IRGC 128213	aus	0	A	AMAKOYALI::IRGC 60878-1::[IRIS 313-11595]	IRIS 313-11595	IRGC 128213	aus	43	C	T	T	-	-	-	C	C	C	T	C	-	-	-	-	C	-	G	C	T	T	-			G	G	C	T		C				G
SOSSOKA::IRGC 66478-1::[IRIS 313-11716]	IRIS 313-11716	IRGC 127822	ind3	0	A	SOSSOKA::IRGC 66478-1::[IRIS 313-11716]	IRIS 313-11716	IRGC 127822	ind3	133	C	T	T	-	-	-	C	C	C	T	T	T	A	G	A	A	A	G	C	T	C	C	A	-	G	G	C	T	C	C	A	C	A	G	A	A	G	-	-
JATI MANI::IRGC 66565-1::[IRIS 313-11717]	IRIS 313-11717	IRGC 127450	indx	0	A	JATI MANI::IRGC 66565-1::[IRIS 313-11717]	IRIS 313-11717	IRGC 127450	indx	152	C	T	C	C	C	C	C	C	C	T	T	T	A	G	A	A	A	G	C	T	T	-	C	C	G	G	C	T	C	C	A	C	A	G	A	A	G	-	-
PJ 110::IRGC 68981-1::[IRIS 313-11763]	IRIS 313-11763	IRGC 127734	indx	0	A	PJ 110::IRGC 68981-1::[IRIS 313-11763]	IRIS 313-11763	IRGC 127734	indx	138.5	C	T	T	-	-	-	C	C	C	T	C	-	-	-	-	A	A	G	C	T	C	C	C	C	G	G	C	T	C	C	A	C	A	G	A	A	G	-	-
KILOMBERO::IRGC 69698-1::[IRIS 313-11780]	IRIS 313-11780	IRGC 127524	ind3	0	A	KILOMBERO::IRGC 69698-1::[IRIS 313-11780]	IRIS 313-11780	IRGC 127524	ind3	89	C	T	T	-	-	-	C	C	C	T	C	-	-	-	-	C	-	G	C	T	T	-	A	-	G	G	C	T	C	C	A	C	A	G	A	A	G	-	-
MOSHI::IRGC 69737-1::[IRIS 313-11785]	IRIS 313-11785	IRGC 127631	ind3	0	A	MOSHI::IRGC 69737-1::[IRIS 313-11785]	IRIS 313-11785	IRGC 127631	ind3	63											C	-	-	-	-	C	-								G	G	C	T	C	C				G			G	-	-
TANDAKAY FINGO::IRGC 69793-1::[IRIS 313-11787]	IRIS 313-11787	IRGC 127845	ind2	0	A	TANDAKAY FINGO::IRGC 69793-1::[IRIS 313-11787]	IRIS 313-11787	IRGC 127845	ind2	118	C	T	T	-	-	-	C	C	C	T	C	-	-	-	-	A	A	G	C	T	T	-	A	-	G	G	C	T	C	C	A	C	A	G	A	A	G	-	-
E ZI 32::IRGC 70127-1::[IRIS 313-11797]	IRIS 313-11797	IRGC 128289	ind1A	0	A	E ZI 32::IRGC 70127-1::[IRIS 313-11797]	IRIS 313-11797	IRGC 128289	ind1A	150	C	T	T	-	-	-	C	C	C	T	T	T	A	G	A	A	A	G	C	T	T	-	C	C	G	G	C	T	C	C	A	C	A	G	A	A	G	-	-
MHARAKA::IRGC 70612-1::[IRIS 313-11809]	IRIS 313-11809	IRGC 128387	aus	0	A	MHARAKA::IRGC 70612-1::[IRIS 313-11809]	IRIS 313-11809	IRGC 128387	aus	153.5	C	T	C	C	C	C	C	C	C	T	T	T	A	G	A	A	A	G	C	T	C	C	C	C	G	G	C	T	C	C	A	C	A	G	A	A	G	-	-
PAKISTANHMWE::IRGC 70763-1::[IRIS 313-11820]	IRIS 313-11820	IRGC 127709	ind3	0	A	PAKISTANHMWE::IRGC 70763-1::[IRIS 313-11820]	IRIS 313-11820	IRGC 127709	ind3	143	C	T	C	C	C	C	C	C	C	T	T	T	A	G	A	A	A	G	C	T	T	-	C	C	G	G	C	T	C	C	A	C	A	G	A	A	G	-	-
NKUMBAN NDINGO::IRGC 77718-1::[IRIS 313-11974]	IRIS 313-11974	IRGC 135575	ind3	0	A	NKUMBAN NDINGO::IRGC 77718-1::[IRIS 313-11974]	IRIS 313-11974	IRGC 135575	ind3	79	C	T	T	-	-	-	C	C	C	T	C	-	-	-	-	A	A	G	C	T	T	-	A	-	G	G	C	T	C	C				G	A	A	G	-	-
NOU::IRGC 81352-1::[IRIS 313-12041]	IRIS 313-12041	IRGC 132413	ind3	0	A	NOU::IRGC 81352-1::[IRIS 313-12041]	IRIS 313-12041	IRGC 132413	ind3	99	C	T	T	-	-	-	C	C	C	T	T	T	A	G	A	A	A	G	C	T	C	C	A	-	G	G	C	T	C	C	A	C	A	G	A	A	G	-	-
INPONG::IRGC 85524-1::[IRIS 313-12127]	IRIS 313-12127	IRGC 127431	ind3	0	A	INPONG::IRGC 85524-1::[IRIS 313-12127]	IRIS 313-12127	IRGC 127431	ind3	126	C	T	T	-	-	-	C	C	C	T	T	T	A	G	A	C	-	G	C	T	T	-	A	-	G	G	C	T	C	C	A	C	A	G	A	A	G	-	-
PA LAT NGAN::IRGC 91983-1::[IRIS 313-12225]	IRIS 313-12225	IRGC 127711	ind3	0	A	PA LAT NGAN::IRGC 91983-1::[IRIS 313-12225]	IRIS 313-12225	IRGC 127711	ind3	83	C	T	T	-	-	-	C	C	C	T	C	-	-	-	-	C	-	G	C	T	C	C	A	-	G	G	C	T	C	C	A	C	A	G	A	A	G	-	-
COLOMBIA XXI::G1::[IRIS 313-15908]	IRIS 313-15908	IRGC 126955	aus	0	A	COLOMBIA XXI::G1::[IRIS 313-15908]	IRIS 313-15908	IRGC 126955	aus	149	C	T	T	-	-	-	C	C	C	T	T	T	A	G	A	A	A	G	C	T	T	-	A	-	G	G	C	T	C	C	A	C	A	G	A	A	G	-	-
BOUAKE 189::C1::[IRIS 313-7654]	IRIS 313-7654	IRGC 126997	ind1B	0	A	BOUAKE 189::C1::[IRIS 313-7654]	IRIS 313-7654	IRGC 126997	ind1B	65	C	T	T	-	-	-	C	C	C	T	C	-	-	-	-	C	-	G	C	T	T	-	A	-	G	G	C	T	C	C	A	C	A	G	A	A	G	-	-
IR 22::IRGC 11356-C1::[IRIS 313-7688]	IRIS 313-7688	IRGC 122091	ind1B	0	A	IR 22::IRGC 11356-C1::[IRIS 313-7688]	IRIS 313-7688	IRGC 122091	ind1B	94	C	T	T	-	-	-	C	C	C	T	T	T	A	G	A	A	A	G	C	T	C	C	C	C	G	G	C	T	C	C	A	C	A	G	A	A	G	-	-
WAS 198-B-3-1-3::C1::[IRIS 313-7815]	IRIS 313-7815	IRGC 122287	ind1B	0	A	WAS 198-B-3-1-3::C1::[IRIS 313-7815]	IRIS 313-7815	IRGC 122287	ind1B	83	C	T	T	-	-	-	C	C	C	T	C	-	-	-	-	A	A	G	C	T	T	-	A	-	G	G	C	T	C	C	A	C	A	G	A	A	G	-	-
WAS 206-B-B-2-2-1::C1::[IRIS 313-7820]	IRIS 313-7820	IRGC 122290	ind1B	0	A	WAS 206-B-B-2-2-1::C1::[IRIS 313-7820]	IRIS 313-7820	IRGC 122290	ind1B	95	C	T	T	-	-	-	C	C	C	T	C	-	-	-	-	C	-	G	C	T	T	-	C	C	G	G	C	T	C	C	A	C	A	G	A	A	G	-	-
IR 72967-12-2-3::C1::[IRIS 313-7911]	IRIS 313-7911	IRGC 122111	ind1B	0	A	IR 72967-12-2-3::C1::[IRIS 313-7911]	IRIS 313-7911	IRGC 122111	ind1B	102	C	T					C	C	C	T	T	T	A	G	A	A	A	G	C	T	T	-	C	C	G	G	C	T	C	C	A	C	A	G	A	A	G	-	-
ARC 11959::IRGC 21780-1::[IRIS 313-8554]	IRIS 313-8554	IRGC 121188	aus	0	A	ARC 11959::IRGC 21780-1::[IRIS 313-8554]	IRIS 313-8554	IRGC 121188	aus	131	C	T	C	C	C	C	C	C	C	T	C	-	-	-	-	A	A	G	C	T	T	-	A	-	G	G	C	T	C	C	A	C	A	G	A	A	G	-	-
ES 21::IRGC 56171-1::[IRIS 313-8571]	IRIS 313-8571	IRGC 126204	ind3	0	A	ES 21::IRGC 56171-1::[IRIS 313-8571]	IRIS 313-8571	IRGC 126204	ind3	104	C	T	T	-	-	-	C	C	C	T	C	-	-	-	-	C	-	G	C	T	T	-	A	-	G	G	C	T	C	C	A	C	A	G	A	A	G	-	-
BANIKAT::IRGC 67720-1::[IRIS 313-8988]	IRIS 313-8988	IRGC 125672	ind2	0	A	BANIKAT::IRGC 67720-1::[IRIS 313-8988]	IRIS 313-8988	IRGC 125672	ind2	122	C	T	T	-	-	-	C	C	C	T	C	-	-	-	-	A	A	G	C	T	T	-	C	C	G	G	C	T	C	C	A	C	A	G	A	A	G	-	-
ARC 10100::IRGC 20709-1::[IRIS 313-9137]	IRIS 313-9137	IRGC 121185	aus	0		ARC 10100::IRGC 20709-1::[IRIS 313-9137]	IRIS 313-9137	IRGC 121185	aus	58	C	T	T	-	-	-	C	C	C	T	C	-	-	-	-	C	-	G	C	T	T	-	A	-	G	G	C	T	T	C	G	T	G	G	G/A	G/A	G	-	-
ARC 7229::IRGC 12331-1::[IRIS 313-9172]	IRIS 313-9172	IRGC 126177	aro	0	A	ARC 7229::IRGC 12331-1::[IRIS 313-9172]	IRIS 313-9172	IRGC 126177	aro	85.5	C	T	T	-	-	-	C	C	C	T	C	-	-	-	-	C	-	G	C	T	T	-	A	-	G	G	C	T	C	C	A	C	A	G			G	-	-
TAK SUFAID::IRGC 73127-1::[IRIS 313-9283]	IRIS 313-9283	IRGC 121134	aus	0	A	TAK SUFAID::IRGC 73127-1::[IRIS 313-9283]	IRIS 313-9283	IRGC 121134	aus	82	C	T	T	-	-	-	C	C	C	T	C	-	-	-	-	A	A	G	C	T	T	-			G	G	C	T	C	C				G			G	-	-
BEGUM::IRGC 33990-1::[IRIS 313-9641]	IRIS 313-9641	IRGC 125602	aus	0	A	BEGUM::IRGC 33990-1::[IRIS 313-9641]	IRIS 313-9641	IRGC 125602	aus	42	C	T	T	-	-	-	C	C	C	T	C	-	-	-	-	C	-	G	C	T													A	G	A	A	G	-	-
PREAH SIHANOUK::IRGC 11328-2::[IRIS 313-10648]	IRIS 313-10648	IRGC 132364	ind3	0	A	PREAH SIHANOUK::IRGC 11328-2::[IRIS 313-10648]	IRIS 313-10648	IRGC 132364	ind3	48	C	T	T	-	-	-	C	C	C	T	C	-	-	-	-	C	-	G	C	T	T	-	A	-	G	G	C	T	T	C	G	T	G	G	G	G	G	-	-
CHAO KHAW NYAO::IRGC 89460-1::[IRIS 313-12190]	IRIS 313-12190	IRGC 131975	indx	0	A	CHAO KHAW NYAO::IRGC 89460-1::[IRIS 313-12190]	IRIS 313-12190	IRGC 131975	indx	60.5	C	T	T	-	-	-	C	C	C	T	C	-	-	-	-	A	A	G	C	T	T	-	A	-	G	G	C	T	T	C	G	T	G	G	G	G	G	-	-
SABALINE::IRGC 98059-1::[IRIS 313-12296]	IRIS 313-12296	IRGC 127773	ind3	0	A	SABALINE::IRGC 98059-1::[IRIS 313-12296]	IRIS 313-12296	IRGC 127773	ind3	93	C	T	T	-	-	-	C	C	C	T	C	-	-	-	-	A	A	G	C	T			A	-	G	G	C	T	C	C	A	C	A	G	A	A	G	-	-
ARC 10497::[IRIS 313-8813]	IRIS 313-8813	IRGC 117425	aro	0	A	ARC 10497::[IRIS 313-8813]	IRIS 313-8813	IRGC 117425	aro	110	C	T	T	-	-	-	C	C	C	T	C	-	-	-	-	A	A								G	G	C	T	C	C	A	C	A	G	A	A	G	-	-
INIAP 10::IRGC 117000-1::[IRIS 313-10314]	IRIS 313-10314	IRGC 125969	indx	0	A	INIAP 10::IRGC 117000-1::[IRIS 313-10314]	IRIS 313-10314	IRGC 125969	indx	92	C	T	T	-	-	-	C	C	C	T	C	-	-	-	-	C	-	G	C	T	T	-	A	-	G	G	C	T	C	C	A	C	A	G	A	A	G	-	-
ARC 13829::[IRIS 313-8712]	IRIS 313-8712	IRGC 117426	aro	0	A	ARC 13829::[IRIS 313-8712]	IRIS 313-8712	IRGC 117426	aro	108	C	T	T	-	-	-	C	C	C	T	C	-	-	-	-	C	-	G	C	T					G	G	C	T	C	C	A	C	A	G	A	A	G	-	-
ARC 14654::IRGC 41663-1::[IRIS 313-8900]	IRIS 313-8900	IRGC 125650	ind2	1	C	ARC 14654::IRGC 41663-1::[IRIS 313-8900]	IRIS 313-8900	IRGC 125650	ind2	60	C	T	T	-	-	-	C	C	C	T	C	-	-	-	-	C	-						A	-	G	G	C	T	C	C	A	C	A	G	A	A	G	-	-
ARC 18434::IRGC 42429-2::[IRIS 313-11288]	IRIS 313-11288	IRGC 127970	indx	0	A	ARC 18434::IRGC 42429-2::[IRIS 313-11288]	IRIS 313-11288	IRGC 127970	indx	79	C	T	T	-	-	-	C	C	C	T	C	-	-	-	-	A	A								G	G	C	T	C	C	A	C	A	G	A	A	G	-	-
CHHOTI MASHINO::IRGC 67830-1::[IRIS 313-11743]	IRIS 313-11743	IRGC 127272	aro	0	A	CHHOTI MASHINO::IRGC 67830-1::[IRIS 313-11743]	IRIS 313-11743	IRGC 127272	aro	72	C	T	T	-	-	-	C	C	C	T	C	-	-	-	-	C	-	G	C	T	T	-	A	-	G	G	C	T	C	C							G	-	-
SHANKA::IRGC 67848-1::[IRIS 313-8814]	IRIS 313-8814	IRGC 121499	aro	0	A	SHANKA::IRGC 67848-1::[IRIS 313-8814]	IRIS 313-8814	IRGC 121499	aro	59	C	T	T	-	-	-	C	C	C	T	C	-	-	-	-	C	-	G	C	T			A	-	G	G	C	T	C	C	A	C	A	G	A	A	G	-	-
ANDEL WELUT::IRGC 16339-1::[IRIS 313-10738]	IRIS 313-10738	IRGC 131965	admix	0	A	ANDEL WELUT::IRGC 16339-1::[IRIS 313-10738]	IRIS 313-10738	IRGC 131965	admix	71	C	T	T	-	-	-	C	C	C	T	C	-	-	-	-	C	-	G	C	T	T	-	A	-	G	G	C	T	C	C	A	C	A	G	A	A	G	-	-
BAKASI::IRGC 27074-1::[IRIS 313-10996]	IRIS 313-10996	IRGC 127204	indx	0	A	BAKASI::IRGC 27074-1::[IRIS 313-10996]	IRIS 313-10996	IRGC 127204	indx	62.5	C	T	T	-	-	-	C	C	C	T	C	-	-	-	-			G	C	T	T	-	A	-	G	G	C	T	C	C				G	A	A	G	-	-
TAICHUNG SEN YU 214::IRGC 38899-1::[IRIS 313-11237]	IRIS 313-11237	IRGC 127835	ind1B	0	A	TAICHUNG SEN YU 214::IRGC 38899-1::[IRIS 313-11237]	IRIS 313-11237	IRGC 127835	ind1B	56	C	T	T	-	-	-	C	C	C	T	C	-	-	-	-	A	A	G	C	T	T	-	A	-	G	G	C	T	C	C				G			G	-	-
SUFAID 246::IRGC 28303-1::[IRIS 313-8390]	IRIS 313-8390	IRGC 121128	aus	0	A	SUFAID 246::IRGC 28303-1::[IRIS 313-8390]	IRIS 313-8390	IRGC 121128	aus	75	C	T	T	-	-	-	C	C	C	T	C	-	-	-	-	C	-	G	C	T	T	-			G	G	C	T	C	C				G			G	-	-
ARC 10145::IRGC 20744-1::[IRIS 313-10854]	IRIS 313-10854	IRGC 127127	aus	0	A	ARC 10145::IRGC 20744-1::[IRIS 313-10854]	IRIS 313-10854	IRGC 127127	aus	83	C	T	T	-	-	-	C	C	C	T	C	-	-	-	-	C	-	G	C	T	T	-			G	G	C	T	C	C				G			G	-	-
BPI 76 NON SENSITIVE (GREEN)::IRGC 9790-1::[IRIS 313-8903]	IRIS 313-8903	IRGC 120902	ind3	0	A	BPI 76 NON SENSITIVE (GREEN)::IRGC 9790-1::[IRIS 313-8903]	IRIS 313-8903	IRGC 120902	ind3	81											C	-	-	-	-	C	-	G	C	T	T	-	A	-	G	G	C	T	C	C	A	C	A	G	A	A	G	-	-
KALABOKRI::IRGC 43872-1::[IRIS 313-11324]	IRIS 313-11324	IRGC 127477	aus	0	A	KALABOKRI::IRGC 43872-1::[IRIS 313-11324]	IRIS 313-11324	IRGC 127477	aus	93	C	T	C	C	C	C	C	C	C	T	T	T	A	G	A	C	-	G	C	T	T	-	A	-	G	G	C	T	C	C	A	C	A	G	A	A	G	-	-
RD 15::IRGC 47705-1::[IRIS 313-10151]	IRIS 313-10151	IRGC 126003	ind3	0	A	RD 15::IRGC 47705-1::[IRIS 313-10151]	IRIS 313-10151	IRGC 126003	ind3	82	C	T	T	-	-	-	C	C	C	T	C	-	-	-	-	C	-	G	C	T	T	-	A	-	G	G	C	T	C	C	A	C	A	G	A	A	G	-	-
IRGA 959-1-2-2F-4-1-4A-6-CA-6X::IRGC 117006-1::[IRIS 313-10301]	IRIS 313-10301	IRGC 126064	indx	1	C	IRGA 959-1-2-2F-4-1-4A-6-CA-6X::IRGC 117006-1::[IRIS 313-10301]	IRIS 313-10301	IRGC 126064	indx	28	C	T	T	-	-	-	C	C	C	T	C	-	-	-	-	A	A	G	C	T	T	-	A	-	G	G	C	T	T	C	G	T	G	G	G	G	T	T	-
TOS 9795::IRGC 80142-1::[IRIS 313-12024]	IRIS 313-12024	IRGC 127866	ind1B	1	C	TOS 9795::IRGC 80142-1::[IRIS 313-12024]	IRIS 313-12024	IRGC 127866	ind1B	23	C	T	T	-	-	-	C	C	C	T	C	-	-	-	-	A	A	G	C	T	T	-	A	-	G	G	C	T	T	C	G	T	G	G	G	G	T	T	-
IR71466-75-3-B-1::[CX124]	CX124	IRGC 135936	indx	1	C	IR71466-75-3-B-1::[CX124]	CX124	IRGC 135936	indx	26	C	T	T	-	-	-	C	C	C	T	C	-	-	-	-	A	A	G	C	T	T	-	A	-	G	G	C	T	T	C	G	T	G	G	G	G	T	T	-
MR84::[CX156]	CX156	IRGC 135995	indx	1	C	MR84::[CX156]	CX156	IRGC 135995	indx	21	C	T	T	-	-	-	C	C	C	T	C	-	-	-	-	A	A	G	C	T	T	-	A	-	G	G	C	T	T	C	G	T	G	G	G	G	T	T	-
WUYUGENG 3::[CX165]	CX165	IRGC 136071	temp	1	C	WUYUGENG 3::[CX165]	CX165	IRGC 136071	temp	21	C	T	T	-	-	-	C	C	C	T	C	-	-	-	-	A	A	G	C	T	T	-	A	-	G	G	C	T	T	C	G	T	G	G	G	G	T	T	-
829::[CX250]	CX250	IRGC 135820	ind1B	1	C	829::[CX250]	CX250	IRGC 135820	ind1B	24	C	T	T	-	-	-	C	C	C	T	C	-	-	-	-	A	A	G	C	T	T	-	A	-	G	G	C	T	T	C	G	T	G	G	G	G	T	T	-
HNANKAR::[CX31]	CX31	IRGC 135903	ind1B	1	C	HNANKAR::[CX31]	CX31	IRGC 135903	ind1B	25	C	T	T	-	-	-	C	C	C	T	C	-	-	-	-	A	A	G	C	T	T	-	A	-	G	G	C	T	T	C	G	T	G	G	G	G	G	-	-
PSBRC82::[CX358]	CX358	IRGC 136024	ind1B	1	C	PSBRC82::[CX358]	CX358	IRGC 136024	ind1B	19	C	T	T	-	-	-	C	C	C	T	C	-	-	-	-	A	A	G	C	T	T	-	A	-	G	G	C	T	T	C	G	T	G	G	G	G	G	-	-
CHENGHUI 727::[CX370]	CX370		ind1B	1	C	CHENGHUI 727::[CX370]	CX370		ind1B	12	C	T	T	-	-	-	C	C	C	T	C	-	-	-	-	A	A	G	C	T	T	-	A	-	G	G	C	T	T	C	G	T	G	G	G	G	T	T	-
1088::[CX387]	CX387	IRGC 135812	ind1B	1	C	1088::[CX387]	CX387	IRGC 135812	ind1B	13	C	T	T	-	-	-	C	C	C	T	C	-	-	-	-	A	A	G	C	T	T	-	A	-	G	G	C	T	T	C	G	T	G	G	G	G	G	-/T	-
CX426::[CX426]	CX426		ind1B	1	C	CX426::[CX426]	CX426		ind1B	20	C	T	T	-	-	-	C	C	C	T	C	-	-	-	-	A	A	G	C	T	T	-	A	-	G	G	C	T	T	C	G	T	G	G	G	G	T	T	-
CX561::[CX561]	CX561		ind1B	1	C	CX561::[CX561]	CX561		ind1B	29	C	T	T	-	-	-	C	C	C	T	C	-	-	-	-	A	A	G	C	T	T	-	A	-	G	G	C	T	T	C	G	T	G	G	G	G	T	T	-
CX578::[CX578]	CX578		temp	1	C	CX578::[CX578]	CX578		temp	29	C	T	T	-	-	-	C	C	C	T	C	-	-	-	-	A	A	G	C	T	T	-	A	-	G	G	C	T	T	C	G	T	G	G	G	G	T	T	-
MR106::[CX68]	CX68	IRGC 135989	indx	1	C	MR106::[CX68]	CX68	IRGC 135989	indx	13	C	T	T	-	-	-	C	C	C	T	C	-	-	-	-	C	-	G	C	T	T	-	A	-	G	G	C	T	T	C	G	T	G	G	G	G	G	-	-
EPEAL 102::IRGC 78698-1::[IRIS 313-10220]	IRIS 313-10220	IRGC 126203	indx	1	C	EPEAL 102::IRGC 78698-1::[IRIS 313-10220]	IRIS 313-10220	IRGC 126203	indx	23	C	T	T	-	-	-	C	C	C	T	C	-	-	-	-	A	A	G	C	T	T	-	A	-	G	G	C	T	T	C	G	T	G	G	G	G	T	T	-
PSBRC 86::IRGC 99716-1::[IRIS 313-10237]	IRIS 313-10237		ind1B	1	C	PSBRC 86::IRGC 99716-1::[IRIS 313-10237]	IRIS 313-10237		ind1B	19	C	T	T	-	-	-	C	C	C	T	C	-	-	-	-	C	-	G	C	T	T	-	A	-	G	G	C	T	T	C	G	T	G	G	G	G	G	-	-
PSBRC 88::IRGC 99717-1::[IRIS 313-10238]	IRIS 313-10238	IRGC 125876	ind1B	1	C	PSBRC 88::IRGC 99717-1::[IRIS 313-10238]	IRIS 313-10238	IRGC 125876	ind1B	20	C	T	T	-	-	-	C	C	C	T	C	-	-	-	-	C	-	G	C	T	T	-	A	-	G	G	C	T	T	C	G	T	G	G	G		G	-	-
UQUIHUA::IRGC 117037-1::[IRIS 313-10287]	IRIS 313-10287	IRGC 127068	ind1B	1	C	UQUIHUA::IRGC 117037-1::[IRIS 313-10287]	IRIS 313-10287	IRGC 127068	ind1B	20	C	T	T	-	-	-	C	C	C	T	C	-	-	-	-	A	A	G	C	T	T	-	A	-	G	G	C	T	T	C	G	T	G	G	G	G	G	-	-
CAMPECHE A 79::IRGC 51102-1::[IRIS 313-11437]	IRIS 313-11437	IRGC 127246	ind1B	1	C	CAMPECHE A 79::IRGC 51102-1::[IRIS 313-11437]	IRIS 313-11437	IRGC 127246	ind1B	16	C	T	T	-	-	-	C	C	C	T	C	-	-	-	-	A	A	G	C	T	T	-	A	-	G	G	C	T	T	C	G	T	G	G	G	G	T	T	-
TV 30::IRGC 55221-1::[IRIS 313-11507]	IRIS 313-11507	IRGC 127870	ind1B	1	C	TV 30::IRGC 55221-1::[IRIS 313-11507]	IRIS 313-11507	IRGC 127870	ind1B	19	C	T	T	-	-	-	C	C	C	T	C	-	-	-	-	A	A	G	C	T	T	-	A	-	G	G	C	T	T	C	G	T	G	G	G	G	G	-/T	-
SANHUANGZHAN NO 2::G1::[IRIS 313-15897]	IRIS 313-15897	IRGC 126968	indx	1	C	SANHUANGZHAN NO 2::G1::[IRIS 313-15897]	IRIS 313-15897	IRGC 126968	indx	21	C	T	T	-	-	-	C	C	C	T	C	-	-	-	-	A	A	G	C	T	T	-	A	-	G	G	C	T	T	C	G	T	G	G	G	G	G	-	-
SEBERANG MR 77::C1::[IRIS 313-7773]	IRIS 313-7773	IRGC 124421	ind1B	1	C	SEBERANG MR 77::C1::[IRIS 313-7773]	IRIS 313-7773	IRGC 124421	ind1B	20	C	T	T	-	-	-	C	C	C	T	C	-	-	-	-	C	-	G	C	T	T	-	A	-	G	G	C	T	T	C	G	T	G	G	G	G	G	-	-
DREW::GERVEX 1650-C1::[IRIS 313-8183]	IRIS 313-8183	IRGC 122304	trop	1	C	DREW::GERVEX 1650-C1::[IRIS 313-8183]	IRIS 313-8183	IRGC 122304	trop	19	C	T	T	-	-	-	C	C	C	T	C	-	-	-	-	A	A	G	C	T	T	-	A	-	G	G	C	T	T	C	G	T	G	G	G	G	T	T	-
KATY::IRGC 77140-1::[IRIS 313-8285]	IRIS 313-8285	IRGC 125614	trop	1	C	KATY::IRGC 77140-1::[IRIS 313-8285]	IRIS 313-8285	IRGC 125614	trop	27	C	T	T	-	-	-	C	C	C	T	C	-	-	-	-	C	-	G	C	T	T	-	A	-	G	G	C	T	T	C	G	T	G	G	G	G	T	T	-
POENOET HITAM::IRGC 8193-1::[IRIS 313-8324]	IRIS 313-8324	IRGC 121474	admix	1	C	POENOET HITAM::IRGC 8193-1::[IRIS 313-8324]	IRIS 313-8324	IRGC 121474	admix	23	C	T	T	-	-	-	C	C	C	T	C	-	-	-	-	A	A	G	C	T	T	-	A	-	G	G	C	T	T	C	G	T	G	G	G	G	T	T	-
ARC 12576::IRGC 22163-1::[IRIS 313-8967]	IRIS 313-8967	IRGC 125645	indx	1	C	ARC 12576::IRGC 22163-1::[IRIS 313-8967]	IRIS 313-8967	IRGC 125645	indx	28	C	T	T	-	-	-	C	C	C	T	C	-	-	-	-	A	A	G	C	T	T	-	A	-	G	G	C	T	T	C	G	T	G	G	G	G	G	-	-
CT 9737-6-1-1-2-2P-M::IRGC 117330-1::[IRIS 313-10352]	IRIS 313-10352	IRGC 120922	indx	1	C	CT 9737-6-1-1-2-2P-M::IRGC 117330-1::[IRIS 313-10352]	IRIS 313-10352	IRGC 120922	indx	36	C	T	T	-	-	-	C	C	C	T	C	-	-	-	-	A	A	G	C	T	T	-	A	-	G	G	C	T	T	C	G	T	G	G	G	G	T	T	-
PSBRC 18::IRGC 99639-1::[IRIS 313-12319]	IRIS 313-12319	IRGC 127743	ind1B	1	C	PSBRC 18::IRGC 99639-1::[IRIS 313-12319]	IRIS 313-12319	IRGC 127743	ind1B	19	C	T	T	-	-	-	C	C	C	T	C	-	-	-	-	C	-	G	C	T	T	-	A	-	G	G	C	T	T	C	G	T	G	G	G	G	T	T	-
LIAOGENG 287::[B122]	B122		temp	1	C	LIAOGENG 287::[B122]	B122		temp	20	C	T	T	-	-	-	C	C	C	T	C	-	-	-	-	A	A	G	C	T	T	-	A	-	G	G	C	T	T	C	G	T	G	G	G	G	T	T	-
ZHONGHUA 1::[CX348]	CX348	IRGC 136093	ind1B	1	C	ZHONGHUA 1::[CX348]	CX348	IRGC 136093	ind1B	18	C	T	T	-	-	-	C	C	C	T	C	-	-	-	-	A	A	G	C	T	T	-	A	-	G	G	C	T	T	C	G	T	G	G	G	G	T	T	-
WUYUGENG 20::[CX350]	CX350		temp	1	C	WUYUGENG 20::[CX350]	CX350		temp	19	C	T	T	-	-	-	C	C	C	T	C	-	-	-	-	A	A	G	C	T	T	-	A	-	G	G	C	T	T	C	G	T	G	G	G	G	G	-/T	-
Y075::[CX360]	CX360		ind1B	1	C	Y075::[CX360]	CX360		ind1B	17	C	T	T	-	-	-	C	C	C	T	C	-	-	-	-	A	A	G	C	T	T	-	A	-	G	G	C	T	T	C	G	T	G	G	G	G	T	T	-
OM997::[CX37]	CX37	IRGC 136015	ind1B	1	C	OM997::[CX37]	CX37	IRGC 136015	ind1B	13	C	T	T	-	-	-	C	C	C	T	C	-	-	-	-	A	A	G	C	T	T	-	A	-	G	G	C	T	T	C	G	T	G	G	G	G	G	-	-
NERICA-L-27::[CX377]	CX377	IRGC 136006	ind1B	1	C	NERICA-L-27::[CX377]	CX377	IRGC 136006	ind1B	10	C	T	T	-	-	-	C	C	C	T	C	-	-	-	-	A	A	G	C	T	T	-	A	-	G	G	C	T	T	C	G	T	G	G	G	G	T	T	-
IR64A::[CX403]	CX403		ind1B	1	C	IR64A::[CX403]	CX403		ind1B	22	C	T	T	-	-	-	C	C	C	T	C	-	-	-	-	A	A	G	C	T	T	-	A	-	G	G	C	T	T	C	G	T	G	G	G	G	T	T	-
DUOXI 1::[CX431]	CX431		indx	1	C	DUOXI 1::[CX431]	CX431		indx	20	C	T	T	-	-	-	C	C	C	T	C	-	-	-	-	A	A	G	C	T	T	-	A	-	G	G	C	T	T	C	G	T	G	G	G	G	T	T	-
CX579::[CX579]	CX579		admix	1	C	CX579::[CX579]	CX579		admix	28	C	T	T	-	-	-	C	C	C	T	C	-	-	-	-	A	A	G	C	T	T	-	A	-	G	G	C	T	T	C	G	T	G	G	G	G	T	T	-
BG304::[CX76]	CX76	IRGC 135841	ind1B	1	C	BG304::[CX76]	CX76	IRGC 135841	ind1B	19	C	T	T	-	-	-	C	C	C	T	C	-	-	-	-	A	A	G	C	T	T	-	A	-	G	G	C	T	T	C	G	T	G		G	G	G	-	-
CEA 3::IRGC 116965-1::[IRIS 313-10260]	IRIS 313-10260	IRGC 125957	indx	1	C	CEA 3::IRGC 116965-1::[IRIS 313-10260]	IRIS 313-10260	IRGC 125957	indx	22	C	T	T	-	-	-	C	C	C	T	C	-	-	-	-	A	A	G	C	T	T	-	A	-	G	G	C	T	T	C	G	T	G	G	G	G	T	T	-
CAMPONI::IRGC 116963-1::[IRIS 313-10325]	IRIS 313-10325	IRGC 125956	indx	1	C	CAMPONI::IRGC 116963-1::[IRIS 313-10325]	IRIS 313-10325	IRGC 125956	indx	28	C	T	T	-	-	-	C	C	C	T	C	-	-	-	-	A	A	G	C	T	T	-	A	-	G	G	C	T	T	C	G	T	G	G	G	G	T	T	-
ADNY 11::C1::[IRIS 313-7636]	IRIS 313-7636	IRGC 126992	ind1B	1	C	ADNY 11::C1::[IRIS 313-7636]	IRIS 313-7636	IRGC 126992	ind1B	9	C	T	T	-	-	-	C	C	C	T	C	-	-	-	-	A	A	G	C	T	T	-	A	-	G	G	C	T	T	C	G	T	G	G	G	G	G	-	-
PESAGRO 102::IRGC 78703-1::[IRIS 313-9623]	IRIS 313-9623	IRGC 126001	indx	1	C	PESAGRO 102::IRGC 78703-1::[IRIS 313-9623]	IRIS 313-9623	IRGC 126001	indx	17	C	T	T	-	-	-	C	C	C	T	C	-	-	-	-	C	-	G	C	T	T	-	A	-	G	G	C	T	T	C	G	T	G		G	G	G	-	-
AMERICAN RICE::[B035]	B035	IRGC 135828	indx	1	C	AMERICAN RICE::[B035]	B035	IRGC 135828	indx	17	C	T	T	-	-	-	C	C	C	T	C	-	-	-	-	A	A	G	C	T	T	-	A	-	G	G	C	T	T	C	G	T	G	G	G	G	T	T	-
SAN**QISHILUO::[B088]	B088		indx	1	C	SAN**QISHILUO::[B088]	B088		indx	10	C	T	T	-	-	-	C	C	C	T	C	-	-	-	-	C	-	G	C	T	T	-	A	-					T	C	G	T	G	G	G	G	G	-	-
CHANH 148::[B184]	B184	IRGC 135862	indx	1	C	CHANH 148::[B184]	B184	IRGC 135862	indx	12	C	T	T	-	-	-	C	C	C	T	C	-	-	-	-	A	A	G	C	T	T	-	A	-	G	G	C	T	T	C	G	T	G	G	G	G	G	-	-
CHIEM NGAN::IRGC 47488-1::[IRIS 313-11383]	IRIS 313-11383	IRGC 127274	indx	1	C	CHIEM NGAN::IRGC 47488-1::[IRIS 313-11383]	IRIS 313-11383	IRGC 127274	indx	19.5	C	T	T	-	-	-	C	C	C	T	C	-	-	-	-	A	A	G	C	T	T	-	A	-	G	G	C	T	T	C	G	T	G	G	G	G	T	T	-
CHIEM TONG NHAT 1::IRGC 47496-1::[IRIS 313-11384]	IRIS 313-11384	IRGC 127275	indx	1	C	CHIEM TONG NHAT 1::IRGC 47496-1::[IRIS 313-11384]	IRIS 313-11384	IRGC 127275	indx	19	C	T	T	-	-	-	C	C	C	T	C	-	-	-	-	C	-	G	C	T	T	-	A	-	G	G	C	T	T	C	G	T	G	G	G	G	T	T	-
WAS 63-22-5-9-10-1::C1::[IRIS 313-7832]	IRIS 313-7832	IRGC 122297	ind1B	1	C	WAS 63-22-5-9-10-1::C1::[IRIS 313-7832]	IRIS 313-7832	IRGC 122297	ind1B	17	C	T	T	-	-	-	C	C	C	T	C	-	-	-	-	C	-	G	C	T	T	-	A	-	G	G	C	T	T	C	G	T	G	G	G	G	G	-	-
PARN A 191::IRGC 4932-1::[IRIS 313-10506]	IRIS 313-10506		ind3	0	A	PARN A 191::IRGC 4932-1::[IRIS 313-10506]	IRIS 313-10506		ind3	47	C	T	T	-	-	-	C	C	C	T	C	-	-	-	-	C	-	G	C	T	T	-			G	G	C	T	C	C	A	C	A	G	A	A	G	-	-
HEENDIKWEE::IRGC 15587-2::[IRIS 313-10720]	IRIS 313-10720	IRGC 132337	indx	0	A	HEENDIKWEE::IRGC 15587-2::[IRIS 313-10720]	IRIS 313-10720	IRGC 132337	indx	37	C	T	T	-	-	-	C	C	C	T													A	-	G	G	C	T						G			G	-	-
DV 110::IRGC 8855-1::[IRIS 313-10606]	IRIS 313-10606	IRGC 127346	aus	0	A	DV 110::IRGC 8855-1::[IRIS 313-10606]	IRIS 313-10606	IRGC 127346	aus	47.5	C	T	T	-	-	-	C	C	C	T	C	-	-	-	-			G	C	T	T	-			G	G	C	T		C	A	C	A	G	A	A	G	-	-
PUSA(BASMATI 1)::[CX46]	CX46	IRGC 136026	admix	0	A	PUSA(BASMATI 1)::[CX46]	CX46	IRGC 136026	admix	40											C	-	-	-	-	C	-	G	C	T	T	-			G	G	C	T	C	C	A	C	A	G	A	A	G	-	-
B 12::IRGC 31293-1::[IRIS 313-11108]	IRIS 313-11108	IRGC 127194	ind3	0	A	B 12::IRGC 31293-1::[IRIS 313-11108]	IRIS 313-11108	IRGC 127194	ind3	51											C	-	-	-	-	C	-	G	C	T			A	-	G	G	C	T		C				G	A	A	G	-	-
HTAWPATT::IRGC 33125-2::[IRIS 313-11130]	IRIS 313-11130	IRGC 128055	indx	0	A	HTAWPATT::IRGC 33125-2::[IRIS 313-11130]	IRIS 313-11130	IRGC 128055	indx	27	C	T	T	-	-	-	C	C	C	T	C	-	-	-	-	C	-	G	C	T	T	-			G	G	C	T		C
ARC 13778::IRGC 41216-1::[IRIS 313-9347]	IRIS 313-9347	IRGC 125647	indx	1	C	ARC 13778::IRGC 41216-1::[IRIS 313-9347]	IRIS 313-9347	IRGC 125647	indx	5	C	T	T	-	-	-	C	C	C	T	C	-	-	-	-	C	-	G	C	T	T	-	A	-	G	G	C	T	T	C	G	T	G	G	G	G	G	-	-
KOUINONEPOU::IRGC 56663-1::[IRIS 313-11524]	IRIS 313-11524	IRGC 132405	trop	0	A	KOUINONEPOU::IRGC 56663-1::[IRIS 313-11524]	IRIS 313-11524	IRGC 132405	trop	0	C	T	T	-	-	-	C	C	C	T	C	-	-	-	-	C	-	G	C	T	T	-	A	-	G	G	C	T	T	C	G	T	G	G	G	G	G	-	-
AT354::[CX75]	CX75	IRGC 135832	indx	1	C	AT354::[CX75]	CX75	IRGC 135832	indx	16	C	T	T	-	-	-	C	C	C	T	C	-	-	-	-	C	-	G	C	T	T	-	A	-	G	G	C	T	T	C				G			G	-	-
IR 9560-2-6-3::IRGC 40451-1::[IRIS 313-11250]	IRIS 313-11250	IRGC 127441	ind1B	1	C	IR 9560-2-6-3::IRGC 40451-1::[IRIS 313-11250]	IRIS 313-11250	IRGC 127441	ind1B	16	C	T	T	-	-	-	C	C	C	T	C	-	-	-	-	C	-	G	C	T	T	-	A	-	G	G	C	T	T	C	G	T	G	G	G	G	G	-	-
HOU LU BAI::IRGC 76582-1::[IRIS 313-11948]	IRIS 313-11948	IRGC 127417	ind1A	1	C	HOU LU BAI::IRGC 76582-1::[IRIS 313-11948]	IRIS 313-11948	IRGC 127417	ind1A	19	C	T	T	-	-	-	C	C	C	T	C	-	-	-	-	A	A	G	C	T	T	-	A	-	G	G	C	T	T	C	G	T	G	G	G	G	T	T	-
N 22::IRGC 46459-1::[IRIS 313-10150]	IRIS 313-10150	IRGC 126249	aus	0	A	N 22::IRGC 46459-1::[IRIS 313-10150]	IRIS 313-10150	IRGC 126249	aus	3	C	T	T	-	-	-	C	C	C	T	C	-	-	-	-	C	-	G	C	T	T	-	A	-	G	G	C	T	T								G	-	-
LACASSINE::GERVEX 1660-C1::[IRIS 313-8193]	IRIS 313-8193	IRGC 122146	trop	0	A	LACASSINE::GERVEX 1660-C1::[IRIS 313-8193]	IRIS 313-8193	IRGC 122146	trop	0	C	T	T	-	-	-	C	C	C	T	C	-	-	-	-	C	-	G	C	T	T	-	A	-	G	G	C	T	T	C	G	T	G	G	G	G	G	-	-
LING TA 150::IRGC 1106-1::[IRIS 313-10452]	IRIS 313-10452	IRGC 127565	ind1A	1	C	LING TA 150::IRGC 1106-1::[IRIS 313-10452]	IRIS 313-10452	IRGC 127565	ind1A	5	C	T	T	-	-	-	C	C	C	T	C	-	-	-	-	A	A	G	C	T	T	-	A	-	G	G	C	T	T	C	G	T	G	G	G	G	G	-	-
BADAL 76::IRGC 6586-1::[IRIS 313-10539]	IRIS 313-10539	IRGC 127199	ind2	1	C	BADAL 76::IRGC 6586-1::[IRIS 313-10539]	IRIS 313-10539	IRGC 127199	ind2	6	C	T	T	-	-	-	C	C	C	T	C	-	-	-	-	C	-	G	C	T	T	-	A	-	G	G	C	T	T	C	G	T	G		G	G	G	-	-
PUTTIGE::IRGC 52588-1::[IRIS 313-8921]	IRIS 313-8921	IRGC 125879	temp	0		PUTTIGE::IRGC 52588-1::[IRIS 313-8921]	IRIS 313-8921	IRGC 125879	temp	0
KONAMANI::IRGC 49806-1::[IRIS 313-11416]	IRIS 313-11416	IRGC 127529	ind2	0.5	A/C	KONAMANI::IRGC 49806-1::[IRIS 313-11416]	IRIS 313-11416	IRGC 127529	ind2	48.5	C	T	T	-	-	-	C	C	C	T	C	-	-	-	-	A	A	G	C	T	T	-	A	-	G	G	C	T	T/C	C	G/A	T/C	G/A		G/A	G/A	G	-	-
COMPACT PLANT TYPE MATERIAL::[CX365]	CX365		admix	0.5	A/C	COMPACT PLANT TYPE MATERIAL::[CX365]	CX365		admix	46	C	T	T	-	-	-	C	C	C	T	C	-	-	-	-	C	-/A	G	C	T	T	-/A	A	-/A	G	G	C	T	T/C	C	G/A	T/C	G/A	G	G/A	G/A	G	-/A	-
KOTHMALLI KARUPPAN::IRGC 7842-1::[IRIS 313-10572]	IRIS 313-10572	IRGC 127533	indx	0.5	A/C	KOTHMALLI KARUPPAN::IRGC 7842-1::[IRIS 313-10572]	IRIS 313-10572	IRGC 127533	indx	25.5	C	T	T	-	-	-	C	C	C	T	C	-	-	-	-	C	-	G	C	T	T	-	A	-	G	G	C	T	T	C				G			G	-	-
KEMA 5::IRGC 19343-2::[IRIS 313-10825]	IRIS 313-10825	IRGC 132310	indx	0.5	A/C	KEMA 5::IRGC 19343-2::[IRIS 313-10825]	IRIS 313-10825	IRGC 132310	indx	50.5	C	T	T	-	-	-	C	C/-	C/-	T/-	C	-	-	-	-	A	A	G	C	T	T	-	A	-	G	G	C	T	T/C	C	G/A	T/C	G/A	G	G/A	G/A	G	-	-
SXC 216::IRGC 35175-1::[IRIS 313-11176]	IRIS 313-11176	IRGC 127831	indx	0.5	A/C	SXC 216::IRGC 35175-1::[IRIS 313-11176]	IRIS 313-11176	IRGC 127831	indx	16	C	T	T	-	-	-	C	C	C	T	C	-	-	-	-			G	C	T	T	-	A	-	G	G	C	T	T	C	G	T		G			G	-	-
SELN 244A6-20::[B021]	B021	IRGC 136044	indx	1	C	SELN 244A6-20::[B021]	B021	IRGC 136044	indx	19	C	T	T	-	-	-	C	C	C	T	C	-	-	-	-	A	A	G	C	T	T	-	A	-	G	G	C	T	T	C	G	T	G	G	G	G	T	T	T
NGATSIN::[B031]	B031	IRGC 136007	ind2	1	C	NGATSIN::[B031]	B031	IRGC 136007	ind2	20	C	T	T	-	-	-	C	C	C	T	C	-	-	-	-	A	A	G	C	T	T	-	A	-	G	G	C	T	T	C	G	T	G	G	G	G	T	T	T
BW 293-2::[B033]	B033	IRGC 135853	ind1B	1	C	BW 293-2::[B033]	B033	IRGC 135853	ind1B	27	C	T	T	-	-	-	C	C	C	T	C	-	-	-	-	A	A	G	C	T	T	-	A	-	G	G	C	T	T	C	G	T	G	G	G	G	G	-	-
GUIZHAO 2::[B063]	B063		ind1A	1	C	GUIZHAO 2::[B063]	B063		ind1A	17	C	T	T	-	-	-	C	C	C	T	C	-	-	-	-	A	A	G	C	T	T	-	A	-	G	G	C	T	T	C	G	T	G	G	G	G	G	-	-
XIANGZAOXIAN 7::[B064]	B064		indx	1	C	XIANGZAOXIAN 7::[B064]	B064		indx	21	C	T	T	-	-	-	C	C	C	T	C	-	-	-	-	A	A	G	C	T	T	-	A	-	G	G	C	T	T	C	G	T	G	G	G	G	G	-	-
HUANGSIGUIZHAN::[B065]	B065		indx	1	C	HUANGSIGUIZHAN::[B065]	B065		indx	18	C	T	T	-	-	-	C	C	C	T	C	-	-	-	-	A	A	G	C	T	T	-	A	-	G	G	C	T	T	C	G	T	G	G	G	G	T	T	T
JINXIBAI2::[B073]	B073		indx	1	C	JINXIBAI2::[B073]	B073		indx	29	C	T	T	-	-	-	C	C	C	T	C	-	-	-	-	A	A	G	C	T	T	-	A	-	G	G	C	T	T	C	G	T	G	G	G	G	T	T	T
MINBEIWANXIAN::[B076]	B076		indx	1	C	MINBEIWANXIAN::[B076]	B076		indx	21	C	T	T	-	-	-	C	C	C	T	C	-	-	-	-	A	A	G	C	T	T	-	A	-	G	G	C	T	T	C	G	T	G	G	G	G	T	T	T
ESINIU::[B079]	B079	IRGC 135887	ind1A	1	C	ESINIU::[B079]	B079	IRGC 135887	ind1A	20	C	T	T	-	-	-	C	C	C	T	C	-	-	-	-	A	A	G	C	T	T	-	A	-	G	G	C	T	T	C	G	T	G	G	G	G	T	T	-
HEIDU 4::[B081]	B081	IRGC 135901	ind1A	1	C	HEIDU 4::[B081]	B081	IRGC 135901	ind1A	29	C	T	T	-	-	-	C	C	C	T	C	-	-	-	-	A	A	G	C	T	T	-	A	-	G	G	C	T	T	C	G	T	G	G	G	G	T	T	-
MUGUANUO::[B086]	B086		admix	1	C	MUGUANUO::[B086]	B086		admix	27	C	T	T	-	-	-	C	C	C	T	C	-	-	-	-	A	A	G	C	T	T	-	A	-	G	G	C	T	T	C	G	T	G	G		G	T	T	T
WENXIANGNUO::[B106]	B106		indx	1	C	WENXIANGNUO::[B106]	B106		indx	21	C	T	T	-	-	-	C	C	C	T	C	-	-	-	-	A	A	G	C	T	T	-	A	-	G	G	C	T	T	C	G	T	G	G	G	G	T	T	T
CHENWAN 3::[B113]	B113		indx	1	C	CHENWAN 3::[B113]	B113		indx	23	C	T	T	-	-	-	C	C	C	T	C	-	-	-	-	A	A	G	C	T	T	-	A	-	G	G	C	T		C				G	G	G	T	T	T
AIMAKANG::[B115]	B115		ind1A	1	C	AIMAKANG::[B115]	B115		ind1A	21	C	T	T	-	-	-	C	C	C	T	C	-	-	-	-	A	A	G	C	T	T	-	A	-	G	G	C	T	T	C	G	T	G	G	G	G	G	-	-
HONGWAN 1::[B120]	B120		indx	1	C	HONGWAN 1::[B120]	B120		indx	9	C	T	T	-	-	-	C	C	C	T	C	-	-	-	-	C	-	G	C	T	T	-	A	-	G	G	C	T	T	C	G	T	G	G	G	G	G	-	-
HONGAINUO::[B129]	B129		indx	1	C	HONGAINUO::[B129]	B129		indx	23	C	T	T	-	-	-	C	C	C	T	C	-	-	-	-	A	A	G	C	T	T	-	A	-	G	G	C	T	T	C	G	T	G	G	G	G	T	T	T
AIZIZHAN::[B131]	B131		indx	1	C	AIZIZHAN::[B131]	B131		indx	21	C	T	T	-	-	-	C	C	C	T	C	-	-	-	-	A	A	G	C	T	T	-	A	-	G	G	C	T	T	C	G	T	G	G	G	G	T	T	T
TEQINGXUANHUI::[B145]	B145		indx	1	C	TEQINGXUANHUI::[B145]	B145		indx	8	C	T	T	-	-	-	C	C	C	T	C	-	-	-	-	C	-	G	C	T	T	-	A	-	G	G	C	T	T	C	G	T	G	G	G	G	G	-	-
HAOXIANG::[B149]	B149		ind1A	1	C	HAOXIANG::[B149]	B149		ind1A	23	C	T	T	-	-	-	C	C	C	T	C	-	-	-	-	A	A	G	C	T	T	-	A	-	G	G	C	T	T	C	G	T	G	G	G	G	T	T	T
LIUSHIZAO::[B163]	B163		ind1A	1	C	LIUSHIZAO::[B163]	B163		ind1A	17	C	T	T	-	-	-	C	C	C	T	C	-	-	-	-	C	-/A	G	C	T	T	-/A	A	-/A	G	G	C	T	T	C	G	T	G	G	G	G	T	A/T	-
HAOHUANGLA::[B165]	B165		indx	1	C	HAOHUANGLA::[B165]	B165		indx	16	C	T	T	-	-	-	C	C	C	T	C	-	-	-	-			G	C	T	T	-	A	-	G	G	C	T	T	C	G	T	G	G	G	G	G	-	-
PMS 10B::[B195]	B195	IRGC 136021	indx	1	C	PMS 10B::[B195]	B195	IRGC 136021	indx	19	C	T	T	-	-	-	C	C	C	T	C	-	-	-	-	A	A	G	C	T	T	-	A	-	G	G	C	T	T	C	G	T	G	G	G	G	G	-	-
JIEFANGXIAN::[B198]	B198		ind1A	1	C	JIEFANGXIAN::[B198]	B198		ind1A	14	C	T	T	-	-	-	C	C	C	T	C	-	-	-	-	A	A	G	C	T	T	-	A	-	G	G	C	T	T	C	G	T	G	G	G	G	T	T	T
LIUYENIAN::[B213]	B213		ind1A	1	C	LIUYENIAN::[B213]	B213		ind1A	18	C	T	T	-	-	-	C	C	C	T	C	-	-	-	-	A	A	G	C	T	T	-	A	-	G	G	C	T	T	C	G	T	G	G	G	G	T	T	T
HAOLAI::[B219]	B219		indx	1	C	HAOLAI::[B219]	B219		indx	18	C	T	T	-	-	-	C	C	C	T	C	-	-	-	-	C	-	G	C	T	T	-	A	-	G	G	C	T	T	C	G	T	G	G	G	G	G	-	-
MENJIAGAO 1::[B227]	B227		indx	1	C	MENJIAGAO 1::[B227]	B227		indx	8	C	T	T	-	-	-	C	C	C	T	C	-	-	-	-	C	-	G	C	T	T	-	A	-	G	G	C	T	T	C	G	T	G	G	G	G	G	-	-
B231::[B231]	B231		indx	1	C	B231::[B231]	B231		indx	25	C	T	T	-	-	-	C	C	C	T	C	-	-	-	-	A	A	G	C	T	T	-	A	-	G	G	C	T	T	C	G	T	G	G	G	G	T	T	T
XIANGWANXIAN 1::[B233]	B233		indx	1	C	XIANGWANXIAN 1::[B233]	B233		indx	20	C	T	T	-	-	-	C	C	C	T	C	-	-	-	-	A	A	G	C	T	T	-	A	-	G	G	C	T	T	C	G	T	G	G	G	G	T	T	T
LEIHUOZHAN::[B259]	B259		ind1A	1	C	LEIHUOZHAN::[B259]	B259		ind1A	26	C	T	T	-	-	-	C	C	C	T	C	-	-	-	-	A	A	G	C	T	T	-	A	-	G	G	C	T	T	C	G	T	G	G	G	G	T	T	T
WUKEZHAN::[B265]	B265		indx	1	C	WUKEZHAN::[B265]	B265		indx	29	C	T	T	-	-	-	C	C	C	T	C	-	-	-	-	A	A	G	C	T	T	-	A	-	G	G	C	T	T	C	G	T	G	G	G	G	T	T	T
TEK SI CHUT::[CX102]	CX102	IRGC 136053	ind1A	1	C	TEK SI CHUT::[CX102]	CX102	IRGC 136053	ind1A	29	C	T	T	-	-	-	C	C	C	T	C	-	-	-	-	A	A	G	C	T	T	-	A	-	G	G	C	T	T	C	G	T	G	G	G	G	T	T	T
TUN SART::[CX107]	CX107	IRGC 136060	ind3	1	C	TUN SART::[CX107]	CX107	IRGC 136060	ind3	29	C	T	T	-	-	-	C	C	C	T	C	-	-	-	-	A	A	G	C	T	T	-	A	-	G	G	C	T	T	C	G	T	G	G	G	G	T	T	T
YETUOZAI::[CX118]	CX118		indx	1	C	YETUOZAI::[CX118]	CX118		indx	22	C	T	T	-	-	-	C	C	C	T	C	-	-	-	-	A	A	G	C	T	T	-	A	-	G	G	C	T	T	C	G	T	G	G	G	G	G	-	-
P59279::[CX119]	CX119		indx	1	C	P59279::[CX119]	CX119		indx	11	C	T	T	-	-	-	C	C	C	T	C	-	-	-	-	C	-	G	C	T	T	-	A	-	G	G	C	T	T	C	G	T	G	G	G	G	G	-	-
TKM6::[CX120]	CX120	IRGC 136057	indx	1	C	TKM6::[CX120]	CX120	IRGC 136057	indx	33	C	T	T	-	-	-	C	C	C	T	C	-	-	-	-	A	A	G	C	T	T	-	A	-	G	G	C	T	T	C	G	T	G	G	G	G	T	T	T
GUANG122::[CX121]	CX121		ind1B	1	C	GUANG122::[CX121]	CX121		ind1B	23	C	T	T	-	-	-	C	C	C	T	C	-	-	-	-	A	A	G	C	T	T	-	A	-	G	G	C	T	T	C	G	T	G	G	G	G	T	T	T
SRI RAJA::[CX148]	CX148	IRGC 136050	ind3	1	C	SRI RAJA::[CX148]	CX148	IRGC 136050	ind3	29	C	T	T	-	-	-	C	C	C	T	C	-	-	-	-	A	A	G	C	T	T	-	A	-	G	G	C	T	T	C	G	T	G	G	G	G	T	T	T
JALMAGNA::[CX153]	CX153	IRGC 135951	ind2	1	C	JALMAGNA::[CX153]	CX153	IRGC 135951	ind2	13	C	T	T	-	-	-	C	C	C	T	C	-	-	-	-	A	A	G	C	T	T	-	A	-	G	G	C	T	T	C	G	T	G	G	G	G	G	-	-
PTB33::[CX157]	CX157	IRGC 136025	indx	1	C	PTB33::[CX157]	CX157	IRGC 136025	indx	21	C	T	T	-	-	-	C	C	C	T	C	-	-	-	-	A	A	G	C	T	T	-	A	-	G	G	C	T	T	C	G	T	G	G	G	G	G	-	-
SHWE WAR TUN::[CX158]	CX158	IRGC 136046	ind3	1	C	SHWE WAR TUN::[CX158]	CX158	IRGC 136046	ind3	22	C	T	T	-	-	-	C	C	C	T	C	-	-	-	-	A	A	G	C	T	T	-	A	-	G	G	C	T	T	C	G	T	G	G	G	G	T	T	T
IR42::[CX161]	CX161	IRGC 135920	ind1B	1	C	IR42::[CX161]	CX161	IRGC 135920	ind1B	21	C	T	T	-	-	-	C	C	C	T	C	-	-	-	-	A	A	G	C	T	T	-	A	-	G	G	C	T	T	C	G	T	G	G	G	G	T	T	T
IR77298-14-1-2::[CX225]	CX225	IRGC 135938	ind1B	1	C	IR77298-14-1-2::[CX225]	CX225	IRGC 135938	ind1B	17	C	T	T	-	-	-	C	C	C	T	C	-	-	-	-	A	A	G	C	T	T	-	A	-	G	G	C	T	T	C	G	T	G	G	G	G	T	T	T
IR06G113::[CX226]	CX226	IRGC 135916	ind1B	1	C	IR06G113::[CX226]	CX226	IRGC 135916	ind1B	21	C	T	T	-	-	-	C	C	C	T	C	-	-	-	-	A	A	G	C	T	T	-	A	-	G	G	C	T	T	C	G	T	G	G	G	G	T	T	T
RASI::[CX23]	CX23		ind3	1	C	RASI::[CX23]	CX23		ind3	11	C	T	T	-	-	-	C	C	C	T	C	-	-	-	-	C	-	G	C	T	T	-	A	-	G	G	C	T	T	C	G	T	G	G	G	G	G	-	-
IR58821-23-1-3-1::[CX233]	CX233	IRGC 135926	indx	1	C	IR58821-23-1-3-1::[CX233]	CX233	IRGC 135926	indx	26	C	T	T	-	-	-	C	C	C	T	C	-	-	-	-	A	A	G	C	T	T	-	A	-	G	G	C	T	T	C	G	T	G	G	G	G	T	T	T
IRAT144::[CX247]	CX247	IRGC 135942	indx	1	C	IRAT144::[CX247]	CX247	IRGC 135942	indx	12	C	T	T	-	-	-	C	C	C	T	C	-	-	-	-	C	-	G	C	T	T	-	A	-	G	G	C	T	T	C	G	T	G	G	G	G	G	-	-
AMOL3(SANA)::[CX26]	CX26		ind1B	1	C	AMOL3(SANA)::[CX26]	CX26		ind1B	19	C	T	T	-	-	-	C	C	C	T	C	-	-	-	-	A	A	G	C	T	T	-	A	-	G	G	C	T	T	C	G	T	G	G	G	G	T	T	T
MR185::[CX30]	CX30	IRGC 135991	ind1B	1	C	MR185::[CX30]	CX30	IRGC 135991	ind1B	19	C	T	T	-	-	-	C	C	C	T	C	-	-	-	-	A	A	G	C	T	T	-	A	-	G	G	C	T	T	C	G	T	G	G	G	G	G	-	-
HEIHEAIHUI::[CX318]	CX318		indx	1	C	HEIHEAIHUI::[CX318]	CX318		indx	21	C	T	T	-	-	-	C	C	C	T	C	-	-	-	-	A	A	G	C	T	T	-	A	-	G	G	C	T	T	C	G	T	G	G	G	G	T	T	T
HUA 565::[CX341]	CX341	IRGC 135908	indx	1	C	HUA 565::[CX341]	CX341	IRGC 135908	indx	27	C	T	T	-	-	-	C	C	C	T	C	-	-	-	-	A	A	G	C	T	T	-	A	-	G	G	C	T	T	C	G	T	G	G	G	G	T	T	T
SAGCï¼4::[CX346]	CX346	IRGC 136038	indx	1	C	SAGCï¼4::[CX346]	CX346	IRGC 136038	indx	21	C	T	T	-	-	-	C	C	C	T	C	-	-	-	-	A	A	G	C	T	T	-	A	-	G	G	C	T	T	C	G	T	G	G	G	G	G	-	-
KCD1::[CX349]	CX349	IRGC 135965	indx	1	C	KCD1::[CX349]	CX349	IRGC 135965	indx	20	C	T	T	-	-	-	C	C	C	T	C	-	-	-	-	A	A	G	C	T	T	-	A	-	G	G	C	T	T	C	G	T	G	G	G	G	T	T	T
PSBRC80::[CX357]	CX357	IRGC 136023	ind1B	1	C	PSBRC80::[CX357]	CX357	IRGC 136023	ind1B	27	C	T	T	-	-	-	C	C	C	T	C	-	-	-	-	A	A	G	C	T	T	-	A	-	G	G	C	T	T	C	G	T	G		G	G	T	T	T
42686::[CX364]	CX364		ind1B	1	C	42686::[CX364]	CX364		ind1B	27	C	T	T	-	-	-	C	C	C	T	C	-	-	-	-	A	A	G	C	T	T	-	A	-	G	G	C	T	T	C	G	T	G	G	G	G	T	T	T
HUHAN 15::[CX378]	CX378		ind1B	1	C	HUHAN 15::[CX378]	CX378		ind1B	15	C	T	T	-	-	-	C	C	C	T	C	-	-	-	-	A	A	G	C	T	T	-	A	-	G	G	C	T	T	C	G	T	G	G	G	G	T	T	T
NIONOKA::[CX379]	CX379	IRGC 136008	ind1B	1	C	NIONOKA::[CX379]	CX379	IRGC 136008	ind1B	10	C	T	T	-	-	-	C	C	C	T	C	-	-	-	-	A	A	G	C	T	T	-	A	-	G	G	C	T	T	C	G	T	G	G	G	G	T	T	T
ADNY 11::[CX381]	CX381	IRGC 135821	ind1B	1	C	ADNY 11::[CX381]	CX381	IRGC 135821	ind1B	18	C	T	T	-	-	-	C	C	C	T	C	-	-	-	-	A	A	G	C	T	T	-	A	-	G	G	C	T	T	C	G	T	G	G	G	G	G	-	-
NPT-100::[CX385]	CX385	IRGC 136011	ind1B	1	C	NPT-100::[CX385]	CX385	IRGC 136011	ind1B	14	C	T	T	-	-	-	C	C	C	T	C	-	-	-	-	A	A	G	C	T	T	-	A	-	G	G	C	T	T	C	G	T	G	G	G	G	G	-	-
KR200::[CX388]	CX388	IRGC 135972	ind1B	1	C	KR200::[CX388]	CX388	IRGC 135972	ind1B	20	C	T	T	-	-	-	C	C	C	T	C	-	-	-	-	A	A	G	C	T	T	-	A	-	G	G	C	T	T	C	G	T	G	G	G	G	T	T	T
MATATAG2::[CX399]	CX399	IRGC 135982	ind1B	1	C	MATATAG2::[CX399]	CX399	IRGC 135982	ind1B	12	C	T	T	-	-	-	C	C	C	T	C	-	-	-	-	C	-	G	C	T	T	-	A	-	G	G	C	T	T	C	G	T	G	G	G	G	G	-	-
IR58025B::[CX44]	CX44	IRGC 135925	ind1B	1	C	IR58025B::[CX44]	CX44	IRGC 135925	ind1B	19	C	T	T	-	-	-	C	C	C	T	C	-	-	-	-	A	A	G	C	T	T	-	A	-	G	G	C	T	T	C	G	T	G	G	G	G	G	-	-
INNMAYEBAW::[CX71]	CX71	IRGC 135915	ind3	1	C	INNMAYEBAW::[CX71]	CX71	IRGC 135915	ind3	11	C	T	T	-	-	-	C	C	C	T	C	-	-	-	-			G	C	T	T	-	A	-	G	G	C	T	T	C	G	T	G	G	G	G	G	-	-
HUANYANGNIAN::[CX88]	CX88		ind1A	1	C	HUANYANGNIAN::[CX88]	CX88		ind1A	10	C	T	T	-	-	-	C	C	C	T	C	-	-	-	-	A	A	G	C	T	T	-	A	-	G	G	C	T	T	C	G	T	G	G	G	G	G	-	-
GOVIND::[CX91]	CX91	IRGC 135897	ind1B	1	C	GOVIND::[CX91]	CX91	IRGC 135897	ind1B	16	C	T	T	-	-	-	C	C	C	T	C	-	-	-	-	A	A	G	C	T	T	-	A	-	G	G	C	T	T	C	G	T	G	G	G	G	T	T	T
BUDDA::[CX97]	CX97	IRGC 135851	ind1B	1	C	BUDDA::[CX97]	CX97	IRGC 135851	ind1B	29	C	T	T	-	-	-	C	C	C	T	C	-	-	-	-	A	A	G	C	T	T	-	A	-	G	G	C	T	T	C	G	T	G	G	G	G	T	T	T
C 662083::IRGC 62101-1::[IRIS 313-10001]	IRIS 313-10001	IRGC 125692	ind1B	1	C	C 662083::IRGC 62101-1::[IRIS 313-10001]	IRIS 313-10001	IRGC 125692	ind1B	20	C	T	T	-	-	-	C	C	C	T	C	-	-	-	-	A	A	G	C	T	T	-	A	-	G	G	C	T	T	C	G	T	G	G	G	G	T	T	T
LALKA (LAL DHAN)::IRGC 64946-1::[IRIS 313-10010]	IRIS 313-10010	IRGC 125818	ind2	1	C	LALKA (LAL DHAN)::IRGC 64946-1::[IRIS 313-10010]	IRIS 313-10010	IRGC 125818	ind2	29	C	T	T	-	-	-	C	C	C	T	C	-	-	-	-	A	A	G	C	T	T	-	A	-	G	G	C	T	T	C	G	T	G	G	G	G	T	T	T
BOHOTO BALOOCHESTAN::IRGC 66237-1::[IRIS 313-10016]	IRIS 313-10016	IRGC 125954	indx	1	C	BOHOTO BALOOCHESTAN::IRGC 66237-1::[IRIS 313-10016]	IRIS 313-10016	IRGC 125954	indx	12	C	T	T	-	-	-	C	C	C	T	C	-	-	-	-	A	A	G	C	T	T	-	A	-	G	G	C	T	T	C	G	T	G		G	G	G	-	-
RIZ INDETERMINE::IRGC 69014-1::[IRIS 313-10034]	IRIS 313-10034	IRGC 125886	indx	1	C	RIZ INDETERMINE::IRGC 69014-1::[IRIS 313-10034]	IRIS 313-10034	IRGC 125886	indx	16	C	T	T	-	-	-	C	C	C	T	C	-	-	-	-	C	-	G	C	T	T	-	A	-	G	G	C	T	T	C	G	T	G	G	G	G	G	-	-
BANTA TIMA::IRGC 69474-1::[IRIS 313-10045]	IRIS 313-10045	IRGC 125673	indx	1	C	BANTA TIMA::IRGC 69474-1::[IRIS 313-10045]	IRIS 313-10045	IRGC 125673	indx	15	C	T	T	-	-	-	C	C	C	T	C	-	-	-	-	C	-	G	C	T	T	-	A	-	G	G	C	T	T	C	G	T	G	G	G	G	G	-	-
MOVE (MOKOLE)::IRGC 69739-1::[IRIS 313-10048]	IRIS 313-10048	IRGC 125996	indx	1	C	MOVE (MOKOLE)::IRGC 69739-1::[IRIS 313-10048]	IRIS 313-10048	IRGC 125996	indx	19	C	T	T	-	-	-	C	C	C	T	C	-	-	-	-	C	-	G	C	T	T	-	A	-	G	G	C	T	T	C	G	T	G	G	G	G	T	T	T
TSIMATAHOPAOSA::IRGC 69884-1::[IRIS 313-10050]	IRIS 313-10050	IRGC 127091	indx	1	C	TSIMATAHOPAOSA::IRGC 69884-1::[IRIS 313-10050]	IRIS 313-10050	IRGC 127091	indx	20	C	T	T	-	-	-	C	C	C	T	C	-	-	-	-	A	A	G	C	T	T	-	A	-	G	G	C	T	T	C	G	T	G	G	G	G	G	-	-
TAMASHIRO HIKARI::IRGC 74534-1::[IRIS 313-10077]	IRIS 313-10077	IRGC 125917	indx	1	C	TAMASHIRO HIKARI::IRGC 74534-1::[IRIS 313-10077]	IRIS 313-10077	IRGC 125917	indx	16	C	T	T	-	-	-	C	C	C	T	C	-	-	-	-	A	A	G	C	T	T	-	A	-	G	G	C	T	T	C	G	T	G	G	G	G	T	T	T
DALSUNG 41::IRGC 79385-1::[IRIS 313-10103]	IRIS 313-10103	IRGC 125721	indx	1	C	DALSUNG 41::IRGC 79385-1::[IRIS 313-10103]	IRIS 313-10103	IRGC 125721	indx	16	C	T	T	-	-	-	C	C	C	T	C	-	-	-	-	C	-	G	C	T	T	-	A	-	G	G	C	T	T	C	G	T	G	G	G	G
RD 19::IRGC 39174-1::[IRIS 313-10147]	IRIS 313-10147		ind3	1	C	RD 19::IRGC 39174-1::[IRIS 313-10147]	IRIS 313-10147		ind3	17	C	T	T	-	-	-	C	C	C	T	C	-	-	-	-	C	-	G	C	T	T	-	A	-	G	G	C	T	T	C	G	T	G	G	G	G	T	T	T
HE GU TSAO::IRGC 51302-1::[IRIS 313-10154]	IRIS 313-10154	IRGC 125760	ind1A	1	C	HE GU TSAO::IRGC 51302-1::[IRIS 313-10154]	IRIS 313-10154	IRGC 125760	ind1A	26	C	T	T	-	-	-	C	C	C	T	C	-	-	-	-	C	-	G	C	T	T	-	A	-	G	G	C	T	T	C	G	T	G	G	G	G	T	T	-
DA GANG ZHAN::IRGC 67103-1::[IRIS 313-10177]	IRIS 313-10177	IRGC 125719	indx	1	C	DA GANG ZHAN::IRGC 67103-1::[IRIS 313-10177]	IRIS 313-10177	IRGC 125719	indx	37	C	T	T	-	-	-	C	C	C	T	C	-	-	-	-	A	A	G	C	T	T	-	A	-	G	G	C	T	T	C	G	T	G	G	G	G	T	T	T
GAO JIAO BAI::IRGC 68047-1::[IRIS 313-10178]	IRIS 313-10178	IRGC 125748	ind1A	1	C	GAO JIAO BAI::IRGC 68047-1::[IRIS 313-10178]	IRIS 313-10178	IRGC 125748	ind1A	24	C	T	T	-	-	-	C	C	C	T	C	-	-	-	-	A	A	G	C	T	T	-	A	-	G	G	C	T	T	C	G	T	G	G	G	G	G	-	-
GUI HUA ZAO::IRGC 68060-1::[IRIS 313-10179]	IRIS 313-10179	IRGC 125755	indx	1	C	GUI HUA ZAO::IRGC 68060-1::[IRIS 313-10179]	IRIS 313-10179	IRGC 125755	indx	29	C	T	T	-	-	-	C	C	C	T	C	-	-	-	-	A	A	G	C	T	T	-	A	-	G	G	C	T	T	C	G	T	G	G	G	G	T	T	T
DA NUO (ZHAN)::IRGC 72025-1::[IRIS 313-10189]	IRIS 313-10189	IRGC 125723	ind1A	1	C	DA NUO (ZHAN)::IRGC 72025-1::[IRIS 313-10189]	IRIS 313-10189	IRGC 125723	ind1A	18	C	T	T	-	-	-	C	C	C	T	C	-	-	-	-	A	A	G	C	T	T	-	A	-	G	G	C	T	T	C	G	T	G	G	G	G	T	T	T
BAI HE::IRGC 76438-1::[IRIS 313-10211]	IRIS 313-10211	IRGC 125669	ind1A	1	C	BAI HE::IRGC 76438-1::[IRIS 313-10211]	IRIS 313-10211	IRGC 125669	ind1A	19	C	T	T	-	-	-	C	C	C	T	C	-	-	-	-	A	A	G	C	T	T	-	A	-	G	G	C	T	T	C	G	T	G	G	G	G	G	-	-
HUA LI ZAO::IRGC 80950-1::[IRIS 313-10224]	IRIS 313-10224	IRGC 125766	ind1A	1	C	HUA LI ZAO::IRGC 80950-1::[IRIS 313-10224]	IRIS 313-10224	IRGC 125766	ind1A	9	C	T	T	-	-	-	C	C	C	T	C	-	-	-	-	A	A	G	C	T	T	-	A	-	G	G	C	T	T	C	G	T	G	G	G	G	G	-	-
TONG GU HONG::IRGC 81026-1::[IRIS 313-10226]	IRIS 313-10226	IRGC 125925	indx	1	C	TONG GU HONG::IRGC 81026-1::[IRIS 313-10226]	IRIS 313-10226	IRGC 125925	indx	18	C	T	T	-	-	-	C	C	C	T	C	-	-	-	-	A	A	G	C	T	T	-	A	-	G	G	C	T	T	C	G	T	G	G	G	G	G	-	-
LIU XU::IRGC 109232-1::[IRIS 313-10239]	IRIS 313-10239	IRGC 125827	indx	1	C	LIU XU::IRGC 109232-1::[IRIS 313-10239]	IRIS 313-10239	IRGC 125827	indx	21	C	T	T	-	-	-	C	C	C	T	C	-	-	-	-	A	A	G	C	T	T	-	A	-	G	G	C	T	T	C	G	T	G	G	G	G	T	T	T
CUYAMEL 3820::IRGC 116975-1::[IRIS 313-10263]	IRIS 313-10263	IRGC 125961	indx	1	C	CUYAMEL 3820::IRGC 116975-1::[IRIS 313-10263]	IRIS 313-10263	IRGC 125961	indx	28	C	T	T	-	-	-	C	C	C	T	C	-	-	-	-	C	-	G	C	T	T	-	A	-	G	G	C	T	T	C	G	T	G	G	G	G	T	T	T
ICTA MOTAGUA::IRGC 116995-1::[IRIS 313-10275]	IRIS 313-10275	IRGC 125968	indx	1	C	ICTA MOTAGUA::IRGC 116995-1::[IRIS 313-10275]	IRIS 313-10275	IRGC 125968	indx	17	C	T	T	-	-	-	C	C	C	T	C	-	-	-	-	A	A	G	C	T	T	-	A	-	G	G	C	T	T	C	G	T	G	G	G	G	T	T	T
SICAN::IRGC 117029-1::[IRIS 313-10285]	IRIS 313-10285	IRGC 121119	indx	1	C	SICAN::IRGC 117029-1::[IRIS 313-10285]	IRIS 313-10285	IRGC 121119	indx	22	C	T	T	-	-	-	C	C	C	T	C	-	-	-	-	C	-	G	C	T	T	-	A	-	G	G	C	T	T	C	G	T	G	G	G	G	T	T	T
IR 21015-72-3-3-3-1::IRGC 117004-1::[IRIS 313-10294]	IRIS 313-10294	IRGC 125972	indx	1	C	IR 21015-72-3-3-3-1::IRGC 117004-1::[IRIS 313-10294]	IRIS 313-10294	IRGC 125972	indx	7	C	T	T	-	-	-	C	C	C	T	C	-	-	-	-	C	-	G	C	T	T	-	A	-	G	G	C	T	T	C	G	T	G	G	G	G	G	-	-
3210::IRGC 116950-1::[IRIS 313-10298]	IRIS 313-10298	IRGC 127030	ind1B	1	C	3210::IRGC 116950-1::[IRIS 313-10298]	IRIS 313-10298	IRGC 127030	ind1B	18	C	T	T	-	-	-	C	C	C	T	C	-	-	-	-	A	A	G	C	T	T	-	A	-	G	G	C	T	T	C	G	T	G	G	G	G	T	T	T
CSR-90 IR-2::IRGC 117327-1::[IRIS 313-10349]	IRIS 313-10349	IRGC 120921	indx	1	C	CSR-90 IR-2::IRGC 117327-1::[IRIS 313-10349]	IRIS 313-10349	IRGC 120921	indx	12	C	T	T	-	-	-	C	C	C	T	C	-	-	-	-	A	A	G	C	T	T	-	A	-	G	G	C	T	T	C	G	T	G	G	G	G	G	-	-
IR 31142-14-1-1-3-1-1-2::IRGC 117378-1::[IRIS 313-10355]	IRIS 313-10355	IRGC 126023	indx	1	C	IR 31142-14-1-1-3-1-1-2::IRGC 117378-1::[IRIS 313-10355]	IRIS 313-10355	IRGC 126023	indx	16	C	T	T	-	-	-	C	C	C	T	C	-	-	-	-	C	-	G	C	T	T	-	A	-	G	G	C	T	T	C	G	T	G	G	G	G	G	-	-
IR 53650-2B-10-1-2-1::IRGC 117379-1::[IRIS 313-10359]	IRIS 313-10359	IRGC 125973	indx	1	C	IR 53650-2B-10-1-2-1::IRGC 117379-1::[IRIS 313-10359]	IRIS 313-10359	IRGC 125973	indx	15	C	T	T	-	-	-	C	C	C	T	C	-	-	-	-	A	A	G	C	T	T	-	A	-	G	G	C	T	T	C	G	T	G	G	G	G	G	-	-
IR 57514-PMI 5-B-1-2::IRGC 117372-1::[IRIS 313-10360]	IRIS 313-10360	IRGC 126025	indx	1	C	IR 57514-PMI 5-B-1-2::IRGC 117372-1::[IRIS 313-10360]	IRIS 313-10360	IRGC 126025	indx	11	C	T	T	-	-	-	C	C	C	T	C	-	-	-	-	C	-	G	C	T	T	-	A	-	G	G	C	T	T	C	G	T	G	G	G	G	T	T	T
IR 65483-111-5-9-2-11::IRGC 117286-1::[IRIS 313-10366]	IRIS 313-10366	IRGC 125976	indx	1	C	IR 65483-111-5-9-2-11::IRGC 117286-1::[IRIS 313-10366]	IRIS 313-10366	IRGC 125976	indx	23	C	T	T	-	-	-	C	C	C	T	C	-	-	-	-	A	A	G	C	T	T	-	A	-	G	G	C	T	T	C	G	T	G	G	G	G	T	T	T
IR 67518-B-11-1-B::IRGC 117380-1::[IRIS 313-10371]	IRIS 313-10371	IRGC 126026	indx	1	C	IR 67518-B-11-1-B::IRGC 117380-1::[IRIS 313-10371]	IRIS 313-10371	IRGC 126026	indx	28	C	T	T	-	-	-	C	C	C	T	C	-	-	-	-	A	A	G	C	T	T	-	A	-	G	G	C	T	T	C	G	T	G	G	G	G	T	T	T
IR 69502-6-SRN-3-UBN-1-B::IRGC 117290-1::[IRIS 313-10374]	IRIS 313-10374	IRGC 125979	indx	1	C	IR 69502-6-SRN-3-UBN-1-B::IRGC 117290-1::[IRIS 313-10374]	IRIS 313-10374	IRGC 125979	indx	17	C	T	T	-	-	-	C	C	C	T	C	-	-	-	-	C	-	G	C	T	T	-	A	-	G	G	C	T	T	C	G	T	G	G	G	G	T	T	T
IR 70027-8-2-2-3-2::IRGC 117382-1::[IRIS 313-10375]	IRIS 313-10375	IRGC 126028	indx	1	C	IR 70027-8-2-2-3-2::IRGC 117382-1::[IRIS 313-10375]	IRIS 313-10375	IRGC 126028	indx	11	C	T	T	-	-	-	C	C	C	T	C	-	-	-	-	C	-	G	C	T	T	-			G	G	C	T	T	C	G	T	G	G	G	G	T	T	T
WAR 87-7-A10-2-B-B-B-1::IRGC 117362-1::[IRIS 313-10422]	IRIS 313-10422		indx	1	C	WAR 87-7-A10-2-B-B-B-1::IRGC 117362-1::[IRIS 313-10422]	IRIS 313-10422		indx	9	C	T	T	-	-	-	C	C	C	T	C	-	-	-	-	C	-	G	C	T	T	-	A	-	G	G	C	T	T	C	G	T	G	G	G	G	G	-	-
SERAUP 50::IRGC 14-1::[IRIS 313-10428]	IRIS 313-10428		ind3	1	C	SERAUP 50::IRGC 14-1::[IRIS 313-10428]	IRIS 313-10428		ind3	19	C	T	T	-	-	-	C	C	C	T	C	-	-	-	-	A	A	G	C	T	T	-	A	-	G	G	C	T	T	C	G	T	G	G	G	G	G	-	-
TP MIL 53::IRGC 326-2::[IRIS 313-10433]	IRIS 313-10433	IRGC 128193	indx	1	C	TP MIL 53::IRGC 326-2::[IRIS 313-10433]	IRIS 313-10433	IRGC 128193	indx	10	C	T	T	-	-	-	C	C	C	T	C	-	-	-	-	C	-	G	C	T	T	-	A	-	G	G	C	T	T	C	G	T	G	G	G	G	G	-	-
BINOLAYANGUN::IRGC 791-2::[IRIS 313-10448]	IRIS 313-10448	IRGC 127996	ind3	1	C	BINOLAYANGUN::IRGC 791-2::[IRIS 313-10448]	IRIS 313-10448	IRGC 127996	ind3	15	C	T	T	-	-	-	C	C	C	T	C	-	-	-	-	C	-	G	C	T	T	-	A	-	G	G	C	T	T	C	G	T	G	G	G	G	G	-	-
PULUT NANGKA 16::IRGC 3630-2::[IRIS 313-10480]	IRIS 313-10480	IRGC 132365	indx	1	C	PULUT NANGKA 16::IRGC 3630-2::[IRIS 313-10480]	IRIS 313-10480	IRGC 132365	indx	29	C	T	T	-	-	-	C	C	C	T	C	-	-	-	-	A	A	G	C	T	T	-	A	-	G	G	C	T	T	C	G	T	G	G	G	G	T	T	T
HA GOO::IRGC 4577-1::[IRIS 313-10503]	IRIS 313-10503	IRGC 127398	ind1A	1	C	HA GOO::IRGC 4577-1::[IRIS 313-10503]	IRIS 313-10503	IRGC 127398	ind1A	29	C	T	T	-	-	-	C	C	C	T	C	-	-	-	-	A	A	G	C	T	T	-	A	-	G	G	C	T	T	C	G	T	G	G	G	G	T	T	-
HSIEH DAU::IRGC 4727-1::[IRIS 313-10504]	IRIS 313-10504	IRGC 127419	ind1A	1	C	HSIEH DAU::IRGC 4727-1::[IRIS 313-10504]	IRIS 313-10504	IRGC 127419	ind1A	17	C	T	T	-	-	-	C	C	C	T	C	-	-	-	-	C	-	G	C	T	T	-	A	-	G	G	C	T	T	C	G	T	G	G	G	G	G	-	-
MACAN SAPAC::IRGC 5212-2::[IRIS 313-10511]	IRIS 313-10511	IRGC 128101	ind3	1	C	MACAN SAPAC::IRGC 5212-2::[IRIS 313-10511]	IRIS 313-10511	IRGC 128101	ind3	37	C	T	T	-	-	-	C	C	C	T	C	-	-	-	-	A	A	G	C	T	T	-	A	-	G	G	C	T	T	C	G	T	G	G	G	G	T	T	T
O. SATIVA::IRGC 5779-1::[IRIS 313-10516]	IRIS 313-10516	IRGC 127689	indx	1	C	O. SATIVA::IRGC 5779-1::[IRIS 313-10516]	IRIS 313-10516	IRGC 127689	indx	19	C	T	T	-	-	-	C	C	C	T	C	-	-	-	-	A	A	G	C	T	T	-	A	-	G	G	C	T	T	C	G	T	G	G	G	G	T	T	T
SIPOT::IRGC 5825-1::[IRIS 313-10517]	IRIS 313-10517	IRGC 127812	ind3	1	C	SIPOT::IRGC 5825-1::[IRIS 313-10517]	IRIS 313-10517	IRGC 127812	ind3	17	C	T	T	-	-	-	C	C	C	T	C	-	-	-	-	A	A	G	C	T	T	-	A	-	G	G	C	T	T	C	G	T	G	G	G	G	G	-	-
PTB 18::IRGC 6105-1::[IRIS 313-10523]	IRIS 313-10523	IRGC 135786	indx	1	C	PTB 18::IRGC 6105-1::[IRIS 313-10523]	IRIS 313-10523	IRGC 135786	indx	9	C	T	T	-	-	-	C	C	C	T	C	-	-	-	-	C	-	G	C	T	T	-	A	-	G	G	C	T	T	C	G	T	G	G	G	G	G	-	-
KHAO BAI SRI::IRGC 6110-2::[IRIS 313-10524]	IRIS 313-10524		ind3	1	C	KHAO BAI SRI::IRGC 6110-2::[IRIS 313-10524]	IRIS 313-10524		ind3	29	C	T	T	-	-	-	C	C	C	T	C	-	-	-	-	A	A	G	C	T	T	-	A	-	G	G	C	T	T	C	G	T	G	G	G	G	T	T	T
BANDANG PUTIH 680::IRGC 6133-2::[IRIS 313-10525]	IRIS 313-10525	IRGC 132246	ind3	1	C	BANDANG PUTIH 680::IRGC 6133-2::[IRIS 313-10525]	IRIS 313-10525	IRGC 132246	ind3	25	C	T	T	-	-	-	C	C	C	T	C	-	-	-	-	C	-	G	C	T	T	-	A	-	G	G	C	T	T	C	G	T	G	G	G	G	G	-	-
GAMTI 1-34::IRGC 6479-2::[IRIS 313-10536]	IRIS 313-10536	IRGC 128041	ind2	1	C	GAMTI 1-34::IRGC 6479-2::[IRIS 313-10536]	IRIS 313-10536	IRGC 128041	ind2	16	C	T	T	-	-	-	C	C	C	T	C	-	-	-	-	C	-	G	C	T	T	-	A	-	G	G	C	T	T	C	G	T	G	G	G	G	G	-	-
C 34-13::IRGC 6797-2::[IRIS 313-10547]	IRIS 313-10547	IRGC 128007	indx	1	C	C 34-13::IRGC 6797-2::[IRIS 313-10547]	IRIS 313-10547	IRGC 128007	indx	29	C	T	T	-	-	-	C	C	C	T	C	-	-	-	-	A	A	G	C	T	T	-	A	-	G	G	C	T	T	C	G	T	G	G	G	G	T	T	T
BONG SEN::IRGC 7011-1::[IRIS 313-10554]	IRIS 313-10554	IRGC 127235	ind3	1	C	BONG SEN::IRGC 7011-1::[IRIS 313-10554]	IRIS 313-10554	IRGC 127235	ind3	21	C	T	T	-	-	-	C	C	C	T	C	-	-	-	-	A	A	G	C	T	T	-	A	-	G	G	C	T	T	C	G	T	G	G	G	G	G	-	-
KONG MARETH 4 T 1::IRGC 7248-1::[IRIS 313-10557]	IRIS 313-10557	IRGC 135764	ind3	1	C	KONG MARETH 4 T 1::IRGC 7248-1::[IRIS 313-10557]	IRIS 313-10557	IRGC 135764	ind3	28	C	T	T	-	-	-	C	C	C	T	C	-	-	-	-	C	-	G	C	T	T	-	A	-	G	G	C	T	T	C	G	T	G	G	G	G	T	T	T
KAILUNDO::IRGC 7859-2::[IRIS 313-10574]	IRIS 313-10574	IRGC 132253	indx	1	C	KAILUNDO::IRGC 7859-2::[IRIS 313-10574]	IRIS 313-10574	IRGC 132253	indx	17	C	T	T	-	-	-	C	C	C	T	C	-	-	-	-	C	-	G	C	T	T	-	A	-	G	G	C	T	T	C	G	T	G	G	G	G	T	T	T
ALAGUSAMBA::IRGC 8944-2::[IRIS 313-10610]	IRIS 313-10610	IRGC 132315	ind2	1	C	ALAGUSAMBA::IRGC 8944-2::[IRIS 313-10610]	IRIS 313-10610	IRGC 132315	ind2	21	C	T	T	-	-	-	C	C	C	T	C	-	-	-	-	A	A	G	C	T	T	-	A	-	G	G	C	T	T	C	G	T	G	G	G	G	T	T	T
CHAO PEUAK DENG::IRGC 11602-1::[IRIS 313-10652]	IRIS 313-10652	IRGC 127268	ind3	1	C	CHAO PEUAK DENG::IRGC 11602-1::[IRIS 313-10652]	IRIS 313-10652	IRGC 127268	ind3	28	C	T	T	-	-	-	C	C	C	T	C	-	-	-	-	A	A	G	C	T	T	-	A	-	G	G	C	T	T	C	G	T	G	G	G	G	T	T	T
LONG MA::IRGC 11867-1::[IRIS 313-10659]	IRIS 313-10659	IRGC 127574	ind3	1	C	LONG MA::IRGC 11867-1::[IRIS 313-10659]	IRIS 313-10659	IRGC 127574	ind3	20	C	T	T	-	-	-	C	C	C	T	C	-	-	-	-	C	-	G	C	T	T	-	A	-	G	G	C	T	T	C	G	T	G		G	G	T	T	T
SAMBA::IRGC 11993-1::[IRIS 313-10661]	IRIS 313-10661	IRGC 127781	ind2	1	C	SAMBA::IRGC 11993-1::[IRIS 313-10661]	IRIS 313-10661	IRGC 127781	ind2	18	C	T	T	-	-	-	C	C	C	T	C	-	-	-	-	A	A	G	C	T	T	-	A	-	G	G	C	T	T	C	G	T	G	G	G	G	G	-	-
ARC 6052::IRGC 12196-1::[IRIS 313-10664]	IRIS 313-10664	IRGC 127163	ind2	1	C	ARC 6052::IRGC 12196-1::[IRIS 313-10664]	IRIS 313-10664	IRGC 127163	ind2	23	C	T	T	-	-	-	C	C	C	T	C	-	-	-	-	A	A	G	C	T	T	-	A	-	G	G	C	T	T	C	G	T	G	G	G	G	T	T	T
ARC 6218::IRGC 12255-1::[IRIS 313-10666]	IRIS 313-10666	IRGC 127164	indx	1	C	ARC 6218::IRGC 12255-1::[IRIS 313-10666]	IRIS 313-10666	IRGC 127164	indx	24	C	T	T	-	-	-	C	C	C	T	C	-	-	-	-	C	-	G	C	T	T	-	A	-	G	G	C	T	T	C	G	T	G	G	G	G	G	-	-
ARC 7255::IRGC 12343-2::[IRIS 313-10668]	IRIS 313-10668	IRGC 127974	indx	1	C	ARC 7255::IRGC 12343-2::[IRIS 313-10668]	IRIS 313-10668	IRGC 127974	indx	19	C	T	T	-	-	-	C	C	C	T	C	-	-	-	-	A	A	G	C	T	T	-	A	-	G	G	C	T	T	C	G	T	G	G	G	G	G	-	-
ARC 10846::IRGC 12656-2::[IRIS 313-10674]	IRIS 313-10674	IRGC 127932	indx	1	C	ARC 10846::IRGC 12656-2::[IRIS 313-10674]	IRIS 313-10674	IRGC 127932	indx	24	C	T	T	-	-	-	C	C	C	T	C	-	-	-	-	A	A	G	C	T	T	-	A	-	G	G	C	T	T	C	G	T	G	G	G	G	T	T	T
ARC 10905::IRGC 12669-1::[IRIS 313-10675]	IRIS 313-10675	IRGC 127132	indx	1	C	ARC 10905::IRGC 12669-1::[IRIS 313-10675]	IRIS 313-10675	IRGC 127132	indx	23	C	T	T	-	-	-	C	C	C	T	C	-	-	-	-	A	A	G	C	T	T	-	A	-	G	G	C	T	T	C	G	T	G	G	G	G	T	T	T
MAKALIOKA::IRGC 12781-2::[IRIS 313-10678]	IRIS 313-10678	IRGC 132353	ind2	1	C	MAKALIOKA::IRGC 12781-2::[IRIS 313-10678]	IRIS 313-10678	IRGC 132353	ind2	24	C	T	T	-	-	-	C	C	C	T	C	-	-	-	-			G	C	T	T	-	A	-	G	G	C	T	T	C	G	T	G	G	G	G	G	-	-
PA KHENG::IRGC 12996-1::[IRIS 313-10682]	IRIS 313-10682	IRGC 127707	ind3	1	C	PA KHENG::IRGC 12996-1::[IRIS 313-10682]	IRIS 313-10682	IRGC 127707	ind3	29	C	T	T	-	-	-	C	C	C	T	C	-	-	-	-	A	A	G	C	T	T	-	A	-	G	G	C	T	T	C	G	T	G	G	G	G	T	T	T
NGAN TIA::IRGC 13010-1::[IRIS 313-10683]	IRIS 313-10683	IRGC 127674	ind3	1	C	NGAN TIA::IRGC 13010-1::[IRIS 313-10683]	IRIS 313-10683	IRGC 127674	ind3	19	C	T	T	-	-	-	C	C	C	T	C	-	-	-	-	A	A	G	C	T	T	-	A	-	G	G	C	T	T	C	G	T	G	G	G	G	T	T	T
PADI PULUT::IRGC 13444-1::[IRIS 313-10687]	IRIS 313-10687		ind3	1	C	PADI PULUT::IRGC 13444-1::[IRIS 313-10687]	IRIS 313-10687		ind3	25	C	T	T	-	-	-	C	C	C	T	C	-	-	-	-	A	A	G	C	T	T	-	A	-	G	G	C	T	T	C	G	T	G	G	G	G	T	T	T
RADIN GOI::IRGC 13969-1::[IRIS 313-10698]	IRIS 313-10698	IRGC 127759	ind3	1	C	RADIN GOI::IRGC 13969-1::[IRIS 313-10698]	IRIS 313-10698	IRGC 127759	ind3	18	C	T	T	-	-	-	C	C	C	T	C	-	-	-	-	C	-	G	C	T	T	-	A	-	G	G	C	T	T	C	G	T	G	G	G	G	G	-	-
JAROM EMAS::IRGC 14272-1::[IRIS 313-10702]	IRIS 313-10702		ind3	1	C	JAROM EMAS::IRGC 14272-1::[IRIS 313-10702]	IRIS 313-10702		ind3	21	C	T	T	-	-	-	C	C	C	T	C	-	-	-	-	A	A	G	C	T	T	-	A	-	G	G	C	T	T	C	G	T	G	G	G	G	T	T	T
ANAK CHINA::IRGC 14479-1::[IRIS 313-10706]	IRIS 313-10706		ind3	1	C	ANAK CHINA::IRGC 14479-1::[IRIS 313-10706]	IRIS 313-10706		ind3	22	C	T	T	-	-	-	C	C	C	T	C	-	-	-	-	A	A	G	C	T	T	-	A	-	G	G	C	T	T	C	G	T	G	G	G	G	T	T	T
MOND BA::IRGC 15813-2::[IRIS 313-10723]	IRIS 313-10723	IRGC 128111	ind2	1	C	MOND BA::IRGC 15813-2::[IRIS 313-10723]	IRIS 313-10723	IRGC 128111	ind2	16	C	T	T	-	-	-	C	C	C	T	C	-	-	-	-	A	A	G	C	T	T	-	A	-	G	G	C	T	T	C	G	T	G	G	G	G	G	-	-
POTO BALA::IRGC 15986-2::[IRIS 313-10726]	IRIS 313-10726	IRGC 128139	ind3	1	C	POTO BALA::IRGC 15986-2::[IRIS 313-10726]	IRIS 313-10726	IRGC 128139	ind3	29	C	T	T	-	-	-	C	C	C	T	C	-	-	-	-	A	A	G	C	T	T	-	A	-	G	G	C	T	T	C	G	T	G	G	G	G	T	T	T
KOUPENEDOU KOUBOURY::IRGC 16011-1::[IRIS 313-10727]	IRIS 313-10727		ind3	1	C	KOUPENEDOU KOUBOURY::IRGC 16011-1::[IRIS 313-10727]	IRIS 313-10727		ind3	18	C	T	T	-	-	-	C	C	C	T	C	-	-	-	-	A	A	G	C	T	T	-	A	-	G	G	C	T	T	C	G	T	G	G	G	G	T	T	T
OUSSANTHIABA::IRGC 16046-2::[IRIS 313-10728]	IRIS 313-10728	IRGC 132261	indx	1	C	OUSSANTHIABA::IRGC 16046-2::[IRIS 313-10728]	IRIS 313-10728	IRGC 132261	indx	23	C	T	T	-	-	-	C	C	C	T	C	-	-	-	-	A	A	G	C	T			A	-	G	G	C	T	T	C	G	T	G	G	G	G	T	T	T
MADHUWA KARIA::IRGC 16138-2::[IRIS 313-10732]	IRIS 313-10732	IRGC 128102	aro	1	C	MADHUWA KARIA::IRGC 16138-2::[IRIS 313-10732]	IRIS 313-10732	IRGC 128102	aro	19	C	T	T	-	-	-	C	C	C	T	C	-	-	-	-	A	A	G	C	T	T	-	A	-	G	G	C	T	T	C	G	T	G	G	G	G	G	-	-
MOTANGE PAHELLO LAULE::IRGC 16160-1::[IRIS 313-10733]	IRIS 313-10733	IRGC 127634	indx	1	C	MOTANGE PAHELLO LAULE::IRGC 16160-1::[IRIS 313-10733]	IRIS 313-10733	IRGC 127634	indx	25	C	T	T	-	-	-	C	C	C	T	C	-	-	-	-	A	A	G	C	T	T	-	A	-	G	G	C	T	T	C	G	T	G	G	G	G	G	-	-
LUA DUC::IRGC 16718-1::[IRIS 313-10748]	IRIS 313-10748	IRGC 127578	indx	1	C	LUA DUC::IRGC 16718-1::[IRIS 313-10748]	IRIS 313-10748	IRGC 127578	indx	23	C	T	T	-	-	-	C	C	C	T	C	-	-	-	-	A	A	G	C	T	T	-	A	-	G	G	C	T	T	C	G	T	G	G	G	G	T	T	T
MINH SOC (CAMBODIA)::IRGC 16731-2::[IRIS 313-10749]	IRIS 313-10749		ind3	1	C	MINH SOC (CAMBODIA)::IRGC 16731-2::[IRIS 313-10749]	IRIS 313-10749		ind3	24	C	T	T	-	-	-	C	C	C	T	C	-	-	-	-	A	A	G	C	T	T	-	A	-	G	G	C	T	T	C	G	T	G	G	G	G	T	T	T
TRANG LUA::IRGC 16781-1::[IRIS 313-10750]	IRIS 313-10750	IRGC 135804	ind3	1	C	TRANG LUA::IRGC 16781-1::[IRIS 313-10750]	IRIS 313-10750	IRGC 135804	ind3	12	C	T	T	-	-	-	C	C	C	T	C	-	-	-	-	C	-	G	C	T	T	-	A	-	G	G	C	T	T	C	G	T	G	G	G	G	T	T	T
LUA CHUM::IRGC 16840-1::[IRIS 313-10751]	IRIS 313-10751	IRGC 127577	indx	1	C	LUA CHUM::IRGC 16840-1::[IRIS 313-10751]	IRIS 313-10751	IRGC 127577	indx	18	C	T	T	-	-	-	C	C	C	T	C	-	-	-	-	C	-	G	C	T	T	-	A	-	G	G	C	T	T	C	G	T	G	G	G	G	G	-	-
ATJEH::IRGC 17174-1::[IRIS 313-10760]	IRIS 313-10760		ind3	1	C	ATJEH::IRGC 17174-1::[IRIS 313-10760]	IRIS 313-10760		ind3	28	C	T	T	-	-	-	C	C	C	T	C	-	-	-	-	C	-	G	C	T	T	-	A	-	G	G	C	T	T	C	G	T	G	G	G	G	T	T	T
BANDI::IRGC 17214-1::[IRIS 313-10762]	IRIS 313-10762	IRGC 127207	ind3	1	C	BANDI::IRGC 17214-1::[IRIS 313-10762]	IRIS 313-10762	IRGC 127207	ind3	27	C	T	T	-	-	-	C	C	C	T	C	-	-	-	-	A	A	G	C	T	T	-	A	-	G	G	C	T	T	C	G	T	G	G	G	G	T	T	T
KETAN NARIS::IRGC 17925-2::[IRIS 313-10782]	IRIS 313-10782	IRGC 128078	ind3	1	C	KETAN NARIS::IRGC 17925-2::[IRIS 313-10782]	IRIS 313-10782	IRGC 128078	ind3	20	C	T	T	-	-	-	C	C	C	T	C	-	-	-	-	C	-	G	C	T	T	-	A	-	G	G	C	T	T	C	G	T	G	G	G	G	G	-	-
MANGSUR::IRGC 18187-1::[IRIS 313-10791]	IRIS 313-10791	IRGC 127602	ind3	1	C	MANGSUR::IRGC 18187-1::[IRIS 313-10791]	IRIS 313-10791	IRGC 127602	ind3	20	C	T	T	-	-	-	C	C	C	T	C	-	-	-	-	C	-	G	C	T	T	-	A	-	G	G	C	T	T	C	G	T	G	G	G	G	T	T	T
MELIK::IRGC 18238-2::[IRIS 313-10793]	IRIS 313-10793	IRGC 132257	trop	1	C	MELIK::IRGC 18238-2::[IRIS 313-10793]	IRIS 313-10793	IRGC 132257	trop	28	C	T	T	-	-	-	C	C	C	T	C	-	-	-	-	C	-	G	C	T	T	-	A	-	G	G	C	T	T	C	G	T	G	G	G	G	T	T	T
NARUN::IRGC 18320-2::[IRIS 313-10797]	IRIS 313-10797	IRGC 132357	ind3	1	C	NARUN::IRGC 18320-2::[IRIS 313-10797]	IRIS 313-10797	IRGC 132357	ind3	23	C	T	T	-	-	-	C	C	C	T	C	-	-	-	-	A	A	G	C	T	T	-	A	-	G	G	C	T	T	C	G	T	G	G	G	G	T	T	T
RADEN DJAWA (GUNDIL)::IRGC 18558-1::[IRIS 313-10806]	IRIS 313-10806	IRGC 135789	ind3	1	C	RADEN DJAWA (GUNDIL)::IRGC 18558-1::[IRIS 313-10806]	IRIS 313-10806	IRGC 135789	ind3	23	C	T	T	-	-	-	C	C	C	T	C	-	-	-	-	A	A	G	C	T	T	-	A	-	G	G	C	T	T	C	G	T	G	G	G	G	G	-	-
SIAM BARABAI::IRGC 18800-2::[IRIS 313-10813]	IRIS 313-10813		ind3	1	C	SIAM BARABAI::IRGC 18800-2::[IRIS 313-10813]	IRIS 313-10813		ind3	29	C	T	T	-	-	-	C	C	C	T	C	-	-	-	-	A	A	G	C	T	T	-	A	-	G	G	C	T	T	C	G	T	G	G	G	G	T	T	T
TJEMPO PENDEK UNTUNG::IRGC 19055-2::[IRIS 313-10818]	IRIS 313-10818	IRGC 128188	ind3	1	C	TJEMPO PENDEK UNTUNG::IRGC 19055-2::[IRIS 313-10818]	IRIS 313-10818	IRGC 128188	ind3	17	C	T	T	-	-	-	C	C	C	T	C	-	-	-	-	C	-	G	C	T	T	-	A	-	G	G	C	T	T	C	G	T	G	G	G	G
TJERE ENER::IRGC 19103-1::[IRIS 313-10819]	IRIS 313-10819	IRGC 127860	ind3	1	C	TJERE ENER::IRGC 19103-1::[IRIS 313-10819]	IRIS 313-10819	IRGC 127860	ind3	27	C	T	T	-	-	-	C	C	C	T	C	-	-	-	-	C	-	G	C	T	T	-	A	-	G	G	C	T	T	C	G	T	G	G	G	G	T	T	T
TJ PERAK::IRGC 19141-1::[IRIS 313-10821]	IRIS 313-10821	IRGC 127862	ind3	1	C	TJ PERAK::IRGC 19141-1::[IRIS 313-10821]	IRIS 313-10821	IRGC 127862	ind3	18	C	T	T	-	-	-	C	C	C	T	C	-	-	-	-			G	C	T	T	-	A	-	G	G	C	T	T	C	G	T	G	G	G	G	G	-	-
UTRI DELI::IRGC 19182-1::[IRIS 313-10823]	IRIS 313-10823	IRGC 127880	ind3	1	C	UTRI DELI::IRGC 19182-1::[IRIS 313-10823]	IRIS 313-10823	IRGC 127880	ind3	13	C	T	T	-	-	-	C	C	C	T	C	-	-	-	-	A	A	G	C	T	T	-	A	-	G	G	C	T	T	C	G	T	G	G	G	G	T	T	T
INDO NO 7505::IRGC 20162-2::[IRIS 313-10844]	IRIS 313-10844	IRGC 128058	ind3	1	C	INDO NO 7505::IRGC 20162-2::[IRIS 313-10844]	IRIS 313-10844	IRGC 128058	ind3	26	C	T	T	-	-	-	C	C	C	T	C	-	-	-	-	C	-	G	C	T	T	-	A	-	G	G	C	T	T	C	G	T	G	G	G	G	G	-	-
ARC 6015::IRGC 20314-2::[IRIS 313-10847]	IRIS 313-10847	IRGC 127972	indx	1	C	ARC 6015::IRGC 20314-2::[IRIS 313-10847]	IRIS 313-10847	IRGC 127972	indx	27	C	T	T	-	-	-	C	C	C	T	C	-	-	-	-	A	A	G	C	T	T	-	A	-	G	G	C	T	T	C	G	T	G	G	G	G	T	T	T
ARC 10159::IRGC 20754-2::[IRIS 313-10855]	IRIS 313-10855	IRGC 132316	ind2	1	C	ARC 10159::IRGC 20754-2::[IRIS 313-10855]	IRIS 313-10855	IRGC 132316	ind2	23	C	T	T	-	-	-	C	C	C	T	C	-	-	-	-	A	A	G	C	T	T	-	A	-	G	G	C	T	T	C	G	T	G	G	G	G	T	T	T
ARC 10894::IRGC 21122-1::[IRIS 313-10858]	IRIS 313-10858	IRGC 127131	indx	1	C	ARC 10894::IRGC 21122-1::[IRIS 313-10858]	IRIS 313-10858	IRGC 127131	indx	29	C	T	T	-	-	-	C	C	C	T	C	-	-	-	-	A	A	G	C	T	T	-	A	-	G	G	C	T	T	C	G	T	G	G	G	G	T	T	T
ARC 11571::IRGC 21487-2::[IRIS 313-10868]	IRIS 313-10868	IRGC 127939	aro	1	C	ARC 11571::IRGC 21487-2::[IRIS 313-10868]	IRIS 313-10868	IRGC 127939	aro	22	C	T	T	-	-	-	C	C	C	T	C	-	-	-	-	A	A	G	C	T	T	-	A	-	G	G	C	T	T	C	G	T	G	G	G	G	G	-	-
ARC 12559::IRGC 22148-2::[IRIS 313-10885]	IRIS 313-10885	IRGC 127942	indx	1	C	ARC 12559::IRGC 22148-2::[IRIS 313-10885]	IRIS 313-10885	IRGC 127942	indx	14	C	T	T	-	-	-	C	C	C	T	C	-	-	-	-	A	A	G	C	T	T	-	A	-	G	G	C	T	T	C	G	T	G	G	G	G	G	-	-
ARC 13373::IRGC 22691-1::[IRIS 313-10897]	IRIS 313-10897	IRGC 128227	ind3	1	C	ARC 13373::IRGC 22691-1::[IRIS 313-10897]	IRIS 313-10897	IRGC 128227	ind3	20	C	T	T	-	-	-	C	C	C	T	C	-	-	-	-	C	-	G	C	T	T	-	A	-	G	G	C	T	T	C	G	T	G	G	G	G	G	-	-
ANG KANG K P::IRGC 22716-2::[IRIS 313-10898]	IRIS 313-10898	IRGC 127928	ind3	1	C	ANG KANG K P::IRGC 22716-2::[IRIS 313-10898]	IRIS 313-10898	IRGC 127928	ind3	15	C	T	T	-	-	-	C	C	C	T	C	-	-	-	-	A	A	G	C	T	T	-	A	-	G	G	C	T	T	C	G	T	G	G	G	G	T	T	T
DAMNOEUB THPOIL HING::IRGC 22856-2::[IRIS 313-10901]	IRIS 313-10901	IRGC 128027	ind3	1	C	DAMNOEUB THPOIL HING::IRGC 22856-2::[IRIS 313-10901]	IRIS 313-10901	IRGC 128027	ind3	9	C	T	T	-	-	-	C	C	C	T	C	-	-	-	-	C	-	G	C	T	T	-	A	-	G	G	C	T	T	C	G	T	G	G	G	G	G	-	-
PHAT PRORMOL::IRGC 23143-1::[IRIS 313-10913]	IRIS 313-10913		ind3	1	C	PHAT PRORMOL::IRGC 23143-1::[IRIS 313-10913]	IRIS 313-10913		ind3	29	C	T	T	-	-	-	C	C	C	T	C	-	-	-	-	A	A	G	C	T	T	-	A	-	G	G	C	T	T	C	G	T	G	G	G	G	T	T	T
PHCAR SLA KI::IRGC 23169-2::[IRIS 313-10915]	IRIS 313-10915	IRGC 128133	ind3	1	C	PHCAR SLA KI::IRGC 23169-2::[IRIS 313-10915]	IRIS 313-10915	IRGC 128133	ind3	21	C	T	T	-	-	-	C	C	C	T	C	-	-	-	-	A	A	G	C	T	T	-	A	-	G	G	C	T	T	C	G	T	G	G	G	G	G	-	-
T Q QI HAYUQBABA::IRGC 23318-1::[IRIS 313-10917]	IRIS 313-10917	IRGC 128489	indx	1	C	T Q QI HAYUQBABA::IRGC 23318-1::[IRIS 313-10917]	IRIS 313-10917	IRGC 128489	indx	27	C	T	T	-	-	-	C	C	C	T	C	-	-	-	-	A	A	G	C	T	T	-	A	-	G	G	C	T	T	C	G	T	G	G	G	G	T	T	T
ATH HAGARI JARAHAN PADDY::IRGC 23796-1::[IRIS 313-10924]	IRIS 313-10924	IRGC 127176	indx	1	C	ATH HAGARI JARAHAN PADDY::IRGC 23796-1::[IRIS 313-10924]	IRIS 313-10924	IRGC 127176	indx	26	C	T	T	-	-	-	C	C	C	T	C	-	-	-	-	C	-	G	C	T	T	-	A	-	G	G	C	T	T	C	G	T	G	G	G	G	G	-	-
KOLONGI BAO::IRGC 24135-2::[IRIS 313-10929]	IRIS 313-10929	IRGC 128090	ind2	1	C	KOLONGI BAO::IRGC 24135-2::[IRIS 313-10929]	IRIS 313-10929	IRGC 128090	ind2	23	C	T	T	-	-	-	C	C	C	T	C	-	-	-	-	A	A	G	C	T	T	-	A	-	G	G	C	T	T	C	G	T	G	G	G	G	T	T	T
PULUT WAJIT::IRGC 24624-1::[IRIS 313-10937]	IRIS 313-10937	IRGC 135788	ind3	1	C	PULUT WAJIT::IRGC 24624-1::[IRIS 313-10937]	IRIS 313-10937	IRGC 135788	ind3	24	C	T	T	-	-	-	C	C	C	T	C	-	-	-	-	A	A	G	C	T	T	-	A	-	G	G	C	T	T	C	G	T	G	G	G	G	G	-	-
SITANDANG::IRGC 24681-1::[IRIS 313-10940]	IRIS 313-10940	IRGC 127814	ind3	1	C	SITANDANG::IRGC 24681-1::[IRIS 313-10940]	IRIS 313-10940	IRGC 127814	ind3	18	C	T	T	-	-	-	C	C	C	T	C	-	-	-	-	C	-	G	C	T	T	-	A	-	G	G	C	T	T	C	G	T	G	G	G	G	G	-	-
SIPULUT SUBANG::IRGC 24824-2::[IRIS 313-10944]	IRIS 313-10944	IRGC 132269	ind3	1	C	SIPULUT SUBANG::IRGC 24824-2::[IRIS 313-10944]	IRIS 313-10944	IRGC 132269	ind3	26	C	T	T	-	-	-	C	C	C	T	C	-	-	-	-	A	A	G	C	T	T	-	A	-	G	G	C	T	T	C	G	T	G	G	G	G	T	T	T
ASE PULU BOLONG::IRGC 25171-1::[IRIS 313-10950]	IRIS 313-10950	IRGC 127174	trop	1	C	ASE PULU BOLONG::IRGC 25171-1::[IRIS 313-10950]	IRIS 313-10950	IRGC 127174	trop	16	C	T	T	-	-	-	C	C	C	T	C	-	-	-	-	C	-	G	C	T	T	-	A	-	G	G	C	T	T	C	G	T	G	G	G	G	G	-	-
PADI PUYUH::IRGC 25532-1::[IRIS 313-10955]	IRIS 313-10955	IRGC 127702	ind3	1	C	PADI PUYUH::IRGC 25532-1::[IRIS 313-10955]	IRIS 313-10955	IRGC 127702	ind3	27	C	T	T	-	-	-	C	C	C	T	C	-	-	-	-	A	A	G	C	T	T	-	A	-	G	G	C	T	T	C	G	T	G	G	G	G	G	-	-
HURANG ARISO LUTA::IRGC 26055-1::[IRIS 313-10966]	IRIS 313-10966	IRGC 127424	indx	1	C	HURANG ARISO LUTA::IRGC 26055-1::[IRIS 313-10966]	IRIS 313-10966	IRGC 127424	indx	19	C	T	T	-	-	-	C	C	C	T	C	-	-	-	-	A	A	G	C	T	T	-	A	-	G	G	C	T	T	C	G	T	G	G	G	G	G	-	-
IH PEN SHIM MING::IRGC 26067-1::[IRIS 313-10968]	IRIS 313-10968	IRGC 127428	ind1A	1	C	IH PEN SHIM MING::IRGC 26067-1::[IRIS 313-10968]	IRIS 313-10968	IRGC 127428	ind1A	27	C	T	T	-	-	-	C	C	C	T	C	-	-	-	-	A	A	G	C	T	T	-	A	-	G	G	C	T	T	C	G	T	G	G	G	G	G	-	-
NANG SAU DO::IRGC 26243-1::[IRIS 313-10970]	IRIS 313-10970		ind3	1	C	NANG SAU DO::IRGC 26243-1::[IRIS 313-10970]	IRIS 313-10970		ind3	20	C	T	T	-	-	-	C	C	C	T	C	-	-	-	-	C	-	G	C	T	T	-	A	-	G	G	C	T	T	C	G	T	G	G	G	G	T	T	T
KALA DIGHA::IRGC 26367-2::[IRIS 313-10973]	IRIS 313-10973	IRGC 128064	ind2	1	C	KALA DIGHA::IRGC 26367-2::[IRIS 313-10973]	IRIS 313-10973	IRGC 128064	ind2	20	C	T	T	-	-	-	C	C	C	T	C	-	-	-	-	C	-	G	C	T	T	-	A	-	G	G	C	T	T	C	G	T	G	G	G	G	G	-	-
MATI CHAL::IRGC 26399-2::[IRIS 313-10977]	IRIS 313-10977	IRGC 128107	ind2	1	C	MATI CHAL::IRGC 26399-2::[IRIS 313-10977]	IRIS 313-10977	IRGC 128107	ind2	18	C	T	T	-	-	-	C	C	C	T	C	-	-	-	-	A	A	G	C	T	T	-	A	-	G	G	C	T	T	C	G	T	G	G	G	G	G	-	-
DUDHSAR::IRGC 26458-1::[IRIS 313-10980]	IRIS 313-10980	IRGC 127344	admix	1	C	DUDHSAR::IRGC 26458-1::[IRIS 313-10980]	IRIS 313-10980	IRGC 127344	admix	27	C	T	T	-	-	-	C	C	C	T	C	-	-	-	-	A	A	G	C	T	T	-	A	-	G	G	C	T	T	C	G	T	G	G	G	G	G	-	-
BOROJYOT::IRGC 26578-2::[IRIS 313-10983]	IRIS 313-10983	IRGC 128000	indx	1	C	BOROJYOT::IRGC 26578-2::[IRIS 313-10983]	IRIS 313-10983	IRGC 128000	indx	8	C	T	T	-	-	-	C	C	C	T	C	-	-	-	-	C	-	G	C	T	T	-	A	-	G	G	C	T	T	C	G	T	G	G	G	G
GOBOL SAIL (BALAM)::IRGC 26624-2::[IRIS 313-10985]	IRIS 313-10985	IRGC 132424	ind2	1	C	GOBOL SAIL (BALAM)::IRGC 26624-2::[IRIS 313-10985]	IRIS 313-10985	IRGC 132424	ind2	9	C	T	T	-	-	-	C	C	C	T	C	-	-	-	-	C	-	G	C	T	T	-	A	-	G	G	C	T	T	C	G	T	G	G	G	G	G	-	-
GUTTI AKKULLU::IRGC 26850-2::[IRIS 313-10989]	IRIS 313-10989	IRGC 128046	ind2	1	C	GUTTI AKKULLU::IRGC 26850-2::[IRIS 313-10989]	IRIS 313-10989	IRGC 128046	ind2	25	C	T	T	-	-	-	C	C	C	T	C	-	-	-	-	C	-	G	C	T	T	-	A	-	G	G	C	T	T	C	G	T	G	G	G	G	T	T	T
BALIBUD::IRGC 26871-1::[IRIS 313-10990]	IRIS 313-10990	IRGC 127206	indx	1	C	BALIBUD::IRGC 26871-1::[IRIS 313-10990]	IRIS 313-10990	IRGC 127206	indx	24	C	T	T	-	-	-	C	C	C	T	C	-	-	-	-	A	A	G	C	T	T	-	A	-	G	G	C	T	T	C	G	T	G	G	G	G	T	T	T
PULU LOTONG::IRGC 27380-2::[IRIS 313-11005]	IRIS 313-11005	IRGC 128140	trop	1	C	PULU LOTONG::IRGC 27380-2::[IRIS 313-11005]	IRIS 313-11005	IRGC 128140	trop	27	C	T	T	-	-	-	C	C	C	T	C	-	-	-	-	A	A	G	C	T	T	-	A	-	G	G	C	T	T	C	G	T	G	G	G	G	G	-	-
PULU RENNI::IRGC 27386-1::[IRIS 313-11006]	IRIS 313-11006	IRGC 127747	ind3	1	C	PULU RENNI::IRGC 27386-1::[IRIS 313-11006]	IRIS 313-11006	IRGC 127747	ind3	14	C	T	T	-	-	-	C	C	C	T	C	-	-	-	-	C	-	G	C	T	T	-	A	-	G	G	C	T	T	C	G	T	G	G	G	G	T	T	T
PULUT PUTIH::IRGC 27426-1::[IRIS 313-11010]	IRIS 313-11010	IRGC 127750	ind3	1	C	PULUT PUTIH::IRGC 27426-1::[IRIS 313-11010]	IRIS 313-11010	IRGC 127750	ind3	18	C	T	T	-	-	-	C	C	C	T	C	-	-	-	-	A	A	G	C	T	T	-	A	-	G	G	C	T	T	C	G	T	G	G	G	G	G	-	-
SUNAR::IRGC 27470-1::[IRIS 313-11011]	IRIS 313-11011	IRGC 127830	indx	1	C	SUNAR::IRGC 27470-1::[IRIS 313-11011]	IRIS 313-11011	IRGC 127830	indx	17	C	T	T	-	-	-	C	C	C	T	C	-	-	-	-	A	A	G	C	T	T	-	A	-	G	G	C	T	T	C	G	T	G	G	G	G	G	-	-
HANSRAJ::IRGC 27936-2::[IRIS 313-11026]	IRIS 313-11026	IRGC 132336	aro	1	C	HANSRAJ::IRGC 27936-2::[IRIS 313-11026]	IRIS 313-11026	IRGC 132336	aro	13	C	T	T	-	-	-	C	C	C	T	C	-	-	-	-	A	A	G	C	T	T	-	A	-	G	G	C	T	T	C	G	T	G	G	G	G	G	-	-
KAVIVARI SAMBA::IRGC 28597-2::[IRIS 313-11040]	IRIS 313-11040		indx	1	C	KAVIVARI SAMBA::IRGC 28597-2::[IRIS 313-11040]	IRIS 313-11040		indx	31	C	T	T	-	-	-	C	C	C	T	C	-	-	-	-	A	A	G	C	T	T	-	A	-	G	G	C	T	T	C	G	T	G	G	G	G	T	T	T
CHAO HAI::IRGC 29450-2::[IRIS 313-11071]	IRIS 313-11071	IRGC 128011	indx	1	C	CHAO HAI::IRGC 29450-2::[IRIS 313-11071]	IRIS 313-11071	IRGC 128011	indx	27	C	T	T	-	-	-	C	C	C	T	C	-	-	-	-	A	A	G	C	T	T	-	A	-	G	G	C	T	T	C	G	T	G	G	G	G	G	-	-
PHAN PHAE::IRGC 29652-2::[IRIS 313-11079]	IRIS 313-11079	IRGC 128132	ind3	1	C	PHAN PHAE::IRGC 29652-2::[IRIS 313-11079]	IRIS 313-11079	IRGC 128132	ind3	29	C	T	T	-	-	-	C	C	C	T	C	-	-	-	-	A	A	G	C	T	T	-	A	-	G	G	C	T	T	C	G	T	G	G	G	G	T	T	T
EA TIA::IRGC 29713-2::[IRIS 313-11083]	IRIS 313-11083	IRGC 132248	ind3	1	C	EA TIA::IRGC 29713-2::[IRIS 313-11083]	IRIS 313-11083	IRGC 132248	ind3	37	C	T	T	-	-	-	C	C	C	T	C	-	-	-	-	A	A	G	C	T	T	-	A	-	G	G	C	T	T	C	G	T	G	G	G	G	T	T	T
KABIN::IRGC 29752-1::[IRIS 313-11084]	IRIS 313-11084		ind3	1	C	KABIN::IRGC 29752-1::[IRIS 313-11084]	IRIS 313-11084		ind3	9	C	T	T	-	-	-	C	C	C	T	C	-	-	-	-	C	-	G	C	T	T	-	A	-	G	G	C	T	T	C	G	T	G	G	G	G	G	-	-
PONG SANG A::IRGC 29881-2::[IRIS 313-11087]	IRIS 313-11087		ind3	1	C	PONG SANG A::IRGC 29881-2::[IRIS 313-11087]	IRIS 313-11087		ind3	17	C	T	T	-	-	-	C	C	C	T	C	-	-	-	-	C	-	G	C	T	T	-	A	-	G	G	C	T	T	C	G	T	G	G	G	G	G	-	-
SRAU THMOR::IRGC 29904-1::[IRIS 313-11089]	IRIS 313-11089	IRGC 127824	ind3	1	C	SRAU THMOR::IRGC 29904-1::[IRIS 313-11089]	IRIS 313-11089	IRGC 127824	ind3	29	C	T	T	-	-	-	C	C	C	T	C	-	-	-	-	A	A	G	C	T	T	-	A	-	G	G	C	T	T	C	G	T	G	G	G	G	T	T	T
PECALO::IRGC 30595-2::[IRIS 313-11099]	IRIS 313-11099		ind2	1	C	PECALO::IRGC 30595-2::[IRIS 313-11099]	IRIS 313-11099		ind2	20	C	T	T	-	-	-	C	C	C	T	C	-	-	-	-	C	-	G	C	T	T	-	A	-	G	G	C	T	T	C	G	T	G	G	G	G	G	-	-
Y 115::IRGC 30856-2::[IRIS 313-11101]	IRIS 313-11101	IRGC 128202	indx	1	C	Y 115::IRGC 30856-2::[IRIS 313-11101]	IRIS 313-11101	IRGC 128202	indx	24	C	T	T	-	-	-	C	C	C	T	C	-	-	-	-	C	-	G	C	T	T	-	A	-	G	G	C	T	T	C	G	T	G	G	G	G	G	-	-
HIJOL DIGA::IRGC 31655-1::[IRIS 313-11112]	IRIS 313-11112	IRGC 128308	aus	1	C	HIJOL DIGA::IRGC 31655-1::[IRIS 313-11112]	IRIS 313-11112	IRGC 128308	aus	29	C	T	T	-	-	-	C	C	C	T	C	-	-	-	-	A	A	G	C	T	T	-	A	-	G	G	C	T	T	C	G	T	G	G	G	G	T	T	T
SOC NAU (BIEN THE)::IRGC 32074-1::[IRIS 313-11118]	IRIS 313-11118	IRGC 135797	ind3	1	C	SOC NAU (BIEN THE)::IRGC 32074-1::[IRIS 313-11118]	IRIS 313-11118	IRGC 135797	ind3	23	C	T	T	-	-	-	C	C	C	T	C	-	-	-	-	A	A	G	C	T	T	-	A	-	G	G	C	T	T	C	G	T	G	G	G	G	T	T	T
NEP BUNG::IRGC 32207-1::[IRIS 313-11119]	IRIS 313-11119		indx	1	C	NEP BUNG::IRGC 32207-1::[IRIS 313-11119]	IRIS 313-11119		indx	15	C	T	T	-	-	-	C	C	C	T	C	-	-	-	-	C	-	G	C	T	T	-	A	-	G	G	C	T	T	C	G	T	G	G	G	G	G	-	-
DHALA AMAN 973::IRGC 32861-1::[IRIS 313-11125]	IRIS 313-11125		admix	1	C	DHALA AMAN 973::IRGC 32861-1::[IRIS 313-11125]	IRIS 313-11125		admix	14	C	T	T	-	-	-	C	C	C	T	C	-	-	-	-	C	-	G	C	T	T	-	A	-	G	G	C	T	T	C	G	T	G	G	G	G	G	-	-
MAUNG NYO::IRGC 33351-2::[IRIS 313-11135]	IRIS 313-11135	IRGC 128108	ind3	1	C	MAUNG NYO::IRGC 33351-2::[IRIS 313-11135]	IRIS 313-11135	IRGC 128108	ind3	28	C	T	T	-	-	-	C	C	C	T	C	-	-	-	-	C	-	G	C	T	T	-	A	-	G	G	C	T	T	C	G	T	G	G	G	G	T	T	T
NGALONGYI::IRGC 33479-2::[IRIS 313-11137]	IRIS 313-11137	IRGC 128118	indx	1	C	NGALONGYI::IRGC 33479-2::[IRIS 313-11137]	IRIS 313-11137	IRGC 128118	indx	15	C	T	T	-	-	-	C	C	C	T	C	-	-	-	-	C	-	G	C	T	T	-	A	-	G	G	C	T	T	C	G	T	G	G	G	G	T	T	T
PADAN::IRGC 33544-2::[IRIS 313-11140]	IRIS 313-11140	IRGC 128123	ind3	1	C	PADAN::IRGC 33544-2::[IRIS 313-11140]	IRIS 313-11140	IRGC 128123	ind3	14	C	T	T	-	-	-	C	C	C	T	C	-	-	-	-	C	-	G	C	T	T	-	A	-	G	G	C	T	T	C	G	T	G	G	G	G	T	T	T
SHWENI::IRGC 33686-2::[IRIS 313-11141]	IRIS 313-11141	IRGC 128161	indx	1	C	SHWENI::IRGC 33686-2::[IRIS 313-11141]	IRIS 313-11141	IRGC 128161	indx	17	C	T	T	-	-	-	C	C	C	T	C	-	-	-	-	C	-	G	C	T	T	-	A	-	G	G	C	T	T	C	G	T	G	G	G	G
TANBAUNG::IRGC 33732-2::[IRIS 313-11143]	IRIS 313-11143	IRGC 128180	indx	1	C	TANBAUNG::IRGC 33732-2::[IRIS 313-11143]	IRIS 313-11143	IRGC 128180	indx	16	C	T	T	-	-	-	C	C	C	T	C	-	-	-	-	A	A	G	C	T	T	-	A	-	G	G	C	T	T	C	G	T	G	G	G	G	G	-	-
THAKADE THEEDAT::IRGC 33772-2::[IRIS 313-11145]	IRIS 313-11145	IRGC 128183	ind3	1	C	THAKADE THEEDAT::IRGC 33772-2::[IRIS 313-11145]	IRIS 313-11145	IRGC 128183	ind3	14	C	T	T	-	-	-	C	C	C	T	C	-	-	-	-	C	-	G	C	T	T	-	A	-	G	G	C	T	T	C	G	T	G	G	G	G	T	T	T
ZEINGYI::IRGC 33923-2::[IRIS 313-11150]	IRIS 313-11150	IRGC 128206	ind3	1	C	ZEINGYI::IRGC 33923-2::[IRIS 313-11150]	IRIS 313-11150	IRGC 128206	ind3	9	C	T	T	-	-	-	C	C	C	T	C	-	-	-	-	C	-	G	C	T	T	-	A	-	G	G	C	T	T	C	G	T	G	G	G	G	G	-	-
B 38::IRGC 34409-1::[IRIS 313-11160]	IRIS 313-11160	IRGC 127195	ind3	1	C	B 38::IRGC 34409-1::[IRIS 313-11160]	IRIS 313-11160	IRGC 127195	ind3	14	C	T	T	-	-	-	C	C	C	T	C	-	-	-	-	A	A	G	C	T	T	-	A	-	G	G	C	T	T	C	G	T	G	G	G	G	T	T	T
RUJAK DANAN::IRGC 35446-2::[IRIS 313-11178]	IRIS 313-11178	IRGC 128152	ind3	1	C	RUJAK DANAN::IRGC 35446-2::[IRIS 313-11178]	IRIS 313-11178	IRGC 128152	ind3	14	C	T	T	-	-	-	C	C	C	T	C	-	-	-	-	C	-	G	C	T	T	-	A	-	G	G	C	T	T	C	G	T	G	G	G	G	G	-	-
CEMPO CINA::IRGC 35581-2::[IRIS 313-11182]	IRIS 313-11182	IRGC 128009	ind3	1	C	CEMPO CINA::IRGC 35581-2::[IRIS 313-11182]	IRIS 313-11182	IRGC 128009	ind3	27	C	T	T	-	-	-	C	C	C	T	C	-	-	-	-	A	A	G	C	T	T	-	A	-	G	G	C	T	T	C	G	T	G	G	G	G	G	-	-
GAHB AWY 2-1::IRGC 36549-2::[IRIS 313-11193]	IRIS 313-11193	IRGC 128040	ind3	1	C	GAHB AWY 2-1::IRGC 36549-2::[IRIS 313-11193]	IRIS 313-11193	IRGC 128040	ind3	18	C	T	T	-	-	-	C	C	C	T	C	-	-	-	-	A	A	G	C	T	T	-	A	-	G	G	C	T	T	C	G	T	G	G	G	G	G	-	-
DICULA::IRGC 36729-2::[IRIS 313-11196]	IRIS 313-11196	IRGC 132333	ind3	1	C	DICULA::IRGC 36729-2::[IRIS 313-11196]	IRIS 313-11196	IRGC 132333	ind3	11	C	T	T	-	-	-	C	C	C	T	C	-	-	-	-	A	A	G	C	T	T	-	A	-	G	G	C	T	T	C	G	T	G	G	G	G	T	T	T
GOCHIAGARI::IRGC 37086-2::[IRIS 313-11203]	IRIS 313-11203	IRGC 128044	ind2	1	C	GOCHIAGARI::IRGC 37086-2::[IRIS 313-11203]	IRIS 313-11203	IRGC 128044	ind2	12	C	T	T	-	-	-	C	C	C	T	C	-	-	-	-	C	-	G	C	T	T	-	A	-	G	G	C	T	T	C	G	T	G	G	G	G	G	-	-
KAZALSAIL::IRGC 37161-2::[IRIS 313-11205]	IRIS 313-11205	IRGC 128075	ind2	1	C	KAZALSAIL::IRGC 37161-2::[IRIS 313-11205]	IRIS 313-11205	IRGC 128075	ind2	29	C	T	T	-	-	-	C	C	C	T	C	-	-	-	-	A	A	G	C	T	T	-	A	-	G	G	C	T	T	C	G	T	G	G	G	G	T	T	T
BLACK 28-564::IRGC 37815-2::[IRIS 313-11219]	IRIS 313-11219	IRGC 127998	ind2	1	C	BLACK 28-564::IRGC 37815-2::[IRIS 313-11219]	IRIS 313-11219	IRGC 127998	ind2	15	C	T	T	-	-	-	C	C	C	T	C	-	-	-	-	A	A	G	C	T	T	-	A	-	G	G	C	T	T	C	G	T	G	G	G	G	T	T	T
CHITRAJ 14-134::IRGC 37837-2::[IRIS 313-11220]	IRIS 313-11220	IRGC 128015	ind2	1	C	CHITRAJ 14-134::IRGC 37837-2::[IRIS 313-11220]	IRIS 313-11220	IRGC 128015	ind2	25	C	T	T	-	-	-	C	C	C	T	C	-	-	-	-	C	-	G	C	T	T	-	A	-	G	G	C	T	T	C	G	T	G	G	G	G
CYLINDRICAL 30-605::IRGC 37845-2::[IRIS 313-11221]	IRIS 313-11221	IRGC 128022	ind2	1	C	CYLINDRICAL 30-605::IRGC 37845-2::[IRIS 313-11221]	IRIS 313-11221	IRGC 128022	ind2	23	C	T	T	-	-	-	C	C	C	T	C	-	-	-	-	A	A	G	C	T	T	-	A	-	G	G	C	T	T	C	G	T	G	G	G	G	T	T	T
DUDHSWAR 15-157::IRGC 37967-2::[IRIS 313-11222]	IRIS 313-11222	IRGC 132308	ind2	1	C	DUDHSWAR 15-157::IRGC 37967-2::[IRIS 313-11222]	IRIS 313-11222	IRGC 132308	ind2	19	C	T	T	-	-	-	C	C	C	T	C	-	-	-	-	A	A	G	C	T	T	-	A	-	G	G	C	T	T	C				G			G	-	-
SADAJIRA (DEEP STRAW) 16-194::IRGC 38251-2::[IRIS 313-11225]	IRIS 313-11225	IRGC 132265	indx	1	C	SADAJIRA (DEEP STRAW) 16-194::IRGC 38251-2::[IRIS 313-11225]	IRIS 313-11225	IRGC 132265	indx	20	C	T	T	-	-	-	C	C	C	T	C	-	-	-	-	A	A	G	C	T	T	-	A	-	G	G	C	T	T	C	G	T	G	G	G	G	T	T	T
SADAJIRA 19-258::IRGC 38293-2::[IRIS 313-11226]	IRIS 313-11226	IRGC 128153	ind2	1	C	SADAJIRA 19-258::IRGC 38293-2::[IRIS 313-11226]	IRIS 313-11226	IRGC 128153	ind2	19	C	T	T	-	-	-	C	C	C	T	C	-	-	-	-	A	A	G	C	T	T	-	A	-	G	G	C	T	T	C	G	T	G	G	G	G	T	T	T
SADAJIRA 19-317::IRGC 38344-2::[IRIS 313-11227]	IRIS 313-11227	IRGC 128154	ind2	1	C	SADAJIRA 19-317::IRGC 38344-2::[IRIS 313-11227]	IRIS 313-11227	IRGC 128154	ind2	25	C	T	T	-	-	-	C	C	C	T	C	-	-	-	-	C	-	G	C	T	T	-	A	-	G	G	C	T	T	C	G	T	G	G	G	G	G	-	-
STRAW 23-428::IRGC 38416-2::[IRIS 313-11229]	IRIS 313-11229	IRGC 128171	ind2	1	C	STRAW 23-428::IRGC 38416-2::[IRIS 313-11229]	IRIS 313-11229	IRGC 128171	ind2	29	C	T	T	-	-	-	C	C	C	T	C	-	-	-	-	A	A	G	C	T	T	-	A	-	G	G	C	T	T	C	G	T	G	G	G	G	T	T	T
STRAW 23-438::IRGC 38426-2::[IRIS 313-11230]	IRIS 313-11230	IRGC 128172	ind2	1	C	STRAW 23-438::IRGC 38426-2::[IRIS 313-11230]	IRIS 313-11230	IRGC 128172	ind2	26	C	T	T	-	-	-	C	C	C	T	C	-	-	-	-	A	A	G	C	T	T	-	A	-	G	G	C	T	T	C	G	T	G	G	G	G	G	-	-
STRAW 23-471::IRGC 38456-1::[IRIS 313-11231]	IRIS 313-11231	IRGC 135799	ind2	1	C	STRAW 23-471::IRGC 38456-1::[IRIS 313-11231]	IRIS 313-11231	IRGC 135799	ind2	21	C	T	T	-	-	-	C	C	C	T	C	-	-	-	-	A	A	G	C	T	T	-	A	-	G	G	C	T	T	C	G	T	G	G	G	G
ARC 12411::IRGC 41047-2::[IRIS 313-11256]	IRIS 313-11256	IRGC 127941	indx	1	C	ARC 12411::IRGC 41047-2::[IRIS 313-11256]	IRIS 313-11256	IRGC 127941	indx	29	C	T	T	-	-	-	C	C	C	T	C	-	-	-	-	A	A	G	C	T	T	-	A	-	G	G	C	T	T	C	G	T	G	G	G	G	T	T	T
ARC 13934::IRGC 41325-2::[IRIS 313-11264]	IRIS 313-11264	IRGC 132241	indx	1	C	ARC 13934::IRGC 41325-2::[IRIS 313-11264]	IRIS 313-11264	IRGC 132241	indx	29	C	T	T	-	-	-	C	C	C	T	C	-	-	-	-	A	A	G	C	T	T	-	A	-	G	G	C	T	T	C	G	T	G	G	G	G	T	T	T
ARC 14358::IRGC 41523-2::[IRIS 313-11267]	IRIS 313-11267	IRGC 127956	ind2	1	C	ARC 14358::IRGC 41523-2::[IRIS 313-11267]	IRIS 313-11267	IRGC 127956	ind2	29	C	T	T	-	-	-	C	C	C	T	C	-	-	-	-	A	A	G	C	T	T	-	A	-	G	G	C	T	T	C	G	T	G	G	G	G	T	T	T
ARC 14975::IRGC 41848-1::[IRIS 313-11275]	IRIS 313-11275	IRGC 127156	indx	1	C	ARC 14975::IRGC 41848-1::[IRIS 313-11275]	IRIS 313-11275	IRGC 127156	indx	29	C	T	T	-	-	-	C	C	C	T	C	-	-	-	-	A	A	G	C	T	T	-	A	-	G	G	C	T	T	C	G	T	G	G	G	G	T	T	T
ARC 15129::IRGC 41938-1::[IRIS 313-11277]	IRIS 313-11277	IRGC 127157	aus	1	C	ARC 15129::IRGC 41938-1::[IRIS 313-11277]	IRIS 313-11277	IRGC 127157	aus	29	C	T	T	-	-	-	C	C	C	T	C	-	-	-	-	A	A	G	C	T	T	-	A	-	G	G	C	T	T	C	G	T	G	G	G	G	T	T	T
ARC 15589::IRGC 42096-2::[IRIS 313-11282]	IRIS 313-11282	IRGC 132243	ind2	1	C	ARC 15589::IRGC 42096-2::[IRIS 313-11282]	IRIS 313-11282	IRGC 132243	ind2	25	C	T	T	-	-	-	C	C	C	T	C	-	-	-	-	A	A	G	C	T	T	-	A	-	G	G	C	T	T	C	G	T	G	G	G	G	G	-	-
ARC 18001::IRGC 42195-2::[IRIS 313-11284]	IRIS 313-11284	IRGC 135638	indx	1	C	ARC 18001::IRGC 42195-2::[IRIS 313-11284]	IRIS 313-11284	IRGC 135638	indx	20	C	T	T	-	-	-	C	C	C	T	C	-	-	-	-	C	-	G	C	T	T	-	A	-	G	G	C	T	T	C	G	T	G	G	G	G	T	T	T
ARC 18371::IRGC 42423-2::[IRIS 313-11287]	IRIS 313-11287	IRGC 127969	indx	1	C	ARC 18371::IRGC 42423-2::[IRIS 313-11287]	IRIS 313-11287	IRGC 127969	indx	29	C	T	T	-	-	-	C	C	C	T	C	-	-	-	-	A	A	G	C	T	T	-	A	-	G	G	C	T	T	C	G	T	G	G	G	G	T	T	T
ARC 15373::IRGC 43166-2::[IRIS 313-11305]	IRIS 313-11305	IRGC 127964	indx	1	C	ARC 15373::IRGC 43166-2::[IRIS 313-11305]	IRIS 313-11305	IRGC 127964	indx	18	C	T	T	-	-	-	C	C	C	T	C	-	-	-	-	A	A	G	C	T	T	-	A	-	G	G	C	T	T	C	G	T	G	G	G	G	G	-	-
ARC 15385::IRGC 43174-1::[IRIS 313-11306]	IRIS 313-11306	IRGC 127159	indx	1	C	ARC 15385::IRGC 43174-1::[IRIS 313-11306]	IRIS 313-11306	IRGC 127159	indx	13	C	T	T	-	-	-	C	C	C	T	C	-	-	-	-	C	-	G	C	T	T	-	A	-	G	G	C	T	T	C	G	T	G	G	G	G	T	T	T
ARC 15862::IRGC 43242-1::[IRIS 313-11309]	IRIS 313-11309	IRGC 128229	indx	1	C	ARC 15862::IRGC 43242-1::[IRIS 313-11309]	IRIS 313-11309	IRGC 128229	indx	21	C	T	T	-	-	-	C	C	C	T	C	-	-	-	-	A	A	G	C	T	T	-	A	-	G	G	C	T	T	C	G	T	G	G	G	G	G	-	-
RANTAT::IRGC 43563-1::[IRIS 313-11316]	IRIS 313-11316	IRGC 135790	ind3	1	C	RANTAT::IRGC 43563-1::[IRIS 313-11316]	IRIS 313-11316	IRGC 135790	ind3	29	C	T	T	-	-	-	C	C	C	T	C	-	-	-	-	A	A	G	C	T	T	-	A	-	G	G	C	T	T	C	G	T	G	G	G	G	T	T	T
KENCANA RANDAH::IRGC 43709-2::[IRIS 313-11319]	IRIS 313-11319		ind3	1	C	KENCANA RANDAH::IRGC 43709-2::[IRIS 313-11319]	IRIS 313-11319		ind3	16	C	T	T	-	-	-	C	C	C	T	C	-	-	-	-	A	A	G	C	T	T	-	A	-	G	G	C	T	T	C	G	T	G	G	G	G	T	T	T
MAYAS PUTIH::IRGC 43727-2::[IRIS 313-11320]	IRIS 313-11320		ind3	1	C	MAYAS PUTIH::IRGC 43727-2::[IRIS 313-11320]	IRIS 313-11320		ind3	25	C	T	T	-	-	-	C	C	C	T	C	-	-	-	-	A	A	G	C	T	T	-	A	-	G	G	C	T	T	C	G	T	G	G	G	G	G	-	-
PURTOK (MALAGKIT)::IRGC 44707-2::[IRIS 313-11343]	IRIS 313-11343	IRGC 132263	ind3	1	C	PURTOK (MALAGKIT)::IRGC 44707-2::[IRIS 313-11343]	IRIS 313-11343	IRGC 132263	ind3	18	C	T	T	-	-	-	C	C	C	T	C	-	-	-	-	A	A	G	C	T	T	-	A	-	G	G	C	T	T	C	G	T	G	G	G	G	G	-	-
WAGWAG::IRGC 44802-1::[IRIS 313-11345]	IRIS 313-11345	IRGC 127891	indx	1	C	WAGWAG::IRGC 44802-1::[IRIS 313-11345]	IRIS 313-11345	IRGC 127891	indx	23	C	T	T	-	-	-	C	C	C	T	C	-	-	-	-	A	A	G	C	T	T	-	A	-	G	G	C	T	T	C	G	T	G	G	G	G	T	T	T
WAGWAG RAOIS::IRGC 44805-1::[IRIS 313-11347]	IRIS 313-11347	IRGC 127892	indx	1	C	WAGWAG RAOIS::IRGC 44805-1::[IRIS 313-11347]	IRIS 313-11347	IRGC 127892	indx	19	C	T	T	-	-	-	C	C	C	T	C	-	-	-	-	C	-	G	C	T	T	-	A	-	G	G	C	T	T	C	G	T	G	G	G	G	G	-	-
BACHHAIKALMA::IRGC 45003-2::[IRIS 313-11349]	IRIS 313-11349	IRGC 127980	ind2	1	C	BACHHAIKALMA::IRGC 45003-2::[IRIS 313-11349]	IRIS 313-11349	IRGC 127980	ind2	23	C	T	T	-	-	-	C	C	C	T	C	-	-	-	-	A	A	G	C	T	T	-	A	-	G	G	C	T	T	C	G	T	G	G	G	G	T	T	T
BAJAL::IRGC 45024-2::[IRIS 313-11350]	IRIS 313-11350	IRGC 127983	aro	1	C	BAJAL::IRGC 45024-2::[IRIS 313-11350]	IRIS 313-11350	IRGC 127983	aro	29	C	T	T	-	-	-	C	C	C	T	C	-	-	-	-	A	A	G	C	T	T	-	A	-	G	G	C	T	T	C	G	T	G	G	G	G	T	T	T
BANCHI::IRGC 45055-2::[IRIS 313-11351]	IRIS 313-11351	IRGC 127986	ind2	1	C	BANCHI::IRGC 45055-2::[IRIS 313-11351]	IRIS 313-11351	IRGC 127986	ind2	27	C	T	T	-	-	-	C	C	C	T	C	-	-	-	-	A	A	G	C	T	T	-	A	-	G	G	C	T	T	C	G	T	G	G	G	G	G	-	-
DADKHANI::IRGC 45454-2::[IRIS 313-11358]	IRIS 313-11358	IRGC 128023	ind2	1	C	DADKHANI::IRGC 45454-2::[IRIS 313-11358]	IRIS 313-11358	IRGC 128023	ind2	18	C	T	T	-	-	-	C	C	C	T	C	-	-	-	-	A	A	G	C	T	T	-	A	-	G	G	C	T	T	C	G	T	G	G	G	G	T	T	T
DAHARNAGRA::IRGC 45465-2::[IRIS 313-11359]	IRIS 313-11359	IRGC 128024	ind2	1	C	DAHARNAGRA::IRGC 45465-2::[IRIS 313-11359]	IRIS 313-11359	IRGC 128024	ind2	25	C	T	T	-	-	-	C	C	C	T	C	-	-	-	-	A	A	G	C	T	T	-	A	-	G	G	C	T	T	C	G	T	G	G	G	G	G	-	-
KALIKALMA::IRGC 45996-2::[IRIS 313-11361]	IRIS 313-11361	IRGC 128067	ind2	1	C	KALIKALMA::IRGC 45996-2::[IRIS 313-11361]	IRIS 313-11361	IRGC 128067	ind2	22	C	T	T	-	-	-	C	C	C	T	C	-	-	-	-	A	A	G	C	T	T	-	A	-	G	G	C	T	T	C	G	T	G	G	G	G	T	T	T
LANJALI::IRGC 46236-2::[IRIS 313-11365]	IRIS 313-11365	IRGC 128095	indx	1	C	LANJALI::IRGC 46236-2::[IRIS 313-11365]	IRIS 313-11365	IRGC 128095	indx	29	C	T	T	-	-	-	C	C	C	T	C	-	-	-	-	A	A	G	C	T	T	-	A	-	G	G	C	T	T	C	G	T	G	G	G	G	T	T	T
SUFALDHULA::IRGC 46698-2::[IRIS 313-11372]	IRIS 313-11372	IRGC 128173	ind2	1	C	SUFALDHULA::IRGC 46698-2::[IRIS 313-11372]	IRIS 313-11372	IRGC 128173	ind2	28	C	T	T	-	-	-	C	C	C	T	C	-	-	-	-	A	A	G	C	T	T	-	A	-	G	G	C	T	T	C	G	T	G	G	G	G	T	T	T
AMARILLO::IRGC 47120-1::[IRIS 313-11377]	IRIS 313-11377	IRGC 127119	indx	1	C	AMARILLO::IRGC 47120-1::[IRIS 313-11377]	IRIS 313-11377	IRGC 127119	indx	19	C	T	T	-	-	-	C	C	C	T	C	-	-	-	-	A	A	G	C	T	T	-	A	-	G	G	C	T	T	C	G	T	G	G	G	G	G	-	-
LINANGAN::IRGC 47255-2::[IRIS 313-11381]	IRIS 313-11381	IRGC 132351	ind3	1	C	LINANGAN::IRGC 47255-2::[IRIS 313-11381]	IRIS 313-11381	IRGC 132351	ind3	29	C	T	T	-	-	-	C	C	C	T	C	-	-	-	-	A	A	G	C	T	T	-	A	-	G	G	C	T	T	C	G	T	G	G	G	G	T	T	T
HONDERAWALA::IRGC 47372-1::[IRIS 313-11382]	IRIS 313-11382		indx	1	C	HONDERAWALA::IRGC 47372-1::[IRIS 313-11382]	IRIS 313-11382		indx	29	C	T	T	-	-	-	C	C	C	T	C	-	-	-	-	A	A	G	C	T			A	-	G	G	C	T	T	C	G	T	G	G	G	G	T	T	T
LEUANG PRA TAHN::IRGC 48292-2::[IRIS 313-11389]	IRIS 313-11389		ind3	1	C	LEUANG PRA TAHN::IRGC 48292-2::[IRIS 313-11389]	IRIS 313-11389		ind3	19	C	T	T	-	-	-	C	C	C	T	C	-	-	-	-	A	A	G	C	T	T	-	A	-	G	G	C	T	T	C	G	T	G	G	G	G	T	T	T
NIAW DAM::IRGC 48387-2::[IRIS 313-11391]	IRIS 313-11391	IRGC 132260	ind3	1	C	NIAW DAM::IRGC 48387-2::[IRIS 313-11391]	IRIS 313-11391	IRGC 132260	ind3	27	C	T	T	-	-	-	C	C	C	T	C	-	-	-	-	A	A	G	C	T	T	-	A	-	G	G	C	T	T	C	G	T	G		G	G	G	-	-
INDO NO 13075::IRGC 48665-1::[IRIS 313-11395]	IRIS 313-11395	IRGC 135755	ind3	1	C	INDO NO 13075::IRGC 48665-1::[IRIS 313-11395]	IRIS 313-11395	IRGC 135755	ind3	29	C	T	T	-	-	-	C	C	C	T	C	-	-	-	-	A	A	G	C	T	T	-	A	-	G	G	C	T	T	C	G	T	G	G	G	G	T	T	T
ECHORSAIL::IRGC 49182-1::[IRIS 313-11400]	IRIS 313-11400		indx	1	C	ECHORSAIL::IRGC 49182-1::[IRIS 313-11400]	IRIS 313-11400		indx	21	C	T	T	-	-	-	C	C	C	T	C	-	-	-	-	A	A	G	C	T	T	-	A	-	G	G	C	T	T	C	G	T	G	G	G	G	T	T	T
AMON 4::IRGC 49375-2::[IRIS 313-11404]	IRIS 313-11404	IRGC 127925	ind2	1	C	AMON 4::IRGC 49375-2::[IRIS 313-11404]	IRIS 313-11404	IRGC 127925	ind2	25	C	T	T	-	-	-	C	C	C	T	C	-	-	-	-	C	-	G	C	T	T	-	A	-	G	G	C	T	T	C	G	T	G	G	G	G	T	T	T
A 28-6::IRGC 49409-2::[IRIS 313-11406]	IRIS 313-11406	IRGC 127921	ind3	1	C	A 28-6::IRGC 49409-2::[IRIS 313-11406]	IRIS 313-11406	IRGC 127921	ind3	27	C	T	T	-	-	-	C	C	C	T	C	-	-	-	-	A	A	G	C	T	T	-	A	-	G	G	C	T	T	C	G	T	G	G	G	G	T	T	T
MUTHA SAMBA::IRGC 49924-2::[IRIS 313-11419]	IRIS 313-11419		indx	1	C	MUTHA SAMBA::IRGC 49924-2::[IRIS 313-11419]	IRIS 313-11419		indx	14	C	T	T	-	-	-	C	C	C	T	C	-	-	-	-	C	-	G	C	T	T	-	A	-	G	G	C	T	T	C	G	T	G	G	G	G	T	T	T
TULASIBAS::IRGC 50192-2::[IRIS 313-11421]	IRIS 313-11421	IRGC 128196	ind2	1	C	TULASIBAS::IRGC 50192-2::[IRIS 313-11421]	IRIS 313-11421	IRGC 128196	ind2	13	C	T	T	-	-	-	C	C	C	T	C	-	-	-	-	A	A	G	C	T	T	-	A	-	G	G	C	T	T	C	G	T	G	G	G	G	T	T	T
NCS 102::IRGC 51854-1::[IRIS 313-11445]	IRIS 313-11445	IRGC 127653	ind2	1	C	NCS 102::IRGC 51854-1::[IRIS 313-11445]	IRIS 313-11445	IRGC 127653	ind2	14	C	T	T	-	-	-	C	C	C	T	C	-	-	-	-			G	C	T	T	-	A	-	G	G	C	T	T	C	G	T	G	G	G	G	G	-	-
TUNAGANNAPNANG::IRGC 52046-1::[IRIS 313-11447]	IRIS 313-11447	IRGC 128492	indx	1	C	TUNAGANNAPNANG::IRGC 52046-1::[IRIS 313-11447]	IRIS 313-11447	IRGC 128492	indx	23	C	T	T	-	-	-	C	C	C	T	C	-	-	-	-	A	A	G	C	T	T	-	A	-	G	G	C	T	T	C	G	T	G		G	G	T	T	T
ZINYA KOLAMBA::IRGC 52402-1::[IRIS 313-11453]	IRIS 313-11453	IRGC 127916	ind2	1	C	ZINYA KOLAMBA::IRGC 52402-1::[IRIS 313-11453]	IRIS 313-11453	IRGC 127916	ind2	29	C	T	T	-	-	-	C	C	C	T	C	-	-	-	-	A	A	G	C	T	T	-	A	-	G	G	C	T	T	C	G	T	G	G	G	G	T	T	T
SELHI::IRGC 52760-1::[IRIS 313-11460]	IRIS 313-11460	IRGC 127792	ind2	1	C	SELHI::IRGC 52760-1::[IRIS 313-11460]	IRIS 313-11460	IRGC 127792	ind2	29	C	T	T	-	-	-	C	C	C	T	C	-	-	-	-	A	A	G	C	T	T	-	A	-	G	G	C	T	T	C	G	T	G	G	G	G	T	T	T
KATSIYAM TABAO::IRGC 52855-1::[IRIS 313-11463]	IRIS 313-11463	IRGC 127499	indx	1	C	KATSIYAM TABAO::IRGC 52855-1::[IRIS 313-11463]	IRIS 313-11463	IRGC 127499	indx	23	C	T	T	-	-	-	C	C	C	T	C	-	-	-	-	A	A	G	C	T	T	-	A	-	G	G	C	T	T	C	G	T	G	G	G	G	T	T	T
ARC 15480::IRGC 53799-1::[IRIS 313-11490]	IRIS 313-11490	IRGC 127160	indx	1	C	ARC 15480::IRGC 53799-1::[IRIS 313-11490]	IRIS 313-11490	IRGC 127160	indx	23	C	T	T	-	-	-	C	C	C	T	C	-	-	-	-	A	A	G	C	T	T	-	A	-	G	G	C	T	T	C	G	T	G	G	G	G	T	T	T
PADI ARA::IRGC 54252-2::[IRIS 313-11497]	IRIS 313-11497	IRGC 135630	ind2	1	C	PADI ARA::IRGC 54252-2::[IRIS 313-11497]	IRIS 313-11497	IRGC 135630	ind2	19	C	T	T	-	-	-	C	C	C	T	C	-	-	-	-	A	A	G	C	T	T	-	A	-	G	G	C	T	T	C	G	T	G	G	G	G	T	T	T
SKK::IRGC 54356-1::[IRIS 313-11500]	IRIS 313-11500	IRGC 127816	ind2	1	C	SKK::IRGC 54356-1::[IRIS 313-11500]	IRIS 313-11500	IRGC 127816	ind2	18	C	T	T	-	-	-	C	C	C	T	C	-	-	-	-	A	A	G	C	T	T	-	A	-	G	G	C	T	T	C	G	T	G	G	G	G	T	T	T
K 15591-4::IRGC 55043-1::[IRIS 313-11506]	IRIS 313-11506	IRGC 127470	indx	1	C	K 15591-4::IRGC 55043-1::[IRIS 313-11506]	IRIS 313-11506	IRGC 127470	indx	25	C	T	T	-	-	-	C	C	C	T	C	-	-	-	-	A	A	G	C	T	T	-	A	-	G	G	C	T	T	C	G	T	G	G	G	G	G	-	-
PRADOO DAENG::IRGC 55265-1::[IRIS 313-11509]	IRIS 313-11509	IRGC 132035	ind3	1	C	PRADOO DAENG::IRGC 55265-1::[IRIS 313-11509]	IRIS 313-11509	IRGC 132035	ind3	12	C	T	T	-	-	-	C	C	C	T	C	-	-	-	-	A	A	G	C	T	T	-	A	-	G	G	C	T	T	C	G	T	G	G	G	G	T	T	T
OYAK PAKANG::IRGC 55422-1::[IRIS 313-11512]	IRIS 313-11512	IRGC 127693	indx	1	C	OYAK PAKANG::IRGC 55422-1::[IRIS 313-11512]	IRIS 313-11512	IRGC 127693	indx	26	C	T	T	-	-	-	C	C	C	T	C	-	-	-	-	A	A	G	C	T	T	-	A	-	G	G	C	T	T	C	G	T	G	G	G	G	T	T	T
IR 3839-1::IRGC 55946-1::[IRIS 313-11516]	IRIS 313-11516	IRGC 127437	indx	1	C	IR 3839-1::IRGC 55946-1::[IRIS 313-11516]	IRIS 313-11516	IRGC 127437	indx	29	C	T	T	-	-	-	C	C	C	T	C	-	-	-	-	A	A	G	C	T	T	-	A	-	G	G	C	T	T	C	G	T	G	G	G	G	T	T	T
IR 4432-28-5::IRGC 55952-1::[IRIS 313-11517]	IRIS 313-11517	IRGC 127438	ind1B	1	C	IR 4432-28-5::IRGC 55952-1::[IRIS 313-11517]	IRIS 313-11517	IRGC 127438	ind1B	23	C	T	T	-	-	-	C	C	C	T	C	-	-	-	-	A	A	G	C	T	T	-	A	-	G	G	C	T	T	C	G	T	G	G	G	G	T	T	T
ADIALLO::IRGC 56264-1::[IRIS 313-11523]	IRIS 313-11523	IRGC 127106	indx	1	C	ADIALLO::IRGC 56264-1::[IRIS 313-11523]	IRIS 313-11523	IRGC 127106	indx	20	C	T	T	-	-	-	C	C	C	T	C	-	-	-	-	A	A	G	C	T	T	-	A	-	G	G	C	T	T	C	G	T	G	G	G	G	T	T	T
NAHNG KHAO BOW::IRGC 57377-1::[IRIS 313-11534]	IRIS 313-11534		ind3	1	C	NAHNG KHAO BOW::IRGC 57377-1::[IRIS 313-11534]	IRIS 313-11534		ind3	16	C	T	T	-	-	-	C	C	C	T						C	-	G	C	T	T	-	A	-	G	G	C	T	T	C	G	T	G		G	G	G	-	-
HOE PHAR THAE::IRGC 57907-1::[IRIS 313-11541]	IRIS 313-11541	IRGC 127410	indx	1	C	HOE PHAR THAE::IRGC 57907-1::[IRIS 313-11541]	IRIS 313-11541	IRGC 127410	indx	23	C	T	T	-	-	-	C	C	C	T	C	-	-	-	-	A	A	G	C	T	T	-	A	-	G	G	C	T	T	C	G	T	G	G	G	G	T	T	T
NGA CHAN HMWE::IRGC 58146-1::[IRIS 313-11546]	IRIS 313-11546	IRGC 127672	indx	1	C	NGA CHAN HMWE::IRGC 58146-1::[IRIS 313-11546]	IRIS 313-11546	IRGC 127672	indx	27	C	T	T	-	-	-	C	C	C	T	C	-	-	-	-	A	A	G	C	T	T	-	A	-	G	G	C	T	T	C	G	T	G	G	G	G	T	T	T
SHWE SABA::IRGC 58206-1::[IRIS 313-11547]	IRIS 313-11547	IRGC 135580	indx	1	C	SHWE SABA::IRGC 58206-1::[IRIS 313-11547]	IRIS 313-11547	IRGC 135580	indx	37	C	T	T	-	-	-	C	C	C	T	C	-	-	-	-	A	A	G	C	T	T	-	A	-	G	G	C	T	T	C	G	T	G	G	G	G	T	T	T
FELEGBASEH::IRGC 58443-1::[IRIS 313-11551]	IRIS 313-11551	IRGC 135566	ind3	1	C	FELEGBASEH::IRGC 58443-1::[IRIS 313-11551]	IRIS 313-11551	IRGC 135566	ind3	18	C	T	T	-	-	-	C	C	C	T	C	-	-	-	-			G	C	T	T	-	A	-	G	G	C	T	T	C	G	T	G	G	G	G	T	T	T
RATO BASMATI::IRGC 59205-1::[IRIS 313-11567]	IRIS 313-11567	IRGC 127766	aro	1	C	RATO BASMATI::IRGC 59205-1::[IRIS 313-11567]	IRIS 313-11567	IRGC 127766	aro	29	C	T	T	-	-	-	C	C	C	T	C	-	-	-	-	A	A	G	C	T	T	-	A	-	G	G	C	T	T	C	G	T	G	G	G	G	T	T	T
BAI MI TIE QIU::IRGC 59414-1::[IRIS 313-11572]	IRIS 313-11572	IRGC 127201	ind1A	1	C	BAI MI TIE QIU::IRGC 59414-1::[IRIS 313-11572]	IRIS 313-11572	IRGC 127201	ind1A	23	C	T	T	-	-	-	C	C	C	T	C	-	-	-	-	A	A	G	C	T	T	-	A	-	G	G	C	T	T	C	G	T	G	G	G	G	T	T	T
GAO LIANG ZAO::IRGC 59563-1::[IRIS 313-11573]	IRIS 313-11573	IRGC 127379	indx	1	C	GAO LIANG ZAO::IRGC 59563-1::[IRIS 313-11573]	IRIS 313-11573	IRGC 127379	indx	22	C	T	T	-	-	-	C	C	C	T	C	-	-	-	-	C	-	G	C	T	T	-	A	-	G	G	C	T	T	C	G	T	G	G	G	G	T	T	T
JIANG HUI DAO::IRGC 59688-1::[IRIS 313-11576]	IRIS 313-11576	IRGC 127459	indx	1	C	JIANG HUI DAO::IRGC 59688-1::[IRIS 313-11576]	IRIS 313-11576	IRGC 127459	indx	20	C	T	T	-	-	-	C	C	C	T	C	-	-	-	-	A	A	G	C	T	T	-	A	-	G	G	C	T	T	C	G	T	G	G	G	G	G	-	-
LANG QIAN CHE::IRGC 59730-1::[IRIS 313-11577]	IRIS 313-11577	IRGC 127551	ind1A	1	C	LANG QIAN CHE::IRGC 59730-1::[IRIS 313-11577]	IRIS 313-11577	IRGC 127551	ind1A	19	C	T	T	-	-	-	C	C	C	T	C	-	-	-	-	A	A	G	C	T	T	-	A	-	G	G	C	T	T	C	G	T	G	G	G	G	T	T	T
TAI ZHOU XIAN::IRGC 59912-1::[IRIS 313-11580]	IRIS 313-11580	IRGC 127840	indx	1	C	TAI ZHOU XIAN::IRGC 59912-1::[IRIS 313-11580]	IRIS 313-11580	IRGC 127840	indx	27	C	T	T	-	-	-	C	C	C	T	C	-	-	-	-	A	A	G	C	T	T	-	A	-	G	G	C	T	T	C	G	T	G	G	G	G	G	-	-
PULUT MERAH 2::IRGC 60427-1::[IRIS 313-11591]	IRIS 313-11591	IRGC 132293	admix	1	C	PULUT MERAH 2::IRGC 60427-1::[IRIS 313-11591]	IRIS 313-11591	IRGC 132293	admix	29	C	T	T	-	-	-	C	C	C	T	C	-	-	-	-	A	A	G	C	T	T	-	A	-	G	G	C	T	T	C	G	T	G	G	G	G	T	T	T
JUGRAY::IRGC 60960-1::[IRIS 313-11599]	IRIS 313-11599	IRGC 127468	ind2	1	C	JUGRAY::IRGC 60960-1::[IRIS 313-11599]	IRIS 313-11599	IRGC 127468	ind2	26	C	T	T	-	-	-	C	C	C	T	C	-	-	-	-	A	A	G	C	T	T	-	A	-	G	G	C	T	T	C	G	T	G	G	G	G	T	T	T
WUA PAN LAK::IRGC 61357-1::[IRIS 313-11610]	IRIS 313-11610		ind3	1	C	WUA PAN LAK::IRGC 61357-1::[IRIS 313-11610]	IRIS 313-11610		ind3	10	C	T	T	-	-	-	C	C	C	T	C	-	-	-	-	C	-	G	C	T	T	-	A	-	G	G	C	T	T	C	G	T	G	G	G	G	G	-	-
MANARE (PHOM)::IRGC 61437-1::[IRIS 313-11615]	IRIS 313-11615	IRGC 132408	ind3	1	C	MANARE (PHOM)::IRGC 61437-1::[IRIS 313-11615]	IRIS 313-11615	IRGC 132408	ind3	29	C	T					C	C	C	T	C	-	-	-	-	A	A	G	C	T	T	-	A	-	G	G	C	T	T	C	G	T	G	G	G	G	T	T	T
GAM PERNG::IRGC 62135-1::[IRIS 313-11635]	IRIS 313-11635	IRGC 128294	ind3	1	C	GAM PERNG::IRGC 62135-1::[IRIS 313-11635]	IRIS 313-11635	IRGC 128294	ind3	37	C	T	T	-	-	-	C	C	C	T	C	-	-	-	-	A	A	G	C	T	T	-	A	-	G	G	C	T	T	C	G	T	G	G	G	G	T	T	T
NCS 458::IRGC 62290-1::[IRIS 313-11640]	IRIS 313-11640	IRGC 127658	ind2	1	C	NCS 458::IRGC 62290-1::[IRIS 313-11640]	IRIS 313-11640	IRGC 127658	ind2	29	C	T	T	-	-	-	C	C	C	T	C	-	-	-	-	A	A	G	C	T	T	-	A	-	G	G	C	T	T	C	G	T	G	G	G	G	T	T	T
NCS 477::IRGC 62299-1::[IRIS 313-11641]	IRIS 313-11641	IRGC 127659	ind2	1	C	NCS 477::IRGC 62299-1::[IRIS 313-11641]	IRIS 313-11641	IRGC 127659	ind2	19	C	T	T	-	-	-	C	C	C	T	C	-	-	-	-	A	A	G	C	T	T	-	A	-	G	G	C	T	T	C	G	T	G	G	G	G	T	T	T
NCS 830::IRGC 62518-1::[IRIS 313-11648]	IRIS 313-11648	IRGC 127667	ind2	1	C	NCS 830::IRGC 62518-1::[IRIS 313-11648]	IRIS 313-11648	IRGC 127667	ind2	29	C	T	T	-	-	-	C	C	C	T	C	-	-	-	-	A	A	G	C	T	T	-	A	-	G	G	C	T	T	C	G	T	G	G	G	G	T	T	T
NCS 901 A::IRGC 62568-1::[IRIS 313-11650]	IRIS 313-11650	IRGC 127668	ind2	1	C	NCS 901 A::IRGC 62568-1::[IRIS 313-11650]	IRIS 313-11650	IRGC 127668	ind2	25	C	T	T	-	-	-	C	C	C	T	C	-	-	-	-	A	A	G	C	T	T	-	A	-	G	G	C	T	T	C	G	T	G	G	G	G	G	-	-
BEUA KAE::IRGC 64221-1::[IRIS 313-11674]	IRIS 313-11674	IRGC 131971	ind3	1	C	BEUA KAE::IRGC 64221-1::[IRIS 313-11674]	IRIS 313-11674	IRGC 131971	ind3	37	C	T	T	-	-	-	C	C	C	T	C	-	-	-	-	A	A	G	C	T	T	-	A	-	G	G	C	T	T	C	G	T	G	G	G	G	T	T	T
NIAW KHIAW NGOO::IRGC 64563-1::[IRIS 313-11683]	IRIS 313-11683	IRGC 127677	ind3	1	C	NIAW KHIAW NGOO::IRGC 64563-1::[IRIS 313-11683]	IRIS 313-11683	IRGC 127677	ind3	29	C	T	T	-	-	-	C	C	C	T	C	-	-	-	-	A	A	G	C	T	T	-	A	-	G	G	C	T	T	C	G	T	G	G	G	G	T	T	T
OB CHUEY::IRGC 64568-1::[IRIS 313-11684]	IRIS 313-11684	IRGC 132021	ind3	1	C	OB CHUEY::IRGC 64568-1::[IRIS 313-11684]	IRIS 313-11684	IRGC 132021	ind3	29	C	T	T	-	-	-	C	C	C	T	C	-	-	-	-	A	A	G	C	T	T	-	A	-	G	G	C	T	T	C	G	T	G	G	G	G	T	T	T
PLAWNG SAENG::IRGC 64595-1::[IRIS 313-11685]	IRIS 313-11685	IRGC 127735	ind3	1	C	PLAWNG SAENG::IRGC 64595-1::[IRIS 313-11685]	IRIS 313-11685	IRGC 127735	ind3	32	C	T	T	-	-	-	C	C	C	T	C	-	-	-	-	A	A	G	C	T	T	-	A	-	G	G	C	T	T	C	G	T	G	G	G	G	T	T	T
SA GAE::IRGC 64613-1::[IRIS 313-11687]	IRIS 313-11687	IRGC 132297	ind3	1	C	SA GAE::IRGC 64613-1::[IRIS 313-11687]	IRIS 313-11687	IRGC 132297	ind3	32	C	T	T	-	-	-	C	C	C	T	C	-	-	-	-	A	A	G	C	T	T	-	A	-	G	G	C	T	T	C	G	T	G	G	G	G	T	T	T
CHING CH'UNG::IRGC 65002-1::[IRIS 313-11693]	IRIS 313-11693	IRGC 127278	indx	1	C	CHING CH'UNG::IRGC 65002-1::[IRIS 313-11693]	IRIS 313-11693	IRGC 127278	indx	23	C	T	T	-	-	-	C	C	C	T	C	-	-	-	-	A	A	G	C	T	T	-	A	-	G	G	C	T	T	C	G	T	G	G	G	G	T	T	T
DAW NOK KAEN::IRGC 65548-1::[IRIS 313-11700]	IRIS 313-11700	IRGC 127306	ind3	1	C	DAW NOK KAEN::IRGC 65548-1::[IRIS 313-11700]	IRIS 313-11700	IRGC 127306	ind3	32	C	T	T	-	-	-	C	C	C	T	C	-	-	-	-	A	A	G	C	T	T	-	A	-	G	G	C	T	T	C	G	T	G	G	G	G	T	T	T
KHAO SAHKORN::IRGC 65948-1::[IRIS 313-11707]	IRIS 313-11707	IRGC 132403	ind3	1	C	KHAO SAHKORN::IRGC 65948-1::[IRIS 313-11707]	IRIS 313-11707	IRGC 132403	ind3	29	C	T	T	-	-	-	C	C	C	T	C	-	-	-	-	A	A	G	C	T	T	-	A	-	G	G	C	T	T	C	G	T	G	G	G	G	T	T	T
LEUANG KHAJAWN::IRGC 66014-1::[IRIS 313-11709]	IRIS 313-11709	IRGC 132010	ind3	1	C	LEUANG KHAJAWN::IRGC 66014-1::[IRIS 313-11709]	IRIS 313-11709	IRGC 132010	ind3	29	C	T	T	-	-	-	C	C	C	T	C	-	-	-	-	A	A	G	C	T	T	-	A	-	G	G	C	T	T	C	G	T	G	G	G	G	T	T	T
LEUANG MAI::IRGC 66019-2::[IRIS 313-11710]	IRIS 313-11710	IRGC 134992	ind3	1	C	LEUANG MAI::IRGC 66019-2::[IRIS 313-11710]	IRIS 313-11710	IRGC 134992	ind3	37	C	T	T	-	-	-	C	C	C	T	C	-	-	-	-	A	A	G	C	T	T	-	A	-	G	G	C	T	T	C	G	T	G	G	G	G	T	T	T
DAW 85::IRGC 66704-1::[IRIS 313-11720]	IRIS 313-11720	IRGC 127302	ind3	1	C	DAW 85::IRGC 66704-1::[IRIS 313-11720]	IRIS 313-11720	IRGC 127302	ind3	29	C	T	T	-	-	-	C	C	C	T	C	-	-	-	-	A	A	G	C	T	T	-	A	-	G	G	C	T	T	C	G	T	G	G	G	G	T	T	T
KONYAN::IRGC 66931-1::[IRIS 313-11724]	IRIS 313-11724	IRGC 127531	ind3	1	C	KONYAN::IRGC 66931-1::[IRIS 313-11724]	IRIS 313-11724	IRGC 127531	ind3	37	C	T	T	-	-	-	C	C	C	T	C	-	-	-	-	A	A	G	C	T	T	-	A	-	G	G	C	T	T	C	G	T	G	G	G	G	T	T	T
GUANG QING 334::IRGC 67132-1::[IRIS 313-11726]	IRIS 313-11726	IRGC 127393	ind1A	1	C	GUANG QING 334::IRGC 67132-1::[IRIS 313-11726]	IRIS 313-11726	IRGC 127393	ind1A	20	C	T	T	-	-	-	C	C	C	T	C	-	-	-	-	A	A	G	C	T	T	-	A	-	G	G	C	T	T	C	G	T	G	G	G	G	G	-	-
LUO SI ZHAN::IRGC 67211-1::[IRIS 313-11728]	IRIS 313-11728	IRGC 127581	ind3	1	C	LUO SI ZHAN::IRGC 67211-1::[IRIS 313-11728]	IRIS 313-11728	IRGC 127581	ind3	29	C	T	T	-	-	-	C	C	C	T	C	-	-	-	-	A	A	G	C	T	T	-	A	-	G	G	C	T	T	C	G	T	G	G	G	G	T	T	T
MEI LIU ZAO 5::IRGC 67231-1::[IRIS 313-11729]	IRIS 313-11729	IRGC 127622	indx	1	C	MEI LIU ZAO 5::IRGC 67231-1::[IRIS 313-11729]	IRIS 313-11729	IRGC 127622	indx	21	C	T	T	-	-	-	C	C	C	T	C	-	-	-	-	A	A	G	C	T	T	-	A	-	G	G	C	T	T	C	G	T	G	G	G	G	T	T	T
QING TAI AI::IRGC 67273-1::[IRIS 313-11731]	IRIS 313-11731	IRGC 127754	indx	1	C	QING TAI AI::IRGC 67273-1::[IRIS 313-11731]	IRIS 313-11731	IRGC 127754	indx	37	C	T	T	-	-	-	C	C	C	T	C	-	-	-	-	A	A	G	C	T	T	-	A	-	G	G	C	T	T	C	G	T	G	G	G	G	T	T	T
QING ZAO 3::IRGC 67281-1::[IRIS 313-11732]	IRIS 313-11732	IRGC 127755	ind1A	1	C	QING ZAO 3::IRGC 67281-1::[IRIS 313-11732]	IRIS 313-11732	IRGC 127755	ind1A	29	C	T	T	-	-	-	C	C	C	T	C	-	-	-	-	A	A	G	C	T	T	-	A	-	G	G	C	T	T	C	G	T	G	G	G	G	T	T	T
SI CHAO 1::IRGC 67335-1::[IRIS 313-11734]	IRIS 313-11734	IRGC 127803	ind1A	1	C	SI CHAO 1::IRGC 67335-1::[IRIS 313-11734]	IRIS 313-11734	IRGC 127803	ind1A	29	C	T	T	-	-	-	C	C	C	T	C	-	-	-	-	A	A	G	C	T	T	-	A	-	G	G	C	T	T	C	G	T	G	G	G	G	T	T	T
YI LI ZHONG::IRGC 67382-1::[IRIS 313-11735]	IRIS 313-11735	IRGC 127904	indx	1	C	YI LI ZHONG::IRGC 67382-1::[IRIS 313-11735]	IRIS 313-11735	IRGC 127904	indx	17	C	T	T	-	-	-	C	C	C	T	C	-	-	-	-	A	A	G	C	T	T	-	A	-	G	G	C	T	T	C	G	T	G	G	G	G	T	T	T
UGAGA::IRGC 67604-1::[IRIS 313-11740]	IRIS 313-11740	IRGC 127872	indx	1	C	UGAGA::IRGC 67604-1::[IRIS 313-11740]	IRIS 313-11740	IRGC 127872	indx	29	C	T	T	-	-	-	C	C	C	T	C	-	-	-	-	A	A	G	C	T	T	-	A	-	G	G	C	T	T	C	G	T	G	G	G	G	T	T	T
AN FU ZHAN::IRGC 67878-1::[IRIS 313-11745]	IRIS 313-11745	IRGC 127123	ind1A	1	C	AN FU ZHAN::IRGC 67878-1::[IRIS 313-11745]	IRIS 313-11745	IRGC 127123	ind1A	29	C	T	T	-	-	-	C	C	C	T	C	-	-	-	-	A	A	G	C	T	T	-	A	-	G	G	C	T	T	C	G	T	G	G	G	G	T	T	T
GAO JIAO YING GAN ZHAN::IRGC 68053-1::[IRIS 313-11748]	IRIS 313-11748	IRGC 127378	indx	1	C	GAO JIAO YING GAN ZHAN::IRGC 68053-1::[IRIS 313-11748]	IRIS 313-11748	IRGC 127378	indx	29	C	T	T	-	-	-	C	C	C	T	C	-	-	-	-	A	A	G	C	T	T	-	A	-	G	G	C	T	T	C	G	T	G	G	G	G	T	T	T
L 10595::IRGC 68109-1::[IRIS 313-11750]	IRIS 313-11750	IRGC 127538	indx	1	C	L 10595::IRGC 68109-1::[IRIS 313-11750]	IRIS 313-11750	IRGC 127538	indx	29	C	T	T	-	-	-	C	C	C	T	C	-	-	-	-	A	A	G	C	T	T	-	A	-	G	G	C	T	T	C	G	T	G	G	G	G	T	T	T
FOFFI::IRGC 68438-1::[IRIS 313-11758]	IRIS 313-11758	IRGC 131987	ind2	1	C	FOFFI::IRGC 68438-1::[IRIS 313-11758]	IRIS 313-11758	IRGC 131987	ind2	37	C	T	T	-	-	-	C	C	C	T	C	-	-	-	-	A	A	G	C	T	T	-	A	-	G	G	C	T	T	C	G	T	G	G	G	G	T	T	T
MENAHARA 505::IRGC 68709-1::[IRIS 313-11760]	IRIS 313-11760	IRGC 127623	ind2	1	C	MENAHARA 505::IRGC 68709-1::[IRIS 313-11760]	IRIS 313-11760	IRGC 127623	ind2	29	C	T	T	-	-	-	C	C	C	T	C	-	-	-	-	A	A	G	C	T	T	-	A	-	G	G	C	T	T	C	G	T	G	G	G	G	T	T	T
NS 199::IRGC 68864-1::[IRIS 313-11761]	IRIS 313-11761	IRGC 127683	ind2	1	C	NS 199::IRGC 68864-1::[IRIS 313-11761]	IRIS 313-11761	IRGC 127683	ind2	23	C	T	T	-	-	-	C	C	C	T	C	-	-	-	-	A	A	G	C	T	T	-	A	-	G	G	C	T	T	C	G	T	G	G	G	G	T	T	T
NS 1515::IRGC 68947-1::[IRIS 313-11762]	IRIS 313-11762	IRGC 127682	ind2	1	C	NS 1515::IRGC 68947-1::[IRIS 313-11762]	IRIS 313-11762	IRGC 127682	ind2	23	C	T	T	-	-	-	C	C	C	T	C	-	-	-	-	A	A	G	C	T	T	-	A	-	G	G	C	T	T	C	G	T	G	G	G	G	T	T	T
P 41::IRGC 68987-1::[IRIS 313-11764]	IRIS 313-11764	IRGC 127697	ind3	1	C	P 41::IRGC 68987-1::[IRIS 313-11764]	IRIS 313-11764	IRGC 127697	ind3	29	C	T	T	-	-	-	C	C	C	T	C	-	-	-	-	A	A	G	C	T	T	-	A	-	G	G	C	T	T	C	G	T	G	G	G	G	T	T	T
AUS 78-125::IRGC 69464-1::[IRIS 313-11773]	IRIS 313-11773	IRGC 132275	ind3	1	C	AUS 78-125::IRGC 69464-1::[IRIS 313-11773]	IRIS 313-11773	IRGC 132275	ind3	27	C	T	T	-	-	-	C	C	C	T	C	-	-	-	-	A	A	G	C	T	T	-	A	-	G	G	C	T	T	C	G	T	G	G	G	G	T	T	T
KOMALIOKO::IRGC 69958-1::[IRIS 313-11793]	IRIS 313-11793	IRGC 128350	ind2	1	C	KOMALIOKO::IRGC 69958-1::[IRIS 313-11793]	IRIS 313-11793	IRGC 128350	ind2	23	C	T	T	-	-	-	C	C	C	T	C	-	-	-	-	A	A	G	C	T	T	-	A	-	G	G	C	T	T	C	G	T	G	G	G	G	T	T	T
TSIPALA MENAHAR::IRGC 69979-1::[IRIS 313-11794]	IRIS 313-11794	IRGC 127867	ind2	1	C	TSIPALA MENAHAR::IRGC 69979-1::[IRIS 313-11794]	IRIS 313-11794	IRGC 127867	ind2	37	C	T	T	-	-	-	C	C	C	T	C	-	-	-	-	A	A	G	C	T	T	-	A	-	G	G	C	T	T	C	G	T	G	G	G	G	T	T	T
JIE CAO ZHAN::IRGC 70305-1::[IRIS 313-11802]	IRIS 313-11802	IRGC 127460	ind1A	1	C	JIE CAO ZHAN::IRGC 70305-1::[IRIS 313-11802]	IRIS 313-11802	IRGC 127460	ind1A	37	C	T	T	-	-	-	C	C	C	T	C	-	-	-	-	A	A	G	C	T	T	-	A	-	G	G	C	T	T	C	G	T	G	G	G	G	T	T	T
XI HONG GU::IRGC 70416-1::[IRIS 313-11805]	IRIS 313-11805	IRGC 127895	ind1A	1	C	XI HONG GU::IRGC 70416-1::[IRIS 313-11805]	IRIS 313-11805	IRGC 127895	ind1A	29	C	T	T	-	-	-	C	C	C	T	C	-	-	-	-	A	A	G	C	T	T	-	A	-	G	G	C	T	T	C	G	T	G	G	G	G	T	T	T
MOSHI::IRGC 70648-1::[IRIS 313-11811]	IRIS 313-11811	IRGC 127632	ind2	1	C	MOSHI::IRGC 70648-1::[IRIS 313-11811]	IRIS 313-11811	IRGC 127632	ind2	29	C	T	T	-	-	-	C	C	C	T	C	-	-	-	-	A	A	G	C	T	T	-	A	-	G	G	C	T	T	C	G	T	G	G	G	G	T	T	T
KHAOSAING::IRGC 70746-2::[IRIS 313-11817]	IRIS 313-11817	IRGC 128085	indx	1	C	KHAOSAING::IRGC 70746-2::[IRIS 313-11817]	IRIS 313-11817	IRGC 128085	indx	27	C	T	T	-	-	-	C	C	C	T	C	-	-	-	-	A	A	G	C	T	T	-	A	-	G	G	C	T	T	C	G	T	G	G	G	G	T	T	T
BHU BHUSI::IRGC 70803-1::[IRIS 313-11823]	IRIS 313-11823	IRGC 127223	ind2	1	C	BHU BHUSI::IRGC 70803-1::[IRIS 313-11823]	IRIS 313-11823	IRGC 127223	ind2	37	C	T	T	-	-	-	C	C	C	T	C	-	-	-	-	A	A	G	C	T	T	-	A	-	G	G	C	T	T	C	G	T	G	G	G	G	T	T	T
HANSRAJ::IRGC 70836-1::[IRIS 313-11825]	IRIS 313-11825	IRGC 135753	aro	1	C	HANSRAJ::IRGC 70836-1::[IRIS 313-11825]	IRIS 313-11825	IRGC 135753	aro	29	C	T	T	-	-	-	C	C	C	T	C	-	-	-	-	A	A	G	C	T	T	-	A	-	G	G	C	T	T	C	G	T	G	G	G	G	T	T	T
HIRA NAKHI::IRGC 70840-1::[IRIS 313-11826]	IRIS 313-11826	IRGC 128309	aro	1	C	HIRA NAKHI::IRGC 70840-1::[IRIS 313-11826]	IRIS 313-11826	IRGC 128309	aro	20	C	T	T	-	-	-	C	C	C	T	C	-	-	-	-			G	C	T	T	-	A	-	G	G	C	T	T	C	G	T	G	G	G	G	G	-	-
LALI GURMATIA::IRGC 70854-1::[IRIS 313-11828]	IRIS 313-11828	IRGC 127544	ind2	1	C	LALI GURMATIA::IRGC 70854-1::[IRIS 313-11828]	IRIS 313-11828	IRGC 127544	ind2	21	C	T	T	-	-	-	C	C	C	T	C	-	-	-	-	A	A	G	C	T	T	-	A	-	G	G	C	T	T	C	G	T	G	G	G	G	G	-	-
BAI MI ZAI 7::IRGC 71940-1::[IRIS 313-11852]	IRIS 313-11852	IRGC 127202	ind1A	1	C	BAI MI ZAI 7::IRGC 71940-1::[IRIS 313-11852]	IRIS 313-11852	IRGC 127202	ind1A	25	C	T	T	-	-	-	C	C	C	T	C	-	-	-	-	C	-	G	C	T	T	-	A	-	G	G	C	T	T	C	G	T	G	G	G	G	G	-	-
CHI GU::IRGC 71988-1::[IRIS 313-11854]	IRIS 313-11854	IRGC 127276	ind1A	1	C	CHI GU::IRGC 71988-1::[IRIS 313-11854]	IRIS 313-11854	IRGC 127276	ind1A	23	C	T	T	-	-	-	C	C	C	T	C	-	-	-	-	A	A	G	C	T	T	-	A	-	G	G	C	T	T	C	G	T	G	G	G	G	T	T	-
DA GUAN YIN ZHAN::IRGC 72006-1::[IRIS 313-11855]	IRIS 313-11855	IRGC 127292	ind1A	1	C	DA GUAN YIN ZHAN::IRGC 72006-1::[IRIS 313-11855]	IRIS 313-11855	IRGC 127292	ind1A	20	C	T	T	-	-	-	C	C	C	T	C	-	-	-	-	A	A	G	C	T	T	-	A	-	G	G	C	T	T	C	G	T	G	G	G	G	G	-	-
DA HEI GU::IRGC 72009-1::[IRIS 313-11856]	IRIS 313-11856	IRGC 127293	ind1A	1	C	DA HEI GU::IRGC 72009-1::[IRIS 313-11856]	IRIS 313-11856	IRGC 127293	ind1A	28	C	T	T	-	-	-	C	C	C	T	C	-	-	-	-	C	-	G	C	T	T	-	A	-	G	G	C	T	T	C	G	T	G	G	G	G	T	T	T
DA TIE ZHAN::IRGC 72029-1::[IRIS 313-11858]	IRIS 313-11858	IRGC 127300	ind1A	1	C	DA TIE ZHAN::IRGC 72029-1::[IRIS 313-11858]	IRIS 313-11858	IRGC 127300	ind1A	25	C	T	T	-	-	-	C	C	C	T	C	-	-	-	-	C	-	G	C	T	T	-	A	-	G	G	C	T	T	C	G	T	G	G	G	G	G	-	-
DONG DU::IRGC 72037-1::[IRIS 313-11859]	IRIS 313-11859	IRGC 127339	ind1A	1	C	DONG DU::IRGC 72037-1::[IRIS 313-11859]	IRIS 313-11859	IRGC 127339	ind1A	22	C	T	T	-	-	-	C	C	C	T	C	-	-	-	-	A	A	G	C	T	T	-	A	-	G	G	C	T	T	C	G	T	G	G	G	G	G	-	-
HONG DU BAI::IRGC 72098-1::[IRIS 313-11863]	IRIS 313-11863	IRGC 127413	ind1A	1	C	HONG DU BAI::IRGC 72098-1::[IRIS 313-11863]	IRIS 313-11863	IRGC 127413	ind1A	20	C	T	T	-	-	-	C	C	C	T	C	-	-	-	-	A	A	G	C	T	T	-	A	-	G	G	C	T	T	C	G	T	G	G	G	G	G	-	-
KE SHU BAI::IRGC 72183-1::[IRIS 313-11867]	IRIS 313-11867	IRGC 127503	ind1A	1	C	KE SHU BAI::IRGC 72183-1::[IRIS 313-11867]	IRIS 313-11867	IRGC 127503	ind1A	29	C	T	T	-	-	-	C	C	C	T	C	-	-	-	-	A	A	G	C	T	T	-	A	-	G	G	C	T	T	C	G	T	G	G	G	G	T	T	T
LIU LI YOU::IRGC 72198-1::[IRIS 313-11868]	IRIS 313-11868	IRGC 127569	ind1A	1	C	LIU LI YOU::IRGC 72198-1::[IRIS 313-11868]	IRIS 313-11868	IRGC 127569	ind1A	18	C	T	T	-	-	-	C	C	C	T	C	-	-	-	-	A	A	G	C	T	T	-	A	-	G	G	C	T	T	C	G	T	G	G	G	G	T	T	-
TIE ZHONG::IRGC 72321-1::[IRIS 313-11872]	IRIS 313-11872	IRGC 127858	ind1A	1	C	TIE ZHONG::IRGC 72321-1::[IRIS 313-11872]	IRIS 313-11872	IRGC 127858	ind1A	9	C	T	T	-	-	-	C	C	C	T	C	-	-	-	-	C	-	G	C	T	T	-	A	-	G	G	C	T	T	C	G	T	G	G	G	G
AN NAN ZAO::IRGC 72576-1::[IRIS 313-11877]	IRIS 313-11877	IRGC 127125	ind1A	1	C	AN NAN ZAO::IRGC 72576-1::[IRIS 313-11877]	IRIS 313-11877	IRGC 127125	ind1A	23	C	T	T	-	-	-	C	C	C	T	C	-	-	-	-	A	A	G	C	T	T	-	A	-	G	G	C	T	T	C	G	T	G	G	G	G	T	T	T
BAI RI XIAN::IRGC 72588-1::[IRIS 313-11878]	IRIS 313-11878	IRGC 127203	ind1A	1	C	BAI RI XIAN::IRGC 72588-1::[IRIS 313-11878]	IRIS 313-11878	IRGC 127203	ind1A	37	C	T	T	-	-	-	C	C	C	T	C	-	-	-	-	A	A	G	C	T	T	-	A	-	G	G	C	T	T	C	G	T	G	G	G	G	T	T	T
LIU TIAO XIAN::IRGC 72758-1::[IRIS 313-11881]	IRIS 313-11881	IRGC 127570	ind1A	1	C	LIU TIAO XIAN::IRGC 72758-1::[IRIS 313-11881]	IRIS 313-11881	IRGC 127570	ind1A	20	C	T	T	-	-	-	C	C	C	T	C	-	-	-	-	A	A	G	C	T	T	-	A	-	G	G	C	T	T	C	G	T	G	G	G	G	T	T	T
MAN TIAN QING::IRGC 72776-1::[IRIS 313-11882]	IRIS 313-11882	IRGC 127605	ind1A	1	C	MAN TIAN QING::IRGC 72776-1::[IRIS 313-11882]	IRIS 313-11882	IRGC 127605	ind1A	29	C	T	T	-	-	-	C	C	C	T	C	-	-	-	-	A	A	G	C	T	T	-	A	-	G	G	C	T	T	C	G	T	G	G	G	G	T	T	T
TIAN DAO DAO::IRGC 72837-1::[IRIS 313-11884]	IRIS 313-11884	IRGC 127857	ind1A	1	C	TIAN DAO DAO::IRGC 72837-1::[IRIS 313-11884]	IRIS 313-11884	IRGC 127857	ind1A	26	C	T	T	-	-	-	C	C	C	T	C	-	-	-	-	C	-	G	C	T	T	-	A	-	G	G	C	T	T	C	G	T	G	G	G	G	G	-	-
YANG WAN XIAN::IRGC 72886-1::[IRIS 313-11885]	IRIS 313-11885	IRGC 127899	ind1A	1	C	YANG WAN XIAN::IRGC 72886-1::[IRIS 313-11885]	IRIS 313-11885	IRGC 127899	ind1A	18	C	T	T	-	-	-	C	C	C	T	C	-	-	-	-	A	A	G	C	T	T	-	A	-	G	G	C	T	T	C	G	T	G		G	G	G	-	-
IR 19058-107-1::IRGC 72997-1::[IRIS 313-11887]	IRIS 313-11887	IRGC 127434	ind1B	1	C	IR 19058-107-1::IRGC 72997-1::[IRIS 313-11887]	IRIS 313-11887	IRGC 127434	ind1B	28	C	T	T	-	-	-	C	C	C	T	C	-	-	-	-	A	A	G	C	T	T	-	A	-	G	G	C	T	T	C	G	T	G	G	G	G	T	T	T
LOC TRANG MUON::IRGC 73216-1::[IRIS 313-11894]	IRIS 313-11894	IRGC 128368	indx	1	C	LOC TRANG MUON::IRGC 73216-1::[IRIS 313-11894]	IRIS 313-11894	IRGC 128368	indx	25	C	T	T	-	-	-	C	C	C	T	C	-	-	-	-	A	A	G	C	T	T	-	A	-	G	G	C	T	T	C	G	T	G	G	G	G	T	T	T
PADI SIRANDAH KUNING::IRGC 73762-1::[IRIS 313-11904]	IRIS 313-11904	IRGC 132287	ind3	1	C	PADI SIRANDAH KUNING::IRGC 73762-1::[IRIS 313-11904]	IRIS 313-11904	IRGC 132287	ind3	28	C	T	T	-	-	-	C	C	C	T	C	-	-	-	-	A	A	G	C	T	T	-	A	-	G	G	C	T	T	C	G	T	G	G	G	G	T	T	T
PAYO TINGGI::IRGC 73778-1::[IRIS 313-11905]	IRIS 313-11905	IRGC 132414	ind3	1	C	PAYO TINGGI::IRGC 73778-1::[IRIS 313-11905]	IRIS 313-11905	IRGC 132414	ind3	25	C	T	T	-	-	-	C	C	C	T	C	-	-	-	-	A	A	G	C	T	T	-	A	-	G	G	C	T	T	C	G	T	G	G	G	G	G	-	-
YU HE HONG::IRGC 74266-1::[IRIS 313-11910]	IRIS 313-11910	IRGC 127907	indx	1	C	YU HE HONG::IRGC 74266-1::[IRIS 313-11910]	IRIS 313-11910	IRGC 127907	indx	21	C	T	T	-	-	-	C	C	C	T	C	-	-	-	-	A	A	G	C	T	T	-	A	-	G	G	C	T	T	C	G	T	G	G	G	G	T	T	T
YUN NAN ZHAN::IRGC 74272-1::[IRIS 313-11911]	IRIS 313-11911	IRGC 127908	ind1A	1	C	YUN NAN ZHAN::IRGC 74272-1::[IRIS 313-11911]	IRIS 313-11911	IRGC 127908	ind1A	20	C	T	T	-	-	-	C	C	C	T	C	-	-	-	-	A	A	G	C	T	T	-	A	-	G	G	C	T	T	C	G	T	G	G	G	G	T	T	T
GI TAH::IRGC 74883-1::[IRIS 313-11920]	IRIS 313-11920	IRGC 127386	indx	1	C	GI TAH::IRGC 74883-1::[IRIS 313-11920]	IRIS 313-11920	IRGC 127386	indx	23	C	T	T	-	-	-	C	C	C	T	C	-	-	-	-	A	A	G	C	T	T	-	A	-	G	G	C	T	T	C	G	T	G	G	G	G	T	T	T
KHAO GAHB BUA::IRGC 74937-1::[IRIS 313-11921]	IRIS 313-11921	IRGC 132401	ind3	1	C	KHAO GAHB BUA::IRGC 74937-1::[IRIS 313-11921]	IRIS 313-11921	IRGC 132401	ind3	29	C	T	T	-	-	-	C	C	C	T	C	-	-	-	-	A	A	G	C	T	T	-	A	-	G	G	C	T	T	C	G	T	G	G	G	G	T	T	T
KONG KHSACH BANG KATT::IRGC 75350-1::[IRIS 313-11935]	IRIS 313-11935	IRGC 132006	ind3	1	C	KONG KHSACH BANG KATT::IRGC 75350-1::[IRIS 313-11935]	IRIS 313-11935	IRGC 132006	ind3	21	C	T	T	-	-	-	C	C	C	T	C	-	-	-	-	A	A	G	C	T	T	-	A	-	G	G	C	T	T	C	G	T	G	G	G	G	T	T	T
KAMPTI::IRGC 75626-1::[IRIS 313-11939]	IRIS 313-11939	IRGC 127484	ind3	1	C	KAMPTI::IRGC 75626-1::[IRIS 313-11939]	IRIS 313-11939	IRGC 127484	ind3	19	C	T	T	-	-	-	C	C	C	T	C	-	-	-	-	A	A	G	C	T	T	-	A	-	G	G	C	T	T	C	G	T	G	G	G	G	G	-	-
LIU HE XI HE::IRGC 76661-1::[IRIS 313-11949]	IRIS 313-11949	IRGC 127568	ind1A	1	C	LIU HE XI HE::IRGC 76661-1::[IRIS 313-11949]	IRIS 313-11949	IRGC 127568	ind1A	22	C	T	T	-	-	-	C	C	C	T	C	-	-	-	-	C	-	G	C	T	T	-	A	-	G	G	C	T	T	C	G	T	G	G	G	G	T	T	T
MI GU::IRGC 76687-1::[IRIS 313-11950]	IRIS 313-11950	IRGC 127626	ind1A	1	C	MI GU::IRGC 76687-1::[IRIS 313-11950]	IRIS 313-11950	IRGC 127626	ind1A	23	C	T	T	-	-	-	C	C	C	T	C	-	-	-	-	A	A	G	C	T	T	-	A	-	G	G	C	T	T	C	G	T	G	G	G	G	T	T	T
QI YUE ZHAN::IRGC 76722-1::[IRIS 313-11952]	IRIS 313-11952	IRGC 127756	ind1A	1	C	QI YUE ZHAN::IRGC 76722-1::[IRIS 313-11952]	IRIS 313-11952	IRGC 127756	ind1A	20	C	T	T	-	-	-	C	C	C	T	C	-	-	-	-	A	A	G	C	T	T	-	A	-	G	G	C	T	T	C	G	T	G	G	G	G	T	T	T
XIA HONG GU::IRGC 76803-1::[IRIS 313-11954]	IRIS 313-11954	IRGC 128504	ind1A	1	C	XIA HONG GU::IRGC 76803-1::[IRIS 313-11954]	IRIS 313-11954	IRGC 128504	ind1A	17	C	T	T	-	-	-	C	C	C	T	C	-	-	-	-	C	-	G	C	T	T	-	A	-	G	G	C	T	T	C	G	T	G	G	G	G	G	-	-
DAW LUEY 4-3::IRGC 76929-1::[IRIS 313-11957]	IRIS 313-11957	IRGC 127305	indx	1	C	DAW LUEY 4-3::IRGC 76929-1::[IRIS 313-11957]	IRIS 313-11957	IRGC 127305	indx	22	C	T	T	-	-	-	C	C	C	T	C	-	-	-	-	A	A	G	C	T	T	-	A	-	G	G	C	T	T	C	G	T	G	G	G	G	T	T	T
PUANG MAHLAI KHAO::IRGC 76959-1::[IRIS 313-11958]	IRIS 313-11958		ind3	1	C	PUANG MAHLAI KHAO::IRGC 76959-1::[IRIS 313-11958]	IRIS 313-11958		ind3	29	C	T	T	-	-	-	C	C	C	T	C	-	-	-	-	A	A	G	C	T	T	-	A	-	G	G	C	T	T	C	G	T	G	G	G	G	T	T	T
PORONG::IRGC 76983-1::[IRIS 313-11960]	IRIS 313-11960	IRGC 127740	ind1B	1	C	PORONG::IRGC 76983-1::[IRIS 313-11960]	IRIS 313-11960	IRGC 127740	ind1B	14	C	T	T	-	-	-	C	C	C	T	C	-	-	-	-	C	-	G	C	T	T	-	A	-	G	G	C	T	T	C	G	T	G	G	G	G	G	-	-
KHAO SETTI::IRGC 77084-1::[IRIS 313-11962]	IRIS 313-11962	IRGC 132002	ind3	1	C	KHAO SETTI::IRGC 77084-1::[IRIS 313-11962]	IRIS 313-11962	IRGC 132002	ind3	27	C	T	T	-	-	-	C	C	C	T	C	-	-	-	-	A	A	G	C	T	T	-	A	-	G	G	C	T	T	C	G	T	G	G	G	G	T	T	T
QI GU::IRGC 77381-1::[IRIS 313-11966]	IRIS 313-11966	IRGC 127752	ind1A	1	C	QI GU::IRGC 77381-1::[IRIS 313-11966]	IRIS 313-11966	IRGC 127752	ind1A	27	C	T	T	-	-	-	C	C	C	T	C	-	-	-	-	A	A	G	C	T	T	-	A	-	G	G	C	T	T	C	G	T	G	G	G	G	T	T	T
KERIBAREFOR::IRGC 78454-1::[IRIS 313-11983]	IRIS 313-11983	IRGC 128337	ind2	1	C	KERIBAREFOR::IRGC 78454-1::[IRIS 313-11983]	IRIS 313-11983	IRGC 128337	ind2	21	C	T	T	-	-	-	C	C	C	T	C	-	-	-	-	A	A	G	C	T	T	-	A	-	G	G	C	T	T	C	G	T	G	G	G	G	T	T	T
LI TOU ZHAN::IRGC 78550-1::[IRIS 313-11985]	IRIS 313-11985	IRGC 127567	indx	1	C	LI TOU ZHAN::IRGC 78550-1::[IRIS 313-11985]	IRIS 313-11985	IRGC 127567	indx	23	C	T	T	-	-	-	C	C	C	T	C	-	-	-	-	A	A	G	C	T	T	-	A	-	G	G	C	T	T	C	G	T	G	G	G	G	T	T	T
KAUN TREI::IRGC 79194-1::[IRIS 313-11999]	IRIS 313-11999	IRGC 132281	ind3	1	C	KAUN TREI::IRGC 79194-1::[IRIS 313-11999]	IRIS 313-11999	IRGC 132281	ind3	29	C	T	T	-	-	-	C	C	C	T	C	-	-	-	-	A	A	G	C	T	T	-	A	-	G	G	C	T	T	C	G	T	G	G	G	G	T	T	T
JIA GEN::IRGC 79654-1::[IRIS 313-12007]	IRIS 313-12007	IRGC 127457	indx	1	C	JIA GEN::IRGC 79654-1::[IRIS 313-12007]	IRIS 313-12007	IRGC 127457	indx	19	C	T	T	-	-	-	C	C	C	T	C	-	-	-	-			G	C	T	T	-	A	-	G	G	C	T	T	C	G	T	G	G	G	G	G	-	-
YAN ZHAN::IRGC 79740-1::[IRIS 313-12010]	IRIS 313-12010	IRGC 127900	ind1A	1	C	YAN ZHAN::IRGC 79740-1::[IRIS 313-12010]	IRIS 313-12010	IRGC 127900	ind1A	23	C	T	T	-	-	-	C	C	C	T	C	-	-	-	-	A	A	G	C	T	T	-	A	-	G	G	C	T	T	C	G	T	G	G	G	G	T	T	T
EX SANDEMA::IRGC 79964-1::[IRIS 313-12017]	IRIS 313-12017	IRGC 127364	indx	1	C	EX SANDEMA::IRGC 79964-1::[IRIS 313-12017]	IRIS 313-12017	IRGC 127364	indx	18	C	T	T	-	-	-	C	C	C	T	C	-	-	-	-	A	A	G	C	T	T	-	A	-	G	G	C	T	T	C	G	T	G	G	G	G	T	T	T
ACEH (SELECTION)::IRGC 80233-1::[IRIS 313-12027]	IRIS 313-12027	IRGC 131962	ind3	1	C	ACEH (SELECTION)::IRGC 80233-1::[IRIS 313-12027]	IRIS 313-12027	IRGC 131962	ind3	19	C	T	T	-	-	-	C	C	C	T	C	-	-	-	-	A	A	G	C	T	T	-	A	-	G	G	C	T	T	C	G	T	G	G	G	G	T	T	T
GAO JIAO HONG::IRGC 80920-1::[IRIS 313-12033]	IRIS 313-12033	IRGC 127377	ind1A	1	C	GAO JIAO HONG::IRGC 80920-1::[IRIS 313-12033]	IRIS 313-12033	IRGC 127377	ind1A	29	C	T	T	-	-	-	C	C	C	T	C	-	-	-	-	A	A	G	C	T	T	-	A	-	G	G	C	T	T	C	G	T	G	G	G	G	T	T	T
NEANG AN::IRGC 81315-1::[IRIS 313-12039]	IRIS 313-12039	IRGC 135572	ind3	1	C	NEANG AN::IRGC 81315-1::[IRIS 313-12039]	IRIS 313-12039	IRGC 135572	ind3	18	C	T	T	-	-	-	C	C	C	T	C	-	-	-	-	A	A	G	C	T	T	-	A	-	G	G	C	T	T	C	G	T	G	G	G	G	T	T	T
SAMBOK ANGKRANG::IRGC 81375-1::[IRIS 313-12043]	IRIS 313-12043	IRGC 128458	ind3	1	C	SAMBOK ANGKRANG::IRGC 81375-1::[IRIS 313-12043]	IRIS 313-12043	IRGC 128458	ind3	16	C	T	T	-	-	-	C	C	C	T	C	-	-	-	-	C	-	G	C	T	T	-	A	-	G	G	C	T	T	C	G		G	G	G	G	G	-	-
LEMAK RUSA::IRGC 81486-1::[IRIS 313-12047]	IRIS 313-12047	IRGC 132008	ind3	1	C	LEMAK RUSA::IRGC 81486-1::[IRIS 313-12047]	IRIS 313-12047	IRGC 132008	ind3	16	C	T	T	-	-	-	C	C	C	T	C	-	-	-	-	A	A	G	C	T	T	-	A	-	G	G	C	T	T	C	G	T	G	G	G	G	G	-	-
LIMA::IRGC 81487-1::[IRIS 313-12048]	IRIS 313-12048	IRGC 127564	ind3	1	C	LIMA::IRGC 81487-1::[IRIS 313-12048]	IRIS 313-12048	IRGC 127564	ind3	23	C	T	T	-	-	-	C	C	C	T	C	-	-	-	-	A	A	G	C	T	T	-	A	-	G	G	C	T	T	C	G	T	G	G	G	G	T	T	T
MAE HANG::IRGC 81615-2::[IRIS 313-12049]	IRIS 313-12049	IRGC 132352	ind3	1	C	MAE HANG::IRGC 81615-2::[IRIS 313-12049]	IRIS 313-12049	IRGC 132352	ind3	15	C	T	T	-	-	-	C	C	C	T	C	-	-	-	-	A	A	G	C	T	T	-	A	-	G	G	C	T	T	C	G	T	G	G	G	G	T	T	T
SHAN KAUK HNYIN::IRGC 81656-1::[IRIS 313-12050]	IRIS 313-12050	IRGC 128468	indx	1	C	SHAN KAUK HNYIN::IRGC 81656-1::[IRIS 313-12050]	IRIS 313-12050	IRGC 128468	indx	9	C	T	T	-	-	-	C	C	C	T	C	-	-	-	-			G	C	T	T	-	A	-	G	G	C	T	T	C	G	T	G	G	G	G	T	T	T
ADUKKAN::IRGC 81783-1::[IRIS 313-12052]	IRIS 313-12052	IRGC 127109	indx	1	C	ADUKKAN::IRGC 81783-1::[IRIS 313-12052]	IRIS 313-12052	IRGC 127109	indx	22	C	T	T	-	-	-	C	C	C	T	C	-	-	-	-	A	A	G	C	T	T	-	A	-	G	G	C	T	T	C	G	T	G	G	G	G	T	T	T
AI JIAO ZI::IRGC 82255-1::[IRIS 313-12057]	IRIS 313-12057	IRGC 127116	indx	1	C	AI JIAO ZI::IRGC 82255-1::[IRIS 313-12057]	IRIS 313-12057	IRGC 127116	indx	21	C	T	T	-	-	-	C	C	C	T	C	-	-	-	-	A	A	G	C	T	T	-	A	-	G	G	C	T	T	C	G	T	G	G	G	G	T	T	T
KUL REUSEI::IRGC 82308-1::[IRIS 313-12058]	IRIS 313-12058	IRGC 132406	ind3	1	C	KUL REUSEI::IRGC 82308-1::[IRIS 313-12058]	IRIS 313-12058	IRGC 132406	ind3	37	C	T	T	-	-	-	C	C	C	T	C	-	-	-	-	A	A	G	C	T	T	-	A	-	G	G	C	T	T	C	G	T	G	G	G	G	T	T	T
531::IRGC 82643-1::[IRIS 313-12067]	IRIS 313-12067	IRGC 127100	indx	1	C	531::IRGC 82643-1::[IRIS 313-12067]	IRIS 313-12067	IRGC 127100	indx	16	C	T	T	-	-	-	C	C	C	T	C	-	-	-	-	A	A	G	C	T	T	-	A	-	G	G	C	T	T	C	G	T	G	G	G	G	T	T	T
1146::IRGC 83068-1::[IRIS 313-12081]	IRIS 313-12081	IRGC 128208	ind3	1	C	1146::IRGC 83068-1::[IRIS 313-12081]	IRIS 313-12081	IRGC 128208	ind3	14	C	T	T	-	-	-	C	C	C	T	C	-	-	-	-	A	A	G	C	T	T	-	A	-	G	G	C	T	T	C	G	T	G	G	G	G	G	-	-
MAVOLATSIKA::IRGC 83137-1::[IRIS 313-12082]	IRIS 313-12082	IRGC 127614	ind2	1	C	MAVOLATSIKA::IRGC 83137-1::[IRIS 313-12082]	IRIS 313-12082	IRGC 127614	ind2	21	C	T	T	-	-	-	C	C	C	T	C	-	-	-	-	A	A	G	C	T	T	-	A	-	G	G	C	T	T	C	G	T	G	G	G	G	T	T	T
SARIN TSIPALA::IRGC 83154-1::[IRIS 313-12083]	IRIS 313-12083	IRGC 128460	ind2	1	C	SARIN TSIPALA::IRGC 83154-1::[IRIS 313-12083]	IRIS 313-12083	IRGC 128460	ind2	29	C	T	T	-	-	-	C	C	C	T	C	-	-	-	-	A	A	G	C	T	T	-	A	-	G	G	C	T	T	C	G	T	G	G	G	G	T	T	T
KARUEL::IRGC 83792-1::[IRIS 313-12093]	IRIS 313-12093	IRGC 128334	indx	1	C	KARUEL::IRGC 83792-1::[IRIS 313-12093]	IRIS 313-12093	IRGC 128334	indx	22	C	T	T	-	-	-	C	C	C	T	C	-	-	-	-	A	A	G	C	T	T	-	A	-	G	G	C	T	T	C	G	T	G	G	G	G	T	T	T
NEANG MINH::IRGC 83897-1::[IRIS 313-12097]	IRIS 313-12097	IRGC 135778	ind3	1	C	NEANG MINH::IRGC 83897-1::[IRIS 313-12097]	IRIS 313-12097	IRGC 135778	ind3	21	C	T	T	-	-	-	C	C	C	T	C	-	-	-	-	A	A	G	C	T	T	-	A	-	G	G	C	T	T	C	G	T	G	G	G	G	G	-	-
SAMRONG 2::IRGC 83951-1::[IRIS 313-12101]	IRIS 313-12101	IRGC 132298	ind3	1	C	SAMRONG 2::IRGC 83951-1::[IRIS 313-12101]	IRIS 313-12101	IRGC 132298	ind3	29	C	T	T	-	-	-	C	C	C	T	C	-	-	-	-	A	A	G	C	T	T	-	A	-	G	G	C	T	T	C	G	T	G	G	G	G	T	T	T
ARITH::IRGC 84347-2::[IRIS 313-12109]	IRIS 313-12109	IRGC 127975	ind3	1	C	ARITH::IRGC 84347-2::[IRIS 313-12109]	IRIS 313-12109	IRGC 127975	ind3	23	C	T	T	-	-	-	C	C	C	T	C	-	-	-	-	A	A	G	C	T	T	-	A	-	G	G	C	T	T	C	G	T	G	G	G	G	T	T	T
CHA LIENG::IRGC 84920-1::[IRIS 313-12121]	IRIS 313-12121	IRGC 127254	ind3	1	C	CHA LIENG::IRGC 84920-1::[IRIS 313-12121]	IRIS 313-12121	IRGC 127254	ind3	29	C	T	T	-	-	-	C	C	C	T	C	-	-	-	-	A	A	G	C	T	T	-	A	-	G	G	C	T	T	C	G	T	G	G	G	G	T	T	T
LG 944::IRGC 86000-1::[IRIS 313-12131]	IRIS 313-12131	IRGC 132011	ind3	1	C	LG 944::IRGC 86000-1::[IRIS 313-12131]	IRIS 313-12131	IRGC 132011	ind3	26	C	T	T	-	-	-	C	C	C	T	C	-	-	-	-	A	A	G	C	T	T	-	A	-	G	G	C	T	T	C	G	T		G	G	G	T	T	-
TAP KHOUAY::IRGC 86373-1::[IRIS 313-12133]	IRIS 313-12133	IRGC 127849	ind3	1	C	TAP KHOUAY::IRGC 86373-1::[IRIS 313-12133]	IRIS 313-12133	IRGC 127849	ind3	19	C	T	T	-	-	-	C	C	C	T	C	-	-	-	-	A	A	G	C	T	T	-	A	-	G	G	C	T	T	C	G	T	G	G	G	G	G	-	-
PERUBAK LUEY::IRGC 86436-1::[IRIS 313-12135]	IRIS 313-12135	IRGC 127726	ind1B	1	C	PERUBAK LUEY::IRGC 86436-1::[IRIS 313-12135]	IRIS 313-12135	IRGC 127726	ind1B	23	C	T	T	-	-	-	C	C	C	T	C	-	-	-	-	A	A	G	C	T	T	-	A	-	G	G	C	T	T	C	G	T	G	G	G	G	T	T	T
YADU BARA::IRGC 86912-1::[IRIS 313-12138]	IRIS 313-12138	IRGC 127896	indx	1	C	YADU BARA::IRGC 86912-1::[IRIS 313-12138]	IRIS 313-12138	IRGC 127896	indx	23	C	T	T	-	-	-	C	C	C	T	C	-	-	-	-	A	A	G	C	T	T	-	A	-	G	G	C	T	T	C	G	T	G	G	G	G	T	T	T
SRAU KHGNAERNG::IRGC 87073-1::[IRIS 313-12143]	IRIS 313-12143	IRGC 132300	ind3	1	C	SRAU KHGNAERNG::IRGC 87073-1::[IRIS 313-12143]	IRIS 313-12143	IRGC 132300	ind3	15	C	T	T	-	-	-	C	C	C	T	C	-	-	-	-	A	A	G	C	T	T	-	A	-	G	G	C	T	T	C	G	T	G	G	G	G	G	-	-
ARN'-SAR THNGORN'::IRGC 87205-1::[IRIS 313-12148]	IRIS 313-12148	IRGC 127172	ind3	1	C	ARN'-SAR THNGORN'::IRGC 87205-1::[IRIS 313-12148]	IRIS 313-12148	IRGC 127172	ind3	6	C	T	T	-	-	-	C	C	C	T	C	-	-	-	-	C	-	G	C	T	T	-	A	-	G	G	C	T	T	C	G	T	G	G	G	G	G	-	-
DAMNOEUB KRACHAK SESS::IRGC 87380-1::[IRIS 313-12151]	IRIS 313-12151	IRGC 132279	ind3	1	C	DAMNOEUB KRACHAK SESS::IRGC 87380-1::[IRIS 313-12151]	IRIS 313-12151	IRGC 132279	ind3	21	C	T	T	-	-	-	C	C	C	T	C	-	-	-	-	A	A	G	C	T	T	-	A	-	G	G	C	T	T	C	G	T	G	G	G	G	T	T	T
DAMM NOEB THNGORN'::IRGC 87428-1::[IRIS 313-12152]	IRIS 313-12152	IRGC 132398	ind3	1	C	DAMM NOEB THNGORN'::IRGC 87428-1::[IRIS 313-12152]	IRIS 313-12152	IRGC 132398	ind3	19	C	T	T	-	-	-	C	C	C	T	C	-	-	-	-	C	-	G	C	T	T	-	A	-	G	G	C	T	T	C	G	T	G	G	G	G	G	-	-
JHINUWA DHAN::IRGC 88545-1::[IRIS 313-12180]	IRIS 313-12180	IRGC 128323	indx	1	C	JHINUWA DHAN::IRGC 88545-1::[IRIS 313-12180]	IRIS 313-12180	IRGC 128323	indx	21	C	T	T	-	-	-	C	C	C	T	C	-	-	-	-	A	A	G	C	T	T	-	A	-	G	G	C	T	T	C	G	T	G	G	G	G	T	T	T
BAO DAM::IRGC 89352-1::[IRIS 313-12186]	IRIS 313-12186	IRGC 128239	indx	1	C	BAO DAM::IRGC 89352-1::[IRIS 313-12186]	IRIS 313-12186	IRGC 128239	indx	9	C	T	T	-	-	-	C	C	C	T	C	-	-	-	-	A	A	G	C	T	T	-	A	-	G	G	C	T	T	C	G	T	G	G	G	G	G	-	-
CHAM LEK::IRGC 89387-1::[IRIS 313-12187]	IRIS 313-12187	IRGC 127255	indx	1	C	CHAM LEK::IRGC 89387-1::[IRIS 313-12187]	IRIS 313-12187	IRGC 127255	indx	19	C	T	T	-	-	-	C	C	C	T	C	-	-	-	-	A	A	G	C	T	T	-	A	-	G	G	C	T	T	C	G	T	G	G	G	G	G	-	-
CHAO DO::IRGC 89430-1::[IRIS 313-12188]	IRIS 313-12188	IRGC 127260	ind3	1	C	CHAO DO::IRGC 89430-1::[IRIS 313-12188]	IRIS 313-12188	IRGC 127260	ind3	17	C	T	T	-	-	-	C	C	C	T	C	-	-	-	-	A	A	G	C	T	T	-	A	-	G	G	C	T	T	C	G	T	G	G	G	G	T	T	T
EA POUAK::IRGC 89748-1::[IRIS 313-12194]	IRIS 313-12194	IRGC 127353	ind3	1	C	EA POUAK::IRGC 89748-1::[IRIS 313-12194]	IRIS 313-12194	IRGC 127353	ind3	10	C	T	T	-	-	-	C	C	C	T	C	-	-	-	-	A	A	G	C	T	T	-	A	-	G	G	C	T	T	C	G	T	G	G	G	G	T	T	T
CHAO KHIE KHOUAY::IRGC 90968-1::[IRIS 313-12220]	IRIS 313-12220	IRGC 131976	indx	1	C	CHAO KHIE KHOUAY::IRGC 90968-1::[IRIS 313-12220]	IRIS 313-12220	IRGC 131976	indx	27	C	T	T	-	-	-	C	C	C	T	C	-	-	-	-	A	A	G	C	T	T	-	A	-	G	G	C	T	T	C	G	T	G	G		G	G	-	-
EA LOUY::IRGC 91220-1::[IRIS 313-12221]	IRIS 313-12221	IRGC 127351	ind3	1	C	EA LOUY::IRGC 91220-1::[IRIS 313-12221]	IRIS 313-12221	IRGC 127351	ind3	19	C	T	T	-	-	-	C	C	C	T	C	-	-	-	-	A	A	G	C	T	T	-	A	-	G	G	C	T	T	C	G	T	G	G	G	G	G	-	-
TOUN::IRGC 92291-2::[IRIS 313-12231]	IRIS 313-12231	IRGC 128192	ind3	1	C	TOUN::IRGC 92291-2::[IRIS 313-12231]	IRIS 313-12231	IRGC 128192	ind3	20	C	T	T	-	-	-	C	C	C	T	C	-	-	-	-	A	A	G	C	T	T	-	A	-	G	G	C	T	T	C	G	T	G	G	G	G	T	T	T
LAOZAOGU::IRGC 93444-1::[IRIS 313-12236]	IRIS 313-12236	IRGC 127552	ind1A	1	C	LAOZAOGU::IRGC 93444-1::[IRIS 313-12236]	IRIS 313-12236	IRGC 127552	ind1A	17	C	T	T	-	-	-	C	C	C	T	C	-	-	-	-	C	-	G	C	T	T	-	A	-	G	G	C	T	T	C	G	T	G	G	G	G	T	T	T
WUGU::IRGC 93479-1::[IRIS 313-12237]	IRIS 313-12237	IRGC 127893	ind1A	1	C	WUGU::IRGC 93479-1::[IRIS 313-12237]	IRIS 313-12237	IRGC 127893	ind1A	21	C	T	T	-	-	-	C	C	C	T	C	-	-	-	-	A	A	G	C	T	T	-	A	-	G	G	C	T	T	C	G	T	G	G	G	G	T	T	T
EA TOM::IRGC 95276-1::[IRIS 313-12261]	IRIS 313-12261	IRGC 127354	ind3	1	C	EA TOM::IRGC 95276-1::[IRIS 313-12261]	IRIS 313-12261	IRGC 127354	ind3	20	C	T	T	-	-	-	C	C	C	T	C	-	-	-	-	A	A	G	C	T	T	-	A	-	G	G	C	T	T	C	G	T	G	G	G	G	T	T	T
MAGU::IRGC 97027-1::[IRIS 313-12275]	IRIS 313-12275	IRGC 127590	indx	1	C	MAGU::IRGC 97027-1::[IRIS 313-12275]	IRIS 313-12275	IRGC 127590	indx	12	C	T	T	-	-	-	C	C	C	T	C	-	-	-	-	A	A	G	C	T	T	-	A	-	G	G	C	T	T	C	G	T	G	G	G	G	T	T	T
MAKALIOKA::IRGC 97193-1::[IRIS 313-12280]	IRIS 313-12280	IRGC 132013	indx	1	C	MAKALIOKA::IRGC 97193-1::[IRIS 313-12280]	IRIS 313-12280	IRGC 132013	indx	18	C	T	T	-	-	-	C	C	C	T	C	-	-	-	-	A	A	G	C	T	T	-	A	-	G	G	C	T	T	C	G	T	G	G	G	G	G	-	-
TSY MILA RO::IRGC 97233-1::[IRIS 313-12282]	IRIS 313-12282	IRGC 132302	indx	1	C	TSY MILA RO::IRGC 97233-1::[IRIS 313-12282]	IRIS 313-12282	IRGC 132302	indx	12	C	T	T	-	-	-	C	C	C	T	C	-	-	-	-	C	-	G	C	T	T	-	A	-	G	G	C	T	T	C	G	T	G	G	G	G	G	-	-
VARY 5000 FOTSY::IRGC 97235-1::[IRIS 313-12283]	IRIS 313-12283	IRGC 127884	indx	1	C	VARY 5000 FOTSY::IRGC 97235-1::[IRIS 313-12283]	IRIS 313-12283	IRGC 127884	indx	21	C	T	T	-	-	-	C	C	C	T	C	-	-	-	-	A	A	G	C	T	T	-	A	-	G	G	C	T	T	C	G	T	G	G	G	G	T	T	T
NGWE TOE KYE::IRGC 97530-1::[IRIS 313-12288]	IRIS 313-12288	IRGC 128405	ind3	1	C	NGWE TOE KYE::IRGC 97530-1::[IRIS 313-12288]	IRIS 313-12288	IRGC 128405	ind3	20	C	T	T	-	-	-	C	C	C	T	C	-	-	-	-	C	-	G	C	T	T	-	A	-	G	G	C	T	T	C	G	T	G	G	G	G	G	-	-
JON JAN::IRGC 97633-1::[IRIS 313-12290]	IRIS 313-12290	IRGC 127466	indx	1	C	JON JAN::IRGC 97633-1::[IRIS 313-12290]	IRIS 313-12290	IRGC 127466	indx	23	C	T	T	-	-	-	C	C	C	T	C	-	-	-	-	A	A	G	C	T	T	-	A	-	G	G	C	T	T	C	G	T	G	G	G	G	T	T	T
EMAHTAKYAN::IRGC 97789-1::[IRIS 313-12292]	IRIS 313-12292	IRGC 127358	ind3	1	C	EMAHTAKYAN::IRGC 97789-1::[IRIS 313-12292]	IRIS 313-12292	IRGC 127358	ind3	23	C	T	T	-	-	-	C	C	C	T	C	-	-	-	-	A	A	G	C	T	T	-	A	-	G	G	C	T	T	C	G	T	G	G	G	G	T	T	T
LG 9274::IRGC 98715-1::[IRIS 313-12303]	IRIS 313-12303	IRGC 127561	indx	1	C	LG 9274::IRGC 98715-1::[IRIS 313-12303]	IRIS 313-12303	IRGC 127561	indx	27	C	T	T	-	-	-	C	C	C	T	C	-	-	-	-	A	A	G	C	T	T	-	A	-	G	G	C	T	T	C	G	T	G	G	G	G	G	-	-
PA KHENG KHAW::IRGC 98779-1::[IRIS 313-12305]	IRIS 313-12305	IRGC 127708	ind3	1	C	PA KHENG KHAW::IRGC 98779-1::[IRIS 313-12305]	IRIS 313-12305	IRGC 127708	ind3	21	C	T	T	-	-	-	C	C	C	T	C	-	-	-	-	A	A	G	C	T	T	-	A	-	G	G	C	T	T	C	G	T	G	G	G	G	T	T	T
IR 77298-14-1-2-10::G1::[IRIS 313-15901]	IRIS 313-15901	IRGC 126964	ind1B	1	C	IR 77298-14-1-2-10::G1::[IRIS 313-15901]	IRIS 313-15901	IRGC 126964	ind1B	19	C	T	T	-	-	-	C	C	C	T	C	-	-	-	-	A	A	G	C	T	T	-			G	G	C	T	T	C	G	T	G	G	G	G	G	-	-
IRRI 146::G1::[IRIS 313-15902]	IRIS 313-15902	IRGC 126966	ind1B	1	C	IRRI 146::G1::[IRIS 313-15902]	IRIS 313-15902	IRGC 126966	ind1B	14	C	T	T	-	-	-	C	C	C	T	C	-	-	-	-	A	A	G	C	T	T	-	A	-	G	G	C	T	T	C	G	T	G	G	G	G	G	-	-
IR 73571-3B-11-3-K2::G1::[IRIS 313-15906]	IRIS 313-15906	IRGC 126963	indx	1	C	IR 73571-3B-11-3-K2::G1::[IRIS 313-15906]	IRIS 313-15906	IRGC 126963	indx	19	C	T	T	-	-	-	C	C	C	T	C	-	-	-	-	A	A	G	C	T	T	-	A	-	G	G	C	T	T	C	G	T	G	G	G	G	G	-	-
GAMBIAKA::GERVEX 7920-C1::[IRIS 313-7620]	IRIS 313-7620	IRGC 124392	ind3	1	C	GAMBIAKA::GERVEX 7920-C1::[IRIS 313-7620]	IRIS 313-7620	IRGC 124392	ind3	20	C	T	T	-	-	-	C	C	C	T	C	-	-	-	-	A	A	G	C	T	T	-	A	-	G	G	C	T	T	C	G	T	G	G	G	G	T	T	T
CICA 8::C1::[IRIS 313-7664]	IRIS 313-7664	IRGC 122011	ind1B	1	C	CICA 8::C1::[IRIS 313-7664]	IRIS 313-7664	IRGC 122011	ind1B	20.5	C	T	T	-	-	-	C	C	C	T	C	-	-	-	-	A	A	G	C	T	T	-	A	-	G	G	C	T	T	C	G	T	G	G	G	G	T	T	-
IR 19746-28-2-2::IRGC 78072-C1::[IRIS 313-7685]	IRIS 313-7685	IRGC 122089	ind1B	1	C	IR 19746-28-2-2::IRGC 78072-C1::[IRIS 313-7685]	IRIS 313-7685	IRGC 122089	ind1B	22	C	T	T	-	-	-	C	C	C	T	C	-	-	-	-	A	A	G	C	T	T	-	A	-	G	G	C	T	T	C	G	T	G	G	G	G	T	T	T
IR 2307-247-2-2-3::IRGC 77982-C1::[IRIS 313-7689]	IRIS 313-7689	IRGC 122092	ind1B	1	C	IR 2307-247-2-2-3::IRGC 77982-C1::[IRIS 313-7689]	IRIS 313-7689	IRGC 122092	ind1B	27	C	T	T	-	-	-	C	C	C	T	C	-	-	-	-	A	A	G	C	T	T	-	A	-	G	G	C	T	T	C	G	T	G	G	G	G	G	-	-
IR 57924-24::IRTP 16675-C1::[IRIS 313-7699]	IRIS 313-7699	IRGC 122099	indx	1	C	IR 57924-24::IRTP 16675-C1::[IRIS 313-7699]	IRIS 313-7699	IRGC 122099	indx	16	C	T	T	-	-	-	C	C	C	T	C	-	-	-	-	A	A	G	C	T	T	-	A	-	G	G	C	T	T	C	G	T	G	G	G	G	T	T	T
KOGONI 91-1::C1::[IRIS 313-7719]	IRIS 313-7719	IRGC 122140	indx	1	C	KOGONI 91-1::C1::[IRIS 313-7719]	IRIS 313-7719	IRGC 122140	indx	22	C	T	T	-	-	-	C	C	C	T	C	-	-	-	-	A	A	G	C	T	T	-	A	-	G	G	C	T	T	C	G	T	G	G	G	G	T	T	T
MADINIKA 1329::GERVEX 8366-C1::[IRIS 313-7725]	IRIS 313-7725	IRGC 124407	ind2	1	C	MADINIKA 1329::GERVEX 8366-C1::[IRIS 313-7725]	IRIS 313-7725	IRGC 124407	ind2	27	C	T	T	-	-	-	C	C	C	T	C	-	-	-	-	A	A	G	C	T	T	-	A	-	G	G	C	T	T	C	G	T	G	G	G	G	T	T	T
NONA BOKRA::IRGC 22710-C1::[IRIS 313-7736]	IRIS 313-7736	IRGC 122181	ind2	1	C	NONA BOKRA::IRGC 22710-C1::[IRIS 313-7736]	IRIS 313-7736	IRGC 122181	ind2	20	C	T	T	-	-	-	C	C	C	T	C	-	-	-	-	A	A	G	C	T	T	-	A	-	G	G	C	T	T	C	G	T	G	G	G	G	T	T	T
SALUMPIKIT::IRTP 4777-C1::[IRIS 313-7769]	IRIS 313-7769	IRGC 122236	indx	1	C	SALUMPIKIT::IRTP 4777-C1::[IRIS 313-7769]	IRIS 313-7769	IRGC 122236	indx	18	C	T	T	-	-	-	C	C	C	T	C	-	-	-	-	A	A	G	C	T	T	-	A	-	G	G	C	T	T	C	G	T	G	G	G	G	G	-	-
SONA::IRGC 26971-C1::[IRIS 313-7780]	IRIS 313-7780	IRGC 122255	indx	1	C	SONA::IRGC 26971-C1::[IRIS 313-7780]	IRIS 313-7780	IRGC 122255	indx	10	C	T	T	-	-	-	C	C	C	T	C	-	-	-	-	C	-	G	C	T	T	-	A	-	G	G	C	T	T	C	G	T	G	G	G	G	G	-	-
TSIPALA 1231::GERVEX 8418-C1::[IRIS 313-7792]	IRIS 313-7792	IRGC 124425	indx	1	C	TSIPALA 1231::GERVEX 8418-C1::[IRIS 313-7792]	IRIS 313-7792	IRGC 124425	indx	12	C	T	T	-	-	-	C	C	C	T	C	-	-	-	-	A	A	G	C	T	T	-	A	-	G	G	C	T	T	C	G	T	G	G	G	G	T	T	T
TSIPALA B 160::GERVEX 8378-C1::[IRIS 313-7793]	IRIS 313-7793	IRGC 124426	ind2	1	C	TSIPALA B 160::GERVEX 8378-C1::[IRIS 313-7793]	IRIS 313-7793	IRGC 124426	ind2	21	C	T	T	-	-	-	C	C	C	T	C	-	-	-	-	A	A	G	C	T	T	-	A	-	G	G	C	T	T	C	G	T	G	G	G	G	T	T	T
TSIPALA MENA 626::GERVEX 5392-C1::[IRIS 313-7795]	IRIS 313-7795	IRGC 124427	ind2	1	C	TSIPALA MENA 626::GERVEX 5392-C1::[IRIS 313-7795]	IRIS 313-7795	IRGC 124427	ind2	18	C	T	T	-	-	-	C	C	C	T	C	-	-	-	-	C	-	G	C	T	T	-	A	-	G	G	C	T	T	C	G	T	G	G	G	G	G	-	-
WAS 170-B-B-1-1::C1::[IRIS 313-7807]	IRIS 313-7807	IRGC 122284	ind1B	1	C	WAS 170-B-B-1-1::C1::[IRIS 313-7807]	IRIS 313-7807	IRGC 122284	ind1B	24	C	T	T	-	-	-	C	C	C	T	C	-	-	-	-	C	-	G	C	T	T	-	A	-	G	G	C	T	T	C	G	T	G	G	G	G	T	T	T
WAS 174-B-3-5::C1::[IRIS 313-7809]	IRIS 313-7809	IRGC 122286	indx	1	C	WAS 174-B-3-5::C1::[IRIS 313-7809]	IRIS 313-7809	IRGC 122286	indx	23	C	T	T	-	-	-	C	C	C	T	C	-	-	-	-	A	A	G	C	T	T	-	A	-	G	G	C	T	T	C	G	T	G	G	G	G	T	T	T
WAS 199-B-1-2-1::C1::[IRIS 313-7816]	IRIS 313-7816	IRGC 122288	ind1B	1	C	WAS 199-B-1-2-1::C1::[IRIS 313-7816]	IRIS 313-7816	IRGC 122288	ind1B	22	C	T	T	-	-	-	C	C	C	T	C	-	-	-	-	A	A	G	C	T	T	-	A	-	G	G	C	T	T	C	G	T	G	G	G	G	T	T	T
IR 68704-145-1-1-B::C1::[IRIS 313-7907]	IRIS 313-7907	IRGC 122108	trop	1	C	IR 68704-145-1-1-B::C1::[IRIS 313-7907]	IRIS 313-7907	IRGC 122108	trop	14	C	T	T	-	-	-	C	C	C	T	C	-	-	-	-	A	A	G	C	T	T	-	A	-	G	G	C	T	T	C	G	T	G	G	G	G	G	-	-
POKKALI::IRGC 8948-1::[IRIS 313-8244]	IRIS 313-8244	IRGC 126002	ind2	1	C	POKKALI::IRGC 8948-1::[IRIS 313-8244]	IRIS 313-8244	IRGC 126002	ind2	19	C	T	T	-	-	-	C	C	C	T	C	-	-	-	-	C	-	G	C	T	T	-	A	-	G	G	C	T	T	C	G	T	G	G	G	G	T	T	T
CHHOTE DHAN::[IRIS 313-8268]	IRIS 313-8268	IRGC 117446	aro	1	C	CHHOTE DHAN::[IRIS 313-8268]	IRIS 313-8268	IRGC 117446	aro	19	C	T	T	-	-	-	C	C	C	T	C	-	-	-	-	A	A	G	C	T	T	-	A	-	G	G	C	T	T	C	G	T	G	G	G	G	G	-	-
SAGNADE::IRGC 15801-1::[IRIS 313-8293]	IRIS 313-8293	IRGC 132432	ind3	1	C	SAGNADE::IRGC 15801-1::[IRIS 313-8293]	IRIS 313-8293	IRGC 132432	ind3	37	C	T	T	-	-	-	C	C	C	T	C	-	-	-	-	A	A	G	C	T	T	-	A	-	G	G	C	T	T	C	G	T	G	G	G	G	T	T	T
SURMATIYA::IRGC 74779-1::[IRIS 313-8303]	IRIS 313-8303	IRGC 126008	ind2	1	C	SURMATIYA::IRGC 74779-1::[IRIS 313-8303]	IRIS 313-8303	IRGC 126008	ind2	9	C	T	T	-	-	-	C	C	C	T	C	-	-	-	-	C	-	G	C	T	T	-	A	-	G	G	C	T	T	C	G	T	G	G	G	G	G	-	-
GENE::IRGC 67434-1::[IRIS 313-8383]	IRIS 313-8383	IRGC 125964	indx	1	C	GENE::IRGC 67434-1::[IRIS 313-8383]	IRIS 313-8383	IRGC 125964	indx	8	C	T	T	-	-	-	C	C	C	T	C	-	-	-	-	C	-	G	C	T	T	-	A	-	G	G	C	T	T	C	G	T	G	G	G	G	G	-	-
ARC 10812::IRGC 21074-1::[IRIS 313-8386]	IRIS 313-8386	IRGC 126173	indx	1	C	ARC 10812::IRGC 21074-1::[IRIS 313-8386]	IRIS 313-8386	IRGC 126173	indx	29	C	T	T	-	-	-	C	C	C	T	C	-	-	-	-	A	A	G	C	T	T	-	A	-	G	G	C	T	T	C	G	T	G	G	G	G	T	T	T
JIN JUN DAO::IRGC 59710-1::[IRIS 313-8405]	IRIS 313-8405	IRGC 125613	indx	1	C	JIN JUN DAO::IRGC 59710-1::[IRIS 313-8405]	IRIS 313-8405	IRGC 125613	indx	19	C	T	T	-	-	-	C	C	C	T	C	-	-	-	-	A	A	G	C	T	T	-	A	-	G	G	C	T	T	C	G	T	G	G	G	G	T	T	T
NACHIN ER 12::IRGC 14146-1::[IRIS 313-8407]	IRIS 313-8407		ind3	1	C	NACHIN ER 12::IRGC 14146-1::[IRIS 313-8407]	IRIS 313-8407		ind3	29	C	T	T	-	-	-	C	C	C	T	C	-	-	-	-	A	A	G	C	T	T	-	A	-	G	G	C	T	T	C	G	T	G	G	G	G	T	T	T
ARC 18202::IRGC 42328-1::[IRIS 313-8414]	IRIS 313-8414	IRGC 126175	indx	1	C	ARC 18202::IRGC 42328-1::[IRIS 313-8414]	IRIS 313-8414	IRGC 126175	indx	19	C	T	T	-	-	-	C	C	C	T	C	-	-	-	-	A	A	G	C	T	T	-	A	-	G	G	C	T	T	C	G	T	G	G	G	G	G	-	-
IRRIBINI::IRGC 49094-1::[IRIS 313-8437]	IRIS 313-8437	IRGC 126215	indx	1	C	IRRIBINI::IRGC 49094-1::[IRIS 313-8437]	IRIS 313-8437	IRGC 126215	indx	21	C	T	T	-	-	-	C	C	C	T	C	-	-	-	-	A	A	G	C	T	T	-	A	-	G	G	C	T	T	C	G	T	G	G	G	G	G	-	-
498-2A BR 8::IRGC 5891-1::[IRIS 313-8450]	IRIS 313-8450	IRGC 126041	ind2	1	C	498-2A BR 8::IRGC 5891-1::[IRIS 313-8450]	IRIS 313-8450	IRGC 126041	ind2	10	C	T	T	-	-	-	C	C	C	T	C	-	-	-	-	C	-	G	C	T	T	-	A	-	G	G	C	T	T	C	G	T	G	G	G	G	G	-	-
ARC 18597::IRGC 43299-1::[IRIS 313-8453]	IRIS 313-8453	IRGC 126043	indx	1	C	ARC 18597::IRGC 43299-1::[IRIS 313-8453]	IRIS 313-8453	IRGC 126043	indx	21	C	T	T	-	-	-	C	C	C	T	C	-	-	-	-	A	A	G	C	T	T	-	A	-	G	G	C	T	T	C	G	T	G	G	G		T	T	T
NAM SA GUI 19::[IRIS 313-8485]	IRIS 313-8485	IRGC 117536	ind3	1	C	NAM SA GUI 19::[IRIS 313-8485]	IRIS 313-8485	IRGC 117536	ind3	16	C	T	T	-	-	-	C	C	C	T	C	-	-	-	-	A	A	G	C	T	T	-	A	-	G	G	C	T	T	C	G	T	G	G	G	G	G	-	-
SINERBESA::IRGC 38711-1::[IRIS 313-8567]	IRIS 313-8567		ind3	1	C	SINERBESA::IRGC 38711-1::[IRIS 313-8567]	IRIS 313-8567		ind3	17	C	T	T	-	-	-	C	C	C	T	C	-	-	-	-	A	A	G	C	T	T	-	A	-	G	G	C	T	T	C	G	T	G	G	G	G	T	T	T
AC 13 (T 141)::IRGC 5456-1::[IRIS 313-8606]	IRIS 313-8606	IRGC 131926	ind3	1	C	AC 13 (T 141)::IRGC 5456-1::[IRIS 313-8606]	IRIS 313-8606	IRGC 131926	ind3	29	C	T	T	-	-	-	C	C	C	T	C	-	-	-	-	A	A	G	C	T	T	-	A	-	G	G	C	T	T	C	G	T	G	G	G	G	T	T	T
RAJHUSAI (ACR 12)::IRGC 53630-1::[IRIS 313-8614]	IRIS 313-8614	IRGC 126264	ind2	1	C	RAJHUSAI (ACR 12)::IRGC 53630-1::[IRIS 313-8614]	IRIS 313-8614	IRGC 126264	ind2	16	C	T	T	-	-	-	C	C	C	T	C	-	-	-	-	C	-	G	C	T	T	-	A	-	G	G	C	T	T	C	G	T	G	G	G	G	G	-	-
PATMADHAI 1::IRGC 77292-1::[IRIS 313-8632]	IRIS 313-8632		ind2	1	C	PATMADHAI 1::IRGC 77292-1::[IRIS 313-8632]	IRIS 313-8632		ind2	17	C	T	T	-	-	-	C	C	C	T	C	-	-	-	-			G	C	T	T	-	A	-	G	G	C	T	T	C	G	T	G	G	G	G	G	-	-
Na souan::IRGC 11889-1::[IRIS 313-8638]	IRIS 313-8638	IRGC 126250	ind3	1	C	Na souan::IRGC 11889-1::[IRIS 313-8638]	IRIS 313-8638	IRGC 126250	ind3	21	C	T	T	-	-	-	C	C	C	T	C	-	-	-	-	A	A	G	C	T	T	-	A	-	G	G	C	T	T	C	G	T	G	G	G	G	T	T	T
DAJA::IRGC 17440-1::[IRIS 313-8643]	IRIS 313-8643	IRGC 131935	ind3	1	C	DAJA::IRGC 17440-1::[IRIS 313-8643]	IRIS 313-8643	IRGC 131935	ind3	17	C	T	T	-	-	-	C	C	C	T	C	-	-	-	-	A	A	G	C	T	T	-	A	-	G	G	C	T	T	C	G	T	G	G	G	G	T	T	T
PAI YI PING::IRGC 1368-1::[IRIS 313-8645]	IRIS 313-8645	IRGC 126122	ind1A	1	C	PAI YI PING::IRGC 1368-1::[IRIS 313-8645]	IRIS 313-8645	IRGC 126122	ind1A	16	C	T	T	-	-	-	C	C	C	T	C	-	-	-	-	C	-	G	C	T	T	-	A	-	G	G	C	T	T	C	G	T	G		G	G	G	-	-
CO 19::IRGC 5905-1::[IRIS 313-8657]	IRIS 313-8657	IRGC 135525	indx	1	C	CO 19::IRGC 5905-1::[IRIS 313-8657]	IRIS 313-8657	IRGC 135525	indx	15	C	T	T	-	-	-	C	C	C	T	C	-	-	-	-	C	-	G	C	T	T	-	A	-	G	G	C	T	T	C	G	T	G	G	G	G	G	-	-
YA THAY SAN::IRGC 58245-1::[IRIS 313-8659]	IRIS 313-8659		indx	1	C	YA THAY SAN::IRGC 58245-1::[IRIS 313-8659]	IRIS 313-8659		indx	28	C	T	T	-	-	-	C	C	C	T	C	-	-	-	-	A	A	G	C	T	T	-	A	-	G	G	C	T	T	C	G	T	G	G	G	G	T	T	T
JOTA BITCHI 1::IRGC 77253-1::[IRIS 313-8683]	IRIS 313-8683	IRGC 135532	ind2	1	C	JOTA BITCHI 1::IRGC 77253-1::[IRIS 313-8683]	IRIS 313-8683	IRGC 135532	ind2	21	C	T	T	-	-	-	C	C	C	T	C	-	-	-	-	C	-	G	C	T	T	-	A	-	G	G	C	T	T	C	G	T	G	G	G	G	T	T	T
DA 7::[IRIS 313-8703]	IRIS 313-8703	IRGC 124432	ind2	1	C	DA 7::[IRIS 313-8703]	IRIS 313-8703	IRGC 124432	ind2	29	C	T	T	-	-	-	C	C	C	T	C	-	-	-	-	A	A	G	C	T	T	-	A	-	G	G	C	T	T	C	G	T	G	G	G	G	T	T	T
NELI::IRGC 66603-1::[IRIS 313-8713]	IRIS 313-8713	IRGC 135538	ind3	1	C	NELI::IRGC 66603-1::[IRIS 313-8713]	IRIS 313-8713	IRGC 135538	ind3	13	C	T	T	-	-	-	C	C	C	T	C	-	-	-	-	A	A	G	C	T	T	-	A	-	G	G	C	T	T	C	G	T	G	G	G	G	G	-	-
HAWM TOONG::IRGC 48007-1::[IRIS 313-8722]	IRIS 313-8722		ind3	1	C	HAWM TOONG::IRGC 48007-1::[IRIS 313-8722]	IRIS 313-8722		ind3	15	C	T	T	-	-	-	C	C	C	T	C	-	-	-	-	C	-	G	C	T	T	-	A	-	G	G	C	T	T	C	G	T	G	G	G	G	G	-	-
KUTAI PAYA::IRGC 19528-1::[IRIS 313-8723]	IRIS 313-8723	IRGC 126033	ind3	1	C	KUTAI PAYA::IRGC 19528-1::[IRIS 313-8723]	IRIS 313-8723	IRGC 126033	ind3	11	C	T	T	-	-	-	C	C	C	T	C	-	-	-	-	C	-	G	C	T	T	-	A	-	G	G	C	T	T	C	G	T	G	G	G	G	G	-	-
PULUT BARAYA::IRGC 27393-1::[IRIS 313-8725]	IRIS 313-8725	IRGC 126262	ind3	1	C	PULUT BARAYA::IRGC 27393-1::[IRIS 313-8725]	IRIS 313-8725	IRGC 126262	ind3	29	C	T	T	-	-	-	C	C	C	T	C	-	-	-	-	A	A	G	C	T	T	-	A	-	G	G	C	T	T	C	G	T	G	G	G	G	T	T	T
NOLOS::IRGC 77285-1::[IRIS 313-8733]	IRIS 313-8733		ind2	1	C	NOLOS::IRGC 77285-1::[IRIS 313-8733]	IRIS 313-8733		ind2	21	C	T	T	-	-	-	C	C	C	T	C	-	-	-	-	A	A	G	C	T	T	-	A	-	G	G	C	T	T	C	G	T	G	G	G	G	T	T	T
SADAJIRA 19-287::IRGC 38320-1::[IRIS 313-8737]	IRIS 313-8737	IRGC 126270	ind2	1	C	SADAJIRA 19-287::IRGC 38320-1::[IRIS 313-8737]	IRIS 313-8737	IRGC 126270	ind2	15	C	T	T	-	-	-	C	C	C	T	C	-	-	-	-	C	-	G	C	T	T	-	A	-	G	G	C	T	T	C	G	T	G	G	G	G	T	T	T
REMOL::IRGC 18624-1::[IRIS 313-8744]	IRIS 313-8744	IRGC 126266	ind3	1	C	REMOL::IRGC 18624-1::[IRIS 313-8744]	IRIS 313-8744	IRGC 126266	ind3	9	C	T	T	-	-	-	C	C	C	T	C	-	-	-	-	A	A	G	C	T	T	-	A	-	G	G	C	T	T	C	G	T	G	G	G	G	G	-	-
HNANWA::IRGC 33118-1::[IRIS 313-8751]	IRIS 313-8751	IRGC 126209	ind3	1	C	HNANWA::IRGC 33118-1::[IRIS 313-8751]	IRIS 313-8751	IRGC 126209	ind3	23	C	T	T	-	-	-	C	C	C	T	C	-	-	-	-	A	A	G	C	T	T	-	A	-	G	G	C	T	T	C	G	T	G	G	G	G	T	T	T
TIMMURAY::IRGC 67857-1::[IRIS 313-8765]	IRIS 313-8765	IRGC 126284	aro	1	C	TIMMURAY::IRGC 67857-1::[IRIS 313-8765]	IRIS 313-8765	IRGC 126284	aro	10	C	T	T	-	-	-	C	C	C	T	C	-	-	-	-	A	A	G	C	T	T	-	A	-	G	G	C	T	T	C	G	T	G	G	G	G	G	-	-
ARC 14060::IRGC 41374-1::[IRIS 313-8844]	IRIS 313-8844	IRGC 125648	ind2	1	C	ARC 14060::IRGC 41374-1::[IRIS 313-8844]	IRIS 313-8844	IRGC 125648	ind2	16	C	T	T	-	-	-	C	C	C	T	C	-	-	-	-	C	-	G	C	T	T	-	A	-	G	G	C	T	T	C	G	T	G	G	G	G	T	T	T
CHAKOL::IRGC 77226-1::[IRIS 313-8854]	IRIS 313-8854	IRGC 125696	ind2	1	C	CHAKOL::IRGC 77226-1::[IRIS 313-8854]	IRIS 313-8854	IRGC 125696	ind2	13	C	T	T	-	-	-	C	C	C	T	C	-	-	-	-	C	-	G	C	T	T	-	A	-	G	G	C	T	T	C	G	T	G	G	G	G	G	-	-
LU MAO ZHAN::IRGC 68159-1::[IRIS 313-8889]	IRIS 313-8889	IRGC 125829	indx	1	C	LU MAO ZHAN::IRGC 68159-1::[IRIS 313-8889]	IRIS 313-8889	IRGC 125829	indx	16	C	T	T	-	-	-	C	C	C	T	C	-	-	-	-	C	-	G	C	T	T	-	A	-	G	G	C	T	T	C	G	T	G	G	G	G	G	-	-
FAYA MOSHI::IRGC 69653-1::[IRIS 313-8909]	IRIS 313-8909	IRGC 125740	ind3	1	C	FAYA MOSHI::IRGC 69653-1::[IRIS 313-8909]	IRIS 313-8909	IRGC 125740	ind3	27	C	T	T	-	-	-	C	C	C	T	C	-	-	-	-	A	A	G	C	T	T	-	A	-	G	G	C	T	T	C	G	T	G	G	G	G	G	-	-
E 2040::IRGC 67968-1::[IRIS 313-8914]	IRIS 313-8914	IRGC 125731	indx	1	C	E 2040::IRGC 67968-1::[IRIS 313-8914]	IRIS 313-8914	IRGC 125731	indx	27	C	T	T	-	-	-	C	C	C	T	C	-	-	-	-	A	A	G	C	T	T	-	A	-	G	G	C	T	T	C	G	T	G	G	G	G	T	T	T
RADEN KARAMUNTING::IRGC 20098-1::[IRIS 313-8956]	IRIS 313-8956	IRGC 125882	ind3	1	C	RADEN KARAMUNTING::IRGC 20098-1::[IRIS 313-8956]	IRIS 313-8956	IRGC 125882	ind3	29	C	T	T	-	-	-	C	C	C	T	C	-	-	-	-	A	A	G	C	T	T	-	A	-	G	G	C	T	T	C	G	T	G	G	G	G	T	T	T
BAM 9::IRGC 6179-1::[IRIS 313-8957]	IRIS 313-8957	IRGC 125670	ind2	1	C	BAM 9::IRGC 6179-1::[IRIS 313-8957]	IRIS 313-8957	IRGC 125670	ind2	23	C	T	T	-	-	-	C	C	C	T	C	-	-	-	-	A	A	G	C	T	T	-	A	-	G	G	C	T	T	C	G	T	G	G	G	G	G	-	-
IE MATA CICEM::IRGC 66562-1::[IRIS 313-8978]	IRIS 313-8978		ind3	1	C	IE MATA CICEM::IRGC 66562-1::[IRIS 313-8978]	IRIS 313-8978		ind3	21	C	T	T	-	-	-	C	C	C	T	C	-	-	-	-	A	A	G	C	T	T	-	A	-	G	G	C	T	T	C	G	T	G	G	G	G	T	T	T
E DAW HAWM::IRGC 47938-1::[IRIS 313-8980]	IRIS 313-8980	IRGC 126132	ind3	1	C	E DAW HAWM::IRGC 47938-1::[IRIS 313-8980]	IRIS 313-8980	IRGC 126132	ind3	18	C	T	T	-	-	-	C	C	C	T	C	-	-	-	-	A	A	G	C	T	T	-	A	-	G	G	C	T	T	C	G	T	G	G	G	G	G	-	-
ARC 10754::IRGC 12603-1::[IRIS 313-8986]	IRIS 313-8986	IRGC 125637	indx	1	C	ARC 10754::IRGC 12603-1::[IRIS 313-8986]	IRIS 313-8986	IRGC 125637	indx	21	C	T	T	-	-	-	C	C	C	T	C	-	-	-	-	A	A	G	C	T	T	-	A	-	G	G	C	T	T	C	G	T	G	G	G	G	T	T	T
ARC 14064::IRGC 41377-1::[IRIS 313-8994]	IRIS 313-8994	IRGC 125649	indx	1	C	ARC 14064::IRGC 41377-1::[IRIS 313-8994]	IRIS 313-8994	IRGC 125649	indx	19	C	T	T	-	-	-	C	C	C	T	C	-	-	-	-	A	A	G	C	T	T	-	A	-	G	G	C	T	T	C	G	T	G	G	G	G	G	-	-
TJERE SUGI::IRGC 16650-1::[IRIS 313-9005]	IRIS 313-9005	IRGC 132376	ind3	1	C	TJERE SUGI::IRGC 16650-1::[IRIS 313-9005]	IRIS 313-9005	IRGC 132376	ind3	23	C	T	T	-	-	-	C	C	C	T	C	-	-	-	-	A	A	G	C	T	T	-	A	-	G	G	C	T	T	C	G	T	G	G	G	G	T	T	T
PING SHAN TA TSWEN KU::IRGC 1563-1::[IRIS 313-9017]	IRIS 313-9017	IRGC 126988	indx	1	C	PING SHAN TA TSWEN KU::IRGC 1563-1::[IRIS 313-9017]	IRIS 313-9017	IRGC 126988	indx	9	C	T	T	-	-	-	C	C	C	T	C	-	-	-	-	C	-	G	C	T	T	-	A	-	G	G	C	T	T	C	G	T	G	G	G	G	G	-	-
KAM PAI::IRGC 78245-1::[IRIS 313-9019]	IRIS 313-9019	IRGC 126152	ind3	1	C	KAM PAI::IRGC 78245-1::[IRIS 313-9019]	IRIS 313-9019	IRGC 126152	ind3	21	C	T	T	-	-	-	C	C	C	T	C	-	-	-	-	A	A	G	C	T	T	-	A	-	G	G	C	T	T	C	G	T	G	G	G	G	G	-	-
LEUANG CHAIYAPHUM::IRGC 78266-1::[IRIS 313-9020]	IRIS 313-9020	IRGC 126983	ind3	1	C	LEUANG CHAIYAPHUM::IRGC 78266-1::[IRIS 313-9020]	IRIS 313-9020	IRGC 126983	ind3	23	C	T	T	-	-	-	C	C	C	T	C	-	-	-	-	A	A	G	C	T	T	-	A	-	G	G	C	T	T	C	G	T	G	G	G	G	T	T	T
IR 2071-586-5-6-3::IRGC 39291-1::[IRIS 313-9044]	IRIS 313-9044	IRGC 125971	ind1B	1	C	IR 2071-586-5-6-3::IRGC 39291-1::[IRIS 313-9044]	IRIS 313-9044	IRGC 125971	ind1B	19	C	T	T	-	-	-	C	C	C	T	C	-	-	-	-	A	A	G	C	T	T	-	A	-	G	G	C	T	T	C	G	T	G	G	G	G	T	T	T
BIDAPIK::IRGC 43354-1::[IRIS 313-9054]	IRIS 313-9054	IRGC 131933	ind3	1	C	BIDAPIK::IRGC 43354-1::[IRIS 313-9054]	IRIS 313-9054	IRGC 131933	ind3	18	C	T	T	-	-	-	C	C	C	T	C	-	-	-	-	C	-	G	C	T	T	-	A	-	G	G	C	T	T	C	G	T	G	G	G	G	T	T	T
BHOJON KOLPO::IRGC 31727-1::[IRIS 313-9067]	IRIS 313-9067	IRGC 125681	ind2	1	C	BHOJON KOLPO::IRGC 31727-1::[IRIS 313-9067]	IRIS 313-9067	IRGC 125681	ind2	29	C	T	T	-	-	-	C	C	C	T	C	-	-	-	-	A	A	G	C	T	T	-	A	-	G	G	C	T	T	C	G	T	G	G	G	G	T	T	T
CANTIK PAUN::IRGC 66538-1::[IRIS 313-9097]	IRIS 313-9097		ind3	1	C	CANTIK PAUN::IRGC 66538-1::[IRIS 313-9097]	IRIS 313-9097		ind3	21	C	T	T	-	-	-	C	C	C	T	C	-	-	-	-	A	A	G	C	T	T	-	A	-	G	G	C	T	T	C	G	T	G	G	G	G	G	-	-
MANUS::IRGC 71570-1::[IRIS 313-9102]	IRIS 313-9102		ind3	1	C	MANUS::IRGC 71570-1::[IRIS 313-9102]	IRIS 313-9102		ind3	27	C	T	T	-	-	-	C	C	C	T	C	-	-	-	-	A	A	G	C	T	T	-	A	-	G	G	C	T	T	C	G	T	G	G	G	G	T	T	T
XIA ZHI BAI::IRGC 53437-1::[IRIS 313-9111]	IRIS 313-9111	IRGC 125940	ind1A	1	C	XIA ZHI BAI::IRGC 53437-1::[IRIS 313-9111]	IRIS 313-9111	IRGC 125940	ind1A	17	C	T	T	-	-	-	C	C	C	T	C	-	-	-	-	C	-	G	C	T	T	-	A	-	G	G	C	T	T	C	G	T	G	G	G	G	G	-	-
DOC PHUNG D 12::IRGC 10234-1::[IRIS 313-9131]	IRIS 313-9131	IRGC 135749	ind3	1	C	DOC PHUNG D 12::IRGC 10234-1::[IRIS 313-9131]	IRIS 313-9131	IRGC 135749	ind3	21	C	T	T	-	-	-	C	C	C	T	C	-	-	-	-	A	A	G	C	T	T	-	A	-	G	G	C	T	T	C	G	T	G	G	G	G	T	T	T
DHOLA AMAN (LOWLAND AMAN)::IRGC 8341-1::[IRIS 313-9156]	IRIS 313-9156	IRGC 126200	ind2	1	C	DHOLA AMAN (LOWLAND AMAN)::IRGC 8341-1::[IRIS 313-9156]	IRIS 313-9156	IRGC 126200	ind2	23	C	T	T	-	-	-	C	C	C	T	C	-	-	-	-	A	A	G	C	T	T	-	A	-	G	G	C	T	T	C	G	T	G	G	G	G	T	T	T
TK DEEP STRAW 34-786::IRGC 38522-1::[IRIS 313-9170]	IRIS 313-9170		aro	1	C	TK DEEP STRAW 34-786::IRGC 38522-1::[IRIS 313-9170]	IRIS 313-9170		aro	19	C	T	T	-	-	-	C	C	C	T	C	-	-	-	-	A	A	G	C	T	T	-	A	-	G	G	C	T	T	C	G	T	G	G	G	G	G	-	-
KUSHIARA::IRGC 34709-1::[IRIS 313-9174]	IRIS 313-9174	IRGC 125814	ind2	1	C	KUSHIARA::IRGC 34709-1::[IRIS 313-9174]	IRIS 313-9174	IRGC 125814	ind2	17	C	T	T	-	-	-					C	-	-	-	-	A	A	G	C	T	T	-	A	-	G	G	C	T	T	C	G	T	G	G	G	G	T	T	T
GABAHSI RASAKI C 90::IRGC 49647-1::[IRIS 313-9197]	IRIS 313-9197	IRGC 126205	ind3	1	C	GABAHSI RASAKI C 90::IRGC 49647-1::[IRIS 313-9197]	IRIS 313-9197	IRGC 126205	ind3	15	C	T	T	-	-	-	C	C	C	T	C	-	-	-	-	A	A	G	C	T	T	-	A	-	G	G	C	T	T	C	G	T	G	G	G	G	T	T	T
LEUANG LAI MAE PRAJAN::IRGC 71279-1::[IRIS 313-9209]	IRIS 313-9209	IRGC 126984	ind3	1	C	LEUANG LAI MAE PRAJAN::IRGC 71279-1::[IRIS 313-9209]	IRIS 313-9209	IRGC 126984	ind3	13	C	T	T	-	-	-	C	C	C	T	C	-	-	-	-	C	-	G	C	T	T	-	A	-	G	G	C	T	T	C	G	T	G	G	G	G	G	-	-
KUATEK::IRGC 14285-1::[IRIS 313-9210]	IRIS 313-9210	IRGC 131915	ind3	1	C	KUATEK::IRGC 14285-1::[IRIS 313-9210]	IRIS 313-9210	IRGC 131915	ind3	21	C	T	T	-	-	-	C	C	C	T	C	-	-	-	-	A	A	G	C	T	T	-	A	-	G	G	C	T	T	C	G	T	G	G	G	G	T	T	T
KALO CHAKOL::IRGC 77258-1::[IRIS 313-9218]	IRIS 313-9218	IRGC 126136	ind2	1	C	KALO CHAKOL::IRGC 77258-1::[IRIS 313-9218]	IRIS 313-9218	IRGC 126136	ind2	14	C	T	T	-	-	-	C	C	C	T	C	-	-	-	-	C	-	G	C	T	T	-	A	-	G	G	C	T	T	C	G	T	G	G	G	G	T	T	T
MACAN BINUNDOK::IRGC 8245-1::[IRIS 313-9243]	IRIS 313-9243	IRGC 126239	indx	1	C	MACAN BINUNDOK::IRGC 8245-1::[IRIS 313-9243]	IRIS 313-9243	IRGC 126239	indx	19	C	T	T	-	-	-	C	C	C	T	C	-	-	-	-	A	A	G	C	T	T	-	A	-	G	G	C	T	T	C	G	T	G	G	G	G	G	-	-
PURA BINNI::IRGC 26772-1::[IRIS 313-9271]	IRIS 313-9271	IRGC 125878	ind2	1	C	PURA BINNI::IRGC 26772-1::[IRIS 313-9271]	IRIS 313-9271	IRGC 125878	ind2	20	C	T	T	-	-	-	C	C	C	T	C	-	-	-	-	A	A	G	C	T	T	-	A	-	G	G	C	T	T	C	G	T	G	G	G	G	T	T	T
RADEN SAWO 1::IRGC 57578-1::[IRIS 313-9273]	IRIS 313-9273		ind3	1	C	RADEN SAWO 1::IRGC 57578-1::[IRIS 313-9273]	IRIS 313-9273		ind3	18	C	T	T	-	-	-	C	C	C	T	C	-	-	-	-	C	-	G	C	T	T	-	A	-	G	G	C	T	T	C	G	T	G	G	G	G	T	T	T
GAM PAI 30-12-15::IRGC 831-1::[IRIS 313-9302]	IRIS 313-9302	IRGC 125747	ind3	1	C	GAM PAI 30-12-15::IRGC 831-1::[IRIS 313-9302]	IRIS 313-9302	IRGC 125747	ind3	26	C	T	T	-	-	-	C	C	C	T	C	-	-	-	-	C	-	G	C	T	T	-	A	-	G	G	C	T	T	C	G	T	G	G	G	G	T	T	T
KAAKARAN::IRGC 27138-1::[IRIS 313-9314]	IRIS 313-9314		indx	1	C	KAAKARAN::IRGC 27138-1::[IRIS 313-9314]	IRIS 313-9314		indx	17	C	T	T	-	-	-	C	C	C	T	C	-	-	-	-	A	A	G	C	T	T	-	A	-	G	G	C	T	T	C	G	T	G	G	G	G	T	T	T
CHIH SHEN LI::IRGC 1306-1::[IRIS 313-9324]	IRIS 313-9324	IRGC 125702	ind1A	1	C	CHIH SHEN LI::IRGC 1306-1::[IRIS 313-9324]	IRIS 313-9324	IRGC 125702	ind1A	22	C	T	T	-	-	-	C	C	C	T	C	-	-	-	-	A	A	G	C	T	T	-	A	-	G	G	C	T	T	C	G	T	G	G	G	G	T	T	T
KERITING TINGGI::IRGC 19972-1::[IRIS 313-9329]	IRIS 313-9329	IRGC 131941	ind3	1	C	KERITING TINGGI::IRGC 19972-1::[IRIS 313-9329]	IRIS 313-9329	IRGC 131941	ind3	29	C	T	T	-	-	-	C	C	C	T	C	-	-	-	-	A	A	G	C	T	T	-	A	-	G	G	C	T	T	C	G	T	G	G	G	G	T	T	T
BK 26::IRGC 45197-1::[IRIS 313-9348]	IRIS 313-9348	IRGC 125684	ind2	1	C	BK 26::IRGC 45197-1::[IRIS 313-9348]	IRIS 313-9348	IRGC 125684	ind2	19	C	T	T	-	-	-	C	C	C	T	C	-	-	-	-	A	A	G	C	T	T	-	A	-	G	G	C	T	T	C	G	T	G	G	G	G	T	T	T
WI BIR SHUN::IRGC 4602-1::[IRIS 313-9372]	IRIS 313-9372	IRGC 125937	ind1A	1	C	WI BIR SHUN::IRGC 4602-1::[IRIS 313-9372]	IRIS 313-9372	IRGC 125937	ind1A	25	C	T	T	-	-	-	C	C	C	T	C	-	-	-	-	A	A	G	C	T	T	-	A	-	G	G	C	T	T	C	G	T	G	G	G	G	G	-	-
BARIK KUDI::IRGC 52807-1::[IRIS 313-9384]	IRIS 313-9384	IRGC 125674	ind2	1	C	BARIK KUDI::IRGC 52807-1::[IRIS 313-9384]	IRIS 313-9384	IRGC 125674	ind2	21	C	T	T	-	-	-	C	C	C	T	C	-	-	-	-	A	A	G	C	T	T	-	A	-	G	G	C	T	T	C	G	T	G	G	G	G	T	T	T
KALABAIL::IRGC 25877-1::[IRIS 313-9391]	IRIS 313-9391	IRGC 125789	ind2	1	C	KALABAIL::IRGC 25877-1::[IRIS 313-9391]	IRIS 313-9391	IRGC 125789	ind2	23	C	T	T	-	-	-	C	C	C	T	C	-	-	-	-	A	A	G	C	T	T	-	A	-	G	G	C	T	T	C	G	T	G	G	G	G	T	T	T
DUDHSWAR 15-141::IRGC 37951-1::[IRIS 313-9397]	IRIS 313-9397		ind2	1	C	DUDHSWAR 15-141::IRGC 37951-1::[IRIS 313-9397]	IRIS 313-9397		ind2	21	C	T	T	-	-	-	C	C	C	T	C	-	-	-	-	A	A	G	C	T	T	-	A	-	G	G	C	T	T	C	G	T	G	G	G	G	G	-	-
LEUANG SAWED::IRGC 78268-1::[IRIS 313-9406]	IRIS 313-9406		ind3	1	C	LEUANG SAWED::IRGC 78268-1::[IRIS 313-9406]	IRIS 313-9406		ind3	28	C	T	T	-	-	-	C	C	C	T	C	-	-	-	-	A	A	G	C	T	T	-	A	-	G	G	C	T	T	C	G	T	G	G	G	G	T	T	T
GUMPANGAR::IRGC 71524-1::[IRIS 313-9409]	IRIS 313-9409	IRGC 131937	ind3	1	C	GUMPANGAR::IRGC 71524-1::[IRIS 313-9409]	IRIS 313-9409	IRGC 131937	ind3	37	C	T	T	-	-	-	C	C	C	T	C	-	-	-	-	A	A	G	C	T	T	-	A	-	G	G	C	T	T	C	G	T	G	G	G	G	T	T	T
ARC 18092::IRGC 42256-1::[IRIS 313-9427]	IRIS 313-9427	IRGC 125654	indx	1	C	ARC 18092::IRGC 42256-1::[IRIS 313-9427]	IRIS 313-9427	IRGC 125654	indx	23	C	T	T	-	-	-	C	C	C	T	C	-	-	-	-	A	A	G	C	T	T	-	A	-	G	G	C	T	T	C	G	T	G	G	G	G	T	T	T
GOKULGANJA::IRGC 45701-1::[IRIS 313-9433]	IRIS 313-9433	IRGC 126151	ind2	1	C	GOKULGANJA::IRGC 45701-1::[IRIS 313-9433]	IRIS 313-9433	IRGC 126151	ind2	19	C	T	T	-	-	-	C	C	C	T	C	-	-	-	-	A	A	G	C	T	T	-	A	-	G	G	C	T	T	C	G	T	G	G	G	G	G	-	-
PAMAH S 18::IRGC 61322-1::[IRIS 313-9451]	IRIS 313-9451	IRGC 126140	indx	1	C	PAMAH S 18::IRGC 61322-1::[IRIS 313-9451]	IRIS 313-9451	IRGC 126140	indx	13	C	T	T	-	-	-	C	C	C	T	C	-	-	-	-	A	A	G	C	T	T	-	A	-	G	G	C	T	T	C	G	T	G	G	G	G	G	-	-
KARANTABA 1::IRGC 15924-1::[IRIS 313-9461]	IRIS 313-9461	IRGC 125795	ind3	1	C	KARANTABA 1::IRGC 15924-1::[IRIS 313-9461]	IRIS 313-9461	IRGC 125795	ind3	13	C	T	T	-	-	-	C	C	C	T	C	-	-	-	-	A	A	G	C	T	T	-	A	-	G	G	C	T	T	C	G	T	G	G	G	G	T	T	T
E 2024::IRGC 67958-1::[IRIS 313-9482]	IRIS 313-9482	IRGC 125730	ind1B	1	C	E 2024::IRGC 67958-1::[IRIS 313-9482]	IRIS 313-9482	IRGC 125730	ind1B	14	C	T	T	-	-	-	C	C	C	T	C	-	-	-	-	A	A	G	C	T	T	-	A	-	G	G	C	T	T	C	G	T	G	G	G	G	T	T	T
CHNNOR::IRGC 67485-1::[IRIS 313-9484]	IRIS 313-9484	IRGC 125706	indx	1	C	CHNNOR::IRGC 67485-1::[IRIS 313-9484]	IRIS 313-9484	IRGC 125706	indx	17	C	T	T	-	-	-	C	C	C	T	C	-	-	-	-	A	A	G	C	T	T	-	A	-	G	G	C	T	T	C	G	T	G	G	G	G	G	-	-
NCS 237::IRGC 62202-1::[IRIS 313-9492]	IRIS 313-9492	IRGC 125853	ind2	1	C	NCS 237::IRGC 62202-1::[IRIS 313-9492]	IRIS 313-9492	IRGC 125853	ind2	18	C	T	T	-	-	-	C	C	C	T	C	-	-	-	-	A	A	G	C	T	T	-	A	-	G	G	C	T	T	C	G	T	G	G	G	G	G	-	-
KORASISI::IRGC 5285-1::[IRIS 313-9505]	IRIS 313-9505	IRGC 125809	ind1A	1	C	KORASISI::IRGC 5285-1::[IRIS 313-9505]	IRIS 313-9505	IRGC 125809	ind1A	23	C	T	T	-	-	-	C	C	C	T	C	-	-	-	-	A	A	G	C	T	T	-	A	-	G	G	C	T	T	C	G	T	G	G	G	G	T	T	T
KHAO CHUAN CHOM 452::IRGC 36571-1::[IRIS 313-9567]	IRIS 313-9567	IRGC 131914	ind3	1	C	KHAO CHUAN CHOM 452::IRGC 36571-1::[IRIS 313-9567]	IRIS 313-9567	IRGC 131914	ind3	20	C	T	T	-	-	-	C	C	C	T	C	-	-	-	-			G	C	T	T	-	A	-	G	G	C	T	T	C	G	T	G	G	G	G	T	T	T
SADOK::IRGC 13334-1::[IRIS 313-9582]	IRIS 313-9582	IRGC 131917	ind3	1	C	SADOK::IRGC 13334-1::[IRIS 313-9582]	IRIS 313-9582	IRGC 131917	ind3	13	C	T	T	-	-	-	C	C	C	T	C	-	-	-	-	A	A	G	C	T	T	-	A	-	G	G	C	T	T	C	G	T	G	G	G	G	G	-	-
KETAN SERANG::IRGC 14615-1::[IRIS 313-9590]	IRIS 313-9590	IRGC 125799	ind3	1	C	KETAN SERANG::IRGC 14615-1::[IRIS 313-9590]	IRIS 313-9590	IRGC 125799	ind3	29	C	T	T	-	-	-	C	C	C	T	C	-	-	-	-	A	A	G	C	T	T	-	A	-	G	G	C	T	T	C	G	T	G	G	G	G	T	T	T
ARC 15088::IRGC 41934-1::[IRIS 313-9593]	IRIS 313-9593	IRGC 125651	indx	1	C	ARC 15088::IRGC 41934-1::[IRIS 313-9593]	IRIS 313-9593	IRGC 125651	indx	28	C	T	T	-	-	-	C	C	C	T	C	-	-	-	-	C	-	G	C	T	T	-	A	-	G	G	C	T	T	C	G	T	G		G	G	T	T	T
ASHI BINNI::IRGC 77216-1::[IRIS 313-9594]	IRIS 313-9594	IRGC 126131	indx	1	C	ASHI BINNI::IRGC 77216-1::[IRIS 313-9594]	IRIS 313-9594	IRGC 126131	indx	29	C	T	T	-	-	-	C	C	C	T	C	-	-	-	-	A	A	G	C	T	T	-	A	-	G	G	C	T	T	C	G	T	G	G	G	G	T	T	T
DA 11::IRGC 6046-1::[IRIS 313-9606]	IRIS 313-9606	IRGC 124431	ind2	1	C	DA 11::IRGC 6046-1::[IRIS 313-9606]	IRIS 313-9606	IRGC 124431	ind2	21	C	T	T	-	-	-	C	C	C	T	C	-	-	-	-	A	A	G	C	T	T	-	A	-	G	G	C	T	T	C	G	T	G	G	G	G	T	T	T
ARC 10594::IRGC 12524-1::[IRIS 313-9609]	IRIS 313-9609	IRGC 125636	indx	1	C	ARC 10594::IRGC 12524-1::[IRIS 313-9609]	IRIS 313-9609	IRGC 125636	indx	17	C	T	T	-	-	-	C	C	C	T	C	-	-	-	-	A	A	G	C	T	T	-	A	-	G	G	C	T	T	C	G	T	G	G	G	G	T	T	T
ARC 15845::IRGC 42151-1::[IRIS 313-9619]	IRIS 313-9619		indx	1	C	ARC 15845::IRGC 42151-1::[IRIS 313-9619]	IRIS 313-9619		indx	21	C	T	T	-	-	-	C	C	C	T	C	-	-	-	-	A	A	G	C	T	T	-	A	-	G	G	C	T	T	C	G	T	G	G	G	G	G	-	-
ARC 15873::IRGC 43250-1::[IRIS 313-9634]	IRIS 313-9634	IRGC 125653	indx	1	C	ARC 15873::IRGC 43250-1::[IRIS 313-9634]	IRIS 313-9634	IRGC 125653	indx	27	C	T	T	-	-	-	C	C	C	T	C	-	-	-	-	A	A	G	C	T	T	-	A	-	G	G	C	T	T	C	G	T	G	G	G	G	T	T	T
BONG BOI::IRGC 32094-1::[IRIS 313-9637]	IRIS 313-9637	IRGC 125689	ind3	1	C	BONG BOI::IRGC 32094-1::[IRIS 313-9637]	IRIS 313-9637	IRGC 125689	ind3	22	C	T	T	-	-	-	C	C	C	T	C	-	-	-	-	A	A	G	C	T	T	-	A	-	G	G	C	T	T	C	G	T	G	G	G	G	G	-	-
TK RED 35-799::IRGC 38535-1::[IRIS 313-9682]	IRIS 313-9682	IRGC 135548	aro	1	C	TK RED 35-799::IRGC 38535-1::[IRIS 313-9682]	IRIS 313-9682	IRGC 135548	aro	24	C	T	T	-	-	-	C	C	C	T	C	-	-	-	-	A	A	G	C	T	T	-	A	-	G	G	C	T	T	C	G	T	G	G	G	G	T	T	T
MAKALIOKA::IRGC 376-1::[IRIS 313-9709]	IRIS 313-9709	IRGC 125832	ind2	1	C	MAKALIOKA::IRGC 376-1::[IRIS 313-9709]	IRIS 313-9709	IRGC 125832	ind2	17	C	T	T	-	-	-	C	C	C	T	C	-	-	-	-	A	A	G	C	T	T	-	A	-	G	G	C	T	T	C	G	T	G	G	G	G	G	-	-
BA SHI ZAO::IRGC 67903-1::[IRIS 313-9730]	IRIS 313-9730	IRGC 125675	ind1A	1	C	BA SHI ZAO::IRGC 67903-1::[IRIS 313-9730]	IRIS 313-9730	IRGC 125675	ind1A	28	C	T	T	-	-	-	C	C	C	T	C	-	-	-	-	A	A	G	C	T	T	-	A	-	G	G	C	T	T	C	G	T	G	G	G	G	T	T	T
GEANT W 7::IRGC 9620-1::[IRIS 313-9817]	IRIS 313-9817	IRGC 121342	ind2	1	C	GEANT W 7::IRGC 9620-1::[IRIS 313-9817]	IRIS 313-9817	IRGC 121342	ind2	18	C	T	T	-	-	-	C	C	C	T	C	-	-	-	-	C	-	G	C	T	T	-	A	-	G	G	C	T	T	C	G	T	G	G	G	G	G	-	-
PODIWEE::IRGC 11938-1::[IRIS 313-9831]	IRIS 313-9831	IRGC 125872	indx	1	C	PODIWEE::IRGC 11938-1::[IRIS 313-9831]	IRIS 313-9831	IRGC 125872	indx	28	C	T	T	-	-	-	C	C	C	T	C	-	-	-	-	A	A	G	C	T	T	-	A	-	G	G	C	T	T	C	G	T	G	G	G	G	T	T	-
O. SATIVA::IRGC 17083-1::[IRIS 313-9882]	IRIS 313-9882	IRGC 125863	indx	1	C	O. SATIVA::IRGC 17083-1::[IRIS 313-9882]	IRIS 313-9882	IRGC 125863	indx	14	C	T	T	-	-	-	C	C	C	T	C	-	-	-	-	A	A	G	C	T	T	-	A	-	G	G	C	T	T	C	G	T	G	G	G	G	G	-	-
IRI 339::IRGC 46956-1::[IRIS 313-9922]	IRIS 313-9922	IRGC 125778	ind1B	1	C	IRI 339::IRGC 46956-1::[IRIS 313-9922]	IRIS 313-9922	IRGC 125778	ind1B	29	C	T	T	-	-	-	C	C	C	T	C	-	-	-	-	A	A	G	C	T	T	-	A	-	G	G	C	T	T	C	G	T	G	G	G	G	T	T	T
TOURBE::IRGC 47066-1::[IRIS 313-9926]	IRIS 313-9926	IRGC 126162	indx	1	C	TOURBE::IRGC 47066-1::[IRIS 313-9926]	IRIS 313-9926	IRGC 126162	indx	29	C	T	T	-	-	-	C	C	C	T	C	-	-	-	-	A	A	G	C	T	T	-	A	-	G	G	C	T	T	C	G	T	G	G	G	G	T	T	T
SITHAIYAN KOTTAI SAMBA::IRGC 50155-1::[IRIS 313-9936]	IRIS 313-9936	IRGC 126143	ind2	1	C	SITHAIYAN KOTTAI SAMBA::IRGC 50155-1::[IRIS 313-9936]	IRIS 313-9936	IRGC 126143	ind2	18	C	T	T	-	-	-	C	C	C	T	C	-	-	-	-	A	A	G	C	T	T	-	A	-	G	G	C	T	T	C	G	T	G	G	G	G	T	T	T
SOLOMON RED RICE::IRGC 50950-1::[IRIS 313-9944]	IRIS 313-9944	IRGC 126312	indx	1	C	SOLOMON RED RICE::IRGC 50950-1::[IRIS 313-9944]	IRIS 313-9944	IRGC 126312	indx	37	C	T	T	-	-	-	C	C	C	T	C	-	-	-	-	A	A	G	C	T	T	-	A	-	G	G	C	T	T	C	G	T	G	G	G	G	T	T	T
ZHENFU 8::[B047]	B047	IRGC 136092	temp	0.5	A/C	ZHENFU 8::[B047]	B047	IRGC 136092	temp	9	C	T	T	-	-	-	C	C	C	T	C	-	-	-	-	A	A	G	C	T	T	-	A	-	G	G	C	T	T	C	G	T	G	G	G	G	G	-/T	-
QIYUEXIAN::[B082]	B082		indx	0.5	A/C	QIYUEXIAN::[B082]	B082		indx	21	C	T	T	-	-	-	C	C	C	T	C	-	-	-	-	A	A	G	C	T	T	-	A	-	G	G	C	T	T	C	G	T	G	G	G	G	G	-	-
FANHAOPI::[B221]	B221		ind1A	0.5	A/C	FANHAOPI::[B221]	B221		ind1A	24	C	T	T	-	-	-	C	C	C	T	C	-	-	-	-	A	A	G	C	T	T	-	A	-	G	G	C	T	T	C	G	T	G	G	G	G	G	-	-
BANJIEMANG2::[B230]	B230		japx	0	A	BANJIEMANG2::[B230]	B230		japx	19	C	T	T	-	-	-	C	C	C	T	C	-	-	-	-	A	A	G	C	T	T	-	A	-	G	G	C	T	T	C	G	T	G	G	G	G	G	-	-
CAU2::[CX354]	CX354	IRGC 135861	japx	0	A	CAU2::[CX354]	CX354	IRGC 135861	japx	20	C	T	T	-	-	-	C	C	C	T	C	-	-	-	-	A	A	G	C	T	T	-	A	-	G	G	C	T	T	C	G	T	G	G	G	G	G	-	-
KETAN MENAH::IRGC 48733-1::[IRIS 313-10152]	IRIS 313-10152	IRGC 125798	trop	0	A	KETAN MENAH::IRGC 48733-1::[IRIS 313-10152]	IRIS 313-10152	IRGC 125798	trop	16	C	T	T	-	-	-	C	C	C	T	C	-	-	-	-	A	A	G	C	T	T	-	A	-	G	G	C	T	T	C	G	T	G	G	G	G	G	-	-
NOK KOD::IRGC 11784-1::[IRIS 313-10656]	IRIS 313-10656	IRGC 128407	subtrop	0	A	NOK KOD::IRGC 11784-1::[IRIS 313-10656]	IRIS 313-10656	IRGC 128407	subtrop	18	C	T	T	-	-	-	C	C	C	T	C	-	-	-	-	C	-	G	C	T	T	-	A	-	G	G	C	T	T	C	G	T	G	G	G	G	G	-	-
HALSUDU HEENATI::IRGC 15599-1::[IRIS 313-10721]	IRIS 313-10721	IRGC 127401	ind2	0	A	HALSUDU HEENATI::IRGC 15599-1::[IRIS 313-10721]	IRIS 313-10721	IRGC 127401	ind2	14	C	T	T	-	-	-	C	C	C	T	C	-	-	-	-	C	-	G	C	T	T	-	A	-	G	G	C	T	T	C	G	T	G	G	G	G	G	-	-
GAJA BARU::IRGC 17586-1::[IRIS 313-10769]	IRIS 313-10769	IRGC 127375	indx	0		GAJA BARU::IRGC 17586-1::[IRIS 313-10769]	IRIS 313-10769	IRGC 127375	indx	22	C	T	T	-	-	-	C	C	C	T	C	-	-	-	-	A	A	G	C	T	T	-	A	-	G	G	C	T	T	C	G	T	G	G	G	G	T	T	T
KWATIK PUTIH::IRGC 18053-1::[IRIS 313-10787]	IRIS 313-10787		ind3	0.5	A/C	KWATIK PUTIH::IRGC 18053-1::[IRIS 313-10787]	IRIS 313-10787		ind3	19	C	T	T	-	-	-	C	C	C	T	C	-	-	-	-	A	A	G	C	T	T	-	A	-	G	G	C	T	T	C	G	T	G	G	G	G	G	-	-
ARC 11538::IRGC 21463-1::[IRIS 313-10867]	IRIS 313-10867	IRGC 128222	subtrop	0	A	ARC 11538::IRGC 21463-1::[IRIS 313-10867]	IRIS 313-10867	IRGC 128222	subtrop	14	C	T	T	-	-	-	C	C	C	T	C	-	-	-	-	C	-	G	C	T	T	-	A	-	G	G	C	T	T	C	G	T	G	G	G	G	G	-	-
ARC 11822::IRGC 21677-1::[IRIS 313-10873]	IRIS 313-10873	IRGC 127140	aus	0	A	ARC 11822::IRGC 21677-1::[IRIS 313-10873]	IRIS 313-10873	IRGC 127140	aus	16	C	T	T	-	-	-	C	C	C	T	C	-	-	-	-	C	-	G	C	T	T	-	A	-	G	G	C	T	T	C	G	T	G	G	G	G	G	-	-
ARC 12413::IRGC 22044-1::[IRIS 313-10881]	IRIS 313-10881	IRGC 128223	admix	0	A	ARC 12413::IRGC 22044-1::[IRIS 313-10881]	IRIS 313-10881	IRGC 128223	admix	18	C	T	T	-	-	-	C	C	C	T	C	-	-	-	-	A	A	G	C	T	T	-	A	-	G	G	C	T	T	C	G	T	G	G	G	G	G	-	-
ARC 12726::IRGC 22288-2::[IRIS 313-10888]	IRIS 313-10888	IRGC 127943	subtrop	0	A	ARC 12726::IRGC 22288-2::[IRIS 313-10888]	IRIS 313-10888	IRGC 127943	subtrop	18	C	T	T	-	-	-	C	C	C	T	C	-	-	-	-	C	-	G	C	T	T	-	A	-	G	G	C	T	T	C	G	T	G	G	G	G	G	-	-
ARC 12867::IRGC 22401-1::[IRIS 313-10891]	IRIS 313-10891	IRGC 127148	aus	0	A	ARC 12867::IRGC 22401-1::[IRIS 313-10891]	IRIS 313-10891	IRGC 127148	aus	25	C	T	T	-	-	-	C	C	C	T	C	-	-	-	-	A	A	G	C	T	T	-	A	-	G	G	C	T	T	C	G	T	G	G	G	G	G	-	-
ARC 12920::IRGC 22450-1::[IRIS 313-10892]	IRIS 313-10892	IRGC 127149	aus	0	A	ARC 12920::IRGC 22450-1::[IRIS 313-10892]	IRIS 313-10892	IRGC 127149	aus	25	C	T	T	-	-	-	C	C	C	T	C	-	-	-	-	A	A	G	C	T	T	-	A	-	G	G	C	T	T	C	G	T	G	G	G	G	G	-	-
VELLAIKOTTAI::IRGC 28618-1::[IRIS 313-11042]	IRIS 313-11042		indx	0	A	VELLAIKOTTAI::IRGC 28618-1::[IRIS 313-11042]	IRIS 313-11042		indx	22	C	T	T	-	-	-	C	C	C	T	C	-	-	-	-	A	A	G	C	T	T	-	A	-	G	G	C	T	T	C	G	T	G	G	G	G	T	T	-
KHAO NAM YEN::IRGC 29546-2::[IRIS 313-11075]	IRIS 313-11075	IRGC 128084	japx	0	A	KHAO NAM YEN::IRGC 29546-2::[IRIS 313-11075]	IRIS 313-11075	IRGC 128084	japx	19	C	T	T	-	-	-	C	C	C	T	C	-	-	-	-	A	A	G	C	T	T	-	A	-	G	G	C	T	T	C	G	T	G	G	G	G	G	-	-
KALA MUNA::IRGC 31832-2::[IRIS 313-11115]	IRIS 313-11115	IRGC 128066	ind2	0.5	A/C	KALA MUNA::IRGC 31832-2::[IRIS 313-11115]	IRIS 313-11115	IRGC 128066	ind2	12	C	T	T	-	-	-	C	C	C	T	C	-	-	-	-	C	-	G	C	T	T	-	A	-	G	G	C	T	T	C	G	T	G	G	G	G	G	-	-
GURULEY::IRGC 32441-1::[IRIS 313-11120]	IRIS 313-11120	IRGC 127396	ind2	0		GURULEY::IRGC 32441-1::[IRIS 313-11120]	IRIS 313-11120	IRGC 127396	ind2	16	C	T	T	-	-	-	C	C	C	T	C	-	-	-	-	A	A	G	C	T	T	-	A	-	G	G	C	T	T	C	G	T	G	G	G	G	T	T	T
KHAW KAR 13::IRGC 36711-1::[IRIS 313-11195]	IRIS 313-11195	IRGC 128344	subtrop	0	A	KHAW KAR 13::IRGC 36711-1::[IRIS 313-11195]	IRIS 313-11195	IRGC 128344	subtrop	15	C	T	T	-	-	-	C	C	C	T	C	-	-	-	-	A	A	G	C	T	T	-	A	-	G	G	C	T	T	C	G	T	G	G	G	G	G	-	-
ARC 13888::IRGC 41288-2::[IRIS 313-11262]	IRIS 313-11262	IRGC 127952	indx	0.5	A/C	ARC 13888::IRGC 41288-2::[IRIS 313-11262]	IRIS 313-11262	IRGC 127952	indx	29	C	T	T	-	-	-	C	C	C	T	C	-	-	-	-	A	A	G	C	T	T	-	A	-	G	G	C	T	T	C	G	T	G	G	G	G	T	T	T
ARC 13460::IRGC 42732-2::[IRIS 313-11297]	IRIS 313-11297	IRGC 127947	admix	0	A	ARC 13460::IRGC 42732-2::[IRIS 313-11297]	IRIS 313-11297	IRGC 127947	admix	24	C	T	T	-	-	-	C	C	C	T	C	-	-	-	-	A	A	G	C	T	T	-	A	-	G	G	C	T	T	C	G	T	G	G	G	G	G	-	-
ARC 14299::IRGC 42889-2::[IRIS 313-11299]	IRIS 313-11299	IRGC 127954	indx	0	A	ARC 14299::IRGC 42889-2::[IRIS 313-11299]	IRIS 313-11299	IRGC 127954	indx	18	C	T	T	-	-	-	C	C	C	T	C	-	-	-	-	C	-	G	C	T	T	-	A	-	G	G	C	T	T	C	G	T	G	G	G	G	T	T	T
PADI BURIH::IRGC 44081-1::[IRIS 313-11328]	IRIS 313-11328	IRGC 127699	trop	0	A	PADI BURIH::IRGC 44081-1::[IRIS 313-11328]	IRIS 313-11328	IRGC 127699	trop	13	C	T	T	-	-	-	C	C	C	T	C	-	-	-	-	A	A	G	C	T	T	-	A	-	G	G	C	T	T	C	G	T	G	G	G	G	G	-	-
VAIKATHARYAN::IRGC 52805-1::[IRIS 313-11461]	IRIS 313-11461	IRGC 127881	ind2	0	A	VAIKATHARYAN::IRGC 52805-1::[IRIS 313-11461]	IRIS 313-11461	IRGC 127881	ind2	28	C	T	T	-	-	-	C	C	C	T	C	-	-	-	-	A	A	G	C	T	T	-	A	-	G	G	C	T	T	C	G	T	G	G	G	G	T	T	T
IC 25690::IRGC 53973-1::[IRIS 313-11494]	IRIS 313-11494	IRGC 128317	subtrop	0	A	IC 25690::IRGC 53973-1::[IRIS 313-11494]	IRIS 313-11494	IRGC 128317	subtrop	19	C	T	T	-	-	-	C	C	C	T	C	-	-	-	-	A	A	G	C	T	T	-	A	-	G	G	C	T	T	C	G	T	G	G	G	G	G	-	-
BIJULI BATI::IRGC 58917-1::[IRIS 313-11563]	IRIS 313-11563	IRGC 127227	ind2	0	A	BIJULI BATI::IRGC 58917-1::[IRIS 313-11563]	IRIS 313-11563	IRGC 127227	ind2	18	C	T	T	-	-	-	C	C	C	T	C	-	-	-	-	A	A	G	C	T	T	-	A	-	G	G	C	T	T	C	G	T	G	G	G	G	G	-	-
KAO SONG HAI::IRGC 61827-1::[IRIS 313-11623]	IRIS 313-11623	IRGC 128332	subtrop	0	A	KAO SONG HAI::IRGC 61827-1::[IRIS 313-11623]	IRIS 313-11623	IRGC 128332	subtrop	19	C	T	T	-	-	-	C	C	C	T	C	-	-	-	-	A	A	G	C	T	T	-	A	-	G	G	C	T	T	C	G	T	G	G	G	G	G	-	-
AE WAWNG POO DOO::IRGC 71007-1::[IRIS 313-11832]	IRIS 313-11832	IRGC 131964	subtrop	0	A	AE WAWNG POO DOO::IRGC 71007-1::[IRIS 313-11832]	IRIS 313-11832	IRGC 131964	subtrop	17	C	T	T	-	-	-	C	C	C	T	C	-	-	-	-	A	A	G	C	T	T	-	A	-	G	G	C	T	T	C	G	T	G	G	G	G	G	-	-
BUENG MONG LENG WE::IRGC 71088-1::[IRIS 313-11834]	IRIS 313-11834	IRGC 128246	subtrop	0	A	BUENG MONG LENG WE::IRGC 71088-1::[IRIS 313-11834]	IRIS 313-11834	IRGC 128246	subtrop	22	C	T	T	-	-	-	C	C	C	T	C	-	-	-	-	C	-	G	C	T	T	-	A	-	G	G	C	T	T	C	G	T	G	G	G	G	G	-	-
HO MOK::IRGC 73171-1::[IRIS 313-11892]	IRIS 313-11892	IRGC 135754	subtrop	0	A	HO MOK::IRGC 73171-1::[IRIS 313-11892]	IRIS 313-11892	IRGC 135754	subtrop	19	C	T	T	-	-	-	C	C	C	T	C	-	-	-	-	A	A	G	C	T	T	-	A	-	G	G	C	T	T	C	G	T	G	G	G	G	G	-	-
PHIT CHZK::IRGC 73317-1::[IRIS 313-11897]	IRIS 313-11897	IRGC 128431	subtrop	0	A	PHIT CHZK::IRGC 73317-1::[IRIS 313-11897]	IRIS 313-11897	IRGC 128431	subtrop	19	C	T	T	-	-	-	C	C	C	T	C	-	-	-	-	A	A	G	C	T	T	-	A	-	G	G	C	T	T	C	G	T	G		G	G	G	-	-
ZAO LENG SHUI ZHAN::IRGC 79756-1::[IRIS 313-12012]	IRIS 313-12012	IRGC 127910	ind1A	0.5	A/C	ZAO LENG SHUI ZHAN::IRGC 79756-1::[IRIS 313-12012]	IRIS 313-12012	IRGC 127910	ind1A	24	C	T	T	-	-	-	C	C	C	T	C	-	-	-	-	C	-	G	C	T	T	-	A	-	G	G	C	T	T	C	G	T	G	G	G	G	G	-	-
CHAO MEO::IRGC 80273-1::[IRIS 313-12029]	IRIS 313-12029	IRGC 132278	subtrop	0	A	CHAO MEO::IRGC 80273-1::[IRIS 313-12029]	IRIS 313-12029	IRGC 132278	subtrop	23	C	T	T	-	-	-	C	C	C	T	C	-	-	-	-	A	A	G	C	T	T	-	A	-	G	G	C	T	T	C	G	T	G	G	G	G	G	-	-
PULUT KETAN::IRGC 82674-2::[IRIS 313-12068]	IRIS 313-12068	IRGC 132262	trop	0	A	PULUT KETAN::IRGC 82674-2::[IRIS 313-12068]	IRIS 313-12068	IRGC 132262	trop	15	C	T	T	-	-	-	C	C	C	T	C	-	-	-	-	A	A	G	C	T	T	-	A	-	G	G	C	T	T	C	G	T	G	G	G	G	G	-	-
SET::IRGC 92200-1::[IRIS 313-12227]	IRIS 313-12227	IRGC 127795	subtrop	0	A	SET::IRGC 92200-1::[IRIS 313-12227]	IRIS 313-12227	IRGC 127795	subtrop	16	C	T	T	-	-	-	C	C	C	T	C	-	-	-	-	C	-	G	C	T	T	-	A	-	G	G	C	T	T	C	G	T	G	G	G	G	G	-	-
KON SIM::IRGC 95626-1::[IRIS 313-12265]	IRIS 313-12265	IRGC 128352	subtrop	0	A	KON SIM::IRGC 95626-1::[IRIS 313-12265]	IRIS 313-12265	IRGC 128352	subtrop	20	C	T	T	-	-	-	C	C	C	T	C	-	-	-	-	A	A	G	C	T	T	-	A	-	G	G	C	T	T	C	G	T	G	G	G	G	G	-	-
PADI MIAT (KECIL)::IRGC 97366-1::[IRIS 313-12285]	IRIS 313-12285	IRGC 135576	trop	0	A	PADI MIAT (KECIL)::IRGC 97366-1::[IRIS 313-12285]	IRIS 313-12285	IRGC 135576	trop	18	C	T	T	-	-	-	C	-	-	-	C	-	-	-	-	A	A	G	C	T	T	-	A	-	G	G	C	T	T	C	G	T	G	G	G	G	G	-	-
DO LEUANG::IRGC 106990-1::[IRIS 313-12336]	IRIS 313-12336	IRGC 128282	subtrop	0	A	DO LEUANG::IRGC 106990-1::[IRIS 313-12336]	IRIS 313-12336	IRGC 128282	subtrop	14	C	T	T	-	-	-	C	C	C	T	C	-	-	-	-	C	-	G	C	T	T	-	A	-	G	G	C	T	T	C	G	T	G	G	G	G	G	-	-
KHAO::IRGC 107359-1::[IRIS 313-12344]	IRIS 313-12344		subtrop	0	A	KHAO::IRGC 107359-1::[IRIS 313-12344]	IRIS 313-12344		subtrop	8	C	T	T	-	-	-	C	C	C	T	C	-	-	-	-	C	-	G	C	T	T	-	A	-	G	G	C	T	T	C	G	T	G	G	G	G	G	-	-
LAI DAM::IRGC 107490-1::[IRIS 313-12347]	IRIS 313-12347	IRGC 127541	subtrop	0	A	LAI DAM::IRGC 107490-1::[IRIS 313-12347]	IRIS 313-12347	IRGC 127541	subtrop	8	C	T	T	-	-	-	C	C	C	T	C	-	-	-	-	A	A	G	C	T	T	-	A	-	G	G	C	T	T	C	G	T	G	G	G	G	G	-	-
CHA LOY OE::C1::[IRIS 313-7856]	IRIS 313-7856	IRGC 122004	subtrop	0	A	CHA LOY OE::C1::[IRIS 313-7856]	IRIS 313-7856	IRGC 122004	subtrop	11	C	T	T	-	-	-	C	C	C	T	C	-	-	-	-	C	-				T	-	A	-	G	G	C	T	T	C	G	T	G	G	G	G	G	-	-
CIRAD 358::C1::[IRIS 313-7859]	IRIS 313-7859	IRGC 135521	subtrop	0	A	CIRAD 358::C1::[IRIS 313-7859]	IRIS 313-7859	IRGC 135521	subtrop	18	C	T	T	-	-	-	C	C	C	T	C	-	-	-	-	A	A	G	C	T	T	-	A	-	G	G	C	T	T	C	G	T	G	G	G	G	G	-	-
KAMJA::IRGC 62171-1::[IRIS 313-8302]	IRIS 313-8302	IRGC 126116	admix	0	A	KAMJA::IRGC 62171-1::[IRIS 313-8302]	IRIS 313-8302	IRGC 126116	admix	19	C	T	T	-	-	-	C	C	C	T	C	-	-	-	-	A	A	G	C	T	T	-	A	-	G	G	C	T	T	C	G	T	G	G	G	G	G	-	-
LEONG ORN 4135::IRGC 14087-1::[IRIS 313-8468]	IRIS 313-8468	IRGC 126233	ind3	0.5	A/C	LEONG ORN 4135::IRGC 14087-1::[IRIS 313-8468]	IRIS 313-8468	IRGC 126233	ind3	13	C	T	T	-	-	-	C	C	C	T	C	-	-	-	-	C	-	G	C	T	T	-	A	-	G	G	C	T	T	C	G	T	G	G	G	G	G	-	-
DAM::IRGC 23710-1::[IRIS 313-8580]	IRIS 313-8580	IRGC 126197	subtrop	0	A	DAM::IRGC 23710-1::[IRIS 313-8580]	IRIS 313-8580	IRGC 126197	subtrop	18	C	T	T	-	-	-	C	C	C	T	C	-	-	-	-	A	A	G	C	T	T	-	A	-	G	G	C	T	T	C	G	T	G	G	G	G	G	-	-
BANJANG::IRGC 44069-1::[IRIS 313-8626]	IRIS 313-8626	IRGC 126045	trop	0	A	BANJANG::IRGC 44069-1::[IRIS 313-8626]	IRIS 313-8626	IRGC 126045	trop	19	C	T	T	-	-	-	C	C	C	T	C	-	-	-	-	A	A	G	C	T	T	-	A	-	G	G	C	T	T	C	G	T	G	G	G	G	G	-	-
KOTTEYARAN::IRGC 47383-1::[IRIS 313-8660]	IRIS 313-8660	IRGC 125616	ind2	0	A	KOTTEYARAN::IRGC 47383-1::[IRIS 313-8660]	IRIS 313-8660	IRGC 125616	ind2	23	C	T	T	-	-	-	C	C	C	T	C	-	-	-	-	A	A	G	C	T	T	-	A	-	G	G	C	T	T	C	G	T	G	G	G	G	T	T	T
E WAWNG::IRGC 71140-1::[IRIS 313-8884]	IRIS 313-8884	IRGC 126134	subtrop	0	A	E WAWNG::IRGC 71140-1::[IRIS 313-8884]	IRIS 313-8884	IRGC 126134	subtrop	10	C	T	T	-	-	-	C	C	C	T	C	-	-	-	-	A	A	G	C	T	T	-	A	-	G	G	C	T	T	C	G	T	G	G	G	G	G	-	-
LASAT PUTIH::IRGC 44076-1::[IRIS 313-8955]	IRIS 313-8955	IRGC 126231	trop	0	A	LASAT PUTIH::IRGC 44076-1::[IRIS 313-8955]	IRIS 313-8955	IRGC 126231	trop	14	C	T	T	-	-	-	C	C	C	T	C	-	-	-	-	A	A	G	C	T	T	-	A	-	G	G	C	T	T	C	G	T	G	G	G	G	G	-	-
KALU ILANKALAYAN::IRGC 36270-1::[IRIS 313-8968]	IRIS 313-8968	IRGC 125792	ind2	0	A	KALU ILANKALAYAN::IRGC 36270-1::[IRIS 313-8968]	IRIS 313-8968	IRGC 125792	ind2	14	C	T	T	-	-	-	C	C	C	T	C	-	-	-	-	A	A	G	C	T	T	-	A	-	G	G	C	T	T	C	G	T	G	G	G	G	G	-	-
ARC 12536::IRGC 41068-1::[IRIS 313-9053]	IRIS 313-9053	IRGC 125644	admix	0	A	ARC 12536::IRGC 41068-1::[IRIS 313-9053]	IRIS 313-9053	IRGC 125644	admix	13	C	T	T	-	-	-	C	C	C	T	C	-	-	-	-	C	-	G	C	T	T	-	A	-	G	G	C	T	T	C	G	T	G	G	G	G	G	-	-
PARA NELLU::IRGC 50009-1::[IRIS 313-9351]	IRIS 313-9351	IRGC 125868	ind2	0	A	PARA NELLU::IRGC 50009-1::[IRIS 313-9351]	IRIS 313-9351	IRGC 125868	ind2	26	C	T	T	-	-	-	C	C	C	T	C	-	-	-	-	C	-	G	C	T	T	-	A	-	G	G	C	T	T	C	G	T	G	G	G	G	T	T	T
MOCHICA::IRGC 11070-1::[IRIS 313-9825]	IRIS 313-9825	IRGC 126159	ind2	0.5	A/C	MOCHICA::IRGC 11070-1::[IRIS 313-9825]	IRIS 313-9825	IRGC 126159	ind2	16	C	T	T	-	-	-	C	C	C	T	C	-	-	-	-	A	A	G	C	T	T	-	A	-	G	G	C	T	T	C	G	T	G	G	G	G	G	-	-
MODDAI KARUPPAN::IRGC 15465-1::[IRIS 313-9862]	IRIS 313-9862	IRGC 126139	ind2	0	A	MODDAI KARUPPAN::IRGC 15465-1::[IRIS 313-9862]	IRIS 313-9862	IRGC 126139	ind2	12	C	T	T	-	-	-	C	C	C	T	C	-	-	-	-	A	A	G	C	T	T	-	A	-	G	G	C	T	T	C	G	T	G	G	G	G	T	T	-
IR68552-55-3-2::[CX42]	CX42	IRGC 135933	indx	1	C	IR68552-55-3-2::[CX42]	CX42	IRGC 135933	indx	16	C	T	T	-	-	-	C	C	C	T	C	-	-	-	-	A	A	G	C	T	T	-	A	-	G	G	C	T	T	C	G	T	G	G	G	G	G	-	-
LEUANG AWN::IRGC 48257-1::[IRIS 313-8785]	IRIS 313-8785		ind3	1	C	LEUANG AWN::IRGC 48257-1::[IRIS 313-8785]	IRIS 313-8785		ind3	18	C	T	T	-	-	-	C	C	C	T	C	-	-	-	-	A	A	G	C	T	T	-	A	-	G	G	C	T	T	C	G	T	G	G	G	G	T	T	T
KATUNG::IRGC 71536-1::[IRIS 313-8811]	IRIS 313-8811	IRGC 131940	ind3	1	C	KATUNG::IRGC 71536-1::[IRIS 313-8811]	IRIS 313-8811	IRGC 131940	ind3	16	C	T	T	-	-	-	C	C	C	T	C	-	-	-	-	C	-	G	C	T	T	-	A	-	G	G	C	T	T	C	G	T	G	G	G	G	G	-	-
K 1074::IRGC 55017-1::[IRIS 313-11505]	IRIS 313-11505	IRGC 127469	ind2	1	C	K 1074::IRGC 55017-1::[IRIS 313-11505]	IRIS 313-11505	IRGC 127469	ind2	20	C	T	T	-	-	-	C	C	C	T	C	-	-	-	-	A	A	G	C	T	T	-	A	-	G	G	C	T	T	C	G	T	G	G	G	G	T	T	T
YEBAWYIN::IRGC 33885-1::[IRIS 313-8697]	IRIS 313-8697	IRGC 125628	ind3	1	C	YEBAWYIN::IRGC 33885-1::[IRIS 313-8697]	IRIS 313-8697	IRGC 125628	ind3	18	C	T	T	-	-	-	C	C	C	T	C	-	-	-	-	A	A	G	C	T	T	-	A	-	G	G	C	T	T	C	G	T	G	G	G	G	G	-	-
ARC 12690::IRGC 22257-1::[IRIS 313-10887]	IRIS 313-10887	IRGC 127147	indx	1	C	ARC 12690::IRGC 22257-1::[IRIS 313-10887]	IRIS 313-10887	IRGC 127147	indx	24	C	T	T	-	-	-	C	C	C	T	C	-	-	-	-	C	-	G	C	T	T	-	A	-	G	G	C	T	T	C	G	T	G	G	G	G
ARC 15063::IRGC 41909-2::[IRIS 313-11276]	IRIS 313-11276	IRGC 132319	indx	1	C	ARC 15063::IRGC 41909-2::[IRIS 313-11276]	IRIS 313-11276	IRGC 132319	indx	18	C	T	T	-	-	-	C	C	C	T	C	-	-	-	-	A	A	G	C	T	T	-	A	-	G	G	C	T	T	C				G			G	-/T	-/T
SESAT JADI::IRGC 71834-1::[IRIS 313-11850]	IRIS 313-11850	IRGC 132041	ind3	1	C	SESAT JADI::IRGC 71834-1::[IRIS 313-11850]	IRIS 313-11850	IRGC 132041	ind3	24	C	T	T	-	-	-	C	C	C	T	C	-	-	-	-	A	A	G	C	T	T	-	A	-	G	G	C	T	T	C	G	T	G	G	G	G	G	-	-
PUILLIPINA KATARI::IRGC 77293-1::[IRIS 313-8509]	IRIS 313-8509	IRGC 126261	ind2	1	C	PUILLIPINA KATARI::IRGC 77293-1::[IRIS 313-8509]	IRIS 313-8509	IRGC 126261	ind2	18	C	T	T	-	-	-	C	C	C	T	C	-	-	-	-	C	-	G	C	T	T	-	A	-	G	G	C	T	T	C	G	T	G	G	G	G	T	T	-
ZHONGNONG 4::[B087]	B087		ind2	1	C	ZHONGNONG 4::[B087]	B087		ind2	9	C	T	T	-	-	-	C	C	C	T	C	-	-	-	-	C	-	G	C	T	T	-	A	-	G	G	C	T	T	C	G	T	G	G	G	G	G	-	-
HUANGSIZHAN::[CX393]	CX393		ind1B	1	C	HUANGSIZHAN::[CX393]	CX393		ind1B	14	C	T	T	-	-	-	C	C	C	T	C	-	-	-	-	A	A	G	C	T	T	-	A	-	G	G	C	T	T	C	G	T	G	G	G	G	T	T	T
COLOMBIA 1::IRGC 116970-1::[IRIS 313-10272]	IRIS 313-10272	IRGC 125714	japx	1	C	COLOMBIA 1::IRGC 116970-1::[IRIS 313-10272]	IRIS 313-10272	IRGC 125714	japx	12	C	T	T	-	-	-	C	C	C	T	C	-	-	-	-	A	A	G	C	T	T	-			G	G	C	T	T	C	G	T	G	G	G	G	G	-	-
SING SAI::IRGC 71442-2::[IRIS 313-11845]	IRIS 313-11845	IRGC 132369	subtrop	0	A	SING SAI::IRGC 71442-2::[IRIS 313-11845]	IRIS 313-11845	IRGC 132369	subtrop	6	C	T	T	-	-	-	C	C	C	T	C	-	-	-	-	C	-	G	C	T	T	-	A	-	G	G	C	T	T	C	G	T	G	G	G	G	G	-	-
LINYITANGDAO::[CX54]	CX54		indx	1	C	LINYITANGDAO::[CX54]	CX54		indx	11	C	T	T	-	-	-	C	C	C	T	C	-	-	-	-	C	-/A	G	C	T	T	-/A	A	-/A	G	G	C	T	T	C	G	T	G	G	G	G	T	A/T	T
LEUANG DAM::IRGC 78267-1::[IRIS 313-8895]	IRIS 313-8895	IRGC 126156	ind3	1	C	LEUANG DAM::IRGC 78267-1::[IRIS 313-8895]	IRIS 313-8895	IRGC 126156	ind3	6	C	T	T	-	-	-	C	C	C	T	C	-	-	-	-	C	-	G	C	T	T	-	A	-	G	G	C	T	T	C	G	T	G	G	G	G	G	-	-
KEDOT::IRGC 66568-1::[IRIS 313-8291]	IRIS 313-8291		ind3	1	C	KEDOT::IRGC 66568-1::[IRIS 313-8291]	IRIS 313-8291		ind3	20	C	T	T	-	-	-	C	C	C	T	C	-	-	-	-	A	A	G	C	T	T	-	A	-	G	G	C	T	T	C	G	T	G	G	G	G	T	T	T
PINILING DANIEL::IRGC 38828-2::[IRIS 313-11235]	IRIS 313-11235	IRGC 128137	indx	1	C	PINILING DANIEL::IRGC 38828-2::[IRIS 313-11235]	IRIS 313-11235	IRGC 128137	indx	29	C	T	T	-	-	-	C	C	C	T	C	-	-	-	-	A	A	G	C	T	T	-	A	-	G	G	C	T	T	C	G	T	G	G	G	G	T	T	T
MUOY KUM::IRGC 81314-1::[IRIS 313-12038]	IRIS 313-12038	IRGC 135571	ind3	1	C	MUOY KUM::IRGC 81314-1::[IRIS 313-12038]	IRIS 313-12038	IRGC 135571	ind3	23	C	T	T	-	-	-	C	C	C	T	C	-	-	-	-	A	A	G	C	T	T	-	A	-	G	G	C	T	T	C	G	T	G	G	G	G	T	T	T
CHAWAL::IRGC 73090-1::[IRIS 313-9601]	IRIS 313-9601	IRGC 121606	aro	1	C	CHAWAL::IRGC 73090-1::[IRIS 313-9601]	IRIS 313-9601	IRGC 121606	aro	26	C	T	T	-	-	-	C	C	C	T	C	-	-	-	-	C	-	G	C	T	T	-	A	-	G	G	C	T	T	C	G	T	G	G	G	G	G	-	-
SIMET 2::IRGC 25734-1::[IRIS 313-8833]	IRIS 313-8833	IRGC 126142	ind3	1	C	SIMET 2::IRGC 25734-1::[IRIS 313-8833]	IRIS 313-8833	IRGC 126142	ind3	17	C	T	T	-	-	-	C	C	C	T	C	-	-	-	-	C	-	G	C	T	T	-	A	-	G	G	C	T	T	C	G	T	G	G	G	G	T	T	T
XIAOBAIMI::[B132]	B132		indx	0.5	A/C	XIAOBAIMI::[B132]	B132		indx	10	C	T	T	-	-	-	C	C	C	T	C	-	-	-	-	C	-	G	C	T	T	-	A	-	G	G	C	T	T	C	G	T	G	G	G	G	G	-	-
ZHONG 413::[CX19]	CX19		indx	1	C	ZHONG 413::[CX19]	CX19		indx	15	C	T	T	-	-	-	C	C	C	T	C	-	-	-	-	A	A	G	C	T	T	-	A	-	G	G	C	T	T	C	G	T	G	G	G	G	T	T	T
BAIKEHANHE::[B147]	B147		ind1A	1	C	BAIKEHANHE::[B147]	B147		ind1A	20	C	T	T	-	-	-	C	C	C	T	C	-	-	-	-	A	A	G	C	T	T	-	A	-	G	G	C	T	T	C	G	T	G	G	G	G	G	-	-
CODE NO 31323::IRGC 46907-1::[IRIS 313-9190]	IRIS 313-9190	IRGC 126148	indx	0.5	A/C	CODE NO 31323::IRGC 46907-1::[IRIS 313-9190]	IRIS 313-9190	IRGC 126148	indx	28	C	T	T	-	-	-	C	C	C	T	C	-	-	-	-	A	A	G	C	T	T	-	A	-	G	G	C	T		C	G	T	G	G	G		G	-	-
ARC 6579::IRGC 42510-1::[IRIS 313-11290]	IRIS 313-11290	IRGC 127165	admix	0.5	A/C	ARC 6579::IRGC 42510-1::[IRIS 313-11290]	IRIS 313-11290	IRGC 127165	admix	32.5	C	T	T	-	-	-	C	C	C	T	C	-	-	-	-	A	A	G	C	T	T	-	A	-	G	G	C	T		C	G	T	G	G	G	G	T	T	T
HR 22::IRGC 6394-1::[IRIS 313-10531]	IRIS 313-10531	IRGC 128310	admix	0		HR 22::IRGC 6394-1::[IRIS 313-10531]	IRIS 313-10531	IRGC 128310	admix	32	C	T	T	-	-	-	C	C	C	T	C	-	-	-	-	C	-	G	C	T	T	-	A	-	G	G	C	T	T	C	G	T	G	G			G	-	-
IR 13429-109-2-2-1::IRGC 63491-1::[IRIS 313-10167]	IRIS 313-10167	IRGC 125773	indx	1	C	IR 13429-109-2-2-1::IRGC 63491-1::[IRIS 313-10167]	IRIS 313-10167	IRGC 125773	indx	20	C	T	T	-	-	-	C	C	C	T	C	-	-	-	-	A	A	G	C	T	T	-	A	-	G	G	C	T	T	C	G	T	G	G	G	G	T	T	T
DUD KUNING::IRGC 44-1::[IRIS 313-9533]	IRIS 313-9533	IRGC 125729	ind3	1	C	DUD KUNING::IRGC 44-1::[IRIS 313-9533]	IRIS 313-9533	IRGC 125729	ind3	20	C	T	T	-	-	-	C	C	C	T	C	-	-	-	-	C	-	G	C	T	T	-	A	-	G	G	C	T	T	C	G	T	G	G	G	G	G	-	-
QINGSIAI 16B::[B153]	B153		indx	0.5	A/C	QINGSIAI 16B::[B153]	B153		indx	19	C	T	T	-	-	-	C	C	C	T	C	-	-	-	-	C	-	G	C	T	T	-	A	-	G	G	C	T	T	C	G	T	G	G	G	G	G	-/T	-/T
CADUNG SO BLOC 1::IRGC 30231-1::[IRIS 313-11096]	IRIS 313-11096	IRGC 135743	ind3	0	A	CADUNG SO BLOC 1::IRGC 30231-1::[IRIS 313-11096]	IRIS 313-11096	IRGC 135743	ind3	52	C	T	T	-	-	-	C	C	C	T	C	-	-	-	-	C	-	G	C	T	T	-	A	-	G	G	C	T	T	C	G	T	G	G	G	G	G	-	-
ARC 11663::IRGC 42695-1::[IRIS 313-8621]	IRIS 313-8621	IRGC 126174	ind1B	1	C	ARC 11663::IRGC 42695-1::[IRIS 313-8621]	IRIS 313-8621	IRGC 126174	ind1B	71	C	T	T	-	-	-	C	C	C	T	C	-	-	-	-	A	A	G	C	T	T	-	A	-	G	G	C	T	C	C	A	C	A	G			G	-	-
BULEIDA A-75::[B019]	B019	IRGC 135852	indx	0	A	BULEIDA A-75::[B019]	B019	IRGC 135852	indx	89	C	T	C	C	C	C	C	C	C	T	C	-	-	-	-	A	A	G	C	T			A	-	G	G	C	T	C	C	A	C	A	G	A	A	G	-	-
C 894-21::[B027]	B027	IRGC 135858	ind3	0	A	C 894-21::[B027]	B027	IRGC 135858	ind3	86	C	T	T	-	-	-	C	C	C	T	C	-	-	-	-	A	A	G	C	T	T	-	A	-	G	G	C	T	C	C	G/A	T/C	G/A	G	A	A	G	-	-
ROHINI::[B032]	B032	IRGC 136034	ind1B	0	A	ROHINI::[B032]	B032	IRGC 136034	ind1B	115.5	C	T	T	-	-	-	C	C	C	T	C	-	-	-	-	C	-	G	C	T	T	-	C	C	G	G	C	T	C	C	A	C	A	G	A	A	G	-	-
CISOKAN::[B048]	B048	IRGC 135868	ind1B	0	A	CISOKAN::[B048]	B048	IRGC 135868	ind1B	60.5	C	T	C	C	C	C	C	C	C	T	C	-	-	-	-	A	A	G	C	T	T	-	A	-	G	G	C	T		C							G	-	-
BAOXUAN 21 A::[B105]	B105		indx	0	A	BAOXUAN 21 A::[B105]	B105		indx	89	C	T	T	-	-	-	C	C	C	T	C	-	-	-	-	A	A	G	C	T	T	-	A	-	G	G	C	T									G	-	-
SHUFENG 101::[B116]	B116		indx	0	A	SHUFENG 101::[B116]	B116		indx	95	C	T	T	-	-	-	C	C	C	T	C	-	-	-	-	A	A	G	C	T	T	-	A	-	G	G	C	T	T/C	C	G/A	T/C	G/A	G	A	A	G	-	-
ERGANGAI::[B118]	B118		indx	0	A	ERGANGAI::[B118]	B118		indx	102											C	-	-	-	-
SIBEITIZHAO 6::[B128]	B128		indx	0	A	SIBEITIZHAO 6::[B128]	B128		indx	78.5	C	T	C	C	C	C	C	C	C	T	C	-	-	-	-	C	-	G	C	T	T	-	A	-	G	G	C	T	C	C	A	C	A	G	A	A	G	-	-
HONGGENGHANGU3::[B135]	B135		indx	0	A	HONGGENGHANGU3::[B135]	B135		indx	92	C	T	C	C	C	C	C	C	C	T	T	T	A	G	A	C	-	G	C	T	T	-	A	-	G	G	C	T	C	C	A	C	A	G	A	A	G	-	-
BAOXIE-7B::[B155]	B155		indx	0	A	BAOXIE-7B::[B155]	B155		indx	78.5	C	T	T	-	-	-	C	C	C	T	T	T	A	G	A	C	-	G	C	T	T	-	A	-	G	G	C	T	C	C	A	C	A	G	A	A	G	-	-
QINGKE::[B164]	B164		aus	0	A	QINGKE::[B164]	B164		aus	78.5	C	T	T	-	-	-	C	C	C	T	T	T	A	G	A	C	-	G	C	T	T	-	A	-	G	G	C	T	C	C	A	C	A	G	A	A	G	-	-
P1790-5-1M-4-5M-1B-3M-B::[B180]	B180	IRGC 136016	indx	0	A	P1790-5-1M-4-5M-1B-3M-B::[B180]	B180	IRGC 136016	indx	82																		G	C	T	T	-	A	-	G	G	C	T	C	C	A	C	A	G	A		G	-	-
C.MEDIO 7::[B193]	B193	IRGC 135869	indx	0	A	C.MEDIO 7::[B193]	B193	IRGC 135869	indx	70	C	T	C	C	C	C	C	C	C	T	C	-	-	-	-	A	A	G	C	T	T	-	A	-	G	G	C	T		C				G	G	G	G	-	-
TAIZHONGXIANXUAN 2::[B197]	B197		ind1A	0	A	TAIZHONGXIANXUAN 2::[B197]	B197		ind1A	127	C	T	C	C	C	C	C	C	C	T	T	T	A	G	A	A	A	G	C	T			A	-	G	G	C	T	C	C				G			G	-	-
JINYOU 1::[B200]	B200	IRGC 135959	ind1B	0	A	JINYOU 1::[B200]	B200	IRGC 135959	ind1B	59	C	T	T	-	-	-	C	C	C	T	C	-	-	-	-	C	-	G	C	T	T	-	A	-	G	G	C	T	C	C	A	C	A	G	A	A	G	-	-
HONGGU::[B217]	B217		ind1B	0	A	HONGGU::[B217]	B217		ind1B	137	C	T	C	C	C	C	C	C	C	T	T	T	A	G	A	A	A	G	C	T	T	-	C	C	G	G	C	T	C	C	A	C	A	G	A	A	G	-	-
HUHUI 91269::[B243]	B243	IRGC 135910	aus	0	A	HUHUI 91269::[B243]	B243	IRGC 135910	aus	118	C	T	T	-	-	-	C	C	C	T	C	-	-	-	-	A	A	G	C	T	T	-			G	G	C	T	C	C	A	C	A	G	A	A	G	-	-
XIANGAI B::[B252]	B252		indx	0	A	XIANGAI B::[B252]	B252		indx	114	C	T	C	C	C	C	C	C	C	T	T	T	A	G	A	A	A	G	C	T	T	-	A	-	G	G	C	T	C	C	A	C	A	G	A	A	G	-	-
NON SPECIFIED::[B267]	B267		indx	0	A	NON SPECIFIED::[B267]	B267		indx	69	C	T	C	C	C	C	C	C	C	T	C	-	-	-	-	C	-	G	C	T			A	-	G	G	C	T	C	C	A	C	A	G	A	A	G	-	-
UP15::[CX110]	CX110	IRGC 136062	aro	0	A	UP15::[CX110]	CX110	IRGC 136062	aro	110	C	T	T	-	-	-	C	C	C	T	C	-	-	-	-	A	A	G	C	T	T	-			G	G	C	T	C	C	A	C	A	G	A	A	G	-	-
GINGA::[CX112]	CX112	IRGC 135893	admix	0	A	GINGA::[CX112]	CX112	IRGC 135893	admix	121	C	T					C	C	C	T	T	T	A	G	A	A	A	G	C	T	T	-	A	-	G	G	C	T	C	C	A	C	A	G	A	A	G	-	-
TAI-ZHONG-XIAN 10::[CX122]	CX122		indx	0	A	TAI-ZHONG-XIAN 10::[CX122]	CX122		indx	69.5	C	T	T	-	-	-	C	C	C	T	C	-	-	-	-	C	-	G	C	T			A	-	G	G	C	T		C	A	C	A	G	A	A	G	-	-
IRBB7::[CX134]	CX134	IRGC 135948	ind1B	0	A	IRBB7::[CX134]	CX134	IRGC 135948	ind1B	110.5	C	T	C	C	C	C	C	C	C	T	T	T	A	G	A	A	A	G	C	T			A	-	G	G	C	T	C	C	A	C	A	G	A	A	G	-	-
PADI SIAM KUNING::[CX141]	CX141	IRGC 136019	ind3	0	A	PADI SIAM KUNING::[CX141]	CX141	IRGC 136019	ind3	121	C	T	C	C	C	C	C	C	C	T	C	-	-	-	-	C	-	G	C	T	T	-	A	-	G	G	C	T	C	C				G	A	A	G	-	-
HTA7204::[CX144]	CX144	IRGC 135906	indx	0	A	HTA7204::[CX144]	CX144	IRGC 135906	indx	79	C	T	T	-	-	-	C	C	C	T	C	-	-	-	-	A	A	G	C	T	T	-			G	G	C	T	C	C	A	C	A	G	A	A	G	-	-
KARNAL LOCAL::[CX149]	CX149		aro	0	A	KARNAL LOCAL::[CX149]	CX149		aro	124	C	T	C	C	C	C	C	C	C	T	T	T	A	G	A	A	A	G	C	T	T	-	A	-	G	G	C	T	C	C	A	C	A	G	A	A	G	-	-
CHOROFA::[CX150]	CX150	IRGC 135865	ind1B	0	A	CHOROFA::[CX150]	CX150	IRGC 135865	ind1B	106	C	T	C	C	C	C	C	C	C	T	T	T	A	G	A	C	-	G	C	T	T	-	A	-	G	G	C	T	C	C	A	C	A	G	A	A	G	-	-
CISADANE::[CX152]	CX152	IRGC 135866	ind1B	0	A	CISADANE::[CX152]	CX152	IRGC 135866	ind1B	131	C	T	T	-	-	-	C	C	C	T	T	T	A	G	A	A	A	G	C	T	T	-	A	-	G	G	C	T	C	C	A	T/C	A	G	A	A	G	-	-
KHAO DAWK MALI 105::[CX154]	CX154	IRGC 135967	ind3	0	A	KHAO DAWK MALI 105::[CX154]	CX154	IRGC 135967	ind3	133.5	C	T	C	C	C	C	C	C	C	T	C	-	-	-	-	A	A	G	C	T	T	-	A	-	G	G	C	T	C	C	A	C	A	G	A	A	G	-	-
ZIHUI 100::[CX20]	CX20		indx	0	A	ZIHUI 100::[CX20]	CX20		indx	69	C	T	T	-	-	-	C	C	C	T	C	-	-	-	-	C	-	G	C	T			A	-	G	G	C	T	C	C				G	A	A	G	-	-
TYPE3::[CX218]	CX218	IRGC 136061	ind1B	0	A	TYPE3::[CX218]	CX218	IRGC 136061	ind1B	95	C	T	T	-	-	-	C	C	C	T	T	T	A	G	A	C	-	G	C	T	T	-	A	-	G	G	C	T	C	C	A	C	A	G	A	A	G	-	-
IR64-IL::[CX230]	CX230	IRGC 135929	ind1B	0	A	IR64-IL::[CX230]	CX230	IRGC 135929	ind1B	125	C	T	C	C	C	C	C	C	C	T	C	-	-	-	-	A	A	G	C	T	C	C	C	C	G	G	C	T	C	C	A	C	A	G	A	A	G	-	-
IR52561-UBN-1-1-2::[CX231]	CX231	IRGC 135923	indx	0	A	IR52561-UBN-1-1-2::[CX231]	CX231	IRGC 135923	indx	102	C	T	T	-	-	-	C	C	C	T	C	-	-	-	-	C	-	G	C	T	C	C	A	-	G	G	C	T	C	C	A	C	A	G	A	A	G	-	-
NSIC RC9 (APO)::[CX235]	CX235	IRGC 136013	indx	0	A	NSIC RC9 (APO)::[CX235]	CX235	IRGC 136013	indx	137	C	T	C	C	C	C	C	C	C	T	T	T	A	G	A	C	-	G	C	T	C	C	C	C	G	G	C	T	C	C	A	C	A	G	A	A	G	-	-
TKM 9::[CX24]	CX24	IRGC 136058	indx	0	A	TKM 9::[CX24]	CX24	IRGC 136058	indx	87	C	T	C	C	C	C	C	C	C	T	C	-	-	-	-	C	-	G	C	T	T	-	A	-	G	G	C	T	C	C	A	C	A	G	A	A	G	-	-
CARIJO::[CX240]	CX240	IRGC 135859	indx	0	A	CARIJO::[CX240]	CX240	IRGC 135859	indx	123	C	T	C	C	C	C	C	C	C	T	T	T	A	G	A	A	A	G	C	T	T	-	A	-	G	G	C	T	C	C	A	C	A	G	A	A	G	-	-
IR47686-4-4-B-1::[CX242]	CX242	IRGC 135921	admix	0	A	IR47686-4-4-B-1::[CX242]	CX242	IRGC 135921	admix	122	C	T	C	C	C	C	C	C	C	T	T	T	A	G	A	A	A	G	C	T	C	C	A	-	G	G	C	T	C	C	A	C	A	G	A	A	G	-	-
NONA BOKRA::[CX273]	CX273		indx	0	A	NONA BOKRA::[CX273]	CX273		indx	123	C	T	C	C	C	C	C	C	C	T	T	T	A	G	A	A	A	G	C	T	C	C	C	C	G	G	C	T	C	C	A	C	A	G	A	A	G	-	-
IR26::[CX274]	CX274	IRGC 135919	indx	0	A	IR26::[CX274]	CX274	IRGC 135919	indx	116	C	T	C	C	C	C	C	C	C	T	T	T	A	G	A	A	A	G	C	T	T	-	C	C	G	G	C	T	C	C	A	C	A	G	A	A	G	-	-
117::[CX314]	CX314	IRGC 135813	ind1B	0	A	117::[CX314]	CX314	IRGC 135813	ind1B	119	C	T	C	C	C	C	C	C	C	T	T	T	A	G	A	C	-	G	C	T	T	-	A	-	G	G	C	T	C	C	A	C	A	G	A	A	G	-	-
MENGGUANDAMAGU::[CX319]	CX319		indx	0	A	MENGGUANDAMAGU::[CX319]	CX319		indx	93	C	T	T	-	-	-	C	C	C	T	T	T	A	G	A	A	A	G	C	T	T	-			G	G	C	T	C	C	A	C	A	G	A	A	G	-	-
HUA 564::[CX340]	CX340	IRGC 135907	ind1B	0	A	HUA 564::[CX340]	CX340	IRGC 135907	ind1B	95	C	T	T	-	-	-	C	C	C	T	T	T	A	G	A	C	-	G	C	T	T	-	C	C	G	G	C	T	C	C				G			G	-	-
G341::[CX361]	CX361		ind1B	0	A	G341::[CX361]	CX361		ind1B	90											C	-	-	-	-	C	-	G	C	T	T	-	C	C	G	G	C	T	C	C	A	C	A	G	A	A	G	-	-
YZX1::[CX362]	CX362		ind1B	0	A	YZX1::[CX362]	CX362		ind1B	116	C	T	C	C	C	C	C	C	C	T	T	T	A	G	A	C	-	G	C	T			A	-	G	G	C	T	C	C	A	C	A	G	A	A	G	-	-
YZX2::[CX363]	CX363		indx	0	A	YZX2::[CX363]	CX363		indx	92	C	T	C	C	C	C	C	C	C	T	C	-	-	-	-	A	A	G	C	T	T	-	A	-	G	G	C	T		C				G			G	-	-
NERICA-L-1::[CX375]	CX375	IRGC 136004	ind1B	0	A	NERICA-L-1::[CX375]	CX375	IRGC 136004	ind1B	95	C	T	T	-	-	-	C	C	C	T						C	-								G	G	C	T	C	C				G	A	A
KOGOMG 1-1::[CX382]	CX382	IRGC 135971	ind1B	0	A	KOGOMG 1-1::[CX382]	CX382	IRGC 135971	ind1B	68	C	T	T	-	-	-	C	C	C	T	C	-	-	-	-	C	-	G	C	T	T	-	A	-	G	G	C	T	C	C				G	A	A	G	-	-
SARD::[CX392]	CX392	IRGC 136043	indx	0	A	SARD::[CX392]	CX392	IRGC 136043	indx	118	C	T	T	-	-	-	C	C	C	T	C	-	-	-	-	C	-						A	-	G	G	C	T	C	C	A	C	A	G	A	A	G	-	-
MOLIZHANXUAN::[CX394]	CX394	IRGC 135985	ind1B	0	A	MOLIZHANXUAN::[CX394]	CX394	IRGC 135985	ind1B	90.5	C	T	T	-	-	-	C	C	C	T	C	-	-	-	-	A	A	G	C	T	T	-	A	-	G	G	C	T	C	C	A	C	A	G	A	A	G	-	-
CX408::[CX408]	CX408		ind1B	0	A	CX408::[CX408]	CX408		ind1B	125	C	T	C	C	C	C	C	C	C	T	C	-	-	-	-	A	A	G	C	T	T	-	A	-	G	G	C	T	C	C	A	C	A	G	A	A	G	-	-
CX409::[CX409]	CX409		ind1B	0	A	CX409::[CX409]	CX409		ind1B	144	C	T	C	C	C	C	C	C	C	T	C	-	-	-	-	A	A	G	C	T	T	-	C	C	G	G	C	T	C	C	A	C	A	G	A	A	G	-	-
CX410::[CX410]	CX410		ind1B	0	A	CX410::[CX410]	CX410		ind1B	149	C	T	T	-	-	-	C	C	C	T	T	T	A	G	A	A	A	G	C	T	C	C	A	-	G	G	C	T	C	C	A	C	A	G	A	A	G	-	-
CX411::[CX411]	CX411		ind1B	0	A	CX411::[CX411]	CX411		ind1B	110	C	T	C	C	C	C	C	C	C	T	T	T	A	G	A	C	-	G	C	T	C	C	C	C	G	G	C	T	C	C	A	C	A	G	A	A	G	-	-
CX414::[CX414]	CX414		ind1B	0	A	CX414::[CX414]	CX414		ind1B	134	C	T	C	C	C	C	C	C	C	T	C	-	-	-	-	A	A	G	C	T	T	-	A	-	G	G	C	T	C	C	A	C	A	G	A	A	G	-	-
CX416::[CX416]	CX416		ind1B	0	A	CX416::[CX416]	CX416		ind1B	116	C	T	T	-	-	-	C	C	C	T	C	-	-	-	-	A	A	G	C	T	C	C	C	C	G	G	C	T	C	C	A	C	A	G	A	A	G	-	-
CX417::[CX417]	CX417		ind1B	0	A	CX417::[CX417]	CX417		ind1B	118	C	T	C	C	C	C	C	C	C	T	T	T	A	G	A	C	-	G	C	T	T	-	C	C	G	G	C	T	C	C	A	C	A	G	A	A	G	-	-
CX418::[CX418]	CX418		ind1B	0	A	CX418::[CX418]	CX418		ind1B	138	C	T	C	C	C	C	C	C	C	T	T	T	A	G	A	A	A	G	C	T	T	-	A	-	G	G	C	T	C	C	A	C	A	G	A	A	G	-	-
CX419::[CX419]	CX419		ind1B	0	A	CX419::[CX419]	CX419		ind1B	103	C	T	C	C	C	C	C	C	C	T	T	T	A	G	A	A	A	G	C	T	T	-	A	-	G	G	C	T	C	C	A	C	A	G	A	A	G	-	-
CX420::[CX420]	CX420		ind1B	0	A	CX420::[CX420]	CX420		ind1B	124	C	T	T	-	-	-	C	C	C	T	C	-	-	-	-	A	A	G	C	T	C	C	C	C	G	G	C	T	C	C	A	C	A	G	A	A	G	-	-
CX421::[CX421]	CX421		ind1B	0	A	CX421::[CX421]	CX421		ind1B	94	C	T	T	-	-	-	C	C	C	T	T	T	A	G	A	C	-	G	C	T	T	-	C	C	G	G	C	T	C	C	A	C	A	G	A	A	G	-	-
CX422::[CX422]	CX422		ind1B	0	A	CX422::[CX422]	CX422		ind1B	104	C	T	T	-	-	-	C	C	C	T	C	-	-	-	-	A	A	G	C	T	T	-	C	C	G	G	C	T	C	C	A	C	A	G	A	A	G	-	-
CX423::[CX423]	CX423		ind1B	0	A	CX423::[CX423]	CX423		ind1B	115.5	C	T	C	C	C	C	C	C	C	T	T	T	A	G	A	A	A	G	C	T	T	-			G	G	C	T	C	C	A	C	A	G	A	A	G	-	-
CX425::[CX425]	CX425		ind1B	0	A	CX425::[CX425]	CX425		ind1B	83	C	T	T	-	-	-	C	C	C	T	C	-	-	-	-	A	A	G	C	T	T	-	A	-	G	G	C	T	C	C	A	C	A	G	A	A	G	-	-
DHAN4::[CX45]	CX45	IRGC 135877	ind1B	0	A	DHAN4::[CX45]	CX45	IRGC 135877	ind1B	97	C	T	T	-	-	-	C	C	C	T	T	T	A	G	A	A	A	G	C	T	T	-	A	-	G	G	C	T	C	C	A	C	A	G	A	A	G	-	-
DIANDUN 502::[CX52]	CX52	IRGC 135878	indx	0	A	DIANDUN 502::[CX52]	CX52	IRGC 135878	indx	75	C	T	T	-	-	-	C	C	C	T	C	-	-	-	-	C	-	G	C	T	T	-			G	G	C	T	C	C	A	C	A	G	A	A	G	-	-
JIANGXISIMIAO::[CX53]	CX53	IRGC 135954	indx	0	A	JIANGXISIMIAO::[CX53]	CX53	IRGC 135954	indx	116	C	T	C	C	C	C	C	C	C	T	C	-	-	-	-	C	-	G	C	T	T	-	A	-	G	G	C	T	C	C	A	C	A	G	A	A	G	-	-
RR2-6::[CX542]	CX542		indx	0	A	RR2-6::[CX542]	CX542		indx	118.5	C	T	C	C	C	C	C	C	C	T	C	-	-	-	-	A	A	G	C	T	T	-	A	-	G	G	C	T	C	C	A	C	A	G	A	A	G	-	-
ZHONGCHAO 123::[CX57]	CX57		temp	0	A	ZHONGCHAO 123::[CX57]	CX57		temp	88	C	T	C	C	C	C	C	C	C	T	C	-	-	-	-	C	-	G	C	T	T	-	A	-						C				G			G	-	-
JHONA 349::[CX63]	CX63	IRGC 117769	aus	0	A	JHONA 349::[CX63]	CX63	IRGC 117769	aus	98	C	T	T	-	-	-	C	C	C	T	C	-	-	-	-	C	-	G	C	T	T	-			G	G	C	T	C	C	A	C	A	G	A	A	G	-	-
IRAT 352::[CX64]	CX64	IRGC 135943	ind3	0	A	IRAT 352::[CX64]	CX64	IRGC 135943	ind3	85.5	C	T	T	-	-	-	C	C	C	T	C	-	-	-	-	C	-	G	C	T	C	C	A	-	G	G	C	T	C	C	A	C	A	G	A	A	G	-	-
BASMATI 385::[CX72]	CX72	IRGC 135838	aro	0	A	BASMATI 385::[CX72]	CX72	IRGC 135838	aro	82.5											C	-	-	-	-	C	-								G	G	C	T		C	A	C	A	G	A	A	G	-	-
IR6::[CX73]	CX73	IRGC 135927	ind1B	0	A	IR6::[CX73]	CX73	IRGC 135927	ind1B	88											C	-	-	-	-	C	-	G	C	T	T	-	A	-	G	G	C	T	C	C	A	C	A	G	A	A	G	-	-
OM1706::[CX80]	CX80	IRGC 136014	ind1B	0	A	OM1706::[CX80]	CX80	IRGC 136014	ind1B	96	C	T	T	-	-	-	C	C	C	T	T	T	A	G	A	C	-	G	C	T	T	-	A	-	G	G	C	T	C	C	A	C	A	G	A	A	G	-	-
X21::[CX82]	CX82	IRGC 136073	ind1B	0	A	X21::[CX82]	CX82	IRGC 136073	ind1B	128	C	T	T	-	-	-	C	C	C	T	T	T	A	G	A	A	A	G	C	T	T	-	A	-	G	G	C	T	C	C	A	C	A	G	A	A	G	-	-
X22::[CX83]	CX83	IRGC 136074	ind1B	0	A	X22::[CX83]	CX83	IRGC 136074	ind1B	110	C	T	T	-	-	-	C	C	C	T	C	-	-	-	-	A	A	G	C	T	T	-	A	-	G	G	C	T	C	C	A	C	A	G	A	A	G	-	-
C71::[CX85]	CX85		indx	0	A	C71::[CX85]	CX85		indx	90	C	T	T	-	-	-	C	C	C	T	C	-	-	-	-	A	A	G	C	T	T	-	A	-	G	G	C	T	C	C	A	C	A	G	A	A	G	-	-
Q5::[CX87]	CX87	IRGC 136027	indx	0	A	Q5::[CX87]	CX87	IRGC 136027	indx	50	C	T	T	-	-	-	C	C	C	T	C	-	-	-	-	A	A	G	C	T	T	-	C	C						C			A	G	A	A	G	-	-
FENGAIZHAN::[CX9]	CX9		ind1B	0	A	FENGAIZHAN::[CX9]	CX9		ind1B	42																							A	-	G	G	C	T						G			G	-	-
AJAYA::[CX96]	CX96	IRGC 135824	ind1B	0	A	AJAYA::[CX96]	CX96	IRGC 135824	ind1B	99	C	T	T	-	-	-	C	C	C	T	C	-	-	-	-	A	A	G	C	T	T	-	A	-	G	G	C	T	C	C	A	C	A	G	A	A	G	-	-
DODDI::[CX99]	CX99	IRGC 135883	ind2	0	A	DODDI::[CX99]	CX99	IRGC 135883	ind2	136	C	T	C	C	C	C	C	C	C	T	C	-	-	-	-	A	A	G	C	T	C	C	A	-	G	G	C	T	C	C	A	C	A	G	A	A	G	-	-
SUWEON 311::IRGC 61890-1::[IRIS 313-10000]	IRIS 313-10000	IRGC 125907	ind1B	0	A	SUWEON 311::IRGC 61890-1::[IRIS 313-10000]	IRIS 313-10000	IRGC 125907	ind1B	88.5	C	T	T	-/C	-/C	-/C	C	C	C	T	C	-/T	-/A	-/G	-/A	A	A/T	G	C	T			A	-/T	G	G	C	T	T/C	C	A	C	A	G	A	A	G	-/T	-/A
MILYANG 77::IRGC 69340-1::[IRIS 313-10040]	IRIS 313-10040	IRGC 125840	ind1B	0	A	MILYANG 77::IRGC 69340-1::[IRIS 313-10040]	IRIS 313-10040	IRGC 125840	ind1B	51	C	T	T	-	-	-	C	C	C	T	C	-	-	-	-	C	-	G	C	T	T	-	A	-	G	G	C	T	C	C				G			G	-	-
EX EBOKOZURU::IRGC 79912-1::[IRIS 313-10109]	IRIS 313-10109	IRGC 125735	ind3	0	A	EX EBOKOZURU::IRGC 79912-1::[IRIS 313-10109]	IRIS 313-10109	IRGC 125735	ind3	109	C	T	C	C	C	C	C	C	C	T	T	T	A	G	A	A	A	G	C	T	T	-	A	-	G	G	C	T	C	C	A	C	A	G	A	A	G	-	-
BR IRGA 409::IRGC 55915-1::[IRIS 313-10161]	IRIS 313-10161	IRGC 125691	ind1B	0	A	BR IRGA 409::IRGC 55915-1::[IRIS 313-10161]	IRIS 313-10161	IRGC 125691	ind1B	81.5											C	-	-	-	-	C	-	G	C	T	T	-	A	-	G	G	C	T	C	C	A	C	A	G	A	A	G	-	-
MEI FENG 9::IRGC 63735-1::[IRIS 313-10168]	IRIS 313-10168	IRGC 125836	indx	0	A	MEI FENG 9::IRGC 63735-1::[IRIS 313-10168]	IRIS 313-10168	IRGC 125836	indx	103	C	T	C	C	C	C	C	C	C	T	T	T	A	G	A	C	-	G	C	T	T	-	A	-	G	G	C	T	C	C	A	C	A	G	A	A	G	-	-
PSBRC 50::IRGC 99706-1::[IRIS 313-10234]	IRIS 313-10234	IRGC 125873	ind1B	0	A	PSBRC 50::IRGC 99706-1::[IRIS 313-10234]	IRIS 313-10234	IRGC 125873	ind1B	101	C	T	T	-	-	-	C	C	C	T	C	-	-	-	-	C	-	G	C	T	C	C	C	C	G	G	C	T	C	C	A	C	A	G	A	A	G	-	-
PSBRC 68::IRGC 99711-1::[IRIS 313-10235]	IRIS 313-10235	IRGC 125874	indx	0	A	PSBRC 68::IRGC 99711-1::[IRIS 313-10235]	IRIS 313-10235	IRGC 125874	indx	132	C	T	T	-	-	-	C	C	C	T	T	T	A	G	A	C	-	G	C	T	T	-	A	-	G	G	C	T	C	C	A	C	A	G	A	A	G	-	-
FONAIAP 2::IRGC 116985-1::[IRIS 313-10268]	IRIS 313-10268	IRGC 127072	indx	0	A	FONAIAP 2::IRGC 116985-1::[IRIS 313-10268]	IRIS 313-10268	IRGC 127072	indx	68.5	C	T					C	C	C	T	C	-	-	-	-	C	-	G	C	T	T	-	C	C	G	G	C	T	C	C	A	C	A	G	A	A	G	-	-
IA CUBA 17::IRGC 116990-1::[IRIS 313-10271]	IRIS 313-10271	IRGC 125966	indx	0	A	IA CUBA 17::IRGC 116990-1::[IRIS 313-10271]	IRIS 313-10271	IRGC 125966	indx	91.5	C	T	C	C	C	C	C	C	C	T	T	T	A	G	A	A	A	G	C	T	T	-	A	-	G	G	C	T	C	C	A	C	A	G	A	A	G	-	-
ELONI::IRGC 116980-1::[IRIS 313-10290]	IRIS 313-10290	IRGC 125963	ind1B	0	A	ELONI::IRGC 116980-1::[IRIS 313-10290]	IRIS 313-10290	IRGC 125963	ind1B	75.5	C	T	T	-	-	-	C	C	C	T	C	-	-	-	-	A	A						A	-	G	G	C	T	C	C	A	C	A	G	A	A	G	-	-
B 4414 F-MR-6-3::IRGC 117310-1::[IRIS 313-10332]	IRIS 313-10332	IRGC 126044	indx	0	A	B 4414 F-MR-6-3::IRGC 117310-1::[IRIS 313-10332]	IRIS 313-10332	IRGC 126044	indx	84.5	C	T	C	C	C	C	C	C	C	T	C	-	-	-	-	C	-	G	C	T	T	-	A	-	G	G	C	T	C	C	A	C	A	G	A	A	G	-	-
B 6149 F-MR-7::IRGC 117314-1::[IRIS 313-10337]	IRIS 313-10337	IRGC 125953	indx	0	A	B 6149 F-MR-7::IRGC 117314-1::[IRIS 313-10337]	IRIS 313-10337	IRGC 125953	indx	119	C	T	T	-	-	-	C	C	C	T	C	-	-	-	-	A	A	G	C	T	T	-	C	C	G	G	C	T	C	C	A	C	A	G	A	A	G	-	-
HP 3319-2WX-6-4-1-B::IRGC 117331-1::[IRIS 313-10353]	IRIS 313-10353	IRGC 127049	indx	0	A	HP 3319-2WX-6-4-1-B::IRGC 117331-1::[IRIS 313-10353]	IRIS 313-10353	IRGC 127049	indx	74	C	T	T	-	-	-	C	C	C	T	C	-	-	-	-	C	-						A	-	G	G	C	T		C				G	A	A	G	-	-
IR 63295-AC 209-7::IRGC 117365-1::[IRIS 313-10361]	IRIS 313-10361	IRGC 127053	indx	0	A	IR 63295-AC 209-7::IRGC 117365-1::[IRIS 313-10361]	IRIS 313-10361	IRGC 127053	indx	74	C	T	T	-	-	-	C	C	C	T	C	-	-	-	-	C	-	G	C	T	T	-	A	-	G	G	C	T	C	C	A	C	A	G	A	A	G	-	-
IR 73690-7-2-1-1-3-2-2-1::IRGC 117384-1::[IRIS 313-10380]	IRIS 313-10380	IRGC 125981	aus	0	A	IR 73690-7-2-1-1-3-2-2-1::IRGC 117384-1::[IRIS 313-10380]	IRIS 313-10380	IRGC 125981	aus	79	C	T	T	-	-	-	C	C	C	T	C	-	-	-	-	C	-	G	C	T	T	-	A	-					C	C	A	C	A	G	A	A	G	-	-
IR 80310-12-B-1-3-B::IRGC 117307-1::[IRIS 313-10394]	IRIS 313-10394	IRGC 125986	indx	0	A	IR 80310-12-B-1-3-B::IRGC 117307-1::[IRIS 313-10394]	IRIS 313-10394	IRGC 125986	indx	102	C	T	C	C	C	C	C	C	C	T	T	T	A	G	A	C	-	G	C	T	T	-	A	-	G	G	C	T	C	C	A	C	A	G	A	A	G	-	-
IRGA 370-42-1-1F-C-1::IRGC 117343-1::[IRIS 313-10401]	IRIS 313-10401	IRGC 125989	ind1B	0	A	IRGA 370-42-1-1F-C-1::IRGC 117343-1::[IRIS 313-10401]	IRIS 313-10401	IRGC 125989	ind1B	60	C	T	T	-	-	-	C	C	C	T	C	-	-	-	-	C	-	G	C	T	T	-			G	G	C	T	C	C				G		A	G	-	-
WAR 72-2-1-1::IRGC 117361-1::[IRIS 313-10421]	IRIS 313-10421	IRGC 121154	indx	0	A	WAR 72-2-1-1::IRGC 117361-1::[IRIS 313-10421]	IRIS 313-10421	IRGC 121154	indx	79	C	T	T	-	-	-	C	C	C	T	C	-	-	-	-	C	-	G	C	T			A	-	G	G	C	T	C	C				G			G	-	-
YN 1353-3::IRGC 117363-1::[IRIS 313-10423]	IRIS 313-10423	IRGC 121160	indx	0	A	YN 1353-3::IRGC 117363-1::[IRIS 313-10423]	IRIS 313-10423	IRGC 121160	indx	92	C	T	T	-	-	-	C	C	C	T	C	-	-	-	-	C	-	G	C	T	T	-			G	G	C	T	C	C	A	C	A	G	A	A	G	-	-
KHAYANGYA D 34-181::IRGC 5861-2::[IRIS 313-10518]	IRIS 313-10518	IRGC 128088	indx	0	A	KHAYANGYA D 34-181::IRGC 5861-2::[IRIS 313-10518]	IRIS 313-10518	IRGC 128088	indx	102	C	T	T	-	-	-	C	C	C	T	C	-	-	-	-	C	-	G	C	T	T	-	A	-	G	G	C	T	C	C	A	C	A	G	A	A	G	-	-
221 BC 4-1-45-10::IRGC 6865-1::[IRIS 313-10550]	IRIS 313-10550	IRGC 135561	indx	0	A	221 BC 4-1-45-10::IRGC 6865-1::[IRIS 313-10550]	IRIS 313-10550	IRGC 135561	indx	93	C	T					C	C	C	T	T	T	A	G	A	C	-	G	C	T	C	C	A	-	G	G	C	T	C	C	A	C	A	G	A	A	G	-	-
221 B 36-1-1-1-1::IRGC 7585-1::[IRIS 313-10565]	IRIS 313-10565	IRGC 127098	indx	0	A	221 B 36-1-1-1-1::IRGC 7585-1::[IRIS 313-10565]	IRIS 313-10565	IRGC 127098	indx	49.5	C	T	T	-	-	-	C	C	C	T	C	-	-	-	-			G	C	T	T	-	A	-	G	G	C	T	C	C			A	G	A	A	G	-	-
KAYANGYA D 402::IRGC 7927-2::[IRIS 313-10575]	IRIS 313-10575	IRGC 128074	indx	0	A	KAYANGYA D 402::IRGC 7927-2::[IRIS 313-10575]	IRIS 313-10575	IRGC 128074	indx	64.5	C	T	T	-	-	-	C	C	C	T	C	-	-	-	-			G	C	T	C	C	A	-	G	G	C	T	C	C	A	C	A	G	A	A	G	-	-
DB 3::IRGC 8361-1::[IRIS 313-10587]	IRIS 313-10587	IRGC 127308	aus	0	A	DB 3::IRGC 8361-1::[IRIS 313-10587]	IRIS 313-10587	IRGC 127308	aus	81	C	T	T	-	-	-	C	C	C	T	C	-	-	-	-	C	-	G	C	T	T	-	A	-	G	G	C	T	C	C	A	C	A	G	A	A	G	-	-
DL 5::IRGC 8593-1::[IRIS 313-10595]	IRIS 313-10595	IRGC 127327	aus	0	A	DL 5::IRGC 8593-1::[IRIS 313-10595]	IRIS 313-10595	IRGC 127327	aus	62																C	-	G	C	T	T	-			G	G	C	T	C	C	A	C	A	G	A	A
DD 126::IRGC 8667-1::[IRIS 313-10598]	IRIS 313-10598	IRGC 128273	aus	0	A	DD 126::IRGC 8667-1::[IRIS 313-10598]	IRIS 313-10598	IRGC 128273	aus	66	C	T	T	-	-	-	C	C	C	T	T	T	A	G	A								A	-	G	G	C	T	C	C	A	C	A	G	A	A	G	-	-
UCP 41::IRGC 8742-1::[IRIS 313-10600]	IRIS 313-10600	IRGC 128493	aus	0	A	UCP 41::IRGC 8742-1::[IRIS 313-10600]	IRIS 313-10600	IRGC 128493	aus	49											C	-	-	-	-			G	C	T	T	-	A	-	G	G	C	T		C				G	A	A	G	-	-
DV 2::IRGC 8806-1::[IRIS 313-10604]	IRIS 313-10604	IRGC 127347	aus	0	A	DV 2::IRGC 8806-1::[IRIS 313-10604]	IRIS 313-10604	IRGC 127347	aus	54	C	T	T	-	-	-	C	C	C	T	C	-	-	-	-	C	-	G	C	T	T	-	C	C	G	G	C	T	C	C	A	C	A	G	A	A	G	-	-
KA SAEN::IRGC 11642-1::[IRIS 313-10654]	IRIS 313-10654	IRGC 128335	ind3	0	A	KA SAEN::IRGC 11642-1::[IRIS 313-10654]	IRIS 313-10654	IRGC 128335	ind3	74.5	C	T	C	C	C	C	C	C	C	T	C	-	-	-	-	C	-	G	C	T	T	-			G	G	C	T	T/C	C	A	C	A	G	A	A	G	-	-
PERIYA VELLAI::IRGC 15475-1::[IRIS 313-10717]	IRIS 313-10717	IRGC 127725	ind2	0	A	PERIYA VELLAI::IRGC 15475-1::[IRIS 313-10717]	IRIS 313-10717	IRGC 127725	ind2	114	C	T	T	-	-	-	C	C	C	T	C	-	-	-	-	C	-	G	C	T	T	-	A	-	G	G	C	T	C	C	A	C	A	G	A	A	G	-	-
ERNEST::IRGC 15884-2::[IRIS 313-10725]	IRIS 313-10725	IRGC 128518	indx	0	A	ERNEST::IRGC 15884-2::[IRIS 313-10725]	IRIS 313-10725	IRGC 128518	indx	101	C	T	T	-	-	-	C	C	C	T	T	T	A	G	A	A	A	G	C	T	T	-	C	C	G	G	C	T	C	C	A	C	A	G	A	A	G	-	-
GHAIYA::IRGC 16286-1::[IRIS 313-10737]	IRIS 313-10737	IRGC 128297	aus	0	A	GHAIYA::IRGC 16286-1::[IRIS 313-10737]	IRIS 313-10737	IRGC 128297	aus	76.5	C	T	T	-	-	-	C	C	C	T	C	-	-	-	-	C	-	G	C	T	T	-	C	C	G	G	C	T	C	C	A	C	A	G	A	A	G	-	-
GADABUNG (GUNDIL)::IRGC 17569-2::[IRIS 313-10768]	IRIS 313-10768	IRGC 132423	ind3	0	A	GADABUNG (GUNDIL)::IRGC 17569-2::[IRIS 313-10768]	IRIS 313-10768	IRGC 132423	ind3	72	C	T	T	-	-	-	C	C	C	T	C	-	-	-	-	C	-	G	C	T	T	-	A	-	G	G	C	T	C	C	A	C	A	G	A	A	G	-	-
INDEL::IRGC 17748-2::[IRIS 313-10775]	IRIS 313-10775	IRGC 128056	indx	0	A	INDEL::IRGC 17748-2::[IRIS 313-10775]	IRIS 313-10775	IRGC 128056	indx	89	C	T	T	-	-	-	C	C	C	T	T	T	A	G	A	C	-	G	C	T			A	-	G	G	C	T	C	C	A	C	A	G	A	A	G	-	-
KAMAS::IRGC 17785-1::[IRIS 313-10777]	IRIS 313-10777	IRGC 127483	ind3	0	A	KAMAS::IRGC 17785-1::[IRIS 313-10777]	IRIS 313-10777	IRGC 127483	ind3	71	C	T	C	C	C	C	C	C	C	T	T	T	A	G	A	C	-	G	C	T	T	-	A	-	G	G	C	T	C	C	G	T	G	G	G/A	G/A	G	-	-
KERAN DUKUH::IRGC 17822-2::[IRIS 313-10779]	IRIS 313-10779	IRGC 128521	ind3	0	A	KERAN DUKUH::IRGC 17822-2::[IRIS 313-10779]	IRIS 313-10779	IRGC 128521	ind3	121	C	T	C	C	C	C	C	C	C	T	T	T	A	G	A	C	-	G	C	T	T	-	C	C	G	G	C	T	C	C	A	C	A	G	A	A	G	-	-
SEGON BENGGALA::IRGC 18724-1::[IRIS 313-10810]	IRIS 313-10810	IRGC 135793	ind3	0	A	SEGON BENGGALA::IRGC 18724-1::[IRIS 313-10810]	IRIS 313-10810	IRGC 135793	ind3	94	C	T	C	C	C	C	C	C	C	T	C	-	-	-	-	A	A	G	C	T	T	-	A	-	G	G	C	T	C	C	A	C	A	G	A	A	G	-	-
SEMPOR::IRGC 18761-2::[IRIS 313-10811]	IRIS 313-10811	IRGC 128160	indx	0	A	SEMPOR::IRGC 18761-2::[IRIS 313-10811]	IRIS 313-10811	IRGC 128160	indx	78	C	T	T	-	-	-	C	C	C	T	C	-	-	-	-	C	-	G	C	T	T	-			G	G	C	T	C	C	A	C	A	G	A	A	G	-	-
SERUNEN::IRGC 18789-1::[IRIS 313-10812]	IRIS 313-10812	IRGC 135794	ind3	0	A	SERUNEN::IRGC 18789-1::[IRIS 313-10812]	IRIS 313-10812	IRGC 135794	ind3	112	C	T	T	-	-	-	C	C	C	T	C	-	-	-	-	A	A	G	C	T	T	-	A	-	G	G	C	T	C	C	A	C	A	G	A	A	G	-	-
SIBORAS::IRGC 18816-2::[IRIS 313-10814]	IRIS 313-10814	IRGC 128163	ind3	0	A	SIBORAS::IRGC 18816-2::[IRIS 313-10814]	IRIS 313-10814	IRGC 128163	ind3	126	C	T	T	-	-	-	C	C	C	T	C	-	-	-	-	A	A	G	C	T	C	C	A	-	G	G	C	T	C	C	A	C	A	G	A	A	G	-	-
HOING CANTEL::IRGC 19282-2::[IRIS 313-10824]	IRIS 313-10824	IRGC 128053	ind3	0	A	HOING CANTEL::IRGC 19282-2::[IRIS 313-10824]	IRIS 313-10824	IRGC 128053	ind3	122	C	T	C	C	C	C	C	C	C	T	T	T	A	G	A	A	A	G	C	T	C	C			G	G	C	T	C	C	A	C	A	G	A	A	G	-	-
LUBUK LINGGAU::IRGC 20000-2::[IRIS 313-10842]	IRIS 313-10842	IRGC 128099	ind3	0	A	LUBUK LINGGAU::IRGC 20000-2::[IRIS 313-10842]	IRIS 313-10842	IRGC 128099	ind3	73	C	T					C	C	C	T	C	-	-	-	-	C	-	G	C	T	T	-	A	-	G	G	C	T	C	C	A	C	A	G	A	A	G	-	-
ARC 5756::IRGC 20220-2::[IRIS 313-10845]	IRIS 313-10845	IRGC 132418	aus	0	A	ARC 5756::IRGC 20220-2::[IRIS 313-10845]	IRIS 313-10845	IRGC 132418	aus	101.5	C	T	C	C	C	C	C	C	C	T	C	-	-	-	-	C	-	G	C	T	C	C	A	-	G	G	C	T	C	C	A	C	A	G	A	A	G	-	-
ARC 11322::IRGC 21315-2::[IRIS 313-10863]	IRIS 313-10863	IRGC 127937	ind2	0	A	ARC 11322::IRGC 21315-2::[IRIS 313-10863]	IRIS 313-10863	IRGC 127937	ind2	110.5	C	T					C	C	C	T	T	T	A	G	A	A	A	G	C	T	C	C			G	G	C	T	C	C	A	C	A	G	A	A	G	-	-
ARC 11338::IRGC 21329-1::[IRIS 313-10864]	IRIS 313-10864	IRGC 127136	admix	0	A	ARC 11338::IRGC 21329-1::[IRIS 313-10864]	IRIS 313-10864	IRGC 127136	admix	109	C	T	T	-	-	-	C	C	C	T	C	-	-	-	-	C	-	G	C	T	T	-			G	G	C	T	C	C	A	C	A	G	A	A	G	-	-
ARC 12079::IRGC 21888-1::[IRIS 313-10877]	IRIS 313-10877	IRGC 127143	aus	0	A	ARC 12079::IRGC 21888-1::[IRIS 313-10877]	IRIS 313-10877	IRGC 127143	aus	49											C	-	-	-	-	C	-	G	C	T			A	-	G	G	C	T	C	C		C		G	A	A	G	-	-
ARC 12101::IRGC 21907-1::[IRIS 313-10878]	IRIS 313-10878	IRGC 127144	aus	0	A	ARC 12101::IRGC 21907-1::[IRIS 313-10878]	IRIS 313-10878	IRGC 127144	aus	82	C	T	T	-	-	-	C	C	C	T	C	-	-	-	-	A	A	G	C	T	T	-			G	G	C	T	C	C	A	C	A	G	A	A	G	-	-
DAMNOEUB POR HING::IRGC 22841-2::[IRIS 313-10900]	IRIS 313-10900	IRGC 132331	ind3	0	A	DAMNOEUB POR HING::IRGC 22841-2::[IRIS 313-10900]	IRIS 313-10900	IRGC 132331	ind3	85	C	T	T	-	-	-	C	C	C	T	C	-	-	-	-	C	-	G	C	T	T	-	A	-	G	G	C	T	C	C	A	C	A	G	A	A	G	-	-
MARECH S V R::IRGC 23011-2::[IRIS 313-10907]	IRIS 313-10907	IRGC 128105	ind3	0	A	MARECH S V R::IRGC 23011-2::[IRIS 313-10907]	IRIS 313-10907	IRGC 128105	ind3	49	C	T	T	-	-	-	C	C	C	T	C	-	-	-	-										G	G	C	T	C	C	A	C	A	G	A	A	G	-	-
NEANG MAC::IRGC 23071-1::[IRIS 313-10910]	IRIS 313-10910	IRGC 135777	ind3	0	A	NEANG MAC::IRGC 23071-1::[IRIS 313-10910]	IRIS 313-10910	IRGC 135777	ind3	66	C	T	T	-	-	-	C	C	C	T	C	-	-	-	-	C	-	G	C	T	T	-			G	G	C	T	C	C				G		A	G	-	-
KHAO' SIM::IRGC 24094-1::[IRIS 313-10928]	IRIS 313-10928	IRGC 128342	ind3	0	A	KHAO' SIM::IRGC 24094-1::[IRIS 313-10928]	IRIS 313-10928	IRGC 128342	ind3	86	C	T	C	C	C	C	C	C	C	T	C	-	-	-	-	A	A	G	C	T	T	-			G	G	C	T	C	C	A	C	A	G	A	A	G	-	-
PAH PIANG::IRGC 24452-2::[IRIS 313-10934]	IRIS 313-10934	IRGC 128125	ind3	0	A	PAH PIANG::IRGC 24452-2::[IRIS 313-10934]	IRIS 313-10934	IRGC 128125	ind3	91	C	T	T	-	-	-	C	C	C	T	T	T	A	G	A	C	-	G	C	T					G	G	C	T	C	C	A	C	A	G	A	A	G	-	-
SIGUPAI::IRGC 24642-2::[IRIS 313-10938]	IRIS 313-10938		ind3	0	A	SIGUPAI::IRGC 24642-2::[IRIS 313-10938]	IRIS 313-10938		ind3	115	C	T	T	-	-	-	C	C	C	T	C	-	-	-	-	C	-	G	C	T			C	C	G	G	C	T	C	C	A	C	A	G	A	A	G	-	-
SINTHA::IRGC 24687-1::[IRIS 313-10941]	IRIS 313-10941	IRGC 127809	indx	0	A	SINTHA::IRGC 24687-1::[IRIS 313-10941]	IRIS 313-10941	IRGC 127809	indx	121.5	C	T	C	C	C	C	C	C	C	T	C	-	-	-	-	C	-	G	C	T	T	-	A	-	G	G	C	T	C	C	A	C	A	G	A	A	G	-	-
PADI BENOT::IRGC 24757-2::[IRIS 313-10943]	IRIS 313-10943	IRGC 135631	ind3	0	A	PADI BENOT::IRGC 24757-2::[IRIS 313-10943]	IRIS 313-10943	IRGC 135631	ind3	110	C	T	C	C	C	C	C	C	C	T	C	-	-	-	-	C	-	G	C	T	T	-	A	-	G	G	C	T	C	C	A	C	A	G	A	A	G	-	-
TERUNG DAUN::IRGC 25823-2::[IRIS 313-10962]	IRIS 313-10962	IRGC 128182	ind3	0	A	TERUNG DAUN::IRGC 25823-2::[IRIS 313-10962]	IRIS 313-10962	IRGC 128182	ind3	108	C	T	T	-	-	-	C	C	C	T	T	T	A	G	A	C	-	G	C	T	T	-	A	-	G	G	C	T	C	C	A	C	A	G	A	A	G	-	-
KATAKCHIKON::IRGC 25880-1::[IRIS 313-10963]	IRIS 313-10963	IRGC 127497	aus	0	A	KATAKCHIKON::IRGC 25880-1::[IRIS 313-10963]	IRIS 313-10963	IRGC 127497	aus	119.5	C	T	T	-	-	-	C	C	C	T	C	-	-	-	-	A	A	G	C	T	T	-	A	-	G	G	C	T	C	C	A	C	A	G	A	A	G	-	-
TILOKCHAN (SONABETHI)::IRGC 25927-1::[IRIS 313-10965]	IRIS 313-10965	IRGC 127859	aus	0	A	TILOKCHAN (SONABETHI)::IRGC 25927-1::[IRIS 313-10965]	IRIS 313-10965	IRGC 127859	aus	81	C	T	T	-	-	-	C	C	C	T	C	-	-	-	-	C	-	G	C	T	T	-			G	G	C	T	C	C	A	C	A	G	A	A	G	-	-
ASE BAKKA LOMPO::IRGC 26988-2::[IRIS 313-10995]	IRIS 313-10995	IRGC 127976	ind3	0	A	ASE BAKKA LOMPO::IRGC 26988-2::[IRIS 313-10995]	IRIS 313-10995	IRGC 127976	ind3	91	C	T	T	-	-	-	C	C	C	T	C	-	-	-	-	C	-	G	C	T	T	-			G	G	C	T	C	C	A	C	A	G	A	A	G	-	-
CEMPO MANGGAR::IRGC 27107-1::[IRIS 313-10997]	IRIS 313-10997	IRGC 127250	ind3	0	A	CEMPO MANGGAR::IRGC 27107-1::[IRIS 313-10997]	IRIS 313-10997	IRGC 127250	ind3	111.5	C	T	T	-	-	-	C	C	C	T	C	-	-	-	-	C	-				T	-	A	-	G	G	C	T	C	C	A	C	A	G	A	A	G	-	-
LOROI::IRGC 27567-1::[IRIS 313-11017]	IRIS 313-11017	IRGC 128369	aus	0	A	LOROI::IRGC 27567-1::[IRIS 313-11017]	IRIS 313-11017	IRGC 128369	aus	75	C	T	T	-	-	-	C	C	C	T	C	-	-	-	-	C	-	G	C	T	T	-			G	G	C	T	C	C	A	C	A	G	A	A	G	-	-
MADISA::IRGC 27568-1::[IRIS 313-11018]	IRIS 313-11018	IRGC 127586	aus	0	A	MADISA::IRGC 27568-1::[IRIS 313-11018]	IRIS 313-11018	IRGC 127586	aus	90	C	T	T	-	-	-	C	C	C	T	C	-	-	-	-	A	A	G	C	T	T	-	A	-	G	G	C	T	C	C	A	C	A	G	A	A	G	-	-
MOTIA::IRGC 28036-1::[IRIS 313-11028]	IRIS 313-11028	IRGC 128393	aus	0	A	MOTIA::IRGC 28036-1::[IRIS 313-11028]	IRIS 313-11028	IRGC 128393	aus	74.5	C	T	T	-	-	-	C	C	C	T	C	-	-	-	-	C	-	G	C	T	T	-			G	G	C	T	C	C	A	C	A	G	A	A	G	-	-
MUTANT 12-42::IRGC 28076-1::[IRIS 313-11030]	IRIS 313-11030		aro	0	A	MUTANT 12-42::IRGC 28076-1::[IRIS 313-11030]	IRIS 313-11030		aro	89	C	T	T	-	-	-	C	C	C	T	C	-	-	-	-	A	A	G	C	T	T	-	A	-	G	G	C	T	C	C	A	C	A	G	A	A	G	-	-
34::IRGC 28371-2::[IRIS 313-11036]	IRIS 313-11036	IRGC 127919	aus	0	A	34::IRGC 28371-2::[IRIS 313-11036]	IRIS 313-11036	IRGC 127919	aus	78							C	C	C	T	C	-	-	-	-	C	-	G	C	T	T	-			G	G	C	T	C	C	A	C	A	G	A	A	G	-	-
BENGKA KERSEK::IRGC 28666-1::[IRIS 313-11043]	IRIS 313-11043		ind3	0	A	BENGKA KERSEK::IRGC 28666-1::[IRIS 313-11043]	IRIS 313-11043		ind3	103	C	T	T	-	-	-	C	C	C	T	C	-	-	-	-			G	C	T	T	-	A	-	G	G	C	T	C	C	A	C	A	G	A	A	G	-	-
AUS 84::IRGC 28947-2::[IRIS 313-11047]	IRIS 313-11047	IRGC 127977	aus	0	A	AUS 84::IRGC 28947-2::[IRIS 313-11047]	IRIS 313-11047	IRGC 127977	aus	120	C	T	T	-	-	-	C	C	C	T	C	-	-	-	-	A	A	G	C	T	T	-	A	-	G	G	C	T	C	C	A	C	A	G	A	A	G	-	-
AUS 171::IRGC 29004-1::[IRIS 313-11048]	IRIS 313-11048	IRGC 127178	aus	0	A	AUS 171::IRGC 29004-1::[IRIS 313-11048]	IRIS 313-11048	IRGC 127178	aus	107	C	T	T	-	-	-	C	C	C	T	C	-	-	-	-	A	A	G	C	T	T	-	A	-	G	G	C	T	C	C	A	C	A	G	A	A	G	-	-
AUS 299::IRGC 29087-1::[IRIS 313-11055]	IRIS 313-11055	IRGC 127185	aus	0	A	AUS 299::IRGC 29087-1::[IRIS 313-11055]	IRIS 313-11055	IRGC 127185	aus	125	C	T	T	-	-	-	C	C	C	T	C	-	-	-	-	C	-	G	C	T	T	-	A	-	G	G	C	T	C	C	A	C	A	G	A	A	G	-	-
AUS 449::IRGC 29230-1::[IRIS 313-11061]	IRIS 313-11061	IRGC 127190	aus	0	A	AUS 449::IRGC 29230-1::[IRIS 313-11061]	IRIS 313-11061	IRGC 127190	aus	68.5	C	T					C	C	C	T	C	-	-	-	-	C	-								G	G	C	T	C	C	A	C	A	G	A	A	G	-	-
GASMAL 339::IRGC 29333-1::[IRIS 313-11066]	IRIS 313-11066	IRGC 127381	admix	0	A	GASMAL 339::IRGC 29333-1::[IRIS 313-11066]	IRIS 313-11066	IRGC 127381	admix	99	C	T	C	C	C	C	C	C	C	T	T	T	A	G	A	A	A	G	C	T	T	-	A	-	G	G	C	T	C	C	A	C	A	G	A	A	G	-	-
TUPA 15-3::IRGC 29416-2::[IRIS 313-11069]	IRIS 313-11069	IRGC 128197	aro	0	A	TUPA 15-3::IRGC 29416-2::[IRIS 313-11069]	IRIS 313-11069	IRGC 128197	aro	69	C	T	T	-	-	-	C	C	C	T	C	-	-	-	-	C	-	G	C	T	T	-			G	G	C	T	C	C	A	C	A	G	A	A	G	-	-
CHAO LEP NOK::IRGC 29451-2::[IRIS 313-11072]	IRIS 313-11072	IRGC 128012	ind3	0	A	CHAO LEP NOK::IRGC 29451-2::[IRIS 313-11072]	IRIS 313-11072	IRGC 128012	ind3	79	C	T	T	-	-	-	C	C	C	T	C	-	-	-	-	C	-	G	C	T	T	-			G	G	C	T	C	C	A	C	A	G	A	A	G	-	-
PHAE MEUN LAN::IRGC 29660-1::[IRIS 313-11080]	IRIS 313-11080	IRGC 128430	ind3	0	A	PHAE MEUN LAN::IRGC 29660-1::[IRIS 313-11080]	IRIS 313-11080	IRGC 128430	ind3	74	C	T	T	-	-	-	C	C	C	T	C	-	-	-	-	C	-	G	C	T					G	G	C	T	C	C	A	C	A	G	A	A	G	-	-
KHAO THAMA::IRGC 29838-2::[IRIS 313-11086]	IRIS 313-11086	IRGC 128087	ind3	0	A	KHAO THAMA::IRGC 29838-2::[IRIS 313-11086]	IRIS 313-11086	IRGC 128087	ind3	44	C	T	T	-	-	-	C	C	C	T	C	-	-	-	-	C	-	G	C	T	T	-	A	-	G	G	C	T		C
KEO LAI::IRGC 29969-2::[IRIS 313-11090]	IRIS 313-11090	IRGC 128076	ind3	0	A	KEO LAI::IRGC 29969-2::[IRIS 313-11090]	IRIS 313-11090	IRGC 128076	ind3	41	C	T	T	-	-	-	C	C	C	T	C	-	-	-	-	C	-								G	G	C	T	C	C	A	C	A	G	A	A	G	-	-
IR 1813-694-2::IRGC 32656-2::[IRIS 313-11122]	IRIS 313-11122	IRGC 128059	ind1B	0	A	IR 1813-694-2::IRGC 32656-2::[IRIS 313-11122]	IRIS 313-11122	IRGC 128059	ind1B	74.5	C	T	T	-	-	-	C	C	C	T	C	-	-	-	-	C	-	G	C	T	T	-	A	-	G	G	C	T	C	C	A	C	A	G	A	A	G	-	-
LWANKHAN::IRGC 33330-1::[IRIS 313-11133]	IRIS 313-11133	IRGC 127582	ind3	0	A	LWANKHAN::IRGC 33330-1::[IRIS 313-11133]	IRIS 313-11133	IRGC 127582	ind3	69											C	-	-	-	-	C	-	G	C	T	T	-			G	G	C	T	C	C	A	C	A	G	A	A	G	-	-
SONA AUS::IRGC 35160-1::[IRIS 313-11175]	IRIS 313-11175	IRGC 127821	aus	0	A	SONA AUS::IRGC 35160-1::[IRIS 313-11175]	IRIS 313-11175	IRGC 127821	aus	64	C	T					C	C	C	T	C	-	-	-	-	C	-	G	C	T	T	-			G	G	C	T	C	C	A	C	A	G	A	A	G	-	-
SI OMPAN LAMA::IRGC 35481-1::[IRIS 313-11179]	IRIS 313-11179	IRGC 127810	ind3	0	A	SI OMPAN LAMA::IRGC 35481-1::[IRIS 313-11179]	IRIS 313-11179	IRGC 127810	ind3	61	C	T	T	-	-	-	C	C	C	T	C	-	-	-	-			G	C	T	T	-	A	-	G	G	C	T		C			A	G	A	A	G	-	-
BKN 7130-1017-2::IRGC 36531-2::[IRIS 313-11192]	IRIS 313-11192	IRGC 127997	ind3	0	A	BKN 7130-1017-2::IRGC 36531-2::[IRIS 313-11192]	IRIS 313-11192	IRGC 127997	ind3	90	C	T	T	-	-	-	C	C	C	T	C	-	-	-	-	C	-	G	C	T	T	-			G	G	C	T	C	C	A	C	A	G	A	A	G	-	-
NARIKEL BADI::IRGC 37550-1::[IRIS 313-11213]	IRIS 313-11213	IRGC 127648	aus	0	A	NARIKEL BADI::IRGC 37550-1::[IRIS 313-11213]	IRIS 313-11213	IRGC 127648	aus	49.5	C	T	T	-	-	-	C	C	C	T	C	-	-	-	-	C	-	G	C	T					G	G	C	T	C	C	A	C	A	G	A	A	G	-	-
PATNAI 31-679::IRGC 38149-2::[IRIS 313-11224]	IRIS 313-11224	IRGC 128130	ind2	0	A	PATNAI 31-679::IRGC 38149-2::[IRIS 313-11224]	IRIS 313-11224	IRGC 128130	ind2	99	C	T	T	-	-	-	C	C	C	T	C	-	-	-	-	C	-	G	C	T	T	-	A	-	G	G	C	T	C	C	A	C	A	G	A	A	G	-	-
SADAJIRA 19-339::IRGC 38361-2::[IRIS 313-11228]	IRIS 313-11228	IRGC 128155	ind2	0	A	SADAJIRA 19-339::IRGC 38361-2::[IRIS 313-11228]	IRIS 313-11228	IRGC 128155	ind2	86.5	C	T	T	-	-	-	C	C	C	T	C	-	-	-	-	C	-	G	C	T	T	-	A	-	G	G	C	T	C	C	A	C	A	G	A	A	G	-	-
B 737 G-KN-23-1::IRGC 39203-2::[IRIS 313-11239]	IRIS 313-11239	IRGC 127978	indx	0	A	B 737 G-KN-23-1::IRGC 39203-2::[IRIS 313-11239]	IRIS 313-11239	IRGC 127978	indx	131.5	C	T	C	C	C	C	C	C	C	T	C	-	-	-	-	C	-	G	C	T	T	-			G	G	C	T	C	C	A	C	A	G	A	A	G	-	-
CR 157-392-4::IRGC 39247-2::[IRIS 313-11240]	IRIS 313-11240	IRGC 128020	indx	0	A	CR 157-392-4::IRGC 39247-2::[IRIS 313-11240]	IRIS 313-11240	IRGC 128020	indx	119.5	C	T	C	C	C	C	C	C	C	T	C	-	-	-	-	A	A	G	C	T	T	-	C	C	G	G	C	T	C	C	A	C	A	G	A	A	G	-	-
IR 4500-5-1-1::IRGC 40552-2::[IRIS 313-11251]	IRIS 313-11251	IRGC 132340	ind1B	0	A	IR 4500-5-1-1::IRGC 40552-2::[IRIS 313-11251]	IRIS 313-11251	IRGC 132340	ind1B	108.5	C	T	T	-	-	-	C	C	C	T	T	T	A	G	A	C	-	G	C	T	C	C	C	C	G	G	C	T	C	C	A	C	A	G	A	A	G	-	-
SML CAMPONI::IRGC 40642-1::[IRIS 313-11253]	IRIS 313-11253		indx	0	A	SML CAMPONI::IRGC 40642-1::[IRIS 313-11253]	IRIS 313-11253		indx	125	C	T	T	-	-	-	C	C	C	T	T	T	A	G	A	C	-	G	C	T	T	-	A	-	G	G	C	T	C	C	A	C	A	G	A	A	G	-	-
ARC 14398::IRGC 41544-2::[IRIS 313-11268]	IRIS 313-11268	IRGC 127957	aro	0	A	ARC 14398::IRGC 41544-2::[IRIS 313-11268]	IRIS 313-11268	IRGC 127957	aro	66.5	C	T	T	-	-	-	C	C	C	T	C	-	-	-	-	C	-	G	C	T	T	-	A	-	G	G	C	T	C	C	A	C	A	G	A	A	G	-	-
ARC 14632::IRGC 41650-2::[IRIS 313-11269]	IRIS 313-11269	IRGC 127958	indx	0	A	ARC 14632::IRGC 41650-2::[IRIS 313-11269]	IRIS 313-11269	IRGC 127958	indx	142.5	C	T	C	C	C	C	C	C	C	T	T	T	A	G	A	A	A	G	C	T	C	C	A	-	G	G	C	T	C	C	A	C	A	G	A	A	G	-	-
ARC 15319::IRGC 42007-1::[IRIS 313-11278]	IRIS 313-11278		indx	0	A	ARC 15319::IRGC 42007-1::[IRIS 313-11278]	IRIS 313-11278		indx	113	C	T	C	C	C	C	C	C	C	T	T	T	A	G	A	C	-	G	C	T			A	-	G	G	C	T	C	C	A	C	A	G	A	A	G	-	-
ARC 15455::IRGC 42040-2::[IRIS 313-11279]	IRIS 313-11279	IRGC 127967	indx	0	A	ARC 15455::IRGC 42040-2::[IRIS 313-11279]	IRIS 313-11279	IRGC 127967	indx	120.5	C	T	T	-/C	-/C	-/C	C	C	C	T	T	C/T	A/C	C/G	A	A	A	G	C	T	T	-	A	-	G	G	C	T	C	C	A	C	A	G	A	A	G	-	-
ARC 15486::IRGC 42055-1::[IRIS 313-11280]	IRIS 313-11280	IRGC 135735	indx	0	A	ARC 15486::IRGC 42055-1::[IRIS 313-11280]	IRIS 313-11280	IRGC 135735	indx	94	C	T					C	C	C	T	C	-	-	-	-			G	C	T	T	-	A	-	G	G	C	T	C	C	A	C	A	G	A	A	G	-	-
ARC 18578::IRGC 42459-2::[IRIS 313-11289]	IRIS 313-11289	IRGC 127971	aro	0	A	ARC 18578::IRGC 42459-2::[IRIS 313-11289]	IRIS 313-11289	IRGC 127971	aro	128	C	T	C	C	C	C	C	C	C	T	C	-	-	-	-	A	A	G	C	T	C	C	A	-	G	G	C	T	C	C	A	C	A	G	A	A	G	-	-
ARC 14899::IRGC 43016-1::[IRIS 313-11302]	IRIS 313-11302	IRGC 127154	indx	0	A	ARC 14899::IRGC 43016-1::[IRIS 313-11302]	IRIS 313-11302	IRGC 127154	indx	119	C	T	T	-	-	-	C	C	C	T	C	-	-	-	-	C	-	G	C	T	C	C			G	G	C	T	C	C	A	C	A	G	A	A	G	-	-
ARC 15387::IRGC 43175-2::[IRIS 313-11307]	IRIS 313-11307	IRGC 127965	indx	0	A	ARC 15387::IRGC 43175-2::[IRIS 313-11307]	IRIS 313-11307	IRGC 127965	indx	66	C	T	T	-	-	-	C	C	C	T	C	-	-	-	-	A	A	G	C	T	T	-	A	-	G	G	C	T	C	C	A	C	A	G	A	A	G	-	-
JAO' HAWN MAE JAN::IRGC 44022-2::[IRIS 313-11327]	IRIS 313-11327	IRGC 128061	ind3	0	A	JAO' HAWN MAE JAN::IRGC 44022-2::[IRIS 313-11327]	IRIS 313-11327	IRGC 128061	ind3	67	C	T	C	C	C	C	C	C	C	T	C	-	-	-	-	C	-	G	C	T	T	-	A	-	G	G	C	T	C	C	A	C	A	G	A	A	G	-	-
ALAMINOS::IRGC 44268-2::[IRIS 313-11330]	IRIS 313-11330	IRGC 132236	ind3	0	A	ALAMINOS::IRGC 44268-2::[IRIS 313-11330]	IRIS 313-11330	IRGC 132236	ind3	83	C	T	T	-	-	-	C	C	C	T	C	-	-	-	-	A	A	G	C	T	T	-			G	G	C	T	C	C	A			G			G	-	-
AMPIPIT::IRGC 44272-2::[IRIS 313-11331]	IRIS 313-11331	IRGC 132237	ind3	0	A	AMPIPIT::IRGC 44272-2::[IRIS 313-11331]	IRIS 313-11331	IRGC 132237	ind3	87											C	-	-	-	-	A	A	G	C	T			A	-	G	G	C	T	C	C	A	C	A	G	A	A	G	-	-
LOBANG (WHITE)::IRGC 44548-2::[IRIS 313-11338]	IRIS 313-11338	IRGC 128097	indx	0	A	LOBANG (WHITE)::IRGC 44548-2::[IRIS 313-11338]	IRIS 313-11338	IRGC 128097	indx	133	C	T	T	-	-	-	C	C	C	T	C	-	-	-	-	A	A	G	C	T	C	C	C	C	G	G	C	T	C	C	A	C	A	G	A	A	G	-	-
MINDANAO::IRGC 44642-2::[IRIS 313-11341]	IRIS 313-11341	IRGC 128110	ind3	0	A	MINDANAO::IRGC 44642-2::[IRIS 313-11341]	IRIS 313-11341	IRGC 128110	ind3	79	C	T	T	-	-	-	C	C	C	T	C	-	-	-	-	C	-	G	C	T					G	G	C	T	C	C	A	C	A	G	A	A	G	-	-
CR 579-1-3::IRGC 45443-2::[IRIS 313-11357]	IRIS 313-11357	IRGC 128021	ind1B	0	A	CR 579-1-3::IRGC 45443-2::[IRIS 313-11357]	IRIS 313-11357	IRGC 128021	ind1B	78	C	T	T	-	-	-	C	C	C	T	C	-	-	-	-	A	A	G	C	T	T	-	A	-	G	G	C	T	C	C	A	C	A	G	A	A	G	-	-
RANACHANDRABHOG::IRGC 46567-2::[IRIS 313-11369]	IRIS 313-11369	IRGC 128146	ind2	0	A	RANACHANDRABHOG::IRGC 46567-2::[IRIS 313-11369]	IRIS 313-11369	IRGC 128146	ind2	89	C	T	T	-	-	-	C	C	C	T	C	-	-	-	-	A	A	G	C	T	T	-	A	-	G	G	C	T	C	C	A	C	A	G	A	A	G	-	-
KHAO DAWK MALI TIA::IRGC 47773-2::[IRIS 313-11386]	IRIS 313-11386	IRGC 128083	ind3	0	A	KHAO DAWK MALI TIA::IRGC 47773-2::[IRIS 313-11386]	IRIS 313-11386	IRGC 128083	ind3	84	C	T	T	-	-	-	C	C	C	T	C	-	-	-	-	C	-	G	C	T	T	-	A	-	G	G	C	T	C	C	A	C	A	G	A	A	G	-	-
SAHM RUANG NAK::IRGC 47818-1::[IRIS 313-11387]	IRIS 313-11387		ind3	0	A	SAHM RUANG NAK::IRGC 47818-1::[IRIS 313-11387]	IRIS 313-11387		ind3	95	C	T	T	-	-	-	C	C	C	T	C	-	-	-	-	C	-	G	C	T	T	-							C	C	A	C	A	G	A	A	G	-	-
GLAM::IRGC 47978-2::[IRIS 313-11388]	IRIS 313-11388	IRGC 132250	ind3	0	A	GLAM::IRGC 47978-2::[IRIS 313-11388]	IRIS 313-11388	IRGC 132250	ind3	77.5	C	T	T	-	-	-	C	C	C	T	C	-	-	-	-	C	-	G	C	T	T	-	A	-	G	G	C	T	C	C				G	A	A	G	-	-
INDO NO 13030::IRGC 48630-2::[IRIS 313-11394]	IRIS 313-11394	IRGC 128057	indx	0	A	INDO NO 13030::IRGC 48630-2::[IRIS 313-11394]	IRIS 313-11394	IRGC 128057	indx	115	C	T					C	C	C	T	C	-	-	-	-	C	-	G	C	T	T	-	A	-	G	G	C	T	C	C	A	C	A	G	A	A	G	-	-
KARUNJEERAGA SAMBA::IRGC 49774-1::[IRIS 313-11414]	IRIS 313-11414	IRGC 127495	indx	0	A	KARUNJEERAGA SAMBA::IRGC 49774-1::[IRIS 313-11414]	IRIS 313-11414	IRGC 127495	indx	67	C	T	T	-	-	-	C	C	C	T	C	-	-	-	-	A	A	G	C	T	T	-	A	-	G	G	C	T	C	C	A	C	A	G	A	A	G	-	-
MATALI::IRGC 49891-2::[IRIS 313-11418]	IRIS 313-11418	IRGC 128106	ind2	0	A	MATALI::IRGC 49891-2::[IRIS 313-11418]	IRIS 313-11418	IRGC 128106	ind2	101	C	T					C	C	C	T	C	-	-	-	-	A	A	G	C	T			A	-	G	G	C	T	C	C	A	C	A	G	A	A	G	-	-
C 166-135::IRGC 50633-1::[IRIS 313-11431]	IRIS 313-11431	IRGC 127244	ind3	0	A	C 166-135::IRGC 50633-1::[IRIS 313-11431]	IRIS 313-11431	IRGC 127244	ind3	95	C	T	T	-	-	-	C	C	C	T	C	-	-	-	-	A	A	G	C	T			C	C	G	G	C	T	C	C	A	C	A	G	A	A	G	-	-
ARC 18533::IRGC 51756-1::[IRIS 313-11443]	IRIS 313-11443	IRGC 127161	indx	0	A	ARC 18533::IRGC 51756-1::[IRIS 313-11443]	IRIS 313-11443	IRGC 127161	indx	111	C	T	T	-	-	-	C	C	C	T						A	A	G	C	T	T	-	C	C	G	G	C	T	C	C	A	C	A	G	A	A	G	-	-
LOCAL BHAT::IRGC 52343-1::[IRIS 313-11452]	IRIS 313-11452	IRGC 127571	aus	0	A	LOCAL BHAT::IRGC 52343-1::[IRIS 313-11452]	IRIS 313-11452	IRGC 127571	aus	67	C	T					C	C	C	T	C	-	-	-	-	C	-						A	-	G	G	C	T	C	C	A	C	A	G	A	A	G	-	-
BARI SUTAR::IRGC 52410-1::[IRIS 313-11454]	IRIS 313-11454	IRGC 127211	aus	0	A	BARI SUTAR::IRGC 52410-1::[IRIS 313-11454]	IRIS 313-11454	IRGC 127211	aus	73	C	T	T	-	-	-	C	C	C	T	C	-	-	-	-	A	A	G	C	T	T	-	A	-	G	G	C	T	C	C							G	-	-
MACAPAGAL::IRGC 52927-1::[IRIS 313-11467]	IRIS 313-11467	IRGC 128372	ind3	0	A	MACAPAGAL::IRGC 52927-1::[IRIS 313-11467]	IRIS 313-11467	IRGC 128372	ind3	96	C	T	T	-/C	-/C	-/C	C	C	C	T	C	-/C	-/C	-/C	-	C	-	G	C	T	T	-	C	C	G	G	C	T	C	C	A	C	A	G	A	A	G	-	-
CULALANSI::IRGC 53109-1::[IRIS 313-11471]	IRIS 313-11471	IRGC 132397	indx	0	A	CULALANSI::IRGC 53109-1::[IRIS 313-11471]	IRIS 313-11471	IRGC 132397	indx	91	C	T	T	-	-	-	C	C	C	T	T	T	A	G	A	C	-	G	C	T			A	-	G	G	C	T	C	C	A	C	A	G	A	A	G	-	-
BANGBANG::IRGC 53131-1::[IRIS 313-11472]	IRIS 313-11472		ind3	0	A	BANGBANG::IRGC 53131-1::[IRIS 313-11472]	IRIS 313-11472		ind3	88	C	T	T	-	-	-	C	C	C	T	T	T	A	G	A	A	A	G	C	T	T	-	A	-	G	G	C	T	C	C	A	C	A	G	A	A	G	-	-
KALIPINCH::IRGC 53271-1::[IRIS 313-11476]	IRIS 313-11476	IRGC 128329	aus	0	A	KALIPINCH::IRGC 53271-1::[IRIS 313-11476]	IRIS 313-11476	IRGC 128329	aus	98	C	T	T	-	-	-	C	C	C	T	C	-	-	-	-	A	A	G	C	T	T	-			G	G	C	T	C	C				G		A	G	-	-
PR 106::IRGC 53418-1::[IRIS 313-11480]	IRIS 313-11480	IRGC 127742	ind1B	0	A	PR 106::IRGC 53418-1::[IRIS 313-11480]	IRIS 313-11480	IRGC 127742	ind1B	71	C	T	T	-	-	-	C	C	C	T	C	-	-	-	-	C	-	G	C	T			A	-	G	G	C	T	C	C				G	A	A	G	-	-
BOTESHSHORE::IRGC 53484-1::[IRIS 313-11483]	IRIS 313-11483	IRGC 128244	aus	0	A	BOTESHSHORE::IRGC 53484-1::[IRIS 313-11483]	IRIS 313-11483	IRGC 128244	aus	113.5	C	T	T	-	-	-	C	C	C	T	C	-	-	-	-	A	A	G	C	T	T	-	A	-	G	G	C	T	C	C	A	C	A	G	A	A	G	-	-
RAMINAD (GERMAN)::IRGC 53058-1::[IRIS 313-11485]	IRIS 313-11485		ind3	0	A	RAMINAD (GERMAN)::IRGC 53058-1::[IRIS 313-11485]	IRIS 313-11485		ind3	101	C	T	C	C	C	C	C	C	C	T	C	-	-	-	-	A	A	G	C	T	T	-	A	-	G	G	C	T	C	C				G			G	-	-
BKN BR 1031-78-5-4::IRGC 55927-1::[IRIS 313-11515]	IRIS 313-11515	IRGC 127231	indx	0	A	BKN BR 1031-78-5-4::IRGC 55927-1::[IRIS 313-11515]	IRIS 313-11515	IRGC 127231	indx	91	C	T	T	-	-	-	C	C	C	T	T	T	A	G	A	C	-	G	C	T	T	-	A	-	G	G	C	T	C	C	A	C	A	G	A	A	G	-	-
TAN NONG::IRGC 56126-1::[IRIS 313-11521]	IRIS 313-11521	IRGC 127847	indx	0	A	TAN NONG::IRGC 56126-1::[IRIS 313-11521]	IRIS 313-11521	IRGC 127847	indx	80.5	C	T	C	C	C	C	C	C	C	T	C	-	-	-	-	A	A	G	C	T	T	-	A	-	G	G	C	T	C	C				G	A	A	G	-	-
PAH DI MI RAHK::IRGC 57398-1::[IRIS 313-11535]	IRIS 313-11535	IRGC 132288	ind3	0	A	PAH DI MI RAHK::IRGC 57398-1::[IRIS 313-11535]	IRIS 313-11535	IRGC 132288	ind3	85	C	T	T	-	-	-	C	C	C	T	C	-	-	-	-	C	-	G	C	T	T	-	A	-	G	G	C	T	C	C	A	C	A	G	A	A	G	-	-
TAUNG LWIN::IRGC 58222-1::[IRIS 313-11548]	IRIS 313-11548	IRGC 127850	indx	0	A	TAUNG LWIN::IRGC 58222-1::[IRIS 313-11548]	IRIS 313-11548	IRGC 127850	indx	90	C	T					C	C	C	T	C	-	-	-	-	C	-								G	G	C	T	C	C	A	C	A	G	A	A	G	-	-
PA WOON::IRGC 58656-1::[IRIS 313-11555]	IRIS 313-11555	IRGC 135578	indx	0	A	PA WOON::IRGC 58656-1::[IRIS 313-11555]	IRIS 313-11555	IRGC 135578	indx	117	C	T	T	-	-	-	C	C	C	T	C	-	-	-	-	A	A	G	C	T	T	-	A	-	G	G	C	T	C	C	A	C	A	G	A	A	G	-	-
TUBMAN::IRGC 58682-1::[IRIS 313-11556]	IRIS 313-11556	IRGC 132051	ind3	0	A	TUBMAN::IRGC 58682-1::[IRIS 313-11556]	IRIS 313-11556	IRGC 132051	ind3	67	C	T	T	-	-	-	C	C	C	T						A	A	G	C	T					G	G	C	T	C	C	A	C	A	G	A	A	G	-	-
NULI::IRGC 58824-1::[IRIS 313-11558]	IRIS 313-11558	IRGC 127684	ind2	0	A	NULI::IRGC 58824-1::[IRIS 313-11558]	IRIS 313-11558	IRGC 127684	ind2	88	C	T	T	-	-	-	C	C	C	T	C	-	-	-	-			G	C	T	T	-			G	G	C	T	C	C	A	C	A	G	A	A	G	-	-
PANDRI PAREWA::IRGC 61030-1::[IRIS 313-11603]	IRIS 313-11603	IRGC 128425	aus	0	A	PANDRI PAREWA::IRGC 61030-1::[IRIS 313-11603]	IRIS 313-11603	IRGC 128425	aus	86	C	T	T	-	-	-	C	C	C	T	C	-	-	-	-	A	A	G	C	T	T	-	A	-	G	G	C	T	C	C				G	A	A	G	-	-
MAE HAWM::IRGC 61283-1::[IRIS 313-11609]	IRIS 313-11609	IRGC 127587	ind3	0	A	MAE HAWM::IRGC 61283-1::[IRIS 313-11609]	IRIS 313-11609	IRGC 127587	ind3	82	C	T	T	-	-	-	C	C	C	T						A	A				T	-	A	-	G	G	C	T	C	C	A	C	A	G	A	A	G	-	-
UPRH 33::IRGC 61505-1::[IRIS 313-11617]	IRIS 313-11617	IRGC 128495	aus	0	A	UPRH 33::IRGC 61505-1::[IRIS 313-11617]	IRIS 313-11617	IRGC 128495	aus	92	C	T					C	C	C	T	T	T	A	G	A	A	A	G	C	T	T	-	A	-	G	G	C	T	C	C	A	C	A	G	A	A	G	-	-
UPRH 58::IRGC 61525-1::[IRIS 313-11618]	IRIS 313-11618	IRGC 127879	aus	0	A	UPRH 58::IRGC 61525-1::[IRIS 313-11618]	IRIS 313-11618	IRGC 127879	aus	87	C	T	T	-	-	-	C	C	C	T	C	-	-	-	-	A	A	G	C	T	T	-	A	-	G	G	C	T	C	C	A	C		G	A	A	G	-	-
UPRH 197::IRGC 61641-1::[IRIS 313-11620]	IRIS 313-11620	IRGC 127876	aus	0	A	UPRH 197::IRGC 61641-1::[IRIS 313-11620]	IRIS 313-11620	IRGC 127876	aus	107	C	T	C	C	C	C	C	C	C	T	T	T	A	G	A	C	-	G	C	T	T	-	A	-	G	G	C	T	C	C	A	C		G	A	A	G	-	-
POHHERLIMASION::IRGC 62025-1::[IRIS 313-11630]	IRIS 313-11630	IRGC 127737	aro	0	A	POHHERLIMASION::IRGC 62025-1::[IRIS 313-11630]	IRIS 313-11630	IRGC 127737	aro	105	C	T	T	-	-	-	C	C	C	T	C	-	-	-	-	A	A	G	C	T	C	C	C	C	G	G	C	T	C	C	A	C	A	G	A	A	G	-	-
NCS 271 A::IRGC 62216-1::[IRIS 313-11636]	IRIS 313-11636	IRGC 127654	aus	0	A	NCS 271 A::IRGC 62216-1::[IRIS 313-11636]	IRIS 313-11636	IRGC 127654	aus	87																C	-	G	C	T	T	-	A	-	G	G	C	T	C	C	A	C	A	G	A	A	G	-	-
NCS 603 B::IRGC 62377-1::[IRIS 313-11643]	IRIS 313-11643	IRGC 127662	ind1B	0	A	NCS 603 B::IRGC 62377-1::[IRIS 313-11643]	IRIS 313-11643	IRGC 127662	ind1B	142.5	C	T	C	C	C	C	C	C	C	T	T	T	A	G	A	A	A	G	C	T	C	C	C	C	G	G	C	T	C	C	A	C	A	G	A	A	G	-	-
NCS 771 A::IRGC 62483-1::[IRIS 313-11646]	IRIS 313-11646	IRGC 127665	ind2	0	A	NCS 771 A::IRGC 62483-1::[IRIS 313-11646]	IRIS 313-11646	IRGC 127665	ind2	130	C	T	T	-	-	-	C	C	C	T	T	T	A	G	A	A	A	G	C	T	T	-	A	-	G	G	C	T	C	C	A	C	A	G	A	A	G	-	-
NCS 809 A::IRGC 62502-1::[IRIS 313-11647]	IRIS 313-11647	IRGC 127666	ind2	0	A	NCS 809 A::IRGC 62502-1::[IRIS 313-11647]	IRIS 313-11647	IRGC 127666	ind2	91	C	T	T	-	-	-	C	C	C	T	C	-	-	-	-	C	-	G	C	T	T	-			G	G	C	T	C	C	A	C	A	G	A	A	G	-	-
B 3913 B 16-20 ST 28::IRGC 63099-1::[IRIS 313-11656]	IRIS 313-11656	IRGC 127196	indx	0	A	B 3913 B 16-20 ST 28::IRGC 63099-1::[IRIS 313-11656]	IRIS 313-11656	IRGC 127196	indx	139.5	C	T					C	C	C	T	C	-	-	-	-	A	A	G	C	T	C	C	C	C	G	G	C	T	C	C	A	C	A	G	A	A	G	-	-
EX WUKARI (WILD)::IRGC 63214-1::[IRIS 313-11657]	IRIS 313-11657		ind2	0	A	EX WUKARI (WILD)::IRGC 63214-1::[IRIS 313-11657]	IRIS 313-11657		ind2	142.5	C	T	T	-	-	-	C	C	C	T	T	T	A	G	A	A	A	G	C	T	C	C	A	-	G	G	C	T	C	C	G/A	C	G/A	G	A	A	G	-	-
CUN GU NUO::IRGC 63576-1::[IRIS 313-11664]	IRIS 313-11664	IRGC 127288	indx	0	A	CUN GU NUO::IRGC 63576-1::[IRIS 313-11664]	IRIS 313-11664	IRGC 127288	indx	150	C	T	C	C	C	C	C	C	C	T	C	-/T	-/A	-/G	-/A	A	A/T	G	C	T			C	C/T	G	G	C	T	C	C	A	C	A	G	A	A	G	-/T	-/A
RONG DAO 4::IRGC 63820-1::[IRIS 313-11668]	IRIS 313-11668	IRGC 127771	ind1A	0	A	RONG DAO 4::IRGC 63820-1::[IRIS 313-11668]	IRIS 313-11668	IRGC 127771	ind1A	151	C	T	C	C	C	C	C	C	C	T	T	T	A	G	A	A	A	G	C	T	T	-	A	-/C	G	G	C	T	C	C	A	C	A	G	A	A	G	-/C	-
E MOOM::IRGC 64291-1::[IRIS 313-11676]	IRIS 313-11676	IRGC 127359	ind3	0	A	E MOOM::IRGC 64291-1::[IRIS 313-11676]	IRIS 313-11676	IRGC 127359	ind3	116	C	T	T	-	-	-	C	C	C	T	C	-	-	-	-	A	A	G	C	T	T	-	C	C	G	G	C	T	C	C	A	C	A	G	A	A	G	-	-
E NAWN KHAO::IRGC 64293-1::[IRIS 313-11677]	IRIS 313-11677	IRGC 128286	ind3	0	A	E NAWN KHAO::IRGC 64293-1::[IRIS 313-11677]	IRIS 313-11677	IRGC 128286	ind3	149	C	T	C	C	C	C	C	C	C	T	C	-	-	-	-	A	A	G	C	T	C	C	C	C	G	G	C	T	C	C	A	C	A	G	A	A	G	-	-
E PLUAK::IRGC 64297-1::[IRIS 313-11678]	IRIS 313-11678	IRGC 127360	ind3	0	A	E PLUAK::IRGC 64297-1::[IRIS 313-11678]	IRIS 313-11678	IRGC 127360	ind3	94.5	C	T	T	-	-	-	C	C	C	T	C	-	-	-	-	A	A	G	C	T	T	-	A	-	G	G	C	T	C	C	A	C	A	G	A	A	G	-	-
KHAO' PAWM::IRGC 64416-2::[IRIS 313-11681]	IRIS 313-11681	IRGC 132426	ind3	0	A	KHAO' PAWM::IRGC 64416-2::[IRIS 313-11681]	IRIS 313-11681	IRGC 132426	ind3	153.5	C	T	C	C	C	C	C	C	C	T	T	T	A	G	A	A	A	G	C	T	T	-	C	C	G	G	C	T	C	C	A	C	A	G	A	A	G	-	-
MA EUE::IRGC 64502-1::[IRIS 313-11682]	IRIS 313-11682	IRGC 127588	ind3	0	A	MA EUE::IRGC 64502-1::[IRIS 313-11682]	IRIS 313-11682	IRGC 127588	ind3	82	C	T	T	-	-	-	C	C	C	T	T	T	A	G	A	C	-	G	C	T			A	-	G	G	C	T	C	C	A	C	A	G	A	A	G	-	-
QUAHNG LUANG::IRGC 64609-2::[IRIS 313-11686]	IRIS 313-11686	IRGC 132366	ind3	0	A	QUAHNG LUANG::IRGC 64609-2::[IRIS 313-11686]	IRIS 313-11686	IRGC 132366	ind3	151	C	T	C	C	C	C	C	C	C	T	T	T	A	G	A	A	A	G	C	T	T	-	A	-	G	G	C	T	C	C	A	C	A	G	A	A	G	-	-
BAHN DAENG::IRGC 65771-1::[IRIS 313-11704]	IRIS 313-11704		ind3	0	A	BAHN DAENG::IRGC 65771-1::[IRIS 313-11704]	IRIS 313-11704		ind3	143	C	T	C	C	C	C	C	C	C	T	T	T	A	G	A	A	A	G	C	T	T	-	A	-	G	G	C	T	C	C	A	C	A	G	A	A	G	-	-
DAWK PUD KHAO::IRGC 65808-1::[IRIS 313-11705]	IRIS 313-11705	IRGC 127303	ind3	0	A	DAWK PUD KHAO::IRGC 65808-1::[IRIS 313-11705]	IRIS 313-11705	IRGC 127303	ind3	138	C	T	T	-	-	-	C	C	C	T	C	-	-	-	-	A	A	G	C	T	C	C	A	-	G	G	C	T	T/C	C	A	C	A	G	A	A	G	-	-
KHAO' NOK 4::IRGC 65932-1::[IRIS 313-11706]	IRIS 313-11706	IRGC 132001	ind3	0	A	KHAO' NOK 4::IRGC 65932-1::[IRIS 313-11706]	IRIS 313-11706	IRGC 132001	ind3	128	C	T	C	C	C	C	C	C	C	T	C	-	-	-	-	A	A	G	C	T	T	-	C	C	G	G	C	T	C	C				G	A	A	G	-	-
GORA DHAN 2::IRGC 66269-1::[IRIS 313-11712]	IRIS 313-11712	IRGC 127389	aus	0	A	GORA DHAN 2::IRGC 66269-1::[IRIS 313-11712]	IRIS 313-11712	IRGC 127389	aus	114	C	T	C	C	C	C	C	C	C	T	T	T	A	G	A	A	A	G	C	T	C	C	C	C	G	G	C	T	C	C	A	C	A	G	A	A	G	-	-
GAEW DAENG::IRGC 66707-1::[IRIS 313-11721]	IRIS 313-11721	IRGC 127372	ind3	0	A	GAEW DAENG::IRGC 66707-1::[IRIS 313-11721]	IRIS 313-11721	IRGC 127372	ind3	141	C	T	T	-	-	-	C	C	C	T	T	T	A	G	A	A	A	G	C	T	C	C	C	C	G	G	C	T	C	C	A	C	A	G	A	A	G	-	-
DISSIGBE::IRGC 66916-1::[IRIS 313-11723]	IRIS 313-11723	IRGC 127320	ind2	0	A	DISSIGBE::IRGC 66916-1::[IRIS 313-11723]	IRIS 313-11723	IRGC 127320	ind2	139	C	T	C	C	C	C	C	C	C	T	T	T	A	G	A	A	A	G	C	T	C	C	C	C	G	G	C	T	C	C	A	C	A	G	A	A	G	-	-
QING ER XIAO 2::IRGC 67255-1::[IRIS 313-11730]	IRIS 313-11730	IRGC 127753	indx	0	A	QING ER XIAO 2::IRGC 67255-1::[IRIS 313-11730]	IRIS 313-11730	IRGC 127753	indx	143.5	C	T	C	C	C	C	C	C	C	T	T	T	A	G	A	A	A	G	C	T	T	-	C	C	G	G	C	T	C	C	A	C	A	G	A	A
CHUNDI::IRGC 67486-1::[IRIS 313-11737]	IRIS 313-11737	IRGC 127283	aus	0	A	CHUNDI::IRGC 67486-1::[IRIS 313-11737]	IRIS 313-11737	IRGC 127283	aus	144.5	C	T	C	C	C	C	C	C	C	T	T	T	A	G	A	A	A	G	C	T	C	C	C	C	G	G	C	T	C	C	G/A	T/C	G/A	G	A	A	G	-	-
L 10833::IRGC 68121-1::[IRIS 313-11751]	IRIS 313-11751	IRGC 127539	indx	0	A	L 10833::IRGC 68121-1::[IRIS 313-11751]	IRIS 313-11751	IRGC 127539	indx	136	C	T	T	-	-	-	C	C	C	T	C	-	-	-	-	A	A	G	C	T	T	-/C	A	-/C	G	G	C	T	C	C	A	C	A	G	A	A	G	-/C	-
P 335::IRGC 69001-1::[IRIS 313-11765]	IRIS 313-11765	IRGC 127696	aro	0	A	P 335::IRGC 69001-1::[IRIS 313-11765]	IRIS 313-11765	IRGC 127696	aro	62	C	T	T	-	-	-	C	C	C	T	C	-	-	-	-	C	-	G	C	T	T	-	A	-	G	G	C	T	C	C	A	C	A	G	A	A	G	-	-
TSIMIAKABIJA::IRGC 69074-1::[IRIS 313-11766]	IRIS 313-11766	IRGC 128490	admix	0	A	TSIMIAKABIJA::IRGC 69074-1::[IRIS 313-11766]	IRIS 313-11766	IRGC 128490	admix	81.5	C	T	T	-	-	-	C	C	C	T	C	-	-	-	-	A	A	G	C	T	T	-	A	-	G	G	C	T	C	C	A	C	A	G	A	A	G	-	-
FAN WU::IRGC 70245-1::[IRIS 313-11801]	IRIS 313-11801	IRGC 127368	indx	0	A	FAN WU::IRGC 70245-1::[IRIS 313-11801]	IRIS 313-11801	IRGC 127368	indx	150	C	T	T	-	-	-	C	C	C	T	T	T	A	G	A	A	A	G	C	T	C	C	C	C	G	G	C	T	C	C	A	C	A	G	A	A	G	-	-
PADINTHUMA::IRGC 70762-2::[IRIS 313-11819]	IRIS 313-11819	IRGC 132362	ind3	0	A	PADINTHUMA::IRGC 70762-2::[IRIS 313-11819]	IRIS 313-11819	IRGC 132362	ind3	151	C	T	C	C	C	C	C	C	C	T	C	-	-	-	-	A	A	G	C	T	C	C	C	C	G	G	C	T	C	C	A	C	A	G	A	A	G	-	-
BOO MAE::IRGC 71058-1::[IRIS 313-11833]	IRIS 313-11833	IRGC 132276	ind3	0	A	BOO MAE::IRGC 71058-1::[IRIS 313-11833]	IRIS 313-11833	IRGC 132276	ind3	90	C	T	T	-	-	-	C	C	C	T	C	-	-	-	-	A	A				T	-	C	C	G	G	C	T	C	C	A	C	A	G	A	A	G	-	-
NIAW NAHK KRAD::IRGC 71352-1::[IRIS 313-11840]	IRIS 313-11840	IRGC 132412	ind3	0	A	NIAW NAHK KRAD::IRGC 71352-1::[IRIS 313-11840]	IRIS 313-11840	IRGC 132412	ind3	95	C	T	T	-	-	-	C	C	C	T	C	-	-	-	-	C	-	G	C	T	T	-	C	C	G	G	C	T	C	C			A	G			G	-	-
NIAW NARAI::IRGC 71353-1::[IRIS 313-11841]	IRIS 313-11841	IRGC 127679	ind3	0	A	NIAW NARAI::IRGC 71353-1::[IRIS 313-11841]	IRIS 313-11841	IRGC 127679	ind3	97	C	T	T	-	-	-	C	C	C	T	C	-	-	-	-	C	-						A	-	G	G	C	T	C	C	A	C	A	G	A	A	G	-	-
NIAW YUANG KHANUN::IRGC 71362-1::[IRIS 313-11842]	IRIS 313-11842		ind3	0	A	NIAW YUANG KHANUN::IRGC 71362-1::[IRIS 313-11842]	IRIS 313-11842		ind3	111	C	T	C	C	C	C	C	C	C	T	C	-	-	-	-	C	-	G	C	T	T	-	C	C	G	G	C	T	C	C	A	C	A	G	A	A	G	-	-
PULUT SELEMYAM::IRGC 71820-1::[IRIS 313-11849]	IRIS 313-11849	IRGC 128439	ind3	0	A	PULUT SELEMYAM::IRGC 71820-1::[IRIS 313-11849]	IRIS 313-11849	IRGC 128439	ind3	74											C	-	-	-	-	C	-	G	C	T	T	-	A	-	G	G	C	T		C				G			G	-	-
MA YOO::IRGC 73507-1::[IRIS 313-11898]	IRIS 313-11898	IRGC 127617	ind3	0	A	MA YOO::IRGC 73507-1::[IRIS 313-11898]	IRIS 313-11898	IRGC 127617	ind3	98	C	T	T	-	-	-	C	C	C	T	C	-	-	-	-	C	-	G	C	T	T	-	A	-	G	G	C	T	C	C	A	C	A	G	A	A	G	-	-
BUTNAPAR::IRGC 74734-1::[IRIS 313-11917]	IRIS 313-11917	IRGC 127241	aus	0	A	BUTNAPAR::IRGC 74734-1::[IRIS 313-11917]	IRIS 313-11917	IRGC 127241	aus	105							C	C	C	T	C	-	-	-	-	C	-	G	C	T	T	-	A	-	G	G	C	T	C	C				G	A	A	G	-	-
SAWK GAM MAH::IRGC 75159-1::[IRIS 313-11925]	IRIS 313-11925	IRGC 132415	ind3	0	A	SAWK GAM MAH::IRGC 75159-1::[IRIS 313-11925]	IRIS 313-11925	IRGC 132415	ind3	59	C	T	T	-	-	-	C	C	C	T	C	-	-	-	-	C	-	G	C	T					G	G	C	T	C	C							G	-	-
GNASSOUMADOUGOU::IRGC 75595-1::[IRIS 313-11938]	IRIS 313-11938	IRGC 131988	indx	0	A	GNASSOUMADOUGOU::IRGC 75595-1::[IRIS 313-11938]	IRIS 313-11938	IRGC 131988	indx	96	C	T	T	-	-	-	C	C	C	T	C	-	-	-	-	A	A	G	C	T	T	-	A	-	G	G	C	T	C	C	A	C	A	G	A	A	G	-	-
MALOBA (DISSI ROUGE)::IRGC 75700-1::[IRIS 313-11940]	IRIS 313-11940	IRGC 127599	indx	0	A	MALOBA (DISSI ROUGE)::IRGC 75700-1::[IRIS 313-11940]	IRIS 313-11940	IRGC 127599	indx	97											C	-	-	-	-	C	-	G	C	T	C	C	C	C	G	G	C	T	C	C	A	C	A	G	A	A	G	-	-
MOUI SAMBA::IRGC 75751-1::[IRIS 313-11941]	IRIS 313-11941	IRGC 128394	ind1B	0	A	MOUI SAMBA::IRGC 75751-1::[IRIS 313-11941]	IRIS 313-11941	IRGC 128394	ind1B	122	C	T	C	C	C	C	C	C	C	T	T	T	A	G	A	A	A	G	C	T	T	-	C	C	G	G	C	T	C	C	A	C	A	G	A	A	G	-	-
KAGIOS PUTI::IRGC 76965-1::[IRIS 313-11959]	IRIS 313-11959	IRGC 135756	ind3	0	A	KAGIOS PUTI::IRGC 76965-1::[IRIS 313-11959]	IRIS 313-11959	IRGC 135756	ind3	110.5	C	T	C	C	C	C	C	C	C	T	T	T	A	G	A	A	A	G	C	T	T	-	A	-	G	G	C	T	C	C	A	C	A	G	A	A	G	-	-
IN TOK::IRGC 77071-1::[IRIS 313-11961]	IRIS 313-11961	IRGC 127432	ind3	0	A	IN TOK::IRGC 77071-1::[IRIS 313-11961]	IRIS 313-11961	IRGC 127432	ind3	68.5	C	T	T	-	-	-	C	C	C	T	T	T	A	G	A	C	-	G	C	T	T	-	A	-	G	G	C	T	C	C				G	A	A	G	-	-
IR 5657-33-2::IRGC 77992-1::[IRIS 313-11978]	IRIS 313-11978	IRGC 127440	ind1B	0	A	IR 5657-33-2::IRGC 77992-1::[IRIS 313-11978]	IRIS 313-11978	IRGC 127440	ind1B	90	C	T	T	-	-	-	C	C	C	T	C	-	-	-	-	C	-	G	C	T	T	-	A	-	G	G	C	T	C	C				G			G	-	-
IR 19661-364-1-2-3::IRGC 78061-1::[IRIS 313-11979]	IRIS 313-11979	IRGC 127435	ind1B	0	A	IR 19661-364-1-2-3::IRGC 78061-1::[IRIS 313-11979]	IRIS 313-11979	IRGC 127435	ind1B	107	C	T	C	C	C	C	C	C	C	T	T	T	A	G	A	C	-	G	C	T	T	-	C	C	G	G	C	T	C	C	A	C		G	A	A	G	-	-
IR 10120-7-2-1-4::IRGC 78628-1::[IRIS 313-11987]	IRIS 313-11987	IRGC 127433	indx	0	A	IR 10120-7-2-1-4::IRGC 78628-1::[IRIS 313-11987]	IRIS 313-11987	IRGC 127433	indx	80	C	T	T	-	-	-	C	C	C	T	C	-	-	-	-	C	-	G	C	T	T	-	A	-	G	G	C	T	C	C	A	C	A	G	A	A	G	-	-
POTOQOIN::IRGC 78677-1::[IRIS 313-11988]	IRIS 313-11988	IRGC 132033	indx	0	A	POTOQOIN::IRGC 78677-1::[IRIS 313-11988]	IRIS 313-11988	IRGC 132033	indx	85	C	T	C	C	C	C	C	C	C	T						A	A	G	C	T	T	-			G	G	C	T	C	C	A	C	A	G	A	A	G	-	-
TAMBAS JANGKOK::IRGC 78724-1::[IRIS 313-11989]	IRIS 313-11989	IRGC 132416	ind3	0	A	TAMBAS JANGKOK::IRGC 78724-1::[IRIS 313-11989]	IRIS 313-11989	IRGC 132416	ind3	86	C	T	T	-	-	-	C	C	C	T	T	T	A	G	A	C	-	G	C	T	C	C	A	-	G	G	C	T	C	C	A	C	A	G	A	A	G	-	-
TAISEN GLUTINOUS YU 1157::IRGC 78750-1::[IRIS 313-11990]	IRIS 313-11990	IRGC 127839	ind1B	0	A	TAISEN GLUTINOUS YU 1157::IRGC 78750-1::[IRIS 313-11990]	IRIS 313-11990	IRGC 127839	ind1B	62																A	A	G	C	T	T	-	A	-	G	G	C	T	C	C	A	C	A	G	A	A	G	-	-
TUI (KIDAYAN)::IRGC 79058-1::[IRIS 313-11996]	IRIS 313-11996	IRGC 127869	ind3	0	A	TUI (KIDAYAN)::IRGC 79058-1::[IRIS 313-11996]	IRIS 313-11996	IRGC 127869	ind3	91	C	T	T	-/C	-/C	-/C	C	C	C	T	T	C/T	A/C	C/G	A	C	-	G	C	T	T	-	C	C	G	G	C	T	C	C	A	C	A	G	A	A	G	-	-
LAANG::IRGC 79258-1::[IRIS 313-12000]	IRIS 313-12000	IRGC 135569	ind3	0	A	LAANG::IRGC 79258-1::[IRIS 313-12000]	IRIS 313-12000	IRGC 135569	ind3	115	C	T	C	C	C	C	C	C	C	T	C	-	-	-	-	A	A	G	C	T	T	-	A	-	G	G	C	T	C	C	A	C	A	G	A	A	G	-	-
CHE MAH::IRGC 79480-1::[IRIS 313-12005]	IRIS 313-12005	IRGC 132395	ind3	0	A	CHE MAH::IRGC 79480-1::[IRIS 313-12005]	IRIS 313-12005	IRGC 132395	ind3	53	C	T	T	-	-	-	C	C	C	T	C	-	-	-	-	C	-	G	C	T	T	-	A	-	G	G	C	T		C				G			G	-	-
YU TOU ZHONG::IRGC 79749-1::[IRIS 313-12011]	IRIS 313-12011	IRGC 128510	indx	0	A	YU TOU ZHONG::IRGC 79749-1::[IRIS 313-12011]	IRIS 313-12011	IRGC 128510	indx	51	C	T	T	-	-	-	C	C	C	T	C	-	-	-	-	C	-						A	-	G	G	C	T	C	C							G	-	-
ADANKARU::IRGC 79842-1::[IRIS 313-12014]	IRIS 313-12014	IRGC 127105	ind2	0	A	ADANKARU::IRGC 79842-1::[IRIS 313-12014]	IRIS 313-12014	IRGC 127105	ind2	76											C	-	-	-	-	C	-	G	C	T	T	-	A	-	G	G	C	T		C					A	A	G	-	-
DOGON IRI::IRGC 79882-1::[IRIS 313-12015]	IRIS 313-12015	IRGC 127333	ind2	0	A	DOGON IRI::IRGC 79882-1::[IRIS 313-12015]	IRIS 313-12015	IRGC 127333	ind2	109	C	T	C	C	C	C	C	C	C	T	T	T	A	G	A	C	-	G	C	T	T	-	A	-	G	G	C	T	C	C	A	C	A	G	A	A	G	-	-
CHAO BONG::IRGC 80266-2::[IRIS 313-12028]	IRIS 313-12028	IRGC 132328	indx	0	A	CHAO BONG::IRGC 80266-2::[IRIS 313-12028]	IRIS 313-12028	IRGC 132328	indx	94	C	T	T	-	-	-	C	C	C	T	C	-	-	-	-	A	A	G	C	T	T	-	A	-	G	G	C	T	C	C	A	C	A	G			G	-	-
KHMAO KDET::IRGC 81278-1::[IRIS 313-12037]	IRIS 313-12037	IRGC 132404	ind3	0	A	KHMAO KDET::IRGC 81278-1::[IRIS 313-12037]	IRIS 313-12037	IRGC 132404	ind3	79	C	T	T	-	-	-	C	C	C	T	C	-	-	-	-	C	-	G	C	T	T	-	A	-	G	G	C	T	C	C	A	C		G			G	-	-
NEANG LAU::IRGC 81328-1::[IRIS 313-12040]	IRIS 313-12040	IRGC 132285	ind3	0	A	NEANG LAU::IRGC 81328-1::[IRIS 313-12040]	IRIS 313-12040	IRGC 132285	ind3	102	C	T	C	C	C	C	C	C	C	T	T	T	A	G	A	A	A	G	C	T	T	-	C	C	G	G	C	T	C	C	A	C	A	G	A	A	G	-	-
PHCAR KABAS::IRGC 81357-1::[IRIS 313-12042]	IRIS 313-12042	IRGC 132031	ind3	0	A	PHCAR KABAS::IRGC 81357-1::[IRIS 313-12042]	IRIS 313-12042	IRGC 132031	ind3	57											C	-	-	-	-	C	-	G	C	T	T	-	A	-	G	G	C	T		C	A	C		G	A	A	G	-	-
SAR SIEM::IRGC 81386-2::[IRIS 313-12044]	IRIS 313-12044	IRGC 135641	ind3	0	A	SAR SIEM::IRGC 81386-2::[IRIS 313-12044]	IRIS 313-12044	IRGC 135641	ind3	116	C	T	C	C	C	C	C	C	C	T	T	T	A	G	A	C	-	G	C	T	T	-	C	C	G	G	C	T	C	C	A	C	A	G	A	A	G	-	-
KYAIN WAR ME DONE::IRGC 82819-1::[IRIS 313-12074]	IRIS 313-12074	IRGC 132283	aro	0	A	KYAIN WAR ME DONE::IRGC 82819-1::[IRIS 313-12074]	IRIS 313-12074	IRGC 132283	aro	86.5	C	T	T	-	-	-	C	C	C	T	C	-	-	-	-	C	-	G	C	T	T	-	C	C	G	G	C	T	C	C	A	C	A	G	A	A	G	-	-
KASHMIRI::IRGC 83002-1::[IRIS 313-12079]	IRIS 313-12079		ind3	0	A	KASHMIRI::IRGC 83002-1::[IRIS 313-12079]	IRIS 313-12079		ind3	115	C	T	C	C	C	C	C	C	C	T	T	T	A	G	A	C	-	G	C	T	T	-	C	C	G	G	C	T	C	C	A	C	A	G	A	A	G	-	-
KA GIL::IRGC 83029-1::[IRIS 313-12080]	IRIS 313-12080	IRGC 127475	ind3	0	A	KA GIL::IRGC 83029-1::[IRIS 313-12080]	IRIS 313-12080	IRGC 127475	ind3	66											C	-	-	-	-	C	-	G	C	T	T	-	A	-	G	G	C	T	C	C				G			G	-	-
HMA GNENG::IRGC 85751-1::[IRIS 313-12128]	IRIS 313-12128	IRGC 127408	ind3	0	A	HMA GNENG::IRGC 85751-1::[IRIS 313-12128]	IRIS 313-12128	IRGC 127408	ind3	75.5	C	T	T	-	-	-	C	C	C	T	C	-	-	-	-	A	A	G	C	T					G	G	C	T	C	C				G			G	-	-
ATT CHHMOUS::IRGC 87030-1::[IRIS 313-12142]	IRIS 313-12142	IRGC 127177	ind3	0	A	ATT CHHMOUS::IRGC 87030-1::[IRIS 313-12142]	IRIS 313-12142	IRGC 127177	ind3	75	C	T	T	-	-	-	C	C	C	T	C	-	-	-	-	C	-	G	C	T	T	-	C	C	G	G	C	T	C	C	A	C	A	G	A	A	G	-	-
ARNG'-KAR PHAR ONG::IRGC 87196-1::[IRIS 313-12147]	IRIS 313-12147	IRGC 127171	ind3	0	A	ARNG'-KAR PHAR ONG::IRGC 87196-1::[IRIS 313-12147]	IRIS 313-12147	IRGC 127171	ind3	69	C	T	C	C	C	C	C	C	C	T	C	-	-	-	-	C	-	G	C	T	T	-	A	-	G	G	C	T		C							G	-	-
NYAULI::IRGC 88628-1::[IRIS 313-12182]	IRIS 313-12182	IRGC 127686	indx	0	A	NYAULI::IRGC 88628-1::[IRIS 313-12182]	IRIS 313-12182	IRGC 127686	indx	80																									G	G	C	T	C	C	A	C	A	G	A	A	G	-	-
SETYA::IRGC 88654-1::[IRIS 313-12183]	IRIS 313-12183	IRGC 127796	aus	0	A	SETYA::IRGC 88654-1::[IRIS 313-12183]	IRIS 313-12183	IRGC 127796	aus	114	C	T	T	-	-	-	C	C	C	T	C	-	-	-	-	C	-	G	C	T	T	-	A	-	G	G	C	T	C	C	A	C	A	G	A	A	G	-	-
DO NOUAN::IRGC 89648-1::[IRIS 313-12193]	IRIS 313-12193	IRGC 127341	ind3	0	A	DO NOUAN::IRGC 89648-1::[IRIS 313-12193]	IRIS 313-12193	IRGC 127341	ind3	79	C	T	T	-	-	-	C	C	C	T	C	-	-	-	-	C	-	G	C	T	T	-	A	-	G	G	C	T	C	C	A	C	A	G	A	A	G	-	-
NOON SOUNG::IRGC 91956-1::[IRIS 313-12224]	IRIS 313-12224	IRGC 127681	ind3	0	A	NOON SOUNG::IRGC 91956-1::[IRIS 313-12224]	IRIS 313-12224	IRGC 127681	ind3	65	C	T	T	-	-	-	C	C	C	T	C	-	-	-	-	A	A	G	C	T	T	-	A	-	G	G	C	T	C	C				G	A	A	G	-	-
TAM::IRGC 92253-1::[IRIS 313-12229]	IRIS 313-12229	IRGC 127843	ind3	0	A	TAM::IRGC 92253-1::[IRIS 313-12229]	IRIS 313-12229	IRGC 127843	ind3	72	C	T	T	-	-	-	C	C	C	T	C	-	-	-	-	C	-	G	C	T	T	-							C	C				G			G	-	-
TE SAN AI 2::IRGC 93355-1::[IRIS 313-12232]	IRIS 313-12232	IRGC 127852	indx	0	A	TE SAN AI 2::IRGC 93355-1::[IRIS 313-12232]	IRIS 313-12232	IRGC 127852	indx	113.5	C	T	T	-	-	-	C	C	C	T	C	-	-	-	-	C	-	G	C	T	T	-	C	C	G	G	C	T	C	C	A	C	A	G	A	A	G	-	-
ANLINGWUBAILI::IRGC 93363-1::[IRIS 313-12234]	IRIS 313-12234	IRGC 127124	ind1B	0	A	ANLINGWUBAILI::IRGC 93363-1::[IRIS 313-12234]	IRIS 313-12234	IRGC 127124	ind1B	123	C	T	T	-	-	-	C	C	C	T	C	-	-	-	-	C	-	G	C	T	C	C	C	C	G	G	C	T	C	C	A	C	A	G	A	A	G	-	-
PULUT MINYAK::IRGC 93615-1::[IRIS 313-12240]	IRIS 313-12240	IRGC 132294	ind3	0	A	PULUT MINYAK::IRGC 93615-1::[IRIS 313-12240]	IRIS 313-12240	IRGC 132294	ind3	74	C	T	T	-	-	-	C	C	C	T	C	-	-	-	-	C	-	G	C	T	T	-	A	-	G	G	C	T	C	C	A	C	A	G	A	A	G	-	-
DAMNOUEB PHDAU PEN::IRGC 94176-1::[IRIS 313-12249]	IRIS 313-12249	IRGC 128271	ind3	0	A	DAMNOUEB PHDAU PEN::IRGC 94176-1::[IRIS 313-12249]	IRIS 313-12249	IRGC 128271	ind3	83.5	C	T	T	-	-	-	C	C	C	T	C	-	-	-	-	A	A	G	C	T	T	-	A	-	G	G	C	T	C	C	A	C	A	G	A	A	G	-	-
RUS RUSSEI::IRGC 94341-1::[IRIS 313-12251]	IRIS 313-12251	IRGC 127772	ind3	0	A	RUS RUSSEI::IRGC 94341-1::[IRIS 313-12251]	IRIS 313-12251	IRGC 127772	ind3	78	C	T	T	-	-	-	C	C	C	T	C	-/T	-/A	-/G	-/A	A	A/T	G	C	T	T	-/T	A	-/T	G	G	C	T	C	C				G	G/A	G/A	G	-/T	-/A
KHIE TOM::IRGC 95601-1::[IRIS 313-12263]	IRIS 313-12263	IRGC 127521	ind3	0	A	KHIE TOM::IRGC 95601-1::[IRIS 313-12263]	IRIS 313-12263	IRGC 127521	ind3	85.5											C	-	-	-	-	C	-	G	C	T	T	-	A	-	G	G	C	T	C	C	A	C	A	G	A	A	G	-	-
MAYATAUNG::IRGC 95957-1::[IRIS 313-12268]	IRIS 313-12268	IRGC 127616	indx	0	A	MAYATAUNG::IRGC 95957-1::[IRIS 313-12268]	IRIS 313-12268	IRGC 127616	indx	129	C	T	T	-	-	-	C	C	C	T	C	-	-	-	-	A	A	G	C	T	T	-			G	G	C	T	C	C	A	C	A	G	A	A	G	-	-
KAUK HNYINGWA::IRGC 97487-1::[IRIS 313-12287]	IRIS 313-12287	IRGC 127501	ind3	0	A	KAUK HNYINGWA::IRGC 97487-1::[IRIS 313-12287]	IRIS 313-12287	IRGC 127501	ind3	98.5	C	T					C	C	C	T	C	-	-	-	-	C	-						A	-	G	G	C	T	C	C	A	C	A	G	A	A	G	-	-
NGA CHEKH FAT::IRGC 97701-2::[IRIS 313-12291]	IRIS 313-12291	IRGC 132358	indx	0	A	NGA CHEKH FAT::IRGC 97701-2::[IRIS 313-12291]	IRIS 313-12291	IRGC 132358	indx	106	C	T	T	-	-	-	C	C	C	T	C	-	-	-	-	A	A	G	C	T	T	-	A	-	G	G	C	T			A	C	A	G	A	A	G	-	-
SAM SI::IRGC 99020-1::[IRIS 313-12308]	IRIS 313-12308	IRGC 127782	ind3	0	A	SAM SI::IRGC 99020-1::[IRIS 313-12308]	IRIS 313-12308	IRGC 127782	ind3	113											C	-	-	-	-	C	-	G	C	T	T	-	A	-	G	G	C	T	C	C	A	C	A	G	A	A	G	-	-
DISSI::IRGC 101346-1::[IRIS 313-12325]	IRIS 313-12325	IRGC 127321	ind2	0	A	DISSI::IRGC 101346-1::[IRIS 313-12325]	IRIS 313-12325	IRGC 127321	ind2	77	C	T	C	C	C	C	C	C	C	T	C	-	-	-	-			G	C	T	T	-	A	-	G	G	C	T	C	C	A	C	A	G	A	A	G	-	-
DO KHAW::IRGC 106977-1::[IRIS 313-12334]	IRIS 313-12334	IRGC 127334	ind3	0	A	DO KHAW::IRGC 106977-1::[IRIS 313-12334]	IRIS 313-12334	IRGC 127334	ind3	101	C	T	T	-	-	-	C	C	C	T	C	-	-	-	-	C	-	G	C	T	T	-	A	-	G	G	C	T	C	C	A	C	A	G	A	A	G	-	-
NASAENG::IRGC 107818-1::[IRIS 313-12354]	IRIS 313-12354	IRGC 127649	indx	0	A	NASAENG::IRGC 107818-1::[IRIS 313-12354]	IRIS 313-12354	IRGC 127649	indx	77	C	T	T	-	-	-	C	C	C	T	C	-	-	-	-	A	A	G	C	T	T	-	A	-	G	G	C	T	C	C	A	C	A	G	A	A	G	-	-
NASAENG::IRGC 107819-1::[IRIS 313-12355]	IRIS 313-12355	IRGC 127650	indx	0	A	NASAENG::IRGC 107819-1::[IRIS 313-12355]	IRIS 313-12355	IRGC 127650	indx	98.5	C	T	C	C	C	C	C	C	C	T	T	T	A	G	A	A	A	G	C	T	T	-	A	-	G	G	C	T	C	C	A	C	A	G	A	A	G	-	-
IAC 165::IRGC 82775-2::[IRIS 313-15903]	IRIS 313-15903		indx	0	A	IAC 165::IRGC 82775-2::[IRIS 313-15903]	IRIS 313-15903		indx	59	C	T	T	-	-	-	C	C	C	T	C	-	-	-	-	C	-	G	C	T	T	-	A	-	G	G	C	T	C	C	A	C	A	G	A	A	G	-	-
IET 14720::IRTP 23179-G1::[IRIS 313-15909]	IRIS 313-15909	IRGC 126958	aro	0	A	IET 14720::IRTP 23179-G1::[IRIS 313-15909]	IRIS 313-15909	IRGC 126958	aro	75											C	-	-	-	-	C	-						A	-	G	G	C	T	C	C				G			G	-	-
ANGIFOTSY 685::GERVEX 4717-C1::[IRIS 313-7638]	IRIS 313-7638	IRGC 121963	indx	0	A	ANGIFOTSY 685::GERVEX 4717-C1::[IRIS 313-7638]	IRIS 313-7638	IRGC 121963	indx	91	C	T	T	-	-	-	C	C	C	T	T	T	A	G	A	A	A	G	C	T	T	-	C	C	G	G	C	T	C	C	A	C	A	G	A	A	G	-	-
CT 6510-24-1-2::C1::[IRIS 313-7665]	IRIS 313-7665	IRGC 122025	indx	0	A	CT 6510-24-1-2::C1::[IRIS 313-7665]	IRIS 313-7665	IRGC 122025	indx	67	C	T	T	-	-	-	C	C	C	T	T	T	A	G	A	A	A	G	C	T	T	-	A	-	G	G	C	T	C	C	A	C	A	G	A	A	G	-	-
IR 55411-50::IRTP 16682-C1::[IRIS 313-7696]	IRIS 313-7696	IRGC 124394	indx	0	A	IR 55411-50::IRTP 16682-C1::[IRIS 313-7696]	IRIS 313-7696	IRGC 124394	indx	75	C	T	C	C	C	C	C	C	C	T	T	T	A	G	A	A	A	G	C	T	T	-			G	G	C	T	C	C	A	C	A	G	A	A	G	-	-
UPL RI 7::IRTP 9897-C1::[IRIS 313-7797]	IRIS 313-7797	IRGC 122272	indx	0	A	UPL RI 7::IRTP 9897-C1::[IRIS 313-7797]	IRIS 313-7797	IRGC 122272	indx	99	C	T	C	C	C	C	C	C	C	T	T	T	A	G	A	C	-	G	C	T	T	-	A	-	G	G	C	T	C	C				G	A	A	G	-	-
WAS 173-B-B-6-2-2::C1::[IRIS 313-7808]	IRIS 313-7808	IRGC 122285	ind1B	0	A	WAS 173-B-B-6-2-2::C1::[IRIS 313-7808]	IRIS 313-7808	IRGC 122285	ind1B	147	C	T	C	C	C	C	C	C	C	T	T	T	A	G	A	A	A	G	C	T	C	C	C	C	G	G	C	T	C	C	A	C	A	G	A	A	G	-	-
IRAT 335::C1::[IRIS 313-7924]	IRIS 313-7924	IRGC 122120	trop	0	A	IRAT 335::C1::[IRIS 313-7924]	IRIS 313-7924	IRGC 122120	trop	100	C	T	T	-	-	-	C	C	C	T	C	-	-	-	-	A	A	G	C	T	T	-	C	C	G	G	C	T	C	C	A	C	A	G	A	A	G	-	-
ARIANA::GERVEX 396-C1::[IRIS 313-8069]	IRIS 313-8069	IRGC 121966	indx	0	A	ARIANA::GERVEX 396-C1::[IRIS 313-8069]	IRIS 313-8069	IRGC 121966	indx	92	C	T	T	-	-	-	C	C	C	T	C	-	-	-	-	A	A	G	C	T			A	-	G	G	C	T	C	C	A	C	A	G	A	A	G	-	-
FRAGANCE::GERVEX 1651-C1::[IRIS 313-8184]	IRIS 313-8184	IRGC 122050	admix	0	A	FRAGANCE::GERVEX 1651-C1::[IRIS 313-8184]	IRIS 313-8184	IRGC 122050	admix	78	C	T	T	-	-	-	C	C	C	T	C	-	-	-	-	C	-	G	C	T	T	-	A	-	G	G	C	T	C	C	A	C	A	G	A	A	G	-	-
KHAO DAWK MALI 105::IRGC 27748-2::[IRIS 313-8253]	IRIS 313-8253	IRGC 121235	ind3	0	A	KHAO DAWK MALI 105::IRGC 27748-2::[IRIS 313-8253]	IRIS 313-8253	IRGC 121235	ind3	45.5	C	T	T	-	-	-	C	C	C	T	C	-	-	-	-	C	-	G	C	T	T	-			G	G	C	T		C				G	A	A	G	-	-
PULUTHI KARAN (MIXED)::IRGC 77530-1::[IRIS 313-8306]	IRIS 313-8306		indx	0	A	PULUTHI KARAN (MIXED)::IRGC 77530-1::[IRIS 313-8306]	IRIS 313-8306		indx	90.5	C	T	T	-	-	-	C	C	C	T	C	-	-	-	-	C	-								G	G	C	T	C	C	A	C	A	G	A	A	G	-	-
ARC 15091::IRGC 43048-1::[IRIS 313-8332]	IRIS 313-8332	IRGC 126298	indx	0	A	ARC 15091::IRGC 43048-1::[IRIS 313-8332]	IRIS 313-8332	IRGC 126298	indx	116.5	C	T	C	C	C	C	C	C	C	T	C	-	-	-	-	C	-	G	C	T			A	-	G	G	C	T	C	C	A	C	A	G	A	A	G	-	-
MENTIK TJERE BELUT::IRGC 18254-1::[IRIS 313-8368]	IRIS 313-8368	IRGC 126071	indx	0	A	MENTIK TJERE BELUT::IRGC 18254-1::[IRIS 313-8368]	IRIS 313-8368	IRGC 126071	indx	92	C	T	C	C	C	C	C	C	C	T	C	-	-	-	-	C	-	G	C	T	T	-	A	-	G	G	C	T	C	C	A	C	A	G	A	A	G	-	-
ARC 13252::IRGC 22604-1::[IRIS 313-8382]	IRIS 313-8382		admix	0	A	ARC 13252::IRGC 22604-1::[IRIS 313-8382]	IRIS 313-8382		admix	61	C	T	T	-	-	-	C	C	C	T	C	-	-	-	-	A	A	G	C	T			A	-	G	G	C	T	C	C	A	C	A	G	A	A	G	-	-
MARAGBE::IRGC 69263-1::[IRIS 313-8391]	IRIS 313-8391		ind2	0	A	MARAGBE::IRGC 69263-1::[IRIS 313-8391]	IRIS 313-8391		ind2	135	C	T	C	C	C	C	C	C	C	T	T	T	A	G	A	A	A	G	C	T	C	C	A	-	G	G	C	T	C	C	A	C	A	G	A	A	G	-	-
JABOR SAIL::IRGC 66831-1::[IRIS 313-8410]	IRIS 313-8410	IRGC 121618	aus	0	A	JABOR SAIL::IRGC 66831-1::[IRIS 313-8410]	IRIS 313-8410	IRGC 121618	aus	72	C	T	T	-	-	-	C	C	C	T	C	-	-	-	-	C	-	G	C	T	T	-	A	-	G	G	C	T	C	C				G	A	A	G	-	-
ARC 18175::IRGC 42316-1::[IRIS 313-8458]	IRIS 313-8458	IRGC 131928	indx	0	A	ARC 18175::IRGC 42316-1::[IRIS 313-8458]	IRIS 313-8458	IRGC 131928	indx	77	C	T	T	-	-	-	C	C	C	T	C	-	-	-	-	C	-	G	C	T	T	-	A	-	G	G	C	T		C			A	G	A	A	G	-	-
PAH WEAN::IRGC 78276-1::[IRIS 313-8474]	IRIS 313-8474	IRGC 126258	ind3	0	A	PAH WEAN::IRGC 78276-1::[IRIS 313-8474]	IRIS 313-8474	IRGC 126258	ind3	43																C	-	G	C	T	T	-			G	G	C	T		C				G			G	-	-
MELABOH::IRGC 66597-1::[IRIS 313-8493]	IRIS 313-8493	IRGC 128537	ind3	0	A	MELABOH::IRGC 66597-1::[IRIS 313-8493]	IRIS 313-8493	IRGC 128537	ind3	141	C	T	T	-/C	-/C	-/C	C	C	C	T	C	-/T	-/A	-/G	-/A	A	A/T	G	C	T	T	-/T	C	C/T	G	G	C	T	C	C	A	C	A	G	A	A	G	-/T	-/A
DAA MANSA::IRGC 67559-1::[IRIS 313-8514]	IRIS 313-8514	IRGC 126196	ind1B	0	A	DAA MANSA::IRGC 67559-1::[IRIS 313-8514]	IRIS 313-8514	IRGC 126196	ind1B	48																C	-	G	C	T			A	-	G	G	C	T		C	A	C		G	A	A	G	-	-
DHANE BURWA::IRGC 10105-1::[IRIS 313-8530]	IRIS 313-8530	IRGC 126199	ind2	0	A	DHANE BURWA::IRGC 10105-1::[IRIS 313-8530]	IRIS 313-8530	IRGC 126199	ind2	108	C	T	T	-	-	-	C	C	C	T	C	-	-	-	-	A	A	G	C	T	T	-	A	-	G	G	C	T	C	C	A	C	A	G		A	G	-	-
LARHA MUGAD::IRGC 52339-1::[IRIS 313-8568]	IRIS 313-8568	IRGC 125619	ind2	0	A	LARHA MUGAD::IRGC 52339-1::[IRIS 313-8568]	IRIS 313-8568	IRGC 125619	ind2	124	C	T	T	-	-	-	C	C	C	T	C	-	-	-	-	C	-	G	C	T	T	-	A	-	G	G	C	T	C	C	A	C	A	G	A	A	G	-	-
ARC 11901::IRGC 21727-1::[IRIS 313-8585]	IRIS 313-8585	IRGC 127033	indx	0	A	ARC 11901::IRGC 21727-1::[IRIS 313-8585]	IRIS 313-8585	IRGC 127033	indx	100	C	T	T	-	-	-	C	C	C	T	C	-	-	-	-	A	A	G	C	T	T	-	C	C	G	G	C	T	C	C	A	C	A	G	A	A	G	-	-
PLI KHAO::IRGC 64596-1::[IRIS 313-8586]	IRIS 313-8586	IRGC 126081	ind3	0	A	PLI KHAO::IRGC 64596-1::[IRIS 313-8586]	IRIS 313-8586	IRGC 126081	ind3	108	C	T	T	-	-	-	C	C	C	T	C	-	-	-	-	C	-	G	C	T			A	-/C	G	G	C	T	C	C	A	C	A	G	A	A	G	-/C	-
SIAM ER 32::IRGC 13917-1::[IRIS 313-8591]	IRIS 313-8591	IRGC 135543	ind3	0	A	SIAM ER 32::IRGC 13917-1::[IRIS 313-8591]	IRIS 313-8591	IRGC 135543	ind3	66											C	-	-	-	-	C	-	G	C	T			A	-	G	G	C	T	C	C				G		A	G	-	-
IR 5494 (BPH 1)::IRGC 24484-1::[IRIS 313-8616]	IRIS 313-8616	IRGC 131939	ind1B	0	A	IR 5494 (BPH 1)::IRGC 24484-1::[IRIS 313-8616]	IRIS 313-8616	IRGC 131939	ind1B	96	C	T	C	C	C	C	C	C	C	T	C	-	-	-	-	A	A	G	C	T	T	-	C	C	G	G	C	T	C	C	A	C	A	G	A	A	G	-	-
JAO LEUANG::IRGC 65866-1::[IRIS 313-8679]	IRIS 313-8679	IRGC 126216	ind3	0	A	JAO LEUANG::IRGC 65866-1::[IRIS 313-8679]	IRIS 313-8679	IRGC 126216	ind3	45	C	T	T	-	-	-	C	C	C	T	C	-	-	-	-	C	-	G	C	T	T	-	A	-	G	G	C	T	C	C	A	C	A	G	A	A	G	-	-
WP 36::IRGC 55278-1::[IRIS 313-8732]	IRIS 313-8732	IRGC 126092	ind1B	0	A	WP 36::IRGC 55278-1::[IRIS 313-8732]	IRIS 313-8732	IRGC 126092	ind1B	73	C	T	T	-	-	-	C	C	C	T	C	-	-	-	-	C	-	G	C	T	T	-							C	C	A	C	A	G	A	A	G	-	-
DOM ZARD::[IRIS 313-8747]	IRIS 313-8747	IRGC 117466	aro	0	A	DOM ZARD::[IRIS 313-8747]	IRIS 313-8747	IRGC 117466	aro	79	C	T	T	-	-	-	C	C	C	T	C	-	-	-	-	C	-	G	C	T			A	-	G	G	C	T	C	C	A	C	A	G	A	A	G	-	-
SIDIK::IRGC 66643-1::[IRIS 313-8767]	IRIS 313-8767		ind3	0	A	SIDIK::IRGC 66643-1::[IRIS 313-8767]	IRIS 313-8767		ind3	63	C	T	T	-	-	-	C	C	C	T	C	-	-	-	-	C	-	G	C	T	T	-	A	-	G	G	C	T	C	C	A	C	A	G	A	A	G	-	-
ARANG::[IRIS 313-8791]	IRIS 313-8791	IRGC 117423	ind3	0	A	ARANG::[IRIS 313-8791]	IRIS 313-8791	IRGC 117423	ind3	62	C	T	T	-	-	-	C	C	C	T	C	-	-	-	-	C	-	G	C	T	T	-	A	-	G	G	C	T	C	C	A	C	A	G	A	A	G	-	-
STRAW 23-400::IRGC 38390-1::[IRIS 313-8822]	IRIS 313-8822		aus	0	A	STRAW 23-400::IRGC 38390-1::[IRIS 313-8822]	IRIS 313-8822		aus	59.5	C	T	T	-	-	-	C	C	C	T	C	-	-	-	-	C	-	G	C	T	T	-	A	-	G	G	C	T	C	C	A	C	A	G	A	A	G	-	-
NOROI::IRGC 31611-1::[IRIS 313-8864]	IRIS 313-8864	IRGC 121069	aus	0	A	NOROI::IRGC 31611-1::[IRIS 313-8864]	IRIS 313-8864	IRGC 121069	aus	131.5	C	T	C	C	C	C	C	C	C	T	T	T	A	G	A	A	A	G	C	T	C	C			G	G	C	T	C	C	A	C	A	G	A	A	G	-	-
AGAI 1::IRGC 24532-1::[IRIS 313-8922]	IRIS 313-8922		ind2	0	A	AGAI 1::IRGC 24532-1::[IRIS 313-8922]	IRIS 313-8922		ind2	93	C	T	C	C	C	C	C	C	C	T	C	-	-	-	-	C	-	G	C	T	T	-	A	-	G	G	C	T	C	C	A	C	A	G	A	A	G	-	-
MUKKALA BAZAL::IRGC 77279-1::[IRIS 313-8930]	IRIS 313-8930	IRGC 125844	ind1B	0	A	MUKKALA BAZAL::IRGC 77279-1::[IRIS 313-8930]	IRIS 313-8930	IRGC 125844	ind1B	117	C	T	C	C	C	C	C	C	C	T	C	-	-	-	-	A	A	G	C	T	T	-/C	A	-/C	G	G	C	T	C	C	A	C	A	G	A	A	G	-/C	-
BUCAYAB::IRGC 44357-1::[IRIS 313-8948]	IRIS 313-8948	IRGC 126974	ind3	0	A	BUCAYAB::IRGC 44357-1::[IRIS 313-8948]	IRIS 313-8948	IRGC 126974	ind3	133	C	T	C	C	C	C	C	C	C	T	T	T	A	G	A	A	A	G	C	T	T	-	A	-	G	G	C	T	C	C	A	C	A	G	A	A	G	-	-
KHAO' HAWM::IRGC 78257-1::[IRIS 313-8985]	IRIS 313-8985	IRGC 126153	ind3	0	A	KHAO' HAWM::IRGC 78257-1::[IRIS 313-8985]	IRIS 313-8985	IRGC 126153	ind3	89	C	T	T	-	-	-	C	C	C	T	C	-	-	-	-	A	A						C	C	G	G	C	T	C	C	A	C	A	G	A	A	G	-	-
SERIBU::IRGC 71615-1::[IRIS 313-8987]	IRIS 313-8987		indx	0	A	SERIBU::IRGC 71615-1::[IRIS 313-8987]	IRIS 313-8987		indx	56.5	C	T	T	-	-	-	C	C	C	T	C	-	-	-	-	A	A	G	C	T	T	-			G	G	C	T	C	C	A	C	A	G	A	A	G	-	-
LONG KHI KRAI::IRGC 64490-1::[IRIS 313-9006]	IRIS 313-9006	IRGC 126985	ind3	0	A	LONG KHI KRAI::IRGC 64490-1::[IRIS 313-9006]	IRIS 313-9006	IRGC 126985	ind3	93	C	T	T	-	-	-	C	C	C	T	C	-	-	-	-	C	-	G	C	T	C	C	C	C	G	G	C	T	C	C	A	C	A	G	A	A	G	-	-
KHAO GRADOOK CHAHNG::IRGC 17111-1::[IRIS 313-9032]	IRIS 313-9032	IRGC 125800	ind1B	0	A	KHAO GRADOOK CHAHNG::IRGC 17111-1::[IRIS 313-9032]	IRIS 313-9032	IRGC 125800	ind1B	75	C	T	T	-	-	-	C	C	C	T	C	-	-	-	-	C	-	G	C	T	T	-	C	C	G	G	C	T	C	C				G	A		G	-	-
SI MERIA::IRGC 66659-1::[IRIS 313-9098]	IRIS 313-9098		ind3	0	A	SI MERIA::IRGC 66659-1::[IRIS 313-9098]	IRIS 313-9098		ind3	74	C	T	T	-	-	-	C	C	C	T	C	-	-	-	-	C	-	G	C	T	T	-	C	C	G	G	C	T	C	C	A	C	A	G	A	A	G	-	-
LEUANG YAI 344::IRGC 651-1::[IRIS 313-9112]	IRIS 313-9112	IRGC 125826	ind3	0	A	LEUANG YAI 344::IRGC 651-1::[IRIS 313-9112]	IRIS 313-9112	IRGC 125826	ind3	109.5	C	T	C	C	C	C	C	C	C	T	T	T	A	G	A	A	A	G	C	T	T	-	C	C	G	G	C	T	C	C	A	C	A	G	A	A	G	-	-
LEUANG YAI 29-12-2::IRGC 881-1::[IRIS 313-9115]	IRIS 313-9115	IRGC 126157	ind3	0	A	LEUANG YAI 29-12-2::IRGC 881-1::[IRIS 313-9115]	IRIS 313-9115	IRGC 126157	ind3	49.5	C	T					C	C	C	T	C	-	-	-	-	C	-	G	C	T	C	C	A	-						C	A	C	A	G	A	A	G	-	-
LEUANG YAI 2 B 72::IRGC 882-1::[IRIS 313-9116]	IRIS 313-9116	IRGC 126138	ind3	0	A	LEUANG YAI 2 B 72::IRGC 882-1::[IRIS 313-9116]	IRIS 313-9116	IRGC 126138	ind3	119.5	C	T	T	-	-	-	C	C	C	T	C	-	-	-	-	A	A	G	C	T	T	-			G	G	C	T	C	C	A	C	A	G	A	A	G	-	-
THIERNO BANDE::IRGC 16009-1::[IRIS 313-9160]	IRIS 313-9160	IRGC 125922	ind3	0	A	THIERNO BANDE::IRGC 16009-1::[IRIS 313-9160]	IRIS 313-9160	IRGC 125922	ind3	137	C	T	T	-/C	-/C	-/C	C	C	C	T	C	-/C	-/C	-/C	-	A	A	G	C	T	T	-	A	-/C	G	G	C	T	C	C	A	C	A	G	A	A	G	-/C	-
XI GAN JING REN::IRGC 60035-1::[IRIS 313-9184]	IRIS 313-9184	IRGC 126014	indx	0	A	XI GAN JING REN::IRGC 60035-1::[IRIS 313-9184]	IRIS 313-9184	IRGC 126014	indx	85	C	T	C	C	C	C	C	C	C	T	T	T	A	G	A	C	-	G	C	T			A	-	G	G	C	T	C	C	A	C	A	G	A	A	G	-	-
WP 65::IRGC 36526-1::[IRIS 313-9227]	IRIS 313-9227	IRGC 126013	ind1B	0	A	WP 65::IRGC 36526-1::[IRIS 313-9227]	IRIS 313-9227	IRGC 126013	ind1B	87	C	T	T	-	-	-	C	C	C	T	C	-	-	-	-	C	-	G	C	T			A	-	G	G	C	T	C	C	A	C	A	G	A	A	G	-	-
JANDA LAOR::IRGC 48552-1::[IRIS 313-9251]	IRIS 313-9251	IRGC 126980	ind3	0	A	JANDA LAOR::IRGC 48552-1::[IRIS 313-9251]	IRIS 313-9251	IRGC 126980	ind3	65	C	T	T	-	-	-	C	C	C	T	C	-	-	-	-	C	-	G	C	T	T	-	A	-	G	G	C	T	C	C				G			G	-	-
LEUANG TAWNG SOOK::IRGC 24394-1::[IRIS 313-9286]	IRIS 313-9286	IRGC 126137	ind3	0	A	LEUANG TAWNG SOOK::IRGC 24394-1::[IRIS 313-9286]	IRIS 313-9286	IRGC 126137	ind3	74.5	C	T	T	-	-	-	C	C	C	T	C	-	-	-	-	C	-	G	C	T	T	-			G	G	C	T		C	A	C	A	G	A	A	G	-	-
TONG MAH::IRGC 65577-1::[IRIS 313-9288]	IRIS 313-9288		ind3	0	A	TONG MAH::IRGC 65577-1::[IRIS 313-9288]	IRIS 313-9288		ind3	65	C	T	T	-	-	-	C	C	C	T	C	-	-	-	-	A	A	G	C	T	T	-	A	-						C				G	A	A	G	-	-
VEN THAP::IRGC 56138-1::[IRIS 313-9317]	IRIS 313-9317	IRGC 125933	indx	0	A	VEN THAP::IRGC 56138-1::[IRIS 313-9317]	IRIS 313-9317	IRGC 125933	indx	91
BHASAMANIK::IRGC 46954-1::[IRIS 313-9360]	IRIS 313-9360		ind2	0	A	BHASAMANIK::IRGC 46954-1::[IRIS 313-9360]	IRIS 313-9360		ind2	63	C	T	T	-	-	-	C	C	C	T	C	-	-	-	-	C	-	G	C	T			A	-	G	G	C	T		C				G
PAHK NOK GAEW::IRGC 64572-1::[IRIS 313-9415]	IRIS 313-9415		ind3	0	A	PAHK NOK GAEW::IRGC 64572-1::[IRIS 313-9415]	IRIS 313-9415		ind3	81	C	T	T	-	-	-	C	C	C	T	C	-	-	-	-	A	A	G	C	T	T	-	A	-					C	C				G	A	A	G	-	-
H 6::IRGC 157-1::[IRIS 313-9472]	IRIS 313-9472	IRGC 125756	indx	0	A	H 6::IRGC 157-1::[IRIS 313-9472]	IRIS 313-9472	IRGC 125756	indx	107											C	-	-	-	-	A	A	G	C	T	T	-	A	-	G	G	C	T	C	C	A	C	A	G	A	A	G	-	-
BINUHANGIN::IRGC 67429-1::[IRIS 313-9503]	IRIS 313-9503	IRGC 125683	indx	0	A	BINUHANGIN::IRGC 67429-1::[IRIS 313-9503]	IRIS 313-9503	IRGC 125683	indx	48																C	-	G	C	T	T	-	A	-	G	G	C	T	C	C	A	C	A	G	A	A	G	-	-
CHUA DAU::IRGC 4785-1::[IRIS 313-9555]	IRIS 313-9555	IRGC 120914	indx	0	A	CHUA DAU::IRGC 4785-1::[IRIS 313-9555]	IRIS 313-9555	IRGC 120914	indx	85	C	T	T	-	-	-	C	C	C	T	C	-	-	-	-	C	-	G	C	T	T	-			G	G	C	T	C	C			A	G	A	A	G	-	-
MULLIKURUVA::IRGC 77529-1::[IRIS 313-9557]	IRIS 313-9557	IRGC 125845	ind2	0	A	MULLIKURUVA::IRGC 77529-1::[IRIS 313-9557]	IRIS 313-9557	IRGC 125845	ind2	94	C	T	T	-	-	-	C	C	C	T	C	-	-	-	-	C	-	G	C	T	T	-	A	-	G	G	C	T	C	C	A			G	A		G	-	-
ARC 11857::IRGC 40972-1::[IRIS 313-9560]	IRIS 313-9560	IRGC 125643	indx	0	A	ARC 11857::IRGC 40972-1::[IRIS 313-9560]	IRIS 313-9560	IRGC 125643	indx	71	C	T	T	-	-	-	C	C	C	T	C	-	-	-	-	C	-	G	C	T			A	-	G	G	C	T	C	C	A	C	A	G	A	A	G	-	-
RP 9-4::IRGC 39735-1::[IRIS 313-9566]	IRIS 313-9566	IRGC 126004	ind1B	0	A	RP 9-4::IRGC 39735-1::[IRIS 313-9566]	IRIS 313-9566	IRGC 126004	ind1B	84.5	C	T	C	C	C	C	C	C	C	T	C	-	-	-	-	A	A	G	C	T	T	-	A	-	G	G	C	T	C	C	A	C	A	G	A	A	G	-	-
E LONG MAH::IRGC 47946-1::[IRIS 313-9600]	IRIS 313-9600	IRGC 126133	indx	0	A	E LONG MAH::IRGC 47946-1::[IRIS 313-9600]	IRIS 313-9600	IRGC 126133	indx	76	C	T	T	-	-	-	C	C	C	T	C	-	-	-	-	A	A	G	C	T			A	-	G	G	C	T	C	C							G	-	-
DANGAR::IRGC 76296-1::[IRIS 313-9610]	IRIS 313-9610	IRGC 120927	aus	0	A	DANGAR::IRGC 76296-1::[IRIS 313-9610]	IRIS 313-9610	IRGC 120927	aus	80	C	T	C	C	C	C	C	C	C	T	T	T	A	G	A	C	-	G	C	T	T	-			G	G	C	T	C	C	A	C	A	G	A	A	G	-	-
KAMPAI PEUN MEUANG::IRGC 78248-1::[IRIS 313-9669]	IRIS 313-9669		ind3	0	A	KAMPAI PEUN MEUANG::IRGC 78248-1::[IRIS 313-9669]	IRIS 313-9669		ind3	81	C	T	T	-	-	-	C	C	C	T	C	-	-	-	-	A	A	G	C	T	T	-	A	-	G	G	C	T	C	C	A	C	A	G	A	A	G	-	-
PA KABAKIE::IRGC 58541-1::[IRIS 313-9687]	IRIS 313-9687		indx	0	A	PA KABAKIE::IRGC 58541-1::[IRIS 313-9687]	IRIS 313-9687		indx	58	C	T	T	-	-	-	C	C	C	T	C	-	-	-	-	C	-	G	C	T	T	-	A	-	G	G	C	T	C	C	A	C	A	G	A	A	G	-	-
UNGGUL::IRGC 71644-1::[IRIS 313-9694]	IRIS 313-9694	IRGC 131951	ind3	0	A	UNGGUL::IRGC 71644-1::[IRIS 313-9694]	IRIS 313-9694	IRGC 131951	ind3	84.5	C	T	T	-	-	-	C	C	C	T	C	-	-	-	-	C	-	G	C	T	T	-	A	-	G	G	C	T	C	C	A	C	A	G	A	A	G	-	-
NAZIRA SAIL::IRGC 77284-1::[IRIS 313-9696]	IRIS 313-9696	IRGC 125850	indx	0	A	NAZIRA SAIL::IRGC 77284-1::[IRIS 313-9696]	IRIS 313-9696	IRGC 125850	indx	60	C	T	T	-	-	-	C	C	C	T	C	-	-	-	-	C	-	G	C	T	T	-	A	-	G	G	C	T		C	A	C	A	G	A	A	G	-	-
NAN TE HAO::IRGC 59797-1::[IRIS 313-9727]	IRIS 313-9727	IRGC 125849	ind1A	0	A	NAN TE HAO::IRGC 59797-1::[IRIS 313-9727]	IRIS 313-9727	IRGC 125849	ind1A	108.5	C	T	T	-	-	-	C	C	C	T	T	T	A	G	A	C	-	G	C	T	T	-	A	-	G	G	C	T	C	C	A	C	A	G	A	A	G	-	-
CI 9445::IRGC 2081-1::[IRIS 313-9767]	IRIS 313-9767	IRGC 125711	indx	0	A	CI 9445::IRGC 2081-1::[IRIS 313-9767]	IRIS 313-9767	IRGC 125711	indx	73	C	T	T	-	-	-	C	C	C	T	T	T	A	G	A	C	-	G	C	T	T	-	C	C	G	G	C	T	C	C				G	A	A	G	-	-
BERENJ 1277 S::IRGC 3461-1::[IRIS 313-9783]	IRIS 313-9783	IRGC 121902	admix	0	A	BERENJ 1277 S::IRGC 3461-1::[IRIS 313-9783]	IRIS 313-9783	IRGC 121902	admix	80	C	T	T	-	-	-	C	C	C	T	T	T	A	G	A	C	-								G	G	C	T	C	C	A	C	A	G	A	A	G	-	-
NALUMOOLAI KARUPAN::IRGC 8993-1::[IRIS 313-9809]	IRIS 313-9809		ind3	0	A	NALUMOOLAI KARUPAN::IRGC 8993-1::[IRIS 313-9809]	IRIS 313-9809		ind3	59.5	C	T	T	-	-	-	C	C	C	T	C	-	-	-	-	C	-	G	C	T	T	-			G	G	C	T		C				G			G	-	-
SML AWINI::IRGC 13391-1::[IRIS 313-9841]	IRIS 313-9841	IRGC 125904	indx	0	A	SML AWINI::IRGC 13391-1::[IRIS 313-9841]	IRIS 313-9841	IRGC 125904	indx	94	C	T	C	C	C	C	C	C	C	T	C	-	-	-	-	C	-	G	C	T	C	C	A	-	G	G	C	T	C	C	A	C	A	G	A	A	G	-	-
KURKARUPPAN::IRGC 15449-1::[IRIS 313-9861]	IRIS 313-9861		aus	0	A	KURKARUPPAN::IRGC 15449-1::[IRIS 313-9861]	IRIS 313-9861		aus	59											C	-	-	-	-	C	-				T	-	A	-					C	C	A	C	A	G		A	G	-	-
SIGARDIS::IRGC 15555-1::[IRIS 313-9867]	IRIS 313-9867	IRGC 126088	ind1B	0	A	SIGARDIS::IRGC 15555-1::[IRIS 313-9867]	IRIS 313-9867	IRGC 126088	ind1B	76	C	T	T	-	-	-	C	C	C	T	C	-	-	-	-	A	A	G	C	T	T	-	C	C	G	G	C	T		C				G	A	A	G	-	-
QUERO ASSAN::IRGC 28860-1::[IRIS 313-9898]	IRIS 313-9898	IRGC 125880	ind3	0	A	QUERO ASSAN::IRGC 28860-1::[IRIS 313-9898]	IRIS 313-9898	IRGC 125880	ind3	68	C	T	T	-	-	-	C	C	C	T	C	-	-	-	-	A	A	G	C	T	T	-	A	-	G	G	C	T		C				G			G	-	-
MEKENZIE SMALL::IRGC 49895-1::[IRIS 313-9935]	IRIS 313-9935	IRGC 126167	ind2	0	A	MEKENZIE SMALL::IRGC 49895-1::[IRIS 313-9935]	IRIS 313-9935	IRGC 126167	ind2	119	C	T	C	C	C	C	C	C	C	T	T	T	A	G	A	C	-	G	C	T	T	-	A	-	G	G	C	T	C	C	A	C	A	G	A	A	G	-	-
BAMOA A 75::IRGC 51101-1::[IRIS 313-9953]	IRIS 313-9953	IRGC 125671	indx	0	A	BAMOA A 75::IRGC 51101-1::[IRIS 313-9953]	IRIS 313-9953	IRGC 125671	indx	126	C	T	C	C	C	C	C	C	C	T	T	T	A	G	A	A	A	G	C	T	T	-	A	-	G	G	C	T	C	C	A	C	A	G	A	A	G	-	-
CICA 9::IRGC 53079-1::[IRIS 313-9966]	IRIS 313-9966	IRGC 125713	ind1B	0	A	CICA 9::IRGC 53079-1::[IRIS 313-9966]	IRIS 313-9966	IRGC 125713	ind1B	115.5	C	T	T	-	-	-	C	C	C	T	C	-	-	-	-	A	A	G	C	T	T	-	A	-	G	G	C	T	C	C	A	C	A	G	A	A	G	-	-
KULA KARUPPAN::IRGC 55328-1::[IRIS 313-9968]	IRIS 313-9968	IRGC 125810	indx	0	A	KULA KARUPPAN::IRGC 55328-1::[IRIS 313-9968]	IRIS 313-9968	IRGC 125810	indx	112	C	T					C	C	C	T						C	-	G	C	T			A	-	G	G	C	T	C	C	A	C	A	G	A	A	G	-	-
ECIA 179-S13::[B194]	B194	IRGC 135886	ind1B	0	A	ECIA 179-S13::[B194]	B194	IRGC 135886	ind1B	56																C	-	G	C	T	T	-	A	-	G	G	C	T	T/C	C	G/A	T/C	G/A	G	G/A	G/A	G	-	-
IR34::[CX275]	CX275		indx	0	A	IR34::[CX275]	CX275		indx	73	C	T	C	C	C	C	C	C	C	T	C	-	-	-	-	C	-	G	C	T	T	-	A	-	G	G	C	T	T/C	C	G/A	T/C	A	G	A	G/A	G	-	-
ARC 12433::IRGC 22064-1::[IRIS 313-10882]	IRIS 313-10882	IRGC 127146	aus	0	A	ARC 12433::IRGC 22064-1::[IRIS 313-10882]	IRIS 313-10882	IRGC 127146	aus	67	C	T	T	-	-	-	C	C	C	T	C	-	-	-	-	C	-	G	C	T	T	-	A	-	G	G	C	T		C							G	-	-
ARC 14756::IRGC 41736-1::[IRIS 313-11272]	IRIS 313-11272	IRGC 127153	aus	0	A	ARC 14756::IRGC 41736-1::[IRIS 313-11272]	IRIS 313-11272	IRGC 127153	aus	97.5	C	T	T	-	-	-	C	C	C	T	C	-	-	-	-	C	-	G	C	T			A	-	G	G	C	T	C	C	G/A	T/C	G/A	G	G/A	G/A	G	-	-
SIMUL KHURI::IRGC 35154-1::[IRIS 313-8771]	IRIS 313-8771	IRGC 121120	aus	0	A	SIMUL KHURI::IRGC 35154-1::[IRIS 313-8771]	IRIS 313-8771	IRGC 121120	aus	45	C	T	T	-	-	-	C	C	C	T	C	-	-	-	-	C	-								G	G	C	T	C	C				G	A		G	-	-
FUNINGZIPIGENGZI::[B067]	B067		ind1A	0	A	FUNINGZIPIGENGZI::[B067]	B067		ind1A	69	C	T	T	-	-	-	C	C	C	T	C	-	-	-	-	C	-	G	C	T	T	-	A	-	G	G	C	T	C	C	A	C	A	G	A	A	G	-	-
80B::[B137]	B137		indx	0		80B::[B137]	B137		indx	54											C	-	-	-	-	C	-						A	-	G	G	C	T	C	C	A	C	A	G			G	-	-
SAWNG RUANG::IRGC 48458-2::[IRIS 313-11393]	IRIS 313-11393	IRGC 132267	ind3	0	A	SAWNG RUANG::IRGC 48458-2::[IRIS 313-11393]	IRIS 313-11393	IRGC 132267	ind3	94.5	C	T	T	-	-	-	C	C	C	T	C	-	-	-	-	C	-	G	C	T	T	-			G	G	C	T	C	C	A	C	A	G	A	A	G	-	-
KHAO NON::IRGC 30051-1::[IRIS 313-11091]	IRIS 313-11091	IRGC 127515	indx	0	A	KHAO NON::IRGC 30051-1::[IRIS 313-11091]	IRIS 313-11091	IRGC 127515	indx	39	C	T	T	-	-	-	C	C	C	T	C	-	-	-	-	C	-	G	C	T	T	-			G	G	C	T		C				G
CHANTEK 145::IRGC 14045-1::[IRIS 313-10700]	IRIS 313-10700		ind3	0	A	CHANTEK 145::IRGC 14045-1::[IRIS 313-10700]	IRIS 313-10700		ind3	44	C	T	T	-	-	-	C	C	C	T	C	-	-	-	-	C	-	G	C	T	T	-	A	-	G	G	C	T	T	C	G	T	G	G	G	G	G	-	-
ARC 12800::IRGC 42720-2::[IRIS 313-11296]	IRIS 313-11296	IRGC 127945	indx	1	C	ARC 12800::IRGC 42720-2::[IRIS 313-11296]	IRIS 313-11296	IRGC 127945	indx	50	C	T	T	-	-	-	C	C	C	T	C	-	-	-	-	C	-	G	C	T	T	-	A	-	G	G	C	T	T	C	G	T	G	G	G	G
JIIENUO::[B097]	B097		indx	0	A	JIIENUO::[B097]	B097		indx	59	C	T	T	-	-	-	C	C	C	T	C	-	-	-	-	A	A	G	C	T	T	-	A	-	G	G	C	T	T	C	G	T	G	G	G	G	T	T	-
TIEN SOM::IRGC 40759-2::[IRIS 313-11254]	IRIS 313-11254	IRGC 128186	ind3	0	A	TIEN SOM::IRGC 40759-2::[IRIS 313-11254]	IRIS 313-11254	IRGC 128186	ind3	53	C	T	T	-	-	-	C	C	C	T	C	-	-	-	-	C	-	G	C	T	T	-	A	-	G	G	C	T	T	C	G	T	G	G	G	G	T	T	-
DINGRAS::IRGC 44402-1::[IRIS 313-11334]	IRIS 313-11334		ind3	0	A	DINGRAS::IRGC 44402-1::[IRIS 313-11334]	IRIS 313-11334		ind3	49.5	C	T	T	-	-	-	C	C	C	T	C	-	-	-	-	A	A	G	C	T	T	-	A	-	G	G	C	T	T	C	G	T	G	G	G	G	G	-/T	-
AR 133::IRGC 53942-1::[IRIS 313-11493]	IRIS 313-11493	IRGC 127126	indx	0	A	AR 133::IRGC 53942-1::[IRIS 313-11493]	IRIS 313-11493	IRGC 127126	indx	60.5	C	T	T	-	-	-	C	C	C	T	C	-	-	-	-	A	A	G	C	T	T	-	A	-	G	G	C	T	T	C	G	T	G		G	G	T	T	-
TAUNGYA SABA::IRGC 58226-1::[IRIS 313-11549]	IRIS 313-11549	IRGC 128483	indx	0	A	TAUNGYA SABA::IRGC 58226-1::[IRIS 313-11549]	IRIS 313-11549	IRGC 128483	indx	43	C	T	T	-	-	-	C	C	C	T	C	-	-	-	-	C	-	G	C	T	T	-	A	-	G	G	C	T	T	C	G	T	G	G	G	G	G	-	-
MR 69::IRGC 60188-1::[IRIS 313-11588]	IRIS 313-11588	IRGC 127636	ind3	0	A	MR 69::IRGC 60188-1::[IRIS 313-11588]	IRIS 313-11588	IRGC 127636	ind3	54.5	C	T	T	-	-	-	C	C	C	T	C	-	-	-	-	A	A	G	C	T	T	-	A	-	G	G	C	T	T	C	G	T	G	G	G	G	T	T	-
RAI MAHK MEUANG::IRGC 66154-1::[IRIS 313-11711]	IRIS 313-11711	IRGC 132295	ind3	0	A	RAI MAHK MEUANG::IRGC 66154-1::[IRIS 313-11711]	IRIS 313-11711	IRGC 132295	ind3	64.5	C	T	T	-	-	-	C	C	C	T	C	-	-	-	-	A	A	G	C	T	T	-	A	-	G	G	C	T	T	C	G	T	G	G	G	G	T	T	-
KYAUK KYI::IRGC 82773-1::[IRIS 313-12072]	IRIS 313-12072	IRGC 135766	indx	0	A	KYAUK KYI::IRGC 82773-1::[IRIS 313-12072]	IRIS 313-12072	IRGC 135766	indx	58	C	T	T	-	-	-	C	C	C	T	C	-	-	-	-	C	-	G	C	T	T	-			G	G	C	T	T	C	G	T	G	G	G	G	G	-	-
AM BEUS::IRGC 87189-1::[IRIS 313-12146]	IRIS 313-12146	IRGC 127121	indx	0	A	AM BEUS::IRGC 87189-1::[IRIS 313-12146]	IRIS 313-12146	IRGC 127121	indx	55.5	C	T	T	-	-	-	C	C	C	T	C	-	-	-	-	A	A	G	C	T	T	-	A	-	G	G	C	T	T	C	G	T	G	G	G	G	T	T	-
SALA::IRGC 90457-1::[IRIS 313-12207]	IRIS 313-12207	IRGC 128456	indx	0	A	SALA::IRGC 90457-1::[IRIS 313-12207]	IRIS 313-12207	IRGC 128456	indx	52.5	C	T	T	-	-	-	C	C	C	T	C	-	-	-	-	A	A	G	C	T	T	-	A	-	G	G	C	T	T	C	G	T	G	G	G	G	T	T	-
DAMNOEUB KRAMOUM::IRGC 94084-2::[IRIS 313-12247]	IRIS 313-12247	IRGC 128026	ind3	0	A	DAMNOEUB KRAMOUM::IRGC 94084-2::[IRIS 313-12247]	IRIS 313-12247	IRGC 128026	ind3	52	C	T	T	-	-	-	C	C	C	T	C	-	-	-	-	A	A	G	C	T	T	-	A	-	G	G	C	T	T	C	G	T	G	G	G	G	T	T	-
EA KHAW NGAN::IRGC 95176-2::[IRIS 313-12260]	IRIS 313-12260	IRGC 128037	ind3	0	A	EA KHAW NGAN::IRGC 95176-2::[IRIS 313-12260]	IRIS 313-12260	IRGC 128037	ind3	60	C	T	T	-	-	-	C	C	C	T	C	-	-	-	-	A	A	G	C	T	T	-	A	-	G	G	C	T	T	C	G	T	G	G	G	G	T	T	-
LG 10178::IRGC 98526-1::[IRIS 313-12301]	IRIS 313-12301	IRGC 127556	indx	0	A	LG 10178::IRGC 98526-1::[IRIS 313-12301]	IRIS 313-12301	IRGC 127556	indx	50.5	C	T	T	-	-	-	C	C	C	T	C	-	-	-	-	A	A	G	C	T	T	-	A	-	G	G	C	T	T	C	G	T	G	G	G	G	G	-	-
LG 4153::IRGC 98528-1::[IRIS 313-12302]	IRIS 313-12302	IRGC 127560	ind3	0	A	LG 4153::IRGC 98528-1::[IRIS 313-12302]	IRIS 313-12302	IRGC 127560	ind3	56.5	C	T	T	-	-	-	C	C	C	T	C	-	-	-	-	A	A	G	C	T	T	-	A	-	G	G	C	T	T	C	G	T	G	G	G	G	T	T	-
CHAW GAM PRUED::IRGC 71103-1::[IRIS 313-8466]	IRIS 313-8466		ind3	0	A	CHAW GAM PRUED::IRGC 71103-1::[IRIS 313-8466]	IRIS 313-8466		ind3	48.5	C	T	T	-	-	-	C	C	C	T	C	-	-	-	-	A	A	G	C	T	T	-	A	-	G	G	C	T	T	C	G	T	G	G	G	G	T	T	-
ARC 11524::IRGC 42672-1::[IRIS 313-8946]	IRIS 313-8946	IRGC 125641	indx	0	A	ARC 11524::IRGC 42672-1::[IRIS 313-8946]	IRIS 313-8946	IRGC 125641	indx	49.5	C	T	T	-	-	-	C	C	C	T	C	-	-	-	-	C	-	G	C	T	T	-	A	-	G	G	C	T	T	C	G	T	G	G	G	G	T	T	-
AERJITUO::[B017]	B017	IRGC 135822	temp	0	A	AERJITUO::[B017]	B017	IRGC 135822	temp	103																C	-	G	C	T
GUANGKEXIANGNUO::[B066]	B066		temp	0	A	GUANGKEXIANGNUO::[B066]	B066		temp	105
YIZHIXIANG::[B077]	B077		temp	0	A	YIZHIXIANG::[B077]	B077		temp	107
HONGKEZHENUO::[B100]	B100		temp	0	A	HONGKEZHENUO::[B100]	B100		temp	111
HUANGPINUO::[B110]	B110		temp	0	A	HUANGPINUO::[B110]	B110		temp	97																		G	C	T	T	-	A	-
YUYANNUO::[B136]	B136		japx	0	A	YUYANNUO::[B136]	B136		japx	90
GENG 7623::[B141]	B141		admix	0	A	GENG 7623::[B141]	B141		admix	90.5
LENGSHUINUO::[B148]	B148		japx	0	A	LENGSHUINUO::[B148]	B148		japx	81.5
QINGJINZAOSHENG::[B167]	B167	IRGC 136029	temp	0	A	QINGJINZAOSHENG::[B167]	B167	IRGC 136029	temp	116
HONGMISANDAN::[B199]	B199		temp	0	A	HONGMISANDAN::[B199]	B199		temp	108.5
CHIKENUO::[B212]	B212		temp	0	A	CHIKENUO::[B212]	B212		temp	114
WUZIDUI::[B218]	B218		temp	0	A	WUZIDUI::[B218]	B218		temp	126
GUANTUIBAIHE 1::[B225]	B225		temp	0	A	GUANTUIBAIHE 1::[B225]	B225		temp	130.5
GARURA::IRGC 64111-1::[IRIS 313-10007]	IRIS 313-10007	IRGC 125749	indx	0	A	GARURA::IRGC 64111-1::[IRIS 313-10007]	IRIS 313-10007	IRGC 125749	indx	108
HAN NUO::IRGC 82350-1::[IRIS 313-10228]	IRIS 313-10228	IRGC 125758	temp	0	A	HAN NUO::IRGC 82350-1::[IRIS 313-10228]	IRIS 313-10228	IRGC 125758	temp	106.5																													T	C	G	T	G	G	G	G
NAGKAYAT::IRGC 584-1::[IRIS 313-10440]	IRIS 313-10440	IRGC 127642	temp	0	A	NAGKAYAT::IRGC 584-1::[IRIS 313-10440]	IRIS 313-10440	IRGC 127642	temp	110.5
KARA SHALI::IRGC 9293-1::[IRIS 313-10617]	IRIS 313-10617	IRGC 131998	temp	0	A	KARA SHALI::IRGC 9293-1::[IRIS 313-10617]	IRIS 313-10617	IRGC 131998	temp	122
KHAO DAM::IRGC 29481-3::[IRIS 313-11073]	IRIS 313-11073	IRGC 132272	subtrop	0	A	KHAO DAM::IRGC 29481-3::[IRIS 313-11073]	IRIS 313-11073	IRGC 132272	subtrop	66
E 21::IRGC 33929-2::[IRIS 313-11151]	IRIS 313-11151	IRGC 128035	ind3	0	A	E 21::IRGC 33929-2::[IRIS 313-11151]	IRIS 313-11151	IRGC 128035	ind3	127.5
K 78-13::IRGC 36794-2::[IRIS 313-11198]	IRIS 313-11198	IRGC 132425	temp	0	A	K 78-13::IRGC 36794-2::[IRIS 313-11198]	IRIS 313-11198	IRGC 132425	temp	94.5
IREQUIN::IRGC 44476-2::[IRIS 313-11336]	IRIS 313-11336	IRGC 128519	temp	0	A	IREQUIN::IRGC 44476-2::[IRIS 313-11336]	IRIS 313-11336	IRGC 128519	temp	93.5
XINTUAN HEI GU::IRGC 56159-1::[IRIS 313-11522]	IRIS 313-11522	IRGC 128505	japx	0	A	XINTUAN HEI GU::IRGC 56159-1::[IRIS 313-11522]	IRIS 313-11522	IRGC 128505	japx	131.5
HONG PI NUO::IRGC 59638-1::[IRIS 313-11575]	IRIS 313-11575	IRGC 127415	temp	0	A	HONG PI NUO::IRGC 59638-1::[IRIS 313-11575]	IRIS 313-11575	IRGC 127415	temp	109
WAN GENG BAI DAO TOU::IRGC 59948-1::[IRIS 313-11582]	IRIS 313-11582	IRGC 128499	temp	0	A	WAN GENG BAI DAO TOU::IRGC 59948-1::[IRIS 313-11582]	IRIS 313-11582	IRGC 128499	temp	96.5
SI WAN 14::IRGC 63019-1::[IRIS 313-11655]	IRIS 313-11655	IRGC 127815	temp	0	A	SI WAN 14::IRGC 63019-1::[IRIS 313-11655]	IRIS 313-11655	IRGC 127815	temp	110.5
TAIPEI 167::IRGC 65371-1::[IRIS 313-11698]	IRIS 313-11698	IRGC 128479	aro	0	A	TAIPEI 167::IRGC 65371-1::[IRIS 313-11698]	IRIS 313-11698	IRGC 128479	aro	105
CANLUBANG::IRGC 69816-1::[IRIS 313-11788]	IRIS 313-11788	IRGC 127247	japx	0	A	CANLUBANG::IRGC 69816-1::[IRIS 313-11788]	IRIS 313-11788	IRGC 127247	japx	128.5
PLE LIA::IRGC 73562-1::[IRIS 313-11900]	IRIS 313-11900	IRGC 128435	subtrop	0	A	PLE LIA::IRGC 73562-1::[IRIS 313-11900]	IRIS 313-11900	IRGC 128435	subtrop	129
DUAN SHEN ZI::IRGC 73962-1::[IRIS 313-11908]	IRIS 313-11908	IRGC 128284	temp	0	A	DUAN SHEN ZI::IRGC 73962-1::[IRIS 313-11908]	IRIS 313-11908	IRGC 128284	temp	118.5																							A	-
KHAO' NAN::IRGC 74981-1::[IRIS 313-11922]	IRIS 313-11922	IRGC 128340	subtrop	0	A	KHAO' NAN::IRGC 74981-1::[IRIS 313-11922]	IRIS 313-11922	IRGC 128340	subtrop	119.5
NAM JAM::IRGC 75069-1::[IRIS 313-11924]	IRIS 313-11924	IRGC 128400	subtrop	0	A	NAM JAM::IRGC 75069-1::[IRIS 313-11924]	IRIS 313-11924	IRGC 128400	subtrop	149.5	C	T	T	-	-	-	C	C	C	T	C	-	-	-	-	C	-	G	C	T	T	-															G	-	-
BLAU BLA::IRGC 78460-1::[IRIS 313-11984]	IRIS 313-11984		temp	0	A	BLAU BLA::IRGC 78460-1::[IRIS 313-11984]	IRIS 313-11984		temp	114.5
GYEONGSAN 1::IRGC 79404-1::[IRIS 313-12003]	IRIS 313-12003	IRGC 128305	temp	0	A	GYEONGSAN 1::IRGC 79404-1::[IRIS 313-12003]	IRIS 313-12003	IRGC 128305	temp	103.5
LIJIAN 942::IRGC 82399-1::[IRIS 313-12060]	IRIS 313-12060	IRGC 128365	japx	0	A	LIJIAN 942::IRGC 82399-1::[IRIS 313-12060]	IRIS 313-12060	IRGC 128365	japx	144
YUNLEN 13::IRGC 82402-1::[IRIS 313-12061]	IRIS 313-12061	IRGC 128509	temp	0	A	YUNLEN 13::IRGC 82402-1::[IRIS 313-12061]	IRIS 313-12061	IRGC 128509	temp	127
DON::IRGC 95117-1::[IRIS 313-12258]	IRIS 313-12258	IRGC 128283	subtrop	0	A	DON::IRGC 95117-1::[IRIS 313-12258]	IRIS 313-12258	IRGC 128283	subtrop	114.5																		G	C	T			A	-
POU::IRGC 98968-1::[IRIS 313-12307]	IRIS 313-12307	IRGC 132034	subtrop	0	A	POU::IRGC 98968-1::[IRIS 313-12307]	IRIS 313-12307	IRGC 132034	subtrop	126.5
DOK HIEN NOI::IRGC 107021-1::[IRIS 313-12337]	IRIS 313-12337	IRGC 127335	subtrop	0	A	DOK HIEN NOI::IRGC 107021-1::[IRIS 313-12337]	IRIS 313-12337	IRGC 127335	subtrop	93.5
LOUK NOK::IRGC 107599-1::[IRIS 313-12348]	IRIS 313-12348	IRGC 127575	subtrop	0	A	LOUK NOK::IRGC 107599-1::[IRIS 313-12348]	IRIS 313-12348	IRGC 127575	subtrop	128.5
MOK::IRGC 107804-1::[IRIS 313-12353]	IRIS 313-12353	IRGC 132017	subtrop	0	A	MOK::IRGC 107804-1::[IRIS 313-12353]	IRIS 313-12353	IRGC 132017	subtrop	87
VIETNAM 1::C1::[IRIS 313-8011]	IRIS 313-8011	IRGC 122281	subtrop	0	A	VIETNAM 1::C1::[IRIS 313-8011]	IRIS 313-8011	IRGC 122281	subtrop	112.5
KHAU TRA BONG::IRGC 78342-1::[IRIS 313-8578]	IRIS 313-8578	IRGC 125992	subtrop	0	A	KHAU TRA BONG::IRGC 78342-1::[IRIS 313-8578]	IRIS 313-8578	IRGC 125992	subtrop	86.5
NEP HOA VANG::[IRIS 313-8690]	IRIS 313-8690	IRGC 117537	japx	0	A	NEP HOA VANG::[IRIS 313-8690]	IRIS 313-8690	IRGC 117537	japx	96.5
NEP NGAU::IRGC 78369-1::[IRIS 313-8735]	IRIS 313-8735	IRGC 126074	japx	0	A	NEP NGAU::IRGC 78369-1::[IRIS 313-8735]	IRIS 313-8735	IRGC 126074	japx	89.5	C	T	T	-	-	-	C	C	C	T	C	-	-	-	-										G	G	C	T	T
LOMPUG::IRGC 71559-1::[IRIS 313-8883]	IRIS 313-8883		japx	0	A	LOMPUG::IRGC 71559-1::[IRIS 313-8883]	IRIS 313-8883		japx	94.5
HUK ZO::IRGC 19760-1::[IRIS 313-9886]	IRIS 313-9886	IRGC 125767	temp	0	A	HUK ZO::IRGC 19760-1::[IRIS 313-9886]	IRIS 313-9886	IRGC 125767	temp	105
TAM::IRGC 99161-1::[IRIS 313-12311]	IRIS 313-12311	IRGC 128481	subtrop	0	A	TAM::IRGC 99161-1::[IRIS 313-12311]	IRIS 313-12311	IRGC 128481	subtrop	38
QITOUGU::[B093]	B093		ind1A	0	A	QITOUGU::[B093]	B093		ind1A	92
BANGKOUY::IRGC 94037-1::[IRIS 313-12246]	IRIS 313-12246	IRGC 127208	ind3	0	A	BANGKOUY::IRGC 94037-1::[IRIS 313-12246]	IRIS 313-12246	IRGC 127208	ind3	49.5	C	T	T	-	-	-	C	C	C	T	C	-	-	-	-	C	-	G	C	T	T	-	A	-	G	G	C	T	T	C	G	T	G	G	G	G	G	-	-
ZHONGYOUZAO 81::[CX221]	CX221	IRGC 136095	indx	0	A	ZHONGYOUZAO 81::[CX221]	CX221	IRGC 136095	indx	122	C	T	C	C	C	C	C	C	C	T	T	T	A	G	A	C	-	G	C	T	T	-	A	-	G	G	C	T	C	C	A	C	A	G	A	A	G	-	-
ALTAMIRA 9::IRGC 116953-1::[IRIS 313-10257]	IRIS 313-10257	IRGC 127031	indx	0	A	ALTAMIRA 9::IRGC 116953-1::[IRIS 313-10257]	IRIS 313-10257	IRGC 127031	indx	90.5	C	T	T	-	-	-	C	C	C	T	C	-	-	-	-	A	A	G	C	T	T	-	C	C	G	G	C	T	C	C	A	C	A	G	A	A	G	-	-
BAANYALOJOPOIHUN::IRGC 7928-2::[IRIS 313-10576]	IRIS 313-10576	IRGC 127979	ind2	0	A	BAANYALOJOPOIHUN::IRGC 7928-2::[IRIS 313-10576]	IRIS 313-10576	IRGC 127979	ind2	110.5	C	T	T	-	-	-	C	C	C	T	C	-	-	-	-	C	-	G	C	T			A	-	G	G	C	T	C	C	A	C	A	G	A	A	G	-	-
ARC 13591::IRGC 41177-2::[IRIS 313-11260]	IRIS 313-11260	IRGC 127950	indx	0	A	ARC 13591::IRGC 41177-2::[IRIS 313-11260]	IRIS 313-11260	IRGC 127950	indx	75.5	C	T	T	-	-	-	C	C	C	T	C	-	-	-	-	A	A	G	C	T	T	-	A	-	G	G	C	T		C	G/A	T/C		G	G/A	G/A	T	T	-
IRGA 659-1-2-2-2::IRGC 117345-1::[IRIS 313-10403]	IRIS 313-10403	IRGC 120993	indx	0	A	IRGA 659-1-2-2-2::IRGC 117345-1::[IRIS 313-10403]	IRIS 313-10403	IRGC 120993	indx	82	C	T	T	-	-	-	C	C	C	T	C	-	-	-	-	C	-	G	C	T	C	C	C	C	G	G	C	T	C	C	A	C	A	G	A	A	G	-	-
RAUSRR 4::IRGC 79785-1::[IRIS 313-12013]	IRIS 313-12013	IRGC 127767	ind2	0	A	RAUSRR 4::IRGC 79785-1::[IRIS 313-12013]	IRIS 313-12013	IRGC 127767	ind2	60											C	-	-	-	-	C	-	G	C	T	T	-	A	-										G	A		G	-	-
BAOXIE 123B::[B202]	B202		indx	0	A	BAOXIE 123B::[B202]	B202		indx	43	C	T	T	-	-	-	C	C	C	T	C	-	-	-	-			G	C	T	T	-			G	G	C	T						G	A	A	G	-	-
LUYIN 46::[CX304]	CX304	IRGC 135975	indx	0	A	LUYIN 46::[CX304]	CX304	IRGC 135975	indx	135	C	T	T	-	-	-	C	C	C	T	T	T	A	G	A	A	A	G	C	T	T	-	A	-	G	G	C	T						G	A	A	G	-	-
N22::[CX368]	CX368	IRGC 135996	aus	0	A	N22::[CX368]	CX368	IRGC 135996	aus	56	C	T	T	-	-	-	C	C	C	T	C	-	-	-	-			G	C	T	T	-	A	-	G	G	C	T	C	C	A	C	A	G	A	A	G	-	-
CX424::[CX424]	CX424		ind1B	0	A	CX424::[CX424]	CX424		ind1B	85	C	T	T	-	-	-	C	C	C	T	C	-	-	-	-	C	-	G	C	T	T	-	C	C	G	G	C	T	C	C	A	C	A	G	A	A	G	-	-
DOMSIAH::[CX65]	CX65	IRGC 117467	aro	0	A	DOMSIAH::[CX65]	CX65	IRGC 117467	aro	99.5	C	T	C	C	C	C	C	C	C	T	T	T	A	G	A	A	A	G	C	T	T	-	A	-	G	G	C	T	C	C	A	C	A	G	A	A	G	-	-
NS 1576::IRGC 68951-1::[IRIS 313-10032]	IRIS 313-10032	IRGC 125858	aro	0	A	NS 1576::IRGC 68951-1::[IRIS 313-10032]	IRIS 313-10032	IRGC 125858	aro	96	C	T	T	-	-	-	C	C	C	T	T	T	A	G	A	C	-	G	C	T	T	-	A	-	G	G	C	T	C	C	A	C	A	G	A	A	G	-	-
LUBANG PUTI::IRGC 5429-1::[IRIS 313-10513]	IRIS 313-10513	IRGC 127579	indx	0	A	LUBANG PUTI::IRGC 5429-1::[IRIS 313-10513]	IRIS 313-10513	IRGC 127579	indx	71	C	T	T	-	-	-	C	C	C	T	C	-	-	-	-			G	C	T	T	-	A	-	G	G	C	T	C	C	A	C	A	G		A	G	-	-
221 C 391-1-3-3::IRGC 7600-1::[IRIS 313-10566]	IRIS 313-10566	IRGC 127099	indx	0	A	221 C 391-1-3-3::IRGC 7600-1::[IRIS 313-10566]	IRIS 313-10566	IRGC 127099	indx	66.5											C	-	-	-	-	C	-								G	G	C	T	C	C				G	A	A	G	-	-
KHSAY VENG::IRGC 22915-1::[IRIS 313-10903]	IRIS 313-10903	IRGC 135762	ind3	0	A	KHSAY VENG::IRGC 22915-1::[IRIS 313-10903]	IRIS 313-10903	IRGC 135762	ind3	59	C	T	T	-	-	-	C	C	C	T	C	-	-	-	-	C	-	G	C	T	T	-	A	-	G	G	C	T	C	C	A	C	A	G	A	A
NEANG NARY::IRGC 23084-1::[IRIS 313-10911]	IRIS 313-10911		ind3	0	A	NEANG NARY::IRGC 23084-1::[IRIS 313-10911]	IRIS 313-10911		ind3	59	C	T	T	-	-	-	C	C	C	T	C	-	-	-	-	C	-	G	C	T	T	-	A	-	G	G	C	T	C	C	A	C	A	G	A	A	G	-	-
PADI GRUNDUL 1::IRGC 25493-1::[IRIS 313-10954]	IRIS 313-10954	IRGC 127700	ind3	0	A	PADI GRUNDUL 1::IRGC 25493-1::[IRIS 313-10954]	IRIS 313-10954	IRGC 127700	ind3	100.5	C	T	T	-	-	-	C	C	C	T	C	-	-	-	-	C	-	G	C	T	C	C	A	-	G	G	C	T	C	C	A	C	A	G	A	A	G	-	-
BOTESWAR 2::IRGC 27536-1::[IRIS 313-11013]	IRIS 313-11013	IRGC 127236	aus	0	A	BOTESWAR 2::IRGC 27536-1::[IRIS 313-11013]	IRIS 313-11013	IRGC 127236	aus	70	C	T	T	-	-	-	C	C	C	T	T	T	A	G	A	C	-	G	C	T	T	-	A	-	G	G	C	T	C	C	A	C	A	G	A	A	G	-	-
BARA PASHAWARI 390::IRGC 27779-1::[IRIS 313-11021]	IRIS 313-11021	IRGC 127210	aro	0	A	BARA PASHAWARI 390::IRGC 27779-1::[IRIS 313-11021]	IRIS 313-11021	IRGC 127210	aro	78.5	C	T	T	-	-	-	C	C	C	T	C	-	-	-	-	C	-	G	C	T	T	-			G	G	C	T	C	C	A	C	A	G	A	A	G	-	-
BASMATI SURKH 161::IRGC 27797-1::[IRIS 313-11023]	IRIS 313-11023	IRGC 127214	aro	0	A	BASMATI SURKH 161::IRGC 27797-1::[IRIS 313-11023]	IRIS 313-11023	IRGC 127214	aro	55	C	T	T	-	-	-	C	C	C	T	C	-	-	-	-	C	-				T	-	A	-	G	G	C	T		C				G			G	-	-
AUS 233::IRGC 29036-1::[IRIS 313-11050]	IRIS 313-11050	IRGC 127180	aus	0	A	AUS 233::IRGC 29036-1::[IRIS 313-11050]	IRIS 313-11050	IRGC 127180	aus	117.5	C	T	T	-	-	-	C	C	C	T	C	-	-	-	-	C	-	G	C	T	T	-	A	-	G	G	C	T	C	C	A	C	A	G	A	A	G	-	-
AUS 359::IRGC 29146-2::[IRIS 313-11060]	IRIS 313-11060	IRGC 132322	aus	0	A	AUS 359::IRGC 29146-2::[IRIS 313-11060]	IRIS 313-11060	IRGC 132322	aus	75	C	T	T	-	-	-	C	C	C	T	C	-	-	-	-	C	-	G	C	T			A	-	G	G	C	T	C	C	A	C	A	G	A	A	G	-	-
DHARIAL::IRGC 34034-1::[IRIS 313-11154]	IRIS 313-11154	IRGC 127318	aus	0	A	DHARIAL::IRGC 34034-1::[IRIS 313-11154]	IRIS 313-11154	IRGC 127318	aus	44	C	T	T	-	-	-	C	C	C	T	C	-	-	-	-	C	-								G	G	C	T		C				G
ARC 13502::IRGC 41126-2::[IRIS 313-11258]	IRIS 313-11258	IRGC 127948	aro	0	A	ARC 13502::IRGC 41126-2::[IRIS 313-11258]	IRIS 313-11258	IRGC 127948	aro	154	C	T	C	C	C	C	C	C	C	T	T	T	A	G	A	A	A				T	-	A	-	G	G	C	T	C	C	A	C	A	G	A	A	G	-	-
ARC 13785::IRGC 41218-2::[IRIS 313-11261]	IRIS 313-11261	IRGC 127951	indx	0	A	ARC 13785::IRGC 41218-2::[IRIS 313-11261]	IRIS 313-11261	IRGC 127951	indx	52.5	C	T	T	-	-	-	C	C	C	T	C	-	-	-	-	C	-	G	C	T	T	-			G	G	C	T	C	C			A	G	A	A	G	-	-
ARC 10975::IRGC 42611-2::[IRIS 313-11293]	IRIS 313-11293	IRGC 127934	aro	0	A	ARC 10975::IRGC 42611-2::[IRIS 313-11293]	IRIS 313-11293	IRGC 127934	aro	66	C	T	T	-	-	-	C	C	C	T	C	-	-	-	-	C	-	G	C	T	T	-	A	-	G	G	C	T	C	C				G	A	A	G	-	-
CR 44-1::IRGC 45397-1::[IRIS 313-11356]	IRIS 313-11356		aro	0	A	CR 44-1::IRGC 45397-1::[IRIS 313-11356]	IRIS 313-11356		aro	104	C	T	T	-	-	-	C	C	C	T	T	T	A	G	A	C	-	G	C	T			A	-	G	G	C	T	C	C	A	C	A	G	A	A	G	-	-
KEYA NUNIA::IRGC 46117-2::[IRIS 313-11362]	IRIS 313-11362	IRGC 128080	aro	0	A	KEYA NUNIA::IRGC 46117-2::[IRIS 313-11362]	IRIS 313-11362	IRGC 128080	aro	69	C	T	C	C	C	C	C	C	C	T	C	-	-	-	-	C	-	G	C	T	T	-			G	G	C	T	C	C	A	C	A	G	A	A	G	-	-
SUITE JORA::IRGC 49257-2::[IRIS 313-11402]	IRIS 313-11402	IRGC 128174	indx	0	A	SUITE JORA::IRGC 49257-2::[IRIS 313-11402]	IRIS 313-11402	IRGC 128174	indx	66	C	T	T	-	-	-	C	C	C	T	C	-	-	-	-	C	-	G	C	T	T	-	A	-	G	G	C	T		C				G			G	-	-
C 1016-1::IRGC 50368-1::[IRIS 313-11423]	IRIS 313-11423	IRGC 127243	indx	0	A	C 1016-1::IRGC 50368-1::[IRIS 313-11423]	IRIS 313-11423	IRGC 127243	indx	44	C	T	T	-	-	-	C	C	C	T	C	-	-	-	-	C	-								G	G	C	T	C	C				G	A	A	G	-	-
KALISAL::IRGC 52324-1::[IRIS 313-11451]	IRIS 313-11451	IRGC 128330	aro	0	A	KALISAL::IRGC 52324-1::[IRIS 313-11451]	IRIS 313-11451	IRGC 128330	aro	74.5	C	T	T	-	-	-	C	C	C	T	C	-	-	-	-	C	-	G	C	T	T	-	A	-	G	G	C	T	T/C	C	G/A	T/C	A	G	A	A	G	-	-
KALU T 139::IRGC 53670-1::[IRIS 313-11489]	IRIS 313-11489	IRGC 127482	aus	0	A	KALU T 139::IRGC 53670-1::[IRIS 313-11489]	IRIS 313-11489	IRGC 127482	aus	131	C	T	C	C	C	C	C	C	C	T	T	T	A	G	A	C	-/A	G	C	T	T	-/A	A	-/A	G	G	C	T	C	C	G/A	C	G/A	G	G/A	G/A	G	-/A	-
SIRHANTI::IRGC 53930-1::[IRIS 313-11492]	IRIS 313-11492	IRGC 127813	aus	0	A	SIRHANTI::IRGC 53930-1::[IRIS 313-11492]	IRIS 313-11492	IRGC 127813	aus	123	C	T	T	-	-	-	C	C	C	T						C	-						A	-	G	G	C	T	C	C	A	C	A	G	A	A	G	-	-
KHAO BAWNG::IRGC 61260-1::[IRIS 313-11608]	IRIS 313-11608		ind3	0	A	KHAO BAWNG::IRGC 61260-1::[IRIS 313-11608]	IRIS 313-11608		ind3	41	C	T	T	-	-	-	C	C	C	T	C	-	-	-	-			G	C	T	T	-			G	G	C	T		C				G			G	-	-
JADO::IRGC 61966-1::[IRIS 313-11627]	IRIS 313-11627	IRGC 127448	aro	0	A	JADO::IRGC 61966-1::[IRIS 313-11627]	IRIS 313-11627	IRGC 127448	aro	103											C	-	-	-	-	C	-	G	C	T			A	-	G	G	C	T	C	C				G	A	A	G	-	-
KHAO PA::IRGC 85972-1::[IRIS 313-12130]	IRIS 313-12130	IRGC 127559	ind3	0	A	KHAO PA::IRGC 85972-1::[IRIS 313-12130]	IRIS 313-12130	IRGC 127559	ind3	80	C	T	T	-	-	-	C	C	C	T	C	-	-	-	-	A	A	G	C	T	T	-			G	G	C	T	C	C				G
B 6144-MR-6-0-0::C1::[IRIS 313-7641]	IRIS 313-7641	IRGC 121974	indx	0	A	B 6144-MR-6-0-0::C1::[IRIS 313-7641]	IRIS 313-7641	IRGC 121974	indx	55	C	T	T	-	-	-	C	C	C	T	C	-	-	-	-	C	-								G	G	C	T	C	C				G	A	A	G	-	-
IR 57920-AC 25-2-B::C1::[IRIS 313-7698]	IRIS 313-7698	IRGC 122098	indx	0	A	IR 57920-AC 25-2-B::C1::[IRIS 313-7698]	IRIS 313-7698	IRGC 122098	indx	70	C	T	T	-	-	-	C	C	C	T	C	-	-	-	-	C	-	G	C	T	T	-	A	-	G	G	C	T	C	C	A	C	A	G	A	A	G	-	-
SRAU SENG::IRGC 30290-1::[IRIS 313-8996]	IRIS 313-8996	IRGC 126169	ind3	0	A	SRAU SENG::IRGC 30290-1::[IRIS 313-8996]	IRIS 313-8996	IRGC 126169	ind3	65.5	C	T	T	-	-	-	C	C	C	T	C	-	-	-	-	A	A	G	C	T	T	-	A	-	G	G	C	T	C	C	A	C	A	G	A	A	G	-	-
PUTEH KACA::IRGC 66614-1::[IRIS 313-9310]	IRIS 313-9310	IRGC 131946	ind3	0	A	PUTEH KACA::IRGC 66614-1::[IRIS 313-9310]	IRIS 313-9310	IRGC 131946	ind3	67	C	T	T	-	-	-	C	C	C	T	C	-	-	-	-	C	-	G	C	T			C	C	G	G	C	T	C	C	A	C	A	G	A	A	G	-	-
MATIANG::IRGC 18220-1::[IRIS 313-10792]	IRIS 313-10792	IRGC 127613	ind3	0	A	MATIANG::IRGC 18220-1::[IRIS 313-10792]	IRIS 313-10792	IRGC 127613	ind3	76	C	T	T	-	-	-	C	C	C	T	C	-	-	-	-			G	C	T	T	-			G	G	C	T	C	C	A	C	A	G	A	A	G	-	-
KUOL DAUN THNONG::IRGC 22986-1::[IRIS 313-10905]	IRIS 313-10905		ind3	0	A	KUOL DAUN THNONG::IRGC 22986-1::[IRIS 313-10905]	IRIS 313-10905		ind3	72.5	C	T	T	-	-	-	C	C	C	T	C	-	-	-	-	C	-	G	C	T			A	-	G	G	C	T	C	C	A	C	A	G	A	A	G	-	-
MAMORIAKA::IRGC 77867-1::[IRIS 313-11977]	IRIS 313-11977	IRGC 127601	indx	0	A	MAMORIAKA::IRGC 77867-1::[IRIS 313-11977]	IRIS 313-11977	IRGC 127601	indx	46.5	C	T	T	-	-	-	C	C	C	T	C	-	-	-	-	C	-	G	C	T	T	-	A	-	G	G	C	T	T/C	C	G/A	T/C	G/A	G			G	-	-
ZACAODAO 13::[B049]	B049	IRGC 136086	aus	0	A	ZACAODAO 13::[B049]	B049	IRGC 136086	aus	107	C	T	T	-	-	-	C	C	C	T	C	-	-	-	-	A	A	G	C	T	T	-	A	-	G	G	C	T	C	C	A	C	A	G	A	A	G	-	-
ZAOSHUXIANGHEIMI::[B123]	B123		indx	0	A	ZAOSHUXIANGHEIMI::[B123]	B123		indx	77.5	C	T	C	C	C	C	C	C	C	T	C	-	-	-	-	C	-/A	G	C	T	T	-/A	C	A/C	G	G	C	T	T/C	C				G	A	A	G	-/A	-
XIANGAIZAO 10HAO::[B232]	B232		ind1B	0	A	XIANGAIZAO 10HAO::[B232]	B232		ind1B	81	C	T	C	C	C	C	C	C	C	T	C	-	-	-	-	A	A	G	C	T	T	-	A	-	G	G	C	T	C	C	A	C	A	G	A	A	G	-	-
BG90-2::[CX21]	CX21	IRGC 135842	ind1B	0	A	BG90-2::[CX21]	CX21	IRGC 135842	ind1B	53	C	T	T	-	-	-	C	C	C	T						C	-	G	C	T	T	-	A	-	G	G	C	T	C	C							G	-	-
ZH5::[CX305]	CX305	IRGC 136090	ind1B	0	A	ZH5::[CX305]	CX305	IRGC 136090	ind1B	101	C	T	C	C	C	C	C	C	C	T	T	T	A	G	A	A	A	G	C	T	C	C	C	C	G	G	C	T	C	C	A	C	A	G	A	A	G	-	-
NPT-114::[CX386]	CX386	IRGC 136012	indx	0	A	NPT-114::[CX386]	CX386	IRGC 136012	indx	64	C	T	T	-	-	-	C	C	C	T	C	-	-	-	-	C	-	G	C	T	T	-	A	-	G	G	C	T	C	C				G			G	-	-
MR77(SEBERANG )::[CX70]	CX70	IRGC 135994	indx	0	A	MR77(SEBERANG )::[CX70]	CX70	IRGC 135994	indx	59	C	T	T	-	-	-	C	C	C	T	C	-	-	-	-	C	-	G	C	T	T	-	A	-	G	G	C	T	C	C	A	C	A	G	A	A	G	-	-
IRGA 411-1-6-1F-A::IRGC 117344-1::[IRIS 313-10402]	IRIS 313-10402	IRGC 125990	ind1B	0	A	IRGA 411-1-6-1F-A::IRGC 117344-1::[IRIS 313-10402]	IRIS 313-10402	IRGC 125990	ind1B	67.5	C	T	C	C	C	C	C	C	C	T	C	-	-	-	-	A	A	G	C	T	T	-	A	-	G	G	C	T	C	C	A	C	A	G	A	A	G	-	-
RR 272-17-829::IRGC 117354-1::[IRIS 313-10412]	IRIS 313-10412	IRGC 121103	indx	0	A	RR 272-17-829::IRGC 117354-1::[IRIS 313-10412]	IRIS 313-10412	IRGC 121103	indx	45											C	-	-	-	-	A	A	G	C	T	T	-			G	G	C	T	C	C				G	A		G	-	-
LUA HUONG T 1::IRGC 7082-2::[IRIS 313-10555]	IRIS 313-10555	IRGC 128098	ind3	0	A	LUA HUONG T 1::IRGC 7082-2::[IRIS 313-10555]	IRIS 313-10555	IRGC 128098	ind3	67	C	T	T	-	-	-	C	C	C	T	C	-	-	-	-	C	-	G	C	T	T	-	A	-	G	G	C	T	C	C				G	G/A	G/A	G	-	-
SOSSOKA OULE::IRGC 7850-2::[IRIS 313-10573]	IRIS 313-10573	IRGC 128168	ind2	0	A	SOSSOKA OULE::IRGC 7850-2::[IRIS 313-10573]	IRIS 313-10573	IRGC 128168	ind2	66	C	T	T	-	-	-	C	C	C	T	C	-	-	-	-	C	-	G	C	T	T	-	A	-	G	G	C	T	C	C	A	C	A	G	A	A	G	-	-
DJ 69::IRGC 8482-1::[IRIS 313-10592]	IRIS 313-10592	IRGC 127324	aus	0	A	DJ 69::IRGC 8482-1::[IRIS 313-10592]	IRIS 313-10592	IRGC 127324	aus	76.5	C	T	T	-	-	-	C	C	C	T	C	-	-	-	-			G	C	T	T	-	A	-	G	G	C	T	C	C	A	C	A	G	A	A	G	-	-
HEGAR MANAH::IRGC 17733-1::[IRIS 313-10774]	IRIS 313-10774	IRGC 127404	indx	0	A	HEGAR MANAH::IRGC 17733-1::[IRIS 313-10774]	IRIS 313-10774	IRGC 127404	indx	73	C	T	T	-	-	-	C	C	C	T	C	-	-	-	-	A	A	G	C	T	T	-	A	-	G	G	C	T		C				G			G	-	-
NANE::IRGC 25035-1::[IRIS 313-10947]	IRIS 313-10947	IRGC 127643	ind3	0	A	NANE::IRGC 25035-1::[IRIS 313-10947]	IRIS 313-10947	IRGC 127643	ind3	69	C	T	T	-	-	-	C	C	C	T								G	C	T	T	-	A	-	G	G	C	T	C	C				G			G	-	-
DUDHSAR::IRGC 26609-2::[IRIS 313-10984]	IRIS 313-10984	IRGC 128034	ind2	0	A	DUDHSAR::IRGC 26609-2::[IRIS 313-10984]	IRIS 313-10984	IRGC 128034	ind2	83	C	T	T	-	-	-	C	C	C	T	C	-	-	-	-	C	-	G	C	T	T	-			G	G	C	T	C	C	A	C	A	G	A	A	G	-	-
AUS 329::IRGC 29116-1::[IRIS 313-11058]	IRIS 313-11058	IRGC 127188	aus	0	A	AUS 329::IRGC 29116-1::[IRIS 313-11058]	IRIS 313-11058	IRGC 127188	aus	131.5	C	T	C	C	C	C	C	C	C	T	T	T	A	G	A	A	A	G	C	T	T	-	A	-	G	G	C	T	C	C	A	C	A	G	A	A	G	-	-
NON HAI::IRGC 29636-2::[IRIS 313-11078]	IRIS 313-11078	IRGC 132359	indx	0	A	NON HAI::IRGC 29636-2::[IRIS 313-11078]	IRIS 313-11078	IRGC 132359	indx	88	C	T	T	-	-	-	C	C	C	T	C	-	-	-	-	A	A	G	C	T	T	-	A	-	G	G	C	T	C	C				G	A	A	G	-	-
ARC 13919::IRGC 41313-2::[IRIS 313-11263]	IRIS 313-11263	IRGC 127953	indx	0	A	ARC 13919::IRGC 41313-2::[IRIS 313-11263]	IRIS 313-11263	IRGC 127953	indx	110.5	C	T					C	C	C	T	T	T	A	G	A	A	A	G	C	T	T	-	A	-	G	G	C	T	C	C	A	C	A	G	A	A	G	-	-
ARC 14868::IRGC 43009-2::[IRIS 313-11301]	IRIS 313-11301	IRGC 127963	ind2	0	A	ARC 14868::IRGC 43009-2::[IRIS 313-11301]	IRIS 313-11301	IRGC 127963	ind2	94	C	T	T	-	-	-	C	C	C	T	T	T	A	G	A	A	A	G	C	T	T	-	C	C	G	G	C	T	C	C				G	A	A	G	-	-
ARC 15097::IRGC 43053-1::[IRIS 313-11303]	IRIS 313-11303	IRGC 128228	indx	0	A	ARC 15097::IRGC 43053-1::[IRIS 313-11303]	IRIS 313-11303	IRGC 128228	indx	97	C	T	T	-	-	-	C	C	C	T	C	-	-	-	-			G	C	T	C	C	A	-	G	G	C	T	C	C	A	C	A	G	A	A	G	-	-
PADI HITAM::IRGC 43496-1::[IRIS 313-11312]	IRIS 313-11312	IRGC 135781	ind3	0	A	PADI HITAM::IRGC 43496-1::[IRIS 313-11312]	IRIS 313-11312	IRGC 135781	ind3	101	C	T	C	C	C	C	C	C	C	T	C	-	-	-	-	C	-	G	C	T	T	-	A	-	G	G	C	T	C	C	A	C	A	G	A	A	G	-	-
GANDHISAIL::IRGC 43826-2::[IRIS 313-11321]	IRIS 313-11321	IRGC 128043	ind2	0	A	GANDHISAIL::IRGC 43826-2::[IRIS 313-11321]	IRIS 313-11321	IRGC 128043	ind2	89	C	T	T	-	-	-	C	C	C	T	C	-	-	-	-	A	A	G	C	T	T	-	C	C	G	G	C	T	C	C	A	C	A	G	A	A	G	-	-
W 398::IRGC 46787-1::[IRIS 313-11374]	IRIS 313-11374	IRGC 127889	aus	0	A	W 398::IRGC 46787-1::[IRIS 313-11374]	IRIS 313-11374	IRGC 127889	aus	81	C	T	T	-	-	-	C	C	C	T	C	-	-	-	-	A	A	G	C	T	T	-	A	-	G	G	C	T	C	C	A		A	G	A	A	G	-	-
NAH MOI::IRGC 48353-2::[IRIS 313-11390]	IRIS 313-11390	IRGC 128114	ind3	0	A	NAH MOI::IRGC 48353-2::[IRIS 313-11390]	IRIS 313-11390	IRGC 128114	ind3	71	C	T	T	-	-	-	C	C	C	T	C	-	-	-	-	C	-	G	C	T	T	-	A	-	G	G	C	T	C	C	A	C	A	G	A	A	G	-	-
BATCHA BHOG (SCENTED)::IRGC 49440-2::[IRIS 313-11407]	IRIS 313-11407	IRGC 127989	ind2	0	A	BATCHA BHOG (SCENTED)::IRGC 49440-2::[IRIS 313-11407]	IRIS 313-11407	IRGC 127989	ind2	81	C	T	T	-	-	-	C	C	C	T	C	-	-	-	-	A	A	G	C	T	T	-	A	-	G	G	C	T	C	C	A	C	A	G	A	A	G	-	-
CHATO::IRGC 55825-1::[IRIS 313-11513]	IRIS 313-11513	IRGC 127269	ind1B	0	A	CHATO::IRGC 55825-1::[IRIS 313-11513]	IRIS 313-11513	IRGC 127269	ind1B	105	C	T	T	-	-	-	C	C	C	T	C	-	-	-	-	C	-	G	C	T	T	-	A	-	G	G	C	T	C	C	A	C	A	G	A	A	G	-	-
SIA MOO::IRGC 64629-1::[IRIS 313-11688]	IRIS 313-11688	IRGC 135581	ind3	0	A	SIA MOO::IRGC 64629-1::[IRIS 313-11688]	IRIS 313-11688	IRGC 135581	ind3	58	C	T	T	-	-	-	C	C	C	T	C	-	-	-	-	A	A												C	C	A	C	A	G	A	A	G	-	-
DAWK PUT::IRGC 66699-1::[IRIS 313-11719]	IRIS 313-11719	IRGC 127304	ind3	0	A	DAWK PUT::IRGC 66699-1::[IRIS 313-11719]	IRIS 313-11719	IRGC 127304	ind3	141.5	C	T	C	C	C	C	C	C	C	T	C	-	-	-	-	A	A	G	C	T	T	-	A	-/C	G	G	C	T	C	C	A	C	A	G	A	A	G	-/C	-
KANGRI::IRGC 73104-1::[IRIS 313-11888]	IRIS 313-11888	IRGC 127488	aus	0	A	KANGRI::IRGC 73104-1::[IRIS 313-11888]	IRIS 313-11888	IRGC 127488	aus	53	C	T	T	-	-	-	C	C	C	T	C	-	-	-	-	C	-	G	C	T	T	-	A	-	G	G	C	T	C	C	A	C	A	G	A	A	G	-	-
KHAU DANH::IRGC 73201-1::[IRIS 313-11893]	IRIS 313-11893	IRGC 127519	indx	0	A	KHAU DANH::IRGC 73201-1::[IRIS 313-11893]	IRIS 313-11893	IRGC 127519	indx	58	C	T	T	-	-	-	C	C	C	T	C	-	-	-	-	C	-	G	C	T	T	-	A	-	G	G	C	T	C	C							G	-	-
CA HIM::IRGC 73246-1::[IRIS 313-11896]	IRIS 313-11896	IRGC 132394	ind3	0	A	CA HIM::IRGC 73246-1::[IRIS 313-11896]	IRIS 313-11896	IRGC 132394	ind3	75.5	C	T	T	-	-	-	C	C	C	T	C	-	-	-	-	A	A	G	C	T	T	-	A	-	G	G	C	T	C	C				G			G	-	-
CEMPO TURI::IRGC 73667-1::[IRIS 313-11902]	IRIS 313-11902	IRGC 127251	ind3	0	A	CEMPO TURI::IRGC 73667-1::[IRIS 313-11902]	IRIS 313-11902	IRGC 127251	ind3	86	C	T	T	-	-	-	C	C	C	T	C	-	-	-	-	A	A	G	C	T	T	-	C	C	G	G	C	T	C	C	A	C	A	G	A	A	G	-	-
IB 11::IRGC 74420-2::[IRIS 313-11914]	IRIS 313-11914	IRGC 132252	ind2	0	A	IB 11::IRGC 74420-2::[IRIS 313-11914]	IRIS 313-11914	IRGC 132252	ind2	84	C	T	C	C	C	C	C	C	C	T	C	-	-	-	-	C	-	G	C	T	T	-	A	-	G	G	C	T	C	C	A	C	A	G	A	A	G	-	-
BIE LEI::IRGC 76478-1::[IRIS 313-11947]	IRIS 313-11947	IRGC 127226	indx	0	A	BIE LEI::IRGC 76478-1::[IRIS 313-11947]	IRIS 313-11947	IRGC 127226	indx	78	C	T	C	C	C	C	C	C	C	T	C	-	-	-	-	C	-				T	-	A	-	G	G	C	T	C	C	A	C	A	G	A	A	G	-	-
BARUM::IRGC 79108-1::[IRIS 313-11997]	IRIS 313-11997	IRGC 127213	ind3	0	A	BARUM::IRGC 79108-1::[IRIS 313-11997]	IRIS 313-11997	IRGC 127213	ind3	50	C	T	T	-	-	-	C	C	C	T						C	-						A	-	G	G	C	T	C	C	A	C	A	G	A	A	G	-	-
KUJAM KURIT::IRGC 81477-1::[IRIS 313-12046]	IRIS 313-12046	IRGC 132282	ind3	0	A	KUJAM KURIT::IRGC 81477-1::[IRIS 313-12046]	IRIS 313-12046	IRGC 132282	ind3	58	C	T	C	C	C	C	C	C	C	T	T	T	A	G	A			G	C	T	T	-	A	-	G	G	C	T	C	C	A		A	G	A	A	G	-	-
PA PHA EA::IRGC 87751-1::[IRIS 313-12161]	IRIS 313-12161	IRGC 127717	ind3	0	A	PA PHA EA::IRGC 87751-1::[IRIS 313-12161]	IRIS 313-12161	IRGC 127717	ind3	98	C	T	T	-	-	-	C	C	C	T	C	-	-	-	-	A	A	G	C	T	T	-	A	-	G	G	C	T	C	C	A	C	A	G	A	A	G	-	-
EA NOUAN::IRGC 95147-1::[IRIS 313-12259]	IRIS 313-12259	IRGC 127352	ind3	0	A	EA NOUAN::IRGC 95147-1::[IRIS 313-12259]	IRIS 313-12259	IRGC 127352	ind3	84	C	T	T	-	-	-	C	C	C	T	C	-	-	-	-	C	-	G	C	T			A	-	G	G	C	T		C				G	A	A	G	-	-
TOAM JUM::IRGC 96077-1::[IRIS 313-12270]	IRIS 313-12270	IRGC 127864	indx	0	A	TOAM JUM::IRGC 96077-1::[IRIS 313-12270]	IRIS 313-12270	IRGC 127864	indx	61.5	C	T	T	-	-	-	C	C	C	T	C	-	-	-	-	C	-	G	C	T	T	-	A	-	G	G	C	T	C	C	A	C	A	G	A	A	G	-	-
SANPATONG NYAY::IRGC 99050-1::[IRIS 313-12309]	IRIS 313-12309	IRGC 127785	ind3	0	A	SANPATONG NYAY::IRGC 99050-1::[IRIS 313-12309]	IRIS 313-12309	IRGC 127785	ind3	73	C	T	T	-	-	-	C	C	C	T	C	-	-	-	-	C	-	G	C	T	T	-	A	-	G	G	C	T	C	C	A	C	A	G	A	A	G	-	-
IR 4630-22-2-5-1-3::G1::[IRIS 313-15898]	IRIS 313-15898	IRGC 126962	indx	0	A	IR 4630-22-2-5-1-3::G1::[IRIS 313-15898]	IRIS 313-15898	IRGC 126962	indx	44	C	T	C	C	C	C	C	C	C	T	C	-	-	-	-	C	-	G	C	T	T	-	A	-	G	G	C	T	C	C	A	C	A	G	A	A	G	-	-
ORIONE::GERVEX 333-C1::[IRIS 313-8068]	IRIS 313-8068	IRGC 122184	indx	0	A	ORIONE::GERVEX 333-C1::[IRIS 313-8068]	IRIS 313-8068	IRGC 122184	indx	70	C	T	T	-	-	-	C	C	C	T	C	-	-	-	-	C	-	G	C	T	T	-	A	-	G	G	C	T	C	C	A	C	A	G	A	A	G	-	-
DAWN CI 9534::GERVEX 481-C1::[IRIS 313-8073]	IRIS 313-8073	IRGC 122033	aus	0	A	DAWN CI 9534::GERVEX 481-C1::[IRIS 313-8073]	IRIS 313-8073	IRGC 122033	aus	63	C	T	C	C	C	C	C	C	C	T	C	-	-	-	-	A	A	G	C	T	T	-	A	-	G	G	C	T	C								G	-	-
CARREON::[IRIS 313-8292]	IRIS 313-8292	IRGC 117442	ind3	0	A	CARREON::[IRIS 313-8292]	IRIS 313-8292	IRGC 117442	ind3	76	C	T	C	C	C	C	C	C	C	T	C	-	-	-	-	A	A	G	C	T	T	-			G	G	C	T	C	C	A	C	A	G	A	A	G	-	-
KUNENG::IRGC 71545-1::[IRIS 313-8492]	IRIS 313-8492	IRGC 126226	ind3	0	A	KUNENG::IRGC 71545-1::[IRIS 313-8492]	IRIS 313-8492	IRGC 126226	ind3	50	C	T	T	-	-	-	C	C	C	T	C	-	-	-	-	A	A	G	C	T	T	-	A	-	G	G	C	T	C	C				G			G	-	-
NG KARAN DE::IRGC 43489-1::[IRIS 313-8536]	IRIS 313-8536	IRGC 135539	ind3	0	A	NG KARAN DE::IRGC 43489-1::[IRIS 313-8536]	IRIS 313-8536	IRGC 135539	ind3	96	C	T	C	C	C	C	C	C	C	T	T	T	A	G	A	C	-	G	C	T	T	-	A	-	G	G	C	T	C	C	A	C	A	G	A	A	G	-	-
KHAO PLAH LAI NAK::IRGC 65941-1::[IRIS 313-8870]	IRIS 313-8870		ind3	0	A	KHAO PLAH LAI NAK::IRGC 65941-1::[IRIS 313-8870]	IRIS 313-8870		ind3	68.5																C	-	G	C	T					G	G	C	T	C	C	A	C	A	G	A	A	G	-	-
MAE MAI LUD NI::IRGC 66065-1::[IRIS 313-9062]	IRIS 313-9062	IRGC 125831	ind3	0	A	MAE MAI LUD NI::IRGC 66065-1::[IRIS 313-9062]	IRIS 313-9062	IRGC 125831	ind3	85	C	T	T	-	-	-	C	C	C	T	C	-	-	-	-	A	A	G	C	T	T	-	A	-	G	G	C	T	C	C	A	C	A	G	A	A	G	-	-
AUS 78-62::IRGC 69456-1::[IRIS 313-9294]	IRIS 313-9294	IRGC 131929	ind2	0	A	AUS 78-62::IRGC 69456-1::[IRIS 313-9294]	IRIS 313-9294	IRGC 131929	ind2	136	C	T	T	-	-	-	C	C	C	T	C	-	-	-	-	A	A	G	C	T	T	-	A	-	G	G	C	T	C	C	A	C	A	G	A	A	G	-	-
HAM 48::IRGC 29740-1::[IRIS 313-9357]	IRIS 313-9357	IRGC 128532	ind3	0	A	HAM 48::IRGC 29740-1::[IRIS 313-9357]	IRIS 313-9357	IRGC 128532	ind3	73	C	T	T	-	-	-	C	C	C	T	C	-	-	-	-	C	-	G	C	T	T	-	C	C	G	G	C	T	C	C				G			G	-	-
CHANDARHAT::IRGC 25845-1::[IRIS 313-9368]	IRIS 313-9368	IRGC 121605	aus	0	A	CHANDARHAT::IRGC 25845-1::[IRIS 313-9368]	IRIS 313-9368	IRGC 121605	aus	66.5	C	T	T	-	-	-	C	C	C	T	C	-	-	-	-	C	-	G	C	T	T	-	A	-	G	G	C	T		C							G	-	-
NCS 964 C::IRGC 62604-1::[IRIS 313-9400]	IRIS 313-9400	IRGC 125854	indx	0	A	NCS 964 C::IRGC 62604-1::[IRIS 313-9400]	IRIS 313-9400	IRGC 125854	indx	82	C	T	C	C	C	C	C	C	C	T	T	T	A	G	A	C	-	G	C	T	T	-	A	-	G	G	C	T		C				G	A	A	G	-	-
B 78-S81::IRGC 58415-1::[IRIS 313-9574]	IRIS 313-9574	IRGC 125662	indx	0	A	B 78-S81::IRGC 58415-1::[IRIS 313-9574]	IRIS 313-9574	IRGC 125662	indx	97	C	T	T	-	-	-	C	C	C	T	C	-	-	-	-	A	A	G	C	T	T	-	A	-	G	G	C	T									G	-	-
SOM DIGUIME::IRGC 56751-1::[IRIS 313-9986]	IRIS 313-9986	IRGC 126168	indx	0	A	SOM DIGUIME::IRGC 56751-1::[IRIS 313-9986]	IRIS 313-9986	IRGC 126168	indx	76	C	T	T	-	-	-	C	C	C	T	C	-	-	-	-	A	A	G	C	T	T	-	A	-	G	G	C	T	C	C	A	C	A	G	A	A	G	-	-
SATHI::IRGC 46659-1::[IRIS 313-11371]	IRIS 313-11371	IRGC 127788	aus	0	A	SATHI::IRGC 46659-1::[IRIS 313-11371]	IRIS 313-11371	IRGC 127788	aus	93.5	C	T	T	-	-	-	C	C	C	T	C	-	-	-	-	C	-				T	-	A	-	G	G	C	T	C	C	A	C	A	G	A	A	G	-	-
ZIMANGFEIE::[B111]	B111		temp	0	A	ZIMANGFEIE::[B111]	B111		temp	111	C	T	T	-	-	-	C	C	C	T															G	G	C	T		C	G	T	G	G	G	G
IRBB62::[CX369]	CX369	IRGC 135947	ind1B	0	A	IRBB62::[CX369]	CX369	IRGC 135947	ind1B	107.5	C	T	C	C	C	C	C	C	C	T	T	T	A	G	A	A	A	G	C	T	T	-	A	-	G	G	C	T	C	C	A	C	A	G	A	A	G	-	-
TAROM MOLAII::[CX66]	CX66	IRGC 136052	aro	0	A	TAROM MOLAII::[CX66]	CX66	IRGC 136052	aro	89	C	T	T	-	-	-	C	C	C	T	T	T	A	G	A	C	-	G	C	T	T	-	A	-	G	G	C	T	C	C	A	C	A	G	A	A	G	-	-
BINAM::[CX67]	CX67	IRGC 135845	aro	0	A	BINAM::[CX67]	CX67	IRGC 135845	aro	70	C	T	T	-	-	-	C	C	C	T	C	-	-	-	-			G	C	T	T	-	A	-	G	G	C	T		C				G			G	-	-
CAMPENA::IRGC 5452-2::[IRIS 313-10514]	IRIS 313-10514	IRGC 135629	indx	0	A	CAMPENA::IRGC 5452-2::[IRIS 313-10514]	IRIS 313-10514	IRGC 135629	indx	55											C	-	-	-	-	C	-	G	C	T	T	-	A	-						C	A	C	A	G	A	A	G	-	-
SANNABATHA::IRGC 5971-1::[IRIS 313-10521]	IRIS 313-10521		aro	0	A	SANNABATHA::IRGC 5971-1::[IRIS 313-10521]	IRIS 313-10521		aro	78	C	T	T	-	-	-	C	C	C	T	C	-	-	-	-	C	-	G	C	T	T	-	A	-	G	G	C	T	C	C	A			G			G	-	-
BASMATI SUFAID 100::IRGC 27791-1::[IRIS 313-11022]	IRIS 313-11022	IRGC 135737	aro	0	A	BASMATI SUFAID 100::IRGC 27791-1::[IRIS 313-11022]	IRIS 313-11022	IRGC 135737	aro	80	C	T	T	-	-	-	C	C	C	T	C	-	-	-	-	C	-	G	C	T	T	-			G	G	C	T	C	C	A	C	A	G	A	A	G	-	-
RATRIO::IRGC 28181-1::[IRIS 313-11033]	IRIS 313-11033	IRGC 128448	admix	0	A	RATRIO::IRGC 28181-1::[IRIS 313-11033]	IRIS 313-11033	IRGC 128448	admix	116	C	T	C	C	C	C	C	C	C	T	T	T	A	G	A	C	-	G	C	T	T	-	C	C	G	G	C	T	C	C	A	C	A	G	A	A	G	-	-
SRAU KHSAI::IRGC 29896-2::[IRIS 313-11088]	IRIS 313-11088	IRGC 128170	ind3	0	A	SRAU KHSAI::IRGC 29896-2::[IRIS 313-11088]	IRIS 313-11088	IRGC 128170	ind3	48	C	T	T	-	-	-	C	C	C	T	C	-	-	-	-	C	-				T	-			G	G	C	T	C	C				G	A	A	G	-	-
BENA JHUPI::IRGC 34850-2::[IRIS 313-11165]	IRIS 313-11165	IRGC 127993	aus	0	A	BENA JHUPI::IRGC 34850-2::[IRIS 313-11165]	IRIS 313-11165	IRGC 127993	aus	66.5	C	T	T	-	-	-	C	C	C	T	C	-	-	-	-	C	-	G	C	T					G	G	C	T	C	C	A	C	A	G	A	A	G	-	-
SHITTA AMAN::IRGC 37596-1::[IRIS 313-11214]	IRIS 313-11214	IRGC 127799	aus	0	A	SHITTA AMAN::IRGC 37596-1::[IRIS 313-11214]	IRIS 313-11214	IRGC 127799	aus	68											C	-	-	-	-	C	-	G	C	T	T	-	A	-	G	G	C	T	C	C	A	C	A	G	A	A	G	-	-
PENDEK LAYUNG::IRGC 43542-2::[IRIS 313-11315]	IRIS 313-11315	IRGC 128131	ind3	0	A	PENDEK LAYUNG::IRGC 43542-2::[IRIS 313-11315]	IRIS 313-11315	IRGC 128131	ind3	54.5	C	T	T	-	-	-	C	C	C	T	C	-	-	-	-	A	A	G	C	T	T	-	A	-	G	G	C	T	T/C	C		C	A	G			G	-	-
BR 51-115-4::IRGC 43999-1::[IRIS 313-11326]	IRIS 313-11326	IRGC 127237	indx	0	A	BR 51-115-4::IRGC 43999-1::[IRIS 313-11326]	IRIS 313-11326	IRGC 127237	indx	76	C	T	T	-	-	-	C	C	C	T	C	-	-	-	-	C	-	G	C	T	T	-	C	C	G	G	C	T	C	C	A	C	A	G	A	A	G	-	-
T 3::IRGC 46760-2::[IRIS 313-11373]	IRIS 313-11373	IRGC 128177	aro	0	A	T 3::IRGC 46760-2::[IRIS 313-11373]	IRIS 313-11373	IRGC 128177	aro	74	C	T	T	-	-	-	C	C	C	T	C	-	-	-	-	C	-	G	C	T	T	-	A	-	G	G	C	T	C	C	A	C	A	G	A	A	G	-	-
LAWANGAI::IRGC 49850-2::[IRIS 313-11417]	IRIS 313-11417	IRGC 132256	admix	0	A	LAWANGAI::IRGC 49850-2::[IRIS 313-11417]	IRIS 313-11417	IRGC 132256	admix	66	C	T	T	-	-	-	C	C	C	T	C	-	-	-	-	C	-	G	C	T	T	-	A	-	G	G	C	T	C	C	A	C	A	G	A	A	G	-	-
PISINI::IRGC 50035-2::[IRIS 313-11420]	IRIS 313-11420	IRGC 128138	ind2	0	A	PISINI::IRGC 50035-2::[IRIS 313-11420]	IRIS 313-11420	IRGC 128138	ind2	54	C	T	T	-	-	-	C	C	C	T	C	-	-	-	-	C	-	G	C	T	T	-			G	G	C	T	C	C	A	C	A	G	A	A
SETO JHINUWA::IRGC 62043-1::[IRIS 313-11632]	IRIS 313-11632	IRGC 128466	aro	0	A	SETO JHINUWA::IRGC 62043-1::[IRIS 313-11632]	IRIS 313-11632	IRGC 128466	aro	76	C	T	T	-	-	-	C	C	C	T	C	-	-	-	-			G	C	T	T	-	A	-	G	G	C	T	C	C	A	C	A	G	A	A	G	-	-
KAKANI 2::IRGC 13373-C1::[IRIS 313-7933]	IRIS 313-7933	IRGC 122128	admix	0	A	KAKANI 2::IRGC 13373-C1::[IRIS 313-7933]	IRIS 313-7933	IRGC 122128	admix	105	C	T	T	-	-	-	C	C	C	T	C	-	-	-	-	A	A	G	C	T	T	-	A	-	G	G	C	T	T/C	C	A	C	A	G	A	A	G	-	-
TAK::IRGC 73124-1::[IRIS 313-8655]	IRIS 313-8655	IRGC 121582	aus	0	A	TAK::IRGC 73124-1::[IRIS 313-8655]	IRIS 313-8655	IRGC 121582	aus	49											C	-	-	-	-	A	A	G	C	T					G	G	C	T	C	C	A	C	A	G	A	A	G	-	-
PANKHARI 203::[IRIS 313-9083]	IRIS 313-9083	IRGC 117551	aro	0	A	PANKHARI 203::[IRIS 313-9083]	IRIS 313-9083	IRGC 117551	aro	46	C	T					C	C	C	T	C	-	-	-	-	C	-								G	G	C	T		C				G
JC 157::[IRIS 313-9629]	IRIS 313-9629	IRGC 117498	aro	0	A	JC 157::[IRIS 313-9629]	IRIS 313-9629	IRGC 117498	aro	93	C	T	T	-	-	-	C	C	C	T	C	-	-	-	-	C	-				T	-			G	G	C	T	C	C	A	C	A	G	A	A	G	-	-
TIKAL 3::IRGC 50649-1::[IRIS 313-9940]	IRIS 313-9940	IRGC 125923	ind1B	0	A	TIKAL 3::IRGC 50649-1::[IRIS 313-9940]	IRIS 313-9940	IRGC 125923	ind1B	51	C	T	T	-	-	-	C	C	C	T	C	-	-	-	-	C	-						A	-	G	G	C	T	C	C				G			G	-	-
IRAT 118::IRGC 55785-1::[IRIS 313-9978]	IRIS 313-9978		aro	0	A	IRAT 118::IRGC 55785-1::[IRIS 313-9978]	IRIS 313-9978		aro	76											C	-	-	-	-	C	-	G	C	T	T	-			G	G	C	T	C	C	A	C	A	G	A	A	G	-	-
TODULI::IRGC 48942-2::[IRIS 313-11398]	IRIS 313-11398	IRGC 128190	ind3	1	C	TODULI::IRGC 48942-2::[IRIS 313-11398]	IRIS 313-11398	IRGC 128190	ind3	84.5	C	T	T	-	-	-	C	C	C	T	C	-	-	-	-	C	-	G	C	T	T	-			G	G	C	T	C	C	A	C	A	G	A	A	G	-	-
HUAGENGXIAN 74::[CX12]	CX12	IRGC 135909	indx	0	A	HUAGENGXIAN 74::[CX12]	CX12	IRGC 135909	indx	53	C	T	T	-	-	-	C	C	C	T	C	-	-	-	-	C	-	G	C	T	T	-			G	G	C	T		C							G	-	-
IRBB60::[CX126]	CX126	IRGC 135946	ind1B	0	A	IRBB60::[CX126]	CX126	IRGC 135946	ind1B	71.5	C	T	T	-	-	-	C	C	C	T	C	-	-	-	-	C	-	G	C	T	C	C	A	-	G	G	C	T	C	C	G/A	T/C	G/A	G	G/A	G/A	G	-	-
IR55419-04::[CX232]	CX232	IRGC 135924	indx	0	A	IR55419-04::[CX232]	CX232	IRGC 135924	indx	61	C	T	T	-	-	-	C	C	C	T	C	-	-	-	-	C	-	G	C	T	T	-															G	-	-
CX413::[CX413]	CX413		ind1B	0	A	CX413::[CX413]	CX413		ind1B	95	C	T	T	-	-	-	C	C	C	T	C	-	-	-	-	A	A	G	C	T	T	-	A	-	G	G	C	T	C	C	A	C	A	G	A	A	G	-	-
PICO NEGRO::IRGC 55849-1::[IRIS 313-10158]	IRIS 313-10158	IRGC 126080	indx	0	A	PICO NEGRO::IRGC 55849-1::[IRIS 313-10158]	IRIS 313-10158	IRGC 126080	indx	99.5	C	T	C	C	C	C	C	C	C	T	C	-	-	-	-	C	-	G	C	T	T	-	A	-	G	G	C	T	C	C	A	C	A	G	A	A	G	-	-
IRGA 318-11-9-2A::IRGC 117340-1::[IRIS 313-10398]	IRIS 313-10398	IRGC 126030	ind1B	0	A	IRGA 318-11-9-2A::IRGC 117340-1::[IRIS 313-10398]	IRIS 313-10398	IRGC 126030	ind1B	85	C	T	T	-	-	-	C	C	C	T	C	-	-	-	-	C	-	G	C	T	T	-	A	-	G	G	C	T	C	C	A	C	A	G	A	A	G	-	-
SR 26 B::IRGC 10803-2::[IRIS 313-10640]	IRIS 313-10640	IRGC 128169	ind2	0	A	SR 26 B::IRGC 10803-2::[IRIS 313-10640]	IRIS 313-10640	IRGC 128169	ind2	42	C	T	T	-	-	-	C	C	C	T	C	-	-	-	-	C	-						A	-	G	G	C	T	C	C	A	C	A	G	A	A	G	-	-
MAMAS::IRGC 16503-1::[IRIS 313-10742]	IRIS 313-10742	IRGC 127600	ind3	0	A	MAMAS::IRGC 16503-1::[IRIS 313-10742]	IRIS 313-10742	IRGC 127600	ind3	64	C	T	T	-	-	-	C	C	C	T	T	T	A	G	A	C	-	G	C	T	T	-	A	-	G	G	C	T	C	C				G		A	G	-	-
NEP BA BONG TO::IRGC 17005-2::[IRIS 313-10755]	IRIS 313-10755	IRGC 128116	ind3	0	A	NEP BA BONG TO::IRGC 17005-2::[IRIS 313-10755]	IRIS 313-10755	IRGC 128116	ind3	64	C	T	T	-	-	-	C	C	C	T	C	-	-	-	-	A	A	G	C	T	T	-	A	-	G	G	C	T	C	C	A	C	A	G	A	A	G	-	-
GOJOT::IRGC 17669-1::[IRIS 313-10772]	IRIS 313-10772	IRGC 127388	ind3	0	A	GOJOT::IRGC 17669-1::[IRIS 313-10772]	IRIS 313-10772	IRGC 127388	ind3	80	C	T	T	-	-	-	C	C	C	T	T	T	A	G	A	C	-				T	-	C	C	G	G	C	T	C	C	A	C	A	G	A	A	G	-	-
PUAK::IRGC 18512-1::[IRIS 313-10804]	IRIS 313-10804	IRGC 135787	ind3	0	A	PUAK::IRGC 18512-1::[IRIS 313-10804]	IRIS 313-10804	IRGC 135787	ind3	80	C	T	C	C	C	C	C	C	C	T	C	-	-	-	-	C	-	G	C	T	T	-			G	G	C	T	C	C	A	C	A	G	A	A	G	-	-
ARC 11777::IRGC 21639-1::[IRIS 313-10871]	IRIS 313-10871	IRGC 127139	aus	0	A	ARC 11777::IRGC 21639-1::[IRIS 313-10871]	IRIS 313-10871	IRGC 127139	aus	132	C	T	C	C	C	C	C	C	C	T	T	T	A	G	A	C	-	G	C	T	T	-	A	-	G	G	C	T	C	C	A	C	A	G	A	A	G	-	-
DAMNOEUB KHSE SAUT::IRGC 22819-2::[IRIS 313-10899]	IRIS 313-10899	IRGC 128025	ind3	0	A	DAMNOEUB KHSE SAUT::IRGC 22819-2::[IRIS 313-10899]	IRIS 313-10899	IRGC 128025	ind3	56	C	T	T	-	-	-	C	C	C	T	C	-	-	-	-	C	-	G	C	T	T	-	A	-	G	G	C	T	C	C	A	C	A	G	A	A	G	-	-
PALAM PURI BAS 137::IRGC 28084-1::[IRIS 313-11032]	IRIS 313-11032	IRGC 127710	aro	0	A	PALAM PURI BAS 137::IRGC 28084-1::[IRIS 313-11032]	IRIS 313-11032	IRGC 127710	aro	85	C	T	T	-	-	-	C	C	C	T	C	-	-	-	-	C	-	G	C	T	T	-	A	-	G	G	C	T	C	C	A	C	A	G	A	A	G	-	-
TUPA::IRGC 29432-1::[IRIS 313-11070]	IRIS 313-11070	IRGC 127239	admix	0	A	TUPA::IRGC 29432-1::[IRIS 313-11070]	IRIS 313-11070	IRGC 127239	admix	67	C	T	T	-	-	-	C	C	C	T	C	-	-	-	-	C	-	G	C	T	T	-			G	G	C	T	C	C				G	A	A	G	-	-
SI RANTING::IRGC 43645-2::[IRIS 313-11317]	IRIS 313-11317	IRGC 128167	ind3	0	A	SI RANTING::IRGC 43645-2::[IRIS 313-11317]	IRIS 313-11317	IRGC 128167	ind3	92	C	T	T	-	-	-	C	C	C	T	T	T	A	G	A	A	A	G	C	T	T	-	C	C	G	G	C	T	C	C	A	C	A	G	A	A	G	-	-
JASURE AUS::IRGC 43860-1::[IRIS 313-11322]	IRIS 313-11322	IRGC 127449	aus	0	A	JASURE AUS::IRGC 43860-1::[IRIS 313-11322]	IRIS 313-11322	IRGC 127449	aus	72	C	T	T	-	-	-	C	C	C	T	C	-	-	-	-	A	A	G	C	T	T	-	A	-	G	G	C	T		C			A	G	A	A	G	-	-
AEB 368 RIP P TYPE ADT::IRGC 49359-2::[IRIS 313-11403]	IRIS 313-11403	IRGC 127923	indx	0	A	AEB 368 RIP P TYPE ADT::IRGC 49359-2::[IRIS 313-11403]	IRIS 313-11403	IRGC 127923	indx	63	C	T	T	-	-	-	C	C	C	T	C	-	-	-	-	C	-	G	C	T	T	-			G	G	C	T	C	C				G		A	G	-	-
KHAO NAHNG PRUNG::IRGC 71220-1::[IRIS 313-11837]	IRIS 313-11837	IRGC 127514	ind3	0	A	KHAO NAHNG PRUNG::IRGC 71220-1::[IRIS 313-11837]	IRIS 313-11837	IRGC 127514	ind3	98.5	C	T	T	-	-	-	C	C	C	T	C	-	-	-	-	C	-						A	-	G	G	C	T	C	C	A	C	A	G			G	-	-
MUAY::IRGC 71318-1::[IRIS 313-11839]	IRIS 313-11839	IRGC 127637	ind3	0	A	MUAY::IRGC 71318-1::[IRIS 313-11839]	IRIS 313-11839	IRGC 127637	ind3	44	C	T	T	-	-	-	C	C	C	T	C	-	-	-	-	C	-								G	G	C	T		C							G	-	-
PAN DAWK MAHK::IRGC 71380-1::[IRIS 313-11843]	IRIS 313-11843	IRGC 132290	ind3	0	A	PAN DAWK MAHK::IRGC 71380-1::[IRIS 313-11843]	IRIS 313-11843	IRGC 132290	ind3	94	C	T	T	-	-	-	C	C	C	T	C	-	-	-	-	C	-	G	C	T	T	-	A	-	G	G	C	T	C	C	A			G	A	A	G	-	-
PUEY TAW::IRGC 71405-1::[IRIS 313-11844]	IRIS 313-11844	IRGC 127745	ind3	0	A	PUEY TAW::IRGC 71405-1::[IRIS 313-11844]	IRIS 313-11844	IRGC 127745	ind3	74	C	T	C	C	C	C	C	C	C	T	C	-	-	-	-	C	-	G	C	T	T	-	A	-	G	G	C	T	C	C				G			G	-	-
PA MATIS::IRGC 77811-1::[IRIS 313-11976]	IRIS 313-11976	IRGC 135577	ind3	0	A	PA MATIS::IRGC 77811-1::[IRIS 313-11976]	IRIS 313-11976	IRGC 135577	ind3	70	C	T	T	-	-	-	C	C	C	T	C	-	-	-	-	C	-													C				G
LAM BOUN::IRGC 91525-1::[IRIS 313-12222]	IRIS 313-12222	IRGC 127548	ind3	0	A	LAM BOUN::IRGC 91525-1::[IRIS 313-12222]	IRIS 313-12222	IRGC 127548	ind3	61	C	T	T	-	-	-	C	C	C	T	C	-	-	-	-	C	-	G	C	T					G	G	C	T	C	C	A	C	A	G	A	A	G	-	-
FEDEARROZ 50::G1::[IRIS 313-15896]	IRIS 313-15896	IRGC 126957	ind1B	0	A	FEDEARROZ 50::G1::[IRIS 313-15896]	IRIS 313-15896	IRGC 126957	ind1B	41.5	C	T	T	-	-	-	C	C	C	T	C	-	-	-	-	C	-	G	C	T	T	-	A	-	G	G	C	T	C					G	A	A	G	-	-
IR 2003-P7-7-4-2::IRGC 32671-1::[IRIS 313-8392]	IRIS 313-8392	IRGC 125970	ind1B	0	A	IR 2003-P7-7-4-2::IRGC 32671-1::[IRIS 313-8392]	IRIS 313-8392	IRGC 125970	ind1B	72	C	T	C	C	C	C	C	C	C	T	T	T	A	G	A	C	-	G	C	T	T	-	A	-	G	G	C	T	C	C	A	C	A	G	A	A	G	-	-
SI HAO NDURIA::IRGC 66649-1::[IRIS 313-8608]	IRIS 313-8608	IRGC 132385	ind3	0	A	SI HAO NDURIA::IRGC 66649-1::[IRIS 313-8608]	IRIS 313-8608	IRGC 132385	ind3	61																		G	C	T	T	-	A	-	G	G	C	T	C	C	A	C	A	G	A	A	G	-	-
RELLY::IRGC 14623-1::[IRIS 313-8812]	IRIS 313-8812	IRGC 126160	ind3	0	A	RELLY::IRGC 14623-1::[IRIS 313-8812]	IRIS 313-8812	IRGC 126160	ind3	53	C	T					C	C	C	T	C	-	-	-	-	C	-	G	C	T	T	-	A	-	G	G	C	T	C	C	A	C	A	G	A	A	G	-	-
TUMBA::IRGC 66681-1::[IRIS 313-9188]	IRIS 313-9188	IRGC 126288	ind3	0	A	TUMBA::IRGC 66681-1::[IRIS 313-9188]	IRIS 313-9188	IRGC 126288	ind3	56.5	C	T	T	-	-	-	C	C	C	T	C	-	-	-	-	A	A	G	C	T	T	-	A	-	G	G	C	T	C	C	A			G	A	A	G	-	-
RPW 9-4 (SS 1)::IRGC 50690-1::[IRIS 313-9522]	IRIS 313-9522	IRGC 126084	indx	0	A	RPW 9-4 (SS 1)::IRGC 50690-1::[IRIS 313-9522]	IRIS 313-9522	IRGC 126084	indx	91	C	T	T	-	-	-	C	C	C	T	C	-	-	-	-	C	-	G	C	T	T	-	A	-	G	G	C	T	C	C				G	A	A	G	-	-
MAE YEU::IRGC 64509-1::[IRIS 313-9575]	IRIS 313-9575	IRGC 131916	ind3	0	A	MAE YEU::IRGC 64509-1::[IRIS 313-9575]	IRIS 313-9575	IRGC 131916	ind3	34	C	T	T	-	-	-	C	C	C	T	C	-	-	-	-	C	-	G	C	T					G	G	C	T		C							G	-	-
MILYANG 30::IRGC 46977-1::[IRIS 313-9925]	IRIS 313-9925	IRGC 125839	ind1B	0	A	MILYANG 30::IRGC 46977-1::[IRIS 313-9925]	IRIS 313-9925	IRGC 125839	ind1B	77	C	T	T	-	-	-	C	C	C	T	C	-	-	-	-	A	A	G	C	T	T	-	A	-	G	G	C	T	C	C				G			G	-	-
LONG GE 33::IRGC 63705-1::[IRIS 313-11666]	IRIS 313-11666	IRGC 127573	indx	0	A	LONG GE 33::IRGC 63705-1::[IRIS 313-11666]	IRIS 313-11666	IRGC 127573	indx	98	C	T	T	-	-	-	C	C	C	T	C	-	-	-	-	A	A	G	C	T	T	-	A	-	G	G	C	T	C	C	A	C	A	G	A	A	G	-	-
KOLITONDO::IRGC 66497-1::[IRIS 313-8681]	IRIS 313-8681		ind3	0	A	KOLITONDO::IRGC 66497-1::[IRIS 313-8681]	IRIS 313-8681		ind3	118.5	C	T	C	C	C	C	C	C	C	T	T	T	A	G	A	A	A	G	C	T	T	-	A	-	G	G	C	T	C	C	A	C	A	G	A		G	-	-
LX2007::[CX303]	CX303	IRGC 135976	indx	0	A	LX2007::[CX303]	CX303	IRGC 135976	indx	125.5	C	T	C	C	C	C	C	C	C	T	C	-	-	-	-	A	A	G	C	T	T	-	C	C	G	G	C	T	C	C	A	C	A	G	A	A	G	-	-
BORIZINA 640::IRGC 68382-1::[IRIS 313-11757]	IRIS 313-11757	IRGC 131972	ind3	0	A	BORIZINA 640::IRGC 68382-1::[IRIS 313-11757]	IRIS 313-11757	IRGC 131972	ind3	63.5	C	T	T	-	-	-	C	C	C	T	C	-	-	-	-	A	A	G	C	T	T	-	A	-	G	G	C	T	T	C	G	T	G	G	G	G	T	T	-
CUNGUNUO::[B223]	B223		temp	0	A	CUNGUNUO::[B223]	B223		temp	101
CHOBO::IRGC 61930-1::[IRIS 313-11625]	IRIS 313-11625	IRGC 127281	aro	0	A	CHOBO::IRGC 61930-1::[IRIS 313-11625]	IRIS 313-11625	IRGC 127281	aro	92.5	C	T	T	-	-	-	C	C	C	T	T	T	A	G	A	C	-	G	C	T	T	-	A	-	G	G	C	T	C	C	A	C	A	G	A	A	G	-	-
PADI TIMBUN::IRGC 13451-1::[IRIS 313-10688]	IRIS 313-10688	IRGC 135782	ind3	0	A	PADI TIMBUN::IRGC 13451-1::[IRIS 313-10688]	IRIS 313-10688	IRGC 135782	ind3	77.5	C	T	T	-	-	-	C	C	C	T	C	-	-	-	-	C	-	G	C	T	T	-	A	-	G	G	C	T	C	C	A	C	A	G	A	A	G	-	-
LUA NEP 4416::IRGC 23006-1::[IRIS 313-10906]	IRIS 313-10906		ind3	0	A	LUA NEP 4416::IRGC 23006-1::[IRIS 313-10906]	IRIS 313-10906		ind3	79.5	C	T	T	-	-	-	C	C	C	T	C	-	-	-	-			G	C	T	T	-	A	-	G	G	C	T	C	C	A	C	A	G	A	A	G	-	-
BASMATI 1::IRGC 27798-1::[IRIS 313-8656]	IRIS 313-8656	IRGC 126046	aro	0	A	BASMATI 1::IRGC 27798-1::[IRIS 313-8656]	IRIS 313-8656	IRGC 126046	aro	80	C	T	T	-	-	-	C	C	C	T	C	-	-	-	-	C	-	G	C	T	T	-			G	G	C	T	C	C				G	A	A	G	-	-
PR106::[CX22]	CX22	IRGC 136022	ind1B	0	A	PR106::[CX22]	CX22	IRGC 136022	ind1B	87.5	C	T	T	-	-	-	C	C	C	T	C	-	-	-	-	C	-	G	C	T	C	C	A	-	G	G	C	T	C	C	A	C	A	G	A	A	G	-	-
UPR 1201-1-20-1::IRGC 117357-1::[IRIS 313-10417]	IRIS 313-10417	IRGC 126012	ind1B	0	A	UPR 1201-1-20-1::IRGC 117357-1::[IRIS 313-10417]	IRIS 313-10417	IRGC 126012	ind1B	54	C	T	T	-	-	-	C	C	C	T	C	-	-	-	-	C	-	G	C	T	T	-	A	-													G	-	-
JIANGHUADAO::[B166]	B166	IRGC 135953	temp	0	A	JIANGHUADAO::[B166]	B166	IRGC 135953	temp	46
108S::[CX5]	CX5		indx	0	A	108S::[CX5]	CX5		indx	50	C	T	T	-	-	-	C	C	C	T						A	A	G	C	T					G	G	C	T	C	C	A	C		G
ICTA CRISPO 38::IRGC 116994-1::[IRIS 313-10274]	IRIS 313-10274	IRGC 125967	ind1B	0	A	ICTA CRISPO 38::IRGC 116994-1::[IRIS 313-10274]	IRIS 313-10274	IRGC 125967	ind1B	32	C	T	T	-	-	-	C	C	C	T	C	-	-	-	-	C	-	G	C	T	T	-	A	-	G	G	C	T	C	C				G			G	-	-
TARING PELUNDUK::IRGC 25821-2::[IRIS 313-10961]	IRIS 313-10961		ind3	0	A	TARING PELUNDUK::IRGC 25821-2::[IRIS 313-10961]	IRIS 313-10961		ind3	102	C	T	T	-	-	-	C	C	C	T	T	T	A	G	A	A	A	G	C	T	T	-	C	C	G	G	C	T	C	C	A	C	A	G	A	A	G	-	-
RANDAH SASAK::IRGC 13652-2::[IRIS 313-10692]	IRIS 313-10692	IRGC 132367	ind3	0	A	RANDAH SASAK::IRGC 13652-2::[IRIS 313-10692]	IRIS 313-10692	IRGC 132367	ind3	66	C	T	T	-	-	-	C	C	C	T	C	-	-	-	-	C	-						A	-	G	G	C	T	C	C	A	C	A	G	A	A	G	-	-
SPR 7284-57-5::IRGC 38649-1::[IRIS 313-11233]	IRIS 313-11233	IRGC 127823	ind1B	0	A	SPR 7284-57-5::IRGC 38649-1::[IRIS 313-11233]	IRIS 313-11233	IRGC 127823	ind1B	59											C	-	-	-	-	C	-						A	-	G	G	C	T	C	C	A	C	A	G	A	A	G	-	-
BR 5230-46-4::IRGC 117318-1::[IRIS 313-10341]	IRIS 313-10341	IRGC 121167	indx	0	A	BR 5230-46-4::IRGC 117318-1::[IRIS 313-10341]	IRIS 313-10341	IRGC 121167	indx	40																C	-						A	-	G	G	C	T	C	C			A	G	A	A	G	-	-
MILAGROSA, ZAWA BANDAY::[CX59]	CX59	IRGC 135983	aro	0	A	MILAGROSA, ZAWA BANDAY::[CX59]	CX59	IRGC 135983	aro	105	C	T	T	-	-	-	C	C	C	T	C	-	-	-	-	A	A	G	C	T	C	C	A	-	G	G	C	T	C	C	A	C	A	G	A	A	G	-	-
LEUANG YAI 29-12-46::IRGC 24397-1::[IRIS 313-9119]	IRIS 313-9119	IRGC 125825	ind3	0	A	LEUANG YAI 29-12-46::IRGC 24397-1::[IRIS 313-9119]	IRIS 313-9119	IRGC 125825	ind3	63											C	-	-	-	-	C	-	G	C	T	T	-	A	-	G	G	C	T	C	C	A	C	A	G	A	A	G	-	-
YAH TOW::IRGC 75191-1::[IRIS 313-11927]	IRIS 313-11927	IRGC 127897	ind3	0	A	YAH TOW::IRGC 75191-1::[IRIS 313-11927]	IRIS 313-11927	IRGC 127897	ind3	58	C	T	T	-	-	-	C	C	C	T	C	-	-	-	-	A	A	G	C	T	T	-	A	-	G	G	C	T	T	C	G	T	G	G	G	G	T	T	-
TI NGI::IRGC 73620-1::[IRIS 313-11901]	IRIS 313-11901	IRGC 132301	ind3	0	A	TI NGI::IRGC 73620-1::[IRIS 313-11901]	IRIS 313-11901	IRGC 132301	ind3	72	C	T	T	-	-	-	C	C	C	T	C	-	-	-	-	C	-	G	C	T			A	-	G	G	C	T	C	C				G			G	-	-
WANXIAN 77::[CX343]	CX343	IRGC 136069	indx	0	A	WANXIAN 77::[CX343]	CX343	IRGC 136069	indx	65	C	T	T	-	-	-	C	C	C	T	C	-	-	-	-	A	A	G	C	T	C	C			G	G	C	T		C	G/A	T/C	G/A	G	G/A	G/A	G	-	-
K 479-2-3::IRGC 117346-1::[IRIS 313-10404]	IRIS 313-10404	IRGC 121003	indx	0	A	K 479-2-3::IRGC 117346-1::[IRIS 313-10404]	IRIS 313-10404	IRGC 121003	indx	89	C	T	C	C	C	C	C	C	C	T	C	-	-	-	-	A	A	G	C	T	T	-	C	C	G	G	C	T	C	C	A	C	A	G	A	A	G	-	-
ARC 7281::IRGC 24252-2::[IRIS 313-10933]	IRIS 313-10933	IRGC 132245	aro	0	A	ARC 7281::IRGC 24252-2::[IRIS 313-10933]	IRIS 313-10933	IRGC 132245	aro	73											C	-	-	-	-	C	-	G	C	T	T	-			G	G	C	T		C	A	C	A	G	A	A	G	-	-
SOLAY GHAT::IRGC 73121-1::[IRIS 313-9695]	IRIS 313-9695	IRGC 131919	aus	0	A	SOLAY GHAT::IRGC 73121-1::[IRIS 313-9695]	IRIS 313-9695	IRGC 131919	aus	81.5	C	T	T	-	-	-	C	C	C	T	C	-	-	-	-	C	-	G	C	T	T	-	A	-	G	G	C	T	C	C	A	C	A	G	A	A	G	-	-
MAK EA NAM::IRGC 30131-2::[IRIS 313-11095]	IRIS 313-11095	IRGC 128104	ind3	0	A	MAK EA NAM::IRGC 30131-2::[IRIS 313-11095]	IRIS 313-11095	IRGC 128104	ind3	63	C	T	T	-	-	-	C	C	C	T	C	-/T	-/A	-/G	-/A	C	-/A	G	C	T	T	-/A	A	-/A	G	G	C	T	T/C	C	G/A	T/C	G/A	G	G/A	G/A	G	-/A	-
BRONDOL PUTIH::IRGC 24541-1::[IRIS 313-10935]	IRIS 313-10935	IRGC 127238	ind3	0	A	BRONDOL PUTIH::IRGC 24541-1::[IRIS 313-10935]	IRIS 313-10935	IRGC 127238	ind3	68.5																C	-	G	C	T	T	-			G	G	C	T	C	C	A	C	A	G	A	A	G	-	-
SEBERANG::[CX147]	CX147		indx	0		SEBERANG::[CX147]	CX147		indx	77.5	C	T	T	-	-	-	C	C	C	T	C	-	-	-	-	A	A	G	C	T	T	-	A	-/C	G	G	C	T		C		T	G	G	G		G	-/C	-
X23::[CX84]	CX84	IRGC 136075	indx	0	A	X23::[CX84]	CX84	IRGC 136075	indx	66.5	C	T	T	-	-	-	C	C	C	T	C	-	-	-	-	C	-	G	C	T	C	C	A	-	G	G	C	T	C	C	A	C	A	G	A	A	G	-	-
MAIRUL::IRGC 27170-1::[IRIS 313-11000]	IRIS 313-11000	IRGC 127591	ind3	0	A	MAIRUL::IRGC 27170-1::[IRIS 313-11000]	IRIS 313-11000	IRGC 127591	ind3	68.5	C	T	C	C	C	C	C	C	C	T	T	T	A	G	A	C	-	G	C	T	T	-	A	-	G	G	C	T	C	C	A	C	A	G	A	A	G	-	-
RANI BHOG::IRGC 35109-1::[IRIS 313-11172]	IRIS 313-11172	IRGC 127762	aus	0	A	RANI BHOG::IRGC 35109-1::[IRIS 313-11172]	IRIS 313-11172	IRGC 127762	aus	48.5	C	T	T	-	-	-	C	C	C	T	C	-	-	-	-	C	-	G	C	T	T	-	A	-	G	G	C	T		C				G	A	A	G	-	-
PA FADAYA::IRGC 58524-1::[IRIS 313-9402]	IRIS 313-9402	IRGC 131944	indx	0	A	PA FADAYA::IRGC 58524-1::[IRIS 313-9402]	IRIS 313-9402	IRGC 131944	indx	100.5	C	T	C	C	C	C	C	C	C	T	C	-	-	-	-	C	-	G	C	T			A	-	G	G	C	T	C	C	A	C	A	G	A	A	G	-	-
IRGA 318-11-6-9-2B::IRGC 117339-1::[IRIS 313-10397]	IRIS 313-10397	IRGC 120991	ind1B	0	A	IRGA 318-11-6-9-2B::IRGC 117339-1::[IRIS 313-10397]	IRIS 313-10397	IRGC 120991	ind1B	85.5	C	T	T	-	-	-	C	C	C	T	C	-	-	-	-	C	-	G	C	T	T	-	C	C	G	G	C	T	C	C	A	C	A	G	A	A	G	-	-
ESCONDE CACHO::IRGC 74305-1::[IRIS 313-11912]	IRIS 313-11912	IRGC 127361	ind3	0	A	ESCONDE CACHO::IRGC 74305-1::[IRIS 313-11912]	IRIS 313-11912	IRGC 127361	ind3	77.5											C	-	-	-	-	C	-	G	C	T	T	-	A	-	G	G	C	T	C	C	A	C	A	G	A	A	G	-	-
ARC 12067::IRGC 21881-1::[IRIS 313-10876]	IRIS 313-10876	IRGC 127142	aus	0	A	ARC 12067::IRGC 21881-1::[IRIS 313-10876]	IRIS 313-10876	IRGC 127142	aus	75	C	T	T	-	-	-	C	C	C	T	C	-	-	-	-	C	-	G	C	T	T	-	A	-	G	G	C	T	C	C	A	C	A	G	A	A	G	-	-
BOW SU SO::IRGC 78237-1::[IRIS 313-9697]	IRIS 313-9697	IRGC 125690	ind3	0.5	A/C	BOW SU SO::IRGC 78237-1::[IRIS 313-9697]	IRIS 313-9697	IRGC 125690	ind3	51.5	C	T	T	-	-	-	C	C	C	T	C	-	-	-	-	C	-	G	C	T	T	-	A	-	G	G	C	T	T/C	C	G/A	T/C	G/A	G	A	G/A	G	-	-
TAIZHONGZAILAI 1/TAIZHONG65::[B159]	B159		indx	0.5	A/C	TAIZHONGZAILAI 1/TAIZHONG65::[B159]	B159		indx	69.5	C	T	T	-/C	-/C	-/C	C	C	C	T	C	-/C	-/C	-/C	-	C	-	G	C	T	T	-	A	-/C	G	G	C	T	T/C	C	A	C	A	G	A	A	G	-/C	-
THAO LOUANG::IRGC 29688-2::[IRIS 313-11081]	IRIS 313-11081	IRGC 128184	ind3	0		THAO LOUANG::IRGC 29688-2::[IRIS 313-11081]	IRIS 313-11081	IRGC 128184	ind3	91.5	C	T	T	-	-	-	C	C	C	T	C	-	-	-	-	A	A	G	C	T	T	-			G	G	C	T	C	C	A	C	A	G	A	A	G	-	-
LAOHONGDAO::[B103]	B103		temp	0	A	LAOHONGDAO::[B103]	B103		temp	85.5	C	T	T	-	-	-	C	C	C	T	C	-	-	-	-	C	-								G	G	C	T
GODADANI::IRGC 60944-1::[IRIS 313-11598]	IRIS 313-11598	IRGC 127387	admix	0.5	A/C	GODADANI::IRGC 60944-1::[IRIS 313-11598]	IRIS 313-11598	IRGC 127387	admix	34	C	T	T	-	-	-	C	C	C	T	C	-	-	-	-	C	-	G	C	T	T	-	A	-	G	G	C	T	T/C	C	G/A	T/C	G/A	G		G/A	G	-	-
ARC 11867::IRGC 40978-1::[IRIS 313-8315]	IRIS 313-8315		indx	0	A	ARC 11867::IRGC 40978-1::[IRIS 313-8315]	IRIS 313-8315		indx	55.5	C	T	T	-	-	-	C	C	C	T	C	-	-	-	-	A	A	G	C	T	T	-	A	-	G	G	C	T	T	C	G	T	G	G	G	G	G	-/T	-
SEQ 93::C1::[IRIS 313-7635]	IRIS 313-7635	IRGC 122247	ind1B	0	A	SEQ 93::C1::[IRIS 313-7635]	IRIS 313-7635	IRGC 122247	ind1B	56	C	T	T	-	-	-	C	C	C	T	C	-	-	-	-	C	-	G	C	T	T	-	A	-	G	G	C	T	C	C	A			G			G	-	-
AMARELO::IRGC 9389-1::[IRIS 313-9814]	IRIS 313-9814	IRGC 121249	temp	0	A	AMARELO::IRGC 9389-1::[IRIS 313-9814]	IRIS 313-9814	IRGC 121249	temp	88.5																					T	-	A	-
EA DAM HANG DOK::IRGC 29698-2::[IRIS 313-11082]	IRIS 313-11082	IRGC 128036	ind3	0	A	EA DAM HANG DOK::IRGC 29698-2::[IRIS 313-11082]	IRIS 313-11082	IRGC 128036	ind3	49	C	T	T	-	-	-	C	C	C	T	C	-	-	-	-	C	-	G	C	T	T	-	A	-	G	G	C	T	T	C	G	T	G	G	G	G	G	-	-
DJ 29::IRGC 8505-1::[IRIS 313-10594]	IRIS 313-10594	IRGC 127322	aus	0	A	DJ 29::IRGC 8505-1::[IRIS 313-10594]	IRIS 313-10594	IRGC 127322	aus	34.5	C	T	T	-	-	-	C	C	C	T	C	-	-	-	-	C	-						A	-	G	G	C	T	T/C	C	G/A	T/C	G/A	G	G/A	G/A	G	-	-
CASIBON::IRGC 589-2::[IRIS 313-10441]	IRIS 313-10441	IRGC 132327	indx	0	A	CASIBON::IRGC 589-2::[IRIS 313-10441]	IRIS 313-10441	IRGC 132327	indx	27.5	C	T	T	-	-	-	C	C	C	T	C	-	-	-	-	C	-	G	C	T	T	-	A	-	G	G	C	T		C	G/A	T/C	G/A	G			G	-	-
SLG1::[CX182]	CX182	IRGC 136047	indx	0	A	SLG1::[CX182]	CX182	IRGC 136047	indx	102.5	C	T	C	C	C	C	C	C	C	T	C	-/T	-/A	-/G	-/A	C	-/T	G	C	T	C	C/T	A	-/T	G	G	C	T	T/C	C	G/A	T/C	A	G	G/A	G/A	G	-/T	-/A
CISANGGARUNG::[CX25]	CX25	IRGC 135867	ind1B	0	A	CISANGGARUNG::[CX25]	CX25	IRGC 135867	ind1B	61	C	T	T	-	-	-	C	C	C	T	C	-	-	-	-	A	A	G	C	T	T	-	A	-	G	G	C	T	T/C	C				G	G/A	G/A	G	-	-
JWR 221::[B146]	B146		ind1B	0	A	JWR 221::[B146]	B146		ind1B	60	C	T	T	-	-	-	C	C	C	T	T	T	A	G	A	C	-	G	C	T	T	-	A	-	G	G	C	T	C	C				G			G	-	-
NAWAN SATHRA BAGAR 344::IRGC 28079-1::[IRIS 313-11031]	IRIS 313-11031	IRGC 128403	aus	0	A	NAWAN SATHRA BAGAR 344::IRGC 28079-1::[IRIS 313-11031]	IRIS 313-11031	IRGC 128403	aus	23.5	C	T	T	-	-	-	C	C	C	T	C	-	-	-	-	C	-	G	C	T	T	-	A	-	G	G	C	T		C				G		G/A	G	-	-
CS94::[CX79]	CX79	IRGC 135873	ind1B	0.5	A/C	CS94::[CX79]	CX79	IRGC 135873	ind1B	33	C	T	T	-	-	-	C	C	C	T	C	-	-	-	-	A	A	G	C	T	T	-	A	-	G	G	C	T		C				G			G	-	-
C 28-16::IRGC 49580-1::[IRIS 313-11410]	IRIS 313-11410	IRGC 132393	indx	0		C 28-16::IRGC 49580-1::[IRIS 313-11410]	IRIS 313-11410	IRGC 132393	indx	52.5	C	T	T	-	-	-	C	C	C	T	C	-	-	-	-	C	-	G	C	T	T	-	A	-	G	G	C	T						G			G	-	-
KHAZAR::[CX27]	CX27	IRGC 135969	indx	0	A	KHAZAR::[CX27]	CX27	IRGC 135969	indx	52.5	C	T	T	-	-	-	C	C	C	T	C	-	-	-	-	C	-	G	C	T	T	-	A	-	G	G	C	T	C	C	A	C	A	G	A	A	G	-	-
LIJIANGXINTUANHEIGU::[CX282]	CX282		japx	0		LIJIANGXINTUANHEIGU::[CX282]	CX282		japx	81.5	C	T	T	-	-	-	C	C	C	T	C	-	-	-	-	C	-	G	C	T	T	-	A	-	G	G	C	T	T								G	-	-
ZIRI::[CX108]	CX108		admix	0	A	ZIRI::[CX108]	CX108		admix	37	C	T	T	-	-	-	C	C	C	T	C	-	-	-	-	C	-	G	C	T	T	-	A	-	G	G	C	T	T/C	C				G	G		G	-	-
93072::[CX4]	CX4		indx	0	A	93072::[CX4]	CX4		indx	31	C	T	T	-/C	-/C	-/C	C	C	C	T	C	-/C	-/C	-/C	-	C	-/A	G	C	T	T	-/A	A	-/A	G	G	C	T		C	G	T	G	G			G	-/A	-
C70::[CX86]	CX86		indx	0	A	C70::[CX86]	CX86		indx	15	C	T	T	-	-	-	C	C	C	T	C	-	-	-	-	C	-	G	C	T	T	-	A	-	G	G	C	T		C	G	T	G	G	G	G	G	-	-
LARONDJAWI::IRGC 13571-2::[IRIS 313-10690]	IRIS 313-10690	IRGC 132350	ind3	0	A	LARONDJAWI::IRGC 13571-2::[IRIS 313-10690]	IRIS 313-10690	IRGC 132350	ind3	17.5	C	T	T	-	-	-	C	C	C	T	C	-	-	-	-	C	-	G	C	T	T	-	A	-	G	G	C	T	T/C	C	G/A	T/C	G/A	G	G/A	G/A	G	-	-
ITA 117::IRGC 75235-1::[IRIS 313-11930]	IRIS 313-11930	IRGC 127444	ind1B	0	A	ITA 117::IRGC 75235-1::[IRIS 313-11930]	IRIS 313-11930	IRGC 127444	ind1B	29.5	C	T	T	-	-	-	C	C	C	T	C	-	-	-	-	C	-/A	G	C	T	T	-/A	A	-/A	G	G	C	T	T/C	C	G/A	T/C	G/A	G	G/A	G/A	G	-/A	-
LEK::IRGC 40199-1::[IRIS 313-8911]	IRIS 313-8911		admix	0	A	LEK::IRGC 40199-1::[IRIS 313-8911]	IRIS 313-8911		admix	32	C	T	T	-	-	-	C	C	C	T	C	-	-	-	-	C	-/A	G	C	T	T	-/A	A	-/A	G	G	C	T		C			G/A	G	G/A	G/A	G	-/A	-
YANGKUM (RED)::[IRIS 313-9404]	IRIS 313-9404	IRGC 117593	admix	0	A	YANGKUM (RED)::[IRIS 313-9404]	IRIS 313-9404	IRGC 117593	admix	13.5	C	T					C	C	C	T	C	-	-	-	-	C	-	G	C	T	T	-	A	-	G	G	C	T		C		T		G			G	-	-
SADRI RICE 1::[CX104]	CX104	IRGC 136037	aro	0	A	SADRI RICE 1::[CX104]	CX104	IRGC 136037	aro	67.5	C	T	T	-	-	-	C	C	C	T	C	-	-	-	-	A	A	G	C	T	T	-	A	-	G	G	C	T	T/C	C	A	C	A	G	A	A	G	-	-
R644::[CX13]	CX13		indx	0	A	R644::[CX13]	CX13		indx	14	C	T	T	-	-	-	C	C	C	T	C	-	-	-	-	C	-	G	C	T	T	-	A	-	G	G	C	T		C	G	T	G	G	G	G
HAOGELAO::[CX367]	CX367		trop	0	A	HAOGELAO::[CX367]	CX367		trop	11.5	C	T	T	-	-	-	C	C	C	T	C	-	-	-	-	C	-	G	C	T	T	-	A	-	G	G	C	T	T	C	G	T	G	G	G	G	G	-	-
ARC 18061::IRGC 47650-1::[IRIS 313-8935]	IRIS 313-8935	IRGC 127034	indx	0	A	ARC 18061::IRGC 47650-1::[IRIS 313-8935]	IRIS 313-8935	IRGC 127034	indx	19.5	C	T	T	-	-	-	C	C	C	T	C	-	-	-	-	C	-/A	G	C	T	T	-/A	A	-/A	G	G	C	T	T	C			G/A	G	G/A	G/A	G	-/A	-
XUGUNUO::[B085]	B085		ind1A	0.5	A/C	XUGUNUO::[B085]	B085		ind1A	21.5	C	T	T	-	-	-	C	C	C	T	C	-	-	-	-	C	-/A	G	C	T	T	-/A	A	-/A	G	G	C	T	T/C	C	G/A	T/C	G/A	G	G/A	G/A	G	-/A	-
YA NONG ZAO 4::IRGC 63908-1::[IRIS 313-10171]	IRIS 313-10171	IRGC 125944	ind1A	0.5	A/C	YA NONG ZAO 4::IRGC 63908-1::[IRIS 313-10171]	IRIS 313-10171	IRGC 125944	ind1A	57.5	C	T	T	-	-	-	C	C	C	T	C	-	-	-	-	A	A	G	C	T	T	-	A	-	G	G	C	T	T/C	C	G/A	T/C	G/A	G	G/A	G/A	G	-/T	-
ARC 18325::IRGC 42399-1::[IRIS 313-11286]	IRIS 313-11286	IRGC 135736	indx	0.5	A/C	ARC 18325::IRGC 42399-1::[IRIS 313-11286]	IRIS 313-11286	IRGC 135736	indx	33.5	C	T	T	-	-	-	C	C	C	T	C	-	-	-	-	A	A	G	C	T	T	-	A	-	G	G	C	T		C	G	T	G	G			G	-	-
E 4197::IRGC 68004-1::[IRIS 313-11747]	IRIS 313-11747	IRGC 127350	indx	0.5	A/C	E 4197::IRGC 68004-1::[IRIS 313-11747]	IRIS 313-11747	IRGC 127350	indx	50	C	T	T	-/C	-/C	-/C	C	C	C	T	C	-/C	-/C	-/C	-	A	A	G	C	T	T	-	A	-	G	G	C	T	T/C	C			G/A	G	G/A	G/A	G	-/T	-/T
CHAN LEUY::IRGC 81223-1::[IRIS 313-12036]	IRIS 313-12036	IRGC 132277	ind3	0.5	A/C	CHAN LEUY::IRGC 81223-1::[IRIS 313-12036]	IRIS 313-12036	IRGC 132277	ind3	33	C	T	T	-	-	-	C	C	C	T	C	-	-	-	-	C	-	G	C	T	T	-	A	-						C				G			G	-	-
KHAO PONG AEV::IRGC 29820-1::[IRIS 313-9198]	IRIS 313-9198		ind3	0.5	A/C	KHAO PONG AEV::IRGC 29820-1::[IRIS 313-9198]	IRIS 313-9198		ind3	32.5	C	T	T	-	-	-	C	C	C	T	C	-	-	-	-	A	A	G	C	T	T	-	A	-	G	G	C	T	T	C	G	T	G	G	G	G	G	-/T	-
C 1 6-5-2::IRGC 10669-1::[IRIS 313-9818]	IRIS 313-9818	IRGC 126147	admix	0		C 1 6-5-2::IRGC 10669-1::[IRIS 313-9818]	IRIS 313-9818	IRGC 126147	admix	41.5	C	T					C	C	C	T	C	-	-	-	-	A	A	G	C	T	T	-	A	-	G	G	C	T		C				G			G	-	-
IR 4535-PP 23-6-8-1::IRGC 40402-2::[IRIS 313-11249]	IRIS 313-11249	IRGC 132341	indx	0.5	A/C	IR 4535-PP 23-6-8-1::IRGC 40402-2::[IRIS 313-11249]	IRIS 313-11249	IRGC 132341	indx	36	C	T	T	-	-	-	C	C	C	T	C	-	-	-	-	C	-	G	C	T	T	-	A	-	G	G	C	T		C				G			G	-	-
IR 661-1::[B139]	B139		indx	0	A	IR 661-1::[B139]	B139		indx	38	C	T	T	-/C	-/C	-/C	C	C	C	T	C	-/C	-/C	-/C	-	C	-/A	G	C	T	T	-/A	A	-/A	G	G	C	T	T/C	C				G			G	-/A	-
SUKARADJA::IRGC 18936-1::[IRIS 313-9242]	IRIS 313-9242		admix	0	A	SUKARADJA::IRGC 18936-1::[IRIS 313-9242]	IRIS 313-9242		admix	24.5	C	T	T	-	-	-	C	C	C	T	C	-	-	-	-	C	-	G	C	T	T	-	A	-	G	G	C	T	T/C	C	G/A	T/C	G/A	G	G/A	G/A	G	-	-
MR167::[CX69]	CX69	IRGC 135990	indx	0.5	A/C	MR167::[CX69]	CX69	IRGC 135990	indx	29.5	C	T	T	-	-	-	C	C	C	T	C	-	-	-	-	A	A	G	C	T	T	-	A	-	G	G	C	T	T	C	G	T	G	G	G	G	T	T	-
MEDUSA::GERVEX 323-C1::[IRIS 313-8067]	IRIS 313-8067	IRGC 122165	ind1B	0.5	A/C	MEDUSA::GERVEX 323-C1::[IRIS 313-8067]	IRIS 313-8067	IRGC 122165	ind1B	15.5	C	T	T	-	-	-	C	C	C	T	C	-	-	-	-	C	-	G	C	T	T	-	A	-	G	G	C	T	T	C	G	T	G	G	G	G	G	-	-
SONAPATNAI::IRGC 46695-1::[IRIS 313-9120]	IRIS 313-9120	IRGC 125905	admix	0.5	A/C	SONAPATNAI::IRGC 46695-1::[IRIS 313-9120]	IRIS 313-9120	IRGC 125905	admix	36.5	C	T	T	-	-	-	C	C	C	T	C	-	-	-	-	A	A	G	C	T	T	-	A	-	G	G	C	T		C	G	T	G	G	G/A	G/A	G	-	-
KAUSHI::IRGC 49789-1::[IRIS 313-11415]	IRIS 313-11415		admix	0	A	KAUSHI::IRGC 49789-1::[IRIS 313-11415]	IRIS 313-11415		admix	32	C	T	T	-	-	-	C	C	C	T	C	-	-	-	-	C	-				T	-	A	-	G	G	C	T		C	A	C	A	G	A	A	G	-	-
QB_604::[CX210]	CX210	IRGC 136028	admix	0	A	QB_604::[CX210]	CX210	IRGC 136028	admix	7	C	T	T	-	-	-	C	C	C	T	C	-	-	-	-	C	-	G	C	T	T	-	A	-	G	G	C	T		C	G	T		G			G	-	-
KHAO PA SIEV::IRGC 30063-1::[IRIS 313-11092]	IRIS 313-11092	IRGC 127516	admix	0	A	KHAO PA SIEV::IRGC 30063-1::[IRIS 313-11092]	IRIS 313-11092	IRGC 127516	admix	18	C	T	T	-	-	-	C	C	C	T	C	-	-	-	-	C	-	G	C	T	T	-	A	-	G	G	C	T	T/C	C							G	-	-
ANNONGWANGENG B::[B250]	B250		temp	0	A	ANNONGWANGENG B::[B250]	B250		temp	2	C	T	T	-	-	-	C	C	C	T	C	-	-	-	-	C	-	G	C	T	T	-	A	-	G	G	C	T	T	C	G	T	G	G	G	G	G	-	-
KARISHNABELI::IRGC 61979-1::[IRIS 313-11628]	IRIS 313-11628	IRGC 127494	admix	0	A	KARISHNABELI::IRGC 61979-1::[IRIS 313-11628]	IRIS 313-11628	IRGC 127494	admix	10.5	C	T	T	-	-	-	C	C	C	T	C	-	-	-	-	A	A	G	C	T	T	-	A	-	G	G	C	T	T	C	G	T	G	G	G	G	G	-	-
DENG PEE::IRGC 94991-1::[IRIS 313-12257]	IRIS 313-12257	IRGC 128276	subtrop	0	A	DENG PEE::IRGC 94991-1::[IRIS 313-12257]	IRIS 313-12257	IRGC 128276	subtrop	17	C	T	T	-	-	-	C	C	C	T	C	-	-	-	-	A	A	G	C	T	T	-	A	-	G	G	C	T			G	T	G	G	G	G	G	-	-
PODAO::IRGC 44701-1::[IRIS 313-11342]	IRIS 313-11342		indx	0.5	A/C	PODAO::IRGC 44701-1::[IRIS 313-11342]	IRIS 313-11342		indx	10	C	T	T	-	-	-	C	C	C	T	C	-	-	-	-	C	-	G	C	T	T	-	A	-	G	G	C	T	T	C	G	T	G	G	G	G	G	-	-
WANLIXIAN::[B130]	B130		ind1A	1	C	WANLIXIAN::[B130]	B130		ind1A	11.5	C	T	T	-	-	-	C	C	C	T	C	-	-	-	-			G	C	T	T	-	A	-	G	G	C	T	T	C	G	T	G	G	G	G	G	-/T	-/T
KADAMSAIL::IRGC 37468-2::[IRIS 313-11211]	IRIS 313-11211	IRGC 128063	ind2	1	C	KADAMSAIL::IRGC 37468-2::[IRIS 313-11211]	IRIS 313-11211	IRGC 128063	ind2	15	C	T	T	-	-	-	C	C	C	T	C	-	-	-	-	C	-	G	C	T	T	-	A	-	G	G	C	T	T	C	G	T	G	G	G	G	G	-	-
IR 75870-5-8-5-B-1::IRGC 117297-1::[IRIS 313-10385]	IRIS 313-10385	IRGC 126062	ind1B	1	C	IR 75870-5-8-5-B-1::IRGC 117297-1::[IRIS 313-10385]	IRIS 313-10385	IRGC 126062	ind1B	13	C	T	T	-	-	-	C	C	C	T	C	-	-	-	-	A	A	G	C	T	T	-	A	-	G	G	C	T	T	C	G	T	G	G	G	G	G	-	-
IRGA 370-38-1-1F-C4-2::IRGC 117342-1::[IRIS 313-10400]	IRIS 313-10400	IRGC 125988	ind1B	1	C	IRGA 370-38-1-1F-C4-2::IRGC 117342-1::[IRIS 313-10400]	IRIS 313-10400	IRGC 125988	ind1B	15	C	T	T	-	-	-	C	C	C	T	C	-	-	-	-	A	A	G	C	T	T	-	A	-	G	G	C	T	T	C	G	T	G	G	G	G	G	-	-
CODE NO 31225::IRGC 46865-2::[IRIS 313-11375]	IRIS 313-11375	IRGC 128018	aro	1	C	CODE NO 31225::IRGC 46865-2::[IRIS 313-11375]	IRIS 313-11375	IRGC 128018	aro	14	C	T	T	-	-	-	C	C	C	T	C	-	-	-	-	A	A	G	C	T	T	-	A	-	G	G	C	T	T	C	G	T	G	G	G	G	G	-	-
CUTTACK 29::IRGC 49573-1::[IRIS 313-11409]	IRIS 313-11409	IRGC 127289	ind2	1	C	CUTTACK 29::IRGC 49573-1::[IRIS 313-11409]	IRIS 313-11409	IRGC 127289	ind2	13	C	T	T	-	-	-	C	C	C	T	C	-	-	-	-	A	A	G	C	T	T	-	A	-	G	G	C	T	T	C	G	T	G	G	G	G	T	T	T
MOROM::IRGC 23016-2::[IRIS 313-10908]	IRIS 313-10908	IRGC 128112	ind3	0	A	MOROM::IRGC 23016-2::[IRIS 313-10908]	IRIS 313-10908	IRGC 128112	ind3	19	C	T	T	-	-	-	C	C	C	T	C	-	-	-	-	A	A	G	C	T	T	-	A	-	G	G	C	T	T	C	G	T	G	G	G	G	G	-	-
NEANG CHAN::IRGC 23034-1::[IRIS 313-10909]	IRIS 313-10909	IRGC 135776	ind3	0	A	NEANG CHAN::IRGC 23034-1::[IRIS 313-10909]	IRIS 313-10909	IRGC 135776	ind3	23	C	T	T	-	-	-	C	C	C	T	C	-	-	-	-	A	A	G	C	T	T	-	A	-	G	G	C	T	T	C	G	T	G	G	G	G	G	-	-
SENIA::IRGC 74582-1::[IRIS 313-10084]	IRIS 313-10084	IRGC 125899	temp	0	A	SENIA::IRGC 74582-1::[IRIS 313-10084]	IRIS 313-10084	IRGC 125899	temp	0	C	T	T	-	-	-	C	C	C	T	C	-	-	-	-	C	-	G	C	T	T	-	A	-	G	G	C	T	T	C	G	T	G	G	G	G	G	-	-
NORIN 21::IRGC 493-1::[IRIS 313-10437]	IRIS 313-10437	IRGC 128409	temp	0	A	NORIN 21::IRGC 493-1::[IRIS 313-10437]	IRIS 313-10437	IRGC 128409	temp	1	C	T	T	-	-	-	C	C	C	T	C	-	-	-	-	C	-	G	C	T	T	-	A	-	G	G	C	T	T	C	G	T	G	G	G	G	G	-	-
7 AC::IRGC 14860-2::[IRIS 313-10711]	IRIS 313-10711	IRGC 132314	trop	0	A	7 AC::IRGC 14860-2::[IRIS 313-10711]	IRIS 313-10711	IRGC 132314	trop	1	C	T	T	-	-	-	C	C	C	T	C	-	-	-	-	C	-	G	C	T	T	-	A	-	G	G	C	T	T	C	G	T	G	G	G	G	G	-	-
ZAOSHENGBAI::[B003]	B003	IRGC 136088	japx	0	A	ZAOSHENGBAI::[B003]	B003	IRGC 136088	japx	0.5	C	T	T	-	-	-	C	C	C	T	C	-	-	-	-	C	-	G	C	T	T	-	A	-	G	G	C	T	T	C	G	T	G	G	G	G	G	-	-
GAOLIQIU::[B023]	B023	IRGC 135891	temp	0	A	GAOLIQIU::[B023]	B023	IRGC 135891	temp	0.5	C	T	T	-	-	-	C	C	C	T	C	-	-	-	-	C	-	G	C	T	T	-	A	-	G	G	C	T	T	C	G	T	G	G	G	G	G	-	-
MUXIQIU::[B071]	B071		temp	0	A	MUXIQIU::[B071]	B071		temp	0	C	T	T	-	-	-	C	C	C	T	C	-	-	-	-	C	-	G	C	T	T	-	A	-	G	G	C	T	T	C	G	T	G	G	G	G	G	-	-
SAL BUI BAO::[CX106]	CX106	IRGC 136040	trop	0	A	SAL BUI BAO::[CX106]	CX106	IRGC 136040	trop	7.5	C	T	T	-	-	-	C	C	C	T	C	-	-	-	-	C	-/A	G	C	T	T	-/A	A	-/A	G	G	C	T	T	C	G	T	G	G	G	G	G	-/A	-
CHENNONG 89366::[CX213]	CX213		temp	0	A	CHENNONG 89366::[CX213]	CX213		temp	2.5	C	T	T	-	-	-	C	C	C	T	C	-	-	-	-	C	-/A	G	C	T	T	-/A	A	-/A	G	G	C	T	T	C	G	T	G	G	G	G	G	-/A	-
MR19::[CX317]	CX317	IRGC 135992	temp	0	A	MR19::[CX317]	CX317	IRGC 135992	temp	0.5	C	T	T	-	-	-	C	C	C	T	C	-	-	-	-	C	-	G	C	T	T	-	A	-	G	G	C	T	T	C	G	T	G	G	G	G	G	-	-
TSIVIMBININA::IRGC 69890-1::[IRIS 313-10051]	IRIS 313-10051	IRGC 127067	trop	0	A	TSIVIMBININA::IRGC 69890-1::[IRIS 313-10051]	IRIS 313-10051	IRGC 127067	trop	0	C	T	T	-	-	-	C	C	C	T	C	-	-	-	-	C	-	G	C	T	T	-	A	-	G	G	C	T	T	C	G	T	G	G	G	G	G	-	-
KARIA::IRGC 6702-1::[IRIS 313-10545]	IRIS 313-10545	IRGC 127492	aus	0	A	KARIA::IRGC 6702-1::[IRIS 313-10545]	IRIS 313-10545	IRGC 127492	aus	3	C	T	T	-	-	-	C	C	C	T	C	-	-	-	-			G	C	T	T	-	A	-	G	G	C	T	T	C	G	T	G	G	G	G	G	-	-
RATUA 81::IRGC 6829-1::[IRIS 313-10549]	IRIS 313-10549	IRGC 132039	aus	0	A	RATUA 81::IRGC 6829-1::[IRIS 313-10549]	IRIS 313-10549	IRGC 132039	aus	5	C	T	T	-	-	-	C	C	C	T	C	-	-	-	-	C	-	G	C	T	T	-	A	-	G	G	C	T	T	C	G	T	G	G	G	G	T	T	-
RERM BILASH::IRGC 16273-2::[IRIS 313-10736]	IRIS 313-10736	IRGC 128149	aus	0	A	RERM BILASH::IRGC 16273-2::[IRIS 313-10736]	IRIS 313-10736	IRGC 128149	aus	5	C	T	T	-	-	-	C	C	C	T	C	-	-	-	-	C	-	G	C	T	T	-	A	-	G	G	C	T	T	C	G	T	G	G	G	G	T	T	-
PERUNEL 0-69-18::IRGC 19581-1::[IRIS 313-10835]	IRIS 313-10835	IRGC 127727	ind2	0	A	PERUNEL 0-69-18::IRGC 19581-1::[IRIS 313-10835]	IRIS 313-10835	IRGC 127727	ind2	22	C	T	T	-	-	-	C	C	C	T	C	-	-	-	-	A	A	G	C	T	T	-	A	-	G	G	C	T	T	C	G	T	G	G	G	G	G	-	-
ARC 11802::IRGC 21662-2::[IRIS 313-10872]	IRIS 313-10872	IRGC 132421	japx	0	A	ARC 11802::IRGC 21662-2::[IRIS 313-10872]	IRIS 313-10872	IRGC 132421	japx	0.5	C	T	T	-	-	-	C	C	C	T	C	-	-	-	-	C	-	G	C	T	T	-	A	-	G	G	C	T	T	C	G	T	G	G	G	G	G	-	-
D 4-193::IRGC 31083-2::[IRIS 313-11106]	IRIS 313-11106	IRGC 132330	trop	0	A	D 4-193::IRGC 31083-2::[IRIS 313-11106]	IRIS 313-11106	IRGC 132330	trop	0	C	T	T	-	-	-	C	C	C	T	C	-	-	-	-	C	-	G	C	T	T	-	A	-	G	G	C	T	T	C	G	T	G	G	G	G	G	-	-
SAITA::IRGC 31618-1::[IRIS 313-11111]	IRIS 313-11111	IRGC 127778	aus	0	A	SAITA::IRGC 31618-1::[IRIS 313-11111]	IRIS 313-11111	IRGC 127778	aus	1	C	T	T	-	-	-	C	C	C	T	C	-	-	-	-	C	-	G	C	T	T	-	A	-	G	G	C	T	T	C	G	T	G	G	G	G	G	-	-
BAZAIL 975::IRGC 32816-2::[IRIS 313-11123]	IRIS 313-11123	IRGC 127990	aus	0	A	BAZAIL 975::IRGC 32816-2::[IRIS 313-11123]	IRIS 313-11123	IRGC 127990	aus	4	C	T	T	-	-	-	C	C	C	T	C	-	-	-	-	C	-	G	C	T	T	-	A	-	G	G	C	T	T	C	G	T	G	G	G	G	G	-	-
BAK TULSI::IRGC 34831-1::[IRIS 313-11164]	IRIS 313-11164	IRGC 127205	aus	0	A	BAK TULSI::IRGC 34831-1::[IRIS 313-11164]	IRIS 313-11164	IRGC 127205	aus	4	C	T	T	-	-	-	C	C	C	T	C	-	-	-	-	C	-	G	C	T	T	-	A	-	G	G	C	T	T	C	G	T	G	G	G	G	G	-	-
7516-14::IRGC 40090-3::[IRIS 313-11246]	IRIS 313-11246	IRGC 132271	temp	0	A	7516-14::IRGC 40090-3::[IRIS 313-11246]	IRIS 313-11246	IRGC 132271	temp	0	C	T	T	-	-	-	C	C	C	T	C	-	-	-	-	C	-	G	C	T	T	-	A	-	G	G	C	T	T	C	G	T	G	G	G	G	G	-	-
ARC 7056::IRGC 40914-1::[IRIS 313-11255]	IRIS 313-11255	IRGC 127167	indx	0	A	ARC 7056::IRGC 40914-1::[IRIS 313-11255]	IRIS 313-11255	IRGC 127167	indx	4	C	T	T	-	-	-	C	C	C	T	C	-	-	-	-	C	-	G	C	T	T	-	A	-	G	G	C	T	T	C	G	T	G	G	G	G	G	-	-
ARC 13544::IRGC 42743-1::[IRIS 313-11298]	IRIS 313-11298	IRGC 127152	aus	0	A	ARC 13544::IRGC 42743-1::[IRIS 313-11298]	IRIS 313-11298	IRGC 127152	aus	13.5	C	T	T	-	-	-	C	C	C	T	C	-	-	-	-	C	-	G	C	T	T	-	A	-	G	G	C	T	T	C	G	T	G	G	G	G	T	T	-
CIRAD 403::GERVEX 9039-C1::[IRIS 313-7863]	IRIS 313-7863	IRGC 122014	trop	0	A	CIRAD 403::GERVEX 9039-C1::[IRIS 313-7863]	IRIS 313-7863	IRGC 122014	trop	0	C	T	T	-	-	-	C	C	C	T	C	-	-	-	-	C	-	G	C	T	T	-	A	-	G	G	C	T	T	C	G	T	G	G	G	G	G	-	-
IRAT 234::C1::[IRIS 313-7922]	IRIS 313-7922	IRGC 122119	trop	0	A	IRAT 234::C1::[IRIS 313-7922]	IRIS 313-7922	IRGC 122119	trop	0	C	T	T	-	-	-	C	C	C	T	C	-	-	-	-	C	-	G	C	T	T	-	A	-	G	G	C	T	T	C	G	T	G	G	G	G	G	-	-
GHIBLI::GERVEX 187-C1::[IRIS 313-8066]	IRIS 313-8066	IRGC 122053	temp	0	A	GHIBLI::GERVEX 187-C1::[IRIS 313-8066]	IRIS 313-8066	IRGC 122053	temp	0	C	T	T	-	-	-	C	C	C	T	C	-	-	-	-	C	-	G	C	T	T	-	A	-	G	G	C	T	T	C	G	T	G	G	G	G	G	-	-
REXARK ROGUE::IRGC 1972-1::[IRIS 313-8323]	IRIS 313-8323		trop	0	A	REXARK ROGUE::IRGC 1972-1::[IRIS 313-8323]	IRIS 313-8323		trop	0.5	C	T	T	-	-	-	C	C	C	T	C	-	-	-	-	C	-	G	C	T	T	-	A	-	G	G	C	T	T	C	G	T	G	G	G	G	G	-	-
BALINGMI::IRGC 62156-1::[IRIS 313-8637]	IRIS 313-8637	IRGC 126179	subtrop	0	A	BALINGMI::IRGC 62156-1::[IRIS 313-8637]	IRIS 313-8637	IRGC 126179	subtrop	0	C	T	T	-	-	-	C	C	C	T	C	-	-	-	-	C	-	G	C	T	T	-	A	-	G	G	C	T	T	C	G	T	G	G	G	G	G	-	-
JANA (NAM)::IRGC 64897-1::[IRIS 313-8815]	IRIS 313-8815	IRGC 125780	subtrop	0	A	JANA (NAM)::IRGC 64897-1::[IRIS 313-8815]	IRIS 313-8815	IRGC 125780	subtrop	0	C	T	T	-	-	-	C	C	C	T	C	-	-	-	-	C	-	G	C	T	T	-	A	-	G	G	C	T	T	C	G	T	G	G	G	G	G	-	-
ARC 11626::IRGC 21528-1::[IRIS 313-9392]	IRIS 313-9392	IRGC 125642	admix	0	A	ARC 11626::IRGC 21528-1::[IRIS 313-9392]	IRIS 313-9392	IRGC 125642	admix	0	C	T	T	-	-	-	C	C	C	T	C	-	-	-	-	C	-	G	C	T	T	-	A	-	G	G	C	T	T	C	G	T	G	G	G	G	G	-	-
LENJA MURALI::IRGC 66815-1::[IRIS 313-9661]	IRIS 313-9661	IRGC 121038	aus	0	A	LENJA MURALI::IRGC 66815-1::[IRIS 313-9661]	IRIS 313-9661	IRGC 121038	aus	15.5	C	T	T	-	-	-	C	C	C	T	C	-	-	-	-	C	-	G	C	T	T	-	A	-	G	G	C	T	T	C	G	T	G	G	G	G	T	T	-
LOHAMBITRO::IRGC 69857-1::[IRIS 313-9742]	IRIS 313-9742	IRGC 127080	trop	0	A	LOHAMBITRO::IRGC 69857-1::[IRIS 313-9742]	IRIS 313-9742	IRGC 127080	trop	0	C	T	T	-	-	-	C	C	C	T	C	-	-	-	-	C	-	G	C	T	T	-	A	-	G	G	C	T	T	C	G	T	G	G	G	G	G	-	-
MOUSOIR::IRGC 15866-1::[IRIS 313-10724]	IRIS 313-10724		ind3	1	C	MOUSOIR::IRGC 15866-1::[IRIS 313-10724]	IRIS 313-10724		ind3	12	C	T	T	-	-	-	C	C	C	T	C	-	-	-	-	C	-	G	C	T	T	-	A	-	G	G	C	T	T	C	G	T	G	G	G	G	G	-	-
BUBAW::IRGC 32989-2::[IRIS 313-11127]	IRIS 313-11127	IRGC 132307	subtrop	0	A	BUBAW::IRGC 32989-2::[IRIS 313-11127]	IRIS 313-11127	IRGC 132307	subtrop	16	C	T	T	-	-	-	C	C	C	T	C	-	-	-	-	C	-	G	C	T	T	-	A	-	G	G	C	T	T	C	G	T	G	G	G	G	G	-	-
JALADHI 1::IRGC 45858-2::[IRIS 313-11360]	IRIS 313-11360	IRGC 132342	aro	0	A	JALADHI 1::IRGC 45858-2::[IRIS 313-11360]	IRIS 313-11360	IRGC 132342	aro	8	C	T	T	-	-	-	C	C	C	T	C	-	-	-	-	C	-	G	C	T	T	-	A	-	G	G	C	T	T	C	G	T	G	G	G	G	T	T	-
N'YA NOFF::IRGC 69749-1::[IRIS 313-11786]	IRIS 313-11786	IRGC 128411	ind3	0	A	N'YA NOFF::IRGC 69749-1::[IRIS 313-11786]	IRIS 313-11786	IRGC 128411	ind3	22	C	T	T	-	-	-	C	C	C	T	C	-	-	-	-	A	A	G	C	T	T	-	A	-	G	G	C	T	T	C	G	T	G	G	G	G	G	-	-
IRAT 112::C1::[IRIS 313-7914]	IRIS 313-7914	IRGC 122115	trop	0	A	IRAT 112::C1::[IRIS 313-7914]	IRIS 313-7914	IRGC 122115	trop	0	C	T	T	-	-	-	C	C	C	T	C	-	-	-	-	C	-	G	C	T	T	-	A	-	G	G	C	T	T	C	G	T	G	G	G	G	G	-	-
TIANHANDAO::[B007]	B007	IRGC 136055	indx	1	C	TIANHANDAO::[B007]	B007	IRGC 136055	indx	18	C	T	T	-	-	-	C	C	C	T	C	-	-	-	-	A	A	G	C	T	T	-	A	-	G	G	C	T	T	C	G	T	G	G	G	G	G	-	-
SANTIANNUO::[B044]	B044	IRGC 136042	indx	1	C	SANTIANNUO::[B044]	B044	IRGC 136042	indx	2	C	T	T	-	-	-	C	C	C	T	C	-	-	-	-	C	-	G	C	T	T	-	A	-	G	G	C	T	T	C	G	T	G	G	G	G	G	-	-
XIAOHONGGU::[B091]	B091		indx	1	C	XIAOHONGGU::[B091]	B091		indx	18	C	T	T	-	-	-	C	C	C	T	C	-	-	-	-	A	A	G	C	T	T	-	A	-	G	G	C	T	T	C	G	T	G	G	G	G	G	-	-
BA BAI GU::IRGC 79580-1::[IRIS 313-10221]	IRIS 313-10221	IRGC 125663	indx	1	C	BA BAI GU::IRGC 79580-1::[IRIS 313-10221]	IRIS 313-10221	IRGC 125663	indx	13	C	T	T	-	-	-	C	C	C	T	C	-	-	-	-	A	A	G	C	T	T	-	A	-	G	G	C	T	T	C	G	T	G	G	G	G	G	-	-
PACHCHAIPERUMAL 2462-11::IRGC 3474-1::[IRIS 313-10476]	IRIS 313-10476	IRGC 127698	ind2	1	C	PACHCHAIPERUMAL 2462-11::IRGC 3474-1::[IRIS 313-10476]	IRIS 313-10476	IRGC 127698	ind2	14	C	T	T	-	-	-	C	C	C	T	C	-	-	-	-	C	-	G	C	T	T	-	A	-	G	G	C	T	T	C	G	T	G	G	G	G	G	-	-
YEBAW::IRGC 33875-2::[IRIS 313-11148]	IRIS 313-11148	IRGC 128203	ind3	1	C	YEBAW::IRGC 33875-2::[IRIS 313-11148]	IRIS 313-11148	IRGC 128203	ind3	4	C	T	T	-	-	-	C	C	C	T	C	-	-	-	-	C	-	G	C	T	T	-	A	-	G	G	C	T	T	C	G	T	G	G	G	G	G	-	-
PARIJAT::IRGC 37272-2::[IRIS 313-11208]	IRIS 313-11208	IRGC 128129	indx	1	C	PARIJAT::IRGC 37272-2::[IRIS 313-11208]	IRIS 313-11208	IRGC 128129	indx	12	C	T	T	-	-	-	C	C	C	T	C	-	-	-	-	C	-	G	C	T	T	-	A	-	G	G	C	T	T	C	G	T	G	G	G	G	G	-	-
ARC 14709::IRGC 42976-2::[IRIS 313-11300]	IRIS 313-11300	IRGC 127960	ind2	1	C	ARC 14709::IRGC 42976-2::[IRIS 313-11300]	IRIS 313-11300	IRGC 127960	ind2	15	C	T	T	-	-	-	C	C	C	T	C	-	-	-	-	A	A	G	C	T	T	-	A	-	G	G	C	T	T	C	G	T	G	G	G	G	G	-	-
BARAMANJ::IRGC 52067-1::[IRIS 313-11448]	IRIS 313-11448	IRGC 127209	ind2	1	C	BARAMANJ::IRGC 52067-1::[IRIS 313-11448]	IRIS 313-11448	IRGC 127209	ind2	13	C	T	T	-	-	-	C	C	C	T	C	-	-	-	-	A	A	G	C	T	T	-	A	-	G	G	C	T	T	C	G	T	G	G	G	G	G	-	-
CHAN THANH HOA::IRGC 60647-1::[IRIS 313-11594]	IRIS 313-11594	IRGC 127259	indx	1	C	CHAN THANH HOA::IRGC 60647-1::[IRIS 313-11594]	IRIS 313-11594	IRGC 127259	indx	16	C	T	T	-	-	-	C	C	C	T	C	-	-	-	-	A	A	G	C	T	T	-	A	-	G	G	C	T	T	C	G	T	G	G	G	G	G	-	-
DAU NGHA THAI BINH::IRGC 82891-1::[IRIS 313-12078]	IRIS 313-12078	IRGC 127301	indx	1	C	DAU NGHA THAI BINH::IRGC 82891-1::[IRIS 313-12078]	IRIS 313-12078	IRGC 127301	indx	1	C	T	T	-	-	-	C	C	C	T	C	-	-	-	-	C	-	G	C	T	T	-	A	-	G	G	C	T	T	C	G	T	G	G	G	G	G	-	-
SOM CAU 70 A::IRGC 8227-C1::[IRIS 313-7778]	IRIS 313-7778	IRGC 122254	indx	1	C	SOM CAU 70 A::IRGC 8227-C1::[IRIS 313-7778]	IRIS 313-7778	IRGC 122254	indx	6	C	T	T	-	-	-	C	C	C	T	C	-	-	-	-	C	-	G	C	T	T	-	A	-	G	G	C	T	T	C	G	T	G	G	G	G	T	T	T
RACE PERUMAL::IRGC 55347-1::[IRIS 313-9970]	IRIS 313-9970	IRGC 125881	ind2	1	C	RACE PERUMAL::IRGC 55347-1::[IRIS 313-9970]	IRIS 313-9970	IRGC 125881	ind2	21	C	T	T	-	-	-	C	C	C	T	C	-	-	-	-	A	A	G	C	T	T	-	A	-	G	G	C	T	T	C	G	T	G	G	G	G	G	-	-
QIUGUANGTENGXI 104::[B004]	B004	IRGC 136031	temp	0	A	QIUGUANGTENGXI 104::[B004]	B004	IRGC 136031	temp	0	C	T	T	-	-	-	C	C	C	T	C	-	-	-	-	C	-	G	C	T	T	-	A	-	G	G	C	T	T	C	G	T	G	G	G	G	G	-	-
WANSHI::[B005]	B005	IRGC 136067	temp	0	A	WANSHI::[B005]	B005	IRGC 136067	temp	0	C	T	T	-	-	-	C	C	C	T	C	-	-	-	-	C	-	G	C	T	T	-	A	-	G	G	C	T	T	C	G	T	G	G	G	G	G	-	-
YIKONG::[B006]	B006	IRGC 136078	indx	0	A	YIKONG::[B006]	B006	IRGC 136078	indx	6	C	T	T	-	-	-	C	C	C	T	C	-	-	-	-	C	-	G	C	T	T	-	A	-	G	G	C	T	T	C	G	T	G	G	G	G	T	T	T
BAXIANG::[B008]	B008		temp	0	A	BAXIANG::[B008]	B008		temp	1	C	T	T	-	-	-	C	C	C	T	C	-	-	-	-	C	-	G	C	T	T	-	A	-	G	G	C	T	T	C	G	T	G	G	G	G	G	-	-
VIETNAM ZAODAO::[B009]	B009	IRGC 136065	ind1A	0	A	VIETNAM ZAODAO::[B009]	B009	IRGC 136065	ind1A	13	C	T	T	-	-	-	C	C	C	T	C	-	-	-	-	C	-	G	C	T	T	-	A	-	G	G	C	T	T	C	G	T	G	G	G	G	T	T	-
MALAIHONG::[B010]	B010		ind1A	0	A	MALAIHONG::[B010]	B010		ind1A	13	C	T	T	-	-	-	C	C	C	T	C	-	-	-	-	C	-/A	G	C	T	T	-/A	A	-/A	G	G	C	T	T	C	G	T	G	G	G	G	G	-/A	-
CO 22::[B011]	B011	IRGC 135870	indx	0	A	CO 22::[B011]	B011	IRGC 135870	indx	16	C	T	T	-	-	-	C	C	C	T	C	-	-	-	-	C	-	G	C	T	T	-	A	-	G	G	C	T	T	C	G	T	G	G	G	G	T	T	-
2037(RAJAHAMSAL)::[B012]	B012	IRGC 135815	ind2	0	A	2037(RAJAHAMSAL)::[B012]	B012	IRGC 135815	ind2	22	C	T	T	-	-	-	C	C	C	T	C	-	-	-	-	A	A	G	C	T	T	-	A	-	G	G	C	T	T	C	G	T	G	G	G	G	G	-	-
SRI LANKA 1::[B013]	B013	IRGC 136049	indx	0	A	SRI LANKA 1::[B013]	B013	IRGC 136049	indx	10	C	T	T	-	-	-	C	C	C	T	C	-	-	-	-	A	A	G	C	T	T	-	A	-	G	G	C	T	T	C	G	T	G	G	G	G	G	-	-
WUZILUOSI 215::[B014]	B014	IRGC 136072	temp	0	A	WUZILUOSI 215::[B014]	B014	IRGC 136072	temp	0	C	T	T	-	-	-	C	C	C	T	C	-	-	-	-	C	-	G	C	T	T	-	A	-	G	G	C	T	T	C	G	T	G	G	G	G	G	-	-
KAHAMU::[B015]	B015	IRGC 135963	ind1A	0	A	KAHAMU::[B015]	B015	IRGC 135963	ind1A	13	C	T	T	-	-	-	C	C	C	T	C	-	-	-	-	C	-	G	C	T	T	-	A	-	G	G	C	T	T	C	G	T	G	G	G	G	T	T	-
AOMIERTE 168::[B016]	B016	IRGC 135829	temp	0	A	AOMIERTE 168::[B016]	B016	IRGC 135829	temp	0	C	T	T	-	-	-	C	C	C	T	C	-	-	-	-	C	-	G	C	T	T	-	A	-	G	G	C	T	T	C	G	T	G	G	G	G	G	-	-
AMERICAN HUANGKEDAO::[B018]	B018	IRGC 135827	trop	0	A	AMERICAN HUANGKEDAO::[B018]	B018	IRGC 135827	trop	0	C	T	T	-	-	-	C	C	C	T	C	-	-	-	-	C	-	G	C	T	T	-	A	-	G	G	C	T	T	C	G		G	G	G	G	G	-	-
JINEIYADAO::[B020]	B020	IRGC 135958	admix	0	A	JINEIYADAO::[B020]	B020	IRGC 135958	admix	13	C	T	T	-	-	-	C	C	C	T	C	-	-	-	-	A	A	G	C	T	T	-	A	-	G	G	C	T	T	C	G	T	G	G	G	G	G	-	-
XIANLUOSICHI::[B024]	B024	IRGC 136076	ind1A	0	A	XIANLUOSICHI::[B024]	B024	IRGC 136076	ind1A	13	C	T	T	-	-	-	C	C	C	T	C	-	-	-	-	C	-	G	C	T	T	-	A	-	G	G	C	T	T	C	G	T	G	G	G	G	T	T	-
DJANDA MANDJA::[B025]	B025	IRGC 135881	trop	0	A	DJANDA MANDJA::[B025]	B025	IRGC 135881	trop	1	C	T	T	-	-	-	C	C	C	T	C	-	-	-	-	C	-	G	C	T	T	-	A	-	G	G	C	T	T	C	G	T	G	G	G	G	G	-	-
PADI LADANG ASE POLO KOMEK::[B026]	B026	IRGC 136017	indx	0	A	PADI LADANG ASE POLO KOMEK::[B026]	B026	IRGC 136017	indx	16	C	T	T	-	-	-	C	C	C	T	C	-	-	-	-	C	-	G	C	T	T	-	A	-	G	G	C	T	T	C	G	T	G	G	G	G	T	T	-
DUMAI::[B029]	B029	IRGC 135885	ind1B	0	A	DUMAI::[B029]	B029	IRGC 135885	ind1B	1	C	T	T	-	-	-	C	C	C	T	C	-	-	-	-	C	-	G	C	T	T	-	A	-	G	G	C	T	T	C	G	T	G	G	G	G	G	-	-
ALBANIA RICE::[B034]	B034	IRGC 135825	temp	0	A	ALBANIA RICE::[B034]	B034	IRGC 135825	temp	0	C	T	T	-	-	-	C	C	C	T	C	-	-	-	-	C	-	G	C	T	T	-	A	-	G	G	C	T	T	C	G	T	G	G	G	G	G	-	-
JIJUCAS CLARO::[B036]	B036	IRGC 135955	japx	0	A	JIJUCAS CLARO::[B036]	B036	IRGC 135955	japx	1	C	T	T	-	-	-	C	C	C	T	C	-	-	-	-	C	-	G	C	T	T	-	A	-	G	G	C	T	T	C	G	T	G	G	G	G	G	-	-
NANOAY P.A::[B037]	B037	IRGC 135999	trop	0	A	NANOAY P.A::[B037]	B037	IRGC 135999	trop	0	C	T	T	-	-	-	C	C	C	T	C	-	-	-	-	C	-	G	C	T	T	-	A	-	G	G	C	T	T	C	G	T	G	G	G	G	G	-	-
K 24::[B040]	B040	IRGC 135962	indx	0	A	K 24::[B040]	B040	IRGC 135962	indx	13	C	T	T	-	-	-	C	C	C	T	C	-	-	-	-	C	-	G	C	T	T	-	A	-	G	G	C	T	T	C	G	T	G	G	G	G	T	T	-
YR 83-23-11::[B043]	B043	IRGC 136081	trop	0	A	YR 83-23-11::[B043]	B043	IRGC 136081	trop	0	C	T	T	-	-	-	C	C	C	T	C	-	-	-	-	C	-	G	C	T	T	-	A	-	G	G	C	T	T	C	G	T	G	G	G	G	G	-	-
GONGCHENGXIANG::[B045]	B045	IRGC 135896	temp	0	A	GONGCHENGXIANG::[B045]	B045	IRGC 135896	temp	0	C	T	T	-	-	-	C	C	C	T	C	-	-	-	-	C	-	G	C	T	T	-	A	-	G	G	C	T	T	C	G	T	G	G	G	G	G	-	-
QIUTIANXIAOTING::[B046]	B046	IRGC 136032	temp	0	A	QIUTIANXIAOTING::[B046]	B046	IRGC 136032	temp	0	C	T	T	-	-	-	C	C	C	T	C	-	-	-	-	C	-	G	C	T	T	-	A	-	G	G	C	T	T	C	G	T	G	G	G	G	G	-	-
GZ 1368-5-4::[B051]	B051	IRGC 135899	indx	0	A	GZ 1368-5-4::[B051]	B051	IRGC 135899	indx	13	C	T	T	-	-	-	C	C	C	T	C	-	-	-	-	C	-	G	C	T	T	-	A	-	G	G	C	T	T	C	G	T	G	G	G	G	T	T	-
J34::[B052]	B052	IRGC 135949	ind2	0	A	J34::[B052]	B052	IRGC 135949	ind2	21	C	T	T	-	-	-	C	C	C	T	C	-	-	-	-	A	A	G	C	T	T	-	A	-	G	G	C	T	T	C	G	T	G	G	G	G	G	-	-
80A97YR303-304-1-3::[B053]	B053	IRGC 135819	trop	0	A	80A97YR303-304-1-3::[B053]	B053	IRGC 135819	trop	0	C	T	T	-	-	-	C	C	C	T	C	-	-	-	-	C	-	G	C	T	T	-	A	-	G	G	C	T	T	C	G	T	G	G	G	G	G	-	-
80050YR72136-43::[B054]	B054	IRGC 135817	trop	0	A	80050YR72136-43::[B054]	B054	IRGC 135817	trop	0	C	T	T	-	-	-	C	C	C	T	C	-	-	-	-	C	-	G	C	T	T	-	A	-	G	G	C	T	T	C	G	T	G	G	G	G	G	-	-
YR196::[B055]	B055	IRGC 136080	temp	0	A	YR196::[B055]	B055	IRGC 136080	temp	16	C	T	T	-	-	-	C	C	C	T	C	-	-	-	-	A	A	G	C	T	T	-	A	-	G	G	C	T	T	C	G	T	G	G	G	G	G	-	-
TIEGANWU::[B056]	B056		temp	0	A	TIEGANWU::[B056]	B056		temp	2	C	T	T	-	-	-	C	C	C	T	C	-	-	-	-	C	-	G	C	T	T	-	A	-	G	G	C	T	T	C	G	T	G	G	G	G	G	-	-
XIUSHUI 115::[B057]	B057		temp	0	A	XIUSHUI 115::[B057]	B057		temp	3	C	T	T	-	-	-	C	C	C	T	C	-	-	-	-	C	-	G	C	T	T	-	A	-	G	G	C	T	T	C	G	T	G	G	G	G	G	-	-
NANJING 11::[B059]	B059		ind1A	0	A	NANJING 11::[B059]	B059		ind1A	5	C	T	T	-	-	-	C	C	C	T	C	-	-	-	-	C	-	G	C	T	T	-	A	-	G	G	C	T	T	C	G	T	G	G	G	G	T	T	-
AIJIAONANTE::[B060]	B060	IRGC 117600	ind1A	0	A	AIJIAONANTE::[B060]	B060	IRGC 117600	ind1A	5	C	T	T	-	-	-	C	C	C	T	C	-	-	-	-	C	-	G	C	T	T	-	A	-	G	G	C	T	T	C	G	T	G	G	G	G	T	T	-
GUANGLUAI 4::[B061]	B061		ind1A	0	A	GUANGLUAI 4::[B061]	B061		ind1A	5	C	T	T	-	-	-	C	C	C	T	C	-	-	-	-	C	-	G	C	T	T	-	A	-	G	G	C	T	T	C	G	T	G	G	G	G	T	T	-
NANTEHAO::[B062]	B062		ind1A	0	A	NANTEHAO::[B062]	B062		ind1A	11	C	T	T	-	-	-	C	C	C	T	C	-	-	-	-	C	-	G	C	T	T	-	A	-	G	G	C	T	T	C	G	T	G	G	G	G	G	-	-
LAOGUANGTOU 83::[B070]	B070		japx	0	A	LAOGUANGTOU 83::[B070]	B070		japx	1	C	T	T	-	-	-	C	C	C	T	C	-	-	-	-	C	-	G	C	T	T	-	A	-	G	G	C	T	T	C	G	T	G	G	G	G	G	-	-
TAISHANNUO::[B074]	B074		ind1A	0	A	TAISHANNUO::[B074]	B074		ind1A	13	C	T	T	-	-	-	C	C	C	T	C	-	-	-	-	C	-	G	C	T	T	-	A	-	G	G	C	T	T	C	G	T	G	G	G	G	T	T	-
DONGTINGWANXIAN::[B083]	B083		ind1A	0	A	DONGTINGWANXIAN::[B083]	B083		ind1A	16	C	T	T	-	-	-	C	C	C	T	C	-	-	-	-	A	A	G	C	T	T	-	A	-	G	G	C	T	T	C	G	T	G	G	G	G	G	-	-
BAWANGBIAN 1::[B084]	B084		admix	0	A	BAWANGBIAN 1::[B084]	B084		admix	0	C	T	T	-	-	-	C	C	C	T	C	-	-	-	-	C	-	G	C	T	T	-	A	-	G	G	C	T	T	C	G	T	G	G	G	G	G	-	-
ZIMI::[B090]	B090		indx	0	A	ZIMI::[B090]	B090		indx	15	C	T	T	-	-	-	C	C	C	T	C	-	-	-	-	A	A	G	C	T	T	-	A	-	G	G	C	T	T	C	G	T	G	G	G	G	G	-	-
GONGJU 73::[B092]	B092		ind1A	0	A	GONGJU 73::[B092]	B092		ind1A	5	C	T	T	-	-	-	C	C	C	T	C	-	-	-	-	C	-	G	C	T	T	-	A	-	G	G	C	T	T	C	G	T	G	G	G	G	T	T	-
ZINUO::[B094]	B094		ind1A	0.5	A/C	ZINUO::[B094]	B094		ind1A	7	C	T	T	-	-	-	C	C	C	T	C	-	-	-	-	C	-/A	G	C	T	T	-/A	A	-/A	G	G	C	T	T	C	G	T	G	G	G	G	G	-/A	-
MOWANGGUNEIZA::[B095]	B095		indx	0	A	MOWANGGUNEIZA::[B095]	B095		indx	15	C	T	T	-	-	-	C	C	C	T	C	-	-	-	-	A	A	G	C	T	T	-	A	-	G	G	C	T	T	C	G	T	G	G	G	G	G	-	-
JINZHINUO4::[B096]	B096		indx	0	A	JINZHINUO4::[B096]	B096		indx	13	C	T	T	-	-	-	C	C	C	T	C	-	-	-	-	A	A	G	C	T	T	-	A	-	G	G	C	T	T	C	G	T	G	G	G	G	G	-	-
MAGUZI::[B102]	B102		temp	0	A	MAGUZI::[B102]	B102		temp	0	C	T	T	-	-	-	C	C	C	T	C	-	-	-	-	C	-	G	C	T	T	-	A	-	G	G	C	T	T	C	G	T	G	G	G	G	G	-	-
JIABALA::[B104]	B104		ind1A	0		JIABALA::[B104]	B104		ind1A	13	C	T	T	-	-	-	C	C	C	T	C	-	-	-	-	C	-	G	C	T	T	-	A	-	G	G	C	T	T	C	G	T	G	G	G	G	T	T	-
XIANGGU::[B108]	B108		indx	0	A	XIANGGU::[B108]	B108		indx	15	C	T	T	-	-	-	C	C	C	T	C	-	-	-	-	A	A	G	C	T	T	-	A	-	G	G	C	T	T	C	G	T	G	G	G	G	G	-	-
LIUSHA 1::[B112]	B112		ind1A	0	A	LIUSHA 1::[B112]	B112		ind1A	4	C	T	T	-	-	-	C	C	C	T	C	-	-	-	-	C	-	G	C	T	T	-	A	-	G	G	C	T	T	C	G	T	G	G	G	G	G	-	-
CHENGDUAI 3::[B114]	B114		ind1A	0	A	CHENGDUAI 3::[B114]	B114		ind1A	1	C	T	T	-	-	-	C	C	C	T	C	-	-	-	-	C	-	G	C	T	T	-	A	-	G	G	C	T	T	C	G	T	G	G	G	G	G	-	-
XIANGWANXIAN 3::[B125]	B125		indx	0	A	XIANGWANXIAN 3::[B125]	B125		indx	13	C	T	T	-	-	-	C	C	C	T	C	-	-	-	-	C	-	G	C	T	T	-	A	-	G	G	C	T	T	C	G	T	G	G	G	G	T	T	-
ZAOXIAN 240::[B126]	B126		ind1A	0	A	ZAOXIAN 240::[B126]	B126		ind1A	4	C	T	T	-	-	-	C	C	C	T	C	-	-	-	-	C	-	G	C	T	T	-	A	-	G	G	C	T	T	C	G	T	G	G	G	G	G	-	-
DANGYU 5::[B127]	B127		ind1A	0	A	DANGYU 5::[B127]	B127		ind1A	4	C	T	T	-	-	-	C	C	C	T	C	-	-	-	-	C	-	G	C	T	T	-	A	-	G	G	C	T	T	C	G	T	G	G	G	G	G	-/T	-
YANSHUICHI::[B133]	B133		indx	0	A	YANSHUICHI::[B133]	B133		indx	14	C	T	T	-	-	-	C	C	C	T	C	-	-	-	-	A	A	G	C	T	T	-	A	-	G	G	C	T	T	C	G	T	G	G	G	G	G	-	-
XISHI 15::[B134]	B134		subtrop	0	A	XISHI 15::[B134]	B134		subtrop	1	C	T	T	-	-	-	C	C	C	T	C	-	-	-	-	C	-	G	C	T	T	-	A	-	G	G	C	T	T	C	G	T	G	G	G	G	G	-	-
GU 154::[B138]	B138		indx	0	A	GU 154::[B138]	B138		indx	1.5	C	T	T	-	-	-	C	C	C	T	C	-	-	-	-	C	-	G	C	T	T	-	A	-	G	G	C	T	T	C	G	T					G	-	-
PEI C122::[B140]	B140		ind1A	0	A	PEI C122::[B140]	B140		ind1A	5	C	T	T	-	-	-	C	C	C	T	C	-	-	-	-	C	-	G	C	T	T	-	A	-	G	G	C	T	T	C	G	T	G	G	G	G	T	T	-
NINGHUI 21::[B142]	B142		admix	0	A	NINGHUI 21::[B142]	B142		admix	0	C	T	T	-	-	-	C	C	C	T	C	-	-	-	-	C	-	G	C	T	T	-	A	-	G	G	C	T	T	C	G	T	G	G	G	G	G	-	-
HUHUI 628::[B144]	B144		japx	0	A	HUHUI 628::[B144]	B144		japx	1	C	T	T	-	-	-	C	C	C	T	C	-	-	-	-	C	-	G	C	T	T	-	A	-	G	G	C	T	T	C	G	T	G	G	G	G	G	-	-
JINNANTE 43B::[B151]	B151		ind1A	0	A	JINNANTE 43B::[B151]	B151		ind1A	4	C	T	T	-	-	-	C	C	C	T	C	-	-	-	-	C	-	G	C	T	T	-	A	-	G	G	C	T	T	C	G	T	G	G	G	G	T	T	-
ZAOSHUNONGHU 6::[B152]	B152		temp	0		ZAOSHUNONGHU 6::[B152]	B152		temp	0	C	T	T	-	-	-	C	C	C	T	C	-	-	-	-	C	-	G	C	T	T	-	A	-	G	G	C	T	T	C	G	T	G	G	G	G	G	-	-
LIMING B::[B154]	B154		temp	0	A	LIMING B::[B154]	B154		temp	1	C	T	T	-	-	-	C	C	C	T	C	-	-	-	-	C	-	G	C	T	T	-			G	G	C	T	T	C	G	T	G	G	G	G	G	-	-
G ZHENSHAN 97B::[B156]	B156		ind1A	0	A	G ZHENSHAN 97B::[B156]	B156		ind1A	13	C	T	T	-	-	-	C	C	C	T	C	-	-	-	-	C	-	G	C	T	T	-	A	-	G	G	C	T	T	C	G	T	G	G	G	G	T	T	-
TAIZHONG 65/TAIZHONGHR539::[B158]	B158		admix	0	A	TAIZHONG 65/TAIZHONGHR539::[B158]	B158		admix	10	C	T	T	-	-	-	C	C	C	T	C	-	-	-	-	C	-	G	C	T	T	-	A	-	G	G	C	T	T	C	G	T	G	G	G	G	T	T	-
SHUIYUAN 300LI::[B160]	B160		temp	0	A	SHUIYUAN 300LI::[B160]	B160		temp	0	C	T	T	-	-	-	C	C	C	T	C	-	-	-	-	C	-	G	C	T	T	-	A	-	G	G	C	T	T	C	G	T	G	G	G	G	G	-	-
YELICANGHUA::[B161]	B161		temp	0	A	YELICANGHUA::[B161]	B161		temp	1	C	T	T	-	-	-	C	C	C	T	C	-	-	-	-	C	-	G	C	T	T	-	A	-	G	G	C	T	T	C	G	T	G	G	G	G	G	-	-
BAIGEDAO::[B162]	B162		temp	0	A	BAIGEDAO::[B162]	B162		temp	0	C	T	T	-	-	-	C	C	C	T	C	-	-	-	-	C	-	G	C	T	T	-	A	-	G	G	C	T	T	C	G	T	G	G	G	G	G	-	-
ZHUYUAN::[B168]	B168	IRGC 136096	temp	0	A	ZHUYUAN::[B168]	B168	IRGC 136096	temp	0	C	T	T	-	-	-	C	C	C	T	C	-	-	-	-	C	-	G	C	T	T	-	A	-	G	G	C	T	T	C	G	T	G	G	G	G	G	-	-
AILUYU::[B169]	B169		temp	0	A	AILUYU::[B169]	B169		temp	1	C	T	T	-	-	-	C	C	C	T	C	-	-	-	-	C	-	G	C	T	T	-	A	-	G	G	C	T	T	C	G	T	G	G	G	G	G	-	-
HONGSE 90::[B170]	B170	IRGC 135905	temp	0	A	HONGSE 90::[B170]	B170	IRGC 135905	temp	0	C	T	T	-	-	-	C	C	C	T	C	-	-	-	-	C	-	G	C	T	T	-	A	-	G	G	C	T	T	C	G	T	G	G	G	G	G	-	-
LINGUO::[B171]	B171	IRGC 135974	temp	0	A	LINGUO::[B171]	B171	IRGC 135974	temp	1	C	T	T	-	-	-	C	C	C	T	C	-	-	-	-	C	-	G	C	T	T	-	A	-	G	G	C	T	T	C	G	T	G	G	G	G	G	-	-
TJANTAJAN::[B173]	B173	IRGC 136056	admix	0	A	TJANTAJAN::[B173]	B173	IRGC 136056	admix	13	C	T	T	-	-	-	C	C	C	T	C	-	-	-	-	A	A	G	C	T	T	-	A	-	G	G	C	T	T	C	G	T	G	G	G	G	G	-	-
BRC 25-146-2-1::[B176]	B176	IRGC 135850	indx	0	A	BRC 25-146-2-1::[B176]	B176	IRGC 135850	indx	0	C	T	T	-	-	-	C	C	C	T	C	-	-	-	-	C	-	G	C	T	T	-	A	-	G	G	C	T	T	C	G	T	G	G	G	G	G	-	-
KELUODUO B::[B179]	B179	IRGC 135966	temp	0	A	KELUODUO B::[B179]	B179	IRGC 135966	temp	1	C	T	T	-	-	-	C	C	C	T	C	-	-	-	-	C	-	G	C	T	T	-	A	-	G	G	C	T	T	C	G	T	G	G	G	G	G	-	-
71011::[B181]	B181	IRGC 135816	ind1A	0	A	71011::[B181]	B181	IRGC 135816	ind1A	3	C	T	T	-	-	-	C	C	C	T	C	-	-	-	-	C	-	G	C	T	T	-	A	-	G	G	C	T	T	C	G		G	G	G	G	G	-	-
CHIMAO::[B182]	B182		temp	0	A	CHIMAO::[B182]	B182		temp	1	C	T	T	-	-	-	C	C	C	T	C	-	-	-	-	C	-	G	C	T	T	-	A	-	G	G	C	T	T	C	G	T	G	G	G	G	G	-	-
QINGNUO KYOHATAMOCHI::[B183]	B183	IRGC 136030	temp	0	A	QINGNUO KYOHATAMOCHI::[B183]	B183	IRGC 136030	temp	0	C	T	T	-	-	-	C	C	C	T	C	-	-	-	-	C	-	G	C	T	T	-	A	-	G	G	C	T	T	C	G	T	G	G	G	G	G	-	-
SLK 2-18-2::[B185]	B185	IRGC 136048	indx	0	A	SLK 2-18-2::[B185]	B185	IRGC 136048	indx	3	C	T	T	-	-	-	C	C	C	T	C	-	-	-	-	C	-	G	C	T	T	-	A	-	G	G	C	T	T	C	G	T	G	G	G	G	G	-	-
RP 1570-44-1::[B187]	B187	IRGC 136035	indx	0	A	RP 1570-44-1::[B187]	B187	IRGC 136035	indx	0	C	T	T	-	-	-	C	C	C	T	C	-	-	-	-	C	-	G	C	T	T	-	A	-	G	G	C	T	T	C	G	T	G	G	G	G	G	-	-
IRAT 36::[B188]	B188	IRGC 135944	trop	0	A	IRAT 36::[B188]	B188	IRGC 135944	trop	0	C	T	T	-	-	-	C	C	C	T	C	-	-	-	-	C	-	G	C	T	T	-	A	-	G	G	C	T	T	C	G	T	G	G	G	G	G	-	-
ITA 221::[B190]	B190		trop	0	A	ITA 221::[B190]	B190		trop	16	C	T	T	-	-	-	C	C	C	T	C	-	-	-	-	A	A	G	C	T	T	-	A	-	G	G	C	T	T	C	G	T	G	G	G	G	G	-	-
80A60YR71009-1-5::[B191]	B191	IRGC 135818	trop	0	A	80A60YR71009-1-5::[B191]	B191	IRGC 135818	trop	1	C	T	T	-	-	-	C	C	C	T	C	-	-	-	-	C	-	G	C	T	T	-	A	-	G	G	C	T	T	C	G	T	G	G	G	G	G	-	-
R42::[B192]	B192	IRGC 136033	admix	0	A	R42::[B192]	B192	IRGC 136033	admix	0	C	T	T	-	-	-	C	C	C	T	C	-	-	-	-	C	-	G	C	T	T	-	A	-	G	G	C	T	T	C	G	T	G	G	G	G	G	-	-
TAIDONGLUDAO::[B196]	B196		trop	0	A	TAIDONGLUDAO::[B196]	B196		trop	1	C	T	T	-	-	-	C	C	C	T	C	-	-	-	-	C	-	G	C	T	T	-	A	-	G	G	C	T	T	C	G	T	G	G	G	G	G	-	-
CHENGNONGSHUIJING::[B201]	B201		ind1B	0	A	CHENGNONGSHUIJING::[B201]	B201		ind1B	0	C	T	T	-	-	-	C	C	C	T	C	-	-	-	-	C	-	G	C	T	T	-	A	-	G	G	C	T	T	C	G	T	G	G	G	G	G	-	-
LONGHUAMAOHU::[B204]	B204		temp	0	A	LONGHUAMAOHU::[B204]	B204		temp	0	C	T	T	-	-	-	C	C	C	T	C	-	-	-	-	C	-	G	C	T	T	-	A	-	G	G	C	T	T	C	G	T	G	G	G	G	G	-	-
CUNSANLI::[B205]	B205		japx	0	A	CUNSANLI::[B205]	B205		japx	1	C	T	T	-	-	-	C	C	C	T	C	-	-	-	-	C	-	G	C	T	T	-	A	-	G	G	C	T	T	C	G	T	G	G	G	G	G	-	-
AIHECHI::[B207]	B207		indx	0	A	AIHECHI::[B207]	B207		indx	6	C	T	T	-	-	-	C	C	C	T	C	-	-	-	-	C	-	G	C	T	T	-	A	-	G	G	C	T	T	C	G	T	G	G	G	G	G	-	-
LUCAIHAO::[B208]	B208		ind1A	0	A	LUCAIHAO::[B208]	B208		ind1A	13	C	T	T	-	-	-	C	C	C	T	C	-	-	-	-	C	-	G	C	T	T	-	A	-	G	G	C	T	T	C	G	T	G	G	G	G	T	T	-
NANXIONGZAOYOUZHAN::[B210]	B210		ind1A	0	A	NANXIONGZAOYOUZHAN::[B210]	B210		ind1A	24	C	T	T	-	-	-	C	C	C	T	C	-	-	-	-	A	A	G	C	T	T	-	A	-	G	G	C	T	T	C	G	T	G	G	G	G	G	-	-
XUANENCHANGTANQINGZHAN::[B214]	B214		ind1B	0	A	XUANENCHANGTANQINGZHAN::[B214]	B214		ind1B	13	C	T	T	-	-	-	C	C	C	T	C	-	-	-	-	C	-	G	C	T	T	-	A	-	G	G	C	T	T	C	G	T	G	G	G	G	T	T	-
HONGQI 5::[B215]	B215	IRGC 135904	temp	0	A	HONGQI 5::[B215]	B215	IRGC 135904	temp	2	C	T	T	-	-	-	C	C	C	T	C	-	-	-	-	C	-	G	C	T	T	-	A	-	G	G	C	T	T	C	G	T	G	G	G	G	G	-	-
HANMADAO4::[B216]	B216		ind1A	0	A	HANMADAO4::[B216]	B216		ind1A	12			T	-	-	-	C	C	C	T	C	-	-	-	-	C	-	G	C	T	T	-	A	-	G	G	C	T	T	C	G	T	G	G	G	G	G	-/T	-
BEIZINUO::[B222]	B222		ind1A	0	A	BEIZINUO::[B222]	B222		ind1A	4	C	T	T	-	-	-	C	C	C	T	C	-	-	-	-	C	-	G	C	T	T	-	A	-	G	G	C	T	T	C	G	T	G	G	G	G	G	-/T	-
YOUNIAN::[B224]	B224		ind1A	0	A	YOUNIAN::[B224]	B224		ind1A	21	C	T	T	-	-	-	C	C	C	T	C	-	-	-	-	A	A	G	C	T	T	-	A	-	G	G	C	T	T	C	G	T	G	G	G	G	G	-	-
HEIMANGDAO::[B226]	B226		temp	0	A	HEIMANGDAO::[B226]	B226		temp	0	C	T	T	-	-	-	C	C	C	T	C	-	-	-	-	C	-	G	C	T	T	-	A	-	G	G	C	T	T	C	G	T	G	G	G	G	G	-	-
MENJIADING 2::[B229]	B229		indx	0	A	MENJIADING 2::[B229]	B229		indx	24	C	T	T	-	-	-	C	C	C	T	C	-	-	-	-	A	A	G	C	T	T	-	A	-	G	G	C	T	T	C	G	T	G	G	G	G	G	-	-
AITUOGU 151::[B234]	B234		ind1A	0	A	AITUOGU 151::[B234]	B234		ind1A	13	C	T	T	-	-	-	C	C	C	T	C	-	-	-	-	C	-	G	C	T	T	-	A	-	G	G	C	T	T	C	G	T	G	G	G	G	T	T	-
ZHONGHUA 8::[B235]	B235		temp	0	A	ZHONGHUA 8::[B235]	B235		temp	0	C	T	T	-	-	-	C	C	C	T	C	-	-	-	-	C	-	G	C	T	T	-	A	-	G	G	C	T	T	C	G	T	G	G	G	G	G	-	-
JINDAO 1::[B236]	B236	IRGC 135957	temp	0	A	JINDAO 1::[B236]	B236	IRGC 135957	temp	0	C	T	T	-	-	-	C	C	C	T	C	-	-	-	-	C	-	G	C	T	T	-	A	-	G	G	C	T	T	C	G	T	G		G	G	G	-	-
ZHENDAO 232::[B239]	B239	IRGC 136091	ind1A	0	A	ZHENDAO 232::[B239]	B239	IRGC 136091	ind1A	0	C	T	T	-	-	-	C	C	C	T	C	-	-	-	-	C	-	G	C	T	T	-	A	-	G	G	C	T	T	C	G	T	G	G	G	G	G	-	-
ZHENGDAO 5::[B240]	B240		temp	0	A	ZHENGDAO 5::[B240]	B240		temp	0	C	T	T	-	-	-	C	C	C	T	C	-	-	-	-	C	-	G	C	T	T	-	A	-	G	G	C	T	T	C	G	T	G	G	G	G	G	-	-
LAMUJIA::[B241]	B241		subtrop	0	A	LAMUJIA::[B241]	B241		subtrop	1	C	T	T	-	-	-	C	C	C	T	C	-	-	-	-	C	-	G	C	T	T	-	A	-	G	G	C	T	T	C	G	T	G	G	G	G	G	-	-
GUI 630::[B242]	B242		indx	0	A	GUI 630::[B242]	B242		indx	0	C	T	T	-	-	-	C	C	C	T	C	-	-	-	-	C	-	G	C	T	T	-	A	-	G	G	C	T	T	C	G	T	G	G	G	G	G	-	-
XIANGDAO::[B244]	B244		ind1A	0	A	XIANGDAO::[B244]	B244		ind1A	5	C	T	T	-	-	-	C	C	C	T	C	-	-	-	-	C	-	G	C	T	T	-	A	-	G	G	C	T	T	C	G	T	G	G	G	G	T	T	-
SHANJIUGU::[B245]	B245		subtrop	0	A	SHANJIUGU::[B245]	B245		subtrop	1	C	T	T	-	-	-	C	C	C	T	C	-	-	-	-	C	-	G	C	T	T	-	A	-	G	G	C	T	T	C	G	T	G	G	G	G	G	-	-
LAOZAOGU::[B246]	B246		indx	0	A	LAOZAOGU::[B246]	B246		indx	17	C	T	T	-	-	-	C	C	C	T	C	-	-	-	-	A	A	G	C	T	T	-	A	-	G	G	C	T	T	C	G	T	G	G	G	G	G	-	-
ZHUZHEN B::[B248]	B248		ind1A	0	A	ZHUZHEN B::[B248]	B248		ind1A	4	C	T	T	-	-	-	C	C	C	T	C	-	-	-	-	C	-	G	C	T	T	-	A	-	G	G	C	T	T	C	G	T	G	G	G	G	G	-	-
CHAOYANGYIHAO B::[B249]	B249		ind1A	0	A	CHAOYANGYIHAO B::[B249]	B249		ind1A	12	C	T	T	-	-	-	C	C	C	T	C	-	-	-	-	C	-	G	C	T	T	-	A	-	G	G	C	T	T	C	G	T	G	G	G	G	G	-	-
JIANGNONGZAO 1 B::[B253]	B253		indx	0	A	JIANGNONGZAO 1 B::[B253]	B253		indx	13	C	T	T	-	-	-	C	C	C	T	C	-	-	-	-	C	-	G	C	T	T	-	A	-	G	G	C	T	T	C	G	T	G	G	G	G	T	T	-
JINGHU3 B::[B254]	B254		indx	0	A	JINGHU3 B::[B254]	B254		indx	13	C	T	T	-	-	-	C	C	C	T	C	-	-	-	-	C	-	G	C	T	T	-	A	-	G	G	C	T	T	C	G	T	G	G	G	G	T	T	-
DIANRUI 409B::[B255]	B255		indx	0	A	DIANRUI 409B::[B255]	B255		indx	8	C	T	T	-	-	-	C	C	C	T	C	-	-	-	-	A	A	G	C	T	T	-	A	-					T	C	G	T	G	G	G	G	G	-	-
MAMAGU::[B260]	B260		ind1A	0	A	MAMAGU::[B260]	B260		ind1A	9	C	T	T	-	-	-	C	C	C	T	C	-	-	-	-	C	-	G	C	T	T	-	A	-	G	G	C	T	T	C	G	T	G	G	G	G	G	-	-
WEIGUO::[B263]	B263		temp	0	A	WEIGUO::[B263]	B263		temp	1	C	T	T	-	-	-	C	C	C	T	C	-	-	-	-	C	-	G	C	T	T	-	A	-	G	G	C	T	T	C	G	T	G	G	G	G	G	-	-
SANBAILI::[B264]	B264		ind1A	0	A	SANBAILI::[B264]	B264		ind1A	13	C	T	T	-	-	-	C	C	C	T	C	-	-	-	-	C	-	G	C	T	T	-	A	-	G	G	C	T	T	C	G	T	G	G	G	G	T	T	-
YUEFU::[B269]	B269	IRGC 136083	temp	0	A	YUEFU::[B269]	B269	IRGC 136083	temp	0	C	T	T	-	-	-	C	C	C	T	C	-	-	-	-	C	-	G	C	T	T	-	A	-	G	G	C	T	T	C	G	T	G	G	G	G	G	-	-
GANG 46B::[CX10]	CX10	IRGC 135890	ind1A	0	A	GANG 46B::[CX10]	CX10	IRGC 135890	ind1A	13	C	T	T	-	-	-	C	C	C	T	C	-	-	-	-	C	-	G	C	T	T	-	A	-	G	G	C	T	T	C	G	T	G	G	G	G	T	T	-
PALUNG 2::[CX100]	CX100	IRGC 136020	ind1B	0	A	PALUNG 2::[CX100]	CX100	IRGC 136020	ind1B	1	C	T	T	-	-	-	C	C	C	T	C	-	-	-	-	C	-	G	C	T	T	-	A	-	G	G	C	T	T	C	G	T	G	G	G	G	G	-	-
HEI MI CHAN::[CX101]	CX101	IRGC 135902	ind1A	0	A	HEI MI CHAN::[CX101]	CX101	IRGC 135902	ind1A	13	C	T	T	-	-	-	C	C	C	T	C	-	-	-	-	C	-	G	C	T	T	-	A	-	G	G	C	T	T	C	G	T	G	G	G	G	T	T	-
RUBIO::[CX103]	CX103	IRGC 136036	admix	0	A	RUBIO::[CX103]	CX103	IRGC 136036	admix	13	C	T	T	-	-	-	C	C	C	T	C	-	-	-	-	A	A	G	C	T	T	-	A	-	G	G	C	T	T	C	G	T	G	G	G	G	G	-	-
DACCA6::[CX109]	CX109	IRGC 135876	japx	0	A	DACCA6::[CX109]	CX109	IRGC 135876	japx	24	C	T	T	-	-	-	C	C	C	T	C	-	-	-	-	A	A	G	C	T	T	-	A	-	G	G	C	T	T	C	G	T	G	G	G	G	G	-	-
GUMEI 2::[CX11]	CX11		japx	0	A	GUMEI 2::[CX11]	CX11		japx	0	C	T	T	-	-	-	C	C	C	T	C	-	-	-	-	C	-	G	C	T	T	-	A	-	G	G	C	T	T	C	G	T	G	G	G	G	G	-	-
GIZA14::[CX111]	CX111	IRGC 135894	trop	0	A	GIZA14::[CX111]	CX111	IRGC 135894	trop	0	C	T	T	-	-	-	C	C	C	T	C	-	-	-	-	C	-	G	C	T	T	-	A	-	G	G	C	T	T	C	G	T	G	G	G	G	G	-	-
BINIAPAN::[CX113]	CX113	IRGC 135846	trop	0	A	BINIAPAN::[CX113]	CX113	IRGC 135846	trop	1	C	T	T	-	-	-	C	C	C	T	C	-	-	-	-	C	-	G	C	T	T	-	A	-	G	G	C	T	T	C	G	T	G	G	G	G	G	-	-
GUANG LU AI 4::[CX114]	CX114		ind1A	0	A	GUANG LU AI 4::[CX114]	CX114		ind1A	5	C	T	T	-	-	-	C	C	C	T	C	-	-	-	-	C	-	G	C	T	T	-	A	-	G	G	C	T	T	C	G	T	G	G	G	G	T	T	-
YUN HUI 72::[CX115]	CX115		indx	0	A	YUN HUI 72::[CX115]	CX115		indx	1	C	T	T	-	-	-	C	C	C	T	C	-	-	-	-	C	-	G	C	T	T	-	A	-	G	G	C	T	T	C	G	T	G	G	G	G	G	-	-
WUDADAOZHONG::[CX116]	CX116	IRGC 136070	temp	0	A	WUDADAOZHONG::[CX116]	CX116	IRGC 136070	temp	0	C	T	T	-	-	-	C	C	C	T	C	-	-	-	-	C	-	G	C	T	T	-	A	-	G	G	C	T	T	C	G	T	G	G	G	G	G	-	-
IR65600-27-1-2-2::[CX117]	CX117	IRGC 135930	indx	0	A	IR65600-27-1-2-2::[CX117]	CX117	IRGC 135930	indx	5	C	T	T	-	-	-	C	C	C	T	C	-	-	-	-	C	-	G	C	T	T	-	A	-	G	G	C	T	T	C	G	T	G	G	G	G	T	T	-
YU QIU GU::[CX123]	CX123		ind1A	0	A	YU QIU GU::[CX123]	CX123		ind1A	16	C	T	T	-	-	-	C	C	C	T	C	-	-	-	-	A	A	G	C	T	T	-	A	-	G	G	C	T	T	C	G	T	G	G	G	G	G	-	-
CAOZHAO-2::[CX125]	CX125		ind1B	0	A	CAOZHAO-2::[CX125]	CX125		ind1B	23	C	T	T	-	-	-	C	C	C	T	C	-	-	-	-	A	A	G	C	T	T	-	A	-	G	G	C	T	T	C	G	T	G	G	G	G	G	-	-
GAJALE::[CX128]	CX128	IRGC 135889	indx	0	A	GAJALE::[CX128]	CX128	IRGC 135889	indx	4	C	T	T	-	-	-	C	C	C	T	C	-	-	-	-	C	-	G	C	T	T	-	A	-	G	G	C	T	T	C	G	T	G	G	G	G	G	-	-
MOLOK::[CX129]	CX129	IRGC 135986	trop	0	A	MOLOK::[CX129]	CX129	IRGC 135986	trop	0	C	T	T	-	-	-	C	C	C	T	C	-	-	-	-	C	-	G	C	T	T	-	A	-	G	G	C	T	T	C	G	T	G	G	G	G	G	-	-
CHIPDA::[CX130]	CX130	IRGC 135864	ind2	0	A	CHIPDA::[CX130]	CX130	IRGC 135864	ind2	20	C	T	T	-	-	-	C	C	C	T	C	-	-	-	-	A	A	G	C	T	T	-	A	-	G	G	C	T	T	C	G	T	G	G	G	G	G	-	-
ZALE::[CX131]	CX131	IRGC 136087	ind1A	0	A	ZALE::[CX131]	CX131	IRGC 136087	ind1A	5	C	T	T	-	-	-	C	C	C	T	C	-	-	-	-	C	-	G	C	T	T	-	A	-	G	G	C	T	T	C	G	T	G	G	G	G	T	T	-
AP423::[CX132]	CX132	IRGC 135830	trop	0	A	AP423::[CX132]	CX132	IRGC 135830	trop	0	C	T	T	-	-	-	C	C	C	T	C	-	-	-	-	C	-	G	C	T	T	-	A	-	G	G	C	T	T	C	G	T	G	G	G	G	G	-	-
QD_441::[CX138]	CX138		japx	0	A	QD_441::[CX138]	CX138		japx	1	C	T	T	-	-	-	C	C	C	T	C	-	-	-	-	C	-	G	C	T	T	-	A	-	G	G	C	T	T	C	G	T	G	G	G	G	G	-	-
AMARELES::[CX139]	CX139	IRGC 135826	japx	0	A	AMARELES::[CX139]	CX139	IRGC 135826	japx	16	C	T	T	-	-	-	C	C	C	T	C	-	-	-	-	A	A	G	C	T	T	-	A	-	G	G	C	T	T	C	G	T	G	G	G	G	G	-	-
CHENNONG 265::[CX14]	CX14		temp	0	A	CHENNONG 265::[CX14]	CX14		temp	0	C	T	T	-	-	-	C	C	C	T	C	-	-	-	-	C	-	G	C	T	T	-	A	-	G	G	C	T	T	C	G	T	G	G	G	G	G	-	-
NIPPONBARE::[CX140]	CX140	IRGC 136196	temp	0	A	NIPPONBARE::[CX140]	CX140	IRGC 136196	temp	0	C	T	T	-	-	-	C	C	C	T	C	-	-	-	-	C	-	G	C	T	T	-	A	-	G	G	C	T	T	C	G	T	G	G	G	G	G	-	-
AI YEH LU::[CX142]	CX142	IRGC 135823	japx	0	A	AI YEH LU::[CX142]	CX142	IRGC 135823	japx	0	C	T	T	-	-	-	C	C	C	T	C	-	-	-	-	C	-	G	C	T	T	-	A	-	G	G	C	T	T	C	G	T	G	G	G	G	G	-	-
KHASAR::[CX143]	CX143	IRGC 135968	aro	0	A	KHASAR::[CX143]	CX143	IRGC 135968	aro	18	C	T	T	-	-	-	C	C	C	T						C	-	G	C	T	T	-	A	-	G	G	C	T	T	C	G	T	G	G			G	-	-
MINGHUI 63::[CX145]	CX145	IRGC 117271	indx	0	A	MINGHUI 63::[CX145]	CX145	IRGC 117271	indx	1	C	T	T	-	-	-	C	C	C	T	C	-	-	-	-	C	-	G	C	T	T	-	A	-	G	G	C	T	T	C	G	T	G	G	G	G	G	-	-
CO43::[CX146]	CX146	IRGC 135871	indx	0	A	CO43::[CX146]	CX146	IRGC 135871	indx	13	C	T	T	-	-	-	C	C	C	T	C	-	-	-	-	A	A	G	C	T	T	-	A	-	G	G	C	T	T	C	G	T	G	G	G	G	G	-	-
Y134::[CX15]	CX15	IRGC 136077	ind1B	0	A	Y134::[CX15]	CX15	IRGC 136077	ind1B	0	C	T	T	-	-	-	C	C	C	T	C	-	-	-	-	C	-	G	C	T	T	-	A	-	G	G	C	T	T	C	G	T	G	G	G	G	G	-	-
AZUCENA::[CX151]	CX151	IRGC 117264	trop	0	A	AZUCENA::[CX151]	CX151	IRGC 117264	trop	2	C	T	T	-	-	-	C	C	C	T	C	-	-	-	-	C	-	G	C	T	T	-	A	-	G	G	C	T	T	C	G	T	G	G	G	G	G	-	-
MADHUKAR::[CX155]	CX155	IRGC 135979	ind2	0	A	MADHUKAR::[CX155]	CX155	IRGC 135979	ind2	24	C	T	T	-	-	-	C	C	C	T	C	-	-	-	-	A	A	G	C	T	T	-	A	-	G	G	C	T	T	C	G	T	G	G	G	G	G	-	-
YUAN JING 7::[CX16]	CX16		temp	0	A	YUAN JING 7::[CX16]	CX16		temp	0	C	T	T	-	-	-	C	C	C	T	C	-	-	-	-	C	-	G	C	T	T	-	A	-	G	G	C	T	T	C	G	T	G	G	G	G	G	-	-
TN1::[CX162]	CX162		ind1A	0	A	TN1::[CX162]	CX162		ind1A	13	C	T	T	-	-	-	C	C	C	T	C	-	-	-	-	C	-	G	C	T	T	-	A	-	G	G	C	T	T	C	G	T	G	G	G	G	T	T	-
YUEXIANGZHAN::[CX17]	CX17		indx	0	A	YUEXIANGZHAN::[CX17]	CX17		indx	4	C	T	T	-	-	-	C	C	C	T	C	-	-	-	-	C	-	G	C	T	T	-	A	-	G	G	C	T	T	C	G	T	G	G	G	G	T	T	-
ZAOXIAN 14::[CX18]	CX18	IRGC 136089	ind1A	0	A	ZAOXIAN 14::[CX18]	CX18	IRGC 136089	ind1A	12	C	T	T	-	-	-	C	C	C	T	C	-	-	-	-	C	-	G	C	T	T	-	A	-	G	G	C	T	T	C	G	T	G	G	G	G	G	-	-
BR11::[CX2]	CX2	IRGC 135847	indx	0	A	BR11::[CX2]	CX2	IRGC 135847	indx	5	C	T	T	-	-	-	C	C	C	T	C	-	-	-	-	C	-	G	C	T	T	-	A	-	G	G	C	T	T	C	G	T	G	G	G	G	T	T	-
IR69428-6-1-1-3-3::[CX205]	CX205	IRGC 135935	japx	0	A	IR69428-6-1-1-3-3::[CX205]	CX205	IRGC 135935	japx	15	C	T	T	-	-	-	C	C	C	T	C	-	-	-	-	A	A	G	C	T	T	-	A	-	G	G	C	T	T	C	G	T	G	G	G	G	G	-	-
IR2061-522-6-9::[CX206]	CX206	IRGC 135918	ind1B	0	A	IR2061-522-6-9::[CX206]	CX206	IRGC 135918	ind1B	15	C	T	T	-	-	-	C	C	C	T	C	-	-	-	-	C	-	G	C	T	T	-	A	-	G	G	C	T	T	C	G	T	G	G	G	G	G	-/T	-
GAOZI::[CX207]	CX207		indx	0	A	GAOZI::[CX207]	CX207		indx	4	C	T	T	-	-	-	C	C	C	T	C	-	-	-	-	C	-	G	C	T	T	-	A	-	G	G	C	T	T	C	G	T	G	G	G	G	G	-	-
M3122::[CX211]	CX211		temp	0	A	M3122::[CX211]	CX211		temp	0	C	T	T	-	-	-	C	C	C	T	C	-	-	-	-	C	-	G	C	T	T	-	A	-	G	G	C	T	T	C	G	T	G	G	G	G	G	-	-
NONGKEN 58::[CX212]	CX212	IRGC 136009	temp	0	A	NONGKEN 58::[CX212]	CX212	IRGC 136009	temp	1	C	T	T	-	-	-	C	C	C	T	C	-	-	-	-	C	-	G	C	T	T	-	A	-	G	G	C	T	T	C	G	T	G	G	G	G	G	-	-
BRAZIL NUODAO::[CX214]	CX214	IRGC 135849	trop	0	A	BRAZIL NUODAO::[CX214]	CX214	IRGC 135849	trop	0	C	T	T	-	-	-	C	C	C	T	C	-	-	-	-	C	-	G	C	T	T	-	A	-	G	G	C	T	T	C	G	T	G	G	G	G	G	-	-
FL478::[CX219]	CX219	IRGC 135888	indx	0	A	FL478::[CX219]	CX219	IRGC 135888	indx	14	C	T	T	-	-	-	C	C	C	T	C	-	-	-	-	C	-	G	C	T	T	-	A	-	G	G	C	T	T	C	G	T	G	G	G	G	T	T	-
IRAT109::[CX220]	CX220	IRGC 135941	trop	0	A	IRAT109::[CX220]	CX220	IRGC 135941	trop	0	C	T	T	-	-	-	C	C	C	T	C	-	-	-	-	C	-	G	C	T	T	-	A	-	G	G	C	T	T	C	G	T	G	G	G	G	G	-	-
BALA::[CX228]	CX228	IRGC 135836	indx	0	A	BALA::[CX228]	CX228	IRGC 135836	indx	13	C	T	T	-	-	-	C	C	C	T	C	-	-	-	-	C	-	G	C	T	T	-	A	-	G	G	C	T	T	C	G	T	G	G	G	G	T	T	-
VANDANA::[CX236]	CX236	IRGC 117598	indx	0	A	VANDANA::[CX236]	CX236	IRGC 117598	indx	12	C	T	T	-	-	-	C	C	C	T	C	-	-	-	-	C	-	G	C	T	T	-	A	-	G	G	C	T	T	C	G	T	G	G	G	G	G	-	-
B6136-3-TB-0-1-5::[CX237]	CX237	IRGC 135834	ind1B	0	A	B6136-3-TB-0-1-5::[CX237]	CX237	IRGC 135834	ind1B	13	C	T	T	-	-	-	C	C	C	T	C	-	-	-	-	C	-	G	C	T	T	-	A	-	G	G	C	T	T	C	G	T	G	G	G	G	T	T	-
BW311-9::[CX238]	CX238	IRGC 135854	ind1B	0	A	BW311-9::[CX238]	CX238	IRGC 135854	ind1B	12	C	T	T	-	-	-	C	C	C	T	C	-	-	-	-	C	-	G	C	T	T	-	A	-	G	G	C	T	T	C	G	T	G	G	G	G	T	T	-
IAC47::[CX241]	CX241	IRGC 135913	trop	0	A	IAC47::[CX241]	CX241	IRGC 135913	trop	15	C	T	T	-	-	-	C	C	C	T	C	-	-	-	-	C	-	G	C	T	T	-	A	-	G	G	C	T	T	C	G	T	G	G	G	G	G	-	-
KINANDANGPATONG::[CX248]	CX248	IRGC 135970	trop	0	A	KINANDANGPATONG::[CX248]	CX248	IRGC 135970	trop	0	C	T	T	-	-	-	C	C	C	T	C	-	-	-	-	C	-	G	C	T	T	-	A	-	G	G	C	T	T	C	G	T	G	G	G	G	G	-	-
2004::[CX249]	CX249	IRGC 135814	ind1B	0	A	2004::[CX249]	CX249	IRGC 135814	ind1B	0.5	C	T	T	-	-	-	C	C	C	T	C	-	-	-	-	C	-	G	C	T	T	-	A	-	G	G	C	T	T	C	G	T	G	G	G	G	G	-	-
XUDAO 4::[CX251]	CX251		temp	0	A	XUDAO 4::[CX251]	CX251		temp	0	C	T	T	-	-	-	C	C	C	T	C	-	-	-	-	C	-	G	C	T	T	-	A	-	G	G	C	T	T	C	G	T	G	G	G	G	G	-	-
IAC3::[CX262]	CX262	IRGC 135912	trop	0	A	IAC3::[CX262]	CX262	IRGC 135912	trop	1	C	T	T	-	-	-	C	C	C	T	C	-	-	-	-	C	-	G	C	T	T	-	A	-	G	G	C	T	T	C	G	T	G	G	G	G	G	-	-
PADISENEMOK::[CX263]	CX263	IRGC 136018	indx	0	A	PADISENEMOK::[CX263]	CX263	IRGC 136018	indx	13	C	T	T	-	-	-	C	C	C	T	C	-	-	-	-	C	-	G	C	T	T	-	A	-	G	G	C	T	T	C	G	T	G	G	G	G	T	T	-
MONOLAYA::[CX265]	CX265	IRGC 135988	indx	0	A	MONOLAYA::[CX265]	CX265	IRGC 135988	indx	13	C	T	T	-	-	-	C	C	C	T	C	-	-	-	-	C	-	G	C	T	T	-	A	-	G	G	C	T	T	C	G	T	G	G	G	G	T	T	-
DINORADO::[CX266]	CX266	IRGC 135880	trop	0	A	DINORADO::[CX266]	CX266	IRGC 135880	trop	15	C	T	T	-	-	-	C	C	C	T	C	-	-	-	-	A	A	G	C	T	T	-	A	-	G	G	C	T	T	C	G	T	G	G	G	G	G	-	-
IET1444::[CX267]	CX267	IRGC 135914	indx	0	A	IET1444::[CX267]	CX267	IRGC 135914	indx	12	C	T	T	-	-	-	C	C	C	T	C	-	-	-	-	C	-	G	C	T	T	-	A	-	G	G	C	T	T	C	G	T	G	G	G	G	G	-	-
ARROZVERMELHO::[CX268]	CX268	IRGC 135831	indx	0	A	ARROZVERMELHO::[CX268]	CX268	IRGC 135831	indx	5	C	T	T	-	-	-	C	C	C	T	C	-	-	-	-	C	-	G	C	T	T	-	A	-	G	G	C	T	T	C	G	T	G	G	G	G	T	T	-
IAC165::[CX269]	CX269	IRGC 135911	trop	0	A	IAC165::[CX269]	CX269	IRGC 135911	trop	24	C	T	T	-	-	-	C	C	C	T	C	-	-	-	-	A	A	G	C	T	T	-	A	-	G	G	C	T	T	C	G	T	G	G	G	G	G	-	-
TAICHUNGNATIVE1::[CX270]	CX270		ind1A	0	A	TAICHUNGNATIVE1::[CX270]	CX270		ind1A	4	C	T	T	-	-	-	C	C	C	T	C	-	-	-	-	C	-	G	C	T	T	-	A	-	G	G	C	T	T	C	G	T	G	G	G	G	G	-	-
IR8192-200-3-3-1-1::[CX276]	CX276	IRGC 135939	ind1B	0	A	IR8192-200-3-3-1-1::[CX276]	CX276	IRGC 135939	ind1B	16	C	T	T	-	-	-	C	C	C	T	C	-	-	-	-	C	-	G	C	T	T	-	A	-	G	G	C	T	T	C	G	T	G	G	G	G	T	T	-
02428-IL::[CX277]	CX277	IRGC 135810	japx	0	A	02428-IL::[CX277]	CX277	IRGC 135810	japx	1	C	T	T	-	-	-	C	C	C	T	C	-	-	-	-	C	-	G	C	T	T	-	A	-	G	G	C	T	T	C	G	T	G	G	G	G	G	-	-
GAYABYEO::[CX28]	CX28	IRGC 135892	ind1B	0	A	GAYABYEO::[CX28]	CX28	IRGC 135892	ind1B	1	C	T	T	-	-	-	C	C	C	T	C	-	-	-	-	C	-	G	C	T	T	-	A	-	G	G	C	T	T	C	G	T	G	G	G	G	G	-	-
MARAVILHA::[CX280]	CX280	IRGC 135981	admix	0		MARAVILHA::[CX280]	CX280	IRGC 135981	admix	0	C	T	T	-	-	-	C	C	C	T	C	-	-	-	-	C	-	G	C	T	T	-	A	-	G	G	C	T	T	C	G	T	G	G	G	G	G	-	-
IR68897B::[CX281]	CX281	IRGC 135934	ind1B	0	A	IR68897B::[CX281]	CX281	IRGC 135934	ind1B	16	C	T	T	-	-	-	C	C	C	T	C	-	-	-	-	C	-	G	C	T	T	-	A	-	G	G	C	T	T	C	G	T	G	G	G	G	T	T	-
HAN 502::[CX284]	CX284		japx	0		HAN 502::[CX284]	CX284		japx	21	C	T	T	-	-	-	C	C	C	T	C	-	-	-	-	A	A	G	C	T	T	-	A	-	G	G	C	T	T	C	G	T	G	G	G	G	G	-	-
NONGLINNUO::[CX285]	CX285	IRGC 136010	trop	0	A	NONGLINNUO::[CX285]	CX285	IRGC 136010	trop	1	C	T	T	-	-	-	C	C	C	T	C	-	-	-	-	C	-	G	C	T	T	-	A	-	G	G	C	T	T	C	G	T	G	G	G	G	G	-	-
C349::[CX286]	CX286		admix	0	A	C349::[CX286]	CX286		admix	0	C	T	T	-	-	-	C	C	C	T	C	-	-	-	-	C	-	G	C	T	T	-	A	-	G	G	C	T	T	C	G	T	G	G	G	G	G	-	-
C52::[CX287]	CX287		temp	0	A	C52::[CX287]	CX287		temp	1	C	T	T	-	-	-	C	C	C	T	C	-	-	-	-	C	-	G	C	T	T	-	A	-	G	G	C	T	T	C	G	T	G	G	G	G	G	-	-
D11::[CX288]	CX288	IRGC 135874	indx	0	A	D11::[CX288]	CX288	IRGC 135874	indx	5	C	T	T	-	-	-	C	C	C	T	C	-	-	-	-	C	-	G	C	T	T	-	A	-	G	G	C	T	T	C	G	T	G	G	G	G	T	T	-
MILYANG23::[CX29]	CX29	IRGC 135984	admix	0	A	MILYANG23::[CX29]	CX29	IRGC 135984	admix	4	C	T	T	-	-	-	C	C	C	T	C	-	-	-	-	C	-	G	C	T	T	-	A	-	G	G	C	T	T	C	G	T	G	G	G	G	G	-	-
DUO 57::[CX290]	CX290		ind1B	0	A	DUO 57::[CX290]	CX290		ind1B	1	C	T	T	-	-	-	C	C	C	T	C	-	-	-	-	C	-	G	C	T	T	-	A	-	G	G	C	T	T	C	G	T	G	G	G	G	G	-	-
D15::[CX291]	CX291	IRGC 135875	indx	0	A	D15::[CX291]	CX291	IRGC 135875	indx	1	C	T	T	-	-	-	C	C	C	T	C	-	-	-	-	C	-	G	C	T	T	-	A	-	G	G	C	T	T	C	G	T	G	G	G	G	G	-	-
IR74::[CX296]	CX296	IRGC 135937	indx	0	A	IR74::[CX296]	CX296	IRGC 135937	indx	13	C	T	T	-	-	-	C	C	C	T	C	-	-	-	-	C	-	G	C	T	T	-	A	-	G	G	C	T	T	C	G	T	G	G	G	G	T	T	-
BR24::[CX3]	CX3	IRGC 117623	ind1A	0	A	BR24::[CX3]	CX3	IRGC 117623	ind1A	13	C	T	T	-	-	-	C	C	C	T	C	-	-	-	-	C	-	G	C	T	T	-	A	-	G	G	C	T	T	C	G	T	G	G	G	G	T	T	-
MONGOLIA RICE::[CX306]	CX306	IRGC 135987	temp	0	A	MONGOLIA RICE::[CX306]	CX306	IRGC 135987	temp	1	C	T	T	-	-	-	C	C	C	T	C	-	-	-	-	C	-	G	C	T	T	-	A	-	G	G	C	T	T	C	G	T	G	G	G	G	G	-	-
HP121::[CX307]	CX307		japx	0	A	HP121::[CX307]	CX307		japx	1	C	T	T	-	-	-	C	C	C	T	C	-	-	-	-	C	-	G	C	T	T	-	A	-	G	G	C	T	T	C	G	T	G	G	G	G	G	-	-
R106::[CX313]	CX313		indx	0	A	R106::[CX313]	CX313		indx	1	C	T	T	-	-	-	C	C	C	T	C	-	-	-	-	C	-	G	C	T	T	-	A	-	G	G	C	T	T	C	G	T	G	G	G	G	G	-	-
MR39::[CX316]	CX316	IRGC 135993	admix	0	A	MR39::[CX316]	CX316	IRGC 135993	admix	0	C	T	T	-	-	-	C	C	C	T	C	-	-	-	-	C	-	G	C	T	T	-	A	-	G	G	C	T	T	C	G	T	G	G	G	G	G	-	-
MANAUTHUKHA::[CX32]	CX32	IRGC 135980	japx	0	A	MANAUTHUKHA::[CX32]	CX32	IRGC 135980	japx	0	C	T	T	-	-	-	C	C	C	T	C	-	-	-	-	C	-	G	C	T	T	-	A	-	G	G	C	T	T	C	G	T	G	G	G	G	G	-	-
BAOXUAN 21 B::[CX328]	CX328		ind1A	0	A	BAOXUAN 21 B::[CX328]	CX328		ind1A	12	C	T	T	-	-	-	C	C	C	T	C	-	-	-	-	C	-	G	C	T	T	-	A	-	G	G	C	T	T	C	G	T	G	G	G	G	T	T	-
SHWE THWE YIN HYV::[CX33]	CX33	IRGC 136045	ind1B	0	A	SHWE THWE YIN HYV::[CX33]	CX33	IRGC 136045	ind1B	4	C	T	T	-	-	-	C	C	C	T	C	-	-	-	-	C	-	G	C	T	T	-	A	-	G	G	C	T	T	C	G	T	G	G	G	G	G	-	-
YUEGUANG::[CX330]	CX330	IRGC 136084	temp	0	A	YUEGUANG::[CX330]	CX330	IRGC 136084	temp	0	C	T	T	-	-	-	C	C	C	T	C	-	-	-	-	C	-	G	C	T	T	-	A	-	G	G	C	T	T	C	G	T	G	G	G	G	G	-	-
WANXIAN 763::[CX342]	CX342	IRGC 136068	indx	0	A	WANXIAN 763::[CX342]	CX342	IRGC 136068	indx	1	C	T	T	-	-	-	C	C	C	T	C	-	-	-	-	C	-	G	C	T	T	-	A	-	G	G	C	T	T	C	G	T	G	G		G	G	-	-
HEXI 41::[CX344]	CX344		temp	0	A	HEXI 41::[CX344]	CX344		temp	1	C	T	T	-	-	-	C	C	C	T	C	-	-	-	-	C	-	G	C	T	T	-	A	-	G	G	C	T	T	C	G	T	G	G	G	G	G	-	-
YUNGENG 23::[CX345]	CX345		temp	0	A	YUNGENG 23::[CX345]	CX345		temp	1	C	T	T	-	-	-	C	C	C	T	C	-	-	-	-	C	-	G	C	T	T	-	A	-	G	G	C	T	T	C	G	T	G	G	G	G	G	-	-
SAGCï¼7::[CX347]	CX347	IRGC 136039	indx	0	A	SAGCï¼7::[CX347]	CX347	IRGC 136039	indx	15	C	T	T	-	-	-	C	C	C	T	C	-	-	-	-	A	A	G	C	T	T	-	A	-	G	G	C	T	T	C	G	T	G	G	G	G	G	-	-
053A-3::[CX351]	CX351	IRGC 135811	temp	0	A	053A-3::[CX351]	CX351	IRGC 135811	temp	1	C	T	T	-	-	-	C	C	C	T	C	-	-	-	-	C	-	G	C	T	T	-	A	-	G	G	C	T	T	C	G	T	G	G	G	G	G	-	-
BD007::[CX352]	CX352	IRGC 135839	trop	0	A	BD007::[CX352]	CX352	IRGC 135839	trop	0	C	T	T	-	-	-	C	C	C	T	C	-	-	-	-	C	-	G	C	T	T	-	A	-	G	G	C	T	T	C	G	T	G	G	G	G	G	-	-
CAU1::[CX353]	CX353	IRGC 135860	japx	0	A	CAU1::[CX353]	CX353	IRGC 135860	japx	1	C	T	T	-	-	-	C	C	C	T	C	-	-	-	-	C	-	G	C	T	T	-	A	-	G	G	C	T	T	C	G	T	G	G	G	G	G	-	-
YUNLU 102::[CX355]	CX355	IRGC 136085	trop	0	A	YUNLU 102::[CX355]	CX355	IRGC 136085	trop	1	C	T	T	-	-	-	C	C	C	T	C	-	-	-	-	C	-	G	C	T	T	-	A	-	G	G	C	T	T	C	G	T	G	G	G	G	G	-	-
YANDAO 8::[CX356]	CX356		temp	0	A	YANDAO 8::[CX356]	CX356		temp	2	C	T	T	-	-	-	C	C	C	T	C	-	-	-	-	C	-	G	C	T	T	-	A	-	G	G	C	T	T	C	G	T	G	G	G	G	G	-	-
YUNLU 103::[CX359]	CX359		trop	0	A	YUNLU 103::[CX359]	CX359		trop	0	C	T	T	-	-	-	C	C	C	T	C	-	-	-	-	C	-	G	C	T	T	-	A	-	G	G	C	T	T	C	G	T	G	G	G	G	G	-	-
NERICA 1::[CX371]	CX371	IRGC 136000	trop	0	A	NERICA 1::[CX371]	CX371	IRGC 136000	trop	0	C	T	T	-	-	-	C	C	C	T	C	-	-	-	-	C	-	G	C	T	T	-	A	-	G	G	C	T	T	C	G	T	G	G	G	G	G	-	-
NERICA 2::[CX372]	CX372	IRGC 136001	trop	0	A	NERICA 2::[CX372]	CX372	IRGC 136001	trop	0	C	T	T	-	-	-	C	C	C	T	C	-	-	-	-	C	-	G	C	T	T	-	A	-	G	G	C	T	T	C	G	T	G	G	G	G	G	-	-
NERICA 8::[CX373]	CX373	IRGC 136002	trop	0	A	NERICA 8::[CX373]	CX373	IRGC 136002	trop	1	C	T	T	-	-	-	C	C	C	T	C	-	-	-	-	C	-	G	C	T	T	-	A	-	G	G	C	T	T	C	G	T	G	G	G	G	G	-	-
NERICA 9::[CX374]	CX374	IRGC 136003	trop	0	A	NERICA 9::[CX374]	CX374	IRGC 136003	trop	1	C	T	T	-	-	-	C	C	C	T	C	-	-	-	-	C	-	G	C	T	T	-	A	-	G	G	C	T	T	C	G	T	G	G	G	G	G	-	-
HONGZA::[CX383]	CX383		temp	0	A	HONGZA::[CX383]	CX383		temp	0	C	T	T	-	-	-	C	C	C	T	C	-	-	-	-	C	-	G	C	T	T	-	A	-	G	G	C	T	T	C	G	T	G	G	G	G	G	-	-
FENGZA::[CX384]	CX384		temp	0	A	FENGZA::[CX384]	CX384		temp	0	C	T	T	-	-	-	C	C	C	T	C	-	-	-	-	C	-	G	C	T	T	-	A	-	G	G	C	T	T	C	G	T	G	G	G	G	G	-	-
JINYUAN 85::[CX389]	CX389	IRGC 135960	temp	0	A	JINYUAN 85::[CX389]	CX389	IRGC 135960	temp	0	C	T	T	-	-	-	C	C	C	T	C	-	-	-	-	C	-	G	C	T	T	-	A	-	G	G	C	T	T	C	G	T	G	G	G	G	G	-	-
YUELIANGGU::[CX390]	CX390		indx	0.5	A/C	YUELIANGGU::[CX390]	CX390		indx	16	C	T	T	-	-	-	C	C	C	T	C	-	-	-	-	C	-	G	C	T	T	-	A	-	G	G	C	T	T	C	G	T	G	G	G	G	G	-	-
YJ30::[CX391]	CX391	IRGC 136079	temp	0	A	YJ30::[CX391]	CX391	IRGC 136079	temp	1	C	T	T	-	-	-	C	C	C	T	C	-	-	-	-	C	-	G	C	T	T	-	A	-	G	G	C	T	T	C	G	T	G	G	G	G	G	-	-
GUANDONG 194 (SOFT RICE)::[CX396]	CX396	IRGC 135898	temp	0	A	GUANDONG 194 (SOFT RICE)::[CX396]	CX396	IRGC 135898	temp	0	C	T	T	-	-	-	C	C	C	T	C	-	-	-	-	C	-	G	C	T	T	-	A	-	G	G	C	T	T	C	G	T	G	G	G	G	G	-	-
NANGENG 46 (SOFT RICE)::[CX397]	CX397		temp	0	A	NANGENG 46 (SOFT RICE)::[CX397]	CX397		temp	0	C	T	T	-	-	-	C	C	C	T	C	-	-	-	-	C	-	G	C	T	T	-	A	-	G	G	C	T	T	C	G	T	G	G	G	G	G	-	-
TOG7291::[CX401]	CX401		indx	0.5	A/C	TOG7291::[CX401]	CX401		indx	38	C	T/-	T	-	-	-	C	C	C	T	C	-	-	-	-	A	A	G	C/-	T/-	T	-	A	-	G	G	C	T	T	C	G	T	G	G	G	G	G	-/T	-/T
TOG6542::[CX402]	CX402		admix	0	A	TOG6542::[CX402]	CX402		admix	76	C	-	T	-	-	-	C	C	C	T	C	-	-	-	-	A	A	G	-	-	T	-	A	-	G	-	-	-	T	C	G	T	G	G	G	G	T	T	-
CX427::[CX427]	CX427		temp	0	A	CX427::[CX427]	CX427		temp	0	C	T	T	-	-	-	C	C	C	T	C	-	-	-	-	C	-	G	C	T	T	-	A	-	G	G	C	T	T	C	G	T	G	G	G	G	G	-	-
CX428::[CX428]	CX428		temp	0	A	CX428::[CX428]	CX428		temp	0	C	T	T	-	-	-	C	C	C	T	C	-	-	-	-	C	-	G	C	T	T	-	A	-	G	G	C	T	T	C	G	T	G	G	G	G	G	-	-
CX429::[CX429]	CX429		temp	0	A	CX429::[CX429]	CX429		temp	0	C	T	T	-	-	-	C	C	C	T	C	-	-	-	-	C	-	G	C	T	T	-	A	-	G	G	C	T	T	C	G	T	G		G	G	G	-	-
IR66897B::[CX43]	CX43	IRGC 135931	ind1B	0	A	IR66897B::[CX43]	CX43	IRGC 135931	ind1B	16	C	T	T	-	-	-	C	C	C	T	C	-	-	-	-	C	-	G	C	T	T	-	A	-	G	G	C	T	T	C	G	T	G	G	G	G	T	T	-
DIANGENG::[CX47]	CX47	IRGC 135879	temp	0	A	DIANGENG::[CX47]	CX47	IRGC 135879	temp	1	C	T	T	-	-	-	C	C	C	T	C	-	-	-	-	C	-	G	C	T	T	-	A	-	G	G	C	T	T	C	G	T	G	G	G	G	G	-	-
PT60::[CX48]	CX48		indx	0	A	PT60::[CX48]	CX48		indx	1	C	T	T	-	-	-	C	C	C	T	C	-	-	-	-	C	-	G	C	T	T	-	A	-	G	G	C	T	T	C	G	T	G	G	G	G	G	-	-
AI ZI DAO::[CX50]	CX50		ind1B	0	A	AI ZI DAO::[CX50]	CX50		ind1B	4	C	T	T	-	-	-	C	C	C	T	C	-	-	-	-	C	-	G	C	T	T	-	A	-	G	G	C	T	T	C	G	T	G	G	G	G	G	-	-
BABAOMI::[CX51]	CX51	IRGC 135835	indx	0	A	BABAOMI::[CX51]	CX51	IRGC 135835	indx	4.5	C	T	T	-	-	-	C	C	C	T	C	-	-	-	-	C	-	G	C	T	T	-	A	-	G	G	C	T	T	C	G	T	G	G	G	G	G	-	-
TONGNIAN 1::[CX534]	CX534	IRGC 136059	temp	0	A	TONGNIAN 1::[CX534]	CX534	IRGC 136059	temp	1	C	T	T	-	-	-	C	C	C	T	C	-	-	-	-	C	-	G	C	T	T	-	A	-	G	G	C	T	T	C	G	T	G	G	G	G	G	-	-
ZHONGJIAN 100::[CX548]	CX548	IRGC 136094	indx	0	A	ZHONGJIAN 100::[CX548]	CX548	IRGC 136094	indx	9	C	T	T	-	-	-	C	C	C	T	C	-	-	-	-	C	-	G	C	T	T	-	A	-	G	G	C	T	T	C	G	T	G	G	G	G	G	-	-
PENGSHANTIEGANZHAN::[CX55]	CX55		ind1A	0	A	PENGSHANTIEGANZHAN::[CX55]	CX55		ind1A	4	C	T	T	-	-	-	C	C	C	T	C	-	-	-	-	C	-	G	C	T	T	-	A	-	G	G	C	T	T	C	G	T	G	G	G	G	G	-	-
YUNGUANG 8::[CX56]	CX56		temp	0	A	YUNGUANG 8::[CX56]	CX56		temp	1	C	T	T	-	-	-	C	C	C	T	C	-	-	-	-	C	-	G	C	T	T	-	A	-	G	G	C	T	T	C	G	T	G	G	G	G	G	-	-
GIZA159::[CX58]	CX58	IRGC 135895	temp	0	A	GIZA159::[CX58]	CX58	IRGC 135895	temp	1	C	T	T	-	-	-	C	C	C	T	C	-	-	-	-	C	-	G	C	T	T	-	A	-	G	G	C	T	T	C	G	T	G	G	G	G	G	-	-
C418::[CX6]	CX6		admix	0	A	C418::[CX6]	CX6		admix	0	C	T	T	-	-	-	C	C	C	T	C	-	-	-	-	C	-	G	C	T	T	-	A	-	G	G	C	T	T	C	G	T	G	G	G	G	G	-	-
BHAVANI::[CX61]	CX61	IRGC 135844	ind1A	0	A	BHAVANI::[CX61]	CX61	IRGC 135844	ind1A	4	C	T	T	-	-	-	C	C	C	T	C	-	-	-	-	C	-	G	C	T	T	-	A	-	G	G	C	T	T	C	G	T	G	G	G	G	G	-	-
JP-5::[CX74]	CX74	IRGC 135961	temp	0	A	JP-5::[CX74]	CX74	IRGC 135961	temp	1	C	T	T	-	-	-	C	C	C	T	C	-	-	-	-	C	-	G	C	T	T	-	A	-	G	G	C	T	T	C	G	T	G	G	G	G	G	-	-
LEMONT::[CX77]	CX77	IRGC 117802	trop	0	A	LEMONT::[CX77]	CX77	IRGC 117802	trop	0	C	T	T	-	-	-	C	C	C	T	C	-	-	-	-	C	-	G	C	T	T	-	A	-	G	G	C	T	T	C	G	T	G	G	G	G	G	-	-
M401::[CX78]	CX78	IRGC 135978	temp	0	A	M401::[CX78]	CX78	IRGC 135978	temp	9.5	C	T	T	-	-	-	C	C	C	T	C	-	-	-	-	C	-/A	G	C	T	T	-/A	A	-/A	G	G	C	T	T	C	G	T	G	G	G	G	G	-/A	-
CHENGHUI 448::[CX8]	CX8		indx	0	A	CHENGHUI 448::[CX8]	CX8		indx	0	C	T	T	-	-	-	C	C	C	T	C	-	-	-	-	C	-	G	C	T	T	-	A	-	G	G	C	T	T	C	G	T	G	G	G	G	G	-	-
CHHOMROMG::[CX90]	CX90	IRGC 135863	ind1B	0	A	CHHOMROMG::[CX90]	CX90	IRGC 135863	ind1B	1	C	T	T	-	-	-	C	C	C	T	C	-	-	-	-	C	-	G	C	T	T	-	A	-	G	G	C	T	T	C	G	T	G	G	G	G	G	-	-
UPR 191-66::[CX92]	CX92	IRGC 136063	ind1B	0	A	UPR 191-66::[CX92]	CX92	IRGC 136063	ind1B	17	C	T	T	-	-	-	C	C	C	T	C	-	-	-	-	A	A	G	C	T	T	-	A	-	G	G	C	T	T	C	G	T	G	G	G	G	G	-	-
SWARNA::[CX94]	CX94	IRGC 117278	indx	0	A	SWARNA::[CX94]	CX94	IRGC 117278	indx	13	C	T	T	-	-	-	C	C	C	T	C	-	-	-	-	C	-	G	C	T	T	-	A	-	G	G	C	T	T	C	G	T	G	G	G	G	T	T	-
DODDABYRANELLA::[CX98]	CX98	IRGC 135882	ind2	0	A	DODDABYRANELLA::[CX98]	CX98	IRGC 135882	ind2	24	C	T	T	-	-	-	C	C	C	T	C	-	-	-	-	A	A	G	C	T	T	-	A	-	G	G	C	T	T	C	G	T	G	G	G	G	G	-	-
SANT ANDREA::IRGC 65732-1::[IRIS 313-10014]	IRIS 313-10014	IRGC 125898	temp	0	A	SANT ANDREA::IRGC 65732-1::[IRIS 313-10014]	IRIS 313-10014	IRGC 125898	temp	0	C	T	T	-	-	-	C	C	C	T	C	-	-	-	-	C	-	G	C	T	T	-	A	-	G	G	C	T	T	C	G	T	G	G	G	G	G	-	-
HODARAWALA::IRGC 67631-1::[IRIS 313-10020]	IRIS 313-10020	IRGC 120968	aus	0	A	HODARAWALA::IRGC 67631-1::[IRIS 313-10020]	IRIS 313-10020	IRGC 120968	aus	13	C	T	T	-	-	-	C	C	C	T	C	-	-	-	-	C	-	G	C	T	T	-	A	-	G	G	C	T	T	C	G	T	G	G	G	G	T	T	-
KALAPATLE::IRGC 68500-1::[IRIS 313-10025]	IRIS 313-10025	IRGC 125790	admix	0	A	KALAPATLE::IRGC 68500-1::[IRIS 313-10025]	IRIS 313-10025	IRGC 125790	admix	0	C	T	T	-	-	-	C	C	C	T	C	-	-	-	-	C	-	G	C	T	T	-	A	-	G	G	C	T	T	C	G	T	G	G	G	G	G	-	-
KITRANA 1007::IRGC 68517-1::[IRIS 313-10026]	IRIS 313-10026	IRGC 125804	ind2	0	A	KITRANA 1007::IRGC 68517-1::[IRIS 313-10026]	IRIS 313-10026	IRGC 125804	ind2	24	C	T	T	-	-	-	C	C	C	T	C	-	-	-	-	A	A	G	C	T	T	-	A	-	G	G	C	T	T	C	G	T	G	G	G	G	G	-	-
NS 252::IRGC 68878-1::[IRIS 313-10030]	IRIS 313-10030	IRGC 121075	ind2	0	A	NS 252::IRGC 68878-1::[IRIS 313-10030]	IRIS 313-10030	IRGC 121075	ind2	15	C	T	T	-	-	-	C	C	C	T	C	-	-	-	-	A	A	G	C	T	T	-	A	-	G	G	C	T	T	C	G	T	G	G	G	G	G	-	-
RIZ TYPE SORGHO::IRGC 69015-1::[IRIS 313-10035]	IRIS 313-10035	IRGC 125887	ind2	0	A	RIZ TYPE SORGHO::IRGC 69015-1::[IRIS 313-10035]	IRIS 313-10035	IRGC 125887	ind2	0	C	T	T	-	-	-	C	C	C	T	C	-	-	-	-	C	-	G	C	T	T	-	A	-	G	G	C	T	T	C	G	T	G	G	G	G	G	-	-
BOTOHAVANA MENA::IRGC 69349-1::[IRIS 313-10041]	IRIS 313-10041	IRGC 126049	trop	0	A	BOTOHAVANA MENA::IRGC 69349-1::[IRIS 313-10041]	IRIS 313-10041	IRGC 126049	trop	0	C	T	T	-	-	-	C	C	C	T	C	-	-	-	-	C	-	G	C	T	T	-	A	-	G	G	C	T	T	C	G	T	G	G	G	G	G	-	-
CHAMA (DWARF)::IRGC 69487-1::[IRIS 313-10046]	IRIS 313-10046	IRGC 125958	ind1B	0	A	CHAMA (DWARF)::IRGC 69487-1::[IRIS 313-10046]	IRIS 313-10046	IRGC 125958	ind1B	11	C	T	T	-	-	-	C	C	C	T	C	-	-	-	-	C	-	G	C	T	T	-	A	-	G	G	C	T	T	C	G	T	G	G	G	G	G	-	-
EX MARABA GURUKU::IRGC 69582-1::[IRIS 313-10047]	IRIS 313-10047	IRGC 125737	ind1A	0	A	EX MARABA GURUKU::IRGC 69582-1::[IRIS 313-10047]	IRIS 313-10047	IRGC 125737	ind1A	4	C	T	T	-	-	-	C	C	C	T	C	-	-	-	-	C	-	G	C	T	T	-	A	-	G	G	C	T	T	C	G	T	G	G	G	G	G	-	-
HOKURIKU 52::IRGC 72491-1::[IRIS 313-10056]	IRIS 313-10056	IRGC 125763	subtrop	0	A	HOKURIKU 52::IRGC 72491-1::[IRIS 313-10056]	IRIS 313-10056	IRGC 125763	subtrop	1	C	T	T	-	-	-	C	C	C	T	C	-	-	-	-	C	-	G	C	T	T	-	A	-	G	G	C	T	T	C	G	T	G	G	G	G	G	-	-
ESTRELA A::IRGC 72918-1::[IRIS 313-10061]	IRIS 313-10061	IRGC 125733	japx	0	A	ESTRELA A::IRGC 72918-1::[IRIS 313-10061]	IRIS 313-10061	IRGC 125733	japx	0	C	T	T	-	-	-	C	C	C	T	C	-	-	-	-	C	-	G	C	T	T	-	A	-	G	G	C	T	T	C	G	T	G	G	G	G	G	-	-
REA::IRGC 73031-1::[IRIS 313-10062]	IRIS 313-10062	IRGC 126141	trop	0	A	REA::IRGC 73031-1::[IRIS 313-10062]	IRIS 313-10062	IRGC 126141	trop	15	C	T	T	-	-	-	C	C	C	T	C	-	-	-	-	A	A	G	C	T	T	-	A	-	G	G	C	T	T	C	G	T	G	G	G	G	G	-	-
JAERAERYUKDO::IRGC 73053-1::[IRIS 313-10065]	IRIS 313-10065	IRGC 127055	trop	0	A	JAERAERYUKDO::IRGC 73053-1::[IRIS 313-10065]	IRIS 313-10065	IRGC 127055	trop	1	C	T	T	-	-	-	C	C	C	T	C	-	-	-	-	C	-	G	C	T	T	-	A	-	G	G	C	T	T	C	G	T	G	G	G	G	G	-	-
JEONBUKGUNGWEONNA::IRGC 73055-1::[IRIS 313-10067]	IRIS 313-10067	IRGC 125783	trop	0	A	JEONBUKGUNGWEONNA::IRGC 73055-1::[IRIS 313-10067]	IRIS 313-10067	IRGC 125783	trop	1	C	T	T	-	-	-	C	C	C	T	C	-	-	-	-	C	-	G	C	T	T	-	A	-	G	G	C	T	T	C	G	T	G	G	G	G	G	-	-
CHIYODA WASE::IRGC 74467-1::[IRIS 313-10071]	IRIS 313-10071	IRGC 125705	trop	0	A	CHIYODA WASE::IRGC 74467-1::[IRIS 313-10071]	IRIS 313-10071	IRGC 125705	trop	1	C	T	T	-	-	-	C	C	C	T	C	-	-	-	-	C	-	G	C	T	T	-	A	-	G	G	C	T	T	C	G	T	G	G	G	G	G	-	-
OWARI MOCHI::IRGC 74513-1::[IRIS 313-10073]	IRIS 313-10073	IRGC 125864	trop	0	A	OWARI MOCHI::IRGC 74513-1::[IRIS 313-10073]	IRIS 313-10073	IRGC 125864	trop	1	C	T	T	-	-	-	C	C	C	T	C	-	-	-	-	C	-	G	C	T	T	-	A	-	G	G	C	T	T	C	G	T	G	G	G	G	G	-	-
RIKU AIKOKU::IRGC 74514-1::[IRIS 313-10074]	IRIS 313-10074	IRGC 125884	trop	0	A	RIKU AIKOKU::IRGC 74514-1::[IRIS 313-10074]	IRIS 313-10074	IRGC 125884	trop	1	C	T	T	-	-	-	C	C	C	T	C	-	-	-	-	C	-	G	C	T	T	-	A	-	G	G	C	T	T	C	G	T	G	G	G	G	G	-	-
SANGOKU::IRGC 74518-1::[IRIS 313-10075]	IRIS 313-10075	IRGC 125895	trop	0	A	SANGOKU::IRGC 74518-1::[IRIS 313-10075]	IRIS 313-10075	IRGC 125895	trop	1	C	T	T	-	-	-	C	C	C	T	C	-	-	-	-	C	-	G	C	T	T	-	A	-	G	G	C	T	T	C	G	T	G	G	G	G	G	-	-
SHINA MOCHI::IRGC 74523-1::[IRIS 313-10076]	IRIS 313-10076	IRGC 125900	trop	0	A	SHINA MOCHI::IRGC 74523-1::[IRIS 313-10076]	IRIS 313-10076	IRGC 125900	trop	1	C	T	T	-	-	-	C	C	C	T	C	-	-	-	-	C	-	G	C	T	T	-	A	-	G	G	C	T	T	C	G	T	G	G	G	G	G	-	-
YOSHINO MOCHI::IRGC 74550-1::[IRIS 313-10078]	IRIS 313-10078	IRGC 125947	trop	0	A	YOSHINO MOCHI::IRGC 74550-1::[IRIS 313-10078]	IRIS 313-10078	IRGC 125947	trop	1	C	T	T	-	-	-	C	C	C	T	C	-	-	-	-	C	-	G	C	T	T	-	A	-	G	G	C	T	T	C	G	T	G	G	G	G	G	-	-
DANGO MOCHI::IRGC 74551-1::[IRIS 313-10079]	IRIS 313-10079	IRGC 125722	trop	0	A	DANGO MOCHI::IRGC 74551-1::[IRIS 313-10079]	IRIS 313-10079	IRGC 125722	trop	1	C	T	T	-	-	-	C	C	C	T	C	-	-	-	-	C	-	G	C	T	T	-	A	-	G	G	C	T	T	C	G	T	G	G	G	G	G	-	-
HIRAKAWA OKUTE::IRGC 74554-1::[IRIS 313-10080]	IRIS 313-10080	IRGC 125762	trop	0	A	HIRAKAWA OKUTE::IRGC 74554-1::[IRIS 313-10080]	IRIS 313-10080	IRGC 125762	trop	1	C	T	T	-	-	-	C	C	C	T	C	-	-	-	-	C	-	G	C	T	T	-	A	-	G	G	C	T	T	C	G	T	G	G	G	G	G	-	-
KYUUSHUU::IRGC 74558-1::[IRIS 313-10082]	IRIS 313-10082	IRGC 125816	trop	0	A	KYUUSHUU::IRGC 74558-1::[IRIS 313-10082]	IRIS 313-10082	IRGC 125816	trop	1	C	T	T	-	-	-	C	C	C	T	C	-	-	-	-	C	-	G	C	T	T	-	A	-	G	G	C	T	T	C	G	T	G	G	G	G	G	-	-
BETIS::IRGC 74581-1::[IRIS 313-10083]	IRIS 313-10083	IRGC 125679	temp	0	A	BETIS::IRGC 74581-1::[IRIS 313-10083]	IRIS 313-10083	IRGC 125679	temp	0	C	T	T	-	-	-	C	C	C	T	C	-	-	-	-	C	-	G	C	T	T	-	A	-	G	G	C	T	T	C	G	T	G	G	G	G	G	-	-
KALIN::IRGC 77312-1::[IRIS 313-10089]	IRIS 313-10089	IRGC 125791	temp	0	A	KALIN::IRGC 77312-1::[IRIS 313-10089]	IRIS 313-10089	IRGC 125791	temp	0	C	T	T	-	-	-	C	C	C	T	C	-	-	-	-	C	-	G	C	T	T	-	A	-	G	G	C	T	T	C	G	T	G	G	G	G	G	-	-
CHALBYEO::IRGC 77639-1::[IRIS 313-10092]	IRIS 313-10092	IRGC 125698	temp	0	A	CHALBYEO::IRGC 77639-1::[IRIS 313-10092]	IRIS 313-10092	IRGC 125698	temp	1	C	T	T	-	-	-	C	C	C	T	C	-	-	-	-	C	-	G	C	T	T	-	A	-	G	G	C	T	T	C	G	T		G	G	G	G	-	-
CHEONJUDO::IRGC 77644-1::[IRIS 313-10093]	IRIS 313-10093	IRGC 125700	temp	0	A	CHEONJUDO::IRGC 77644-1::[IRIS 313-10093]	IRIS 313-10093	IRGC 125700	temp	0	C	T	T	-	-	-	C	C	C	T	C	-	-	-	-	C	-	G	C	T	T	-	A	-	G	G	C	T	T	C	G	T	G	G	G	G	G	-	-
GAWICHAL::IRGC 77653-1::[IRIS 313-10094]	IRIS 313-10094	IRGC 125750	trop	0	A	GAWICHAL::IRGC 77653-1::[IRIS 313-10094]	IRIS 313-10094	IRGC 125750	trop	1	C	T	T	-	-	-	C	C	C	T	C	-	-	-	-	C	-	G	C	T	T	-	A	-	G	G	C	T	T	C	G	T	G	G	G	G	G	-	-
JOKJEBICHAL::IRGC 77663-1::[IRIS 313-10096]	IRIS 313-10096	IRGC 125787	japx	0	A	JOKJEBICHAL::IRGC 77663-1::[IRIS 313-10096]	IRIS 313-10096	IRGC 125787	japx	1	C	T	T	-	-	-	C	C	C	T	C	-	-	-	-	C	-	G	C	T	T	-	A	-	G	G	C	T	T	C	G	T	G		G	G	G	-	-
MAEKJO::IRGC 77666-1::[IRIS 313-10097]	IRIS 313-10097	IRGC 125830	temp	0	A	MAEKJO::IRGC 77666-1::[IRIS 313-10097]	IRIS 313-10097	IRGC 125830	temp	1	C	T	T	-	-	-	C	C	C	T	C	-	-	-	-	C	-	G	C	T	T	-	A	-	G	G	C	T	T	C	G	T	G	G	G		G	-	-
MANONGAZATO::IRGC 77876-1::[IRIS 313-10099]	IRIS 313-10099	IRGC 126303	trop	0	A	MANONGAZATO::IRGC 77876-1::[IRIS 313-10099]	IRIS 313-10099	IRGC 126303	trop	1	C	T	T	-	-	-	C	C	C	T	C	-	-	-	-	C	-	G	C	T	T	-	A	-	G	G	C	T	T	C	G	T	G	G	G	G	G	-	-
KELIRENY::IRGC 78426-1::[IRIS 313-10102]	IRIS 313-10102	IRGC 127056	ind2	0	A	KELIRENY::IRGC 78426-1::[IRIS 313-10102]	IRIS 313-10102	IRGC 127056	ind2	4	C	T	T	-	-	-	C	C	C	T	C	-	-	-	-	C	-	G	C	T	T	-	A	-	G	G	C	T	T	C	G	T	G	G	G	G	G	-	-
MOLO::IRGC 81603-1::[IRIS 313-10111]	IRIS 313-10111	IRGC 125843	japx	0	A	MOLO::IRGC 81603-1::[IRIS 313-10111]	IRIS 313-10111	IRGC 125843	japx	10	C	T	T	-	-	-	C	C	C	T	C	-	-	-	-	A	A	G	C	T	T	-	A	-	G	G	C	T	T	C	G	T	G	G	G	G	G	-	-
FACAGRO 64::IRGC 82059-1::[IRIS 313-10114]	IRIS 313-10114	IRGC 125739	ind2	0	A	FACAGRO 64::IRGC 82059-1::[IRIS 313-10114]	IRIS 313-10114	IRGC 125739	ind2	23	C	T	T	-	-	-	C	C	C	T	C	-	-	-	-	A	A	G	C	T	T	-	A	-	G	G	C	T	T	C	G	T	G	G	G	G	G	-	-
GITANO::IRGC 82424-1::[IRIS 313-10119]	IRIS 313-10119	IRGC 125752	japx	0		GITANO::IRGC 82424-1::[IRIS 313-10119]	IRIS 313-10119	IRGC 125752	japx	0	C	T	T	-	-	-	C	C	C	T	C	-	-	-	-	C	-	G	C	T	T	-	A	-	G	G	C	T	T	C	G	T	G	G	G	G	G	-	-
SAN SHIH TSI::IRGC 1038-1::[IRIS 313-10129]	IRIS 313-10129	IRGC 125897	ind1A	0	A	SAN SHIH TSI::IRGC 1038-1::[IRIS 313-10129]	IRIS 313-10129	IRGC 125897	ind1A	15	C	T	T	-	-	-	C	C	C	T	C	-	-	-	-	A	A	G	C	T	T	-	A	-	G	G	C	T	T	C	G	T	G	G	G	G	G	-	-
CAUVERY::IRGC 45255-1::[IRIS 313-10148]	IRIS 313-10148	IRGC 125695	indx	0	A	CAUVERY::IRGC 45255-1::[IRIS 313-10148]	IRIS 313-10148	IRGC 125695	indx	4	C	T	T	-	-	-	C	C	C	T	C	-	-	-	-	C	-	G	C	T	T	-	A	-	G	G	C	T	T	C	G	T	G	G	G	G	G	-	-
HAN NUO::IRGC 59591-1::[IRIS 313-10164]	IRIS 313-10164	IRGC 125757	temp	0	A	HAN NUO::IRGC 59591-1::[IRIS 313-10164]	IRIS 313-10164	IRGC 125757	temp	0	C	T	T	-	-	-	C	C	C	T	C	-	-	-	-	C	-	G	C	T	T	-	A	-	G	G	C	T	T	C	G	T	G	G	G	G	G	-	-
MIN ZAO 6::IRGC 63772-1::[IRIS 313-10170]	IRIS 313-10170	IRGC 125842	ind1A	0	A	MIN ZAO 6::IRGC 63772-1::[IRIS 313-10170]	IRIS 313-10170	IRGC 125842	ind1A	4	C	T	T	-	-	-	C	C	C	T	C	-	-	-	-	C	-	G	C	T	T	-	A	-	G	G	C	T	T	C	G	T	G	G	G	G	G	-	-
NAM ROO::IRGC 66996-1::[IRIS 313-10176]	IRIS 313-10176	IRGC 125848	subtrop	0	A	NAM ROO::IRGC 66996-1::[IRIS 313-10176]	IRIS 313-10176	IRGC 125848	subtrop	15	C	T	T	-	-	-	C	C	C	T	C	-	-	-	-	A	A	G	C	T	T	-			G	G	C	T	T	C	G	T	G	G	G	G	G	-	-
DENG DENG QI::IRGC 72036-1::[IRIS 313-10190]	IRIS 313-10190	IRGC 125726	ind1A	0	A	DENG DENG QI::IRGC 72036-1::[IRIS 313-10190]	IRIS 313-10190	IRGC 125726	ind1A	13	C	T	T	-	-	-	C	C	C	T	C	-	-	-	-			G	C	T	T	-	A	-	G	G	C	T	T	C	G	T	G	G	G	G	G	-	-
MIN KE ZHAN::IRGC 72230-1::[IRIS 313-10191]	IRIS 313-10191	IRGC 125841	ind1A	0	A	MIN KE ZHAN::IRGC 72230-1::[IRIS 313-10191]	IRIS 313-10191	IRGC 125841	ind1A	4	C	T	T	-	-	-	C	C	C	T	C	-	-	-	-	C	-	G	C	T	T	-	A	-	G	G	C	T	T	C	G	T	G	G	G	G	T	T	-
GUO DI HEI::IRGC 72697-1::[IRIS 313-10196]	IRIS 313-10196		trop	0	A	GUO DI HEI::IRGC 72697-1::[IRIS 313-10196]	IRIS 313-10196		trop	0	C	T	T	-	-	-	C	C	C	T	C	-	-	-	-	C	-	G	C	T	T	-	A	-	G	G	C	T	T	C	G	T	G	G	G	G
H 305-84::IRGC 116988-1::[IRIS 313-10242]	IRIS 313-10242	IRGC 127074	temp	0	A	H 305-84::IRGC 116988-1::[IRIS 313-10242]	IRIS 313-10242	IRGC 127074	temp	1	C	T	T	-	-	-	C	C	C	T	C	-	-	-	-	C	-	G	C	T	T	-	A	-	G	G	C	T	T	C	G	T	G	G	G	G	G	-	-
BULI INIA::IRGC 116961-1::[IRIS 313-10258]	IRIS 313-10258	IRGC 126050	temp	0	A	BULI INIA::IRGC 116961-1::[IRIS 313-10258]	IRIS 313-10258	IRGC 126050	temp	0	C	T	T	-	-	-	C	C	C	T	C	-	-	-	-	C	-	G	C	T	T	-	A	-	G	G	C	T	T	C	G	T	G	G	G	G	G	-	-
PDR 34-2-1-2::IRGC 117020-1::[IRIS 313-10295]	IRIS 313-10295	IRGC 127065	admix	0	A	PDR 34-2-1-2::IRGC 117020-1::[IRIS 313-10295]	IRIS 313-10295	IRGC 127065	admix	0	C	T	T	-	-	-	C	C	C	T	C	-	-	-	-	C	-	G	C	T	T	-	A	-	G	G	C	T	T	C	G	T	G	G	G	G	G	-	-
CAROLINO BLANCO::IRGC 117249-1::[IRIS 313-10327]	IRIS 313-10327	IRGC 127042	trop	0	A	CAROLINO BLANCO::IRGC 117249-1::[IRIS 313-10327]	IRIS 313-10327	IRGC 127042	trop	24	C	T	T	-	-	-	C	C	C	T	C	-	-	-	-	A	A	G	C	T	T	-	A	-	G	G	C	T	T	C	G	T	G	G	G	G	G	-	-
B 6136 E-3-TB-0-1-5::IRGC 117311-1::[IRIS 313-10334]	IRIS 313-10334	IRGC 125952	ind1B	0	A	B 6136 E-3-TB-0-1-5::IRGC 117311-1::[IRIS 313-10334]	IRIS 313-10334	IRGC 125952	ind1B	3	C	T	T	-	-	-	C	C	C	T	C	-	-	-	-	C	-	G	C	T	T	-	A	-	G	G	C	T	T	C	G	T	G	G	G	G	G	-	-
B 6144-MR-6-0-0::IRGC 117371-1::[IRIS 313-10336]	IRIS 313-10336		trop	0	A	B 6144-MR-6-0-0::IRGC 117371-1::[IRIS 313-10336]	IRIS 313-10336		trop	1	C	T	T	-	-	-	C	C	C	T	C	-	-	-	-	C	-	G	C	T	T	-	A	-	G	G	C	T	T	C	G	T	G	G	G	G	G	-	-
BR 4973-34-6-6::IRGC 117317-1::[IRIS 313-10340]	IRIS 313-10340	IRGC 127040	indx	0	A	BR 4973-34-6-6::IRGC 117317-1::[IRIS 313-10340]	IRIS 313-10340	IRGC 127040	indx	5	C	T	T	-	-	-	C	C	C	T	C	-	-	-	-	C	-	G	C	T	T	-	A	-	G	G	C	T	T	C	G	T	G	G	G	G	T	T	-
CSR-89 IR-15::IRGC 117326-1::[IRIS 313-10348]	IRIS 313-10348	IRGC 125959	indx	0	A	CSR-89 IR-15::IRGC 117326-1::[IRIS 313-10348]	IRIS 313-10348	IRGC 125959	indx	10	C	T	T	-	-	-	C	C	C	T	C	-	-	-	-	C	-	G	C	T	T	-	A	-	G	G	C	T	T	C	G	T	G	G	G	G	G	-	-
IR 52718-B-B-6-B-B-1-1::IRGC 117334-1::[IRIS 313-10357]	IRIS 313-10357	IRGC 126024	indx	0	A	IR 52718-B-B-6-B-B-1-1::IRGC 117334-1::[IRIS 313-10357]	IRIS 313-10357	IRGC 126024	indx	6	C	T	T	-	-	-	C	C	C	T	C	-	-	-	-	C	-	G	C	T	T	-	A	-	G	G	C	T	T	C	G	T	G	G	G	G	G	-	-
IR 68333-R-R-B-19::IRGC 117381-1::[IRIS 313-10373]	IRIS 313-10373	IRGC 126027	temp	0	A	IR 68333-R-R-B-19::IRGC 117381-1::[IRIS 313-10373]	IRIS 313-10373	IRGC 126027	temp	0	C	T	T	-	-	-	C	C	C	T	C	-	-	-	-	C	-	G	C	T	T	-	A	-	G	G	C	T	T	C	G	T	G		G	G	G	-	-
IR 77390-1-6-4-19-1-B::IRGC 117303-1::[IRIS 313-10392]	IRIS 313-10392	IRGC 127075	ind1B	0	A	IR 77390-1-6-4-19-1-B::IRGC 117303-1::[IRIS 313-10392]	IRIS 313-10392	IRGC 127075	ind1B	77	C	-	T	-	-	-	C	C	C	T	C	-	-	-	-	A	A	G	-	-	T	-	A	-	G	G	C	T	T	C	G	T	G	G	G	G	G	-	-
IR 80340-23-B-12-6-B::IRGC 117309-1::[IRIS 313-10396]	IRIS 313-10396	IRGC 125987	indx	0	A	IR 80340-23-B-12-6-B::IRGC 117309-1::[IRIS 313-10396]	IRIS 313-10396	IRGC 125987	indx	60	C	-	T	-	-	-	C	C	C	T	C	-	-	-	-	A	A	G	-	-	T	-	A	-	G	-	-	-	T	C	G	T	G	G	G	G	T	T	-
TAICHUNG 150::IRGC 80-1::[IRIS 313-10429]	IRIS 313-10429	IRGC 127834	temp	0	A	TAICHUNG 150::IRGC 80-1::[IRIS 313-10429]	IRIS 313-10429	IRGC 127834	temp	0	C	T	T	-	-	-	C	C	C	T	C	-	-	-	-	C	-	G	C	T	T	-	A	-	G	G	C	T	T	C	G	T	G	G	G	G	G	-	-
GINMASARI::IRGC 242-1::[IRIS 313-10430]	IRIS 313-10430	IRGC 128299	temp	0	A	GINMASARI::IRGC 242-1::[IRIS 313-10430]	IRIS 313-10430	IRGC 128299	temp	0	C	T	T	-	-	-	C	C	C	T	C	-	-	-	-	C	-	G	C	T	T	-	A	-	G	G	C	T	T	C	G	T	G	G	G	G	G	-	-
CI 7061::IRGC 968-1::[IRIS 313-10449]	IRIS 313-10449	IRGC 128264	ind1A	0	A	CI 7061::IRGC 968-1::[IRIS 313-10449]	IRIS 313-10449	IRGC 128264	ind1A	0	C	T	T	-	-	-	C	C	C	T	C	-	-	-	-	C	-	G	C	T	T	-	A	-	G	G	C	T	T	C	G	T	G	G	G	G	G	-	-
CHAN KU::IRGC 1069-1::[IRIS 313-10450]	IRIS 313-10450	IRGC 127258	ind1A	0	A	CHAN KU::IRGC 1069-1::[IRIS 313-10450]	IRIS 313-10450	IRGC 127258	ind1A	0	C	T	T	-	-	-	C	C	C	T	C	-	-	-	-	C	-	G	C	T	T	-	A	-	G	G	C	T	T	C	G	T	G	G	G	G	G	-	-
LU TAO 2::IRGC 1175-1::[IRIS 313-10453]	IRIS 313-10453	IRGC 128371	japx	0	A	LU TAO 2::IRGC 1175-1::[IRIS 313-10453]	IRIS 313-10453	IRGC 128371	japx	1	C	T	T	-	-	-	C	C	C	T	C	-	-	-	-	C	-	G	C	T	T	-	A	-	G	G	C	T	T	C	G	T	G	G	G	G	G	-	-
P 168::IRGC 1354-1::[IRIS 313-10458]	IRIS 313-10458	IRGC 127695	ind1A	0	A	P 168::IRGC 1354-1::[IRIS 313-10458]	IRIS 313-10458	IRGC 127695	ind1A	15	C	T	T	-	-	-	C	C	C	T	C	-	-	-	-	A	A	G	C	T	T	-	A	-	G	G	C	T	T	C	G	T	G	G	G	G	G	-	-
PI 160862-1::IRGC 1452-1::[IRIS 313-10459]	IRIS 313-10459		japx	0	A	PI 160862-1::IRGC 1452-1::[IRIS 313-10459]	IRIS 313-10459		japx	0	C	T	T	-	-	-	C	C	C	T	C	-	-	-	-	C	-	G	C	T	T	-	A	-	G	G	C	T	T	C	G	T	G	G	G	G	G	-	-
KINUGASAWASE::IRGC 2609-1::[IRIS 313-10469]	IRIS 313-10469	IRGC 128347	temp	0	A	KINUGASAWASE::IRGC 2609-1::[IRIS 313-10469]	IRIS 313-10469	IRGC 128347	temp	1	C	T	T	-	-	-	C	C	C	T	C	-	-	-	-	C	-	G	C	T	T	-	A	-	G	G	C	T	T	C	G	T	G	G	G	G	G	-	-
RUSTY LATE::IRGC 3506-1::[IRIS 313-10477]	IRIS 313-10477	IRGC 128454	indx	0	A	RUSTY LATE::IRGC 3506-1::[IRIS 313-10477]	IRIS 313-10477	IRGC 128454	indx	11	C	T	T	-	-	-	C	C	C	T	C	-	-	-	-	A	A	G	C	T	T	-	A	-	G	G	C	T	T	C	G	T	G	G	G	G	G	-	-
PILIT (7480) SELN (CI 12007)::IRGC 3758-1::[IRIS 313-10484]	IRIS 313-10484	IRGC 127729	ind1A	0	A	PILIT (7480) SELN (CI 12007)::IRGC 3758-1::[IRIS 313-10484]	IRIS 313-10484	IRGC 127729	ind1A	0	C	T	T	-	-	-	C	C	C	T	C	-	-	-	-	C	-	G	C	T	T	-	A	-	G	G	C	T	T	C	G	T	G		G	G	G	-	-
CATIBOS::IRGC 3762-1::[IRIS 313-10485]	IRIS 313-10485	IRGC 127248	trop	0	A	CATIBOS::IRGC 3762-1::[IRIS 313-10485]	IRIS 313-10485	IRGC 127248	trop	1	C	T	T	-	-	-	C	C	C	T	C	-	-	-	-	C	-	G	C	T	T	-	A	-	G	G	C	T	T	C	G	T	G	G	G	G	G	-	-
MOROPOTOL::IRGC 3909-1::[IRIS 313-10489]	IRIS 313-10489	IRGC 127630	trop	0	A	MOROPOTOL::IRGC 3909-1::[IRIS 313-10489]	IRIS 313-10489	IRGC 127630	trop	0	C	T	T	-	-	-	C	C	C	T	C	-	-	-	-	C	-	G	C	T	T	-	A	-	G	G	C	T	T	C	G	T	G	G	G	G	G	-	-
TON ROO SHUN::IRGC 4572-1::[IRIS 313-10502]	IRIS 313-10502	IRGC 127865	ind1A	0	A	TON ROO SHUN::IRGC 4572-1::[IRIS 313-10502]	IRIS 313-10502	IRGC 127865	ind1A	8	C	T	T	-	-	-	C	C	C	T	C	-	-	-	-	A	A	G	C	T	T	-	A	-	G	G	C	T	T	C	G	T	G	G	G	G	G	-	-
HSIANG TSENF TAO::IRGC 5008-1::[IRIS 313-10507]	IRIS 313-10507	IRGC 128311	trop	0	A	HSIANG TSENF TAO::IRGC 5008-1::[IRIS 313-10507]	IRIS 313-10507	IRGC 128311	trop	1	C	T	T	-	-	-	C	C	C	T	C	-	-	-	-	C	-	G	C	T	T	-	A	-	G	G	C	T	T	C	G	T	G	G	G	G	G	-	-
AMBARIKORI::IRGC 5132-1::[IRIS 313-10509]	IRIS 313-10509	IRGC 127120	ind3	0	A	AMBARIKORI::IRGC 5132-1::[IRIS 313-10509]	IRIS 313-10509	IRGC 127120	ind3	18	C	T	T	-	-	-	C	C	C	T	C	-	-	-	-	A	A	G	C	T	T	-	A	-	G	G	C	T	T	C	G	T	G	G	G	G	G	-	-
MAGSIING::IRGC 5211-1::[IRIS 313-10510]	IRIS 313-10510	IRGC 127589	indx	0	A	MAGSIING::IRGC 5211-1::[IRIS 313-10510]	IRIS 313-10510	IRGC 127589	indx	15	C	T	T	-	-	-	C	C	C	T	C	-	-	-	-	C	-	G	C	T	T	-	A	-	G	G	C	T	T	C	G	T	G	G	G	G	G	-	-
ADT 22::IRGC 5901-1::[IRIS 313-10519]	IRIS 313-10519	IRGC 135733	ind2	0	A	ADT 22::IRGC 5901-1::[IRIS 313-10519]	IRIS 313-10519	IRGC 135733	ind2	18	C	T	T	-	-	-	C	C	C	T	C	-	-	-	-	A	A	G	C	T	T	-	A	-	G	G	C	T	T	C	G	T	G	G	G	G	G	-	-
NATURAL HYBRID C 33-8::IRGC 5929-1::[IRIS 313-10520]	IRIS 313-10520		indx	0	A	NATURAL HYBRID C 33-8::IRGC 5929-1::[IRIS 313-10520]	IRIS 313-10520		indx	5	C	T	T	-	-	-	C	C	C	T	C	-	-	-	-	C	-	G	C	T	T	-	A	-	G	G	C	T	T	C	G	T	G	G	G	G	T	T	-
SUKAMANDI 1005::IRGC 6065-1::[IRIS 313-10522]	IRIS 313-10522		admix	0	A	SUKAMANDI 1005::IRGC 6065-1::[IRIS 313-10522]	IRIS 313-10522		admix	17	C	T	T	-	-	-	C	C	C	T	C	-	-	-	-	C	-	G	C	T	T	-	A	-	G	G	C	T	T	C	G	T	G	G	G	G	G	-	-
CO 2::IRGC 6186-2::[IRIS 313-10526]	IRIS 313-10526		ind2	0	A	CO 2::IRGC 6186-2::[IRIS 313-10526]	IRIS 313-10526		ind2	18	C	T	T	-	-	-	C	C	C	T	C	-	-	-	-	A	A	G	C	T	T	-	A	-	G	G	C	T	T	C	G	T	G	G	G	G	G	-	-
ADT 12::IRGC 6254-1::[IRIS 313-10527]	IRIS 313-10527	IRGC 127107	ind2	0	A	ADT 12::IRGC 6254-1::[IRIS 313-10527]	IRIS 313-10527	IRGC 127107	ind2	17	C	T	T	-	-	-	C	C	C	T	C	-	-	-	-	C	-	G	C	T	T	-	A	-	G	G	C	T	T	C	G	T	G	G	G	G	G	-	-
D 204-1::IRGC 6445-1::[IRIS 313-10534]	IRIS 313-10534	IRGC 127290	aus	0	A	D 204-1::IRGC 6445-1::[IRIS 313-10534]	IRIS 313-10534	IRGC 127290	aus	14	C	T	T	-	-	-	C	C	C	T	C	-	-	-	-	C	-	G	C	T	T	-	A	-	G	G	C	T	T	C	G	T	G	G	G	G	T	T	-
KALAMON 113::IRGC 6534-1::[IRIS 313-10537]	IRIS 313-10537		admix	0	A	KALAMON 113::IRGC 6534-1::[IRIS 313-10537]	IRIS 313-10537		admix	6	C	T	T	-	-	-	C	C	C	T	C	-	-	-	-	C	-	G	C	T	T	-	A	-	G	G	C	T	T	C	G	T	G		G	G
IACA ESCURO::IRGC 6636-1::[IRIS 313-10541]	IRIS 313-10541	IRGC 131990	trop	0	A	IACA ESCURO::IRGC 6636-1::[IRIS 313-10541]	IRIS 313-10541	IRGC 131990	trop	1	C	T	T	-	-	-	C	C	C	T	C	-	-	-	-	C	-	G	C	T	T	-	A	-	G	G	C	T	T	C	G	T	G	G	G	G	G	-	-
DODGUI::IRGC 6666-1::[IRIS 313-10543]	IRIS 313-10543	IRGC 128281	aus	0	A	DODGUI::IRGC 6666-1::[IRIS 313-10543]	IRIS 313-10543	IRGC 128281	aus	4	C	T	T	-	-	-	C	C	C	T	C	-	-	-	-	C	-	G	C	T	T	-	A	-	G	G	C	T	T	C	G	T	G	G	G	G	G	-	-
DONGREM::IRGC 6688-1::[IRIS 313-10544]	IRIS 313-10544	IRGC 127340	ind2	0	A	DONGREM::IRGC 6688-1::[IRIS 313-10544]	IRIS 313-10544	IRGC 127340	ind2	10	C	T	T	-	-	-	C	C	C	T	C	-	-	-	-	C	-	G	C	T	T	-	A	-	G	G	C	T	T	C	G	T	G	G	G	G	G	-	-
RL GOPHER::IRGC 6934-2::[IRIS 313-10552]	IRIS 313-10552	IRGC 128150	trop	0	A	RL GOPHER::IRGC 6934-2::[IRIS 313-10552]	IRIS 313-10552	IRGC 128150	trop	14	C	T	T	-	-	-	C	C	C	T	C	-	-	-	-	A	A	G	C	T	T	-	A	-	G	G	C	T	T	C	G	T	G	G	G	G	G	-	-
LUA DEN MUA::IRGC 7185-1::[IRIS 313-10556]	IRIS 313-10556	IRGC 135770	ind3	0	A	LUA DEN MUA::IRGC 7185-1::[IRIS 313-10556]	IRIS 313-10556	IRGC 135770	ind3	17	C	T	T	-	-	-	C	C	C	T	C	-	-	-	-	C	-	G	C	T	T	-	A	-	G	G	C	T	T	C	G	T	G	G	G	G	G	-	-
LITCHIKIANG::IRGC 7287-1::[IRIS 313-10558]	IRIS 313-10558	IRGC 128367	temp	0	A	LITCHIKIANG::IRGC 7287-1::[IRIS 313-10558]	IRIS 313-10558	IRGC 128367	temp	0	C	T	T	-	-	-	C	C	C	T	C	-	-	-	-	C	-	G	C	T	T	-	A	-	G	G	C	T	T	C	G	T	G	G	G	G	G	-	-
FI LAI FENG::IRGC 7288-1::[IRIS 313-10559]	IRIS 313-10559	IRGC 127369	temp	0	A	FI LAI FENG::IRGC 7288-1::[IRIS 313-10559]	IRIS 313-10559	IRGC 127369	temp	0	C	T	T	-	-	-	C	C	C	T	C	-	-	-	-	C	-	G	C	T	T	-	A	-	G	G	C	T	T	C	G	T	G	G	G	G	G	-	-
TA PAI MAUNG::IRGC 7292-1::[IRIS 313-10560]	IRIS 313-10560	IRGC 127848	ind1A	0	A	TA PAI MAUNG::IRGC 7292-1::[IRIS 313-10560]	IRIS 313-10560	IRGC 127848	ind1A	4	C	T	T	-	-	-	C	C	C	T	C	-	-	-	-	C	-	G	C	T	T	-	A	-	G	G	C	T	T	C	G	T	G	G	G	G	G	-	-
NAN TEO 14::IRGC 7304-1::[IRIS 313-10561]	IRIS 313-10561	IRGC 127645	ind1A	0	A	NAN TEO 14::IRGC 7304-1::[IRIS 313-10561]	IRIS 313-10561	IRGC 127645	ind1A	12	C	T	T	-	-	-	C	C	C	T	C	-	-	-	-	C	-	G	C	T	T	-	A	-	G	G	C	T	T	C	G	T	G	G	G	G	G	-	-
SENG CHUI LIN::IRGC 7313-1::[IRIS 313-10562]	IRIS 313-10562	IRGC 128463	japx	0	A	SENG CHUI LIN::IRGC 7313-1::[IRIS 313-10562]	IRIS 313-10562	IRGC 128463	japx	16	C	T	T	-	-	-	C	C	C	T	C	-	-	-	-	C	-	G	C	T	T	-	A	-	G	G	C	T	T	C	G	T	G	G	G	G	G	-	-
[truncated: 1,147 more rows]
[truncated: 603 more columns]
