# Supplementary material for: Genome-wide association analysis uncovers novel rice blast resistance alleles
Source: Research Square preprint supplement (doi:10.21203/rs.3.rs-2580055/v1), 2023-03-02
Supplement: Supplementary file 3 [file d05a53eff1a0894b274ef928.xlsx]

## Sheet: snp3kvars-CHR12-10822534-108337
Mo15-23 infection score and GWAS association				Mo15-24 infection score and GWAS association			Mo15-125 infection score and GWAS association		IK81-25 infection score and GWAS association			M64-1-3-9-1 infection score and GWAS association			Functional Pita' ( C at position Chr 12 : 10607554 )	LOC_Os12g18729 Ptr				JAPONICA NIPPONBARE POSITIONS	10822544	10822545	10822546	1.08225e+07	1.08225e+07	1.08225e+07	10822548	10822549	10822550	10822551	10822575	1.08226e+07	1.08226e+07	1.08226e+07	1.08226e+07	10822667	1.08227e+07	10822734	10822735	10822736	10822753	1.08228e+07	10822784	1.08228e+07	10822930	10822931	10822932	10822933	10822971
																				JAPONICA NIPPONBARE ALLELES	C	T	T	-	-	-	C	C	C	T	C	-	-	-	-	C	-	G	C	T	T	-	A	-	G	G	C	T	T
	Binary infection scores of 0 are resistant while scores of 1 are susceptible																			MSU7 EFFECTS (cds-Non-synonymous/cds-Synonymous/Cds/3'UTR/5'UTR/Exon/splice Acceptor/splice Donor/Gene-intron/Promoter)	5_prime_UTR5_prime_UTR5_prime_UTR5_prime_UTR	5_prime_UTR5_prime_UTR5_prime_UTR5_prime_UTR	5_prime_UTR5_prime_UTR5_prime_UTR5_prime_UTR	5_prime_UTR5_prime_UTR5_prime_UTR5_prime_UTR	5_prime_UTR5_prime_UTR5_prime_UTR5_prime_UTR	5_prime_UTR5_prime_UTR5_prime_UTR5_prime_UTR	5_prime_UTR5_prime_UTR5_prime_UTR5_prime_UTR	5_prime_UTR5_prime_UTR5_prime_UTR5_prime_UTR	5_prime_UTR5_prime_UTR5_prime_UTR5_prime_UTR	5_prime_UTR5_prime_UTR5_prime_UTR5_prime_UTR	5_prime_UTR5_prime_UTR5_prime_UTR5_prime_UTR	5_prime_UTR5_prime_UTR5_prime_UTR5_prime_UTR	5_prime_UTR5_prime_UTR5_prime_UTR5_prime_UTR	5_prime_UTR5_prime_UTR5_prime_UTR5_prime_UTR	5_prime_UTR5_prime_UTR5_prime_UTR5_prime_UTR	5_prime_UTR5_prime_UTR5_prime_UTR5_prime_UTR	5_prime_UTR5_prime_UTR5_prime_UTR5_prime_UTR	5_prime_UTR5_prime_UTR5_prime_UTR5_prime_UTR	5_prime_UTR5_prime_UTR5_prime_UTR5_prime_UTR	5_prime_UTR5_prime_UTR5_prime_UTR5_prime_UTR	5_prime_UTR5_prime_UTR5_prime_UTR5_prime_UTR	5_prime_UTR5_prime_UTR5_prime_UTR5_prime_UTR	5_prime_UTR5_prime_UTR5_prime_UTR5_prime_UTR	5_prime_UTR5_prime_UTR5_prime_UTR5_prime_UTR	5_prime_UTR5_prime_UTR5_prime_UTR5_prime_UTR	5_prime_UTR5_prime_UTR5_prime_UTR5_prime_UTR	5_prime_UTR5_prime_UTR5_prime_UTR5_prime_UTR	5_prime_UTR5_prime_UTR5_prime_UTR5_prime_UTR	5_prime_UTR5_prime_UTR5_prime_UTRnonsynonymous_variant
																Known Katy Line	Katy Ptr Haplotype
																	GWAS Ptr Mo15-23 and/or 24
	GWAS Ptr Mo15-23 and/or 24 associated but non-resistant infection score (>3 / binary score 1).								GWAS Ptr IK81 and/or M64 associated but non-resistant infection score (>3 / binary score 1).								GWAS Ptr Mo15-23/24-like haplotype in all 3K rice genomes
	See highlighted associated SNP								See highlighted associated SNP							IK81, M64 or Mo15-125 assoc in Katy line or Mo15-23/24 gwas associated line	GWAS Ptr IK81 and M64
% of susceptible accessions carrying associated SNP	6.09756			% of susceptible accessions carrying associated SNP	4.5977		% of susceptible accessions (>3.1) carrying associated SNP	22.2222	% of susceptible accessions carrying associated SNP	2.04082		% of susceptible accessions carrying associated SNP	29.4872				GWAS Ptr IK81 and M64 -like haplotype in 3K rice genomes
		Resistance association T			Resistance association C			Resistance association A		Resistance association T			Resistance association A
ASSAY ID	Mo15-23 Binary infection score	Chr 12 : 10797768	Resistant with associated SNP (1)	Mo15-24 Binary infection score	Chr 12 : 10806802	Resistant with associated SNP (1)	Mo15.125 Gauss Score	Chr 12 : 10926845	Ik81-25 Binary infection Score	Chr 12 : 10830098	Resistant with associated SNP (1)	M64-1-3-9-1 Binary infection score	Chr 12 : 10926845	Resistant with associated SNP (1)	Chr 12 : 10607554		ASSAY ID	ACCESSION	SUBPOPULATION	Mismatchs to reference
IRIS_313-10648	0	T	1	0	C	1	0	A	0	C	NA	0	A	1	A	PREAH SIHANOUK::IRGC 11328-2::[IRIS 313-10648]	IRIS 313-10648	IRGC 132364	ind3	48	C	T	T	-	-	-	C	C	C	T	C	-	-	-	-	C	-	G	C	T	T	-	A	-	G	G	C	T	T
IRIS_313-12190	0	T	1	0	C	1	0	A	0	C	NA	0	A	1	A	CHAO KHAW NYAO::IRGC 89460-1::[IRIS 313-12190]	IRIS 313-12190	IRGC 131975	indx	60.5	C	T	T	-	-	-	C	C	C	T	C	-	-	-	-	A	A	G	C	T	T	-	A	-	G	G	C	T	T
IRIS_313-11809	0	T	1	0	C	1	0	G	0	C	NA	0	G	NA	A	MHARAKA::IRGC 70612-1::[IRIS 313-11809]	IRIS 313-11809	IRGC 128387	aus	153.5	C	T	C	C	C	C	C	C	C	T	T	T	A	G	A	A	A	G	C	T	C	C	C	C	G	G	C	T	C
IRIS_313-9121	0	C	NA	0	T	T/T	0	A	0	T	1	0	A	1	C	KHAO LEUANG RAI::IRGC 48168-1::[IRIS 313-9121]	IRIS 313-9121	IRGC 125802	ind2	29	C	T	T	-	-	-	C	C	C	T	C	-	-	-	-	A	A	G	C	T	T	-	A	-	G	G	C	T	T
IRIS_313-11924	0	NA	NA	0	T	T/T	0	A	0	C	NA	0	A	1	A	NAM JAM::IRGC 75069-1::[IRIS 313-11924]	IRIS 313-11924	IRGC 128400	subtrop	149.5	C	T	T	-	-	-	C	C	C	T	C	-	-	-	-	C	-	G	C	T	T	-
IRIS_313-10703	0	C	NA	0	T	T/T	0	G	0	C	NA	0	G	NA	A	PADI ADONG DUMARAT::IRGC 14356-1::[IRIS 313-10703]	IRIS 313-10703	IRGC 128418	trop	0	C	T	T	-	-	-	C	C	C	T	C	-	-	-	-	C	-	G	C	T	T	-	A	-	G	G	C	T	T
IRIS_313-11104	0	C	NA	0	T	T/T	0	G	0	C	NA	0	G	NA	A	D 3-102::IRGC 30972-1::[IRIS 313-11104]	IRIS 313-11104	IRGC 131978	trop	1	C	T	T	-	-	-	C	C	C	T	C	-	-	-	-	C	-	G	C	T	T	-	A	-	G	G	C	T	T
IRIS_313-11524	0	C	NA	0	T	T/T	0	G	0	C	NA	0	G	NA	A	KOUINONEPOU::IRGC 56663-1::[IRIS 313-11524]	IRIS 313-11524	IRGC 132405	trop	0	C	T	T	-	-	-	C	C	C	T	C	-	-	-	-	C	-	G	C	T	T	-	A	-	G	G	C	T	T
IRIS_313-11659	0	C	NA	0	T	T/T	0	G	0	C	NA	0	G	NA	A	TOBOHUN::IRGC 63433-1::[IRIS 313-11659]	IRIS 313-11659	IRGC 132047	trop	1	C	T	T	-	-	-	C	C	C	T	C	-	-	-	-	C	-	G	C	T	T	-	A	-	G	G	C	T	T
IRIS_313-11832	0	C	NA	0	T	T/T	0	G	0	C	NA	0	G	NA	A	AE WAWNG POO DOO::IRGC 71007-1::[IRIS 313-11832]	IRIS 313-11832	IRGC 131964	subtrop	17	C	T	T	-	-	-	C	C	C	T	C	-	-	-	-	A	A	G	C	T	T	-	A	-	G	G	C	T	T
IRIS_313-11915	0	C	NA	0	T	T/T	0	G	0	C	NA	0	G	NA	A	IB 95::IRGC 74677-1::[IRIS 313-11915]	IRIS 313-11915	IRGC 128316	trop	1	C	T	T	-	-	-	C	C	C	T	C	-	-	-	-	C	-	G	C	T	T	-	A	-	G	G	C	T	T
IRIS_313-7914	0	C	NA	0	T	T/T	0	G	0	C	NA	0	G	NA	A	IRAT 112::C1::[IRIS 313-7914]	IRIS 313-7914	IRGC 122115	trop	0	C	T	T	-	-	-	C	C	C	T	C	-	-	-	-	C	-	G	C	T	T	-	A	-	G	G	C	T	T
IRIS_313-8884	0	C	NA	0	T	T/T	0	G	0	C	NA	0	G	NA	A	E WAWNG::IRGC 71140-1::[IRIS 313-8884]	IRIS 313-8884	IRGC 126134	subtrop	10	C	T	T	-	-	-	C	C	C	T	C	-	-	-	-	A	A	G	C	T	T	-	A	-	G	G	C	T	T
IRIS_313-9791	NA	C	NA	0	T	T/T	0	A	0	T	1	0	A	1	C	LEAD::IRGC 5805-1::[IRIS 313-9791]	IRIS 313-9791	IRGC 125821	indx	22	C	T	T	-	-	-	C	C	C	T	C	-	-	-	-	C	-	G	C	T	T	-	A	-	G	G	C	T	T
IRIS_313-11096	NA	T	NA	0	C	1	0	A	0	C	NA	0	A	1	A	CADUNG SO BLOC 1::IRGC 30231-1::[IRIS 313-11096]	IRIS 313-11096	IRGC 135743	ind3	52	C	T	T	-	-	-	C	C	C	T	C	-	-	-	-	C	-	G	C	T	T	-	A	-	G	G	C	T	T
IRIS_313-9629	NA	T	NA	0	C	1	0	G	0		NA	0	G	NA	A	JC 157::[IRIS 313-9629]	IRIS 313-9629	IRGC 117498	aro	93	C	T	T	-	-	-	C	C	C	T	C	-	-	-	-	C	-				T	-			G	G	C	T	C
IRIS_313-10651	0	T	1	1	C	0	0	A	0	C	NA	0	A	1	A	PHOU SAO LEUM NYANG::IRGC 11570-2::[IRIS 313-10651]	IRIS 313-10651	IRGC 128134	indx	61.5	C	T	T	-	-	-	C	C	C	T	C	-	-	-	-	A	A	G	C	T	T	-	A	-	G	G	C	T	T
IRIS_313-11218	0	NA	NA	1	T	T/T	0	G	0	C	NA	0	G	NA	A	BADSHABHOG 4-60::IRGC 37793-2::[IRIS 313-11218]	IRIS 313-11218	IRGC 127982	aro	2	C	T	T	-	-	-	C	C	C	T	C	-	-	-	-	C	-	G	C	T	T	-	A	-	G	G	C	T	T
IRIS_313-10628	1	C	NA	1	T	T/T	0	A	0	T	1	0	A	1	C	O. SATIVA::IRGC 10164-2::[IRIS 313-10628]	IRIS 313-10628	IRGC 132361	ind2	29	C	T	T	-	-	-	C	C	C	T	C	-	-	-	-	A	A	G	C	T	T	-	A	-	G	G	C	T	T
IRIS_313-12273	1	C	NA	1	T	T/T	0	A	0	T	1	0	A	1	C	AIJIAONANTE::IRGC 96974-1::[IRIS 313-12273]	IRIS 313-12273	IRGC 127115	ind1A	14	C	T	T	-	-	-	C	C	C	T	C	-	-	-	-	A	A	G	C	T	T	-	A	-	G	G	C	T	T
IRIS_313-10656	0	C	NA	NA	T	NA	0	G	0	C	NA	0	G	NA	A	NOK KOD::IRGC 11784-1::[IRIS 313-10656]	IRIS 313-10656	IRGC 128407	subtrop	18	C	T	T	-	-	-	C	C	C	T	C	-	-	-	-	C	-	G	C	T	T	-	A	-	G	G	C	T	T
IRIS_313-7826	1	C	NA	NA	T	NA	0	A	0	T	1	0	A	1	C	WAS 33-B-B-15-1-4-5::C1::[IRIS 313-7826]	IRIS 313-7826	IRGC 122292	ind1B	19	C	T	T	-	-	-	C	C	C	T	C	-	-	-	-	C	-	G	C	T	T	-	A	-	G	G	C	T	T
IRIS_313-11035	0	C	NA	0	T	T/T	0.2	A	0	T	1	0	A	1	C	ZIRA SHAHI::IRGC 28327-1::[IRIS 313-11035]	IRIS 313-11035	IRGC 128513	admix	21	C	T	T	-	-	-	C	C	C	T	C	-	-	-	-	A	A	G	C	T	T	-	A	-	G	G	C	T	T
IRIS_313-11107	0	C	NA	0	T	T/T	0.2	G	0	C	NA	0	G	NA	A	ZANTON::IRGC 31248-1::[IRIS 313-11107]	IRIS 313-11107	IRGC 132055	trop	1	C	T	T	-	-	-	C	C	C	T						C	-	G	C	T	T	-	A	-	G	G	C	T	T
IRIS_313-11540	0	C	NA	0	T	T/T	0.2	G	0	C	NA	0	G	NA	A	PATIE ROUGE::IRGC 57686-1::[IRIS 313-11540]	IRIS 313-11540	IRGC 128428	trop	1	C	T	T	-	-	-	C	C	C	T	C	-	-	-	-	C	-	G	C	T	T	-	A	-	G	G	C	T	T
IRIS_313-8694	0	C	NA	0	T	T/T	0.2	G	0	C	NA	0	G	NA	A	TRES MESES::IRGC 6464-1::[IRIS 313-8694]	IRIS 313-8694	IRGC 126010	trop	0	C	T	T	-	-	-	C	C	C	T	C	-	-	-	-	C	-	G	C	T	T	-	A	-	G	G	C	T	T
IRIS_313-10171	0	C/T	NA	0	T/C	T/C	0.2	G/A	0	T	1	0	G/A	NA	A/C	YA NONG ZAO 4::IRGC 63908-1::[IRIS 313-10171]	IRIS 313-10171	IRGC 125944	ind1A	57.5	C	T	T	-	-	-	C	C	C	T	C	-	-	-	-	A	A	G	C	T	T	-	A	-	G	G	C	T	T/C
IRIS_313-11159	NA	C	NA	1	T	T/T	0.2	G	0	C	NA	0	G	NA	A	HYB 5-2-1-1-4::IRGC 34283-2::[IRIS 313-11159]	IRIS 313-11159	IRGC 132251	trop	0	C	T	T	-	-	-	C	C	C	T	C	-	-	-	-	C	-	G	C	T	T	-	A	-	G	G	C	T	T
IRIS_313-10056	0	C	NA	NA	T	NA	0.2	G	0	C	NA	0	G	NA	A	HOKURIKU 52::IRGC 72491-1::[IRIS 313-10056]	IRIS 313-10056	IRGC 125763	subtrop	1	C	T	T	-	-	-	C	C	C	T	C	-	-	-	-	C	-	G	C	T	T	-	A	-	G	G	C	T	T
IRIS_313-11075	0	C	NA	0	T	T/T	0.222222	G	0	C	NA	0	G	NA	A	KHAO NAM YEN::IRGC 29546-2::[IRIS 313-11075]	IRIS 313-11075	IRGC 128084	japx	19	C	T	T	-	-	-	C	C	C	T	C	-	-	-	-	A	A	G	C	T	T	-	A	-	G	G	C	T	T
IRIS_313-11713	0	C	NA	1	T	T/T	0.3	A	0	T	1	0	A	1	C	ITA 245::IRGC 66288-1::[IRIS 313-11713]	IRIS 313-11713	IRGC 127445	ind3	10	C	T	T	-	-	-	C	C	C	T	C	-	-	-	-	A	A	G	C	T	T	-	A	-	G	G	C	T	T
IRIS_313-12319	0	NA	NA	0	T	T/T	0.4	A	0	T	1	0	A	1	C	PSBRC 18::IRGC 99639-1::[IRIS 313-12319]	IRIS 313-12319	IRGC 127743	ind1B	19	C	T	T	-	-	-	C	C	C	T	C	-	-	-	-	C	-	G	C	T	T	-	A	-	G	G	C	T	T
IRIS_313-10059	0	C	NA	NA	T	NA	0.4	A	0	T	1	0	A	1	C	DACHEONGBYEO::IRGC 72533-1::[IRIS 313-10059]	IRIS 313-10059	IRGC 125717	temp	21	C	T	T	-	-	-	C	C	C	T	C	-	-	-	-	A	A	G	C	T	T	-	A	-	G	G	C	T	T
IRIS_313-10352	0	NA	NA	0	T	T/T	0.5	A	0	T	1	0	A	1	C	CT 9737-6-1-1-2-2P-M::IRGC 117330-1::[IRIS 313-10352]	IRIS 313-10352	IRGC 120922	indx	36	C	T	T	-	-	-	C	C	C	T	C	-	-	-	-	A	A	G	C	T	T	-	A	-	G	G	C	T	T
IRIS_313-11436	0	C	NA	0	T	T/T	0.6	G	0	C	NA	0	G	NA	A	SAKAZELE (538)::IRGC 50880-1::[IRIS 313-11436]	IRIS 313-11436	IRGC 127779	trop	21	C	T	T	-	-	-	C	C	C	T	C	-	-	-	-	A	A	G	C	T	T	-	A	-	G	G	C	T	T
IRIS_313-12018	0	C	NA	0	T	T/T	0.6	G	0	C	NA	0	G	NA	A	FRENSI GBOI::IRGC 79983-1::[IRIS 313-12018]	IRIS 313-12018	IRGC 128293	trop	1	C	T	T	-	-	-	C	C	C	T	C	-	-	-	-	C	-	G	C	T	T	-	A	-	G	G	C	T	T
IRIS_313-7922	0	C	NA	0	T	T/T	0.625	G	0	C	NA	0	G	NA	A	IRAT 234::C1::[IRIS 313-7922]	IRIS 313-7922	IRGC 122119	trop	0	C	T	T	-	-	-	C	C	C	T	C	-	-	-	-	C	-	G	C	T	T	-	A	-	G	G	C	T	T
IRIS_313-11720	NA	C	NA	1	T	T/T	0.7	A	0	T	1	0	A	1	C	DAW 85::IRGC 66704-1::[IRIS 313-11720]	IRIS 313-11720	IRGC 127302	ind3	29	C	T	T	-	-	-	C	C	C	T	C	-	-	-	-	A	A	G	C	T	T	-	A	-	G	G	C	T	T
IRIS_313-11799	1	NA	NA	1	T	T/T	0.8	A	0	T	1	0	A	1	C	E ZI 110::IRGC 70201-1::[IRIS 313-11799]	IRIS 313-11799	IRGC 127366	ind1A	37	C	T	T	-	-	-	C	C	C	T	C	-	-	-	-	A	A	G	C	T	T	-	A	-	G	G	C	T	T
IRIS_313-8316	NA	C	NA	1	T	T/T	0.9	A	0	T	1	0	A	1	C	RADIN PAHANG::IRGC 14487-1::[IRIS 313-8316]	IRIS 313-8316	IRGC 131948	ind3	21	C	T	T	-	-	-	C	C	C	T	C	-	-	-	-	A	A	G	C	T	T	-	A	-	G	G	C	T	T
IRIS_313-11236	NA	NA	NA	NA	T	NA	0.9	G	0	C	NA	0	G	NA	A	LIONG ORN::IRGC 38875-2::[IRIS 313-11236]	IRIS 313-11236	IRGC 128523	ind3	13	C	T	T	-	-	-	C	C	C	T	C	-	-	-	-	A	A	G	C	T	T	-	A	-	G	G	C	T	T
IRIS_313-8390	0	T	1	0	C	1	1	G	0	C	NA	0	G	NA	A	SUFAID 246::IRGC 28303-1::[IRIS 313-8390]	IRIS 313-8390	IRGC 121128	aus	75	C	T	T	-	-	-	C	C	C	T	C	-	-	-	-	C	-	G	C	T	T	-			G	G	C	T	C
IRIS_313-8571	0	T	1	0	C	1	1	G	0	C	NA	0	G	NA	A	ES 21::IRGC 56171-1::[IRIS 313-8571]	IRIS 313-8571	IRGC 126204	ind3	104	C	T	T	-	-	-	C	C	C	T	C	-	-	-	-	C	-	G	C	T	T	-	A	-	G	G	C	T	C
IRIS_313-10054	0	NA	NA	0	T	T/T	1	A	0	T	1	0	A	1	C	TOC 5430::IRGC 70487-1::[IRIS 313-10054]	IRIS 313-10054	IRGC 125924	indx	14	C	T	T	-	-	-	C	C	C	T	C	-	-	-	-	A	A	G	C	T	T	-	A	-	G	G	C	T	T
IRIS_313-10301	0	NA	NA	0	T	T/T	1	A	0	T	1	0	A	1	C	IRGA 959-1-2-2F-4-1-4A-6-CA-6X::IRGC 117006-1::[IRIS 313-10301]	IRIS 313-10301	IRGC 126064	indx	28	C	T	T	-	-	-	C	C	C	T	C	-	-	-	-	A	A	G	C	T	T	-	A	-	G	G	C	T	T
IRIS_313-10880	0	C	NA	0	T	T/T	1	A	0	T	1	0	A	1	C	ARC 12180::IRGC 21965-2::[IRIS 313-10880]	IRIS 313-10880	IRGC 127940	ind2	19	C	T	T	-	-	-	C	C	C	T	C	-	-	-	-	A	A	G	C	T	T	-	A	-	G	G	C	T	T
IRIS_313-12258	0	NA	NA	0	NA	NA	1	A	0	C	NA	0	A	1	A	DON::IRGC 95117-1::[IRIS 313-12258]	IRIS 313-12258	IRGC 128283	subtrop	114.5																		G	C	T			A	-
IRIS_313-10580	0	C	NA	0	T	T/T	1	G	0	C	NA	0	G	NA	A	PARAY KINARABAW::IRGC 8083-1::[IRIS 313-10580]	IRIS 313-10580	IRGC 127718	trop	0	C	T	T	-	-	-	C	C	C	T	C	-	-	-	-	C	-	G	C	T	T	-	A	-	G	G	C	T	T
IRIS_313-11428	0	C	NA	0	T	T/T	1	G	0	C	NA	0	G	NA	A	MARANHAO BRANCO::IRGC 50503-1::[IRIS 313-11428]	IRIS 313-11428	IRGC 128382	trop	0	C	T	T	-	-	-	C	C	C	T	C	-	-	-	-	C	-	G	C	T	T	-	A	-	G	G	C	T	T
IRIS_313-11739	0	C	NA	0	T	T/T	1	G	0	C	NA	0	G	NA	A	NAKPUI::IRGC 67594-1::[IRIS 313-11739]	IRIS 313-11739	IRGC 128398	trop	18	C	T	T	-	-	-	C	C	C	T	C	-	-	-	-	A	A	G	C	T	T	-	A	-	G	G	C	T	T
IRIS_313-7863	0	C	NA	0	T	T/T	1	G	0	C	NA	0	G	NA	A	CIRAD 403::GERVEX 9039-C1::[IRIS 313-7863]	IRIS 313-7863	IRGC 122014	trop	0	C	T	T	-	-	-	C	C	C	T	C	-	-	-	-	C	-	G	C	T	T	-	A	-	G	G	C	T	T
IRIS_313-10400	0	NA	NA	0	T	T/T	1	G/A	0	T	1	0	G/A	NA	C	IRGA 370-38-1-1F-C4-2::IRGC 117342-1::[IRIS 313-10400]	IRIS 313-10400	IRGC 125988	ind1B	15	C	T	T	-	-	-	C	C	C	T	C	-	-	-	-	A	A	G	C	T	T	-	A	-	G	G	C	T	T
IRIS_313-11779	1	NA	NA	0	T	T/T	1	A	0	T	1	0	A	1	C	KATUMANI::IRGC 69695-1::[IRIS 313-11779]	IRIS 313-11779	IRGC 127500	ind3	17	C	T	T	-	-	-	C	C	C	T	C	-	-	-	-	A	A	G	C	T	T	-	A	-	G	G	C	T	T
IRIS_313-10879	1	C/T	NA	0	T	T/T	1	A	0	T	1	0	A	1	C	ARC 12124::IRGC 21929-1::[IRIS 313-10879]	IRIS 313-10879	IRGC 127145	admix	21	C	T	T	-	-	-	C	C	C	T	C	-	-	-	-	A	A	G	C	T	T	-	A	-	G	G	C	T	T
IRIS_313-11807	1	C	NA	0	T	T/T	1	A	0	T	1	0	A	1	C	R 582::IRGC 70504-1::[IRIS 313-11807]	IRIS 313-11807	IRGC 127757	indx	29	C	T	T	-	-	-	C	C	C	T	C	-	-	-	-	A	A	G	C	T	T	-	A	-	G	G	C	T	T
IRIS_313-11243	NA	C	NA	0	T	T/T	1	G	0	C	NA	0	G	NA	A	RATNAGIRI 45-2::IRGC 39709-1::[IRIS 313-11243]	IRIS 313-11243	IRGC 127765	admix	9.5	C	T	T	-	-	-	C	C	C	T	C	-	-	-	-	C	-	G	C	T	T	-	A	-	G	G	C	T	T
IRIS_313-12299	NA	C	NA	0	T	T/T	1	G	0	C	NA	0	G	NA	A	MUANG TAY::IRGC 98382-1::[IRIS 313-12299]	IRIS 313-12299	IRGC 136100	subtrop	1	C	T	T	-	-	-	C	C	C	T	C	-	-	-	-	C	-	G	C	T	T	-	A	-	G	G	C	T	T
IRIS_313-12345	NA	C	NA	0	T	T/T	1	G	0	C	NA	0	G	NA	A	VIENG::IRGC 107375-2::[IRIS 313-12345]	IRIS 313-12345	IRGC 128201	subtrop	0	C	T	T	-	-	-	C	C	C	T	C	-	-	-	-	C	-	G	C	T	T	-	A	-	G	G	C	T	T
IRIS_313-11895	0	C	NA	1	T	T/T	1	A	0	T	1	0	A	1	C	BA TUC RAN::IRGC 73239-1::[IRIS 313-11895]	IRIS 313-11895	IRGC 132391	ind3	21	C	T	T	-	-	-	C	C	C	T	C	-	-	-	-	A	A	G	C	T	T	-	A	-	G	G	C	T	T
IRIS_313-12269	0	C	NA	1	T	T/T	1	A	0	T	1	0	A	1	C	SHWEWARHNAN::IRGC 96053-1::[IRIS 313-12269]	IRIS 313-12269	IRGC 127802	indx	18	C	T	T	-	-	-	C	C	C	T	C	-	-	-	-	C	-	G	C	T	T	-	A	-	G	G	C	T	T
IRIS_313-8846	0	C	NA	1	T	T/T	1	A	0	T	1	0	A	1	C	BAIANG 6::IRGC 6129-1::[IRIS 313-8846]	IRIS 313-8846	IRGC 125668	indx	26	C	T	T	-	-	-	C	C	C	T	C	-	-	-	-	C	-	G	C	T	T	-	A	-	G	G	C	T	T
IRIS_313-12311	0	NA	NA	NA	NA	NA	1	A	0		NA	0	A	1	A	TAM::IRGC 99161-1::[IRIS 313-12311]	IRIS 313-12311	IRGC 128481	subtrop	38
IRIS_313-10710	0	C	NA	NA	T	NA	1	G	0	C	NA	0	G	NA	A	PINDE GOGO WIERIE::IRGC 14795-2::[IRIS 313-10710]	IRIS 313-10710	IRGC 128135	trop	1	C	T	T	-	-	-	C	C	C	T	C	-	-	-	-	C	-	G	C	T	T	-	A	-	G	G	C	T	T
IRIS_313-10848	0	C	NA	NA	T	NA	1	G	0	C	NA	0	G	NA	A	ARC 6188::IRGC 20370-1::[IRIS 313-10848]	IRIS 313-10848	IRGC 131968	subtrop	1	C	T	T	-	-	-	C	C	C	T	C	-	-	-	-	C	-	G	C	T	T	-	A	-	G	G	C	T	T
IRIS_313-11808	0	C	NA	0	T	T/T	1.1	A	0	T	1	0	A	1	C	R 762::IRGC 70531-1::[IRIS 313-11808]	IRIS 313-11808	IRGC 128444	indx	12	C	T	T	-	-	-	C	C	C	T	C	-	-	-	-	A	A	G	C	T	T	-	A	-	G	G	C	T	T
IRIS_313-8876	0	C	NA	0	T	T/T	1.1	G	0	C	NA	0	G	NA	A	DELITUS::IRGC 5769-1::[IRIS 313-8876]	IRIS 313-8876	IRGC 125725	trop	12	C	T	T	-	-	-	C	C	C	T	C	-	-	-	-	C	-	G	C	T	T	-	A	-	G	G	C	T	T
IRIS_313-11814	1	C/T	NA	0	T	T/T	1.2	A	0	T	1	0	A	1	C	KIKUBA::IRGC 70722-1::[IRIS 313-11814]	IRIS 313-11814	IRGC 127523	ind3	29	C	T	T	-	-	-	C	C	C	T	C	-	-	-	-	A	A	G	C	T	T	-	A	-	G	G	C	T	T
IRIS_313-10673	NA	NA	NA	0	T	T/T	1.2	G	0	C	NA	0	G	NA	A	ARC 10843::IRGC 12653-1::[IRIS 313-10673]	IRIS 313-10673	IRGC 127130	aus	5	C	T	T	-	-	-	C	C	C	T	C	-	-	-	-	C	-	G	C	T	T	-	A	-	G	G	C	T	T
IRIS_313-9887	NA	C	NA	NA	T	NA	1.2	G	0	C	NA	0	G	NA	A	JEUK DO::IRGC 19775-1::[IRIS 313-9887]	IRIS 313-9887	IRGC 125784	temp	1	C	T	T	-	-	-	C	C	C	T	C	-	-	-	-	C	-	G	C	T	T	-	A	-	G	G	C	T	T
IRIS_313-11094	0	C	NA	0	T	T/T	1.3	G	0	C	NA	0	G	NA	A	MAK BOUAP::IRGC 30106-3::[IRIS 313-11094]	IRIS 313-11094	IRGC 132274	subtrop	1	C	T	T	-	-	-	C	C	C	T	C	-	-	-	-	C	-	G	C	T	T	-	A	-	G	G	C	T	T
IRIS_313-11538	0	T	1	0	C	1	1.5	G	0		NA	0	G	NA	A	J 6 IR 520 (WC 693)::IRGC 57600-1::[IRIS 313-11538]	IRIS 313-11538	IRGC 127447	ind1B	80	C	T	T	-	-	-	C	C	C	T	C	-	-	-	-	A	A	G	C	T	T	-			G	G	C	T	C
IRIS_313-10238	0	C	NA	0	T	T/T	1.6	A	0	T	1	0	A	1	C	PSBRC 88::IRGC 99717-1::[IRIS 313-10238]	IRIS 313-10238	IRGC 125876	ind1B	20	C	T	T	-	-	-	C	C	C	T	C	-	-	-	-	C	-	G	C	T	T	-	A	-	G	G	C	T	T
IRIS_313-10980	NA	NA	NA	0	T	T/T	1.6	A	0	T	1	0	A	1	C	DUDHSAR::IRGC 26458-1::[IRIS 313-10980]	IRIS 313-10980	IRGC 127344	admix	27	C	T	T	-	-	-	C	C	C	T	C	-	-	-	-	A	A	G	C	T	T	-	A	-	G	G	C	T	T
IRIS_313-12029	0	C	NA	1	T	T/T	1.6	G	0	C	NA	0	G	NA	A	CHAO MEO::IRGC 80273-1::[IRIS 313-12029]	IRIS 313-12029	IRGC 132278	subtrop	23	C	T	T	-	-	-	C	C	C	T	C	-	-	-	-	A	A	G	C	T	T	-	A	-	G	G	C	T	T
IRIS_313-10722	0	C	NA	1	T	T/T	1.75	G	0	C	NA	0	G	NA	A	GODAWEL::IRGC 15750-1::[IRIS 313-10722]	IRIS 313-10722	IRGC 128301	trop	1	C	T	T	-	-	-	C	C	C	T	C	-	-	-	-	C	-	G	C	T	T	-	A	-	G	G	C	T	T
IRIS_313-12024	0	C	NA	0	T	T/T	1.8	A	0	T	1	0	A	1	C	TOS 9795::IRGC 80142-1::[IRIS 313-12024]	IRIS 313-12024	IRGC 127866	ind1B	23	C	T	T	-	-	-	C	C	C	T	C	-	-	-	-	A	A	G	C	T	T	-	A	-	G	G	C	T	T
IRIS_313-11743	0	T	1	0	C	1	2	G	0	C	NA	0	G	NA	A	CHHOTI MASHINO::IRGC 67830-1::[IRIS 313-11743]	IRIS 313-11743	IRGC 127272	aro	72	C	T	T	-	-	-	C	C	C	T	C	-	-	-	-	C	-	G	C	T	T	-	A	-	G	G	C	T	C
IRIS_313-11785	0	T	1	0	C	1	2	G	0	C	NA	0	G	NA	A	MOSHI::IRGC 69737-1::[IRIS 313-11785]	IRIS 313-11785	IRGC 127631	ind3	63											C	-	-	-	-	C	-								G	G	C	T	C
IRIS_313-10886	0	C	NA	0	T	T/T	2	G	0	C	NA	0	G	NA	A	ARC 12655::IRGC 22226-2::[IRIS 313-10886]	IRIS 313-10886	IRGC 132240	subtrop	19	C	T	T	-	-	-	C	C	C	T	C	-	-	-	-	A	A	G	C	T	T	-	A	-	G	G	C	T	T
IRIS_313-11127	0	C	NA	0	T	T/T	2	G	0	C	NA	0	G	NA	A	BUBAW::IRGC 32989-2::[IRIS 313-11127]	IRIS 313-11127	IRGC 132307	subtrop	16	C	T	T	-	-	-	C	C	C	T	C	-	-	-	-	C	-	G	C	T	T	-	A	-	G	G	C	T	T
IRIS_313-11426	0	C	NA	0	T	T/T	2	G	0	C	NA	0	G	NA	A	CHATAO::IRGC 50456-1::[IRIS 313-11426]	IRIS 313-11426	IRGC 128260	trop	0	C	T	T	-	-	-	C	C	C	T	C	-	-	-	-	C	-	G	C	T	T	-	A	-	G	G	C	T	T
IRIS_313-8778	0	C	NA	0	T	T/T	2	G	0	C	NA	0	G	NA	A	SUP BLUE ROSE::IRGC 1739-1::[IRIS 313-8778]	IRIS 313-8778	IRGC 126124	trop	1	C	T	T	-	-	-	C	C	C	T	C	-	-	-	-			G	C	T	T	-	A	-	G	G	C	T	T
IRIS_313-9851	0	C	NA	0	T	T/T	2	G	0	C	NA	0	G	NA	A	GOGOWIERIE::IRGC 14791-1::[IRIS 313-9851]	IRIS 313-9851	IRGC 126977	trop	1	C	T	T	-	-	-	C	C	C	T	C	-	-	-	-	C	-	G	C	T	T	-	A	-	G	G	C	T	T
IRIS_313-11784	1	C	NA	0	T	T/T	2	A	0	T	1	0	A	1	C	MBEIMBEIHUN::IRGC 69730-1::[IRIS 313-11784]	IRIS 313-11784	IRGC 127619	ind1B	29	C	T	T	-	-	-	C	C	C	T	C	-	-	-	-	A	A	G	C	T	T	-	A	-	G	G	C	T	T
IRIS_313-11273	NA	C	NA	0	T	T/T	2	A	0	T	1	0	A	1	C	ARC 14860::IRGC 41793-2::[IRIS 313-11273]	IRIS 313-11273	IRGC 127962	indx	37	C	T	T	-	-	-	C	C	C	T	C	-	-	-	-	A	A	G	C	T	T	-	A	-	G	G	C	T	T
IRIS_313-10806	0	C	NA	1	T	T/T	2	A	0	T	1	0	A	1	C	RADEN DJAWA (GUNDIL)::IRGC 18558-1::[IRIS 313-10806]	IRIS 313-10806	IRGC 135789	ind3	23	C	T	T	-	-	-	C	C	C	T	C	-	-	-	-	A	A	G	C	T	T	-	A	-	G	G	C	T	T
IRIS_313-11838	1	NA	NA	1	T	T/T	2	A	0	T	1	0	A	1	C	LEUM DERN::IRGC 71288-1::[IRIS 313-11838]	IRIS 313-11838	IRGC 132389	ind3	10	C	T	T	-	-	-	C	C	C	T	C	-	-	-	-	A	A	G	C	T	T	-	A	-	G	G	C	T	T
IRIS_313-11783	1	C	NA	1	T	T/T	2	A	0	T	1	0	A	1	C	MAMA TABALI::IRGC 69720-1::[IRIS 313-11783]	IRIS 313-11783	IRGC 132015	indx	21	C	T	T	-	-	-	C	C	C	T	C	-	-	-	-	A	A	G	C	T	T	-	A	-	G	G	C	T	T
IRIS_313-11281	NA	C	NA	1	T	T/T	2	A	0	T	1	0	A	1	C	ARC 15505::IRGC 42066-1::[IRIS 313-11281]	IRIS 313-11281	IRGC 131967	ind1A	21	C	T	T	-	-	-	C	C	C	T	C	-	-	-	-	A	A	G	C	T	T	-	A	-	G	G	C	T	T
IRIS_313-10062	0	C	NA	NA	T	NA	2	G	0	C	NA	0	G	NA	A	REA::IRGC 73031-1::[IRIS 313-10062]	IRIS 313-10062	IRGC 126141	trop	15	C	T	T	-	-	-	C	C	C	T	C	-	-	-	-	A	A	G	C	T	T	-	A	-	G	G	C	T	T
IRIS_313-11360	0	C	NA	NA	T	NA	2	G	0	C	NA	0	G	NA	A	JALADHI 1::IRGC 45858-2::[IRIS 313-11360]	IRIS 313-11360	IRGC 132342	aro	8	C	T	T	-	-	-	C	C	C	T	C	-	-	-	-	C	-	G	C	T	T	-	A	-	G	G	C	T	T
IRIS_313-9072	1	C	NA	NA	T	NA	2	A	0	T	1	0	A	1	C	MUTA GANJE::IRGC 26744-1::[IRIS 313-9072]	IRIS 313-9072	IRGC 125847	ind2	13	C	T	T	-	-	-	C	C	C	T	C	-	-	-	-	C	-	G	C	T	T	-	A	-	G	G	C	T	T
IRIS_313-9139	1	C	NA	1	T	T/T	2.1	A	0	T	1	0	A	1	C	GOJOL GORIA::IRGC 26629-1::[IRIS 313-9139]	IRIS 313-9139	IRGC 125754	ind2	17	C	T	T	-	-	-	C	C	C	T	C	-	-	-	-	A	A	G	C	T	T	-	A	-	G	G	C	T	T
IRIS_313-10096	0	C	NA	NA	T	NA	2.1	G	0	C	NA	0	G	NA	A	JOKJEBICHAL::IRGC 77663-1::[IRIS 313-10096]	IRIS 313-10096	IRGC 125787	japx	1	C	T	T	-	-	-	C	C	C	T	C	-	-	-	-	C	-	G	C	T	T	-	A	-	G	G	C	T	T
IRIS_313-7819	1	C	NA	NA	T	NA	2.1	G	0	C	NA	0	G	NA	A	WAS 203-B-B-2-4-1::C1::[IRIS 313-7819]	IRIS 313-7819	IRGC 122289	ind1B	8	C	T	T	-	-	-	C	C	C	T	C	-	-	-	-	C	-	G	C	T	T	-	A	-	G	G	C	T	T
IRIS_313-11595	0	T	1	0	C	1	2.6	NA	0		NA	0	NA	NA	A	AMAKOYALI::IRGC 60878-1::[IRIS 313-11595]	IRIS 313-11595	IRGC 128213	aus	43	C	T	T	-	-	-	C	C	C	T	C	-	-	-	-	C	-	G	C	T	T	-			G	G	C	T
IRIS_313-10769	1	C	NA	1	T	T/T	2.6	A	0	T	1	0	A	1		GAJA BARU::IRGC 17586-1::[IRIS 313-10769]	IRIS 313-10769	IRGC 127375	indx	22	C	T	T	-	-	-	C	C	C	T	C	-	-	-	-	A	A	G	C	T	T	-	A	-	G	G	C	T	T
IRIS_313-11434	0	C	NA	0	T	T/T	2.7	G	0	C	NA	0	G	NA	A	FORTUNA BLANCO (SAN MARCOS)::IRGC 50764-1::[IRIS 313-11434]	IRIS 313-11434	IRGC 127370	trop	1	C	T	T	-	-	-	C	C	C	T	C	-	-	-	-	C	-	G	C	T	T	-	A	-	G	G	C	T	T
IRIS_313-10046	1	NA	NA	0	T	T/T	3	G	0	C	NA	0	G	NA	A	CHAMA (DWARF)::IRGC 69487-1::[IRIS 313-10046]	IRIS 313-10046	IRGC 125958	ind1B	11	C	T	T	-	-	-	C	C	C	T	C	-	-	-	-	C	-	G	C	T	T	-	A	-	G	G	C	T	T
IRIS_313-11149	1	C	NA	1	T	T/T	3	A	0	T	1	0	A	1	C	YODAYA::IRGC 33901-2::[IRIS 313-11149]	IRIS 313-11149	IRGC 128204	ind3	21	C	T	T	-	-	-	C	C	C	T	C	-	-	-	-	C	-	G	C	T	T	-	A	-	G	G	C	T	T
IRIS_313-12016	1	C	NA	1	T	T/T	3	A	0	T	1	0	A	1	C	EX AUBERGE::IRGC 79898-1::[IRIS 313-12016]	IRIS 313-12016	IRGC 135751	indx	15	C	T	T	-	-	-	C	C	C	T	C	-	-	-	-	A	A	G	C	T	T	-	A	-	G	G	C	T	T
IRIS_313-9818	1	T	0	NA	T/C	NA	3	NA	0	C/T	NA	0	NA	NA		C 1 6-5-2::IRGC 10669-1::[IRIS 313-9818]	IRIS 313-9818	IRGC 126147	admix	41.5	C	T					C	C	C	T	C	-	-	-	-	A	A	G	C	T	T	-	A	-	G	G	C	T
IRIS_313-8814	0	T	1	0	C	1	3.1	G	0		NA	0	G	NA	A	SHANKA::IRGC 67848-1::[IRIS 313-8814]	IRIS 313-8814	IRGC 121499	aro	59	C	T	T	-	-	-	C	C	C	T	C	-	-	-	-	C	-	G	C	T			A	-	G	G	C	T	C
IRIS_313-11050	NA	T	NA	0	C	1	3.1	G	0	C	NA	0	G	NA	A	AUS 233::IRGC 29036-1::[IRIS 313-11050]	IRIS 313-11050	IRGC 127180	aus	117.5	C	T	T	-	-	-	C	C	C	T	C	-	-	-	-	C	-	G	C	T	T	-	A	-	G	G	C	T	C
IRIS_313-11702	0	C	NA	1	T	T/T	3.1	G	0	C	NA	0	G	NA	A	CN 1067::IRGC 65680-1::[IRIS 313-11702]	IRIS 313-11702	IRGC 127285	temp	0	C	T	T	-	-	-	C	C	C	T	C	-	-	-	-	C	-	G	C	T	T	-	A	-	G	G	C	T	T
IRIS_313-10002	NA	C	NA	1	T	T/T	3.1	A	0	T	1	0	A	1	C	BW 295-5::IRGC 63098-1::[IRIS 313-10002]	IRIS 313-10002	IRGC 125955	ind1B	0	C	T	T	-	-	-	C	C	C	T	C	-	-	-	-	C	-	G	C	T	T	-	A	-	G	G	C	T	T
IRIS_313-11611	NA	C	NA	1	T	T/T	3.1	G	0	C	NA	0	G	NA	A	YAH YAW::IRGC 61359-1::[IRIS 313-11611]	IRIS 313-11611	IRGC 127898	trop	1	C	T	T	-	-	-	C	C	C	T	C	-	-	-	-	C	-	G	C	T	T	-	A	-	G	G	C	T	T
IRIS_313-11351	1	C	NA	1	T	T/T	3.125	A	0	T	1	0	A	1	C	BANCHI::IRGC 45055-2::[IRIS 313-11351]	IRIS 313-11351	IRGC 127986	ind2	27	C	T	T	-	-	-	C	C	C	T	C	-	-	-	-	A	A	G	C	T	T	-	A	-	G	G	C	T	T
IRIS_313-10453	0	C	NA	1	T	T/T	3.2	G	0	C	NA	0	G	NA	A	LU TAO 2::IRGC 1175-1::[IRIS 313-10453]	IRIS 313-10453	IRGC 128371	japx	1	C	T	T	-	-	-	C	C	C	T	C	-	-	-	-	C	-	G	C	T	T	-	A	-	G	G	C	T	T
IRIS_313-9582	1	C	NA	1	T	T/T	3.2	A	0	T	1	0	A	1	C	SADOK::IRGC 13334-1::[IRIS 313-9582]	IRIS 313-9582	IRGC 131917	ind3	13	C	T	T	-	-	-	C	C	C	T	C	-	-	-	-	A	A	G	C	T	T	-	A	-	G	G	C	T	T
IRIS_313-10375	1	NA	NA	NA	T	NA	3.2	A	0		NA	0	A	1	C	IR 70027-8-2-2-3-2::IRGC 117382-1::[IRIS 313-10375]	IRIS 313-10375	IRGC 126028	indx	11	C	T	T	-	-	-	C	C	C	T	C	-	-	-	-	C	-	G	C	T	T	-			G	G	C	T	T
IRIS_313-10657	0	C	NA	0	T	T/T	3.3	G	0	C	NA	0	G	NA	A	THANGONE::IRGC 11816-1::[IRIS 313-10657]	IRIS 313-10657	IRGC 135801	subtrop	1	C	T	T	-	-	-	C	C	C	T	C	-	-	-	-	C	-	G	C	T	T	-	A	-	G	G	C	T	T
IRIS_313-8031	1	C	NA	1	T	T/T	3.66667	G	0	C	NA	0	G	NA	A	RUBINO::GERVEX 80-C1::[IRIS 313-8031]	IRIS 313-8031	IRGC 122230	japx	0	C	T	T	-	-	-	C	C	C	T	C	-	-	-	-	C	-	G	C	T	T	-	A	-	G	G	C	T	T
IRIS_313-8813	0	T	1	0	C	1	4	G	0	C	NA	0	G	NA	A	ARC 10497::[IRIS 313-8813]	IRIS 313-8813	IRGC 117425	aro	110	C	T	T	-	-	-	C	C	C	T	C	-	-	-	-	A	A								G	G	C	T	C
IRIS_313-10020	0	C/T	NA	1	T	T/T	4	G	0	C	NA	0	G	NA	A	HODARAWALA::IRGC 67631-1::[IRIS 313-10020]	IRIS 313-10020	IRGC 120968	aus	13	C	T	T	-	-	-	C	C	C	T	C	-	-	-	-	C	-	G	C	T	T	-	A	-	G	G	C	T	T
IRIS_313-11479	1	C	NA	1	T	T/T	4	G	0	C	NA	0	G	NA	A	VANKALI::IRGC 53339-1::[IRIS 313-11479]	IRIS 313-11479	IRGC 127882	trop	0	C	T	T	-	-	-	C	C	C	T	C	-	-	-	-	C	-	G	C	T	T	-	A	-	G	G	C	T	T
IRIS_313-9172	0	T	1	0	C	1	5	G	0	C	NA	0	G	NA	A	ARC 7229::IRGC 12331-1::[IRIS 313-9172]	IRIS 313-9172	IRGC 126177	aro	85.5	C	T	T	-	-	-	C	C	C	T	C	-	-	-	-	C	-	G	C	T	T	-	A	-	G	G	C	T	C
IRIS_313-9137	0	T	1	0	C	1	5	G	0		NA	0	G	NA		ARC 10100::IRGC 20709-1::[IRIS 313-9137]	IRIS 313-9137	IRGC 121185	aus	58	C	T	T	-	-	-	C	C	C	T	C	-	-	-	-	C	-	G	C	T	T	-	A	-	G	G	C	T	T
IRIS_313-10780	0	C	NA	0	T	T/T	5	G	0	C	NA	0	G	NA	A	KETAN LALER::IRGC 17897-1::[IRIS 313-10780]	IRIS 313-10780	IRGC 127505	trop	0	C	T	T	-	-	-	C	C	C	T	C	-	-	-	-	C	-	G	C	T	T	-	A	-	G	G	C	T	T
IRIS_313-11618	1	T	0	0	C	1	5	G	0		NA	0	G	NA	A	UPRH 58::IRGC 61525-1::[IRIS 313-11618]	IRIS 313-11618	IRGC 127879	aus	87	C	T	T	-	-	-	C	C	C	T	C	-	-	-	-	A	A	G	C	T	T	-	A	-	G	G	C	T	C
IRIS_313-11629	1	C/T	NA	0	T	T/T	5	G	0	C	NA	0	G	NA	A	LATIJHABAR::IRGC 61991-1::[IRIS 313-11629]	IRIS 313-11629	IRGC 127554	aus	6	C	T	T	-	-	-	C	C	C	T	C	-	-	-	-	C	-	G	C	T	T	-	A	-	G	G	C	T	T
IRIS_313-11156	1	C	NA	0	T	T/T	5	G	0	C	NA	0	G	NA	A	KHUDWANI ACC 202::IRGC 34154-1::[IRIS 313-11156]	IRIS 313-11156	IRGC 127522	japx	0	C	T	T	-	-	-	C	C	C	T	C	-	-	-	-	C	-	G	C	T	T	-			G	G	C	T	T
IRIS_313-11456	1	C	NA	0	T	T/T	5	G	0	C	NA	0	G	NA	A	KOLAMBA::IRGC 52456-1::[IRIS 313-11456]	IRIS 313-11456	IRGC 127528	aus	13	C	T	T	-	-	-	C	C	C	T	C	-	-	-	-	C	-	G	C	T	T	-	A	-	G	G	C	T	T
IRIS_313-9405	0	C	NA	1	T	T/T	5	G	0	C	NA	0	G	NA	A	INGSA BELANAK::IRGC 43402-1::[IRIS 313-9405]	IRIS 313-9405	IRGC 126059	trop	0	C	T	T	-	-	-	C	C	C	T	C	-	-	-	-	C	-	G	C	T	T	-	A	-	G	G	C	T	T
IRIS_313-10762	1	C	NA	1	T	T/T	5	A	0	T	1	0	A	1	C	BANDI::IRGC 17214-1::[IRIS 313-10762]	IRIS 313-10762	IRGC 127207	ind3	27	C	T	T	-	-	-	C	C	C	T	C	-	-	-	-	A	A	G	C	T	T	-	A	-	G	G	C	T	T
IRIS_313-8509	1	C	NA	1	T	T/T	5	A	0	T	1	0	A	1	C	PUILLIPINA KATARI::IRGC 77293-1::[IRIS 313-8509]	IRIS 313-8509	IRGC 126261	ind2	18	C	T	T	-	-	-	C	C	C	T	C	-	-	-	-	C	-	G	C	T	T	-	A	-	G	G	C	T	T
IRIS_313-8380	NA	C	NA	1	T	T/T	5	G	0	C	NA	0	G	NA	A	SAN CHIAO TSWEN::IRGC 1565-1::[IRIS 313-8380]	IRIS 313-8380	IRGC 126123	ind1A	4	C	T	T	-	-	-	C	C	C	T	C	-	-	-	-	C	-	G	C	T	T	-	A	-	G	G	C	T	T
IRIS_313-11714	0	C	NA	NA	T	NA	5	G	0	C	NA	0	G	NA	A	CHAMPION::IRGC 66327-1::[IRIS 313-11714]	IRIS 313-11714	IRGC 127256	indx	0	C	T	T	-	-	-	C	C	C	T	C	-	-	-	-	C	-	G	C	T	T	-	A	-	G	G	C	T	T
IRIS_313-11992	0	C	NA	NA	T	NA	5	G	0	C	NA	0	G	NA	A	CHAO LAO SOUNG::IRGC 78799-1::[IRIS 313-11992]	IRIS 313-11992	IRGC 127266	ind3	13	C	T	T	-	-	-	C	C	C	T	C	-	-	-	-	C	-	G	C	T	T	-	A	-	G	G	C	T	T
IRIS_313-12236	1	C	NA	NA	T	NA	5	A	0	T	1	0	A	1	C	LAOZAOGU::IRGC 93444-1::[IRIS 313-12236]	IRIS 313-12236	IRGC 127552	ind1A	17	C	T	T	-	-	-	C	C	C	T	C	-	-	-	-	C	-	G	C	T	T	-	A	-	G	G	C	T	T
IRIS_313-9218	1	C	NA	NA	T	NA	5	A	0	T	1	0	A	1	C	KALO CHAKOL::IRGC 77258-1::[IRIS 313-9218]	IRIS 313-9218	IRGC 126136	ind2	14	C	T	T	-	-	-	C	C	C	T	C	-	-	-	-	C	-	G	C	T	T	-	A	-	G	G	C	T	T
IRIS_313-11348	1	NA	NA	NA	T	NA	5	G	0	C	NA	0	G	NA	A	AUS PADDY (RED)::IRGC 44978-1::[IRIS 313-11348]	IRIS 313-11348	IRGC 127192	aus	5	C	T	T	-	-	-	C	C	C	T	C	-	-	-	-	C	-	G	C	T	T	-	A	-	G	G	C	T	T
IRIS_313-8444	NA	C	NA	NA	T	NA	NA	G	0	C	NA	0	G	NA	A	M 203::IRGC 76309-1::[IRIS 313-8444]	IRIS 313-8444	IRGC 126118	temp	11	C	T	T	-	-	-	C	C	C	T	C	-	-	-	-	C	-	G	C	T	T	-	A	-	G	G	C	T	T
IRIS_313-10300	0	C	NA	0	T	T/T	0.3	A	1	T	0	0	A	1	C	CT 9506-18-7-1T-2::IRGC 116973-1::[IRIS 313-10300]	IRIS 313-10300	IRGC 125960	indx	22	C	T	T	-	-	-	C	C	C	T	C	-	-	-	-	A	A	G	C	T	T	-	A	-	G	G	C	T	T
IRIS_313-11354	1	C	NA	0	T	T/T	0.3	G	1	C	NA	0	G	NA	A	CAC 75::IRGC 45352-2::[IRIS 313-11354]	IRIS 313-11354	IRGC 128008	ind2	17	C	T	T	-	-	-	C	C	C	T	C	-	-	-	-	A	A	G	C	T	T	-	A	-	G	G	C	T	T
IRIS_313-11945	1	NA	NA	0	T	T/T	0.7	G	1	C	NA	0	G	NA	A	MALIKULI::IRGC 76237-1::[IRIS 313-11945]	IRIS 313-11945	IRGC 127598	ind2	24	C	T	T	-	-	-	C	C	C	T	C	-	-	-	-	A	A	G	C	T	T	-	A	-	G	G	C	T	T
IRIS_313-9325	1	C	NA	0	T	T/T	1.75	G	1	C	NA	0	G	NA	A	SADA RUPA::IRGC 77299-1::[IRIS 313-9325]	IRIS 313-9325	IRGC 125894	ind1B	13	C	T	T	-	-	-	C	C	C	T	C	-	-	-	-	A	A	G	C	T	T	-	A	-	G	G	C	T	T
IRIS_313-11462	1	C	NA	NA	T	NA	2.8	G	1	C	NA	0	G	NA	A	SALSI::IRGC 52833-1::[IRIS 313-11462]	IRIS 313-11462	IRGC 127780	aus	4	C	T	T	-	-	-	C	C	C	T	C	-	-	-	-	C	-	G	C	T	T	-	A	-	G	G	C	T	T
IRIS_313-11716	0	T	1	0	C	1	3	G	1	C	NA	0	G	NA	A	SOSSOKA::IRGC 66478-1::[IRIS 313-11716]	IRIS 313-11716	IRGC 127822	ind3	133	C	T	T	-	-	-	C	C	C	T	T	T	A	G	A	A	A	G	C	T	C	C	A	-	G	G	C	T	C
IRIS_313-11542	1	C	NA	1	T	T/T	3	G	1	C	NA	0	G	NA	A	KHAO KUM PAR::IRGC 57966-1::[IRIS 313-11542]	IRIS 313-11542	IRGC 132402	admix	6	C	T	T	-	-	-	C	C	C	T	C	-	-	-	-	C	-	G	C	T	T	-	A	-	G	G	C	T	T
IRIS_313-10119	NA	C	NA	1	T	T/T	3.5	G	1	C	NA	0	G	NA		GITANO::IRGC 82424-1::[IRIS 313-10119]	IRIS 313-10119	IRGC 125752	japx	0	C	T	T	-	-	-	C	C	C	T	C	-	-	-	-	C	-	G	C	T	T	-	A	-	G	G	C	T	T
IRIS_313-11928	NA	C	NA	1	T	T/T	4.1	G	1	C	NA	0	G	NA	A	DAYRON MARANGRAS::IRGC 75209-1::[IRIS 313-11928]	IRIS 313-11928	IRGC 127307	trop	0	C	T	T	-	-	-	C	C	C	T	C	-	-	-	-	C	-	G	C	T	T	-	A	-	G	G	C	T	T
IRIS_313-10228	0	NA	NA	1	NA	NA	5	A	1		NA	0	A	1	A	HAN NUO::IRGC 82350-1::[IRIS 313-10228]	IRIS 313-10228	IRGC 125758	temp	106.5																													T
IRIS_313-8147	1	C	NA	1	T	T/T	5	G	1	C	NA	0	G	NA	A	T 757::GERVEX 1316-C1::[IRIS 313-8147]	IRIS 313-8147	IRGC 122259	temp	0	C	T	T	-	-	-	C	C	C	T	C	-	-	-	-	C	-	G	C	T	T	-	A	-	G	G	C	T	T
IRIS_313-11780	0	T	1	0	C	1	1.5	G	NA	C	NA	0	G	NA	A	KILOMBERO::IRGC 69698-1::[IRIS 313-11780]	IRIS 313-11780	IRGC 127524	ind3	89	C	T	T	-	-	-	C	C	C	T	C	-	-	-	-	C	-	G	C	T	T	-	A	-	G	G	C	T	C
IRIS_313-9239	0	C	NA	0	T	T/T	3	G	NA	C	NA	0	G	NA	A	RIMBUN::IRGC 43741-1::[IRIS 313-9239]	IRIS 313-9239	IRGC 126268	trop	0	C	T	T	-	-	-	C	C	C	T	C	-	-	-	-	C	-	G	C	T	T	-	A	-	G	G	C	T	T
IRIS_313-10603	NA	C	NA	0	T	T/T	3.5	G	NA	C	NA	0	G	NA	A	UCP 122::IRGC 8794-1::[IRIS 313-10603]	IRIS 313-10603	IRGC 127871	aus	14	C	T	T	-	-	-	C	C	C	T	C	-	-	-	-	C	-	G	C	T	T	-	A	-	G	G	C	T	T
IRIS_313-11018	NA	T	NA	0	C	1	3.7	G	NA	C	NA	0	G	NA	A	MADISA::IRGC 27568-1::[IRIS 313-11018]	IRIS 313-11018	IRGC 127586	aus	90	C	T	T	-	-	-	C	C	C	T	C	-	-	-	-	A	A	G	C	T	T	-	A	-	G	G	C	T	C
IRIS_313-9725	0	C	NA	NA	T	NA	5	G	NA	C	NA	0	G	NA	A	DA DAO TOU::IRGC 59499-1::[IRIS 313-9725]	IRIS 313-9725	IRGC 125718	temp	2	C	T	T	-	-	-	C	C	C	T	C	-	-	-	-	C	-	G	C	T	T	-	A	-	G	G	C	T	T
IRIS_313-11432	1	C	NA	0	T	T/T	0.3	G	0	C	NA	1	G	NA	A	ISWAR KORA::IRGC 50674-1::[IRIS 313-11432]	IRIS 313-11432	IRGC 127443	admix	9	C	T	T	-	-	-	C	C	C	T	C	-	-	-	-	C	-	G	C	T	T	-	A	-	G	G	C	T	T
IRIS_313-11912	0	T	1	NA	C	NA	0.4	G	0	C	NA	1	G	NA	A	ESCONDE CACHO::IRGC 74305-1::[IRIS 313-11912]	IRIS 313-11912	IRGC 127361	ind3	77.5											C	-	-	-	-	C	-	G	C	T	T	-	A	-	G	G	C	T	C
IRIS_313-7815	0	T	1	0	C	1	0.5	G	0	C	NA	1	G	NA	A	WAS 198-B-3-1-3::C1::[IRIS 313-7815]	IRIS 313-7815	IRGC 122287	ind1B	83	C	T	T	-	-	-	C	C	C	T	C	-	-	-	-	A	A	G	C	T	T	-	A	-	G	G	C	T	C
IRIS_313-11745	1	C	NA	0	T	T/T	0.5	A	0	T	1	1	A	NA	C	AN FU ZHAN::IRGC 67878-1::[IRIS 313-11745]	IRIS 313-11745	IRGC 127123	ind1A	29	C	T	T	-	-	-	C	C	C	T	C	-	-	-	-	A	A	G	C	T	T	-	A	-	G	G	C	T	T
IRIS_313-10113	0	T	1	0	C	1	0.6	G	0	C	NA	1	G	NA	A	EX FOILAEIN (NAPUTO)::IRGC 81675-1::[IRIS 313-10113]	IRIS 313-10113	IRGC 125736	indx	72	C	T	T	-	-	-	C	C	C	T						C	-	G	C	T			A	-	G	G	C	T	C
IRIS_313-11292	0	NA	NA	0	T	T/T	0.7	G	0	C	NA	1	G	NA	A	ARC 10120::IRGC 42557-2::[IRIS 313-11292]	IRIS 313-11292	IRGC 127929	indx	17	C	T	T	-	-	-	C	C	C	T	C	-	-	-	-	A	A	G	C	T	T	-	A	-	G	G	C	T	T
IRIS_313-11207	0	NA	NA	1	T	T/T	0.75	G	0	C	NA	1	G	NA	A	PAIRJAT::IRGC 37252-2::[IRIS 313-11207]	IRIS 313-11207	IRGC 128126	ind2	13	C	T	T	-	-	-	C	C	C	T	C	-	-	-	-	A	A	G	C	T	T	-	A	-	G	G	C	T	T
IRIS_313-10985	1	C	NA	1	T	T/T	1.1	A	0	T	1	1	A	NA	C	GOBOL SAIL (BALAM)::IRGC 26624-2::[IRIS 313-10985]	IRIS 313-10985	IRGC 132424	ind2	9	C	T	T	-	-	-	C	C	C	T	C	-	-	-	-	C	-	G	C	T	T	-	A	-	G	G	C	T	T
IRIS_313-8765	1	C	NA	0	T	T/T	1.2	NA	0	T	1	1	NA	NA	C	TIMMURAY::IRGC 67857-1::[IRIS 313-8765]	IRIS 313-8765	IRGC 126284	aro	10	C	T	T	-	-	-	C	C	C	T	C	-	-	-	-	A	A	G	C	T	T	-	A	-	G	G	C	T	T
IRIS_313-10753	0	T	1	0	C	1	1.6	G	0	C	NA	1	G	NA	A	ZACATEPEC::IRGC 16901-2::[IRIS 313-10753]	IRIS 313-10753	IRGC 128205	ind1B	93	C	T	T	-	-	-	C	C	C	T	C	-	-	-	-	C	-	G	C	T	T	-	A	-	G	G	C	T	C
IRIS_313-11349	1	NA	NA	NA	T	NA	1.8	A	0	T	1	1	A	NA	C	BACHHAIKALMA::IRGC 45003-2::[IRIS 313-11349]	IRIS 313-11349	IRGC 127980	ind2	23	C	T	T	-	-	-	C	C	C	T	C	-	-	-	-	A	A	G	C	T	T	-	A	-	G	G	C	T	T
IRIS_313-10861	0	T	1	0	C	1	2	G	0	C	NA	1	G	NA	A	ARC 11276::IRGC 21278-1::[IRIS 313-10861]	IRIS 313-10861	IRGC 127134	aus	123	C	T	T	-	-	-	C	C	C	T	C	-	-	-	-	A	A	G	C	T	T	-	A	-	G	G	C	T	C
IRIS_313-11288	0	T	1	0	C	1	2	G	0	C	NA	1	G	NA	A	ARC 18434::IRGC 42429-2::[IRIS 313-11288]	IRIS 313-11288	IRGC 127970	indx	79	C	T	T	-	-	-	C	C	C	T	C	-	-	-	-	A	A								G	G	C	T	C
IRIS_313-10399	0	T	1	0	C	1	2	G	0		NA	1	G	NA	A	IRGA 346-111-2-1F::IRGC 117341-1::[IRIS 313-10399]	IRIS 313-10399	IRGC 120992	indx	59	C	T	T	-	-	-	C	C	C	T						C	-	G	C	T	T	-	A	-					C
IRIS_313-11494	1	C	NA	0	T	T/T	2	G	0	C	NA	1	G	NA	A	IC 25690::IRGC 53973-1::[IRIS 313-11494]	IRIS 313-11494	IRGC 128317	subtrop	19	C	T	T	-	-	-	C	C	C	T	C	-	-	-	-	A	A	G	C	T	T	-	A	-	G	G	C	T	T
IRIS_313-10664	NA	C	NA	0	T	T/T	2	A	0	T	1	1	A	NA	C	ARC 6052::IRGC 12196-1::[IRIS 313-10664]	IRIS 313-10664	IRGC 127163	ind2	23	C	T	T	-	-	-	C	C	C	T	C	-	-	-	-	A	A	G	C	T	T	-	A	-	G	G	C	T	T
IRIS_313-10576	0	T	1	1	C	0	2	G	0	C	NA	1	G	NA	A	BAANYALOJOPOIHUN::IRGC 7928-2::[IRIS 313-10576]	IRIS 313-10576	IRGC 127979	ind2	110.5	C	T	T	-	-	-	C	C	C	T	C	-	-	-	-	C	-	G	C	T			A	-	G	G	C	T	C
IRIS_313-10750	0	NA	NA	1	T	T/T	2	A	0	T	1	1	A	NA	C	TRANG LUA::IRGC 16781-1::[IRIS 313-10750]	IRIS 313-10750	IRGC 135804	ind3	12	C	T	T	-	-	-	C	C	C	T	C	-	-	-	-	C	-	G	C	T	T	-	A	-	G	G	C	T	T
IRIS_313-11282	1	C	NA	1	T	T/T	2	A	0	T	1	1	A	NA	C	ARC 15589::IRGC 42096-2::[IRIS 313-11282]	IRIS 313-11282	IRGC 132243	ind2	25	C	T	T	-	-	-	C	C	C	T	C	-	-	-	-	A	A	G	C	T	T	-	A	-	G	G	C	T	T
IRIS_313-11690	1	C	NA	1	T	T/T	2	G	0	C	NA	1	G	NA	A	KOCHUM::IRGC 64906-1::[IRIS 313-11690]	IRIS 313-11690	IRGC 132005	admix	1	C	T	T	-	-	-	C	C	C	T	C	-	-	-	-	C	-	G	C	T	T	-	A	-	G	G	C	T	T
IRIS_313-8256	1	C	NA	1	T	T/T	2	G	0	C	NA	1	G	NA	A	GERDEH::[IRIS 313-8256]	IRIS 313-8256	IRGC 117474	japx	0	C	T	T	-	-	-	C	C	C	T	C	-	-	-	-	C	-	G	C	T	T	-	A	-	G	G	C	T	T
IRIS_313-8170	0	C	NA	NA	T	NA	2	G	0	C	NA	1	G	NA	A	MEJANES 2::GERVEX 1560-C1::[IRIS 313-8170]	IRIS 313-8170	IRGC 122166	japx	0	C	T	T	-	-	-	C	C	C	T	C	-	-	-	-	C	-	G	C	T	T	-			G	G	C	T	T
IRIS_313-8523	0	C	NA	NA	T	NA	2	G	0	C	NA	1	G	NA	A	OS 4::[IRIS 313-8523]	IRIS 313-8523	IRGC 117543	trop	0	C	T	T	-	-	-	C	C	C	T	C	-	-	-	-	C	-	G	C	T	T	-	A	-	G	G	C	T	T
IRIS_313-10189	1	C	NA	NA	T	NA	2	A	0	T	1	1	A	NA	C	DA NUO (ZHAN)::IRGC 72025-1::[IRIS 313-10189]	IRIS 313-10189	IRGC 125723	ind1A	18	C	T	T	-	-	-	C	C	C	T	C	-	-	-	-	A	A	G	C	T	T	-	A	-	G	G	C	T	T
IRIS_313-9724	0	C	NA	1	T	T/T	2.1	G	0	C	NA	1	G	NA	A	AI DA ZHONG::IRGC 59348-1::[IRIS 313-9724]	IRIS 313-9724	IRGC 121246	temp	0	C	T	T	-	-	-	C	C	C	T	C	-	-	-	-	C	-	G	C	T	T	-	A	-	G	G	C	T	T
IRIS_313-10211	1	C	NA	1	T	T/T	2.1	A	0	T	1	1	A	NA	C	BAI HE::IRGC 76438-1::[IRIS 313-10211]	IRIS 313-10211	IRGC 125669	ind1A	19	C	T	T	-	-	-	C	C	C	T	C	-	-	-	-	A	A	G	C	T	T	-	A	-	G	G	C	T	T
IRIS_313-10903	0	T	1	NA	C	NA	2.1	G	0		NA	1	G	NA	A	KHSAY VENG::IRGC 22915-1::[IRIS 313-10903]	IRIS 313-10903	IRGC 135762	ind3	59	C	T	T	-	-	-	C	C	C	T	C	-	-	-	-	C	-	G	C	T	T	-	A	-	G	G	C	T	C
IRIS_313-11738	1	NA	NA	NA	T	NA	2.1	G	0	C	NA	1	G	NA	A	PAUNDRI::IRGC 67527-1::[IRIS 313-11738]	IRIS 313-11738	IRGC 127720	ind2	24	C	T	T	-	-	-	C	C	C	T	C	-	-	-	-	A	A	G	C	T	T	-	A	-	G	G	C	T	T
IRIS_313-10966	NA	C	NA	1	T	T/T	2.3	G/A	0	T	1	1	G/A	NA	C	HURANG ARISO LUTA::IRGC 26055-1::[IRIS 313-10966]	IRIS 313-10966	IRGC 127424	indx	19	C	T	T	-	-	-	C	C	C	T	C	-	-	-	-	A	A	G	C	T	T	-	A	-	G	G	C	T	T
IRIS_313-11200	0	T	1	0	C	1	2.33333	G	0	C	NA	1	G	NA	A	BR 52-87-1::IRGC 36849-2::[IRIS 313-11200]	IRIS 313-11200	IRGC 128002	ind1B	64.5											C	-	-	-	-	C	-	G	C	T	T	-	A	-	G	G	C	T	C
IRIS_313-11763	0	T	1	0	C	1	2.4	G	0		NA	1	G	NA	A	PJ 110::IRGC 68981-1::[IRIS 313-11763]	IRIS 313-11763	IRGC 127734	indx	138.5	C	T	T	-	-	-	C	C	C	T	C	-	-	-	-	A	A	G	C	T	C	C	C	C	G	G	C	T	C
IRIS_313-10883	0	C	NA	1	T	T/T	2.4	G	0	C	NA	1	G	NA	A	ARC 12490::IRGC 22095-1::[IRIS 313-10883]	IRIS 313-10883	IRGC 128224	admix	1	C	T	T	-	-	-	C	C	C	T	C	-	-	-	-	C	-	G	C	T	T	-	A	-	G	G	C	T	T
IRIS_313-10767	1	C	NA	NA	T	NA	2.625	G	0	C	NA	1	G	NA	A	DJANGGOT::IRGC 17491-2::[IRIS 313-10767]	IRIS 313-10767	IRGC 128032	trop	16	C	T	T	-	-	-	C	C	C	T	C	-	-	-	-	A	A	G	C	T	T	-	A	-	G	G	C	T	T
IRIS_313-10855	1	C	NA	1	T	T/T	2.66667	A	0	T	1	1	A	NA	C	ARC 10159::IRGC 20754-2::[IRIS 313-10855]	IRIS 313-10855	IRGC 132316	ind2	23	C	T	T	-	-	-	C	C	C	T	C	-	-	-	-	A	A	G	C	T	T	-	A	-	G	G	C	T	T
IRIS_313-10307	0	T	1	0	C	1	3	G	0	C	NA	1	G	NA	A	INIAP 6::IRGC 117002-1::[IRIS 313-10307]	IRIS 313-10307	IRGC 127050	indx	98	C	T	T	-	-	-	C	C	C	T	C	-	-	-	-	A	A	G	C	T	T	-	A	-	G	G	C	T	C
IRIS_313-11270	0	T	1	0	C	1	3	G	0	C	NA	1	G	NA	A	ARC 14663::IRGC 41671-2::[IRIS 313-11270]	IRIS 313-11270	IRGC 127959	aro	87	C	T	T	-	-	-	C	C	C	T	C	-	-	-	-	C	-	G	C	T	T	-	A	-	G	G	C	T	C
IRIS_313-11797	0	T	1	0	C	1	3	G	0	C	NA	1	G	NA	A	E ZI 32::IRGC 70127-1::[IRIS 313-11797]	IRIS 313-11797	IRGC 128289	ind1A	150	C	T	T	-	-	-	C	C	C	T	T	T	A	G	A	A	A	G	C	T	T	-	C	C	G	G	C	T	C
IRIS_313-10334	0	C	NA	0	T	T/T	3	G	0	C	NA	1	G	NA	A	B 6136 E-3-TB-0-1-5::IRGC 117311-1::[IRIS 313-10334]	IRIS 313-10334	IRGC 125952	ind1B	3	C	T	T	-	-	-	C	C	C	T	C	-	-	-	-	C	-	G	C	T	T	-	A	-	G	G	C	T	T
IRIS_313-12348	1	NA	NA	0	NA	NA	3	A	0	C	NA	1	A	NA	A	LOUK NOK::IRGC 107599-1::[IRIS 313-12348]	IRIS 313-12348	IRGC 127575	subtrop	128.5
IRIS_313-10865	1	C	NA	0	NA	NA	3	G	0	C	NA	1	G	NA	A	ARC 11424::IRGC 21380-2::[IRIS 313-10865]	IRIS 313-10865	IRGC 127938	subtrop	1	C	T	T	-	-	-	C	C	C	T	C	-	-	-	-	C	-	G	C	T	T	-	A	-	G	G	C	T	T
IRIS_313-10874	0	C	NA	1	T	T/T	3	G	0	C	NA	1	G	NA	A	ARC 11946::IRGC 21768-2::[IRIS 313-10874]	IRIS 313-10874	IRGC 132318	subtrop	0	C	T	T	-	-	-	C	C	C	T	C	-	-	-	-	C	-	G	C	T	T	-	A	-	G	G	C	T	T
IRIS_313-9523	0	C	NA	1	T	T/T	3	G	0	C	NA	1	G	NA	A	RIKUTO KEMOCHI::[IRIS 313-9523]	IRIS 313-9523	IRGC 117569	japx	1	C	T	T	-	-	-	C	C	C	T	C	-	-	-	-	C	-	G	C	T	T	-	A	-	G	G	C	T	T
IRIS_313-9730	1	C	NA	1	T	T/T	3	A	0	T	1	1	A	NA	C	BA SHI ZAO::IRGC 67903-1::[IRIS 313-9730]	IRIS 313-9730	IRGC 125675	ind1A	28	C	T	T	-	-	-	C	C	C	T	C	-	-	-	-	A	A	G	C	T	T	-	A	-	G	G	C	T	T
IRIS_313-11226	NA	C	NA	1	T	T/T	3	A	0	T	1	1	A	NA	C	SADAJIRA 19-258::IRGC 38293-2::[IRIS 313-11226]	IRIS 313-11226	IRGC 128153	ind2	19	C	T	T	-	-	-	C	C	C	T	C	-	-	-	-	A	A	G	C	T	T	-	A	-	G	G	C	T	T
IRIS_313-10725	0	T	1	NA	C	NA	3	G	0	C	NA	1	G	NA	A	ERNEST::IRGC 15884-2::[IRIS 313-10725]	IRIS 313-10725	IRGC 128518	indx	101	C	T	T	-	-	-	C	C	C	T	T	T	A	G	A	A	A	G	C	T	T	-	C	C	G	G	C	T	C
IRIS_313-12053	1	C	NA	0	NA	NA	3.1	G	0	C	NA	1	G	NA	A	FACAGRO 406::IRGC 82049-1::[IRIS 313-12053]	IRIS 313-12053	IRGC 127367	indx	12	C	T	T	-	-	-	C	C	C	T	C	-	-	-	-	C	-	G	C	T	T	-	A	-	G	G	C	T	T
IRIS_313-11577	1	C	NA	1	T	T/T	3.1	A	0	T	1	1	A	NA	C	LANG QIAN CHE::IRGC 59730-1::[IRIS 313-11577]	IRIS 313-11577	IRGC 127551	ind1A	19	C	T	T	-	-	-	C	C	C	T	C	-	-	-	-	A	A	G	C	T	T	-	A	-	G	G	C	T	T
IRIS_313-11068	0	NA	NA	NA	T	NA	3.1	G	0	C	NA	1	G	NA	A	PANKAIT 31::IRGC 29377-1::[IRIS 313-11068]	IRIS 313-11068	IRGC 128426	aro	2	C	T	T	-	-	-	C	C	C	T	C	-	-	-	-			G	C	T	T	-	A	-	G	G	C	T
IRIS_313-10884	NA	C	NA	1	T	T/T	3.11111	G	0	C	NA	1	G	NA	A	ARC 12493::IRGC 22098-1::[IRIS 313-10884]	IRIS 313-10884	IRGC 128225	subtrop	4	C	T	T	-	-	-	C	C	C	T	C	-	-	-	-	C	-	G	C	T	T	-	A	-	G	G	C	T	T
IRIS_313-9283	0	T	1	0	C	1	3.2	G	0		NA	1	G	NA	A	TAK SUFAID::IRGC 73127-1::[IRIS 313-9283]	IRIS 313-9283	IRGC 121134	aus	82	C	T	T	-	-	-	C	C	C	T	C	-	-	-	-	A	A	G	C	T	T	-			G	G	C	T	C
IRIS_313-10875	0	NA	NA	1	T	T/T	3.3	G	0	C	NA	1	G	NA	A	ARC 12021::IRGC 21837-1::[IRIS 313-10875]	IRIS 313-10875	IRGC 127141	aus	5	C	T	T	-	-	-	C	C	C	T	C	-	-	-	-	C	-	G	C	T	T	-	A	-	G	G	C	T	T
IRIS_313-11219	NA	C	NA	1	T	T/T	3.5	A	0	T	1	1	A	NA	C	BLACK 28-564::IRGC 37815-2::[IRIS 313-11219]	IRIS 313-11219	IRGC 127998	ind2	15	C	T	T	-	-	-	C	C	C	T	C	-	-	-	-	A	A	G	C	T	T	-	A	-	G	G	C	T	T
IRIS_313-10736	1	NA	NA	1	T	T/T	3.75	G	0	C	NA	1	G	NA	A	RERM BILASH::IRGC 16273-2::[IRIS 313-10736]	IRIS 313-10736	IRGC 128149	aus	5	C	T	T	-	-	-	C	C	C	T	C	-	-	-	-	C	-	G	C	T	T	-	A	-	G	G	C	T	T
IRIS_313-11510	0	T	1	0	C	1	3.9	G	0		NA	1	G	NA	A	A 69-1::IRGC 55305-1::[IRIS 313-11510]	IRIS 313-11510	IRGC 127102	indx	102	C	T	T	-	-	-	C	C	C	T	C	-	-	-	-	C	-	G	C	T	T	-	A	-	G	G	C	T	C
IRIS_313-12041	0	T	1	0	C	1	4	G	0	C	NA	1	G	NA	A	NOU::IRGC 81352-1::[IRIS 313-12041]	IRIS 313-12041	IRGC 132413	ind3	99	C	T	T	-	-	-	C	C	C	T	T	T	A	G	A	A	A	G	C	T	C	C	A	-	G	G	C	T	C
IRIS_313-10581	0	C	NA	0	T	T/T	4	G	0	C	NA	1	G	NA	A	P PEY SIQAT::IRGC 8129-1::[IRIS 313-10581]	IRIS 313-10581	IRGC 127741	trop	5	C	T	T	-	-	-	C	C	C	T	C	-	-	-	-	C	-	G	C	T	T	-	A	-	G	G	C	T	T
IRIS_313-11027	NA	NA	NA	0	T	T/T	4	G	0	C	NA	1	G	NA	A	JHONA 101::IRGC 27976-1::[IRIS 313-11027]	IRIS 313-11027	IRGC 127454	aus	4	C	T	T	-	-	-	C	C	C	T	C	-	-	-	-	C	-	G	C	T	T	-	A	-	G	G	C	T	T
IRIS_313-11268	NA	T	NA	0	C	1	4	G	0		NA	1	G	NA	A	ARC 14398::IRGC 41544-2::[IRIS 313-11268]	IRIS 313-11268	IRGC 127957	aro	66.5	C	T	T	-	-	-	C	C	C	T	C	-	-	-	-	C	-	G	C	T	T	-	A	-	G	G	C	T	C
IRIS_313-8690	0	NA	NA	1	NA	NA	4	G	0	C	NA	1	G	NA	A	NEP HOA VANG::[IRIS 313-8690]	IRIS 313-8690	IRGC 117537	japx	96.5
IRIS_313-10872	0	C	NA	1	T	T/T	4	G	0	C	NA	1	G	NA	A	ARC 11802::IRGC 21662-2::[IRIS 313-10872]	IRIS 313-10872	IRGC 132421	japx	0.5	C	T	T	-	-	-	C	C	C	T	C	-	-	-	-	C	-	G	C	T	T	-	A	-	G	G	C	T	T
IRIS_313-8627	0	C	NA	1	T	T/T	4	G	0	C	NA	1	G	NA	A	PRELUDE::IRGC 1790-1::[IRIS 313-8627]	IRIS 313-8627	IRGC 126260	trop	1	C	T	T	-	-	-	C	C	C	T	C	-	-	-	-	C	-	G	C	T	T	-	A	-	G	G	C	T	T
IRIS_313-11885	1	C	NA	1	T	T/T	4	A	0	T	1	1	A	NA	C	YANG WAN XIAN::IRGC 72886-1::[IRIS 313-11885]	IRIS 313-11885	IRGC 127899	ind1A	18	C	T	T	-	-	-	C	C	C	T	C	-	-	-	-	A	A	G	C	T	T	-	A	-	G	G	C	T	T
IRIS_313-8124	1	C	NA	1	T	T/T	4	G	0	C	NA	1	G	NA	A	OTA::GERVEX 1145-C1::[IRIS 313-8124]	IRIS 313-8124	IRGC 122187	japx	22	C	T	T	-	-	-	C	C	C	T	C	-	-	-	-	A	A	G	C	T	T	-	A	-	G	G	C	T	T
IRIS_313-8399	NA	C	NA	1	T	T/T	4	G	0	C	NA	1	G	NA	A	68-2::IRGC 14546-1::[IRIS 313-8399]	IRIS 313-8399	IRGC 126113	temp	0	C	T	T	-	-	-	C	C	C	T	C	-	-	-	-	C	-	G	C	T	T	-	A	-	G	G	C	T	T
IRIS_313-11293	1	T	0	NA	C	NA	4	G	0	C	NA	1	G	NA	A	ARC 10975::IRGC 42611-2::[IRIS 313-11293]	IRIS 313-11293	IRGC 127934	aro	66	C	T	T	-	-	-	C	C	C	T	C	-	-	-	-	C	-	G	C	T	T	-	A	-	G	G	C	T	C
IRIS_313-8859	1	C	NA	NA	T	NA	4.1	G	0	C	NA	1	G	NA	A	E ZI 96::IRGC 70188-1::[IRIS 313-8859]	IRIS 313-8859	IRGC 125738	ind1A	1	C	T	T	-	-	-	C	C	C	T	C	-	-	-	-	C	-	G	C	T	T	-	A	-	G	G	C	T	T
IRIS_313-11644	1	NA	NA	1	T	T/T	4.4	G	0	C	NA	1	G	NA	A	NCS 745::IRGC 62466-1::[IRIS 313-11644]	IRIS 313-11644	IRGC 127663	ind2	23	C	T	T	-	-	-	C	C	C	T	C	-	-	-	-	A	A	G	C	T	T	-	A	-	G	G	C	T	T
IRIS_313-11691	0	C	NA	1	T	T/T	4.6	G	0	C	NA	1	G	NA	A	SHANGYIPA::IRGC 64928-1::[IRIS 313-11691]	IRIS 313-11691	IRGC 128467	subtrop	1	C	T	T	-	-	-	C	C	C	T	C	-	-	-	-	C	-	G	C	T	T	-	A	-	G	G	C	T	T
IRIS_313-12244	1	C	NA	1	T	T/T	4.66667	G	0	C	NA	1	G	NA	A	PINAHULA::IRGC 93937-1::[IRIS 313-12244]	IRIS 313-12244	IRGC 128433	trop	0	C	T	T	-	-	-	C	C	C	T	C	-	-	-	-	C	-	G	C	T	T	-	A	-	G	G	C	T	T
IRIS_313-11363	1	C	NA	1	T	T/T	4.71429	G	0	C	NA	1	G	NA	A	KHEJURTHUPI::IRGC 46137-2::[IRIS 313-11363]	IRIS 313-11363	IRGC 128089	ind2	15	C	T	T	-	-	-	C	C	C	T	C	-	-	-	-	A	A	G	C	T	T	-	A	-	G	G	C	T	T
IRIS_313-11717	0	T	1	0	C	1	5	G	0	C	NA	1	G	NA	A	JATI MANI::IRGC 66565-1::[IRIS 313-11717]	IRIS 313-11717	IRGC 127450	indx	152	C	T	C	C	C	C	C	C	C	T	T	T	A	G	A	A	A	G	C	T	T	-	C	C	G	G	C	T	C
IRIS_313-11787	0	T	1	0	C	1	5	G	0	C	NA	1	G	NA	A	TANDAKAY FINGO::IRGC 69793-1::[IRIS 313-11787]	IRIS 313-11787	IRGC 127845	ind2	118	C	T	T	-	-	-	C	C	C	T	C	-	-	-	-	A	A	G	C	T	T	-	A	-	G	G	C	T	C
IRIS_313-11259	0	T	1	0	C	1	5	G	0		NA	1	G	NA	A	ARC 13515::IRGC 41134-2::[IRIS 313-11259]	IRIS 313-11259	IRGC 127949	aro	23	C	T	T	-	-	-	C	C	C	T	C	-	-	-	-	C	-								G	G	C	T	C
IRIS_313-11537	0	C	NA	0	T	T/T	5	G	0	C	NA	1	G	NA	A	J 6 IR 438 (WC 694)::IRGC 57599-1::[IRIS 313-11537]	IRIS 313-11537	IRGC 127446	trop	0	C	T	T	-	-	-	C	C	C	T	C	-	-	-	-	C	-	G	C	T	T	-	A	-	G	G	C	T	T
IRIS_313-9464	0	C	NA	0	T	T/T	5	G	0	C	NA	1	G	NA	A	SML ACORNI::IRGC 13389-1::[IRIS 313-9464]	IRIS 313-9464	IRGC 125903	admix	0	C	T	T	-	-	-	C	C	C	T	C	-	-	-	-	C	-	G	C	T	T	-	A	-	G	G	C	T	T
IRIS_313-10025	1	NA	NA	0	T	T/T	5	G	0	C	NA	1	G	NA	A	KALAPATLE::IRGC 68500-1::[IRIS 313-10025]	IRIS 313-10025	IRGC 125790	admix	0	C	T	T	-	-	-	C	C	C	T	C	-	-	-	-	C	-	G	C	T	T	-	A	-	G	G	C	T	T
IRIS_313-12349	1	C	NA	0	T	T/T	5	G	0	C	NA	1	G	NA	A	MAK KHEUA DENG::IRGC 107709-1::[IRIS 313-12349]	IRIS 313-12349	IRGC 127592	subtrop	18	C	T	T	-	-	-	C	C	C	T	C	-	-	-	-	A	A	G	C	T	T	-	A	-	G	G	C	T	T
IRIS_313-9880	NA	C	NA	0	T	T/T	5	G	0	C	NA	1	G	NA	A	PI 282203::IRGC 16292-1::[IRIS 313-9880]	IRIS 313-9880	IRGC 121471	temp	1	C	T	T	-	-	-	C	C	C	T	C	-	-	-	-	C	-	G	C	T	T	-	A	-	G	G	C	T	T
IRIS_313-9996	NA	C	NA	0	T	T/T	5	G	0	C	NA	1	G	NA	A	SUWEON 295::IRGC 58368-1::[IRIS 313-9996]	IRIS 313-9996	IRGC 126990	temp	0	C	T	T	-	-	-	C	C	C	T	C	-	-	-	-	C	-	G	C	T	T	-	A	-	G	G	C	T	T
IRIS_313-10440	0	NA	NA	1	NA	NA	5	A	0	C	NA	1	A	NA	A	NAGKAYAT::IRGC 584-1::[IRIS 313-10440]	IRIS 313-10440	IRGC 127642	temp	110.5
IRIS_313-11908	0	NA	NA	1	NA	NA	5	G	0	C	NA	1	G	NA	A	DUAN SHEN ZI::IRGC 73962-1::[IRIS 313-11908]	IRIS 313-11908	IRGC 128284	temp	118.5																							A	-
IRIS_313-11532	0	NA	NA	1	T	T/T	5	G	0	C	NA	1	G	NA	A	MARIA GAKIT::IRGC 57070-1::[IRIS 313-11532]	IRIS 313-11532	IRGC 132016	trop	2	C	T	T	-	-	-	C	C	C	T	C	-	-	-	-	C	-	G	C	T	T	-	A	-	G	G	C	T	T
IRIS_313-8745	0	C	NA	1	T	T/T	5	G	0	C	NA	1	G	NA	A	SD 120 SELN (CI 12320)::IRGC 1667-1::[IRIS 313-8745]	IRIS 313-8745	IRGC 126087	trop	15	C	T	T	-	-	-	C	C	C	T	C	-	-	-	-	A	A	G	C	T	T	-	A	-	G	G	C	T	T
IRIS_313-8960	0	C	NA	1	T	T/T	5	G	0	C	NA	1	G	NA	A	BLUEBONNET::IRGC 1799-1::[IRIS 313-8960]	IRIS 313-8960	IRGC 125688	trop	1	C	T	T	-	-	-	C	C	C	T	C	-	-	-	-	C	-	G	C	T	T	-	A	-	G	G	C	T	T
IRIS_313-9267	0	C	NA	1	T	T/T	5	G	0	C	NA	1	G	NA	A	CHIRGUA 1 I 22::IRGC 3408-1::[IRIS 313-9267]	IRIS 313-9267	IRGC 125703	trop	13	C	T	T	-	-	-	C	C	C	T	C	-	-	-	-	A	A	G	C	T	T	-	A	-	G	G	C	T	T
IRIS_313-9929	0	C	NA	1	T	T/T	5	G	0	C	NA	1	G	NA	A	GOBYERNO::IRGC 47216-1::[IRIS 313-9929]	IRIS 313-9929	IRGC 127048	trop	2	C	T	T	-	-	-	C	C	C	T	C	-	-	-	-	C	-	G	C	T	T	-	A	-	G	G	C	T	T
IRIS_313-9949	0	C	NA	1	T	T/T	5	G	0	C	NA	1	G	NA	A	PANNITHI::IRGC 51049-1::[IRIS 313-9949]	IRIS 313-9949	IRGC 126078	trop	24	C	T	T	-	-	-	C	C	C	T	C	-	-	-	-	A	A	G	C	T	T	-	A	-	G	G	C	T	T
IRIS_313-8614	1	C	NA	1	T	T/T	5	A	0	T	1	1	A	NA	C	RAJHUSAI (ACR 12)::IRGC 53630-1::[IRIS 313-8614]	IRIS 313-8614	IRGC 126264	ind2	16	C	T	T	-	-	-	C	C	C	T	C	-	-	-	-	C	-	G	C	T	T	-	A	-	G	G	C	T	T
IRIS_313-9926	1	C	NA	1	T	T/T	5	A	0	T	1	1	A	NA	C	TOURBE::IRGC 47066-1::[IRIS 313-9926]	IRIS 313-9926	IRGC 126162	indx	29	C	T	T	-	-	-	C	C	C	T	C	-	-	-	-	A	A	G	C	T	T	-	A	-	G	G	C	T	T
IRIS_313-10758	1	C	NA	1	T	T/T	5	G	0	C	NA	1	G	NA	A	AEN METAN::IRGC 17142-1::[IRIS 313-10758]	IRIS 313-10758	IRGC 132386	trop	18	C	T	T	-	-	-	C	C	C	T	C	-	-	-	-	A	A	G	C	T	T	-	A	-	G	G	C	T	T
IRIS_313-10931	1	C	NA	1	T	T/T	5	G	0	C	NA	1	G	NA	A	PAKWALAN::IRGC 24156-1::[IRIS 313-10931]	IRIS 313-10931	IRGC 132025	trop	0	C	T	T	-	-	-	C	C	C	T	C	-	-	-	-	C	-	G	C	T	T	-	A	-	G	G	C	T	T
IRIS_313-11652	1	C	NA	1	T	T/T	5	G	0	C	NA	1	G	NA	A	GONG SHE 9::IRGC 62693-1::[IRIS 313-11652]	IRIS 313-11652	IRGC 128303	temp	2	C	T	T	-	-	-	C	C	C	T	C	-	-	-	-	C	-	G	C	T	T	-	A	-	G	G	C	T	T
IRIS_313-8115	1	C	NA	1	T	T/T	5	G	0	C	NA	1	G	NA	A	FAMILIA 181::GERVEX 901-C1::[IRIS 313-8115]	IRIS 313-8115	IRGC 122046	japx	15	C	T	T	-	-	-	C	C	C	T	C	-	-	-	-	A	A	G	C	T	T	-	A	-	G	G	C	T	T
IRIS_313-8143	1	C	NA	1	T	T/T	5	G	0	C	NA	1	G	NA	A	SLAVA::GERVEX 1287-C1::[IRIS 313-8143]	IRIS 313-8143	IRGC 122252	japx	12	C	T	T	-	-	-	C	C	C	T	C	-	-	-	-	C	-	G	C	T	T	-	A	-	G	G	C	T	T
IRIS_313-11698	1	NA	NA	1	NA	NA	5	G	0		NA	1	G	NA	A	TAIPEI 167::IRGC 65371-1::[IRIS 313-11698]	IRIS 313-11698	IRGC 128479	aro	105
IRIS_313-11859	NA	C	NA	1	T	T/T	5	A	0	T	1	1	A	NA	C	DONG DU::IRGC 72037-1::[IRIS 313-11859]	IRIS 313-11859	IRGC 127339	ind1A	22	C	T	T	-	-	-	C	C	C	T	C	-	-	-	-	A	A	G	C	T	T	-	A	-	G	G	C	T	T
IRIS_313-11788	NA	C	NA	1	NA	NA	5	A	0	C	NA	1	A	NA	A	CANLUBANG::IRGC 69816-1::[IRIS 313-11788]	IRIS 313-11788	IRGC 127247	japx	128.5
IRIS_313-11439	NA	C	NA	1	T	T/T	5	G	0	C	NA	1	G	NA	A	NIRA PRIETO::IRGC 51145-1::[IRIS 313-11439]	IRIS 313-11439	IRGC 127680	trop	1	C	T	T	-	-	-	C	C	C	T	C	-	-	-	-	C	-	G	C	T	T	-	A	-	G	G	C	T	T
IRIS_313-8052	NA	C	NA	1	T	T/T	5	G	0	C	NA	1	G	NA	A	SMERALDO::GERVEX 138-C1::[IRIS 313-8052]	IRIS 313-8052	IRGC 122253	temp	0	C	T	T	-	-	-	C	C	C	T	C	-	-	-	-	C	-	G	C	T	T	-	A	-	G	G	C	T	T
IRIS_313-10534	1	C/T	NA	NA	T	NA	5	G	0	C	NA	1	G	NA	A	D 204-1::IRGC 6445-1::[IRIS 313-10534]	IRIS 313-10534	IRGC 127290	aus	14	C	T	T	-	-	-	C	C	C	T	C	-	-	-	-	C	-	G	C	T	T	-	A	-	G	G	C	T	T
IRIS_313-10853	1	C	NA	NA	T	NA	5	G	0	C	NA	1	G	NA	A	ARC 10028::IRGC 20656-2::[IRIS 313-10853]	IRIS 313-10853	IRGC 132239	japx	1	C	T	T	-	-	-	C	C	C	T	C	-	-	-	-	C	-	G	C	T	T	-	A	-	G	G	C	T	T
IRIS_313-12271	1	C	NA	NA	T	NA	5	G	0	C	NA	1	G	NA	A	BATIBATIKAN::IRGC 96098-1::[IRIS 313-12271]	IRIS 313-12271	IRGC 127215	trop	0	C	T	T	-	-	-	C	C	C	T	C	-	-	-	-	C	-	G	C	T	T	-	A	-	G	G	C	T	T
IRIS_313-9404	NA	C/T	NA	NA	NA	NA	5	G	0	C	NA	1	G	NA	A	YANGKUM (RED)::[IRIS 313-9404]	IRIS 313-9404	IRGC 117593	admix	13.5	C	T					C	C	C	T	C	-	-	-	-	C	-	G	C	T	T	-	A	-	G	G	C	T
IRIS_313-11246	1	C	NA	1	T	T/T	NA	G	0	C	NA	1	G	NA	A	7516-14::IRGC 40090-3::[IRIS 313-11246]	IRIS 313-11246	IRGC 132271	temp	0	C	T	T	-	-	-	C	C	C	T	C	-	-	-	-	C	-	G	C	T	T	-	A	-	G	G	C	T	T
IRIS_313-8049	NA	C	NA	1	T	T/T	NA	G	0	C	NA	1	G	NA	A	LORD::GERVEX 127-C1::[IRIS 313-8049]	IRIS 313-8049	IRGC 122150	japx	1	C	T	T	-	-	-	C	C	C	T	C	-	-	-	-	C	-	G	C	T	T	-	A	-	G	G	C	T	T
IRIS_313-8894	NA	C	NA	1	T	T/T	NA	G	0	C	NA	1	G	NA	A	LEKATAN::IRGC 71554-1::[IRIS 313-8894]	IRIS 313-8894	IRGC 126070	trop	1	C	T	T	-	-	-	C	C	C	T	C	-	-	-	-	C	-	G	C	T	T	-	A	-	G	G	C	T	T
IRIS_313-11616	1	NA	NA	NA	T	NA	NA	G	0	C	NA	1	G	NA	A	UPRH 31::IRGC 61503-1::[IRIS 313-11616]	IRIS 313-11616	IRGC 127878	admix	15	C	T	T	-	-	-	C	C	C	T	C	-	-	-	-	A	A	G	C	T	T	-	A	-	G	G	C	T	T
IRIS_313-8029	NA	C	NA	NA	T	NA	NA	G	0	C	NA	1	G	NA	A	GRITNA::GERVEX 71-C1::[IRIS 313-8029]	IRIS 313-8029	IRGC 122073	japx	0	C	T					C	C	C	T	C	-	-	-	-			G	C	T	T	-	A	-	G	G	C	T	T
IRIS_313-8066	NA	C	NA	NA	T	NA	NA	G	0	C	NA	1	G	NA	A	GHIBLI::GERVEX 187-C1::[IRIS 313-8066]	IRIS 313-8066	IRGC 122053	temp	0	C	T	T	-	-	-	C	C	C	T	C	-	-	-	-	C	-	G	C	T	T	-	A	-	G	G	C	T	T
IRIS_313-9924	1	C	NA	0	T	T/T	0.4	G	1		NA	1	G	NA	A	KN 1 B 361-1-8-6-9::IRGC 46974-1::[IRIS 313-9924]	IRIS 313-9924	IRGC 125805	indx	4	C	T	T	-	-	-	C	C	C	T	C	-	-	-	-	C	-	G	C	T	T	-	A	-	G	G	C	T	T
IRIS_313-11113	1	C	NA	NA	T	NA	0.9	G	1	C	NA	1	G	NA	A	KAL SHULI::IRGC 31665-2::[IRIS 313-11113]	IRIS 313-11113	IRGC 128069	ind2	18	C	T	T	-	-	-	C	C	C	T	C	-	-	-	-	A	A	G	C	T	T	-	A	-	G	G	C	T	T
IRIS_313-8880	0	NA	NA	1	T	T/T	1	G	1	C	NA	1	G	NA	A	PAGAIYAHAN::[IRIS 313-8880]	IRIS 313-8880	IRGC 117550	indx	6	C	T	T	-	-	-	C	C	C	T	C	-	-	-	-	A	A	G	C	T	T	-	A	-	G	G	C	T	T
IRIS_313-11786	0	C	NA	1	T	T/T	1	G	1	C	NA	1	G	NA	A	N'YA NOFF::IRGC 69749-1::[IRIS 313-11786]	IRIS 313-11786	IRGC 128411	ind3	22	C	T	T	-	-	-	C	C	C	T	C	-	-	-	-	A	A	G	C	T	T	-	A	-	G	G	C	T	T
IRIS_313-10932	1	C	NA	1	T	T/T	1	G	1	C	NA	1	G	NA	A	CHINA 1039 MUTANT (DWARF)::IRGC 24168-2::[IRIS 313-10932]	IRIS 313-10932	IRGC 128014	ind1A	4	C	T	T	-	-	-	C	C	C	T	C	-	-	-	-	C	-	G	C	T	T	-	A	-	G	G	C	T	T
IRIS_313-15908	0	T	1	0	C	1	2	G	1	C	NA	1	G	NA	A	COLOMBIA XXI::G1::[IRIS 313-15908]	IRIS 313-15908	IRGC 126955	aus	149	C	T	T	-	-	-	C	C	C	T	T	T	A	G	A	A	A	G	C	T	T	-	A	-	G	G	C	T	C
IRIS_313-10738	0	T	1	0	C	1	2.3	G	1	C	NA	1	G	NA	A	ANDEL WELUT::IRGC 16339-1::[IRIS 313-10738]	IRIS 313-10738	IRGC 131965	admix	71	C	T	T	-	-	-	C	C	C	T	C	-	-	-	-	C	-	G	C	T	T	-	A	-	G	G	C	T	C
IRIS_313-10047	0	NA	NA	0	T	T/T	2.5	G	1	C	NA	1	G	NA	A	EX MARABA GURUKU::IRGC 69582-1::[IRIS 313-10047]	IRIS 313-10047	IRGC 125737	ind1A	4	C	T	T	-	-	-	C	C	C	T	C	-	-	-	-	C	-	G	C	T	T	-	A	-	G	G	C	T	T
IRIS_313-11076	0	T	1	0	C	1	2.8	G	1	C	NA	1	G	NA	A	LAI NOK KHA::IRGC 29604-2::[IRIS 313-11076]	IRIS 313-11076	IRGC 128094	ind3	104	C	T	T	-	-	-	C	C	C	T	C	-	-	-	-	A	A	G	C	T	T	-	A	-	G	G	C	T	C
IRIS_313-10293	0	T	1	0	C	1	2.9	G	1	C	NA	1	G	NA	A	ECIA 24-107-1::IRGC 116978-1::[IRIS 313-10293]	IRIS 313-10293	IRGC 125962	ind1B	87	C	T	T	-	-	-	C	C	C	T	C	-	-	-	-	C	-	G	C	T	T	-	A	-	G	G	C	T	C
IRIS_313-10318	0	T	1	0	C	1	3	G	1	C	NA	1	G	NA	A	RUSTIC::IRGC 117026-1::[IRIS 313-10318]	IRIS 313-10318	IRGC 126085	indx	67	C	T	T	-	-	-	C	C	C	T	C	-	-	-	-	C	-	G	C	T	T	-	A	-	G	G	C	T	C
IRIS_313-11061	NA	T	NA	0	C	1	3	G	1	C	NA	1	G	NA	A	AUS 449::IRGC 29230-1::[IRIS 313-11061]	IRIS 313-11061	IRGC 127190	aus	68.5	C	T					C	C	C	T	C	-	-	-	-	C	-								G	G	C	T	C
IRIS_313-11818	0	NA	NA	1	T	T/T	3	G	1	C	NA	1	G	NA	A	LETYONE::IRGC 70753-1::[IRIS 313-11818]	IRIS 313-11818	IRGC 128361	indx	13	C	T	T	-	-	-	C	C	C	T	C	-	-	-	-	C	-	G	C	T	T	-	A	-	G	G	C	T	T
IRIS_313-10849	1	C	NA	1	T	T/T	3	G	1	C	NA	1	G	NA	A	ARC 7001::IRGC 20436-1::[IRIS 313-10849]	IRIS 313-10849	IRGC 127166	aus	1	C	T	T	-	-	-	C	C	C	T	C	-	-	-	-	C	-	G	C	T	T	-	A	-	G	G	C	T	T
IRIS_313-10247	0	T	1	0	C	1	3.2	G	1	C	NA	1	G	NA	A	AMISTAD 82::IRGC 116954-1::[IRIS 313-10247]	IRIS 313-10247	IRGC 125949	ind1B	66											C	-	-	-	-	C	-	G	C	T			A	-	G	G	C	T	C
IRIS_313-10605	1	NA	NA	NA	T	NA	3.2	G	1	C	NA	1	G	NA	A	DV 86::IRGC 8840-1::[IRIS 313-10605]	IRIS 313-10605	IRGC 127348	aus	3	C	T	T	-	-	-	C	C	C	T	C	-	-	-	-	C	-	G	C	T	T	-	A	-	G	G	C	T	T
IRIS_313-11665	1	C	NA	1	T	T/T	3.3	G	1	C	NA	1	G	NA	A	JIN HUA 258::IRGC 63670-1::[IRIS 313-11665]	IRIS 313-11665	IRGC 127464	ind1A	13	C	T	T	-	-	-	C	C	C	T	C	-	-	-	-	C	-	G	C	T	T	-	A	-	G	G	C	T	T
IRIS_313-11216	0	NA	NA	1	T	T/T	3.6	G	1	C	NA	1	G	NA	A	KHAMA 1183::IRGC 37685-2::[IRIS 313-11216]	IRIS 313-11216	IRGC 128082	aus	6	C	T	T	-	-	-	C	C	C	T	C	-	-	-	-	C	-	G	C	T	T	-	A	-	G	G	C	T	T
IRIS_313-11368	1	C	NA	1	T	T/T	3.66667	G	1	C	NA	1	G	NA	A	PANIKELASH::IRGC 46500-2::[IRIS 313-11368]	IRIS 313-11368	IRGC 128128	ind2	18	C	T	T	-	-	-	C	C	C	T	C	-	-	-	-	A	A	G	C	T	T	-	A	-	G	G	C	T	T
IRIS_313-10515	0	C	NA	1	T	T/T	3.85714	G	1	C	NA	1	G	NA	A	TAICHUNG WOO GEN 2::IRGC 5525-1::[IRIS 313-10515]	IRIS 313-10515	IRGC 127836	ind1A	5	C	T	T	-	-	-	C	C	C	T	C	-	-	-	-	C	-	G	C	T	T	-	A	-	G	G	C	T	T
IRIS_313-10134	0	T	1	0	C	1	4	G	1		NA	1	G	NA	A	PIN GAEW 56::IRGC 7887-1::[IRIS 313-10134]	IRIS 313-10134	IRGC 125871	ind3	105.5	C	T	T	-	-	-	C	C	C	T	T	T	A	G	A	A	A	G	C	T	T	-	A	-	G	G	C	T	C
IRIS_313-8073	1	T	0	1	C	0	4	G	1		NA	1	G	NA	A	DAWN CI 9534::GERVEX 481-C1::[IRIS 313-8073]	IRIS 313-8073	IRGC 122033	aus	63	C	T	C	C	C	C	C	C	C	T	C	-	-	-	-	A	A	G	C	T	T	-	A	-	G	G	C	T	C
IRIS_313-9469	1	NA	NA	1	T	T/T	4	G	1	C	NA	1	G	NA	A	TSAO SHENG LI 1::IRGC 1309-1::[IRIS 313-9469]	IRIS 313-9469	IRGC 125929	ind1A	13	C	T	T	-	-	-	C	C	C	T	C	-	-	-	-	C	-	G	C	T	T	-	A	-	G	G	C	T	T
IRIS_313-11568	1	C/T	NA	1	T	T/T	4	G	1	C	NA	1	G	NA	A	SATHIYA::IRGC 59225-1::[IRIS 313-11568]	IRIS 313-11568	IRGC 127789	ind1A	10	C	T	T	-	-	-	C	C	C	T	C	-	-	-	-	C	-	G	C	T	T	-	A	-	G	G	C	T	T
IRIS_313-11870	NA	NA	NA	1	T	T/T	4	G	1	C	NA	1	G	NA	A	NAN JING XIAO DAO::IRGC 72236-2::[IRIS 313-11870]	IRIS 313-11870	IRGC 132429	ind1A	13	C	T	T	-	-	-	C	C	C	T	C	-	-	-	-	C	-	G	C	T	T	-	A	-	G	G	C	T	T
IRIS_313-11355	0	C/T	NA	NA	T	NA	4	G	1	C	NA	1	G	NA	A	CN 44-40-7::IRGC 45368-1::[IRIS 313-11355]	IRIS 313-11355	IRGC 127286	indx	5	C	T	T	-	-	-	C	C	C	T	C	-	-	-	-	C	-	G	C	T	T	-	A	-	G	G	C	T	T
IRIS_313-9422	1	C	NA	NA	T	NA	4.1	G	1	C	NA	1	G	NA	A	CHUNGUR BALI::IRGC 25855-1::[IRIS 313-9422]	IRIS 313-9422	IRGC 120915	aus	14.5	C	T	T	-	-	-	C	C	C	T	C	-	-	-	-	C	-	G	C	T	T	-	A	-	G	G	C	T	T
IRIS_313-8988	0	T	1	0	C	1	4.3	G	1	C	NA	1	G	NA	A	BANIKAT::IRGC 67720-1::[IRIS 313-8988]	IRIS 313-8988	IRGC 125672	ind2	122	C	T	T	-	-	-	C	C	C	T	C	-	-	-	-	A	A	G	C	T	T	-	C	C	G	G	C	T	C
IRIS_313-11374	NA	T	NA	0	C	1	4.4	G	1	C	NA	1	G	NA	A	W 398::IRGC 46787-1::[IRIS 313-11374]	IRIS 313-11374	IRGC 127889	aus	81	C	T	T	-	-	-	C	C	C	T	C	-	-	-	-	A	A	G	C	T	T	-	A	-	G	G	C	T	C
IRIS_313-11597	1	C	NA	1	T	T/T	4.5	G	1	C	NA	1	G	NA	A	BHATA PYAGI::IRGC 60895-1::[IRIS 313-11597]	IRIS 313-11597	IRGC 127222	ind2	12	C	T	T	-	-	-	C	C	C	T	C	-	-	-	-	A	A	G	C	T	T	-	A	-	G	G	C	T	T
IRIS_313-11205	1	C	NA	1	T	T/T	4.625	A	1	T	0	1	A	NA	C	KAZALSAIL::IRGC 37161-2::[IRIS 313-11205]	IRIS 313-11205	IRGC 128075	ind2	29	C	T	T	-	-	-	C	C	C	T	C	-	-	-	-	A	A	G	C	T	T	-	A	-	G	G	C	T	T
IRIS_313-11407	0	T	1	NA	C	NA	4.7	G	1	C	NA	1	G	NA	A	BATCHA BHOG (SCENTED)::IRGC 49440-2::[IRIS 313-11407]	IRIS 313-11407	IRGC 127989	ind2	81	C	T	T	-	-	-	C	C	C	T	C	-	-	-	-	A	A	G	C	T	T	-	A	-	G	G	C	T	C
IRIS_313-9572	0	C	NA	1	T	T/T	4.9	G	1	C	NA	1	G	NA	A	ASU::IRGC 62154-1::[IRIS 313-9572]	IRIS 313-9572	IRGC 125658	indx	0	C	T	T	-	-	-	C	C	C	T	C	-	-	-	-	C	-	G	C	T	T	-	A	-	G	G	C	T	T
IRIS_313-11448	1	C	NA	1	T	T/T	4.9	G	1	C	NA	1	G	NA	C	BARAMANJ::IRGC 52067-1::[IRIS 313-11448]	IRIS 313-11448	IRGC 127209	ind2	13	C	T	T	-	-	-	C	C	C	T	C	-	-	-	-	A	A	G	C	T	T	-	A	-	G	G	C	T	T
IRIS_313-10151	0	T	1	0	C	1	5	G	1	C	NA	1	G	NA	A	RD 15::IRGC 47705-1::[IRIS 313-10151]	IRIS 313-10151	IRGC 126003	ind3	82	C	T	T	-	-	-	C	C	C	T	C	-	-	-	-	C	-	G	C	T	T	-	A	-	G	G	C	T	C
IRIS_313-11162	0	T	1	0	C	1	5	G	1	C	NA	1	G	NA	A	SABRAN::IRGC 34630-1::[IRIS 313-11162]	IRIS 313-11162	IRGC 127775	ind1B	58	C	T	T	-	-	-	C	C	C	T	C	-	-	-	-	C	-	G	C	T	T	-	A	-	G	G	C	T	C
IRIS_313-11174	0	T	1	0	C	1	5	G	1	C	NA	1	G	NA	A	SLO 19::IRGC 35157-1::[IRIS 313-11174]	IRIS 313-11174	IRGC 127817	aus	30	C	T	T	-	-	-	C	C	C	T						C	-	G	C	T			A	-
IRIS_313-11438	0	T	1	0	C	1	5	G	1	C	NA	1	G	NA	A	ZACATEPEC A 79::IRGC 51116-1::[IRIS 313-11438]	IRIS 313-11438	IRGC 127909	indx	63.5	C	T	T	-	-	-	C	C	C	T	C	-	-	-	-	C	-						A	-	G	G	C	T
IRIS_313-12127	0	T	1	0	C	1	5	G	1	C	NA	1	G	NA	A	INPONG::IRGC 85524-1::[IRIS 313-12127]	IRIS 313-12127	IRGC 127431	ind3	126	C	T	T	-	-	-	C	C	C	T	T	T	A	G	A	C	-	G	C	T	T	-	A	-	G	G	C	T	C
IRIS_313-12225	0	T	1	0	C	1	5	G	1	C	NA	1	G	NA	A	PA LAT NGAN::IRGC 91983-1::[IRIS 313-12225]	IRIS 313-12225	IRGC 127711	ind3	83	C	T	T	-	-	-	C	C	C	T	C	-	-	-	-	C	-	G	C	T	C	C	A	-	G	G	C	T	C
IRIS_313-12296	0	T	1	0	C	1	5	G	1	C	NA	1	G	NA	A	SABALINE::IRGC 98059-1::[IRIS 313-12296]	IRIS 313-12296	IRGC 127773	ind3	93	C	T	T	-	-	-	C	C	C	T	C	-	-	-	-	A	A	G	C	T			A	-	G	G	C	T	C
IRIS_313-7654	0	T	1	0	C	1	5	G	1	C	NA	1	G	NA	A	BOUAKE 189::C1::[IRIS 313-7654]	IRIS 313-7654	IRGC 126997	ind1B	65	C	T	T	-	-	-	C	C	C	T	C	-	-	-	-	C	-	G	C	T	T	-	A	-	G	G	C	T	C
IRIS_313-8554	0	T	1	0	C	1	5	G	1	C	NA	1	G	NA	A	ARC 11959::IRGC 21780-1::[IRIS 313-8554]	IRIS 313-8554	IRGC 121188	aus	131	C	T	C	C	C	C	C	C	C	T	C	-	-	-	-	A	A	G	C	T	T	-	A	-	G	G	C	T	C
IRIS_313-9641	0	T	1	0	C	1	5	G	1	C	NA	1	G	NA	A	BEGUM::IRGC 33990-1::[IRIS 313-9641]	IRIS 313-9641	IRGC 125602	aus	42	C	T	T	-	-	-	C	C	C	T	C	-	-	-	-	C	-	G	C	T
IRIS_313-11049	0	T	1	0	C	1	5	G	1		NA	1	G	NA	A	AUS 219::IRGC 29031-1::[IRIS 313-11049]	IRIS 313-11049	IRGC 127179	aus	104	C	T	T	-	-	-	C	C	C	T	C	-	-	-	-	A	A	G	C	T	T	-	A	-	G	G	C	T	C
IRIS_313-7688	0	T	1	0	C	1	5	G	1		NA	1	G	NA	A	IR 22::IRGC 11356-C1::[IRIS 313-7688]	IRIS 313-7688	IRGC 122091	ind1B	94	C	T	T	-	-	-	C	C	C	T	T	T	A	G	A	A	A	G	C	T	C	C	C	C	G	G	C	T	C
IRIS_313-8712	0	T	1	0	C	1	5	G	1		NA	1	G	NA	A	ARC 13829::[IRIS 313-8712]	IRIS 313-8712	IRGC 117426	aro	108	C	T	T	-	-	-	C	C	C	T	C	-	-	-	-	C	-	G	C	T					G	G	C	T	C
IRIS_313-8900	0	T	1	0	C	1	5	G	1		NA	1	G	NA	C	ARC 14654::IRGC 41663-1::[IRIS 313-8900]	IRIS 313-8900	IRGC 125650	ind2	60	C	T	T	-	-	-	C	C	C	T	C	-	-	-	-	C	-						A	-	G	G	C	T	C
IRIS_313-10594	0	NA	NA	0	T/C	T/C	5	G	1	C	NA	1	G	NA	A	DJ 29::IRGC 8505-1::[IRIS 313-10594]	IRIS 313-10594	IRGC 127322	aus	34.5	C	T	T	-	-	-	C	C	C	T	C	-	-	-	-	C	-						A	-	G	G	C	T	T/C
IRIS_313-9886	1	NA	NA	0	NA	NA	5	G	1	C	NA	1	G	NA	A	HUK ZO::IRGC 19760-1::[IRIS 313-9886]	IRIS 313-9886	IRGC 125767	temp	105
IRIS_313-11057	1	NA	NA	0	T	T/T	5	G	1	C	NA	1	G	NA	A	AUS 308::IRGC 29096-1::[IRIS 313-11057]	IRIS 313-11057	IRGC 127187	aus	3	C	T	T	-	-	-	C	C	C	T	C	-	-	-	-	C	-	G	C	T	T	-	A	-	G	G	C	T	T
IRIS_313-11054	1	C/T	NA	0	T	T/T	5	G	1	C	NA	1	G	NA	A	AUS 295::IRGC 29083-1::[IRIS 313-11054]	IRIS 313-11054	IRGC 127184	aus	3	C	T	T	-	-	-	C	C	C	T	C	-	-	-	-	C	-	G	C	T	T	-	A	-	G	G	C	T	T
IRIS_313-11565	1	C	NA	0	T	T/T	5	G	1	C	NA	1	G	NA	A	KUSUM KATIKI::IRGC 59099-1::[IRIS 313-11565]	IRIS 313-11565	IRGC 127536	ind2	21	C	T	T	-	-	-	C	C	C	T	C	-	-	-	-	A	A	G	C	T	T	-	A	-	G	G	C	T	T
IRIS_313-9449	1	C	NA	0	T	T/T	5	G	1	C	NA	1	G	NA	A	JAMBALI::IRGC 73101-1::[IRIS 313-9449]	IRIS 313-9449	IRGC 120996	aus	1	C	T	T	-	-	-	C	C	C	T	C	-	-	-	-	C	-	G	C	T	T	-	A	-	G	G	C	T	T
IRIS_313-10290	NA	T	NA	0	C	1	5	G	1	C	NA	1	G	NA	A	ELONI::IRGC 116980-1::[IRIS 313-10290]	IRIS 313-10290	IRGC 125963	ind1B	75.5	C	T	T	-	-	-	C	C	C	T	C	-	-	-	-	A	A						A	-	G	G	C	T	C
IRIS_313-10863	NA	T	NA	0	C	1	5	G	1	C	NA	1	G	NA	A	ARC 11322::IRGC 21315-2::[IRIS 313-10863]	IRIS 313-10863	IRGC 127937	ind2	110.5	C	T					C	C	C	T	T	T	A	G	A	A	A	G	C	T	C	C			G	G	C	T	C
IRIS_313-10997	NA	T	NA	0	C	1	5	G	1	C	NA	1	G	NA	A	CEMPO MANGGAR::IRGC 27107-1::[IRIS 313-10997]	IRIS 313-10997	IRGC 127250	ind3	111.5	C	T	T	-	-	-	C	C	C	T	C	-	-	-	-	C	-				T	-	A	-	G	G	C	T	C
IRIS_313-11888	NA	T	NA	0	C	1	5	G	1	C	NA	1	G	NA	A	KANGRI::IRGC 73104-1::[IRIS 313-11888]	IRIS 313-11888	IRGC 127488	aus	53	C	T	T	-	-	-	C	C	C	T	C	-	-	-	-	C	-	G	C	T	T	-	A	-	G	G	C	T	C
IRIS_313-8616	NA	T	NA	0	C	1	5	G	1	C	NA	1	G	NA	A	IR 5494 (BPH 1)::IRGC 24484-1::[IRIS 313-8616]	IRIS 313-8616	IRGC 131939	ind1B	96	C	T	C	C	C	C	C	C	C	T	C	-	-	-	-	A	A	G	C	T	T	-	C	C	G	G	C	T	C
IRIS_313-8930	NA	T	NA	0	C	1	5	G	1	C	NA	1	G	NA	A	MUKKALA BAZAL::IRGC 77279-1::[IRIS 313-8930]	IRIS 313-8930	IRGC 125844	ind1B	117	C	T	C	C	C	C	C	C	C	T	C	-	-	-	-	A	A	G	C	T	T	-/C	A	-/C	G	G	C	T	C
IRIS_313-11336	0	NA	NA	1	NA	NA	5	A	1	C	NA	1	A	NA	A	IREQUIN::IRGC 44476-2::[IRIS 313-11336]	IRIS 313-11336	IRGC 128519	temp	93.5
IRIS_313-10519	0	C/T	NA	1	T	T/T	5	G	1	C	NA	1	G	NA	A	ADT 22::IRGC 5901-1::[IRIS 313-10519]	IRIS 313-10519	IRGC 135733	ind2	18	C	T	T	-	-	-	C	C	C	T	C	-	-	-	-	A	A	G	C	T	T	-	A	-	G	G	C	T	T
IRIS_313-11413	0	C	NA	1	T	T/T	5	G	1	C	NA	1	G	NA	A	KALAR KAR::IRGC 49737-2::[IRIS 313-11413]	IRIS 313-11413	IRGC 132420	aus	13	C	T	T	-	-	-	C	C	C	T	C	-	-	-	-	C	-	G	C	T	T	-	A	-	G	G	C	T	T
IRIS_313-11606	0	C	NA	1	T	T/T	5	G	1	C	NA	1	G	NA	A	BOKDEL::IRGC 61085-1::[IRIS 313-11606]	IRIS 313-11606	IRGC 127233	ind2	7	C	T	T	-	-	-	C	C	C	T	C	-	-	-	-	A	A	G	C	T	T	-	A	-	G	G	C	T	T
IRIS_313-11822	0	C	NA	1	T	T/T	5	G	1	C	NA	1	G	NA	A	BHONDU PAREWA::IRGC 70802-1::[IRIS 313-11822]	IRIS 313-11822	IRGC 135738	ind2	24	C	T	T	-	-	-	C	C	C	T	C	-	-	-	-	A	A	G	C	T	T	-	A	-	G	G	C	T	T
IRIS_313-11899	0	C	NA	1	T	T/T	5	G	1	C	NA	1	G	NA	A	MAHA CHAI::IRGC 73517-1::[IRIS 313-11899]	IRIS 313-11899	IRGC 128373	indx	17	C	T	T	-	-	-	C	C	C	T	C	-	-	-	-	C	-	G	C	T	T	-	A	-	G	G	C	T	T
IRIS_313-7883	0	C	NA	1	T	T/T	5	G	1	C	NA	1	G	NA	A	GANIGI::IRGC 48698-C1::[IRIS 313-7883]	IRIS 313-7883	IRGC 122052	trop	0	C	T	T	-	-	-	C	C	C	T	C	-	-	-	-	C	-	G	C	T	T	-	A	-	G	G	C	T	T
IRIS_313-8208	0	C	NA	1	T	T/T	5	G	1	C	NA	1	G	NA	A	LUSITO IRRADIADO 859-85-2::GERVEX 1676-C1::[IRIS 313-8208]	IRIS 313-8208	IRGC 122152	temp	15	C	T	T	-	-	-	C	C	C	T	C	-	-	-	-	A	A	G	C	T	T	-	A	-	G	G	C	T	T
IRIS_313-9342	0	C	NA	1	T	T/T	5	G	1	C	NA	1	G	NA	A	LUA CHAN HUONG::IRGC 16800-1::[IRIS 313-9342]	IRIS 313-9342	IRGC 126236	ind3	8	C	T	T	-	-	-	C	C	C	T	C	-	-	-	-	A	A	G	C	T	T	-	A	-	G	G	C	T	T
IRIS_313-10976	1	NA	NA	1	T	T/T	5	G	1	C	NA	1	G	NA	A	LAKHSMI DIGHA::IRGC 26390-2::[IRIS 313-10976]	IRIS 313-10976	IRGC 132348	aus	2	C	T	T	-	-	-	C	C	C	T	C	-	-	-	-	C	-	G	C	T	T	-	A	-	G	G	C	T	T
IRIS_313-8727	1	NA	NA	1	T	T/T	5	G	1	C	NA	1	G	NA	A	T 315::IRGC 54792-1::[IRIS 313-8727]	IRIS 313-8727	IRGC 126280	ind2	46.5	C	-	T	-	-	-	C	C	C	T	C	-	-	-	-	C	-	G	C	T	T	-	A	-	G	G	C	T	T
IRIS_313-10836	1	C/T	NA	1	T	T/T	5	G	1	C	NA	1	G	NA	A	VELLA PERUVAZHA 0-68-12::IRGC 19588-1::[IRIS 313-10836]	IRIS 313-10836	IRGC 127887	ind2	13	C	T	T	-	-	-	C	C	C	T	C	-	-	-	-	A	A	G	C	T	T	-	A	-	G	G	C	T	T
IRIS_313-10430	1	C	NA	1	T	T/T	5	G	1	C	NA	1	G	NA	A	GINMASARI::IRGC 242-1::[IRIS 313-10430]	IRIS 313-10430	IRGC 128299	temp	0	C	T	T	-	-	-	C	C	C	T	C	-	-	-	-	C	-	G	C	T	T	-	A	-	G	G	C	T	T
IRIS_313-10477	1	C	NA	1	T	T/T	5	G	1	C	NA	1	G	NA	A	RUSTY LATE::IRGC 3506-1::[IRIS 313-10477]	IRIS 313-10477	IRGC 128454	indx	11	C	T	T	-	-	-	C	C	C	T	C	-	-	-	-	A	A	G	C	T	T	-	A	-	G	G	C	T	T
IRIS_313-11148	1	C	NA	1	T	T/T	5	G	1	C	NA	1	G	NA	C	YEBAW::IRGC 33875-2::[IRIS 313-11148]	IRIS 313-11148	IRGC 128203	ind3	4	C	T	T	-	-	-	C	C	C	T	C	-	-	-	-	C	-	G	C	T	T	-	A	-	G	G	C	T	T
IRIS_313-11574	1	C	NA	1	T	T/T	5	G	1	C	NA	1	G	NA	A	HEI TOU HONG::IRGC 59595-1::[IRIS 313-11574]	IRIS 313-11574	IRGC 128307	temp	0	C	T	T	-	-	-	C	C	C	T	C	-	-	-	-	C	-	G	C	T	T	-	A	-	G	G	C	T	T
IRIS_313-11746	1	C	NA	1	T	T/T	5	G	1	C	NA	1	G	NA	A	E 2070::IRGC 67981-1::[IRIS 313-11746]	IRIS 313-11746	IRGC 127349	ind1A	12	C	T	T	-	-	-	C	C	C	T	C	-	-	-	-	C	-	G	C	T	T	-	A	-	G	G	C	T	T
IRIS_313-11919	1	C	NA	1	T	T/T	5	G	1	C	NA	1	G	NA	A	LAKHA KUAR::IRGC 74760-1::[IRIS 313-11919]	IRIS 313-11919	IRGC 127542	ind2	23	C	T	T	-	-	-	C	C	C	T	C	-	-	-	-	A	A	G	C	T	T	-	A	-	G	G	C	T	T
IRIS_313-11964	1	C	NA	1	T	T/T	5	G	1	C	NA	1	G	NA	A	VUOTTA SAIL::IRGC 77306-1::[IRIS 313-11964]	IRIS 313-11964	IRGC 127888	ind2	21	C	T	T	-	-	-	C	C	C	T	C	-	-	-	-	A	A	G	C	T	T	-	A	-	G	G	C	T	T
IRIS_313-7770	1	C	NA	1	T	T/T	5	G	1	C	NA	1	G	NA	A	SAMBALA MALO::C1::[IRIS 313-7770]	IRIS 313-7770	IRGC 122239	ind1B	18	C	T	T	-	-	-	C	C	C	T	C	-	-	-	-	C	-	G	C	T	T	-	A	-	G	G	C	T	T
IRIS_313-8113	1	C	NA	1	T	T/T	5	G	1	C	NA	1	G	NA	A	ESCARLATE::GERVEX 887-C1::[IRIS 313-8113]	IRIS 313-8113	IRGC 122043	temp	0	C	T	T	-	-	-	C	C	C	T	C	-	-	-	-	C	-	G	C	T	T	-	A	-	G	G	C	T	T
IRIS_313-8114	1	C	NA	1	T	T/T	5	G	1	C	NA	1	G	NA	A	FAISCA::GERVEX 900-C1::[IRIS 313-8114]	IRIS 313-8114	IRGC 122045	temp	0	C	T	T	-	-	-	C	C	C	T	C	-	-	-	-	C	-	G	C	T	T	-	A	-	G	G	C	T	T
IRIS_313-8121	1	C	NA	1	T	T/T	5	G	1	C	NA	1	G	NA	A	MESTRE::GERVEX 1082-C1::[IRIS 313-8121]	IRIS 313-8121	IRGC 122169	japx	16	C	T	T	-	-	-	C	C	C	T	C	-	-	-	-	A	A	G	C	T	T	-	A	-	G	G	C	T	T
IRIS_313-8136	1	C	NA	1	T	T/T	5	G	1	C	NA	1	G	NA	A	SAFARI::GERVEX 1256-C1::[IRIS 313-8136]	IRIS 313-8136	IRGC 121819	temp	0	C	T	T	-	-	-	C	C	C	T	C	-	-	-	-	C	-	G	C	T	T	-	A	-	G	G	C	T	T
IRIS_313-8145	1	C	NA	1	T	T/T	5	G	1	C	NA	1	G	NA	A	SUPER::GERVEX 1304-C1::[IRIS 313-8145]	IRIS 313-8145	IRGC 122257	temp	0	C	T	T	-	-	-	C	C	C	T	C	-	-	-	-	C	-	G	C	T	T	-	A	-	G	G	C	T	T
IRIS_313-8433	1	C	NA	1	T	T/T	5	G	1	C	NA	1	G	NA	A	CHANG LE SAN SHU ZAO::IRGC 63561-1::[IRIS 313-8433]	IRIS 313-8433	IRGC 126115	ind1A	12	C	T	T	-	-	-	C	C	C	T	C	-	-	-	-	C	-	G	C	T	T	-	A	-	G	G	C	T	T
IRIS_313-9980	1	C	NA	1	T	T/T	5	G	1	C	NA	1	G	NA	A	FORTUNA INIA::IRGC 55865-1::[IRIS 313-9980]	IRIS 313-9980	IRGC 125741	japx	0	C	T	T	-	-	-	C	C	C	T	C	-	-	-	-	C	-	G	C	T	T	-	A	-	G	G	C	T	T
IRIS_313-11600	1	C	NA	1	T	T/T	5	G	1		NA	1	G	NA	A	KOTODESHI::IRGC 60982-1::[IRIS 313-11600]	IRIS 313-11600	IRGC 128353	ind2	7	C	T	T	-	-	-	C	C	C	T	C	-	-	-	-	A	A	G	C	T	T	-	A	-	G	G	C	T	T
IRIS_313-8757	1	NA	NA	1	T	T/T	5	NA	1	C	NA	1	NA	NA	A	NIRGUNI::IRGC 61127-1::[IRIS 313-8757]	IRIS 313-8757	IRGC 126000	ind2	13	C	T	T	-	-	-	C	C	C	T	C	-	-	-	-	A	A	G	C	T	T	-	A	-	G	G	C	T	T
IRIS_313-11918	NA	NA	NA	1	T	T/T	5	G	1	C	NA	1	G	NA	A	DILBAKSH::IRGC 74738-1::[IRIS 313-11918]	IRIS 313-11918	IRGC 128279	ind2	13	C	T	T	-	-	-	C	C	C	T	C	-	-	-	-	A	A	G	C	T	T	-	A	-	G	G	C	T	T
IRIS_313-11821	NA	C/T	NA	1	T	T/T	5	G	1	C	NA	1	G	NA	A	19::IRGC 70786-1::[IRIS 313-11821]	IRIS 313-11821	IRGC 127096	ind2	23	C	T	T	-	-	-	C	C	C	T	C	-	-	-	-	A	A	G	C	T	T	-	A	-	G	G	C	T	T
IRIS_313-10497	NA	C	NA	1	T	T/T	5	G	1	C	NA	1	G	NA	A	CE IN TSAN::IRGC 4362-1::[IRIS 313-10497]	IRIS 313-10497	IRGC 127249	ind1A	0	C	T	T	-	-	-	C	C	C	T	C	-	-	-	-	C	-	G	C	T	T	-	A	-	G	G	C	T	T
IRIS_313-11813	NA	C	NA	1	T	T/T	5	G	1	C	NA	1	G	NA	A	ZERO::IRGC 70707-2::[IRIS 313-11813]	IRIS 313-11813	IRGC 132372	ind3	24	C	T	T	-	-	-	C	C	C	T	C	-	-	-	-	A	A	G	C	T	T	-	A	-	G	G	C	T	T
IRIS_313-11916	NA	C	NA	1	T	T/T	5	G	1	C	NA	1	G	NA	A	MUDALIGA WEE::IRGC 74706-1::[IRIS 313-11916]	IRIS 313-11916	IRGC 128395	ind2	6	C	T	T	-	-	-	C	C	C	T	C	-	-	-	-	C	-	G	C	T	T	-	A	-	G	G	C	T	T
IRIS_313-8126	NA	C	NA	1	T	T/T	5	G	1	C	NA	1	G	NA	A	PLOVDIV 24::GERVEX 1168-C1::[IRIS 313-8126]	IRIS 313-8126	IRGC 122204	temp	1	C	T	T	-	-	-	C	C	C	T	C	-	-	-	-	C	-	G	C	T	T	-	A	-	G	G	C	T	T
IRIS_313-8216	NA	C	NA	1	T	T/T	5	G	1	C	NA	1	G	NA	A	ROXANI::GERVEX 1686-C1::[IRIS 313-8216]	IRIS 313-8216	IRGC 122222	temp	0	C	T	T	-	-	-	C	C	C	T	C	-	-	-	-	C	-	G	C	T	T	-	A	-	G	G	C	T	T
IRIS_313-8139	NA	C	NA	1	T	T/T	5	G	1		NA	1	G	NA	A	SANDOCA::GERVEX 1262-C1::[IRIS 313-8139]	IRIS 313-8139	IRGC 122240	japx	0	C	T	T	-	-	-	C	C	C	T	C	-	-	-	-	C	-	G	C	T	T	-	A	-	G	G	C	T	T
IRIS_313-8392	0	T	1	NA	C	NA	5	G	1	C	NA	1	G	NA	A	IR 2003-P7-7-4-2::IRGC 32671-1::[IRIS 313-8392]	IRIS 313-8392	IRGC 125970	ind1B	72	C	T	C	C	C	C	C	C	C	T	T	T	A	G	A	C	-	G	C	T	T	-	A	-	G	G	C	T	C
IRIS_313-10734	1	NA	NA	NA	T	NA	5	G	1	C	NA	1	G	NA	A	DEVARASI::IRGC 16173-1::[IRIS 313-10734]	IRIS 313-10734	IRGC 127315	aus	2	C	T	T	-	-	-	C	C	C	T	C	-	-	-	-	C	-	G	C	T	T	-	A	-	G	G	C	T	T
IRIS_313-11584	1	C	NA	NA	T	NA	5	G	1	C	NA	1	G	NA	A	YI SUI QI::IRGC 60088-1::[IRIS 313-11584]	IRIS 313-11584	IRGC 128508	temp	0	C	T	T	-	-	-	C	C	C	T	C	-	-	-	-	C	-	G	C	T	T	-	A	-	G	G	C	T	T
IRIS_313-9790	1	C	NA	NA	T	NA	5	G	1	C	NA	1	G	NA	A	JAPONES BALILLA::IRGC 5785-1::[IRIS 313-9790]	IRIS 313-9790	IRGC 125781	temp	18	C	T	T	-	-	-	C	C	C	T	C	-	-	-	-	A	A	G	C	T	T	-	A	-	G	G	C	T	T
IRIS_313-11346	1	C	NA	0	T	T/T	NA	G	1	C	NA	1	G	NA	A	WAGWAG PUTI::IRGC 44804-2::[IRIS 313-11346]	IRIS 313-11346	IRGC 132371	ind1B	23	C	T	T	-	-	-	C	C	C	T	C	-	-	-	-	A	A	G	C	T	T	-	A	-	G	G	C	T	T
IRIS_313-11175	NA	T	NA	0	C	1	NA	G	1	C	NA	1	G	NA	A	SONA AUS::IRGC 35160-1::[IRIS 313-11175]	IRIS 313-11175	IRGC 127821	aus	64	C	T					C	C	C	T	C	-	-	-	-	C	-	G	C	T	T	-			G	G	C	T	C
IRIS_313-11212	0	NA	NA	1	T	T/T	NA	G	1	C	NA	1	G	NA	A	KALOBONA::IRGC 37478-2::[IRIS 313-11212]	IRIS 313-11212	IRGC 132309	ind2	5	C	T	T	-	-	-	C	C	C	T	C	-	-	-	-	C	-	G	C	T	T	-	A	-	G	G	C	T	T
IRIS_313-11034	1	NA	NA	1	T	T/T	NA	G	1	C	NA	1	G	NA	A	SANTHI 206::IRGC 28215-1::[IRIS 313-11034]	IRIS 313-11034	IRGC 127786	aus	4	C	T	T	-	-	-	C	C	C	T	C	-	-	-	-	C	-	G	C	T	T	-	A	-	G	G	C	T	T
IRIS_313-8116	1	C	NA	1	T	T/T	NA	G	1	C	NA	1	G	NA	A	HAREM::GERVEX 929-C1::[IRIS 313-8116]	IRIS 313-8116	IRGC 122077	japx	0	C	T	T	-	-	-	C	C	C	T	C	-	-	-	-	C	-	G	C	T	T	-	A	-	G	G	C	T	T
IRIS_313-10561	1	C	NA	1	T	T/T	0	G	NA	C	NA	1	G	NA	A	NAN TEO 14::IRGC 7304-1::[IRIS 313-10561]	IRIS 313-10561	IRGC 127645	ind1A	12	C	T	T	-	-	-	C	C	C	T	C	-	-	-	-	C	-	G	C	T	T	-	A	-	G	G	C	T	T
IRIS_313-10854	0	T	1	0	C	1	0.9	G	NA	C	NA	1	G	NA	A	ARC 10145::IRGC 20744-1::[IRIS 313-10854]	IRIS 313-10854	IRGC 127127	aus	83	C	T	T	-	-	-	C	C	C	T	C	-	-	-	-	C	-	G	C	T	T	-			G	G	C	T	C
IRIS_313-9723	NA	C	NA	1	T	T/T	1.2	G	NA	C	NA	1	G	NA	A	AI ZI HUNG::IRGC 51255-1::[IRIS 313-9723]	IRIS 313-9723	IRGC 126129	ind1A	4	C	T	T	-	-	-	C	C	C	T	C	-	-	-	-	C	-	G	C	T	T	-	A	-	G	G	C	T	T
IRIS_313-11951	1	NA	NA	1	T	T/T	2	G	NA	C	NA	1	G	NA	A	MIAO ZHAN::IRGC 76691-1::[IRIS 313-11951]	IRIS 313-11951	IRGC 127625	ind1A	3	C	T	T	-	-	-	C	C	C	T	C	-	-	-	-	C	-	G	C	T	T	-	A	-	G	G	C	T	T
IRIS_313-9976	1	NA	NA	1	T	T/T	2.3	G	NA	C	NA	1	G	NA	A	SSANGDUJO::IRGC 55632-1::[IRIS 313-9976]	IRIS 313-9976	IRGC 125906	ind1A	0	C	T	T	-	-	-	C	C	C	T	C	-	-	-	-	C	-	G	C	T	T	-	A	-	G	G	C	T	T
IRIS_313-10609	1	C	NA	NA	T	NA	2.9	G	NA	C	NA	1	G	NA	A	MATHOLUWA::IRGC 8901-1::[IRIS 313-10609]	IRIS 313-10609	IRGC 127612	indx	20	C	T	T	-	-	-	C	C	C	T	C	-	-	-	-	C	-	G	C	T	T	-	A	-	G	G	C	T	T
IRIS_313-11195	0	C	NA	1	T	T/T	3	G	NA	C	NA	1	G	NA	A	KHAW KAR 13::IRGC 36711-1::[IRIS 313-11195]	IRIS 313-11195	IRGC 128344	subtrop	15	C	T	T	-	-	-	C	C	C	T	C	-	-	-	-	A	A	G	C	T	T	-	A	-	G	G	C	T	T
IRIS_313-11489	0	T	1	NA	C	NA	3	G	NA	C	NA	1	G	NA	A	KALU T 139::IRGC 53670-1::[IRIS 313-11489]	IRIS 313-11489	IRGC 127482	aus	131	C	T	C	C	C	C	C	C	C	T	T	T	A	G	A	C	-/A	G	C	T	T	-/A	A	-/A	G	G	C	T	C
IRIS_313-10585	1	C	NA	NA	T	NA	3	G	NA	C	NA	1	G	NA	A	UKON NISHIKI::IRGC 8314-1::[IRIS 313-10585]	IRIS 313-10585	IRGC 128494	admix	0	C	T	T	-	-	-	C	C	C	T	C	-	-	-	-	C	-	G	C	T	T	-	A	-	G	G	C	T	T
IRIS_313-11163	1	C	NA	NA	T	NA	3	G	NA	C	NA	1	G	NA	A	NATEL BORO::IRGC 34749-1::[IRIS 313-11163]	IRIS 313-11163	IRGC 127652	aus	1	C	T	T	-	-	-	C	C	C	T	C	-	-	-	-	C	-	G	C	T	T	-	A	-	G	G	C	T	T
IRIS_313-10768	0	T	1	1	C	0	3.4	G	NA		NA	1	G	NA	A	GADABUNG (GUNDIL)::IRGC 17569-2::[IRIS 313-10768]	IRIS 313-10768	IRGC 132423	ind3	72	C	T	T	-	-	-	C	C	C	T	C	-	-	-	-	C	-	G	C	T	T	-	A	-	G	G	C	T	C
IRIS_313-11974	0	T	1	0	C	1	4	G	NA	C	NA	1	G	NA	A	NKUMBAN NDINGO::IRGC 77718-1::[IRIS 313-11974]	IRIS 313-11974	IRGC 135575	ind3	79	C	T	T	-	-	-	C	C	C	T	C	-	-	-	-	A	A	G	C	T	T	-	A	-	G	G	C	T	C
IRIS_313-11038	1	C	NA	1	T	T/T	4	G	NA	C	NA	1	G	NA	A	AI NAN TSAO 39::IRGC 28461-2::[IRIS 313-11038]	IRIS 313-11038	IRGC 127924	ind1A	5	C	T	T	-	-	-	C	C	C	T	C	-	-	-	-	C	-	G	C	T	T	-	A	-	G	G	C	T	T
IRIS_313-8599	1	C	NA	NA	T	NA	4	G	NA	C	NA	1	G	NA	A	BUE GA WA::IRGC 60824-1::[IRIS 313-8599]	IRIS 313-8599	IRGC 127041	subtrop	0.5	C	T	T	-	-	-	C	C	C	T	C	-	-	-	-	C	-	G	C	T	T	-	A	-	G	G	C	T	T
IRIS_313-8024	NA	C	NA	NA	T	NA	4	G	NA	C	NA	1	G	NA	A	RIBE 253::GERVEX 54-C1::[IRIS 313-8024]	IRIS 313-8024	IRGC 122217	temp	0	C	T	T	-	-	-	C	C	C	T	C	-	-	-	-	C	-	G	C	T	T	-	A	-	G	G	C	T	T
IRIS_313-9438	NA	C	NA	NA	T	NA	4	NA	NA	C	NA	1	NA	NA	A	7507-137::IRGC 40081-1::[IRIS 313-9438]	IRIS 313-9438	IRGC 121242	temp	0	C	T	T	-	-	-	C	C	C	T	C	-	-	-	-	C	-	G	C	T	T	-	A	-	G	G	C	T	T
IRIS_313-7766	1	C	NA	1	T	T/T	4.1	G	NA	C	NA	1	G	NA	A	SAHEL 108::C1::[IRIS 313-7766]	IRIS 313-7766	IRGC 122232	ind1B	23	C	T	T	-	-	-	C	C	C	T	C	-	-	-	-	A	A	G	C	T	T	-	A	-	G	G	C	T	T
IRIS_313-8142	1	C	NA	1	T	T/T	4.1	G	NA	C	NA	1	G	NA	A	SETTANTUNO::GERVEX 1279-C1::[IRIS 313-8142]	IRIS 313-8142	IRGC 122249	temp	0	C	T	T	-	-	-	C	C	C	T	C	-	-	-	-	C	-	G	C	T	T	-	A	-	G	G	C	T	T
IRIS_313-9066	1	C	NA	1	T	T/T	4.1	G	NA	C	NA	1	G	NA	A	AUS 177::IRGC 29009-1::[IRIS 313-9066]	IRIS 313-9066	IRGC 125659	ind1B	0	C	T	T	-	-	-	C	C	C	T	C	-	-	-	-	C	-	G	C	T	T	-	A	-	G	G	C	T	T
IRIS_313-11114	0	NA	NA	1	T	T/T	4.4	G	NA	C	NA	1	G	NA	A	BIRUI SAIL::IRGC 31745-2::[IRIS 313-11114]	IRIS 313-11114	IRGC 132305	ind2	15	C	T	T	-	-	-	C	C	C	T	C	-	-	-	-	A	A	G	C	T	T	-	A	-	G	G	C	T	T
IRIS_313-8167	1	C	NA	1	T	T/T	4.44444	G	NA	C	NA	1	G	NA	A	DELTA::GERVEX 1519-C1::[IRIS 313-8167]	IRIS 313-8167	IRGC 122303	japx	0	C	T	T	-	-	-	C	C	C	T	C	-	-	-	-	C	-	G	C	T	T	-	A	-	G	G	C	T	T
IRIS_313-11973	1	C	NA	1	T	T/T	4.6	G	NA	C	NA	1	G	NA	A	NOINJO::IRGC 77669-1::[IRIS 313-11973]	IRIS 313-11973	IRGC 132020	temp	0	C	T	T	-	-	-	C	C	C	T	C	-	-	-	-	C	-	G	C	T	T	-	A	-	G	G	C	T	T
IRIS_313-10279	0	T	1	0	C	1	4.9	G	NA	C	NA	1	G	NA	A	JUMA 62::IRGC 117011-1::[IRIS 313-10279]	IRIS 313-10279	IRGC 126066	indx	77											C	-	-	-	-	C	-	G	C	T	T	-	C	C	G	G	C	T	C
IRIS_313-7911	0	T	1	0	C	1	5	G	NA	C	NA	1	G	NA	A	IR 72967-12-2-3::C1::[IRIS 313-7911]	IRIS 313-7911	IRGC 122111	ind1B	102	C	T					C	C	C	T	T	T	A	G	A	A	A	G	C	T	T	-	C	C	G	G	C	T	C
IRIS_313-8903	0	T	1	0	C	1	5	G	NA		NA	1	G	NA	A	BPI 76 NON SENSITIVE (GREEN)::IRGC 9790-1::[IRIS 313-8903]	IRIS 313-8903	IRGC 120902	ind3	81											C	-	-	-	-	C	-	G	C	T	T	-	A	-	G	G	C	T	C
IRIS_313-9661	0	NA	NA	0	T	T/T	5	G	NA	C	NA	1	G	NA	A	LENJA MURALI::IRGC 66815-1::[IRIS 313-9661]	IRIS 313-9661	IRGC 121038	aus	15.5	C	T	T	-	-	-	C	C	C	T	C	-	-	-	-	C	-	G	C	T	T	-	A	-	G	G	C	T	T
IRIS_313-11248	1	C	NA	0	T	T/T	5	G	NA	C	NA	1	G	NA	A	NIAW KHAMIN::IRGC 40222-1::[IRIS 313-11248]	IRIS 313-11248	IRGC 127676	trop	0	C	T	T	-	-	-	C	C	C	T	C	-	-	-	-	C	-	G	C	T	T	-	A	-	G	G	C	T	T
IRIS_313-8204	1	C	NA	0	T	T/T	5	G	NA	C	NA	1	G	NA	A	S 102::GERVEX 1671-C1::[IRIS 313-8204]	IRIS 313-8204	IRGC 121817	temp	1	C	T	T	-	-	-	C	C	C	T	C	-	-	-	-	C	-	G	C	T	T	-	A	-	G	G	C	T	T
IRIS_313-10964	NA	C	NA	0	T	T/T	5	G	NA	C	NA	1	G	NA	A	SADUMONI::IRGC 25919-1::[IRIS 313-10964]	IRIS 313-10964	IRGC 127777	aus	1	C	T	T	-	-	-	C	C	C	T	C	-	-	-	-	C	-	G	C	T	T	-	A	-	G	G	C	T	T
IRIS_313-11110	0	NA	NA	1	T	T/T	5	G	NA	C	NA	1	G	NA	A	SAYAM::IRGC 31538-2::[IRIS 313-11110]	IRIS 313-11110	IRGC 128159	ind2	5	C	T	T	-	-	-	C	C	C	T	C	-	-	-	-	C	-	G	C	T	T	-	A	-	G	G	C	T	T
IRIS_313-10333	0	C	NA	1	T	T/T	5	G	NA	C	NA	1	G	NA	A	B 6136-3-TB-0-1-5::IRGC 117312-1::[IRIS 313-10333]	IRIS 313-10333	IRGC 125951	ind1B	13	C	T	T	-	-	-	C	C	C	T	C	-	-	-	-	C	-	G	C	T	T	-	A	-	G	G	C	T	T
IRIS_313-10835	1	C	NA	1	T	T/T	5	G	NA	C	NA	1	G	NA	A	PERUNEL 0-69-18::IRGC 19581-1::[IRIS 313-10835]	IRIS 313-10835	IRGC 127727	ind2	22	C	T	T	-	-	-	C	C	C	T	C	-	-	-	-	A	A	G	C	T	T	-	A	-	G	G	C	T	T
IRIS_313-11806	1	C	NA	1	T	T/T	5	G	NA	C	NA	1	G	NA	A	78 XUAN WU::IRGC 70475-1::[IRIS 313-11806]	IRIS 313-11806	IRGC 127101	ind1A	13	C	T	T	-	-	-	C	C	C	T	C	-	-	-	-	C	-	G	C	T	T	-	A	-	G	G	C	T	T
IRIS_313-11869	1	C	NA	1	T	T/T	5	G	NA	C	NA	1	G	NA	A	MA WEI ZHAN::IRGC 72220-1::[IRIS 313-11869]	IRIS 313-11869	IRGC 127615	ind1A	13	C	T	T	-	-	-	C	C	C	T	C	-	-	-	-	C	-	G	C	T	T	-	A	-	G	G	C	T	T
IRIS_313-8128	1	C	NA	1	T	T/T	5	G	NA	C	NA	1	G	NA	A	PRECOZ 2 F A::GERVEX 1182-C1::[IRIS 313-8128]	IRIS 313-8128	IRGC 122208	temp	1	C	T	T	-	-	-	C	C	C	T	C	-	-	-	-	C	-	G	C	T	T	-	A	-	G	G	C	T	T
IRIS_313-8137	1	C	NA	1	T	T/T	5	G	NA	C	NA	1	G	NA	A	SAGRES::GERVEX 1258-C1::[IRIS 313-8137]	IRIS 313-8137	IRGC 121820	japx	0	C	T	T	-	-	-	C	C	C	T	C	-	-	-	-	C	-	G	C	T	T	-	A	-	G	G	C	T	T
IRIS_313-8305	1	C	NA	1	T	T/T	5	G	NA	C	NA	1	G	NA	A	URAIBOOL::IRGC 52785-1::[IRIS 313-8305]	IRIS 313-8305	IRGC 126289	ind2	18	C	T	T	-	-	-	C	C	C	T	C	-	-	-	-	A	A	G	C	T	T	-	A	-	G	G	C	T	T
IRIS_313-10862	NA	C	NA	1	T	T/T	5	G	NA	C	NA	1	G	NA	A	ARC 11281::IRGC 21283-1::[IRIS 313-10862]	IRIS 313-10862	IRGC 127135	japx	1	C	T	T	-	-	-	C	C	C	T	C	-	-	-	-	C	-	G	C	T	T	-	A	-	G	G	C	T	T
IRIS_313-8963	1	C	NA	1	T	T/T	NA	G	NA	C	NA	1	G	NA	A	BATHURI::IRGC 25838-1::[IRIS 313-8963]	IRIS 313-8963	IRGC 120887	aus	2.5	C	T	T	-	-	-	C	C	C	T	C	-	-	-	-	C	-	G	C	T	T	-	A	-	G	G	C	T	T
IRIS_313-11655	NA	NA	NA	NA	NA	NA	NA	A	NA	C	NA	1	A	NA	A	SI WAN 14::IRGC 63019-1::[IRIS 313-11655]	IRIS 313-11655	IRGC 127815	temp	110.5
IRIS_313-11214	NA	T	NA	NA	C	NA	NA	G	NA	C	NA	1	G	NA	A	SHITTA AMAN::IRGC 37596-1::[IRIS 313-11214]	IRIS 313-11214	IRGC 127799	aus	68											C	-	-	-	-	C	-	G	C	T	T	-	A	-	G	G	C	T	C
IRIS_313-15900	NA	C	NA	NA	T	NA	NA	G	NA	C	NA	1	G	NA	A	IR 07F287::G1::[IRIS 313-15900]	IRIS 313-15900	IRGC 126960	indx	13	C	T	T	-	-	-	C	C	C	T	C	-	-	-	-	C	-	G	C	T	T	-	A	-	G	G	C	T	T
IRIS_313-10275	0	NA	NA	0	T	T/T	0	A	0	T	1	NA	A	NA	C	ICTA MOTAGUA::IRGC 116995-1::[IRIS 313-10275]	IRIS 313-10275	IRGC 125968	indx	17	C	T	T	-	-	-	C	C	C	T	C	-	-	-	-	A	A	G	C	T	T	-	A	-	G	G	C	T	T
IRIS_313-11773	0	NA	NA	0	T	T/T	0	A	0	T	1	NA	A	NA	C	AUS 78-125::IRGC 69464-1::[IRIS 313-11773]	IRIS 313-11773	IRGC 132275	ind3	27	C	T	T	-	-	-	C	C	C	T	C	-	-	-	-	A	A	G	C	T	T	-	A	-	G	G	C	T	T
IRIS_313-10067	0	C	NA	0	T	T/T	0	G	0	C	NA	NA	G	NA	A	JEONBUKGUNGWEONNA::IRGC 73055-1::[IRIS 313-10067]	IRIS 313-10067	IRGC 125783	trop	1	C	T	T	-	-	-	C	C	C	T	C	-	-	-	-	C	-	G	C	T	T	-	A	-	G	G	C	T	T
IRIS_313-11526	0	C	NA	0	T	T/T	0	G	0	C	NA	NA	G	NA	A	FOSSA (GBE)::IRGC 56767-1::[IRIS 313-11526]	IRIS 313-11526	IRGC 128292	trop	1	C	T	T	-	-	-	C	C	C	T	C	-	-	-	-	C	-	G	C	T	T	-	A	-	G	G	C	T	T
IRIS_313-9682	0	C	NA	1	T	T/T	0	A	0	T	1	NA	A	NA	C	TK RED 35-799::IRGC 38535-1::[IRIS 313-9682]	IRIS 313-9682	IRGC 135548	aro	24	C	T	T	-	-	-	C	C	C	T	C	-	-	-	-	A	A	G	C	T	T	-	A	-	G	G	C	T	T
IRIS_313-11251	0	T	1	NA	C	NA	0	G	0	C	NA	NA	G	NA	A	IR 4500-5-1-1::IRGC 40552-2::[IRIS 313-11251]	IRIS 313-11251	IRGC 132340	ind1B	108.5	C	T	T	-	-	-	C	C	C	T	T	T	A	G	A	C	-	G	C	T	C	C	C	C	G	G	C	T	C
IRIS_313-11427	0	C	NA	NA	T	NA	0.2	G	0	C	NA	NA	G	NA	A	GEM OU BRAZIL::IRGC 50470-1::[IRIS 313-11427]	IRIS 313-11427	IRGC 128295	trop	14	C	T	T	-	-	-	C	C	C	T	C	-	-	-	-	C	-	G	C	T	T	-	A	-	G	G	C	T	T
IRIS_313-11575	1	NA	NA	1	NA	NA	0.3	A	0		NA	NA	A	NA	A	HONG PI NUO::IRGC 59638-1::[IRIS 313-11575]	IRIS 313-11575	IRGC 127415	temp	109
IRIS_313-11065	NA	C	NA	NA	NA	NA	0.3	G	0	C	NA	NA	G	NA	A	BORO 394::IRGC 29297-2::[IRIS 313-11065]	IRIS 313-11065	IRGC 132326	aus	9	C	T	T	-	-	-	C	C	C	T	C	-	-	-	-	C	-	G	C	T	T	-	A	-	G	G	C	T	T
IRIS_313-11124	1	C	NA	0	T	T/T	0.9	G/A	0	C	NA	NA	G/A	NA	A	BAZAIL 980::IRGC 32817-2::[IRIS 313-11124]	IRIS 313-11124	IRGC 127991	admix	4.5	C	T	T	-	-	-	C	C	C	T	C	-	-	-	-	C	-	G	C	T	T	-	A	-	G	G	C	T	T
IRIS_313-10099	0	C	NA	0	T	T/T	1	G	0	C	NA	NA	G	NA	A	MANONGAZATO::IRGC 77876-1::[IRIS 313-10099]	IRIS 313-10099	IRGC 126303	trop	1	C	T	T	-	-	-	C	C	C	T	C	-	-	-	-	C	-	G	C	T	T	-	A	-	G	G	C	T	T
IRIS_313-10507	0	C	NA	NA	T	NA	1	G	0	C	NA	NA	G	NA	A	HSIANG TSENF TAO::IRGC 5008-1::[IRIS 313-10507]	IRIS 313-10507	IRGC 128311	trop	1	C	T	T	-	-	-	C	C	C	T	C	-	-	-	-	C	-	G	C	T	T	-	A	-	G	G	C	T	T
IRIS_313-11482	0	C	NA	0	T	T/T	1.2	G	0	C	NA	NA	G	NA	A	BONGEZA::IRGC 53483-1::[IRIS 313-11482]	IRIS 313-11482	IRGC 127234	aus	4	C	T	T	-	-	-	C	C	C	T	C	-	-	-	-	C	-	G	C	T	T	-	A	-	G	G	C	T	T
IRIS_313-11882	NA	NA	NA	0	T	T/T	1.2	A	0	T	1	NA	A	NA	C	MAN TIAN QING::IRGC 72776-1::[IRIS 313-11882]	IRIS 313-11882	IRGC 127605	ind1A	29	C	T	T	-	-	-	C	C	C	T	C	-	-	-	-	A	A	G	C	T	T	-	A	-	G	G	C	T	T
IRIS_313-10511	1	NA	NA	1	T	T/T	1.2	A	0	T	1	NA	A	NA	C	MACAN SAPAC::IRGC 5212-2::[IRIS 313-10511]	IRIS 313-10511	IRGC 128101	ind3	37	C	T	T	-	-	-	C	C	C	T	C	-	-	-	-	A	A	G	C	T	T	-	A	-	G	G	C	T	T
IRIS_313-11242	0	C	NA	1	T	T/T	1.4	G/A	0	C/T	NA	NA	G/A	NA	A/C	OR 117-8::IRGC 39680-2::[IRIS 313-11242]	IRIS 313-11242	IRGC 128121	ind2	25	C	T	T	-	-	-	C	C	C	T	C	-	-	-	-	A	A	G	C	T	T	-	A	-	G	G	C	T	T
IRIS_313-12033	1	NA	NA	1	T	T/T	1.5	A	0	T	1	NA	A	NA	C	GAO JIAO HONG::IRGC 80920-1::[IRIS 313-12033]	IRIS 313-12033	IRGC 127377	ind1A	29	C	T	T	-	-	-	C	C	C	T	C	-	-	-	-	A	A	G	C	T	T	-	A	-	G	G	C	T	T
IRIS_313-10869	NA	NA	NA	0	T	T/T	1.55556	G	0	C	NA	NA	G	NA	A	ARC 11751::IRGC 21614-1::[IRIS 313-10869]	IRIS 313-10869	IRGC 127138	aus	5	C	T	T	-	-	-	C	C	C	T	C	-	-	-	-	C	-	G	C	T	T	-	A	-	G	G	C	T	T
IRIS_313-9389	1	C	NA	NA	T	NA	1.7	G	0	C	NA	NA	G	NA	A	KINANDANG BUSIKSIK::IRGC 74607-1::[IRIS 313-9389]	IRIS 313-9389	IRGC 126982	trop	0	C	T	T	-	-	-	C	C	C	T	C	-	-	-	-	C	-	G	C	T			A	-	G	G	C	T	T
IRIS_313-7773	0	C/T	NA	NA	T	NA	1.77778	A	0	T	1	NA	A	NA	C	SEBERANG MR 77::C1::[IRIS 313-7773]	IRIS 313-7773	IRGC 124421	ind1B	20	C	T	T	-	-	-	C	C	C	T	C	-	-	-	-	C	-	G	C	T	T	-	A	-	G	G	C	T	T
IRIS_313-11862	1	C	NA	1	T	T/T	1.88889	A	0	T	1	NA	A	NA	C	HENG YE ZAO::IRGC 72092-1::[IRIS 313-11862]	IRIS 313-11862	IRGC 127406	ind1A	7	C	T	T	-	-	-	C	C	C	T	C	-	-	-	-	A	A	G	C	T	T	-	A	-	G	G	C	T	T
IRIS_313-11724	1	C	NA	0	T	T/T	2	A	0	T	1	NA	A	NA	C	KONYAN::IRGC 66931-1::[IRIS 313-11724]	IRIS 313-11724	IRGC 127531	ind3	37	C	T	T	-	-	-	C	C	C	T	C	-	-	-	-	A	A	G	C	T	T	-	A	-	G	G	C	T	T
IRIS_313-10834	NA	C	NA	0	T	T/T	2	G	0	C	NA	NA	G	NA	A	IARI 11387::IRGC 19573-1::[IRIS 313-10834]	IRIS 313-10834	IRGC 128314	subtrop	1	C	T	T	-	-	-	C	C	C	T	C	-	-	-	-	C	-	G	C	T	T	-	A	-	G	G	C	T	T
IRIS_313-10968	1	C	NA	1	T	T/T	2	A	0	T	1	NA	A	NA	C	IH PEN SHIM MING::IRGC 26067-1::[IRIS 313-10968]	IRIS 313-10968	IRGC 127428	ind1A	27	C	T	T	-	-	-	C	C	C	T	C	-	-	-	-	A	A	G	C	T	T	-	A	-	G	G	C	T	T
IRIS_313-11876	1	NA	NA	1	T	T/T	2	G	0	C	NA	NA	G	NA	A	AI DA::IRGC 72567-1::[IRIS 313-11876]	IRIS 313-11876	IRGC 127113	ind1A	5	C	T	T	-	-	-	C	C	C	T	C	-	-	-	-	C	-	G	C	T	T	-	A	-	G	G	C	T	T
IRIS_313-11734	1	C	NA	NA	T	NA	2	A	0	T	1	NA	A	NA	C	SI CHAO 1::IRGC 67335-1::[IRIS 313-11734]	IRIS 313-11734	IRGC 127803	ind1A	29	C	T	T	-	-	-	C	C	C	T	C	-	-	-	-	A	A	G	C	T	T	-	A	-	G	G	C	T	T
IRIS_313-10314	0	T	1	0	C	1	2.1	G	0		NA	NA	G	NA	A	INIAP 10::IRGC 117000-1::[IRIS 313-10314]	IRIS 313-10314	IRGC 125969	indx	92	C	T	T	-	-	-	C	C	C	T	C	-	-	-	-	C	-	G	C	T	T	-	A	-	G	G	C	T	C
IRIS_313-12237	1	C	NA	0	T	T/T	2.2	A	0	T	1	NA	A	NA	C	WUGU::IRGC 93479-1::[IRIS 313-12237]	IRIS 313-12237	IRGC 127893	ind1A	21	C	T	T	-	-	-	C	C	C	T	C	-	-	-	-	A	A	G	C	T	T	-	A	-	G	G	C	T	T
IRIS_313-11267	1	C	NA	NA	T	NA	2.3	A	0	T	1	NA	A	NA	C	ARC 14358::IRGC 41523-2::[IRIS 313-11267]	IRIS 313-11267	IRGC 127956	ind2	29	C	T	T	-	-	-	C	C	C	T	C	-	-	-	-	A	A	G	C	T	T	-	A	-	G	G	C	T	T
IRIS_313-12151	NA	NA	NA	1	T	T/T	2.5	A	0	T	1	NA	A	NA	C	DAMNOEUB KRACHAK SESS::IRGC 87380-1::[IRIS 313-12151]	IRIS 313-12151	IRGC 132279	ind3	21	C	T	T	-	-	-	C	C	C	T	C	-	-	-	-	A	A	G	C	T	T	-	A	-	G	G	C	T	T
IRIS_313-11123	1	C	NA	0	T	T/T	2.6	G	0	C	NA	NA	G	NA	A	BAZAIL 975::IRGC 32816-2::[IRIS 313-11123]	IRIS 313-11123	IRGC 127990	aus	4	C	T	T	-	-	-	C	C	C	T	C	-	-	-	-	C	-	G	C	T	T	-	A	-	G	G	C	T	T
IRIS_313-11249	0	C/T	NA	1	T/C	T/C	2.6	G/A	0	T	1	NA	G/A	NA	A/C	IR 4535-PP 23-6-8-1::IRGC 40402-2::[IRIS 313-11249]	IRIS 313-11249	IRGC 132341	indx	36	C	T	T	-	-	-	C	C	C	T	C	-	-	-	-	C	-	G	C	T	T	-	A	-	G	G	C	T
IRIS_313-11572	0	C	NA	1	T	T/T	2.9	A	0	T	1	NA	A	NA	C	BAI MI TIE QIU::IRGC 59414-1::[IRIS 313-11572]	IRIS 313-11572	IRGC 127201	ind1A	23	C	T	T	-	-	-	C	C	C	T	C	-	-	-	-	A	A	G	C	T	T	-	A	-	G	G	C	T	T
IRIS_313-9209	1	C	NA	1	T	T/T	2.9	A	0	T	1	NA	A	NA	C	LEUANG LAI MAE PRAJAN::IRGC 71279-1::[IRIS 313-9209]	IRIS 313-9209	IRGC 126984	ind3	13	C	T	T	-	-	-	C	C	C	T	C	-	-	-	-	C	-	G	C	T	T	-	A	-	G	G	C	T	T
IRIS_313-11225	0	C	NA	1	T	T/T	3	A	0	T	1	NA	A	NA	C	SADAJIRA (DEEP STRAW) 16-194::IRGC 38251-2::[IRIS 313-11225]	IRIS 313-11225	IRGC 132265	indx	20	C	T	T	-	-	-	C	C	C	T	C	-	-	-	-	A	A	G	C	T	T	-	A	-	G	G	C	T	T
IRIS_313-12057	NA	C	NA	1	T	T/T	3	A	0	T	1	NA	A	NA	C	AI JIAO ZI::IRGC 82255-1::[IRIS 313-12057]	IRIS 313-12057	IRGC 127116	indx	21	C	T	T	-	-	-	C	C	C	T	C	-	-	-	-	A	A	G	C	T	T	-	A	-	G	G	C	T	T
IRIS_313-10967	NA	C	NA	1	T	T/T	3	G	0	C	NA	NA	G	NA	A	IAS 22-8 PALMAR::IRGC 26058-1::[IRIS 313-10967]	IRIS 313-10967	IRGC 128315	temp	0	C	T	T	-	-	-	C	C	C	T	C	-	-	-	-	C	-	G	C	T	T	-	A	-	G	G	C	T	T
IRIS_313-11802	1	C	NA	1	T	T/T	3.1	A	0	T	1	NA	A	NA	C	JIE CAO ZHAN::IRGC 70305-1::[IRIS 313-11802]	IRIS 313-11802	IRGC 127460	ind1A	37	C	T	T	-	-	-	C	C	C	T	C	-	-	-	-	A	A	G	C	T	T	-	A	-	G	G	C	T	T
IRIS_313-11684	1	NA	NA	1	T	T/T	3.2	A	0	T	1	NA	A	NA	C	OB CHUEY::IRGC 64568-1::[IRIS 313-11684]	IRIS 313-11684	IRGC 132021	ind3	29	C	T	T	-	-	-	C	C	C	T	C	-	-	-	-	A	A	G	C	T	T	-	A	-	G	G	C	T	T
IRIS_313-10844	NA	C	NA	1	T	T/T	3.2	A	0	T	1	NA	A	NA	C	INDO NO 7505::IRGC 20162-2::[IRIS 313-10844]	IRIS 313-10844	IRGC 128058	ind3	26	C	T	T	-	-	-	C	C	C	T	C	-	-	-	-	C	-	G	C	T	T	-	A	-	G	G	C	T	T
IRIS_313-9568	0	C	NA	NA	T	NA	3.4	G	0	C	NA	NA	G	NA	A	PAMPANGON (H)::IRGC 60392-1::[IRIS 313-9568]	IRIS 313-9568	IRGC 126346	trop	1	C	T	T	-	-	-	C	C	C	T	C	-	-	-	-	C	-	G	C	T	T	-	A	-	G	G	C	T	T
IRIS_313-11966	1	NA	NA	1	T	T/T	3.6	A	0	T	1	NA	A	NA	C	QI GU::IRGC 77381-1::[IRIS 313-11966]	IRIS 313-11966	IRGC 127752	ind1A	27	C	T	T	-	-	-	C	C	C	T	C	-	-	-	-	A	A	G	C	T	T	-	A	-	G	G	C	T	T
IRIS_313-10620	0	C	NA	NA	T	NA	3.6	G	0	C	NA	NA	G	NA	A	R 27::IRGC 9498-1::[IRIS 313-10620]	IRIS 313-10620	IRGC 128443	trop	0	C	T	T	-	-	-	C	C	C	T	C	-	-	-	-	C	-	G	C	T	T	-	A	-	G	G	C	T	T
IRIS_313-11250	0	C	NA	0	T	T/T	3.7	A	0	T	1	NA	A	NA	C	IR 9560-2-6-3::IRGC 40451-1::[IRIS 313-11250]	IRIS 313-11250	IRGC 127441	ind1B	16	C	T	T	-	-	-	C	C	C	T	C	-	-	-	-	C	-	G	C	T	T	-	A	-	G	G	C	T	T
IRIS_313-10929	1	C	NA	1	T	T/T	3.7	A	0	T	1	NA	A	NA	C	KOLONGI BAO::IRGC 24135-2::[IRIS 313-10929]	IRIS 313-10929	IRGC 128090	ind2	23	C	T	T	-	-	-	C	C	C	T	C	-	-	-	-	A	A	G	C	T	T	-	A	-	G	G	C	T	T
IRIS_313-11401	NA	C	NA	1	T	T/T	3.9	G	0	C	NA	NA	G	NA	A	MOTANGA::IRGC 49242-2::[IRIS 313-11401]	IRIS 313-11401	IRGC 128113	aro	2	C	T	T	-	-	-	C	C	C	T	C	-	-	-	-	C	-	G	C	T	T	-	A	-	G	G	C	T	T
IRIS_313-9891	0	C	NA	1	T	T/T	4	G	0	C	NA	NA	G	NA	A	YONG AN HUK::IRGC 19891-1::[IRIS 313-9891]	IRIS 313-9891	IRGC 125945	temp	0	C	T	T	-	-	-	C	C	C	T	C	-	-	-	-	C	-	G	C	T	T	-	A	-	G	G	C	T	T
IRIS_313-10154	1	C	NA	1	T	T/T	4	A	0	T	1	NA	A	NA	C	HE GU TSAO::IRGC 51302-1::[IRIS 313-10154]	IRIS 313-10154	IRGC 125760	ind1A	26	C	T	T	-	-	-	C	C	C	T	C	-	-	-	-	C	-	G	C	T	T	-	A	-	G	G	C	T	T
IRIS_313-11191	1	C	NA	1	T	T/T	4	G	0	C	NA	NA	G	NA	A	RANRUWAN::IRGC 36360-1::[IRIS 313-11191]	IRIS 313-11191	IRGC 127763	aus	6	C	T	T	-	-	-	C	C	C	T	C	-	-	-	-	C	-	G	C	T	T	-	A	-	G	G	C	T	T
IRIS_313-10298	1	C	NA	1	T	T/T	4.2	A	0	T	1	NA	A	NA	C	3210::IRGC 116950-1::[IRIS 313-10298]	IRIS 313-10298	IRGC 127030	ind1B	18	C	T	T	-	-	-	C	C	C	T	C	-	-	-	-	A	A	G	C	T	T	-	A	-	G	G	C	T	T
IRIS_313-11571	NA	C	NA	NA	T	NA	4.375	G	0	C	NA	NA	G	NA	A	BAI MANG AI ZHONG::IRGC 59408-1::[IRIS 313-11571]	IRIS 313-11571	IRGC 128235	temp	0	C	T	T	-	-	-	C	C	C	T	C	-	-	-	-	C	-	G	C	T	T	-	A	-	G	G	C	T	T
IRIS_313-9176	0	C	NA	1	T	T/T	4.8	G	0	C	NA	NA	G	NA	A	ARC 11359::IRGC 21348-1::[IRIS 313-9176]	IRIS 313-9176	IRGC 125639	japx	2	C	T	T	-	-	-	C	C	C	T	C	-	-	-	-	C	-	G	C	T	T	-	A	-	G	G	C	T	T
IRIS_313-11324	0	T	1	0	C	1	5	G	0		NA	NA	G	NA	A	KALABOKRI::IRGC 43872-1::[IRIS 313-11324]	IRIS 313-11324	IRGC 127477	aus	93	C	T	C	C	C	C	C	C	C	T	T	T	A	G	A	C	-	G	C	T	T	-	A	-	G	G	C	T	C
IRIS_313-10999	0	C	NA	0	T	T/T	5	G	0	C	NA	NA	G	NA	A	LANDEO::IRGC 27164-1::[IRIS 313-10999]	IRIS 313-10999	IRGC 127550	trop	0	C	T	T	-	-	-	C	C	C	T	C	-	-	-	-	C	-	G	C	T	T	-	A	-	G	G	C	T	T
IRIS_313-11805	1	C	NA	1	T	T/T	5	A	0	T	1	NA	A	NA	C	XI HONG GU::IRGC 70416-1::[IRIS 313-11805]	IRIS 313-11805	IRGC 127895	ind1A	29	C	T	T	-	-	-	C	C	C	T	C	-	-	-	-	A	A	G	C	T	T	-	A	-	G	G	C	T	T
IRIS_313-11536	1	C	NA	1	NA	NA	5	G	0	C	NA	NA	G	NA	A	WIR 2091::IRGC 57536-1::[IRIS 313-11536]	IRIS 313-11536	IRGC 128502	temp	1	C	T	T	-	-	-	C	C	C	T	C	-	-	-	-	C	-	G	C	T	T	-	A	-	G	G	C	T	T
IRIS_313-10516	NA	C	NA	1	T	T/T	5	A	0	T	1	NA	A	NA	C	O. SATIVA::IRGC 5779-1::[IRIS 313-10516]	IRIS 313-10516	IRGC 127689	indx	19	C	T	T	-	-	-	C	C	C	T	C	-	-	-	-	A	A	G	C	T	T	-	A	-	G	G	C	T	T
IRIS_313-9974	NA	C	NA	1	T	T/T	5	G	0	C	NA	NA	G	NA	A	HEUKSANJO::IRGC 55536-1::[IRIS 313-9974]	IRIS 313-9974	IRGC 125761	temp	1	C	T	T	-	-	-	C	C	C	T	C	-	-	-	-	C	-	G	C	T	T	-	A	-	G	G	C	T	T
IRIS_313-9050	0	C	NA	NA	T	NA	5	G	0	C	NA	NA	G	NA	A	ANGKARONG::IRGC 71493-1::[IRIS 313-9050]	IRIS 313-9050	IRGC 127070	trop	2	C	T	T	-	-	-	C	C	C	T	C	-	-	-	-	C	-	G	C	T	T	-	A	-	G	G	C	T	T
IRIS_313-11877	1	NA	NA	NA	T	NA	5	A	0	T	1	NA	A	NA	C	AN NAN ZAO::IRGC 72576-1::[IRIS 313-11877]	IRIS 313-11877	IRGC 127125	ind1A	23	C	T	T	-	-	-	C	C	C	T	C	-	-	-	-	A	A	G	C	T	T	-	A	-	G	G	C	T	T
IRIS_313-11803	1	C	NA	NA	T	NA	5	G	0	C	NA	NA	G	NA	A	MAO ZHA NUO::IRGC 70335-1::[IRIS 313-11803]	IRIS 313-11803	IRGC 127608	temp	0	C	T	T	-	-	-	C	C	C	T	C	-	-	-	-	C	-	G	C	T	T	-	A	-	G	G	C	T	T
IRIS_313-11329	0	C	NA	NA	T	NA	NA	G	0	C	NA	NA	G	NA	A	PADI JALAI BELA::IRGC 44084-1::[IRIS 313-11329]	IRIS 313-11329	IRGC 127701	trop	1	C	T	T	-	-	-	C	C	C	T	C	-	-	-	-	C	-	G	C	T	T	-	A	-	G	G	C	T	T
IRIS_313-8048	NA	C	NA	NA	T	NA	NA	G	0	C	NA	NA	G	NA	A	RONCOLO::GERVEX 124-C1::[IRIS 313-8048]	IRIS 313-8048	IRGC 122221	japx	0	C	T	T	-	-	-	C	C	C	T	C	-	-	-	-	C	-	G	C	T	T	-	A	-	G	G	C	T	T
IRIS_313-10754	NA	C	NA	0	T	T/T	0.333333	G	1	C	NA	NA	G	NA	A	KH 998::IRGC 16948-2::[IRIS 313-10754]	IRIS 313-10754	IRGC 128081	indx	5	C	T	T	-	-	-	C	C	C	T	C	-	-	-	-	C	-	G	C	T	T	-	A	-	G	G	C	T	T
IRIS_313-10996	0	T	1	0	C	1	1.9	G	1	C	NA	NA	G	NA	A	BAKASI::IRGC 27074-1::[IRIS 313-10996]	IRIS 313-10996	IRGC 127204	indx	62.5	C	T	T	-	-	-	C	C	C	T	C	-	-	-	-			G	C	T	T	-	A	-	G	G	C	T	C
IRIS_313-11300	NA	C	NA	0	T	T/T	2	G	1	C	NA	NA	G	NA	C	ARC 14709::IRGC 42976-2::[IRIS 313-11300]	IRIS 313-11300	IRGC 127960	ind2	15	C	T	T	-	-	-	C	C	C	T	C	-	-	-	-	A	A	G	C	T	T	-	A	-	G	G	C	T	T
IRIS_313-11790	NA	C	NA	0	T	T/T	2	G	1	C	NA	NA	G	NA	A	VARIRANGAHY::IRGC 69897-1::[IRIS 313-11790]	IRIS 313-11790	IRGC 127883	trop	0	C	T	T	-	-	-	C	C	C	T	C	-	-	-	-	C	-	G	C	T	T	-	A	-	G	G	C	T	T
IRIS_313-11812	1	NA	NA	0	T	T/T	4	G	1	C	NA	NA	G	NA	A	ASFALA::IRGC 70650-1::[IRIS 313-11812]	IRIS 313-11812	IRGC 127175	ind3	24	C	T	T	-	-	-	C	C	C	T	C	-	-	-	-	A	A	G	C	T	T	-	A	-	G	G	C	T	T
IRIS_313-9602	1	C/T	NA	NA	T	NA	4	G	1	C	NA	NA	G	NA	A	HTA 22::IRGC 45827-1::[IRIS 313-9602]	IRIS 313-9602	IRGC 125765	indx	5	C	T	T	-	-	-	C	C	C	T	C	-	-	-	-	C	-	G	C	T	T	-	A	-	G	G	C	T	T
IRIS_313-11237	0	T	1	0	C	1	5	G	1	C	NA	NA	G	NA	A	TAICHUNG SEN YU 214::IRGC 38899-1::[IRIS 313-11237]	IRIS 313-11237	IRGC 127835	ind1B	56	C	T	T	-	-	-	C	C	C	T	C	-	-	-	-	A	A	G	C	T	T	-	A	-	G	G	C	T	C
IRIS_313-11454	NA	T	NA	0	C	1	5	G	1		NA	NA	G	NA	A	BARI SUTAR::IRGC 52410-1::[IRIS 313-11454]	IRIS 313-11454	IRGC 127211	aus	73	C	T	T	-	-	-	C	C	C	T	C	-	-	-	-	A	A	G	C	T	T	-	A	-	G	G	C	T	C
IRIS_313-8387	0	C	NA	1	T	T/T	5	G	1	C	NA	NA	G	NA	A	FU LI HONG::IRGC 70250-1::[IRIS 313-8387]	IRIS 313-8387	IRGC 125610	temp	0	C	T	T	-	-	-	C	C	C	T	C	-	-	-	-	C	-	G	C	T	T	-	A	-	G	G	C	T	T
IRIS_313-10097	1	C	NA	1	T	T/T	5	G	1	C	NA	NA	G	NA	A	MAEKJO::IRGC 77666-1::[IRIS 313-10097]	IRIS 313-10097	IRGC 125830	temp	1	C	T	T	-	-	-	C	C	C	T	C	-	-	-	-	C	-	G	C	T	T	-	A	-	G	G	C	T	T
IRIS_313-11171	1	C	NA	1	T	T/T	5	G	1	C	NA	NA	G	NA	A	M 142::IRGC 35054-1::[IRIS 313-11171]	IRIS 313-11171	IRGC 127583	aus	6	C	T	T	-	-	-	C	C	C	T	C	-	-	-	-	C	-	G	C	T	T	-	A	-	G	G	C	T	T
IRIS_313-11653	1	C	NA	1	T	T/T	5	G	1	C	NA	NA	G	NA	A	MA SHE 8::IRGC 62750-1::[IRIS 313-11653]	IRIS 313-11653	IRGC 128384	temp	1	C	T	T	-	-	-	C	C	C	T	C	-	-	-	-	C	-	G	C	T	T	-	A	-	G	G	C	T	T
IRIS_313-11037	NA	C/T	NA	1	T	T/T	5	G	1	C	NA	NA	G	NA	A	421::IRGC 28458-1::[IRIS 313-11037]	IRIS 313-11037	IRGC 128211	aus	4	C	T	T	-	-	-	C	C	C	T	C	-	-	-	-	C	-	G	C	T	T	-	A	-	G	G	C	T	T
IRIS_313-10840	NA	C	NA	1	T	T/T	5	G	1	C	NA	NA	G	NA	A	YE ZO::IRGC 19888-1::[IRIS 313-10840]	IRIS 313-10840	IRGC 128507	temp	1	C	T	T	-	-	-	C	C	C	T	C	-	-	-	-	C	-	G	C	T	T	-	A	-	G	G	C	T	T
IRIS_313-9964	NA	C	NA	1	T	T/T	5	G	1	C	NA	NA	G	NA	A	WIR 1951::IRGC 51643-1::[IRIS 313-9964]	IRIS 313-9964	IRGC 125938	temp	1	C	T	T	-	-	-	C	C	C	T	C	-	-	-	-	C	-	G	C	T	T	-	A	-	G	G	C	T	T
IRIS_313-11344	0	T	1	NA	T	NA	5	G	1	C	NA	NA	G	NA	A	SAMON::IRGC 44735-2::[IRIS 313-11344]	IRIS 313-11344	IRGC 128157	ind3	3	C	T	T	-	-	-	C	C	C	T	C	-	-	-	-	C	-	G	C	T	T	-	A	-	G	G	C	T	T
IRIS_313-9890	1	C	NA	NA	T	NA	5	G	1	C	NA	NA	G	NA	A	WA BANG::IRGC 19880-1::[IRIS 313-9890]	IRIS 313-9890	IRGC 125934	temp	0	C	T	T	-	-	-	C	C	C	T	C	-	-	-	-	C	-	G	C	T	T	-	A	-	G	G	C	T	T
IRIS_313-10642	NA	C	NA	NA	T	NA	5	G	1	C	NA	NA	G	NA	A	SACHIKAZE::IRGC 10891-1::[IRIS 313-10642]	IRIS 313-10642	IRGC 128455	temp	0	C	T	T	-	-	-	C	C	C	T	C	-	-	-	-	C	-	G	C	T	T	-	A	-	G	G	C	T	T
IRIS_313-10617	1	NA	NA	1	NA	NA	NA	G	1	C	NA	NA	G	NA	A	KARA SHALI::IRGC 9293-1::[IRIS 313-10617]	IRIS 313-10617	IRGC 131998	temp	122
IRIS_313-11654	NA	C	NA	1	T	T/T	0.857143	G	NA	C	NA	NA	G	NA	A	PL 3165::IRGC 62827-1::[IRIS 313-11654]	IRIS 313-11654	IRGC 128434	temp	1	C	T	T	-	-	-	C	C	C	T	C	-	-	-	-	C	-	G	C	T	T	-	A	-	G	G	C	T	T
IRIS_313-11820	0	T	1	0	C	1	1	G	NA	C	NA	NA	G	NA	A	PAKISTANHMWE::IRGC 70763-1::[IRIS 313-11820]	IRIS 313-11820	IRGC 127709	ind3	143	C	T	C	C	C	C	C	C	C	T	T	T	A	G	A	A	A	G	C	T	T	-	C	C	G	G	C	T	C
IRIS_313-11626	1	C	NA	1	T	T/T	2	G	NA	C	NA	NA	G	NA	A	GUDURA::IRGC 61955-1::[IRIS 313-11626]	IRIS 313-11626	IRGC 127395	aro	24	C	T	T	-	-	-	C	C	C	T	C	-	-	-	-	A	A	G	C	T	T	-	A	-	G	G	C	T	T
IRIS_313-10951	0	T	1	0	C	1	2.11111	G	NA	C	NA	NA	G	NA	A	JENDA ABANG::IRGC 25413-2::[IRIS 313-10951]	IRIS 313-10951	IRGC 128062	ind3	84	C	T	T	-	-	-	C	C	C	T	C	-	-	-	-	C	-	G	C	T	T	-	A	-	G	G	C	T	C
IRIS_313-9251	1	T	0	0	C	1	2.6	G	NA	C	NA	NA	G	NA	A	JANDA LAOR::IRGC 48552-1::[IRIS 313-9251]	IRIS 313-9251	IRGC 126980	ind3	65	C	T	T	-	-	-	C	C	C	T	C	-	-	-	-	C	-	G	C	T	T	-	A	-	G	G	C	T	C
IRIS_313-7820	0	T	1	0	C	1	3	G	NA	C	NA	NA	G	NA	A	WAS 206-B-B-2-2-1::C1::[IRIS 313-7820]	IRIS 313-7820	IRGC 122290	ind1B	95	C	T	T	-	-	-	C	C	C	T	C	-	-	-	-	C	-	G	C	T	T	-	C	C	G	G	C	T	C
IRIS_313-11582	1	NA	NA	1	NA	NA	3	A	NA	C	NA	NA	A	NA	A	WAN GENG BAI DAO TOU::IRGC 59948-1::[IRIS 313-11582]	IRIS 313-11582	IRGC 128499	temp	96.5
IRIS_313-11352	1	NA	NA	1	T/C	T/C	3.66667	NA	NA	C	NA	NA	NA	NA	A	BUCHI::IRGC 45237-2::[IRIS 313-11352]	IRIS 313-11352	IRGC 128004	aro	4	C	T	T	-	-	-	C	C	C	T	C	-	-	-	-	C	-	G	C	T	T	-	A	-	G	G	C	T	T
IRIS_313-11744	1	NA	NA	1	T	T/T	5	G	NA	C	NA	NA	G	NA	A	AI JIAO AO FAN ZI::IRGC 67871-1::[IRIS 313-11744]	IRIS 313-11744	IRGC 127114	indx	24	C	T	T	-	-	-	C	C	C	T	C	-	-	-	-	A	A	G	C	T	T	-	A	-	G	G	C	T	T
IRIS_313-12009	1	C	NA	1	T	T/T	5	G/A	NA	C/T	NA	NA	G/A	NA	A/C	PO HE::IRGC 79701-1::[IRIS 313-12009]	IRIS 313-12009	IRGC 127736	ind1A	3.5	C	T	T	-	-	-	C	C	C	T	C	-	-	-	-	C	-	G	C	T	T	-	A	-	G	G	C	T	T
IRIS_313-10289	NA	C/T	NA	NA	NA	NA	NA	A	NA	T	NA	NA	A	NA	A/C	ARAURE 1::IRGC 116956-1::[IRIS 313-10289]	IRIS 313-10289	IRGC 125950	ind1B	13	C	T	T	-	-	-	C	C	C	T	C	-	-	-	-			G	C	T	T	-	A	-	G	G	C	T
CX388	NA	C	NA	NA	NA	NA	NA	A	NA	T	NA	NA	A	NA	C	KR200::[CX388]	CX388	IRGC 135972	ind1B	20	C	T	T	-	-	-	C	C	C	T	C	-	-	-	-	A	A	G	C	T	T	-	A	-	G	G	C	T	T
IRIS_313-11101	NA	C	NA	NA	NA	NA	NA	A	NA	T	NA	NA	A	NA	C	Y 115::IRGC 30856-2::[IRIS 313-11101]	IRIS 313-11101	IRGC 128202	indx	24	C	T	T	-	-	-	C	C	C	T	C	-	-	-	-	C	-	G	C	T	T	-	A	-	G	G	C	T	T
IRIS_313-8268	NA	C	NA	NA	NA	NA	NA	A	NA	T	NA	NA	A	NA	C	CHHOTE DHAN::[IRIS 313-8268]	IRIS 313-8268	IRGC 117446	aro	19	C	T	T	-	-	-	C	C	C	T	C	-	-	-	-	A	A	G	C	T	T	-	A	-	G	G	C	T	T
B021	NA	NA	NA	NA	T	NA	NA	A	NA	T	NA	NA	A	NA	C	SELN 244A6-20::[B021]	B021	IRGC 136044	indx	19	C	T	T	-	-	-	C	C	C	T	C	-	-	-	-	A	A	G	C	T	T	-	A	-	G	G	C	T	T
B030	NA	NA	NA	NA	T	NA	NA	A	NA	T	NA	NA	A	NA	C	JAIBATTEY::[B030]	B030	IRGC 135950	indx	8	C	T	T	-	-	-	C	C	C	T	C	-	-	-	-	C	-	G	C	T	T	-	A	-	G	G	C	T	T
B031	NA	NA	NA	NA	T	NA	NA	A	NA	T	NA	NA	A	NA	C	NGATSIN::[B031]	B031	IRGC 136007	ind2	20	C	T	T	-	-	-	C	C	C	T	C	-	-	-	-	A	A	G	C	T	T	-	A	-	G	G	C	T	T
B058	NA	NA	NA	NA	T	NA	NA	A	NA	T	NA	NA	A	NA	C	ERJIUNAN 1::[B058]	B058		ind1B	7.5	C	T	T	-	-	-	C	C	C	T	C	-	-	-	-	A	A	G	C	T	T	-	A	-	G	G	C	T	T
B120	NA	NA	NA	NA	T	NA	NA	A	NA	T	NA	NA	A	NA	C	HONGWAN 1::[B120]	B120		indx	9	C	T	T	-	-	-	C	C	C	T	C	-	-	-	-	C	-	G	C	T	T	-	A	-	G	G	C	T	T
B145	NA	NA	NA	NA	T	NA	NA	A	NA	T	NA	NA	A	NA	C	TEQINGXUANHUI::[B145]	B145		indx	8	C	T	T	-	-	-	C	C	C	T	C	-	-	-	-	C	-	G	C	T	T	-	A	-	G	G	C	T	T
B147	NA	NA	NA	NA	T	NA	NA	A	NA	T	NA	NA	A	NA	C	BAIKEHANHE::[B147]	B147		ind1A	20	C	T	T	-	-	-	C	C	C	T	C	-	-	-	-	A	A	G	C	T	T	-	A	-	G	G	C	T	T
B198	NA	NA	NA	NA	T	NA	NA	A	NA	T	NA	NA	A	NA	C	JIEFANGXIAN::[B198]	B198		ind1A	14	C	T	T	-	-	-	C	C	C	T	C	-	-	-	-	A	A	G	C	T	T	-	A	-	G	G	C	T	T
B213	NA	NA	NA	NA	T	NA	NA	A	NA	T	NA	NA	A	NA	C	LIUYENIAN::[B213]	B213		ind1A	18	C	T	T	-	-	-	C	C	C	T	C	-	-	-	-	A	A	G	C	T	T	-	A	-	G	G	C	T	T
CX161	NA	NA	NA	NA	T	NA	NA	A	NA	T	NA	NA	A	NA	C	IR42::[CX161]	CX161	IRGC 135920	ind1B	21	C	T	T	-	-	-	C	C	C	T	C	-	-	-	-	A	A	G	C	T	T	-	A	-	G	G	C	T	T
CX247	NA	NA	NA	NA	T	NA	NA	A	NA	T	NA	NA	A	NA	C	IRAT144::[CX247]	CX247	IRGC 135942	indx	12	C	T	T	-	-	-	C	C	C	T	C	-	-	-	-	C	-	G	C	T	T	-	A	-	G	G	C	T	T
CX250	NA	NA	NA	NA	T	NA	NA	A	NA	T	NA	NA	A	NA	C	829::[CX250]	CX250	IRGC 135820	ind1B	24	C	T	T	-	-	-	C	C	C	T	C	-	-	-	-	A	A	G	C	T	T	-	A	-	G	G	C	T	T
CX31	NA	NA	NA	NA	T	NA	NA	A	NA	T	NA	NA	A	NA	C	HNANKAR::[CX31]	CX31	IRGC 135903	ind1B	25	C	T	T	-	-	-	C	C	C	T	C	-	-	-	-	A	A	G	C	T	T	-	A	-	G	G	C	T	T
CX358	NA	NA	NA	NA	T	NA	NA	A	NA	T	NA	NA	A	NA	C	PSBRC82::[CX358]	CX358	IRGC 136024	ind1B	19	C	T	T	-	-	-	C	C	C	T	C	-	-	-	-	A	A	G	C	T	T	-	A	-	G	G	C	T	T
CX37	NA	NA	NA	NA	T	NA	NA	A	NA	T	NA	NA	A	NA	C	OM997::[CX37]	CX37	IRGC 136015	ind1B	13	C	T	T	-	-	-	C	C	C	T	C	-	-	-	-	A	A	G	C	T	T	-	A	-	G	G	C	T	T
CX387	NA	NA	NA	NA	T	NA	NA	A	NA	T	NA	NA	A	NA	C	1088::[CX387]	CX387	IRGC 135812	ind1B	13	C	T	T	-	-	-	C	C	C	T	C	-	-	-	-	A	A	G	C	T	T	-	A	-	G	G	C	T	T
CX393	NA	NA	NA	NA	T	NA	NA	A	NA	T	NA	NA	A	NA	C	HUANGSIZHAN::[CX393]	CX393		ind1B	14	C	T	T	-	-	-	C	C	C	T	C	-	-	-	-	A	A	G	C	T	T	-	A	-	G	G	C	T	T
CX431	NA	NA	NA	NA	T	NA	NA	A	NA	T	NA	NA	A	NA	C	DUOXI 1::[CX431]	CX431		indx	20	C	T	T	-	-	-	C	C	C	T	C	-	-	-	-	A	A	G	C	T	T	-	A	-	G	G	C	T	T
CX54	NA	NA	NA	NA	T	NA	NA	A	NA	T	NA	NA	A	NA	C	LINYITANGDAO::[CX54]	CX54		indx	11	C	T	T	-	-	-	C	C	C	T	C	-	-	-	-	C	-/A	G	C	T	T	-/A	A	-/A	G	G	C	T	T
IRIS_313-10001	NA	NA	NA	NA	T	NA	NA	A	NA	T	NA	NA	A	NA	C	C 662083::IRGC 62101-1::[IRIS 313-10001]	IRIS 313-10001	IRGC 125692	ind1B	20	C	T	T	-	-	-	C	C	C	T	C	-	-	-	-	A	A	G	C	T	T	-	A	-	G	G	C	T	T
IRIS_313-10016	NA	NA	NA	NA	T	NA	NA	A	NA	T	NA	NA	A	NA	C	BOHOTO BALOOCHESTAN::IRGC 66237-1::[IRIS 313-10016]	IRIS 313-10016	IRGC 125954	indx	12	C	T	T	-	-	-	C	C	C	T	C	-	-	-	-	A	A	G	C	T	T	-	A	-	G	G	C	T	T
IRIS_313-10103	NA	NA	NA	NA	T	NA	NA	A	NA	T	NA	NA	A	NA	C	DALSUNG 41::IRGC 79385-1::[IRIS 313-10103]	IRIS 313-10103	IRGC 125721	indx	16	C	T	T	-	-	-	C	C	C	T	C	-	-	-	-	C	-	G	C	T	T	-	A	-	G	G	C	T	T
IRIS_313-10167	NA	NA	NA	NA	T	NA	NA	A	NA	T	NA	NA	A	NA	C	IR 13429-109-2-2-1::IRGC 63491-1::[IRIS 313-10167]	IRIS 313-10167	IRGC 125773	indx	20	C	T	T	-	-	-	C	C	C	T	C	-	-	-	-	A	A	G	C	T	T	-	A	-	G	G	C	T	T
IRIS_313-10179	NA	NA	NA	NA	T	NA	NA	A	NA	T	NA	NA	A	NA	C	GUI HUA ZAO::IRGC 68060-1::[IRIS 313-10179]	IRIS 313-10179	IRGC 125755	indx	29	C	T	T	-	-	-	C	C	C	T	C	-	-	-	-	A	A	G	C	T	T	-	A	-	G	G	C	T	T
IRIS_313-10220	NA	NA	NA	NA	T	NA	NA	A	NA	T	NA	NA	A	NA	C	EPEAL 102::IRGC 78698-1::[IRIS 313-10220]	IRIS 313-10220	IRGC 126203	indx	23	C	T	T	-	-	-	C	C	C	T	C	-	-	-	-	A	A	G	C	T	T	-	A	-	G	G	C	T	T
IRIS_313-10224	NA	NA	NA	NA	T	NA	NA	A	NA	T	NA	NA	A	NA	C	HUA LI ZAO::IRGC 80950-1::[IRIS 313-10224]	IRIS 313-10224	IRGC 125766	ind1A	9	C	T	T	-	-	-	C	C	C	T	C	-	-	-	-	A	A	G	C	T	T	-	A	-	G	G	C	T	T
IRIS_313-10239	NA	NA	NA	NA	T	NA	NA	A	NA	T	NA	NA	A	NA	C	LIU XU::IRGC 109232-1::[IRIS 313-10239]	IRIS 313-10239	IRGC 125827	indx	21	C	T	T	-	-	-	C	C	C	T	C	-	-	-	-	A	A	G	C	T	T	-	A	-	G	G	C	T	T
IRIS_313-10263	NA	NA	NA	NA	T	NA	NA	A	NA	T	NA	NA	A	NA	C	CUYAMEL 3820::IRGC 116975-1::[IRIS 313-10263]	IRIS 313-10263	IRGC 125961	indx	28	C	T	T	-	-	-	C	C	C	T	C	-	-	-	-	C	-	G	C	T	T	-	A	-	G	G	C	T	T
IRIS_313-10287	NA	NA	NA	NA	T	NA	NA	A	NA	T	NA	NA	A	NA	C	UQUIHUA::IRGC 117037-1::[IRIS 313-10287]	IRIS 313-10287	IRGC 127068	ind1B	20	C	T	T	-	-	-	C	C	C	T	C	-	-	-	-	A	A	G	C	T	T	-	A	-	G	G	C	T	T
IRIS_313-10349	NA	NA	NA	NA	T	NA	NA	A	NA	T	NA	NA	A	NA	C	CSR-90 IR-2::IRGC 117327-1::[IRIS 313-10349]	IRIS 313-10349	IRGC 120921	indx	12	C	T	T	-	-	-	C	C	C	T	C	-	-	-	-	A	A	G	C	T	T	-	A	-	G	G	C	T	T
IRIS_313-10355	NA	NA	NA	NA	T	NA	NA	A	NA	T	NA	NA	A	NA	C	IR 31142-14-1-1-3-1-1-2::IRGC 117378-1::[IRIS 313-10355]	IRIS 313-10355	IRGC 126023	indx	16	C	T	T	-	-	-	C	C	C	T	C	-	-	-	-	C	-	G	C	T	T	-	A	-	G	G	C	T	T
IRIS_313-10359	NA	NA	NA	NA	T	NA	NA	A	NA	T	NA	NA	A	NA	C	IR 53650-2B-10-1-2-1::IRGC 117379-1::[IRIS 313-10359]	IRIS 313-10359	IRGC 125973	indx	15	C	T	T	-	-	-	C	C	C	T	C	-	-	-	-	A	A	G	C	T	T	-	A	-	G	G	C	T	T
IRIS_313-10360	NA	NA	NA	NA	T	NA	NA	A	NA	T	NA	NA	A	NA	C	IR 57514-PMI 5-B-1-2::IRGC 117372-1::[IRIS 313-10360]	IRIS 313-10360	IRGC 126025	indx	11	C	T	T	-	-	-	C	C	C	T	C	-	-	-	-	C	-	G	C	T	T	-	A	-	G	G	C	T	T
IRIS_313-10428	NA	NA	NA	NA	T	NA	NA	A	NA	T	NA	NA	A	NA	C	SERAUP 50::IRGC 14-1::[IRIS 313-10428]	IRIS 313-10428		ind3	19	C	T	T	-	-	-	C	C	C	T	C	-	-	-	-	A	A	G	C	T	T	-	A	-	G	G	C	T	T
IRIS_313-10448	NA	NA	NA	NA	T	NA	NA	A	NA	T	NA	NA	A	NA	C	BINOLAYANGUN::IRGC 791-2::[IRIS 313-10448]	IRIS 313-10448	IRGC 127996	ind3	15	C	T	T	-	-	-	C	C	C	T	C	-	-	-	-	C	-	G	C	T	T	-	A	-	G	G	C	T	T
IRIS_313-10480	NA	NA	NA	NA	T	NA	NA	A	NA	T	NA	NA	A	NA	C	PULUT NANGKA 16::IRGC 3630-2::[IRIS 313-10480]	IRIS 313-10480	IRGC 132365	indx	29	C	T	T	-	-	-	C	C	C	T	C	-	-	-	-	A	A	G	C	T	T	-	A	-	G	G	C	T	T
IRIS_313-10523	NA	NA	NA	NA	T	NA	NA	A	NA	T	NA	NA	A	NA	C	PTB 18::IRGC 6105-1::[IRIS 313-10523]	IRIS 313-10523	IRGC 135786	indx	9	C	T	T	-	-	-	C	C	C	T	C	-	-	-	-	C	-	G	C	T	T	-	A	-	G	G	C	T	T
IRIS_313-10524	NA	NA	NA	NA	T	NA	NA	A	NA	T	NA	NA	A	NA	C	KHAO BAI SRI::IRGC 6110-2::[IRIS 313-10524]	IRIS 313-10524		ind3	29	C	T	T	-	-	-	C	C	C	T	C	-	-	-	-	A	A	G	C	T	T	-	A	-	G	G	C	T	T
IRIS_313-10536	NA	NA	NA	NA	T	NA	NA	A	NA	T	NA	NA	A	NA	C	GAMTI 1-34::IRGC 6479-2::[IRIS 313-10536]	IRIS 313-10536	IRGC 128041	ind2	16	C	T	T	-	-	-	C	C	C	T	C	-	-	-	-	C	-	G	C	T	T	-	A	-	G	G	C	T	T
IRIS_313-10554	NA	NA	NA	NA	T	NA	NA	A	NA	T	NA	NA	A	NA	C	BONG SEN::IRGC 7011-1::[IRIS 313-10554]	IRIS 313-10554	IRGC 127235	ind3	21	C	T	T	-	-	-	C	C	C	T	C	-	-	-	-	A	A	G	C	T	T	-	A	-	G	G	C	T	T
IRIS_313-10557	NA	NA	NA	NA	T	NA	NA	A	NA	T	NA	NA	A	NA	C	KONG MARETH 4 T 1::IRGC 7248-1::[IRIS 313-10557]	IRIS 313-10557	IRGC 135764	ind3	28	C	T	T	-	-	-	C	C	C	T	C	-	-	-	-	C	-	G	C	T	T	-	A	-	G	G	C	T	T
IRIS_313-10661	NA	NA	NA	NA	T	NA	NA	A	NA	T	NA	NA	A	NA	C	SAMBA::IRGC 11993-1::[IRIS 313-10661]	IRIS 313-10661	IRGC 127781	ind2	18	C	T	T	-	-	-	C	C	C	T	C	-	-	-	-	A	A	G	C	T	T	-	A	-	G	G	C	T	T
IRIS_313-10674	NA	NA	NA	NA	T	NA	NA	A	NA	T	NA	NA	A	NA	C	ARC 10846::IRGC 12656-2::[IRIS 313-10674]	IRIS 313-10674	IRGC 127932	indx	24	C	T	T	-	-	-	C	C	C	T	C	-	-	-	-	A	A	G	C	T	T	-	A	-	G	G	C	T	T
IRIS_313-10687	NA	NA	NA	NA	T	NA	NA	A	NA	T	NA	NA	A	NA	C	PADI PULUT::IRGC 13444-1::[IRIS 313-10687]	IRIS 313-10687		ind3	25	C	T	T	-	-	-	C	C	C	T	C	-	-	-	-	A	A	G	C	T	T	-	A	-	G	G	C	T	T
IRIS_313-10726	NA	NA	NA	NA	T	NA	NA	A	NA	T	NA	NA	A	NA	C	POTO BALA::IRGC 15986-2::[IRIS 313-10726]	IRIS 313-10726	IRGC 128139	ind3	29	C	T	T	-	-	-	C	C	C	T	C	-	-	-	-	A	A	G	C	T	T	-	A	-	G	G	C	T	T
IRIS_313-10728	NA	NA	NA	NA	T	NA	NA	A	NA	T	NA	NA	A	NA	C	OUSSANTHIABA::IRGC 16046-2::[IRIS 313-10728]	IRIS 313-10728	IRGC 132261	indx	23	C	T	T	-	-	-	C	C	C	T	C	-	-	-	-	A	A	G	C	T			A	-	G	G	C	T	T
IRIS_313-10733	NA	NA	NA	NA	T	NA	NA	A	NA	T	NA	NA	A	NA	C	MOTANGE PAHELLO LAULE::IRGC 16160-1::[IRIS 313-10733]	IRIS 313-10733	IRGC 127634	indx	25	C	T	T	-	-	-	C	C	C	T	C	-	-	-	-	A	A	G	C	T	T	-	A	-	G	G	C	T	T
IRIS_313-10760	NA	NA	NA	NA	T	NA	NA	A	NA	T	NA	NA	A	NA	C	ATJEH::IRGC 17174-1::[IRIS 313-10760]	IRIS 313-10760		ind3	28	C	T	T	-	-	-	C	C	C	T	C	-	-	-	-	C	-	G	C	T	T	-	A	-	G	G	C	T	T
IRIS_313-10807	NA	NA	NA	NA	T	NA	NA	A	NA	T	NA	NA	A	NA	C	RANDA KUNING::IRGC 18595-1::[IRIS 313-10807]	IRIS 313-10807		ind3	22	C	T	T	-	-	-	C	C	C	T	C	-	-	-	-	A	A	G	C	T	T	-	A	-	G	G	C	T	T
IRIS_313-10868	NA	NA	NA	NA	T	NA	NA	A	NA	T	NA	NA	A	NA	C	ARC 11571::IRGC 21487-2::[IRIS 313-10868]	IRIS 313-10868	IRGC 127939	aro	22	C	T	T	-	-	-	C	C	C	T	C	-	-	-	-	A	A	G	C	T	T	-	A	-	G	G	C	T	T
IRIS_313-10913	NA	NA	NA	NA	T	NA	NA	A	NA	T	NA	NA	A	NA	C	PHAT PRORMOL::IRGC 23143-1::[IRIS 313-10913]	IRIS 313-10913		ind3	29	C	T	T	-	-	-	C	C	C	T	C	-	-	-	-	A	A	G	C	T	T	-	A	-	G	G	C	T	T
IRIS_313-10915	NA	NA	NA	NA	T	NA	NA	A	NA	T	NA	NA	A	NA	C	PHCAR SLA KI::IRGC 23169-2::[IRIS 313-10915]	IRIS 313-10915	IRGC 128133	ind3	21	C	T	T	-	-	-	C	C	C	T	C	-	-	-	-	A	A	G	C	T	T	-	A	-	G	G	C	T	T
IRIS_313-10924	NA	NA	NA	NA	T	NA	NA	A	NA	T	NA	NA	A	NA	C	ATH HAGARI JARAHAN PADDY::IRGC 23796-1::[IRIS 313-10924]	IRIS 313-10924	IRGC 127176	indx	26	C	T	T	-	-	-	C	C	C	T	C	-	-	-	-	C	-	G	C	T	T	-	A	-	G	G	C	T	T
IRIS_313-11112	NA	NA	NA	NA	T	NA	NA	A	NA	T	NA	NA	A	NA	C	HIJOL DIGA::IRGC 31655-1::[IRIS 313-11112]	IRIS 313-11112	IRGC 128308	aus	29	C	T	T	-	-	-	C	C	C	T	C	-	-	-	-	A	A	G	C	T	T	-	A	-	G	G	C	T	T
IRIS_313-11137	NA	NA	NA	NA	T	NA	NA	A	NA	T	NA	NA	A	NA	C	NGALONGYI::IRGC 33479-2::[IRIS 313-11137]	IRIS 313-11137	IRGC 128118	indx	15	C	T	T	-	-	-	C	C	C	T	C	-	-	-	-	C	-	G	C	T	T	-	A	-	G	G	C	T	T
IRIS_313-11178	NA	NA	NA	NA	T	NA	NA	A	NA	T	NA	NA	A	NA	C	RUJAK DANAN::IRGC 35446-2::[IRIS 313-11178]	IRIS 313-11178	IRGC 128152	ind3	14	C	T	T	-	-	-	C	C	C	T	C	-	-	-	-	C	-	G	C	T	T	-	A	-	G	G	C	T	T
IRIS_313-11196	NA	NA	NA	NA	T	NA	NA	A	NA	T	NA	NA	A	NA	C	DICULA::IRGC 36729-2::[IRIS 313-11196]	IRIS 313-11196	IRGC 132333	ind3	11	C	T	T	-	-	-	C	C	C	T	C	-	-	-	-	A	A	G	C	T	T	-	A	-	G	G	C	T	T
IRIS_313-11287	NA	NA	NA	NA	T	NA	NA	A	NA	T	NA	NA	A	NA	C	ARC 18371::IRGC 42423-2::[IRIS 313-11287]	IRIS 313-11287	IRGC 127969	indx	29	C	T	T	-	-	-	C	C	C	T	C	-	-	-	-	A	A	G	C	T	T	-	A	-	G	G	C	T	T
IRIS_313-11316	NA	NA	NA	NA	T	NA	NA	A	NA	T	NA	NA	A	NA	C	RANTAT::IRGC 43563-1::[IRIS 313-11316]	IRIS 313-11316	IRGC 135790	ind3	29	C	T	T	-	-	-	C	C	C	T	C	-	-	-	-	A	A	G	C	T	T	-	A	-	G	G	C	T	T
IRIS_313-11350	NA	NA	NA	NA	T	NA	NA	A	NA	T	NA	NA	A	NA	C	BAJAL::IRGC 45024-2::[IRIS 313-11350]	IRIS 313-11350	IRGC 127983	aro	29	C	T	T	-	-	-	C	C	C	T	C	-	-	-	-	A	A	G	C	T	T	-	A	-	G	G	C	T	T
IRIS_313-11375	NA	NA	NA	NA	T	NA	NA	A	NA	T	NA	NA	A	NA	C	CODE NO 31225::IRGC 46865-2::[IRIS 313-11375]	IRIS 313-11375	IRGC 128018	aro	14	C	T	T	-	-	-	C	C	C	T	C	-	-	-	-	A	A	G	C	T	T	-	A	-	G	G	C	T	T
IRIS_313-11383	NA	NA	NA	NA	T	NA	NA	A	NA	T	NA	NA	A	NA	C	CHIEM NGAN::IRGC 47488-1::[IRIS 313-11383]	IRIS 313-11383	IRGC 127274	indx	19.5	C	T	T	-	-	-	C	C	C	T	C	-	-	-	-	A	A	G	C	T	T	-	A	-	G	G	C	T	T
IRIS_313-11419	NA	NA	NA	NA	T	NA	NA	A	NA	T	NA	NA	A	NA	C	MUTHA SAMBA::IRGC 49924-2::[IRIS 313-11419]	IRIS 313-11419		indx	14	C	T	T	-	-	-	C	C	C	T	C	-	-	-	-	C	-	G	C	T	T	-	A	-	G	G	C	T	T
IRIS_313-11490	NA	NA	NA	NA	T	NA	NA	A	NA	T	NA	NA	A	NA	C	ARC 15480::IRGC 53799-1::[IRIS 313-11490]	IRIS 313-11490	IRGC 127160	indx	23	C	T	T	-	-	-	C	C	C	T	C	-	-	-	-	A	A	G	C	T	T	-	A	-	G	G	C	T	T
IRIS_313-11506	NA	NA	NA	NA	T	NA	NA	A	NA	T	NA	NA	A	NA	C	K 15591-4::IRGC 55043-1::[IRIS 313-11506]	IRIS 313-11506	IRGC 127470	indx	25	C	T	T	-	-	-	C	C	C	T	C	-	-	-	-	A	A	G	C	T	T	-	A	-	G	G	C	T	T
IRIS_313-11517	NA	NA	NA	NA	T	NA	NA	A	NA	T	NA	NA	A	NA	C	IR 4432-28-5::IRGC 55952-1::[IRIS 313-11517]	IRIS 313-11517	IRGC 127438	ind1B	23	C	T	T	-	-	-	C	C	C	T	C	-	-	-	-	A	A	G	C	T	T	-	A	-	G	G	C	T	T
IRIS_313-11551	NA	NA	NA	NA	T	NA	NA	A	NA	T	NA	NA	A	NA	C	FELEGBASEH::IRGC 58443-1::[IRIS 313-11551]	IRIS 313-11551	IRGC 135566	ind3	18	C	T	T	-	-	-	C	C	C	T	C	-	-	-	-			G	C	T	T	-	A	-	G	G	C	T	T
IRIS_313-11610	NA	NA	NA	NA	T	NA	NA	A	NA	T	NA	NA	A	NA	C	WUA PAN LAK::IRGC 61357-1::[IRIS 313-11610]	IRIS 313-11610		ind3	10	C	T	T	-	-	-	C	C	C	T	C	-	-	-	-	C	-	G	C	T	T	-	A	-	G	G	C	T	T
IRIS_313-11640	NA	NA	NA	NA	T	NA	NA	A	NA	T	NA	NA	A	NA	C	NCS 458::IRGC 62290-1::[IRIS 313-11640]	IRIS 313-11640	IRGC 127658	ind2	29	C	T	T	-	-	-	C	C	C	T	C	-	-	-	-	A	A	G	C	T	T	-	A	-	G	G	C	T	T
IRIS_313-11674	NA	NA	NA	NA	T	NA	NA	A	NA	T	NA	NA	A	NA	C	BEUA KAE::IRGC 64221-1::[IRIS 313-11674]	IRIS 313-11674	IRGC 131971	ind3	37	C	T	T	-	-	-	C	C	C	T	C	-	-	-	-	A	A	G	C	T	T	-	A	-	G	G	C	T	T
IRIS_313-11693	NA	NA	NA	NA	T	NA	NA	A	NA	T	NA	NA	A	NA	C	CHING CH'UNG::IRGC 65002-1::[IRIS 313-11693]	IRIS 313-11693	IRGC 127278	indx	23	C	T	T	-	-	-	C	C	C	T	C	-	-	-	-	A	A	G	C	T	T	-	A	-	G	G	C	T	T
IRIS_313-11726	NA	NA	NA	NA	T	NA	NA	A	NA	T	NA	NA	A	NA	C	GUANG QING 334::IRGC 67132-1::[IRIS 313-11726]	IRIS 313-11726	IRGC 127393	ind1A	20	C	T	T	-	-	-	C	C	C	T	C	-	-	-	-	A	A	G	C	T	T	-	A	-	G	G	C	T	T
IRIS_313-11728	NA	NA	NA	NA	T	NA	NA	A	NA	T	NA	NA	A	NA	C	LUO SI ZHAN::IRGC 67211-1::[IRIS 313-11728]	IRIS 313-11728	IRGC 127581	ind3	29	C	T	T	-	-	-	C	C	C	T	C	-	-	-	-	A	A	G	C	T	T	-	A	-	G	G	C	T	T
IRIS_313-11748	NA	NA	NA	NA	T	NA	NA	A	NA	T	NA	NA	A	NA	C	GAO JIAO YING GAN ZHAN::IRGC 68053-1::[IRIS 313-11748]	IRIS 313-11748	IRGC 127378	indx	29	C	T	T	-	-	-	C	C	C	T	C	-	-	-	-	A	A	G	C	T	T	-	A	-	G	G	C	T	T
IRIS_313-11828	NA	NA	NA	NA	T	NA	NA	A	NA	T	NA	NA	A	NA	C	LALI GURMATIA::IRGC 70854-1::[IRIS 313-11828]	IRIS 313-11828	IRGC 127544	ind2	21	C	T	T	-	-	-	C	C	C	T	C	-	-	-	-	A	A	G	C	T	T	-	A	-	G	G	C	T	T
IRIS_313-11855	NA	NA	NA	NA	T	NA	NA	A	NA	T	NA	NA	A	NA	C	DA GUAN YIN ZHAN::IRGC 72006-1::[IRIS 313-11855]	IRIS 313-11855	IRGC 127292	ind1A	20	C	T	T	-	-	-	C	C	C	T	C	-	-	-	-	A	A	G	C	T	T	-	A	-	G	G	C	T	T
IRIS_313-11856	NA	NA	NA	NA	T	NA	NA	A	NA	T	NA	NA	A	NA	C	DA HEI GU::IRGC 72009-1::[IRIS 313-11856]	IRIS 313-11856	IRGC 127293	ind1A	28	C	T	T	-	-	-	C	C	C	T	C	-	-	-	-	C	-	G	C	T	T	-	A	-	G	G	C	T	T
IRIS_313-11858	NA	NA	NA	NA	T	NA	NA	A	NA	T	NA	NA	A	NA	C	DA TIE ZHAN::IRGC 72029-1::[IRIS 313-11858]	IRIS 313-11858	IRGC 127300	ind1A	25	C	T	T	-	-	-	C	C	C	T	C	-	-	-	-	C	-	G	C	T	T	-	A	-	G	G	C	T	T
IRIS_313-11872	NA	NA	NA	NA	T	NA	NA	A	NA	T	NA	NA	A	NA	C	TIE ZHONG::IRGC 72321-1::[IRIS 313-11872]	IRIS 313-11872	IRGC 127858	ind1A	9	C	T	T	-	-	-	C	C	C	T	C	-	-	-	-	C	-	G	C	T	T	-	A	-	G	G	C	T	T
IRIS_313-11878	NA	NA	NA	NA	T	NA	NA	A	NA	T	NA	NA	A	NA	C	BAI RI XIAN::IRGC 72588-1::[IRIS 313-11878]	IRIS 313-11878	IRGC 127203	ind1A	37	C	T	T	-	-	-	C	C	C	T	C	-	-	-	-	A	A	G	C	T	T	-	A	-	G	G	C	T	T
IRIS_313-11887	NA	NA	NA	NA	T	NA	NA	A	NA	T	NA	NA	A	NA	C	IR 19058-107-1::IRGC 72997-1::[IRIS 313-11887]	IRIS 313-11887	IRGC 127434	ind1B	28	C	T	T	-	-	-	C	C	C	T	C	-	-	-	-	A	A	G	C	T	T	-	A	-	G	G	C	T	T
IRIS_313-11935	NA	NA	NA	NA	T	NA	NA	A	NA	T	NA	NA	A	NA	C	KONG KHSACH BANG KATT::IRGC 75350-1::[IRIS 313-11935]	IRIS 313-11935	IRGC 132006	ind3	21	C	T	T	-	-	-	C	C	C	T	C	-	-	-	-	A	A	G	C	T	T	-	A	-	G	G	C	T	T
IRIS_313-11958	NA	NA	NA	NA	T	NA	NA	A	NA	T	NA	NA	A	NA	C	PUANG MAHLAI KHAO::IRGC 76959-1::[IRIS 313-11958]	IRIS 313-11958		ind3	29	C	T	T	-	-	-	C	C	C	T	C	-	-	-	-	A	A	G	C	T	T	-	A	-	G	G	C	T	T
IRIS_313-11985	NA	NA	NA	NA	T	NA	NA	A	NA	T	NA	NA	A	NA	C	LI TOU ZHAN::IRGC 78550-1::[IRIS 313-11985]	IRIS 313-11985	IRGC 127567	indx	23	C	T	T	-	-	-	C	C	C	T	C	-	-	-	-	A	A	G	C	T	T	-	A	-	G	G	C	T	T
IRIS_313-12007	NA	NA	NA	NA	T	NA	NA	A	NA	T	NA	NA	A	NA	C	JIA GEN::IRGC 79654-1::[IRIS 313-12007]	IRIS 313-12007	IRGC 127457	indx	19	C	T	T	-	-	-	C	C	C	T	C	-	-	-	-			G	C	T	T	-	A	-	G	G	C	T	T
IRIS_313-12012	NA	NA	NA	NA	T	NA	NA	A	NA	T	NA	NA	A	NA	A/C	ZAO LENG SHUI ZHAN::IRGC 79756-1::[IRIS 313-12012]	IRIS 313-12012	IRGC 127910	ind1A	24	C	T	T	-	-	-	C	C	C	T	C	-	-	-	-	C	-	G	C	T	T	-	A	-	G	G	C	T	T
IRIS_313-12038	NA	NA	NA	NA	T	NA	NA	A	NA	T	NA	NA	A	NA	C	MUOY KUM::IRGC 81314-1::[IRIS 313-12038]	IRIS 313-12038	IRGC 135571	ind3	23	C	T	T	-	-	-	C	C	C	T	C	-	-	-	-	A	A	G	C	T	T	-	A	-	G	G	C	T	T
IRIS_313-12039	NA	NA	NA	NA	T	NA	NA	A	NA	T	NA	NA	A	NA	C	NEANG AN::IRGC 81315-1::[IRIS 313-12039]	IRIS 313-12039	IRGC 135572	ind3	18	C	T	T	-	-	-	C	C	C	T	C	-	-	-	-	A	A	G	C	T	T	-	A	-	G	G	C	T	T
IRIS_313-12043	NA	NA	NA	NA	T	NA	NA	A	NA	T	NA	NA	A	NA	C	SAMBOK ANGKRANG::IRGC 81375-1::[IRIS 313-12043]	IRIS 313-12043	IRGC 128458	ind3	16	C	T	T	-	-	-	C	C	C	T	C	-	-	-	-	C	-	G	C	T	T	-	A	-	G	G	C	T	T
IRIS_313-12058	NA	NA	NA	NA	T	NA	NA	A	NA	T	NA	NA	A	NA	C	KUL REUSEI::IRGC 82308-1::[IRIS 313-12058]	IRIS 313-12058	IRGC 132406	ind3	37	C	T	T	-	-	-	C	C	C	T	C	-	-	-	-	A	A	G	C	T	T	-	A	-	G	G	C	T	T
IRIS_313-12093	NA	NA	NA	NA	T	NA	NA	A	NA	T	NA	NA	A	NA	C	KARUEL::IRGC 83792-1::[IRIS 313-12093]	IRIS 313-12093	IRGC 128334	indx	22	C	T	T	-	-	-	C	C	C	T	C	-	-	-	-	A	A	G	C	T	T	-	A	-	G	G	C	T	T
IRIS_313-12101	NA	NA	NA	NA	T	NA	NA	A	NA	T	NA	NA	A	NA	C	SAMRONG 2::IRGC 83951-1::[IRIS 313-12101]	IRIS 313-12101	IRGC 132298	ind3	29	C	T	T	-	-	-	C	C	C	T	C	-	-	-	-	A	A	G	C	T	T	-	A	-	G	G	C	T	T
IRIS_313-12135	NA	NA	NA	NA	T	NA	NA	A	NA	T	NA	NA	A	NA	C	PERUBAK LUEY::IRGC 86436-1::[IRIS 313-12135]	IRIS 313-12135	IRGC 127726	ind1B	23	C	T	T	-	-	-	C	C	C	T	C	-	-	-	-	A	A	G	C	T	T	-	A	-	G	G	C	T	T
IRIS_313-12138	NA	NA	NA	NA	T	NA	NA	A	NA	T	NA	NA	A	NA	C	YADU BARA::IRGC 86912-1::[IRIS 313-12138]	IRIS 313-12138	IRGC 127896	indx	23	C	T	T	-	-	-	C	C	C	T	C	-	-	-	-	A	A	G	C	T	T	-	A	-	G	G	C	T	T
IRIS_313-12152	NA	NA	NA	NA	T	NA	NA	A	NA	T	NA	NA	A	NA	C	DAMM NOEB THNGORN'::IRGC 87428-1::[IRIS 313-12152]	IRIS 313-12152	IRGC 132398	ind3	19	C	T	T	-	-	-	C	C	C	T	C	-	-	-	-	C	-	G	C	T	T	-	A	-	G	G	C	T	T
IRIS_313-12180	NA	NA	NA	NA	T	NA	NA	A	NA	T	NA	NA	A	NA	C	JHINUWA DHAN::IRGC 88545-1::[IRIS 313-12180]	IRIS 313-12180	IRGC 128323	indx	21	C	T	T	-	-	-	C	C	C	T	C	-	-	-	-	A	A	G	C	T	T	-	A	-	G	G	C	T	T
IRIS_313-12282	NA	NA	NA	NA	T	NA	NA	A	NA	T	NA	NA	A	NA	C	TSY MILA RO::IRGC 97233-1::[IRIS 313-12282]	IRIS 313-12282	IRGC 132302	indx	12	C	T	T	-	-	-	C	C	C	T	C	-	-	-	-	C	-	G	C	T	T	-	A	-	G	G	C	T	T
IRIS_313-15901	NA	NA	NA	NA	T	NA	NA	A	NA	T	NA	NA	A	NA	C	IR 77298-14-1-2-10::G1::[IRIS 313-15901]	IRIS 313-15901	IRGC 126964	ind1B	19	C	T	T	-	-	-	C	C	C	T	C	-	-	-	-	A	A	G	C	T	T	-			G	G	C	T	T
IRIS_313-7699	NA	NA	NA	NA	T	NA	NA	A	NA	T	NA	NA	A	NA	C	IR 57924-24::IRTP 16675-C1::[IRIS 313-7699]	IRIS 313-7699	IRGC 122099	indx	16	C	T	T	-	-	-	C	C	C	T	C	-	-	-	-	A	A	G	C	T	T	-	A	-	G	G	C	T	T
IRIS_313-7725	NA	NA	NA	NA	T	NA	NA	A	NA	T	NA	NA	A	NA	C	MADINIKA 1329::GERVEX 8366-C1::[IRIS 313-7725]	IRIS 313-7725	IRGC 124407	ind2	27	C	T	T	-	-	-	C	C	C	T	C	-	-	-	-	A	A	G	C	T	T	-	A	-	G	G	C	T	T
IRIS_313-7793	NA	NA	NA	NA	T	NA	NA	A	NA	T	NA	NA	A	NA	C	TSIPALA B 160::GERVEX 8378-C1::[IRIS 313-7793]	IRIS 313-7793	IRGC 124426	ind2	21	C	T	T	-	-	-	C	C	C	T	C	-	-	-	-	A	A	G	C	T	T	-	A	-	G	G	C	T	T
IRIS_313-7795	NA	NA	NA	NA	T	NA	NA	A	NA	T	NA	NA	A	NA	C	TSIPALA MENA 626::GERVEX 5392-C1::[IRIS 313-7795]	IRIS 313-7795	IRGC 124427	ind2	18	C	T	T	-	-	-	C	C	C	T	C	-	-	-	-	C	-	G	C	T	T	-	A	-	G	G	C	T	T
IRIS_313-7809	NA	NA	NA	NA	T	NA	NA	A	NA	T	NA	NA	A	NA	C	WAS 174-B-3-5::C1::[IRIS 313-7809]	IRIS 313-7809	IRGC 122286	indx	23	C	T	T	-	-	-	C	C	C	T	C	-	-	-	-	A	A	G	C	T	T	-	A	-	G	G	C	T	T
IRIS_313-7816	NA	NA	NA	NA	T	NA	NA	A	NA	T	NA	NA	A	NA	C	WAS 199-B-1-2-1::C1::[IRIS 313-7816]	IRIS 313-7816	IRGC 122288	ind1B	22	C	T	T	-	-	-	C	C	C	T	C	-	-	-	-	A	A	G	C	T	T	-	A	-	G	G	C	T	T
IRIS_313-8407	NA	NA	NA	NA	T	NA	NA	A	NA	T	NA	NA	A	NA	C	NACHIN ER 12::IRGC 14146-1::[IRIS 313-8407]	IRIS 313-8407		ind3	29	C	T	T	-	-	-	C	C	C	T	C	-	-	-	-	A	A	G	C	T	T	-	A	-	G	G	C	T	T
IRIS_313-8414	NA	NA	NA	NA	T	NA	NA	A	NA	T	NA	NA	A	NA	C	ARC 18202::IRGC 42328-1::[IRIS 313-8414]	IRIS 313-8414	IRGC 126175	indx	19	C	T	T	-	-	-	C	C	C	T	C	-	-	-	-	A	A	G	C	T	T	-	A	-	G	G	C	T	T
IRIS_313-8457	NA	NA	NA	NA	T	NA	NA	A	NA	T	NA	NA	A	NA	A	SARA::IRGC 66631-1::[IRIS 313-8457]	IRIS 313-8457		ind3	9	C	T	T	-	-	-	C	C	C	T	C	-	-	-	-	C	-				T	-	A	-	G	G	C	T	T
IRIS_313-8606	NA	NA	NA	NA	T	NA	NA	A	NA	T	NA	NA	A	NA	C	AC 13 (T 141)::IRGC 5456-1::[IRIS 313-8606]	IRIS 313-8606	IRGC 131926	ind3	29	C	T	T	-	-	-	C	C	C	T	C	-	-	-	-	A	A	G	C	T	T	-	A	-	G	G	C	T	T
IRIS_313-8659	NA	NA	NA	NA	T	NA	NA	A	NA	T	NA	NA	A	NA	C	YA THAY SAN::IRGC 58245-1::[IRIS 313-8659]	IRIS 313-8659		indx	28	C	T	T	-	-	-	C	C	C	T	C	-	-	-	-	A	A	G	C	T	T	-	A	-	G	G	C	T	T
IRIS_313-8713	NA	NA	NA	NA	T	NA	NA	A	NA	T	NA	NA	A	NA	C	NELI::IRGC 66603-1::[IRIS 313-8713]	IRIS 313-8713	IRGC 135538	ind3	13	C	T	T	-	-	-	C	C	C	T	C	-	-	-	-	A	A	G	C	T	T	-	A	-	G	G	C	T	T
IRIS_313-8811	NA	NA	NA	NA	T	NA	NA	A	NA	T	NA	NA	A	NA	C	KATUNG::IRGC 71536-1::[IRIS 313-8811]	IRIS 313-8811	IRGC 131940	ind3	16	C	T	T	-	-	-	C	C	C	T	C	-	-	-	-	C	-	G	C	T	T	-	A	-	G	G	C	T	T
IRIS_313-8831	NA	NA	NA	NA	T	NA	NA	A	NA	T	NA	NA	A	NA	C	KETAN KUNANG KUNENG::IRGC 48730-1::[IRIS 313-8831]	IRIS 313-8831		ind3	22	C	T	T	-	-	-	C	C	C	T	C	-	-	-	-	A	A	G	C	T	T	-	A	-	G	G	C	T	T
IRIS_313-8909	NA	NA	NA	NA	T	NA	NA	A	NA	T	NA	NA	A	NA	C	FAYA MOSHI::IRGC 69653-1::[IRIS 313-8909]	IRIS 313-8909	IRGC 125740	ind3	27	C	T	T	-	-	-	C	C	C	T	C	-	-	-	-	A	A	G	C	T	T	-	A	-	G	G	C	T	T
IRIS_313-9005	NA	NA	NA	NA	T	NA	NA	A	NA	T	NA	NA	A	NA	C	TJERE SUGI::IRGC 16650-1::[IRIS 313-9005]	IRIS 313-9005	IRGC 132376	ind3	23	C	T	T	-	-	-	C	C	C	T	C	-	-	-	-	A	A	G	C	T	T	-	A	-	G	G	C	T	T
IRIS_313-9020	NA	NA	NA	NA	T	NA	NA	A	NA	T	NA	NA	A	NA	C	LEUANG CHAIYAPHUM::IRGC 78266-1::[IRIS 313-9020]	IRIS 313-9020	IRGC 126983	ind3	23	C	T	T	-	-	-	C	C	C	T	C	-	-	-	-	A	A	G	C	T	T	-	A	-	G	G	C	T	T
IRIS_313-9044	NA	NA	NA	NA	T	NA	NA	A	NA	T	NA	NA	A	NA	C	IR 2071-586-5-6-3::IRGC 39291-1::[IRIS 313-9044]	IRIS 313-9044	IRGC 125971	ind1B	19	C	T	T	-	-	-	C	C	C	T	C	-	-	-	-	A	A	G	C	T	T	-	A	-	G	G	C	T	T
IRIS_313-9302	NA	NA	NA	NA	T	NA	NA	A	NA	T	NA	NA	A	NA	C	GAM PAI 30-12-15::IRGC 831-1::[IRIS 313-9302]	IRIS 313-9302	IRGC 125747	ind3	26	C	T	T	-	-	-	C	C	C	T	C	-	-	-	-	C	-	G	C	T	T	-	A	-	G	G	C	T	T
IRIS_313-9324	NA	NA	NA	NA	T	NA	NA	A	NA	T	NA	NA	A	NA	C	CHIH SHEN LI::IRGC 1306-1::[IRIS 313-9324]	IRIS 313-9324	IRGC 125702	ind1A	22	C	T	T	-	-	-	C	C	C	T	C	-	-	-	-	A	A	G	C	T	T	-	A	-	G	G	C	T	T
IRIS_313-9406	NA	NA	NA	NA	T	NA	NA	A	NA	T	NA	NA	A	NA	C	LEUANG SAWED::IRGC 78268-1::[IRIS 313-9406]	IRIS 313-9406		ind3	28	C	T	T	-	-	-	C	C	C	T	C	-	-	-	-	A	A	G	C	T	T	-	A	-	G	G	C	T	T
IRIS_313-9505	NA	NA	NA	NA	T	NA	NA	A	NA	T	NA	NA	A	NA	C	KORASISI::IRGC 5285-1::[IRIS 313-9505]	IRIS 313-9505	IRGC 125809	ind1A	23	C	T	T	-	-	-	C	C	C	T	C	-	-	-	-	A	A	G	C	T	T	-	A	-	G	G	C	T	T
IRIS_313-9567	NA	NA	NA	NA	T	NA	NA	A	NA	T	NA	NA	A	NA	C	KHAO CHUAN CHOM 452::IRGC 36571-1::[IRIS 313-9567]	IRIS 313-9567	IRGC 131914	ind3	20	C	T	T	-	-	-	C	C	C	T	C	-	-	-	-			G	C	T	T	-	A	-	G	G	C	T	T
IRIS_313-9590	NA	NA	NA	NA	T	NA	NA	A	NA	T	NA	NA	A	NA	C	KETAN SERANG::IRGC 14615-1::[IRIS 313-9590]	IRIS 313-9590	IRGC 125799	ind3	29	C	T	T	-	-	-	C	C	C	T	C	-	-	-	-	A	A	G	C	T	T	-	A	-	G	G	C	T	T
IRIS_313-9594	NA	NA	NA	NA	T	NA	NA	A	NA	T	NA	NA	A	NA	C	ASHI BINNI::IRGC 77216-1::[IRIS 313-9594]	IRIS 313-9594	IRGC 126131	indx	29	C	T	T	-	-	-	C	C	C	T	C	-	-	-	-	A	A	G	C	T	T	-	A	-	G	G	C	T	T
IRIS_313-9601	NA	NA	NA	NA	T	NA	NA	A	NA	T	NA	NA	A	NA	C	CHAWAL::IRGC 73090-1::[IRIS 313-9601]	IRIS 313-9601	IRGC 121606	aro	26	C	T	T	-	-	-	C	C	C	T	C	-	-	-	-	C	-	G	C	T	T	-	A	-	G	G	C	T	T
IRIS_313-9619	NA	NA	NA	NA	T	NA	NA	A	NA	T	NA	NA	A	NA	C	ARC 15845::IRGC 42151-1::[IRIS 313-9619]	IRIS 313-9619		indx	21	C	T	T	-	-	-	C	C	C	T	C	-	-	-	-	A	A	G	C	T	T	-	A	-	G	G	C	T	T
IRIS_313-9623	NA	NA	NA	NA	T	NA	NA	A	NA	T	NA	NA	A	NA	C	PESAGRO 102::IRGC 78703-1::[IRIS 313-9623]	IRIS 313-9623	IRGC 126001	indx	17	C	T	T	-	-	-	C	C	C	T	C	-	-	-	-	C	-	G	C	T	T	-	A	-	G	G	C	T	T
IRIS_313-9634	NA	NA	NA	NA	T	NA	NA	A	NA	T	NA	NA	A	NA	C	ARC 15873::IRGC 43250-1::[IRIS 313-9634]	IRIS 313-9634	IRGC 125653	indx	27	C	T	T	-	-	-	C	C	C	T	C	-	-	-	-	A	A	G	C	T	T	-	A	-	G	G	C	T	T
IRIS_313-9709	NA	NA	NA	NA	T	NA	NA	A	NA	T	NA	NA	A	NA	C	MAKALIOKA::IRGC 376-1::[IRIS 313-9709]	IRIS 313-9709	IRGC 125832	ind2	17	C	T	T	-	-	-	C	C	C	T	C	-	-	-	-	A	A	G	C	T	T	-	A	-	G	G	C	T	T
IRIS_313-9817	NA	NA	NA	NA	T	NA	NA	A	NA	T	NA	NA	A	NA	C	GEANT W 7::IRGC 9620-1::[IRIS 313-9817]	IRIS 313-9817	IRGC 121342	ind2	18	C	T	T	-	-	-	C	C	C	T	C	-	-	-	-	C	-	G	C	T	T	-	A	-	G	G	C	T	T
IRIS_313-9831	NA	NA	NA	NA	T	NA	NA	A	NA	T	NA	NA	A	NA	C	PODIWEE::IRGC 11938-1::[IRIS 313-9831]	IRIS 313-9831	IRGC 125872	indx	28	C	T	T	-	-	-	C	C	C	T	C	-	-	-	-	A	A	G	C	T	T	-	A	-	G	G	C	T	T
IRIS_313-9922	NA	NA	NA	NA	T	NA	NA	A	NA	T	NA	NA	A	NA	C	IRI 339::IRGC 46956-1::[IRIS 313-9922]	IRIS 313-9922	IRGC 125778	ind1B	29	C	T	T	-	-	-	C	C	C	T	C	-	-	-	-	A	A	G	C	T	T	-	A	-	G	G	C	T	T
IRIS_313-9936	NA	NA	NA	NA	T	NA	NA	A	NA	T	NA	NA	A	NA	C	SITHAIYAN KOTTAI SAMBA::IRGC 50155-1::[IRIS 313-9936]	IRIS 313-9936	IRGC 126143	ind2	18	C	T	T	-	-	-	C	C	C	T	C	-	-	-	-	A	A	G	C	T	T	-	A	-	G	G	C	T	T
CX357	NA	C/T	NA	NA	T	NA	NA	A	NA	T	NA	NA	A	NA	C	PSBRC80::[CX357]	CX357	IRGC 136023	ind1B	27	C	T	T	-	-	-	C	C	C	T	C	-	-	-	-	A	A	G	C	T	T	-	A	-	G	G	C	T	T
CX91	NA	C/T	NA	NA	T	NA	NA	A	NA	T	NA	NA	A	NA	C	GOVIND::[CX91]	CX91	IRGC 135897	ind1B	16	C	T	T	-	-	-	C	C	C	T	C	-	-	-	-	A	A	G	C	T	T	-	A	-	G	G	C	T	T
IRIS_313-10366	NA	C/T	NA	NA	T	NA	NA	A	NA	T	NA	NA	A	NA	C	IR 65483-111-5-9-2-11::IRGC 117286-1::[IRIS 313-10366]	IRIS 313-10366	IRGC 125976	indx	23	C	T	T	-	-	-	C	C	C	T	C	-	-	-	-	A	A	G	C	T	T	-	A	-	G	G	C	T	T
IRIS_313-10610	NA	C/T	NA	NA	T	NA	NA	A	NA	T	NA	NA	A	NA	C	ALAGUSAMBA::IRGC 8944-2::[IRIS 313-10610]	IRIS 313-10610	IRGC 132315	ind2	21	C	T	T	-	-	-	C	C	C	T	C	-	-	-	-	A	A	G	C	T	T	-	A	-	G	G	C	T	T
IRIS_313-10668	NA	C/T	NA	NA	T	NA	NA	A	NA	T	NA	NA	A	NA	C	ARC 7255::IRGC 12343-2::[IRIS 313-10668]	IRIS 313-10668	IRGC 127974	indx	19	C	T	T	-	-	-	C	C	C	T	C	-	-	-	-	A	A	G	C	T	T	-	A	-	G	G	C	T	T
IRIS_313-11087	NA	C/T	NA	NA	T	NA	NA	A	NA	T	NA	NA	A	NA	C	PONG SANG A::IRGC 29881-2::[IRIS 313-11087]	IRIS 313-11087		ind3	17	C	T	T	-	-	-	C	C	C	T	C	-	-	-	-	C	-	G	C	T	T	-	A	-	G	G	C	T	T
IRIS_313-11264	NA	C/T	NA	NA	T	NA	NA	A	NA	T	NA	NA	A	NA	C	ARC 13934::IRGC 41325-2::[IRIS 313-11264]	IRIS 313-11264	IRGC 132241	indx	29	C	T	T	-	-	-	C	C	C	T	C	-	-	-	-	A	A	G	C	T	T	-	A	-	G	G	C	T	T
IRIS_313-11382	NA	C/T	NA	NA	T	NA	NA	A	NA	T	NA	NA	A	NA	C	HONDERAWALA::IRGC 47372-1::[IRIS 313-11382]	IRIS 313-11382		indx	29	C	T	T	-	-	-	C	C	C	T	C	-	-	-	-	A	A	G	C	T			A	-	G	G	C	T	T
IRIS_313-11389	NA	C/T	NA	NA	T	NA	NA	A	NA	T	NA	NA	A	NA	C	LEUANG PRA TAHN::IRGC 48292-2::[IRIS 313-11389]	IRIS 313-11389		ind3	19	C	T	T	-	-	-	C	C	C	T	C	-	-	-	-	A	A	G	C	T	T	-	A	-	G	G	C	T	T
IRIS_313-11648	NA	C/T	NA	NA	T	NA	NA	A	NA	T	NA	NA	A	NA	C	NCS 830::IRGC 62518-1::[IRIS 313-11648]	IRIS 313-11648	IRGC 127667	ind2	29	C	T	T	-	-	-	C	C	C	T	C	-	-	-	-	A	A	G	C	T	T	-	A	-	G	G	C	T	T
IRIS_313-11687	NA	C/T	NA	NA	T	NA	NA	A	NA	T	NA	NA	A	NA	C	SA GAE::IRGC 64613-1::[IRIS 313-11687]	IRIS 313-11687	IRGC 132297	ind3	32	C	T	T	-	-	-	C	C	C	T	C	-	-	-	-	A	A	G	C	T	T	-	A	-	G	G	C	T	T
IRIS_313-11710	NA	C/T	NA	NA	T	NA	NA	A	NA	T	NA	NA	A	NA	C	LEUANG MAI::IRGC 66019-2::[IRIS 313-11710]	IRIS 313-11710	IRGC 134992	ind3	37	C	T	T	-	-	-	C	C	C	T	C	-	-	-	-	A	A	G	C	T	T	-	A	-	G	G	C	T	T
IRIS_313-11732	NA	C/T	NA	NA	T	NA	NA	A	NA	T	NA	NA	A	NA	C	QING ZAO 3::IRGC 67281-1::[IRIS 313-11732]	IRIS 313-11732	IRGC 127755	ind1A	29	C	T	T	-	-	-	C	C	C	T	C	-	-	-	-	A	A	G	C	T	T	-	A	-	G	G	C	T	T
IRIS_313-11793	NA	C/T	NA	NA	T	NA	NA	A	NA	T	NA	NA	A	NA	C	KOMALIOKO::IRGC 69958-1::[IRIS 313-11793]	IRIS 313-11793	IRGC 128350	ind2	23	C	T	T	-	-	-	C	C	C	T	C	-	-	-	-	A	A	G	C	T	T	-	A	-	G	G	C	T	T
IRIS_313-11811	NA	C/T	NA	NA	T	NA	NA	A	NA	T	NA	NA	A	NA	C	MOSHI::IRGC 70648-1::[IRIS 313-11811]	IRIS 313-11811	IRGC 127632	ind2	29	C	T	T	-	-	-	C	C	C	T	C	-	-	-	-	A	A	G	C	T	T	-	A	-	G	G	C	T	T
IRIS_313-11854	NA	C/T	NA	NA	T	NA	NA	A	NA	T	NA	NA	A	NA	C	CHI GU::IRGC 71988-1::[IRIS 313-11854]	IRIS 313-11854	IRGC 127276	ind1A	23	C	T	T	-	-	-	C	C	C	T	C	-	-	-	-	A	A	G	C	T	T	-	A	-	G	G	C	T	T
IRIS_313-11867	NA	C/T	NA	NA	T	NA	NA	A	NA	T	NA	NA	A	NA	C	KE SHU BAI::IRGC 72183-1::[IRIS 313-11867]	IRIS 313-11867	IRGC 127503	ind1A	29	C	T	T	-	-	-	C	C	C	T	C	-	-	-	-	A	A	G	C	T	T	-	A	-	G	G	C	T	T
IRIS_313-11905	NA	C/T	NA	NA	T	NA	NA	A	NA	T	NA	NA	A	NA	C	PAYO TINGGI::IRGC 73778-1::[IRIS 313-11905]	IRIS 313-11905	IRGC 132414	ind3	25	C	T	T	-	-	-	C	C	C	T	C	-	-	-	-	A	A	G	C	T	T	-	A	-	G	G	C	T	T
IRIS_313-12109	NA	C/T	NA	NA	T	NA	NA	A	NA	T	NA	NA	A	NA	C	ARITH::IRGC 84347-2::[IRIS 313-12109]	IRIS 313-12109	IRGC 127975	ind3	23	C	T	T	-	-	-	C	C	C	T	C	-	-	-	-	A	A	G	C	T	T	-	A	-	G	G	C	T	T
IRIS_313-12292	NA	C/T	NA	NA	T	NA	NA	A	NA	T	NA	NA	A	NA	C	EMAHTAKYAN::IRGC 97789-1::[IRIS 313-12292]	IRIS 313-12292	IRGC 127358	ind3	23	C	T	T	-	-	-	C	C	C	T	C	-	-	-	-	A	A	G	C	T	T	-	A	-	G	G	C	T	T
IRIS_313-7689	NA	C/T	NA	NA	T	NA	NA	A	NA	T	NA	NA	A	NA	C	IR 2307-247-2-2-3::IRGC 77982-C1::[IRIS 313-7689]	IRIS 313-7689	IRGC 122092	ind1B	27	C	T	T	-	-	-	C	C	C	T	C	-	-	-	-	A	A	G	C	T	T	-	A	-	G	G	C	T	T
IRIS_313-8291	NA	C/T	NA	NA	T	NA	NA	A	NA	T	NA	NA	A	NA	C	KEDOT::IRGC 66568-1::[IRIS 313-8291]	IRIS 313-8291		ind3	20	C	T	T	-	-	-	C	C	C	T	C	-	-	-	-	A	A	G	C	T	T	-	A	-	G	G	C	T	T
IRIS_313-8986	NA	C/T	NA	NA	T	NA	NA	A	NA	T	NA	NA	A	NA	C	ARC 10754::IRGC 12603-1::[IRIS 313-8986]	IRIS 313-8986	IRGC 125637	indx	21	C	T	T	-	-	-	C	C	C	T	C	-	-	-	-	A	A	G	C	T	T	-	A	-	G	G	C	T	T
IRIS_313-9314	NA	C/T	NA	NA	T	NA	NA	A	NA	T	NA	NA	A	NA	C	KAAKARAN::IRGC 27138-1::[IRIS 313-9314]	IRIS 313-9314		indx	17	C	T	T	-	-	-	C	C	C	T	C	-	-	-	-	A	A	G	C	T	T	-	A	-	G	G	C	T	T
IRIS_313-9862	NA	C/T	NA	NA	T	NA	NA	A	NA	T	NA	NA	A	NA	A	MODDAI KARUPPAN::IRGC 15465-1::[IRIS 313-9862]	IRIS 313-9862	IRGC 126139	ind2	12	C	T	T	-	-	-	C	C	C	T	C	-	-	-	-	A	A	G	C	T	T	-	A	-	G	G	C	T	T
B001	NA	C	NA	NA	T	NA	NA	A	NA	T	NA	NA	A	NA	C	HEIBIAO::[B001]	B001	IRGC 135900	temp	27.5	C	T	T	-	-	-	C	C	C	T	C	-	-	-	-	C	-/A	G	C	T	T	-/A	A	-/A	G	G	C	T	T
B033	NA	C	NA	NA	T	NA	NA	A	NA	T	NA	NA	A	NA	C	BW 293-2::[B033]	B033	IRGC 135853	ind1B	27	C	T	T	-	-	-	C	C	C	T	C	-	-	-	-	A	A	G	C	T	T	-	A	-	G	G	C	T	T
B035	NA	C	NA	NA	T	NA	NA	A	NA	T	NA	NA	A	NA	C	AMERICAN RICE::[B035]	B035	IRGC 135828	indx	17	C	T	T	-	-	-	C	C	C	T	C	-	-	-	-	A	A	G	C	T	T	-	A	-	G	G	C	T	T
B063	NA	C	NA	NA	T	NA	NA	A	NA	T	NA	NA	A	NA	C	GUIZHAO 2::[B063]	B063		ind1A	17	C	T	T	-	-	-	C	C	C	T	C	-	-	-	-	A	A	G	C	T	T	-	A	-	G	G	C	T	T
B064	NA	C	NA	NA	T	NA	NA	A	NA	T	NA	NA	A	NA	C	XIANGZAOXIAN 7::[B064]	B064		indx	21	C	T	T	-	-	-	C	C	C	T	C	-	-	-	-	A	A	G	C	T	T	-	A	-	G	G	C	T	T
B073	NA	C	NA	NA	T	NA	NA	A	NA	T	NA	NA	A	NA	C	JINXIBAI2::[B073]	B073		indx	29	C	T	T	-	-	-	C	C	C	T	C	-	-	-	-	A	A	G	C	T	T	-	A	-	G	G	C	T	T
B076	NA	C	NA	NA	T	NA	NA	A	NA	T	NA	NA	A	NA	C	MINBEIWANXIAN::[B076]	B076		indx	21	C	T	T	-	-	-	C	C	C	T	C	-	-	-	-	A	A	G	C	T	T	-	A	-	G	G	C	T	T
B079	NA	C	NA	NA	T	NA	NA	A	NA	T	NA	NA	A	NA	C	ESINIU::[B079]	B079	IRGC 135887	ind1A	20	C	T	T	-	-	-	C	C	C	T	C	-	-	-	-	A	A	G	C	T	T	-	A	-	G	G	C	T	T
B081	NA	C	NA	NA	T	NA	NA	A	NA	T	NA	NA	A	NA	C	HEIDU 4::[B081]	B081	IRGC 135901	ind1A	29	C	T	T	-	-	-	C	C	C	T	C	-	-	-	-	A	A	G	C	T	T	-	A	-	G	G	C	T	T
B086	NA	C	NA	NA	T	NA	NA	A	NA	T	NA	NA	A	NA	C	MUGUANUO::[B086]	B086		admix	27	C	T	T	-	-	-	C	C	C	T	C	-	-	-	-	A	A	G	C	T	T	-	A	-	G	G	C	T	T
B087	NA	C	NA	NA	T	NA	NA	A	NA	T	NA	NA	A	NA	C	ZHONGNONG 4::[B087]	B087		ind2	9	C	T	T	-	-	-	C	C	C	T	C	-	-	-	-	C	-	G	C	T	T	-	A	-	G	G	C	T	T
B088	NA	C	NA	NA	T	NA	NA	A	NA	T	NA	NA	A	NA	C	SAN**QISHILUO::[B088]	B088		indx	10	C	T	T	-	-	-	C	C	C	T	C	-	-	-	-	C	-	G	C	T	T	-	A	-					T
B106	NA	C	NA	NA	T	NA	NA	A	NA	T	NA	NA	A	NA	C	WENXIANGNUO::[B106]	B106		indx	21	C	T	T	-	-	-	C	C	C	T	C	-	-	-	-	A	A	G	C	T	T	-	A	-	G	G	C	T	T
B113	NA	C	NA	NA	T	NA	NA	A	NA	T	NA	NA	A	NA	C	CHENWAN 3::[B113]	B113		indx	23	C	T	T	-	-	-	C	C	C	T	C	-	-	-	-	A	A	G	C	T	T	-	A	-	G	G	C	T
B115	NA	C	NA	NA	T	NA	NA	A	NA	T	NA	NA	A	NA	C	AIMAKANG::[B115]	B115		ind1A	21	C	T	T	-	-	-	C	C	C	T	C	-	-	-	-	A	A	G	C	T	T	-	A	-	G	G	C	T	T
B122	NA	C	NA	NA	T	NA	NA	A	NA	T	NA	NA	A	NA	C	LIAOGENG 287::[B122]	B122		temp	20	C	T	T	-	-	-	C	C	C	T	C	-	-	-	-	A	A	G	C	T	T	-	A	-	G	G	C	T	T
B129	NA	C	NA	NA	T	NA	NA	A	NA	T	NA	NA	A	NA	C	HONGAINUO::[B129]	B129		indx	23	C	T	T	-	-	-	C	C	C	T	C	-	-	-	-	A	A	G	C	T	T	-	A	-	G	G	C	T	T
B131	NA	C	NA	NA	T	NA	NA	A	NA	T	NA	NA	A	NA	C	AIZIZHAN::[B131]	B131		indx	21	C	T	T	-	-	-	C	C	C	T	C	-	-	-	-	A	A	G	C	T	T	-	A	-	G	G	C	T	T
B149	NA	C	NA	NA	T	NA	NA	A	NA	T	NA	NA	A	NA	C	HAOXIANG::[B149]	B149		ind1A	23	C	T	T	-	-	-	C	C	C	T	C	-	-	-	-	A	A	G	C	T	T	-	A	-	G	G	C	T	T
B163	NA	C	NA	NA	T	NA	NA	A	NA	T	NA	NA	A	NA	C	LIUSHIZAO::[B163]	B163		ind1A	17	C	T	T	-	-	-	C	C	C	T	C	-	-	-	-	C	-/A	G	C	T	T	-/A	A	-/A	G	G	C	T	T
B165	NA	C	NA	NA	T	NA	NA	A	NA	T	NA	NA	A	NA	C	HAOHUANGLA::[B165]	B165		indx	16	C	T	T	-	-	-	C	C	C	T	C	-	-	-	-			G	C	T	T	-	A	-	G	G	C	T	T
B184	NA	C	NA	NA	T	NA	NA	A	NA	T	NA	NA	A	NA	C	CHANH 148::[B184]	B184	IRGC 135862	indx	12	C	T	T	-	-	-	C	C	C	T	C	-	-	-	-	A	A	G	C	T	T	-	A	-	G	G	C	T	T
B203	NA	C	NA	NA	T	NA	NA	A	NA	T	NA	NA	A	NA	C	BIWUSHENG::[B203]	B203		indx	5	C	T	T	-	-	-	C	C	C	T	C	-	-	-	-	C	-	G	C	T	T	-	A	-	G	G	C	T	T
B219	NA	C	NA	NA	T	NA	NA	A	NA	T	NA	NA	A	NA	C	HAOLAI::[B219]	B219		indx	18	C	T	T	-	-	-	C	C	C	T	C	-	-	-	-	C	-	G	C	T	T	-	A	-	G	G	C	T	T
B227	NA	C	NA	NA	T	NA	NA	A	NA	T	NA	NA	A	NA	C	MENJIAGAO 1::[B227]	B227		indx	8	C	T	T	-	-	-	C	C	C	T	C	-	-	-	-	C	-	G	C	T	T	-	A	-	G	G	C	T	T
B231	NA	C	NA	NA	T	NA	NA	A	NA	T	NA	NA	A	NA	C	B231::[B231]	B231		indx	25	C	T	T	-	-	-	C	C	C	T	C	-	-	-	-	A	A	G	C	T	T	-	A	-	G	G	C	T	T
B233	NA	C	NA	NA	T	NA	NA	A	NA	T	NA	NA	A	NA	C	XIANGWANXIAN 1::[B233]	B233		indx	20	C	T	T	-	-	-	C	C	C	T	C	-	-	-	-	A	A	G	C	T	T	-	A	-	G	G	C	T	T
B259	NA	C	NA	NA	T	NA	NA	A	NA	T	NA	NA	A	NA	C	LEIHUOZHAN::[B259]	B259		ind1A	26	C	T	T	-	-	-	C	C	C	T	C	-	-	-	-	A	A	G	C	T	T	-	A	-	G	G	C	T	T
B265	NA	C	NA	NA	T	NA	NA	A	NA	T	NA	NA	A	NA	C	WUKEZHAN::[B265]	B265		indx	29	C	T	T	-	-	-	C	C	C	T	C	-	-	-	-	A	A	G	C	T	T	-	A	-	G	G	C	T	T
CX102	NA	C	NA	NA	T	NA	NA	A	NA	T	NA	NA	A	NA	C	TEK SI CHUT::[CX102]	CX102	IRGC 136053	ind1A	29	C	T	T	-	-	-	C	C	C	T	C	-	-	-	-	A	A	G	C	T	T	-	A	-	G	G	C	T	T
CX107	NA	C	NA	NA	T	NA	NA	A	NA	T	NA	NA	A	NA	C	TUN SART::[CX107]	CX107	IRGC 136060	ind3	29	C	T	T	-	-	-	C	C	C	T	C	-	-	-	-	A	A	G	C	T	T	-	A	-	G	G	C	T	T
CX118	NA	C	NA	NA	T	NA	NA	A	NA	T	NA	NA	A	NA	C	YETUOZAI::[CX118]	CX118		indx	22	C	T	T	-	-	-	C	C	C	T	C	-	-	-	-	A	A	G	C	T	T	-	A	-	G	G	C	T	T
CX119	NA	C	NA	NA	T	NA	NA	A	NA	T	NA	NA	A	NA	C	P59279::[CX119]	CX119		indx	11	C	T	T	-	-	-	C	C	C	T	C	-	-	-	-	C	-	G	C	T	T	-	A	-	G	G	C	T	T
CX120	NA	C	NA	NA	T	NA	NA	A	NA	T	NA	NA	A	NA	C	TKM6::[CX120]	CX120	IRGC 136057	indx	33	C	T	T	-	-	-	C	C	C	T	C	-	-	-	-	A	A	G	C	T	T	-	A	-	G	G	C	T	T
CX121	NA	C	NA	NA	T	NA	NA	A	NA	T	NA	NA	A	NA	C	GUANG122::[CX121]	CX121		ind1B	23	C	T	T	-	-	-	C	C	C	T	C	-	-	-	-	A	A	G	C	T	T	-	A	-	G	G	C	T	T
CX124	NA	C	NA	NA	T	NA	NA	A	NA	T	NA	NA	A	NA	C	IR71466-75-3-B-1::[CX124]	CX124	IRGC 135936	indx	26	C	T	T	-	-	-	C	C	C	T	C	-	-	-	-	A	A	G	C	T	T	-	A	-	G	G	C	T	T
CX148	NA	C	NA	NA	T	NA	NA	A	NA	T	NA	NA	A	NA	C	SRI RAJA::[CX148]	CX148	IRGC 136050	ind3	29	C	T	T	-	-	-	C	C	C	T	C	-	-	-	-	A	A	G	C	T	T	-	A	-	G	G	C	T	T
CX156	NA	C	NA	NA	T	NA	NA	A	NA	T	NA	NA	A	NA	C	MR84::[CX156]	CX156	IRGC 135995	indx	21	C	T	T	-	-	-	C	C	C	T	C	-	-	-	-	A	A	G	C	T	T	-	A	-	G	G	C	T	T
CX158	NA	C	NA	NA	T	NA	NA	A	NA	T	NA	NA	A	NA	C	SHWE WAR TUN::[CX158]	CX158	IRGC 136046	ind3	22	C	T	T	-	-	-	C	C	C	T	C	-	-	-	-	A	A	G	C	T	T	-	A	-	G	G	C	T	T
CX165	NA	C	NA	NA	T	NA	NA	A	NA	T	NA	NA	A	NA	C	WUYUGENG 3::[CX165]	CX165	IRGC 136071	temp	21	C	T	T	-	-	-	C	C	C	T	C	-	-	-	-	A	A	G	C	T	T	-	A	-	G	G	C	T	T
CX19	NA	C	NA	NA	T	NA	NA	A	NA	T	NA	NA	A	NA	C	ZHONG 413::[CX19]	CX19		indx	15	C	T	T	-	-	-	C	C	C	T	C	-	-	-	-	A	A	G	C	T	T	-	A	-	G	G	C	T	T
CX225	NA	C	NA	NA	T	NA	NA	A	NA	T	NA	NA	A	NA	C	IR77298-14-1-2::[CX225]	CX225	IRGC 135938	ind1B	17	C	T	T	-	-	-	C	C	C	T	C	-	-	-	-	A	A	G	C	T	T	-	A	-	G	G	C	T	T
CX226	NA	C	NA	NA	T	NA	NA	A	NA	T	NA	NA	A	NA	C	IR06G113::[CX226]	CX226	IRGC 135916	ind1B	21	C	T	T	-	-	-	C	C	C	T	C	-	-	-	-	A	A	G	C	T	T	-	A	-	G	G	C	T	T
CX23	NA	C	NA	NA	T	NA	NA	A	NA	T	NA	NA	A	NA	C	RASI::[CX23]	CX23		ind3	11	C	T	T	-	-	-	C	C	C	T	C	-	-	-	-	C	-	G	C	T	T	-	A	-	G	G	C	T	T
CX233	NA	C	NA	NA	T	NA	NA	A	NA	T	NA	NA	A	NA	C	IR58821-23-1-3-1::[CX233]	CX233	IRGC 135926	indx	26	C	T	T	-	-	-	C	C	C	T	C	-	-	-	-	A	A	G	C	T	T	-	A	-	G	G	C	T	T
CX26	NA	C	NA	NA	T	NA	NA	A	NA	T	NA	NA	A	NA	C	AMOL3(SANA)::[CX26]	CX26		ind1B	19	C	T	T	-	-	-	C	C	C	T	C	-	-	-	-	A	A	G	C	T	T	-	A	-	G	G	C	T	T
CX318	NA	C	NA	NA	T	NA	NA	A	NA	T	NA	NA	A	NA	C	HEIHEAIHUI::[CX318]	CX318		indx	21	C	T	T	-	-	-	C	C	C	T	C	-	-	-	-	A	A	G	C	T	T	-	A	-	G	G	C	T	T
CX341	NA	C	NA	NA	T	NA	NA	A	NA	T	NA	NA	A	NA	C	HUA 565::[CX341]	CX341	IRGC 135908	indx	27	C	T	T	-	-	-	C	C	C	T	C	-	-	-	-	A	A	G	C	T	T	-	A	-	G	G	C	T	T
CX346	NA	C	NA	NA	T	NA	NA	A	NA	T	NA	NA	A	NA	C	SAGCï¼4::[CX346]	CX346	IRGC 136038	indx	21	C	T	T	-	-	-	C	C	C	T	C	-	-	-	-	A	A	G	C	T	T	-	A	-	G	G	C	T	T
CX348	NA	C	NA	NA	T	NA	NA	A	NA	T	NA	NA	A	NA	C	ZHONGHUA 1::[CX348]	CX348	IRGC 136093	ind1B	18	C	T	T	-	-	-	C	C	C	T	C	-	-	-	-	A	A	G	C	T	T	-	A	-	G	G	C	T	T
CX349	NA	C	NA	NA	T	NA	NA	A	NA	T	NA	NA	A	NA	C	KCD1::[CX349]	CX349	IRGC 135965	indx	20	C	T	T	-	-	-	C	C	C	T	C	-	-	-	-	A	A	G	C	T	T	-	A	-	G	G	C	T	T
CX350	NA	C	NA	NA	T	NA	NA	A	NA	T	NA	NA	A	NA	C	WUYUGENG 20::[CX350]	CX350		temp	19	C	T	T	-	-	-	C	C	C	T	C	-	-	-	-	A	A	G	C	T	T	-	A	-	G	G	C	T	T
CX360	NA	C	NA	NA	T	NA	NA	A	NA	T	NA	NA	A	NA	C	Y075::[CX360]	CX360		ind1B	17	C	T	T	-	-	-	C	C	C	T	C	-	-	-	-	A	A	G	C	T	T	-	A	-	G	G	C	T	T
CX364	NA	C	NA	NA	T	NA	NA	A	NA	T	NA	NA	A	NA	C	42686::[CX364]	CX364		ind1B	27	C	T	T	-	-	-	C	C	C	T	C	-	-	-	-	A	A	G	C	T	T	-	A	-	G	G	C	T	T
CX370	NA	C	NA	NA	T	NA	NA	A	NA	T	NA	NA	A	NA	C	CHENGHUI 727::[CX370]	CX370		ind1B	12	C	T	T	-	-	-	C	C	C	T	C	-	-	-	-	A	A	G	C	T	T	-	A	-	G	G	C	T	T
CX377	NA	C	NA	NA	T	NA	NA	A	NA	T	NA	NA	A	NA	C	NERICA-L-27::[CX377]	CX377	IRGC 136006	ind1B	10	C	T	T	-	-	-	C	C	C	T	C	-	-	-	-	A	A	G	C	T	T	-	A	-	G	G	C	T	T
CX378	NA	C	NA	NA	T	NA	NA	A	NA	T	NA	NA	A	NA	C	HUHAN 15::[CX378]	CX378		ind1B	15	C	T	T	-	-	-	C	C	C	T	C	-	-	-	-	A	A	G	C	T	T	-	A	-	G	G	C	T	T
CX379	NA	C	NA	NA	T	NA	NA	A	NA	T	NA	NA	A	NA	C	NIONOKA::[CX379]	CX379	IRGC 136008	ind1B	10	C	T	T	-	-	-	C	C	C	T	C	-	-	-	-	A	A	G	C	T	T	-	A	-	G	G	C	T	T
CX380	NA	C	NA	NA	T	NA	NA	A	NA	T	NA	NA	A	NA	C	YANDAO 9::[CX380]	CX380		temp	12	C	T	T	-	-	-	C	C	C	T	C	-	-	-	-	A	A	G	C	T	T	-	A	-	G	G	C	T	T
CX381	NA	C	NA	NA	T	NA	NA	A	NA	T	NA	NA	A	NA	C	ADNY 11::[CX381]	CX381	IRGC 135821	ind1B	18	C	T	T	-	-	-	C	C	C	T	C	-	-	-	-	A	A	G	C	T	T	-	A	-	G	G	C	T	T
CX385	NA	C	NA	NA	T	NA	NA	A	NA	T	NA	NA	A	NA	C	NPT-100::[CX385]	CX385	IRGC 136011	ind1B	14	C	T	T	-	-	-	C	C	C	T	C	-	-	-	-	A	A	G	C	T	T	-	A	-	G	G	C	T	T
CX399	NA	C	NA	NA	T	NA	NA	A	NA	T	NA	NA	A	NA	C	MATATAG2::[CX399]	CX399	IRGC 135982	ind1B	12	C	T	T	-	-	-	C	C	C	T	C	-	-	-	-	C	-	G	C	T	T	-	A	-	G	G	C	T	T
CX403	NA	C	NA	NA	T	NA	NA	A	NA	T	NA	NA	A	NA	C	IR64A::[CX403]	CX403		ind1B	22	C	T	T	-	-	-	C	C	C	T	C	-	-	-	-	A	A	G	C	T	T	-	A	-	G	G	C	T	T
CX42	NA	C	NA	NA	T	NA	NA	A	NA	T	NA	NA	A	NA	C	IR68552-55-3-2::[CX42]	CX42	IRGC 135933	indx	16	C	T	T	-	-	-	C	C	C	T	C	-	-	-	-	A	A	G	C	T	T	-	A	-	G	G	C	T	T
CX426	NA	C	NA	NA	T	NA	NA	A	NA	T	NA	NA	A	NA	C	CX426::[CX426]	CX426		ind1B	20	C	T	T	-	-	-	C	C	C	T	C	-	-	-	-	A	A	G	C	T	T	-	A	-	G	G	C	T	T
CX44	NA	C	NA	NA	T	NA	NA	A	NA	T	NA	NA	A	NA	C	IR58025B::[CX44]	CX44	IRGC 135925	ind1B	19	C	T	T	-	-	-	C	C	C	T	C	-	-	-	-	A	A	G	C	T	T	-	A	-	G	G	C	T	T
CX561	NA	C	NA	NA	T	NA	NA	A	NA	T	NA	NA	A	NA	C	CX561::[CX561]	CX561		ind1B	29	C	T	T	-	-	-	C	C	C	T	C	-	-	-	-	A	A	G	C	T	T	-	A	-	G	G	C	T	T
CX578	NA	C	NA	NA	T	NA	NA	A	NA	T	NA	NA	A	NA	C	CX578::[CX578]	CX578		temp	29	C	T	T	-	-	-	C	C	C	T	C	-	-	-	-	A	A	G	C	T	T	-	A	-	G	G	C	T	T
CX579	NA	C	NA	NA	T	NA	NA	A	NA	T	NA	NA	A	NA	C	CX579::[CX579]	CX579		admix	28	C	T	T	-	-	-	C	C	C	T	C	-	-	-	-	A	A	G	C	T	T	-	A	-	G	G	C	T	T
CX68	NA	C	NA	NA	T	NA	NA	A	NA	T	NA	NA	A	NA	C	MR106::[CX68]	CX68	IRGC 135989	indx	13	C	T	T	-	-	-	C	C	C	T	C	-	-	-	-	C	-	G	C	T	T	-	A	-	G	G	C	T	T
CX71	NA	C	NA	NA	T	NA	NA	A	NA	T	NA	NA	A	NA	C	INNMAYEBAW::[CX71]	CX71	IRGC 135915	ind3	11	C	T	T	-	-	-	C	C	C	T	C	-	-	-	-			G	C	T	T	-	A	-	G	G	C	T	T
CX75	NA	C	NA	NA	T	NA	NA	A	NA	T	NA	NA	A	NA	C	AT354::[CX75]	CX75	IRGC 135832	indx	16	C	T	T	-	-	-	C	C	C	T	C	-	-	-	-	C	-	G	C	T	T	-	A	-	G	G	C	T	T
CX76	NA	C	NA	NA	T	NA	NA	A	NA	T	NA	NA	A	NA	C	BG304::[CX76]	CX76	IRGC 135841	ind1B	19	C	T	T	-	-	-	C	C	C	T	C	-	-	-	-	A	A	G	C	T	T	-	A	-	G	G	C	T	T
CX88	NA	C	NA	NA	T	NA	NA	A	NA	T	NA	NA	A	NA	C	HUANYANGNIAN::[CX88]	CX88		ind1A	10	C	T	T	-	-	-	C	C	C	T	C	-	-	-	-	A	A	G	C	T	T	-	A	-	G	G	C	T	T
CX97	NA	C	NA	NA	T	NA	NA	A	NA	T	NA	NA	A	NA	C	BUDDA::[CX97]	CX97	IRGC 135851	ind1B	29	C	T	T	-	-	-	C	C	C	T	C	-	-	-	-	A	A	G	C	T	T	-	A	-	G	G	C	T	T
IRIS_313-10010	NA	C	NA	NA	T	NA	NA	A	NA	T	NA	NA	A	NA	C	LALKA (LAL DHAN)::IRGC 64946-1::[IRIS 313-10010]	IRIS 313-10010	IRGC 125818	ind2	29	C	T	T	-	-	-	C	C	C	T	C	-	-	-	-	A	A	G	C	T	T	-	A	-	G	G	C	T	T
IRIS_313-10034	NA	C	NA	NA	T	NA	NA	A	NA	T	NA	NA	A	NA	C	RIZ INDETERMINE::IRGC 69014-1::[IRIS 313-10034]	IRIS 313-10034	IRGC 125886	indx	16	C	T	T	-	-	-	C	C	C	T	C	-	-	-	-	C	-	G	C	T	T	-	A	-	G	G	C	T	T
IRIS_313-10045	NA	C	NA	NA	T	NA	NA	A	NA	T	NA	NA	A	NA	C	BANTA TIMA::IRGC 69474-1::[IRIS 313-10045]	IRIS 313-10045	IRGC 125673	indx	15	C	T	T	-	-	-	C	C	C	T	C	-	-	-	-	C	-	G	C	T	T	-	A	-	G	G	C	T	T
IRIS_313-10048	NA	C	NA	NA	T	NA	NA	A	NA	T	NA	NA	A	NA	C	MOVE (MOKOLE)::IRGC 69739-1::[IRIS 313-10048]	IRIS 313-10048	IRGC 125996	indx	19	C	T	T	-	-	-	C	C	C	T	C	-	-	-	-	C	-	G	C	T	T	-	A	-	G	G	C	T	T
IRIS_313-10050	NA	C	NA	NA	T	NA	NA	A	NA	T	NA	NA	A	NA	C	TSIMATAHOPAOSA::IRGC 69884-1::[IRIS 313-10050]	IRIS 313-10050	IRGC 127091	indx	20	C	T	T	-	-	-	C	C	C	T	C	-	-	-	-	A	A	G	C	T	T	-	A	-	G	G	C	T	T
IRIS_313-10077	NA	C	NA	NA	T	NA	NA	A	NA	T	NA	NA	A	NA	C	TAMASHIRO HIKARI::IRGC 74534-1::[IRIS 313-10077]	IRIS 313-10077	IRGC 125917	indx	16	C	T	T	-	-	-	C	C	C	T	C	-	-	-	-	A	A	G	C	T	T	-	A	-	G	G	C	T	T
IRIS_313-10147	NA	C	NA	NA	T	NA	NA	A	NA	T	NA	NA	A	NA	C	RD 19::IRGC 39174-1::[IRIS 313-10147]	IRIS 313-10147		ind3	17	C	T	T	-	-	-	C	C	C	T	C	-	-	-	-	C	-	G	C	T	T	-	A	-	G	G	C	T	T
IRIS_313-10177	NA	C	NA	NA	T	NA	NA	A	NA	T	NA	NA	A	NA	C	DA GANG ZHAN::IRGC 67103-1::[IRIS 313-10177]	IRIS 313-10177	IRGC 125719	indx	37	C	T	T	-	-	-	C	C	C	T	C	-	-	-	-	A	A	G	C	T	T	-	A	-	G	G	C	T	T
IRIS_313-10226	NA	C	NA	NA	T	NA	NA	A	NA	T	NA	NA	A	NA	C	TONG GU HONG::IRGC 81026-1::[IRIS 313-10226]	IRIS 313-10226	IRGC 125925	indx	18	C	T	T	-	-	-	C	C	C	T	C	-	-	-	-	A	A	G	C	T	T	-	A	-	G	G	C	T	T
IRIS_313-10237	NA	C	NA	NA	T	NA	NA	A	NA	T	NA	NA	A	NA	C	PSBRC 86::IRGC 99716-1::[IRIS 313-10237]	IRIS 313-10237		ind1B	19	C	T	T	-	-	-	C	C	C	T	C	-	-	-	-	C	-	G	C	T	T	-	A	-	G	G	C	T	T
IRIS_313-10260	NA	C	NA	NA	T	NA	NA	A	NA	T	NA	NA	A	NA	C	CEA 3::IRGC 116965-1::[IRIS 313-10260]	IRIS 313-10260	IRGC 125957	indx	22	C	T	T	-	-	-	C	C	C	T	C	-	-	-	-	A	A	G	C	T	T	-	A	-	G	G	C	T	T
IRIS_313-10272	NA	C	NA	NA	T	NA	NA	A	NA	T	NA	NA	A	NA	C	COLOMBIA 1::IRGC 116970-1::[IRIS 313-10272]	IRIS 313-10272	IRGC 125714	japx	12	C	T	T	-	-	-	C	C	C	T	C	-	-	-	-	A	A	G	C	T	T	-			G	G	C	T	T
IRIS_313-10294	NA	C	NA	NA	T	NA	NA	A	NA	T	NA	NA	A	NA	C	IR 21015-72-3-3-3-1::IRGC 117004-1::[IRIS 313-10294]	IRIS 313-10294	IRGC 125972	indx	7	C	T	T	-	-	-	C	C	C	T	C	-	-	-	-	C	-	G	C	T	T	-	A	-	G	G	C	T	T
IRIS_313-10325	NA	C	NA	NA	T	NA	NA	A	NA	T	NA	NA	A	NA	C	CAMPONI::IRGC 116963-1::[IRIS 313-10325]	IRIS 313-10325	IRGC 125956	indx	28	C	T	T	-	-	-	C	C	C	T	C	-	-	-	-	A	A	G	C	T	T	-	A	-	G	G	C	T	T
IRIS_313-10371	NA	C	NA	NA	T	NA	NA	A	NA	T	NA	NA	A	NA	C	IR 67518-B-11-1-B::IRGC 117380-1::[IRIS 313-10371]	IRIS 313-10371	IRGC 126026	indx	28	C	T	T	-	-	-	C	C	C	T	C	-	-	-	-	A	A	G	C	T	T	-	A	-	G	G	C	T	T
IRIS_313-10374	NA	C	NA	NA	T	NA	NA	A	NA	T	NA	NA	A	NA	C	IR 69502-6-SRN-3-UBN-1-B::IRGC 117290-1::[IRIS 313-10374]	IRIS 313-10374	IRGC 125979	indx	17	C	T	T	-	-	-	C	C	C	T	C	-	-	-	-	C	-	G	C	T	T	-	A	-	G	G	C	T	T
IRIS_313-10385	NA	C	NA	NA	T	NA	NA	A	NA	T	NA	NA	A	NA	C	IR 75870-5-8-5-B-1::IRGC 117297-1::[IRIS 313-10385]	IRIS 313-10385	IRGC 126062	ind1B	13	C	T	T	-	-	-	C	C	C	T	C	-	-	-	-	A	A	G	C	T	T	-	A	-	G	G	C	T	T
IRIS_313-10422	NA	C	NA	NA	T	NA	NA	A	NA	T	NA	NA	A	NA	C	WAR 87-7-A10-2-B-B-B-1::IRGC 117362-1::[IRIS 313-10422]	IRIS 313-10422		indx	9	C	T	T	-	-	-	C	C	C	T	C	-	-	-	-	C	-	G	C	T	T	-	A	-	G	G	C	T	T
IRIS_313-10433	NA	C	NA	NA	T	NA	NA	A	NA	T	NA	NA	A	NA	C	TP MIL 53::IRGC 326-2::[IRIS 313-10433]	IRIS 313-10433	IRGC 128193	indx	10	C	T	T	-	-	-	C	C	C	T	C	-	-	-	-	C	-	G	C	T	T	-	A	-	G	G	C	T	T
IRIS_313-10452	NA	C	NA	NA	T	NA	NA	A	NA	T	NA	NA	A	NA	C	LING TA 150::IRGC 1106-1::[IRIS 313-10452]	IRIS 313-10452	IRGC 127565	ind1A	5	C	T	T	-	-	-	C	C	C	T	C	-	-	-	-	A	A	G	C	T	T	-	A	-	G	G	C	T	T
IRIS_313-10503	NA	C	NA	NA	T	NA	NA	A	NA	T	NA	NA	A	NA	C	HA GOO::IRGC 4577-1::[IRIS 313-10503]	IRIS 313-10503	IRGC 127398	ind1A	29	C	T	T	-	-	-	C	C	C	T	C	-	-	-	-	A	A	G	C	T	T	-	A	-	G	G	C	T	T
IRIS_313-10504	NA	C	NA	NA	T	NA	NA	A	NA	T	NA	NA	A	NA	C	HSIEH DAU::IRGC 4727-1::[IRIS 313-10504]	IRIS 313-10504	IRGC 127419	ind1A	17	C	T	T	-	-	-	C	C	C	T	C	-	-	-	-	C	-	G	C	T	T	-	A	-	G	G	C	T	T
IRIS_313-10517	NA	C	NA	NA	T	NA	NA	A	NA	T	NA	NA	A	NA	C	SIPOT::IRGC 5825-1::[IRIS 313-10517]	IRIS 313-10517	IRGC 127812	ind3	17	C	T	T	-	-	-	C	C	C	T	C	-	-	-	-	A	A	G	C	T	T	-	A	-	G	G	C	T	T
IRIS_313-10525	NA	C	NA	NA	T	NA	NA	A	NA	T	NA	NA	A	NA	C	BANDANG PUTIH 680::IRGC 6133-2::[IRIS 313-10525]	IRIS 313-10525	IRGC 132246	ind3	25	C	T	T	-	-	-	C	C	C	T	C	-	-	-	-	C	-	G	C	T	T	-	A	-	G	G	C	T	T
IRIS_313-10542	NA	C	NA	NA	T	NA	NA	A	NA	T	NA	NA	A	NA	C	BELLO::IRGC 6658-2::[IRIS 313-10542]	IRIS 313-10542	IRGC 127992	ind2	12	C	T	T	-	-	-	C	C	C	T	C	-	-	-	-	A	A	G	C	T	T	-	A	-	G	G	C	T	T
IRIS_313-10547	NA	C	NA	NA	T	NA	NA	A	NA	T	NA	NA	A	NA	C	C 34-13::IRGC 6797-2::[IRIS 313-10547]	IRIS 313-10547	IRGC 128007	indx	29	C	T	T	-	-	-	C	C	C	T	C	-	-	-	-	A	A	G	C	T	T	-	A	-	G	G	C	T	T
IRIS_313-10574	NA	C	NA	NA	T	NA	NA	A	NA	T	NA	NA	A	NA	C	KAILUNDO::IRGC 7859-2::[IRIS 313-10574]	IRIS 313-10574	IRGC 132253	indx	17	C	T	T	-	-	-	C	C	C	T	C	-	-	-	-	C	-	G	C	T	T	-	A	-	G	G	C	T	T
IRIS_313-10652	NA	C	NA	NA	T	NA	NA	A	NA	T	NA	NA	A	NA	C	CHAO PEUAK DENG::IRGC 11602-1::[IRIS 313-10652]	IRIS 313-10652	IRGC 127268	ind3	28	C	T	T	-	-	-	C	C	C	T	C	-	-	-	-	A	A	G	C	T	T	-	A	-	G	G	C	T	T
IRIS_313-10659	NA	C	NA	NA	T	NA	NA	A	NA	T	NA	NA	A	NA	C	LONG MA::IRGC 11867-1::[IRIS 313-10659]	IRIS 313-10659	IRGC 127574	ind3	20	C	T	T	-	-	-	C	C	C	T	C	-	-	-	-	C	-	G	C	T	T	-	A	-	G	G	C	T	T
IRIS_313-10666	NA	C	NA	NA	T	NA	NA	A	NA	T	NA	NA	A	NA	C	ARC 6218::IRGC 12255-1::[IRIS 313-10666]	IRIS 313-10666	IRGC 127164	indx	24	C	T	T	-	-	-	C	C	C	T	C	-	-	-	-	C	-	G	C	T	T	-	A	-	G	G	C	T	T
IRIS_313-10675	NA	C	NA	NA	T	NA	NA	A	NA	T	NA	NA	A	NA	C	ARC 10905::IRGC 12669-1::[IRIS 313-10675]	IRIS 313-10675	IRGC 127132	indx	23	C	T	T	-	-	-	C	C	C	T	C	-	-	-	-	A	A	G	C	T	T	-	A	-	G	G	C	T	T
IRIS_313-10678	NA	C	NA	NA	T	NA	NA	A	NA	T	NA	NA	A	NA	C	MAKALIOKA::IRGC 12781-2::[IRIS 313-10678]	IRIS 313-10678	IRGC 132353	ind2	24	C	T	T	-	-	-	C	C	C	T	C	-	-	-	-			G	C	T	T	-	A	-	G	G	C	T	T
IRIS_313-10682	NA	C	NA	NA	T	NA	NA	A	NA	T	NA	NA	A	NA	C	PA KHENG::IRGC 12996-1::[IRIS 313-10682]	IRIS 313-10682	IRGC 127707	ind3	29	C	T	T	-	-	-	C	C	C	T	C	-	-	-	-	A	A	G	C	T	T	-	A	-	G	G	C	T	T
IRIS_313-10683	NA	C	NA	NA	T	NA	NA	A	NA	T	NA	NA	A	NA	C	NGAN TIA::IRGC 13010-1::[IRIS 313-10683]	IRIS 313-10683	IRGC 127674	ind3	19	C	T	T	-	-	-	C	C	C	T	C	-	-	-	-	A	A	G	C	T	T	-	A	-	G	G	C	T	T
IRIS_313-10698	NA	C	NA	NA	T	NA	NA	A	NA	T	NA	NA	A	NA	C	RADIN GOI::IRGC 13969-1::[IRIS 313-10698]	IRIS 313-10698	IRGC 127759	ind3	18	C	T	T	-	-	-	C	C	C	T	C	-	-	-	-	C	-	G	C	T	T	-	A	-	G	G	C	T	T
IRIS_313-10702	NA	C	NA	NA	T	NA	NA	A	NA	T	NA	NA	A	NA	C	JAROM EMAS::IRGC 14272-1::[IRIS 313-10702]	IRIS 313-10702		ind3	21	C	T	T	-	-	-	C	C	C	T	C	-	-	-	-	A	A	G	C	T	T	-	A	-	G	G	C	T	T
IRIS_313-10721	NA	C	NA	NA	T	NA	NA	A	NA	T	NA	NA	A	NA	A	HALSUDU HEENATI::IRGC 15599-1::[IRIS 313-10721]	IRIS 313-10721	IRGC 127401	ind2	14	C	T	T	-	-	-	C	C	C	T	C	-	-	-	-	C	-	G	C	T	T	-	A	-	G	G	C	T	T
IRIS_313-10723	NA	C	NA	NA	T	NA	NA	A	NA	T	NA	NA	A	NA	C	MOND BA::IRGC 15813-2::[IRIS 313-10723]	IRIS 313-10723	IRGC 128111	ind2	16	C	T	T	-	-	-	C	C	C	T	C	-	-	-	-	A	A	G	C	T	T	-	A	-	G	G	C	T	T
IRIS_313-10727	NA	C	NA	NA	T	NA	NA	A	NA	T	NA	NA	A	NA	C	KOUPENEDOU KOUBOURY::IRGC 16011-1::[IRIS 313-10727]	IRIS 313-10727		ind3	18	C	T	T	-	-	-	C	C	C	T	C	-	-	-	-	A	A	G	C	T	T	-	A	-	G	G	C	T	T
IRIS_313-10732	NA	C	NA	NA	T	NA	NA	A	NA	T	NA	NA	A	NA	C	MADHUWA KARIA::IRGC 16138-2::[IRIS 313-10732]	IRIS 313-10732	IRGC 128102	aro	19	C	T	T	-	-	-	C	C	C	T	C	-	-	-	-	A	A	G	C	T	T	-	A	-	G	G	C	T	T
IRIS_313-10748	NA	C	NA	NA	T	NA	NA	A	NA	T	NA	NA	A	NA	C	LUA DUC::IRGC 16718-1::[IRIS 313-10748]	IRIS 313-10748	IRGC 127578	indx	23	C	T	T	-	-	-	C	C	C	T	C	-	-	-	-	A	A	G	C	T	T	-	A	-	G	G	C	T	T
IRIS_313-10749	NA	C	NA	NA	T	NA	NA	A	NA	T	NA	NA	A	NA	C	MINH SOC (CAMBODIA)::IRGC 16731-2::[IRIS 313-10749]	IRIS 313-10749		ind3	24	C	T	T	-	-	-	C	C	C	T	C	-	-	-	-	A	A	G	C	T	T	-	A	-	G	G	C	T	T
IRIS_313-10751	NA	C	NA	NA	T	NA	NA	A	NA	T	NA	NA	A	NA	C	LUA CHUM::IRGC 16840-1::[IRIS 313-10751]	IRIS 313-10751	IRGC 127577	indx	18	C	T	T	-	-	-	C	C	C	T	C	-	-	-	-	C	-	G	C	T	T	-	A	-	G	G	C	T	T
IRIS_313-10782	NA	C	NA	NA	T	NA	NA	A	NA	T	NA	NA	A	NA	C	KETAN NARIS::IRGC 17925-2::[IRIS 313-10782]	IRIS 313-10782	IRGC 128078	ind3	20	C	T	T	-	-	-	C	C	C	T	C	-	-	-	-	C	-	G	C	T	T	-	A	-	G	G	C	T	T
IRIS_313-10791	NA	C	NA	NA	T	NA	NA	A	NA	T	NA	NA	A	NA	C	MANGSUR::IRGC 18187-1::[IRIS 313-10791]	IRIS 313-10791	IRGC 127602	ind3	20	C	T	T	-	-	-	C	C	C	T	C	-	-	-	-	C	-	G	C	T	T	-	A	-	G	G	C	T	T
IRIS_313-10793	NA	C	NA	NA	T	NA	NA	A	NA	T	NA	NA	A	NA	C	MELIK::IRGC 18238-2::[IRIS 313-10793]	IRIS 313-10793	IRGC 132257	trop	28	C	T	T	-	-	-	C	C	C	T	C	-	-	-	-	C	-	G	C	T	T	-	A	-	G	G	C	T	T
IRIS_313-10797	NA	C	NA	NA	T	NA	NA	A	NA	T	NA	NA	A	NA	C	NARUN::IRGC 18320-2::[IRIS 313-10797]	IRIS 313-10797	IRGC 132357	ind3	23	C	T	T	-	-	-	C	C	C	T	C	-	-	-	-	A	A	G	C	T	T	-	A	-	G	G	C	T	T
IRIS_313-10813	NA	C	NA	NA	T	NA	NA	A	NA	T	NA	NA	A	NA	C	SIAM BARABAI::IRGC 18800-2::[IRIS 313-10813]	IRIS 313-10813		ind3	29	C	T	T	-	-	-	C	C	C	T	C	-	-	-	-	A	A	G	C	T	T	-	A	-	G	G	C	T	T
IRIS_313-10818	NA	C	NA	NA	T	NA	NA	A	NA	T	NA	NA	A	NA	C	TJEMPO PENDEK UNTUNG::IRGC 19055-2::[IRIS 313-10818]	IRIS 313-10818	IRGC 128188	ind3	17	C	T	T	-	-	-	C	C	C	T	C	-	-	-	-	C	-	G	C	T	T	-	A	-	G	G	C	T	T
IRIS_313-10819	NA	C	NA	NA	T	NA	NA	A	NA	T	NA	NA	A	NA	C	TJERE ENER::IRGC 19103-1::[IRIS 313-10819]	IRIS 313-10819	IRGC 127860	ind3	27	C	T	T	-	-	-	C	C	C	T	C	-	-	-	-	C	-	G	C	T	T	-	A	-	G	G	C	T	T
IRIS_313-10821	NA	C	NA	NA	T	NA	NA	A	NA	T	NA	NA	A	NA	C	TJ PERAK::IRGC 19141-1::[IRIS 313-10821]	IRIS 313-10821	IRGC 127862	ind3	18	C	T	T	-	-	-	C	C	C	T	C	-	-	-	-			G	C	T	T	-	A	-	G	G	C	T	T
IRIS_313-10823	NA	C	NA	NA	T	NA	NA	A	NA	T	NA	NA	A	NA	C	UTRI DELI::IRGC 19182-1::[IRIS 313-10823]	IRIS 313-10823	IRGC 127880	ind3	13	C	T	T	-	-	-	C	C	C	T	C	-	-	-	-	A	A	G	C	T	T	-	A	-	G	G	C	T	T
IRIS_313-10847	NA	C	NA	NA	T	NA	NA	A	NA	T	NA	NA	A	NA	C	ARC 6015::IRGC 20314-2::[IRIS 313-10847]	IRIS 313-10847	IRGC 127972	indx	27	C	T	T	-	-	-	C	C	C	T	C	-	-	-	-	A	A	G	C	T	T	-	A	-	G	G	C	T	T
IRIS_313-10858	NA	C	NA	NA	T	NA	NA	A	NA	T	NA	NA	A	NA	C	ARC 10894::IRGC 21122-1::[IRIS 313-10858]	IRIS 313-10858	IRGC 127131	indx	29	C	T	T	-	-	-	C	C	C	T	C	-	-	-	-	A	A	G	C	T	T	-	A	-	G	G	C	T	T
IRIS_313-10885	NA	C	NA	NA	T	NA	NA	A	NA	T	NA	NA	A	NA	C	ARC 12559::IRGC 22148-2::[IRIS 313-10885]	IRIS 313-10885	IRGC 127942	indx	14	C	T	T	-	-	-	C	C	C	T	C	-	-	-	-	A	A	G	C	T	T	-	A	-	G	G	C	T	T
IRIS_313-10887	NA	C	NA	NA	T	NA	NA	A	NA	T	NA	NA	A	NA	C	ARC 12690::IRGC 22257-1::[IRIS 313-10887]	IRIS 313-10887	IRGC 127147	indx	24	C	T	T	-	-	-	C	C	C	T	C	-	-	-	-	C	-	G	C	T	T	-	A	-	G	G	C	T	T
IRIS_313-10897	NA	C	NA	NA	T	NA	NA	A	NA	T	NA	NA	A	NA	C	ARC 13373::IRGC 22691-1::[IRIS 313-10897]	IRIS 313-10897	IRGC 128227	ind3	20	C	T	T	-	-	-	C	C	C	T	C	-	-	-	-	C	-	G	C	T	T	-	A	-	G	G	C	T	T
IRIS_313-10898	NA	C	NA	NA	T	NA	NA	A	NA	T	NA	NA	A	NA	C	ANG KANG K P::IRGC 22716-2::[IRIS 313-10898]	IRIS 313-10898	IRGC 127928	ind3	15	C	T	T	-	-	-	C	C	C	T	C	-	-	-	-	A	A	G	C	T	T	-	A	-	G	G	C	T	T
IRIS_313-10901	NA	C	NA	NA	T	NA	NA	A	NA	T	NA	NA	A	NA	C	DAMNOEUB THPOIL HING::IRGC 22856-2::[IRIS 313-10901]	IRIS 313-10901	IRGC 128027	ind3	9	C	T	T	-	-	-	C	C	C	T	C	-	-	-	-	C	-	G	C	T	T	-	A	-	G	G	C	T	T
IRIS_313-10937	NA	C	NA	NA	T	NA	NA	A	NA	T	NA	NA	A	NA	C	PULUT WAJIT::IRGC 24624-1::[IRIS 313-10937]	IRIS 313-10937	IRGC 135788	ind3	24	C	T	T	-	-	-	C	C	C	T	C	-	-	-	-	A	A	G	C	T	T	-	A	-	G	G	C	T	T
IRIS_313-10940	NA	C	NA	NA	T	NA	NA	A	NA	T	NA	NA	A	NA	C	SITANDANG::IRGC 24681-1::[IRIS 313-10940]	IRIS 313-10940	IRGC 127814	ind3	18	C	T	T	-	-	-	C	C	C	T	C	-	-	-	-	C	-	G	C	T	T	-	A	-	G	G	C	T	T
IRIS_313-10944	NA	C	NA	NA	T	NA	NA	A	NA	T	NA	NA	A	NA	C	SIPULUT SUBANG::IRGC 24824-2::[IRIS 313-10944]	IRIS 313-10944	IRGC 132269	ind3	26	C	T	T	-	-	-	C	C	C	T	C	-	-	-	-	A	A	G	C	T	T	-	A	-	G	G	C	T	T
IRIS_313-10950	NA	C	NA	NA	T	NA	NA	A	NA	T	NA	NA	A	NA	C	ASE PULU BOLONG::IRGC 25171-1::[IRIS 313-10950]	IRIS 313-10950	IRGC 127174	trop	16	C	T	T	-	-	-	C	C	C	T	C	-	-	-	-	C	-	G	C	T	T	-	A	-	G	G	C	T	T
IRIS_313-10955	NA	C	NA	NA	T	NA	NA	A	NA	T	NA	NA	A	NA	C	PADI PUYUH::IRGC 25532-1::[IRIS 313-10955]	IRIS 313-10955	IRGC 127702	ind3	27	C	T	T	-	-	-	C	C	C	T	C	-	-	-	-	A	A	G	C	T	T	-	A	-	G	G	C	T	T
IRIS_313-10970	NA	C	NA	NA	T	NA	NA	A	NA	T	NA	NA	A	NA	C	NANG SAU DO::IRGC 26243-1::[IRIS 313-10970]	IRIS 313-10970		ind3	20	C	T	T	-	-	-	C	C	C	T	C	-	-	-	-	C	-	G	C	T	T	-	A	-	G	G	C	T	T
IRIS_313-10973	NA	C	NA	NA	T	NA	NA	A	NA	T	NA	NA	A	NA	C	KALA DIGHA::IRGC 26367-2::[IRIS 313-10973]	IRIS 313-10973	IRGC 128064	ind2	20	C	T	T	-	-	-	C	C	C	T	C	-	-	-	-	C	-	G	C	T	T	-	A	-	G	G	C	T	T
IRIS_313-10977	NA	C	NA	NA	T	NA	NA	A	NA	T	NA	NA	A	NA	C	MATI CHAL::IRGC 26399-2::[IRIS 313-10977]	IRIS 313-10977	IRGC 128107	ind2	18	C	T	T	-	-	-	C	C	C	T	C	-	-	-	-	A	A	G	C	T	T	-	A	-	G	G	C	T	T
IRIS_313-10983	NA	C	NA	NA	T	NA	NA	A	NA	T	NA	NA	A	NA	C	BOROJYOT::IRGC 26578-2::[IRIS 313-10983]	IRIS 313-10983	IRGC 128000	indx	8	C	T	T	-	-	-	C	C	C	T	C	-	-	-	-	C	-	G	C	T	T	-	A	-	G	G	C	T	T
IRIS_313-10989	NA	C	NA	NA	T	NA	NA	A	NA	T	NA	NA	A	NA	C	GUTTI AKKULLU::IRGC 26850-2::[IRIS 313-10989]	IRIS 313-10989	IRGC 128046	ind2	25	C	T	T	-	-	-	C	C	C	T	C	-	-	-	-	C	-	G	C	T	T	-	A	-	G	G	C	T	T
IRIS_313-10990	NA	C	NA	NA	T	NA	NA	A	NA	T	NA	NA	A	NA	C	BALIBUD::IRGC 26871-1::[IRIS 313-10990]	IRIS 313-10990	IRGC 127206	indx	24	C	T	T	-	-	-	C	C	C	T	C	-	-	-	-	A	A	G	C	T	T	-	A	-	G	G	C	T	T
IRIS_313-11005	NA	C	NA	NA	T	NA	NA	A	NA	T	NA	NA	A	NA	C	PULU LOTONG::IRGC 27380-2::[IRIS 313-11005]	IRIS 313-11005	IRGC 128140	trop	27	C	T	T	-	-	-	C	C	C	T	C	-	-	-	-	A	A	G	C	T	T	-	A	-	G	G	C	T	T
IRIS_313-11006	NA	C	NA	NA	T	NA	NA	A	NA	T	NA	NA	A	NA	C	PULU RENNI::IRGC 27386-1::[IRIS 313-11006]	IRIS 313-11006	IRGC 127747	ind3	14	C	T	T	-	-	-	C	C	C	T	C	-	-	-	-	C	-	G	C	T	T	-	A	-	G	G	C	T	T
IRIS_313-11010	NA	C	NA	NA	T	NA	NA	A	NA	T	NA	NA	A	NA	C	PULUT PUTIH::IRGC 27426-1::[IRIS 313-11010]	IRIS 313-11010	IRGC 127750	ind3	18	C	T	T	-	-	-	C	C	C	T	C	-	-	-	-	A	A	G	C	T	T	-	A	-	G	G	C	T	T
IRIS_313-11011	NA	C	NA	NA	T	NA	NA	A	NA	T	NA	NA	A	NA	C	SUNAR::IRGC 27470-1::[IRIS 313-11011]	IRIS 313-11011	IRGC 127830	indx	17	C	T	T	-	-	-	C	C	C	T	C	-	-	-	-	A	A	G	C	T	T	-	A	-	G	G	C	T	T
IRIS_313-11026	NA	C	NA	NA	T	NA	NA	A	NA	T	NA	NA	A	NA	C	HANSRAJ::IRGC 27936-2::[IRIS 313-11026]	IRIS 313-11026	IRGC 132336	aro	13	C	T	T	-	-	-	C	C	C	T	C	-	-	-	-	A	A	G	C	T	T	-	A	-	G	G	C	T	T
IRIS_313-11040	NA	C	NA	NA	T	NA	NA	A	NA	T	NA	NA	A	NA	C	KAVIVARI SAMBA::IRGC 28597-2::[IRIS 313-11040]	IRIS 313-11040		indx	31	C	T	T	-	-	-	C	C	C	T	C	-	-	-	-	A	A	G	C	T	T	-	A	-	G	G	C	T	T
IRIS_313-11042	NA	C	NA	NA	T	NA	NA	A	NA	T	NA	NA	A	NA	A	VELLAIKOTTAI::IRGC 28618-1::[IRIS 313-11042]	IRIS 313-11042		indx	22	C	T	T	-	-	-	C	C	C	T	C	-	-	-	-	A	A	G	C	T	T	-	A	-	G	G	C	T	T
IRIS_313-11071	NA	C	NA	NA	T	NA	NA	A	NA	T	NA	NA	A	NA	C	CHAO HAI::IRGC 29450-2::[IRIS 313-11071]	IRIS 313-11071	IRGC 128011	indx	27	C	T	T	-	-	-	C	C	C	T	C	-	-	-	-	A	A	G	C	T	T	-	A	-	G	G	C	T	T
IRIS_313-11079	NA	C	NA	NA	T	NA	NA	A	NA	T	NA	NA	A	NA	C	PHAN PHAE::IRGC 29652-2::[IRIS 313-11079]	IRIS 313-11079	IRGC 128132	ind3	29	C	T	T	-	-	-	C	C	C	T	C	-	-	-	-	A	A	G	C	T	T	-	A	-	G	G	C	T	T
IRIS_313-11083	NA	C	NA	NA	T	NA	NA	A	NA	T	NA	NA	A	NA	C	EA TIA::IRGC 29713-2::[IRIS 313-11083]	IRIS 313-11083	IRGC 132248	ind3	37	C	T	T	-	-	-	C	C	C	T	C	-	-	-	-	A	A	G	C	T	T	-	A	-	G	G	C	T	T
IRIS_313-11084	NA	C	NA	NA	T	NA	NA	A	NA	T	NA	NA	A	NA	C	KABIN::IRGC 29752-1::[IRIS 313-11084]	IRIS 313-11084		ind3	9	C	T	T	-	-	-	C	C	C	T	C	-	-	-	-	C	-	G	C	T	T	-	A	-	G	G	C	T	T
IRIS_313-11089	NA	C	NA	NA	T	NA	NA	A	NA	T	NA	NA	A	NA	C	SRAU THMOR::IRGC 29904-1::[IRIS 313-11089]	IRIS 313-11089	IRGC 127824	ind3	29	C	T	T	-	-	-	C	C	C	T	C	-	-	-	-	A	A	G	C	T	T	-	A	-	G	G	C	T	T
IRIS_313-11099	NA	C	NA	NA	T	NA	NA	A	NA	T	NA	NA	A	NA	C	PECALO::IRGC 30595-2::[IRIS 313-11099]	IRIS 313-11099		ind2	20	C	T	T	-	-	-	C	C	C	T	C	-	-	-	-	C	-	G	C	T	T	-	A	-	G	G	C	T	T
IRIS_313-11118	NA	C	NA	NA	T	NA	NA	A	NA	T	NA	NA	A	NA	C	SOC NAU (BIEN THE)::IRGC 32074-1::[IRIS 313-11118]	IRIS 313-11118	IRGC 135797	ind3	23	C	T	T	-	-	-	C	C	C	T	C	-	-	-	-	A	A	G	C	T	T	-	A	-	G	G	C	T	T
IRIS_313-11120	NA	C	NA	NA	T	NA	NA	A	NA	T	NA	NA	A	NA		GURULEY::IRGC 32441-1::[IRIS 313-11120]	IRIS 313-11120	IRGC 127396	ind2	16	C	T	T	-	-	-	C	C	C	T	C	-	-	-	-	A	A	G	C	T	T	-	A	-	G	G	C	T	T
IRIS_313-11125	NA	C	NA	NA	T	NA	NA	A	NA	T	NA	NA	A	NA	C	DHALA AMAN 973::IRGC 32861-1::[IRIS 313-11125]	IRIS 313-11125		admix	14	C	T	T	-	-	-	C	C	C	T	C	-	-	-	-	C	-	G	C	T	T	-	A	-	G	G	C	T	T
IRIS_313-11135	NA	C	NA	NA	T	NA	NA	A	NA	T	NA	NA	A	NA	C	MAUNG NYO::IRGC 33351-2::[IRIS 313-11135]	IRIS 313-11135	IRGC 128108	ind3	28	C	T	T	-	-	-	C	C	C	T	C	-	-	-	-	C	-	G	C	T	T	-	A	-	G	G	C	T	T
IRIS_313-11140	NA	C	NA	NA	T	NA	NA	A	NA	T	NA	NA	A	NA	C	PADAN::IRGC 33544-2::[IRIS 313-11140]	IRIS 313-11140	IRGC 128123	ind3	14	C	T	T	-	-	-	C	C	C	T	C	-	-	-	-	C	-	G	C	T	T	-	A	-	G	G	C	T	T
IRIS_313-11141	NA	C	NA	NA	T	NA	NA	A	NA	T	NA	NA	A	NA	C	SHWENI::IRGC 33686-2::[IRIS 313-11141]	IRIS 313-11141	IRGC 128161	indx	17	C	T	T	-	-	-	C	C	C	T	C	-	-	-	-	C	-	G	C	T	T	-	A	-	G	G	C	T	T
IRIS_313-11143	NA	C	NA	NA	T	NA	NA	A	NA	T	NA	NA	A	NA	C	TANBAUNG::IRGC 33732-2::[IRIS 313-11143]	IRIS 313-11143	IRGC 128180	indx	16	C	T	T	-	-	-	C	C	C	T	C	-	-	-	-	A	A	G	C	T	T	-	A	-	G	G	C	T	T
IRIS_313-11150	NA	C	NA	NA	T	NA	NA	A	NA	T	NA	NA	A	NA	C	ZEINGYI::IRGC 33923-2::[IRIS 313-11150]	IRIS 313-11150	IRGC 128206	ind3	9	C	T	T	-	-	-	C	C	C	T	C	-	-	-	-	C	-	G	C	T	T	-	A	-	G	G	C	T	T
IRIS_313-11160	NA	C	NA	NA	T	NA	NA	A	NA	T	NA	NA	A	NA	C	B 38::IRGC 34409-1::[IRIS 313-11160]	IRIS 313-11160	IRGC 127195	ind3	14	C	T	T	-	-	-	C	C	C	T	C	-	-	-	-	A	A	G	C	T	T	-	A	-	G	G	C	T	T
IRIS_313-11182	NA	C	NA	NA	T	NA	NA	A	NA	T	NA	NA	A	NA	C	CEMPO CINA::IRGC 35581-2::[IRIS 313-11182]	IRIS 313-11182	IRGC 128009	ind3	27	C	T	T	-	-	-	C	C	C	T	C	-	-	-	-	A	A	G	C	T	T	-	A	-	G	G	C	T	T
IRIS_313-11193	NA	C	NA	NA	T	NA	NA	A	NA	T	NA	NA	A	NA	C	GAHB AWY 2-1::IRGC 36549-2::[IRIS 313-11193]	IRIS 313-11193	IRGC 128040	ind3	18	C	T	T	-	-	-	C	C	C	T	C	-	-	-	-	A	A	G	C	T	T	-	A	-	G	G	C	T	T
IRIS_313-11203	NA	C	NA	NA	T	NA	NA	A	NA	T	NA	NA	A	NA	C	GOCHIAGARI::IRGC 37086-2::[IRIS 313-11203]	IRIS 313-11203	IRGC 128044	ind2	12	C	T	T	-	-	-	C	C	C	T	C	-	-	-	-	C	-	G	C	T	T	-	A	-	G	G	C	T	T
IRIS_313-11211	NA	C	NA	NA	T	NA	NA	A	NA	T	NA	NA	A	NA	C	KADAMSAIL::IRGC 37468-2::[IRIS 313-11211]	IRIS 313-11211	IRGC 128063	ind2	15	C	T	T	-	-	-	C	C	C	T	C	-	-	-	-	C	-	G	C	T	T	-	A	-	G	G	C	T	T
IRIS_313-11220	NA	C	NA	NA	T	NA	NA	A	NA	T	NA	NA	A	NA	C	CHITRAJ 14-134::IRGC 37837-2::[IRIS 313-11220]	IRIS 313-11220	IRGC 128015	ind2	25	C	T	T	-	-	-	C	C	C	T	C	-	-	-	-	C	-	G	C	T	T	-	A	-	G	G	C	T	T
IRIS_313-11221	NA	C	NA	NA	T	NA	NA	A	NA	T	NA	NA	A	NA	C	CYLINDRICAL 30-605::IRGC 37845-2::[IRIS 313-11221]	IRIS 313-11221	IRGC 128022	ind2	23	C	T	T	-	-	-	C	C	C	T	C	-	-	-	-	A	A	G	C	T	T	-	A	-	G	G	C	T	T
IRIS_313-11222	NA	C	NA	NA	T	NA	NA	A	NA	T	NA	NA	A	NA	C	DUDHSWAR 15-157::IRGC 37967-2::[IRIS 313-11222]	IRIS 313-11222	IRGC 132308	ind2	19	C	T	T	-	-	-	C	C	C	T	C	-	-	-	-	A	A	G	C	T	T	-	A	-	G	G	C	T	T
IRIS_313-11227	NA	C	NA	NA	T	NA	NA	A	NA	T	NA	NA	A	NA	C	SADAJIRA 19-317::IRGC 38344-2::[IRIS 313-11227]	IRIS 313-11227	IRGC 128154	ind2	25	C	T	T	-	-	-	C	C	C	T	C	-	-	-	-	C	-	G	C	T	T	-	A	-	G	G	C	T	T
IRIS_313-11229	NA	C	NA	NA	T	NA	NA	A	NA	T	NA	NA	A	NA	C	STRAW 23-428::IRGC 38416-2::[IRIS 313-11229]	IRIS 313-11229	IRGC 128171	ind2	29	C	T	T	-	-	-	C	C	C	T	C	-	-	-	-	A	A	G	C	T	T	-	A	-	G	G	C	T	T
IRIS_313-11230	NA	C	NA	NA	T	NA	NA	A	NA	T	NA	NA	A	NA	C	STRAW 23-438::IRGC 38426-2::[IRIS 313-11230]	IRIS 313-11230	IRGC 128172	ind2	26	C	T	T	-	-	-	C	C	C	T	C	-	-	-	-	A	A	G	C	T	T	-	A	-	G	G	C	T	T
IRIS_313-11231	NA	C	NA	NA	T	NA	NA	A	NA	T	NA	NA	A	NA	C	STRAW 23-471::IRGC 38456-1::[IRIS 313-11231]	IRIS 313-11231	IRGC 135799	ind2	21	C	T	T	-	-	-	C	C	C	T	C	-	-	-	-	A	A	G	C	T	T	-	A	-	G	G	C	T	T
IRIS_313-11234	NA	C	NA	NA	T	NA	NA	A	NA	T	NA	NA	A	NA	C	LIGUNGTUNG::IRGC 38786-1::[IRIS 313-11234]	IRIS 313-11234	IRGC 127563	indx	36	C	T	T	-	-	-	C	C	C	T	C	-	-	-	-	A	A	G	C	T	T	-	A	-	G	G	C	T	T
IRIS_313-11235	NA	C	NA	NA	T	NA	NA	A	NA	T	NA	NA	A	NA	C	PINILING DANIEL::IRGC 38828-2::[IRIS 313-11235]	IRIS 313-11235	IRGC 128137	indx	29	C	T	T	-	-	-	C	C	C	T	C	-	-	-	-	A	A	G	C	T	T	-	A	-	G	G	C	T	T
IRIS_313-11256	NA	C	NA	NA	T	NA	NA	A	NA	T	NA	NA	A	NA	C	ARC 12411::IRGC 41047-2::[IRIS 313-11256]	IRIS 313-11256	IRGC 127941	indx	29	C	T	T	-	-	-	C	C	C	T	C	-	-	-	-	A	A	G	C	T	T	-	A	-	G	G	C	T	T
IRIS_313-11262	NA	C	NA	NA	T	NA	NA	A	NA	T	NA	NA	A	NA	A/C	ARC 13888::IRGC 41288-2::[IRIS 313-11262]	IRIS 313-11262	IRGC 127952	indx	29	C	T	T	-	-	-	C	C	C	T	C	-	-	-	-	A	A	G	C	T	T	-	A	-	G	G	C	T	T
IRIS_313-11275	NA	C	NA	NA	T	NA	NA	A	NA	T	NA	NA	A	NA	C	ARC 14975::IRGC 41848-1::[IRIS 313-11275]	IRIS 313-11275	IRGC 127156	indx	29	C	T	T	-	-	-	C	C	C	T	C	-	-	-	-	A	A	G	C	T	T	-	A	-	G	G	C	T	T
IRIS_313-11277	NA	C	NA	NA	T	NA	NA	A	NA	T	NA	NA	A	NA	C	ARC 15129::IRGC 41938-1::[IRIS 313-11277]	IRIS 313-11277	IRGC 127157	aus	29	C	T	T	-	-	-	C	C	C	T	C	-	-	-	-	A	A	G	C	T	T	-	A	-	G	G	C	T	T
IRIS_313-11284	NA	C	NA	NA	T	NA	NA	A	NA	T	NA	NA	A	NA	C	ARC 18001::IRGC 42195-2::[IRIS 313-11284]	IRIS 313-11284	IRGC 135638	indx	20	C	T	T	-	-	-	C	C	C	T	C	-	-	-	-	C	-	G	C	T	T	-	A	-	G	G	C	T	T
IRIS_313-11299	NA	C	NA	NA	T	NA	NA	A	NA	T	NA	NA	A	NA	A	ARC 14299::IRGC 42889-2::[IRIS 313-11299]	IRIS 313-11299	IRGC 127954	indx	18	C	T	T	-	-	-	C	C	C	T	C	-	-	-	-	C	-	G	C	T	T	-	A	-	G	G	C	T	T
IRIS_313-11304	NA	C	NA	NA	T	NA	NA	A	NA	T	NA	NA	A	NA	C	ARC 15163::IRGC 43106-1::[IRIS 313-11304]	IRIS 313-11304	IRGC 127158	indx	16	C	T	T	-	-	-	C	C	C	T	C	-	-	-	-	A	A	G	C	T	T	-	A	-	G	G	C	T	T
IRIS_313-11305	NA	C	NA	NA	T	NA	NA	A	NA	T	NA	NA	A	NA	C	ARC 15373::IRGC 43166-2::[IRIS 313-11305]	IRIS 313-11305	IRGC 127964	indx	18	C	T	T	-	-	-	C	C	C	T	C	-	-	-	-	A	A	G	C	T	T	-	A	-	G	G	C	T	T
IRIS_313-11306	NA	C	NA	NA	T	NA	NA	A	NA	T	NA	NA	A	NA	C	ARC 15385::IRGC 43174-1::[IRIS 313-11306]	IRIS 313-11306	IRGC 127159	indx	13	C	T	T	-	-	-	C	C	C	T	C	-	-	-	-	C	-	G	C	T	T	-	A	-	G	G	C	T	T
IRIS_313-11309	NA	C	NA	NA	T	NA	NA	A	NA	T	NA	NA	A	NA	C	ARC 15862::IRGC 43242-1::[IRIS 313-11309]	IRIS 313-11309	IRGC 128229	indx	21	C	T	T	-	-	-	C	C	C	T	C	-	-	-	-	A	A	G	C	T	T	-	A	-	G	G	C	T	T
IRIS_313-11319	NA	C	NA	NA	T	NA	NA	A	NA	T	NA	NA	A	NA	C	KENCANA RANDAH::IRGC 43709-2::[IRIS 313-11319]	IRIS 313-11319		ind3	16	C	T	T	-	-	-	C	C	C	T	C	-	-	-	-	A	A	G	C	T	T	-	A	-	G	G	C	T	T
IRIS_313-11320	NA	C	NA	NA	T	NA	NA	A	NA	T	NA	NA	A	NA	C	MAYAS PUTIH::IRGC 43727-2::[IRIS 313-11320]	IRIS 313-11320		ind3	25	C	T	T	-	-	-	C	C	C	T	C	-	-	-	-	A	A	G	C	T	T	-	A	-	G	G	C	T	T
IRIS_313-11345	NA	C	NA	NA	T	NA	NA	A	NA	T	NA	NA	A	NA	C	WAGWAG::IRGC 44802-1::[IRIS 313-11345]	IRIS 313-11345	IRGC 127891	indx	23	C	T	T	-	-	-	C	C	C	T	C	-	-	-	-	A	A	G	C	T	T	-	A	-	G	G	C	T	T
IRIS_313-11347	NA	C	NA	NA	T	NA	NA	A	NA	T	NA	NA	A	NA	C	WAGWAG RAOIS::IRGC 44805-1::[IRIS 313-11347]	IRIS 313-11347	IRGC 127892	indx	19	C	T	T	-	-	-	C	C	C	T	C	-	-	-	-	C	-	G	C	T	T	-	A	-	G	G	C	T	T
IRIS_313-11358	NA	C	NA	NA	T	NA	NA	A	NA	T	NA	NA	A	NA	C	DADKHANI::IRGC 45454-2::[IRIS 313-11358]	IRIS 313-11358	IRGC 128023	ind2	18	C	T	T	-	-	-	C	C	C	T	C	-	-	-	-	A	A	G	C	T	T	-	A	-	G	G	C	T	T
IRIS_313-11359	NA	C	NA	NA	T	NA	NA	A	NA	T	NA	NA	A	NA	C	DAHARNAGRA::IRGC 45465-2::[IRIS 313-11359]	IRIS 313-11359	IRGC 128024	ind2	25	C	T	T	-	-	-	C	C	C	T	C	-	-	-	-	A	A	G	C	T	T	-	A	-	G	G	C	T	T
IRIS_313-11361	NA	C	NA	NA	T	NA	NA	A	NA	T	NA	NA	A	NA	C	KALIKALMA::IRGC 45996-2::[IRIS 313-11361]	IRIS 313-11361	IRGC 128067	ind2	22	C	T	T	-	-	-	C	C	C	T	C	-	-	-	-	A	A	G	C	T	T	-	A	-	G	G	C	T	T
IRIS_313-11365	NA	C	NA	NA	T	NA	NA	A	NA	T	NA	NA	A	NA	C	LANJALI::IRGC 46236-2::[IRIS 313-11365]	IRIS 313-11365	IRGC 128095	indx	29	C	T	T	-	-	-	C	C	C	T	C	-	-	-	-	A	A	G	C	T	T	-	A	-	G	G	C	T	T
IRIS_313-11372	NA	C	NA	NA	T	NA	NA	A	NA	T	NA	NA	A	NA	C	SUFALDHULA::IRGC 46698-2::[IRIS 313-11372]	IRIS 313-11372	IRGC 128173	ind2	28	C	T	T	-	-	-	C	C	C	T	C	-	-	-	-	A	A	G	C	T	T	-	A	-	G	G	C	T	T
IRIS_313-11377	NA	C	NA	NA	T	NA	NA	A	NA	T	NA	NA	A	NA	C	AMARILLO::IRGC 47120-1::[IRIS 313-11377]	IRIS 313-11377	IRGC 127119	indx	19	C	T	T	-	-	-	C	C	C	T	C	-	-	-	-	A	A	G	C	T	T	-	A	-	G	G	C	T	T
IRIS_313-11381	NA	C	NA	NA	T	NA	NA	A	NA	T	NA	NA	A	NA	C	LINANGAN::IRGC 47255-2::[IRIS 313-11381]	IRIS 313-11381	IRGC 132351	ind3	29	C	T	T	-	-	-	C	C	C	T	C	-	-	-	-	A	A	G	C	T	T	-	A	-	G	G	C	T	T
IRIS_313-11384	NA	C	NA	NA	T	NA	NA	A	NA	T	NA	NA	A	NA	C	CHIEM TONG NHAT 1::IRGC 47496-1::[IRIS 313-11384]	IRIS 313-11384	IRGC 127275	indx	19	C	T	T	-	-	-	C	C	C	T	C	-	-	-	-	C	-	G	C	T	T	-	A	-	G	G	C	T	T
IRIS_313-11391	NA	C	NA	NA	T	NA	NA	A	NA	T	NA	NA	A	NA	C	NIAW DAM::IRGC 48387-2::[IRIS 313-11391]	IRIS 313-11391	IRGC 132260	ind3	27	C	T	T	-	-	-	C	C	C	T	C	-	-	-	-	A	A	G	C	T	T	-	A	-	G	G	C	T	T
IRIS_313-11395	NA	C	NA	NA	T	NA	NA	A	NA	T	NA	NA	A	NA	C	INDO NO 13075::IRGC 48665-1::[IRIS 313-11395]	IRIS 313-11395	IRGC 135755	ind3	29	C	T	T	-	-	-	C	C	C	T	C	-	-	-	-	A	A	G	C	T	T	-	A	-	G	G	C	T	T
IRIS_313-11400	NA	C	NA	NA	T	NA	NA	A	NA	T	NA	NA	A	NA	C	ECHORSAIL::IRGC 49182-1::[IRIS 313-11400]	IRIS 313-11400		indx	21	C	T	T	-	-	-	C	C	C	T	C	-	-	-	-	A	A	G	C	T	T	-	A	-	G	G	C	T	T
IRIS_313-11404	NA	C	NA	NA	T	NA	NA	A	NA	T	NA	NA	A	NA	C	AMON 4::IRGC 49375-2::[IRIS 313-11404]	IRIS 313-11404	IRGC 127925	ind2	25	C	T	T	-	-	-	C	C	C	T	C	-	-	-	-	C	-	G	C	T	T	-	A	-	G	G	C	T	T
IRIS_313-11406	NA	C	NA	NA	T	NA	NA	A	NA	T	NA	NA	A	NA	C	A 28-6::IRGC 49409-2::[IRIS 313-11406]	IRIS 313-11406	IRGC 127921	ind3	27	C	T	T	-	-	-	C	C	C	T	C	-	-	-	-	A	A	G	C	T	T	-	A	-	G	G	C	T	T
IRIS_313-11409	NA	C	NA	NA	T	NA	NA	A	NA	T	NA	NA	A	NA	C	CUTTACK 29::IRGC 49573-1::[IRIS 313-11409]	IRIS 313-11409	IRGC 127289	ind2	13	C	T	T	-	-	-	C	C	C	T	C	-	-	-	-	A	A	G	C	T	T	-	A	-	G	G	C	T	T
IRIS_313-11421	NA	C	NA	NA	T	NA	NA	A	NA	T	NA	NA	A	NA	C	TULASIBAS::IRGC 50192-2::[IRIS 313-11421]	IRIS 313-11421	IRGC 128196	ind2	13	C	T	T	-	-	-	C	C	C	T	C	-	-	-	-	A	A	G	C	T	T	-	A	-	G	G	C	T	T
IRIS_313-11437	NA	C	NA	NA	T	NA	NA	A	NA	T	NA	NA	A	NA	C	CAMPECHE A 79::IRGC 51102-1::[IRIS 313-11437]	IRIS 313-11437	IRGC 127246	ind1B	16	C	T	T	-	-	-	C	C	C	T	C	-	-	-	-	A	A	G	C	T	T	-	A	-	G	G	C	T	T
IRIS_313-11445	NA	C	NA	NA	T	NA	NA	A	NA	T	NA	NA	A	NA	C	NCS 102::IRGC 51854-1::[IRIS 313-11445]	IRIS 313-11445	IRGC 127653	ind2	14	C	T	T	-	-	-	C	C	C	T	C	-	-	-	-			G	C	T	T	-	A	-	G	G	C	T	T
IRIS_313-11453	NA	C	NA	NA	T	NA	NA	A	NA	T	NA	NA	A	NA	C	ZINYA KOLAMBA::IRGC 52402-1::[IRIS 313-11453]	IRIS 313-11453	IRGC 127916	ind2	29	C	T	T	-	-	-	C	C	C	T	C	-	-	-	-	A	A	G	C	T	T	-	A	-	G	G	C	T	T
IRIS_313-11460	NA	C	NA	NA	T	NA	NA	A	NA	T	NA	NA	A	NA	C	SELHI::IRGC 52760-1::[IRIS 313-11460]	IRIS 313-11460	IRGC 127792	ind2	29	C	T	T	-	-	-	C	C	C	T	C	-	-	-	-	A	A	G	C	T	T	-	A	-	G	G	C	T	T
IRIS_313-11461	NA	C	NA	NA	T	NA	NA	A	NA	T	NA	NA	A	NA	A	VAIKATHARYAN::IRGC 52805-1::[IRIS 313-11461]	IRIS 313-11461	IRGC 127881	ind2	28	C	T	T	-	-	-	C	C	C	T	C	-	-	-	-	A	A	G	C	T	T	-	A	-	G	G	C	T	T
IRIS_313-11463	NA	C	NA	NA	T	NA	NA	A	NA	T	NA	NA	A	NA	C	KATSIYAM TABAO::IRGC 52855-1::[IRIS 313-11463]	IRIS 313-11463	IRGC 127499	indx	23	C	T	T	-	-	-	C	C	C	T	C	-	-	-	-	A	A	G	C	T	T	-	A	-	G	G	C	T	T
IRIS_313-11497	NA	C	NA	NA	T	NA	NA	A	NA	T	NA	NA	A	NA	C	PADI ARA::IRGC 54252-2::[IRIS 313-11497]	IRIS 313-11497	IRGC 135630	ind2	19	C	T	T	-	-	-	C	C	C	T	C	-	-	-	-	A	A	G	C	T	T	-	A	-	G	G	C	T	T
IRIS_313-11500	NA	C	NA	NA	T	NA	NA	A	NA	T	NA	NA	A	NA	C	SKK::IRGC 54356-1::[IRIS 313-11500]	IRIS 313-11500	IRGC 127816	ind2	18	C	T	T	-	-	-	C	C	C	T	C	-	-	-	-	A	A	G	C	T	T	-	A	-	G	G	C	T	T
IRIS_313-11505	NA	C	NA	NA	T	NA	NA	A	NA	T	NA	NA	A	NA	C	K 1074::IRGC 55017-1::[IRIS 313-11505]	IRIS 313-11505	IRGC 127469	ind2	20	C	T	T	-	-	-	C	C	C	T	C	-	-	-	-	A	A	G	C	T	T	-	A	-	G	G	C	T	T
IRIS_313-11507	NA	C	NA	NA	T	NA	NA	A	NA	T	NA	NA	A	NA	C	TV 30::IRGC 55221-1::[IRIS 313-11507]	IRIS 313-11507	IRGC 127870	ind1B	19	C	T	T	-	-	-	C	C	C	T	C	-	-	-	-	A	A	G	C	T	T	-	A	-	G	G	C	T	T
IRIS_313-11509	NA	C	NA	NA	T	NA	NA	A	NA	T	NA	NA	A	NA	C	PRADOO DAENG::IRGC 55265-1::[IRIS 313-11509]	IRIS 313-11509	IRGC 132035	ind3	12	C	T	T	-	-	-	C	C	C	T	C	-	-	-	-	A	A	G	C	T	T	-	A	-	G	G	C	T	T
IRIS_313-11512	NA	C	NA	NA	T	NA	NA	A	NA	T	NA	NA	A	NA	C	OYAK PAKANG::IRGC 55422-1::[IRIS 313-11512]	IRIS 313-11512	IRGC 127693	indx	26	C	T	T	-	-	-	C	C	C	T	C	-	-	-	-	A	A	G	C	T	T	-	A	-	G	G	C	T	T
IRIS_313-11516	NA	C	NA	NA	T	NA	NA	A	NA	T	NA	NA	A	NA	C	IR 3839-1::IRGC 55946-1::[IRIS 313-11516]	IRIS 313-11516	IRGC 127437	indx	29	C	T	T	-	-	-	C	C	C	T	C	-	-	-	-	A	A	G	C	T	T	-	A	-	G	G	C	T	T
IRIS_313-11523	NA	C	NA	NA	T	NA	NA	A	NA	T	NA	NA	A	NA	C	ADIALLO::IRGC 56264-1::[IRIS 313-11523]	IRIS 313-11523	IRGC 127106	indx	20	C	T	T	-	-	-	C	C	C	T	C	-	-	-	-	A	A	G	C	T	T	-	A	-	G	G	C	T	T
IRIS_313-11534	NA	C	NA	NA	T	NA	NA	A	NA	T	NA	NA	A	NA	C	NAHNG KHAO BOW::IRGC 57377-1::[IRIS 313-11534]	IRIS 313-11534		ind3	16	C	T	T	-	-	-	C	C	C	T						C	-	G	C	T	T	-	A	-	G	G	C	T	T
IRIS_313-11541	NA	C	NA	NA	T	NA	NA	A	NA	T	NA	NA	A	NA	C	HOE PHAR THAE::IRGC 57907-1::[IRIS 313-11541]	IRIS 313-11541	IRGC 127410	indx	23	C	T	T	-	-	-	C	C	C	T	C	-	-	-	-	A	A	G	C	T	T	-	A	-	G	G	C	T	T
IRIS_313-11546	NA	C	NA	NA	T	NA	NA	A	NA	T	NA	NA	A	NA	C	NGA CHAN HMWE::IRGC 58146-1::[IRIS 313-11546]	IRIS 313-11546	IRGC 127672	indx	27	C	T	T	-	-	-	C	C	C	T	C	-	-	-	-	A	A	G	C	T	T	-	A	-	G	G	C	T	T
IRIS_313-11547	NA	C	NA	NA	T	NA	NA	A	NA	T	NA	NA	A	NA	C	SHWE SABA::IRGC 58206-1::[IRIS 313-11547]	IRIS 313-11547	IRGC 135580	indx	37	C	T	T	-	-	-	C	C	C	T	C	-	-	-	-	A	A	G	C	T	T	-	A	-	G	G	C	T	T
IRIS_313-11567	NA	C	NA	NA	T	NA	NA	A	NA	T	NA	NA	A	NA	C	RATO BASMATI::IRGC 59205-1::[IRIS 313-11567]	IRIS 313-11567	IRGC 127766	aro	29	C	T	T	-	-	-	C	C	C	T	C	-	-	-	-	A	A	G	C	T	T	-	A	-	G	G	C	T	T
IRIS_313-11573	NA	C	NA	NA	T	NA	NA	A	NA	T	NA	NA	A	NA	C	GAO LIANG ZAO::IRGC 59563-1::[IRIS 313-11573]	IRIS 313-11573	IRGC 127379	indx	22	C	T	T	-	-	-	C	C	C	T	C	-	-	-	-	C	-	G	C	T	T	-	A	-	G	G	C	T	T
IRIS_313-11576	NA	C	NA	NA	T	NA	NA	A	NA	T	NA	NA	A	NA	C	JIANG HUI DAO::IRGC 59688-1::[IRIS 313-11576]	IRIS 313-11576	IRGC 127459	indx	20	C	T	T	-	-	-	C	C	C	T	C	-	-	-	-	A	A	G	C	T	T	-	A	-	G	G	C	T	T
IRIS_313-11580	NA	C	NA	NA	T	NA	NA	A	NA	T	NA	NA	A	NA	C	TAI ZHOU XIAN::IRGC 59912-1::[IRIS 313-11580]	IRIS 313-11580	IRGC 127840	indx	27	C	T	T	-	-	-	C	C	C	T	C	-	-	-	-	A	A	G	C	T	T	-	A	-	G	G	C	T	T
IRIS_313-11591	NA	C	NA	NA	T	NA	NA	A	NA	T	NA	NA	A	NA	C	PULUT MERAH 2::IRGC 60427-1::[IRIS 313-11591]	IRIS 313-11591	IRGC 132293	admix	29	C	T	T	-	-	-	C	C	C	T	C	-	-	-	-	A	A	G	C	T	T	-	A	-	G	G	C	T	T
IRIS_313-11599	NA	C	NA	NA	T	NA	NA	A	NA	T	NA	NA	A	NA	C	JUGRAY::IRGC 60960-1::[IRIS 313-11599]	IRIS 313-11599	IRGC 127468	ind2	26	C	T	T	-	-	-	C	C	C	T	C	-	-	-	-	A	A	G	C	T	T	-	A	-	G	G	C	T	T
IRIS_313-11615	NA	C	NA	NA	T	NA	NA	A	NA	T	NA	NA	A	NA	C	MANARE (PHOM)::IRGC 61437-1::[IRIS 313-11615]	IRIS 313-11615	IRGC 132408	ind3	29	C	T					C	C	C	T	C	-	-	-	-	A	A	G	C	T	T	-	A	-	G	G	C	T	T
IRIS_313-11635	NA	C	NA	NA	T	NA	NA	A	NA	T	NA	NA	A	NA	C	GAM PERNG::IRGC 62135-1::[IRIS 313-11635]	IRIS 313-11635	IRGC 128294	ind3	37	C	T	T	-	-	-	C	C	C	T	C	-	-	-	-	A	A	G	C	T	T	-	A	-	G	G	C	T	T
IRIS_313-11641	NA	C	NA	NA	T	NA	NA	A	NA	T	NA	NA	A	NA	C	NCS 477::IRGC 62299-1::[IRIS 313-11641]	IRIS 313-11641	IRGC 127659	ind2	19	C	T	T	-	-	-	C	C	C	T	C	-	-	-	-	A	A	G	C	T	T	-	A	-	G	G	C	T	T
IRIS_313-11683	NA	C	NA	NA	T	NA	NA	A	NA	T	NA	NA	A	NA	C	NIAW KHIAW NGOO::IRGC 64563-1::[IRIS 313-11683]	IRIS 313-11683	IRGC 127677	ind3	29	C	T	T	-	-	-	C	C	C	T	C	-	-	-	-	A	A	G	C	T	T	-	A	-	G	G	C	T	T
IRIS_313-11685	NA	C	NA	NA	T	NA	NA	A	NA	T	NA	NA	A	NA	C	PLAWNG SAENG::IRGC 64595-1::[IRIS 313-11685]	IRIS 313-11685	IRGC 127735	ind3	32	C	T	T	-	-	-	C	C	C	T	C	-	-	-	-	A	A	G	C	T	T	-	A	-	G	G	C	T	T
IRIS_313-11700	NA	C	NA	NA	T	NA	NA	A	NA	T	NA	NA	A	NA	C	DAW NOK KAEN::IRGC 65548-1::[IRIS 313-11700]	IRIS 313-11700	IRGC 127306	ind3	32	C	T	T	-	-	-	C	C	C	T	C	-	-	-	-	A	A	G	C	T	T	-	A	-	G	G	C	T	T
IRIS_313-11707	NA	C	NA	NA	T	NA	NA	A	NA	T	NA	NA	A	NA	C	KHAO SAHKORN::IRGC 65948-1::[IRIS 313-11707]	IRIS 313-11707	IRGC 132403	ind3	29	C	T	T	-	-	-	C	C	C	T	C	-	-	-	-	A	A	G	C	T	T	-	A	-	G	G	C	T	T
IRIS_313-11709	NA	C	NA	NA	T	NA	NA	A	NA	T	NA	NA	A	NA	C	LEUANG KHAJAWN::IRGC 66014-1::[IRIS 313-11709]	IRIS 313-11709	IRGC 132010	ind3	29	C	T	T	-	-	-	C	C	C	T	C	-	-	-	-	A	A	G	C	T	T	-	A	-	G	G	C	T	T
IRIS_313-11729	NA	C	NA	NA	T	NA	NA	A	NA	T	NA	NA	A	NA	C	MEI LIU ZAO 5::IRGC 67231-1::[IRIS 313-11729]	IRIS 313-11729	IRGC 127622	indx	21	C	T	T	-	-	-	C	C	C	T	C	-	-	-	-	A	A	G	C	T	T	-	A	-	G	G	C	T	T
IRIS_313-11731	NA	C	NA	NA	T	NA	NA	A	NA	T	NA	NA	A	NA	C	QING TAI AI::IRGC 67273-1::[IRIS 313-11731]	IRIS 313-11731	IRGC 127754	indx	37	C	T	T	-	-	-	C	C	C	T	C	-	-	-	-	A	A	G	C	T	T	-	A	-	G	G	C	T	T
IRIS_313-11735	NA	C	NA	NA	T	NA	NA	A	NA	T	NA	NA	A	NA	C	YI LI ZHONG::IRGC 67382-1::[IRIS 313-11735]	IRIS 313-11735	IRGC 127904	indx	17	C	T	T	-	-	-	C	C	C	T	C	-	-	-	-	A	A	G	C	T	T	-	A	-	G	G	C	T	T
IRIS_313-11740	NA	C	NA	NA	T	NA	NA	A	NA	T	NA	NA	A	NA	C	UGAGA::IRGC 67604-1::[IRIS 313-11740]	IRIS 313-11740	IRGC 127872	indx	29	C	T	T	-	-	-	C	C	C	T	C	-	-	-	-	A	A	G	C	T	T	-	A	-	G	G	C	T	T
IRIS_313-11750	NA	C	NA	NA	T	NA	NA	A	NA	T	NA	NA	A	NA	C	L 10595::IRGC 68109-1::[IRIS 313-11750]	IRIS 313-11750	IRGC 127538	indx	29	C	T	T	-	-	-	C	C	C	T	C	-	-	-	-	A	A	G	C	T	T	-	A	-	G	G	C	T	T
IRIS_313-11758	NA	C	NA	NA	T	NA	NA	A	NA	T	NA	NA	A	NA	C	FOFFI::IRGC 68438-1::[IRIS 313-11758]	IRIS 313-11758	IRGC 131987	ind2	37	C	T	T	-	-	-	C	C	C	T	C	-	-	-	-	A	A	G	C	T	T	-	A	-	G	G	C	T	T
IRIS_313-11760	NA	C	NA	NA	T	NA	NA	A	NA	T	NA	NA	A	NA	C	MENAHARA 505::IRGC 68709-1::[IRIS 313-11760]	IRIS 313-11760	IRGC 127623	ind2	29	C	T	T	-	-	-	C	C	C	T	C	-	-	-	-	A	A	G	C	T	T	-	A	-	G	G	C	T	T
IRIS_313-11761	NA	C	NA	NA	T	NA	NA	A	NA	T	NA	NA	A	NA	C	NS 199::IRGC 68864-1::[IRIS 313-11761]	IRIS 313-11761	IRGC 127683	ind2	23	C	T	T	-	-	-	C	C	C	T	C	-	-	-	-	A	A	G	C	T	T	-	A	-	G	G	C	T	T
IRIS_313-11762	NA	C	NA	NA	T	NA	NA	A	NA	T	NA	NA	A	NA	C	NS 1515::IRGC 68947-1::[IRIS 313-11762]	IRIS 313-11762	IRGC 127682	ind2	23	C	T	T	-	-	-	C	C	C	T	C	-	-	-	-	A	A	G	C	T	T	-	A	-	G	G	C	T	T
IRIS_313-11764	NA	C	NA	NA	T	NA	NA	A	NA	T	NA	NA	A	NA	C	P 41::IRGC 68987-1::[IRIS 313-11764]	IRIS 313-11764	IRGC 127697	ind3	29	C	T	T	-	-	-	C	C	C	T	C	-	-	-	-	A	A	G	C	T	T	-	A	-	G	G	C	T	T
IRIS_313-11794	NA	C	NA	NA	T	NA	NA	A	NA	T	NA	NA	A	NA	C	TSIPALA MENAHAR::IRGC 69979-1::[IRIS 313-11794]	IRIS 313-11794	IRGC 127867	ind2	37	C	T	T	-	-	-	C	C	C	T	C	-	-	-	-	A	A	G	C	T	T	-	A	-	G	G	C	T	T
IRIS_313-11817	NA	C	NA	NA	T	NA	NA	A	NA	T	NA	NA	A	NA	C	KHAOSAING::IRGC 70746-2::[IRIS 313-11817]	IRIS 313-11817	IRGC 128085	indx	27	C	T	T	-	-	-	C	C	C	T	C	-	-	-	-	A	A	G	C	T	T	-	A	-	G	G	C	T	T
IRIS_313-11823	NA	C	NA	NA	T	NA	NA	A	NA	T	NA	NA	A	NA	C	BHU BHUSI::IRGC 70803-1::[IRIS 313-11823]	IRIS 313-11823	IRGC 127223	ind2	37	C	T	T	-	-	-	C	C	C	T	C	-	-	-	-	A	A	G	C	T	T	-	A	-	G	G	C	T	T
IRIS_313-11825	NA	C	NA	NA	T	NA	NA	A	NA	T	NA	NA	A	NA	C	HANSRAJ::IRGC 70836-1::[IRIS 313-11825]	IRIS 313-11825	IRGC 135753	aro	29	C	T	T	-	-	-	C	C	C	T	C	-	-	-	-	A	A	G	C	T	T	-	A	-	G	G	C	T	T
IRIS_313-11826	NA	C	NA	NA	T	NA	NA	A	NA	T	NA	NA	A	NA	C	HIRA NAKHI::IRGC 70840-1::[IRIS 313-11826]	IRIS 313-11826	IRGC 128309	aro	20	C	T	T	-	-	-	C	C	C	T	C	-	-	-	-			G	C	T	T	-	A	-	G	G	C	T	T
IRIS_313-11850	NA	C	NA	NA	T	NA	NA	A	NA	T	NA	NA	A	NA	C	SESAT JADI::IRGC 71834-1::[IRIS 313-11850]	IRIS 313-11850	IRGC 132041	ind3	24	C	T	T	-	-	-	C	C	C	T	C	-	-	-	-	A	A	G	C	T	T	-	A	-	G	G	C	T	T
IRIS_313-11852	NA	C	NA	NA	T	NA	NA	A	NA	T	NA	NA	A	NA	C	BAI MI ZAI 7::IRGC 71940-1::[IRIS 313-11852]	IRIS 313-11852	IRGC 127202	ind1A	25	C	T	T	-	-	-	C	C	C	T	C	-	-	-	-	C	-	G	C	T	T	-	A	-	G	G	C	T	T
IRIS_313-11868	NA	C	NA	NA	T	NA	NA	A	NA	T	NA	NA	A	NA	C	LIU LI YOU::IRGC 72198-1::[IRIS 313-11868]	IRIS 313-11868	IRGC 127569	ind1A	18	C	T	T	-	-	-	C	C	C	T	C	-	-	-	-	A	A	G	C	T	T	-	A	-	G	G	C	T	T
IRIS_313-11881	NA	C	NA	NA	T	NA	NA	A	NA	T	NA	NA	A	NA	C	LIU TIAO XIAN::IRGC 72758-1::[IRIS 313-11881]	IRIS 313-11881	IRGC 127570	ind1A	20	C	T	T	-	-	-	C	C	C	T	C	-	-	-	-	A	A	G	C	T	T	-	A	-	G	G	C	T	T
IRIS_313-11884	NA	C	NA	NA	T	NA	NA	A	NA	T	NA	NA	A	NA	C	TIAN DAO DAO::IRGC 72837-1::[IRIS 313-11884]	IRIS 313-11884	IRGC 127857	ind1A	26	C	T	T	-	-	-	C	C	C	T	C	-	-	-	-	C	-	G	C	T	T	-	A	-	G	G	C	T	T
IRIS_313-11894	NA	C	NA	NA	T	NA	NA	A	NA	T	NA	NA	A	NA	C	LOC TRANG MUON::IRGC 73216-1::[IRIS 313-11894]	IRIS 313-11894	IRGC 128368	indx	25	C	T	T	-	-	-	C	C	C	T	C	-	-	-	-	A	A	G	C	T	T	-	A	-	G	G	C	T	T
IRIS_313-11904	NA	C	NA	NA	T	NA	NA	A	NA	T	NA	NA	A	NA	C	PADI SIRANDAH KUNING::IRGC 73762-1::[IRIS 313-11904]	IRIS 313-11904	IRGC 132287	ind3	28	C	T	T	-	-	-	C	C	C	T	C	-	-	-	-	A	A	G	C	T	T	-	A	-	G	G	C	T	T
IRIS_313-11910	NA	C	NA	NA	T	NA	NA	A	NA	T	NA	NA	A	NA	C	YU HE HONG::IRGC 74266-1::[IRIS 313-11910]	IRIS 313-11910	IRGC 127907	indx	21	C	T	T	-	-	-	C	C	C	T	C	-	-	-	-	A	A	G	C	T	T	-	A	-	G	G	C	T	T
IRIS_313-11911	NA	C	NA	NA	T	NA	NA	A	NA	T	NA	NA	A	NA	C	YUN NAN ZHAN::IRGC 74272-1::[IRIS 313-11911]	IRIS 313-11911	IRGC 127908	ind1A	20	C	T	T	-	-	-	C	C	C	T	C	-	-	-	-	A	A	G	C	T	T	-	A	-	G	G	C	T	T
IRIS_313-11920	NA	C	NA	NA	T	NA	NA	A	NA	T	NA	NA	A	NA	C	GI TAH::IRGC 74883-1::[IRIS 313-11920]	IRIS 313-11920	IRGC 127386	indx	23	C	T	T	-	-	-	C	C	C	T	C	-	-	-	-	A	A	G	C	T	T	-	A	-	G	G	C	T	T
IRIS_313-11921	NA	C	NA	NA	T	NA	NA	A	NA	T	NA	NA	A	NA	C	KHAO GAHB BUA::IRGC 74937-1::[IRIS 313-11921]	IRIS 313-11921	IRGC 132401	ind3	29	C	T	T	-	-	-	C	C	C	T	C	-	-	-	-	A	A	G	C	T	T	-	A	-	G	G	C	T	T
IRIS_313-11939	NA	C	NA	NA	T	NA	NA	A	NA	T	NA	NA	A	NA	C	KAMPTI::IRGC 75626-1::[IRIS 313-11939]	IRIS 313-11939	IRGC 127484	ind3	19	C	T	T	-	-	-	C	C	C	T	C	-	-	-	-	A	A	G	C	T	T	-	A	-	G	G	C	T	T
IRIS_313-11948	NA	C	NA	NA	T	NA	NA	A	NA	T	NA	NA	A	NA	C	HOU LU BAI::IRGC 76582-1::[IRIS 313-11948]	IRIS 313-11948	IRGC 127417	ind1A	19	C	T	T	-	-	-	C	C	C	T	C	-	-	-	-	A	A	G	C	T	T	-	A	-	G	G	C	T	T
IRIS_313-11949	NA	C	NA	NA	T	NA	NA	A	NA	T	NA	NA	A	NA	C	LIU HE XI HE::IRGC 76661-1::[IRIS 313-11949]	IRIS 313-11949	IRGC 127568	ind1A	22	C	T	T	-	-	-	C	C	C	T	C	-	-	-	-	C	-	G	C	T	T	-	A	-	G	G	C	T	T
IRIS_313-11950	NA	C	NA	NA	T	NA	NA	A	NA	T	NA	NA	A	NA	C	MI GU::IRGC 76687-1::[IRIS 313-11950]	IRIS 313-11950	IRGC 127626	ind1A	23	C	T	T	-	-	-	C	C	C	T	C	-	-	-	-	A	A	G	C	T	T	-	A	-	G	G	C	T	T
IRIS_313-11952	NA	C	NA	NA	T	NA	NA	A	NA	T	NA	NA	A	NA	C	QI YUE ZHAN::IRGC 76722-1::[IRIS 313-11952]	IRIS 313-11952	IRGC 127756	ind1A	20	C	T	T	-	-	-	C	C	C	T	C	-	-	-	-	A	A	G	C	T	T	-	A	-	G	G	C	T	T
IRIS_313-11954	NA	C	NA	NA	T	NA	NA	A	NA	T	NA	NA	A	NA	C	XIA HONG GU::IRGC 76803-1::[IRIS 313-11954]	IRIS 313-11954	IRGC 128504	ind1A	17	C	T	T	-	-	-	C	C	C	T	C	-	-	-	-	C	-	G	C	T	T	-	A	-	G	G	C	T	T
IRIS_313-11957	NA	C	NA	NA	T	NA	NA	A	NA	T	NA	NA	A	NA	C	DAW LUEY 4-3::IRGC 76929-1::[IRIS 313-11957]	IRIS 313-11957	IRGC 127305	indx	22	C	T	T	-	-	-	C	C	C	T	C	-	-	-	-	A	A	G	C	T	T	-	A	-	G	G	C	T	T
IRIS_313-11960	NA	C	NA	NA	T	NA	NA	A	NA	T	NA	NA	A	NA	C	PORONG::IRGC 76983-1::[IRIS 313-11960]	IRIS 313-11960	IRGC 127740	ind1B	14	C	T	T	-	-	-	C	C	C	T	C	-	-	-	-	C	-	G	C	T	T	-	A	-	G	G	C	T	T
IRIS_313-11962	NA	C	NA	NA	T	NA	NA	A	NA	T	NA	NA	A	NA	C	KHAO SETTI::IRGC 77084-1::[IRIS 313-11962]	IRIS 313-11962	IRGC 132002	ind3	27	C	T	T	-	-	-	C	C	C	T	C	-	-	-	-	A	A	G	C	T	T	-	A	-	G	G	C	T	T
IRIS_313-11983	NA	C	NA	NA	T	NA	NA	A	NA	T	NA	NA	A	NA	C	KERIBAREFOR::IRGC 78454-1::[IRIS 313-11983]	IRIS 313-11983	IRGC 128337	ind2	21	C	T	T	-	-	-	C	C	C	T	C	-	-	-	-	A	A	G	C	T	T	-	A	-	G	G	C	T	T
IRIS_313-11999	NA	C	NA	NA	T	NA	NA	A	NA	T	NA	NA	A	NA	C	KAUN TREI::IRGC 79194-1::[IRIS 313-11999]	IRIS 313-11999	IRGC 132281	ind3	29	C	T	T	-	-	-	C	C	C	T	C	-	-	-	-	A	A	G	C	T	T	-	A	-	G	G	C	T	T
IRIS_313-12010	NA	C	NA	NA	T	NA	NA	A	NA	T	NA	NA	A	NA	C	YAN ZHAN::IRGC 79740-1::[IRIS 313-12010]	IRIS 313-12010	IRGC 127900	ind1A	23	C	T	T	-	-	-	C	C	C	T	C	-	-	-	-	A	A	G	C	T	T	-	A	-	G	G	C	T	T
IRIS_313-12017	NA	C	NA	NA	T	NA	NA	A	NA	T	NA	NA	A	NA	C	EX SANDEMA::IRGC 79964-1::[IRIS 313-12017]	IRIS 313-12017	IRGC 127364	indx	18	C	T	T	-	-	-	C	C	C	T	C	-	-	-	-	A	A	G	C	T	T	-	A	-	G	G	C	T	T
IRIS_313-12027	NA	C	NA	NA	T	NA	NA	A	NA	T	NA	NA	A	NA	C	ACEH (SELECTION)::IRGC 80233-1::[IRIS 313-12027]	IRIS 313-12027	IRGC 131962	ind3	19	C	T	T	-	-	-	C	C	C	T	C	-	-	-	-	A	A	G	C	T	T	-	A	-	G	G	C	T	T
IRIS_313-12047	NA	C	NA	NA	T	NA	NA	A	NA	T	NA	NA	A	NA	C	LEMAK RUSA::IRGC 81486-1::[IRIS 313-12047]	IRIS 313-12047	IRGC 132008	ind3	16	C	T	T	-	-	-	C	C	C	T	C	-	-	-	-	A	A	G	C	T	T	-	A	-	G	G	C	T	T
IRIS_313-12048	NA	C	NA	NA	T	NA	NA	A	NA	T	NA	NA	A	NA	C	LIMA::IRGC 81487-1::[IRIS 313-12048]	IRIS 313-12048	IRGC 127564	ind3	23	C	T	T	-	-	-	C	C	C	T	C	-	-	-	-	A	A	G	C	T	T	-	A	-	G	G	C	T	T
IRIS_313-12049	NA	C	NA	NA	T	NA	NA	A	NA	T	NA	NA	A	NA	C	MAE HANG::IRGC 81615-2::[IRIS 313-12049]	IRIS 313-12049	IRGC 132352	ind3	15	C	T	T	-	-	-	C	C	C	T	C	-	-	-	-	A	A	G	C	T	T	-	A	-	G	G	C	T	T
IRIS_313-12050	NA	C	NA	NA	T	NA	NA	A	NA	T	NA	NA	A	NA	C	SHAN KAUK HNYIN::IRGC 81656-1::[IRIS 313-12050]	IRIS 313-12050	IRGC 128468	indx	9	C	T	T	-	-	-	C	C	C	T	C	-	-	-	-			G	C	T	T	-	A	-	G	G	C	T	T
IRIS_313-12052	NA	C	NA	NA	T	NA	NA	A	NA	T	NA	NA	A	NA	C	ADUKKAN::IRGC 81783-1::[IRIS 313-12052]	IRIS 313-12052	IRGC 127109	indx	22	C	T	T	-	-	-	C	C	C	T	C	-	-	-	-	A	A	G	C	T	T	-	A	-	G	G	C	T	T
IRIS_313-12067	NA	C	NA	NA	T	NA	NA	A	NA	T	NA	NA	A	NA	C	531::IRGC 82643-1::[IRIS 313-12067]	IRIS 313-12067	IRGC 127100	indx	16	C	T	T	-	-	-	C	C	C	T	C	-	-	-	-	A	A	G	C	T	T	-	A	-	G	G	C	T	T
IRIS_313-12081	NA	C	NA	NA	T	NA	NA	A	NA	T	NA	NA	A	NA	C	1146::IRGC 83068-1::[IRIS 313-12081]	IRIS 313-12081	IRGC 128208	ind3	14	C	T	T	-	-	-	C	C	C	T	C	-	-	-	-	A	A	G	C	T	T	-	A	-	G	G	C	T	T
IRIS_313-12082	NA	C	NA	NA	T	NA	NA	A	NA	T	NA	NA	A	NA	C	MAVOLATSIKA::IRGC 83137-1::[IRIS 313-12082]	IRIS 313-12082	IRGC 127614	ind2	21	C	T	T	-	-	-	C	C	C	T	C	-	-	-	-	A	A	G	C	T	T	-	A	-	G	G	C	T	T
IRIS_313-12083	NA	C	NA	NA	T	NA	NA	A	NA	T	NA	NA	A	NA	C	SARIN TSIPALA::IRGC 83154-1::[IRIS 313-12083]	IRIS 313-12083	IRGC 128460	ind2	29	C	T	T	-	-	-	C	C	C	T	C	-	-	-	-	A	A	G	C	T	T	-	A	-	G	G	C	T	T
IRIS_313-12097	NA	C	NA	NA	T	NA	NA	A	NA	T	NA	NA	A	NA	C	NEANG MINH::IRGC 83897-1::[IRIS 313-12097]	IRIS 313-12097	IRGC 135778	ind3	21	C	T	T	-	-	-	C	C	C	T	C	-	-	-	-	A	A	G	C	T	T	-	A	-	G	G	C	T	T
IRIS_313-12121	NA	C	NA	NA	T	NA	NA	A	NA	T	NA	NA	A	NA	C	CHA LIENG::IRGC 84920-1::[IRIS 313-12121]	IRIS 313-12121	IRGC 127254	ind3	29	C	T	T	-	-	-	C	C	C	T	C	-	-	-	-	A	A	G	C	T	T	-	A	-	G	G	C	T	T
IRIS_313-12131	NA	C	NA	NA	T	NA	NA	A	NA	T	NA	NA	A	NA	C	LG 944::IRGC 86000-1::[IRIS 313-12131]	IRIS 313-12131	IRGC 132011	ind3	26	C	T	T	-	-	-	C	C	C	T	C	-	-	-	-	A	A	G	C	T	T	-	A	-	G	G	C	T	T
IRIS_313-12133	NA	C	NA	NA	T	NA	NA	A	NA	T	NA	NA	A	NA	C	TAP KHOUAY::IRGC 86373-1::[IRIS 313-12133]	IRIS 313-12133	IRGC 127849	ind3	19	C	T	T	-	-	-	C	C	C	T	C	-	-	-	-	A	A	G	C	T	T	-	A	-	G	G	C	T	T
IRIS_313-12143	NA	C	NA	NA	T	NA	NA	A	NA	T	NA	NA	A	NA	C	SRAU KHGNAERNG::IRGC 87073-1::[IRIS 313-12143]	IRIS 313-12143	IRGC 132300	ind3	15	C	T	T	-	-	-	C	C	C	T	C	-	-	-	-	A	A	G	C	T	T	-	A	-	G	G	C	T	T
IRIS_313-12148	NA	C	NA	NA	T	NA	NA	A	NA	T	NA	NA	A	NA	C	ARN'-SAR THNGORN'::IRGC 87205-1::[IRIS 313-12148]	IRIS 313-12148	IRGC 127172	ind3	6	C	T	T	-	-	-	C	C	C	T	C	-	-	-	-	C	-	G	C	T	T	-	A	-	G	G	C	T	T
IRIS_313-12186	NA	C	NA	NA	T	NA	NA	A	NA	T	NA	NA	A	NA	C	BAO DAM::IRGC 89352-1::[IRIS 313-12186]	IRIS 313-12186	IRGC 128239	indx	9	C	T	T	-	-	-	C	C	C	T	C	-	-	-	-	A	A	G	C	T	T	-	A	-	G	G	C	T	T
IRIS_313-12187	NA	C	NA	NA	T	NA	NA	A	NA	T	NA	NA	A	NA	C	CHAM LEK::IRGC 89387-1::[IRIS 313-12187]	IRIS 313-12187	IRGC 127255	indx	19	C	T	T	-	-	-	C	C	C	T	C	-	-	-	-	A	A	G	C	T	T	-	A	-	G	G	C	T	T
IRIS_313-12188	NA	C	NA	NA	T	NA	NA	A	NA	T	NA	NA	A	NA	C	CHAO DO::IRGC 89430-1::[IRIS 313-12188]	IRIS 313-12188	IRGC 127260	ind3	17	C	T	T	-	-	-	C	C	C	T	C	-	-	-	-	A	A	G	C	T	T	-	A	-	G	G	C	T	T
IRIS_313-12194	NA	C	NA	NA	T	NA	NA	A	NA	T	NA	NA	A	NA	C	EA POUAK::IRGC 89748-1::[IRIS 313-12194]	IRIS 313-12194	IRGC 127353	ind3	10	C	T	T	-	-	-	C	C	C	T	C	-	-	-	-	A	A	G	C	T	T	-	A	-	G	G	C	T	T
IRIS_313-12220	NA	C	NA	NA	T	NA	NA	A	NA	T	NA	NA	A	NA	C	CHAO KHIE KHOUAY::IRGC 90968-1::[IRIS 313-12220]	IRIS 313-12220	IRGC 131976	indx	27	C	T	T	-	-	-	C	C	C	T	C	-	-	-	-	A	A	G	C	T	T	-	A	-	G	G	C	T	T
IRIS_313-12221	NA	C	NA	NA	T	NA	NA	A	NA	T	NA	NA	A	NA	C	EA LOUY::IRGC 91220-1::[IRIS 313-12221]	IRIS 313-12221	IRGC 127351	ind3	19	C	T	T	-	-	-	C	C	C	T	C	-	-	-	-	A	A	G	C	T	T	-	A	-	G	G	C	T	T
IRIS_313-12231	NA	C	NA	NA	T	NA	NA	A	NA	T	NA	NA	A	NA	C	TOUN::IRGC 92291-2::[IRIS 313-12231]	IRIS 313-12231	IRGC 128192	ind3	20	C	T	T	-	-	-	C	C	C	T	C	-	-	-	-	A	A	G	C	T	T	-	A	-	G	G	C	T	T
IRIS_313-12261	NA	C	NA	NA	T	NA	NA	A	NA	T	NA	NA	A	NA	C	EA TOM::IRGC 95276-1::[IRIS 313-12261]	IRIS 313-12261	IRGC 127354	ind3	20	C	T	T	-	-	-	C	C	C	T	C	-	-	-	-	A	A	G	C	T	T	-	A	-	G	G	C	T	T
IRIS_313-12275	NA	C	NA	NA	T	NA	NA	A	NA	T	NA	NA	A	NA	C	MAGU::IRGC 97027-1::[IRIS 313-12275]	IRIS 313-12275	IRGC 127590	indx	12	C	T	T	-	-	-	C	C	C	T	C	-	-	-	-	A	A	G	C	T	T	-	A	-	G	G	C	T	T
IRIS_313-12280	NA	C	NA	NA	T	NA	NA	A	NA	T	NA	NA	A	NA	C	MAKALIOKA::IRGC 97193-1::[IRIS 313-12280]	IRIS 313-12280	IRGC 132013	indx	18	C	T	T	-	-	-	C	C	C	T	C	-	-	-	-	A	A	G	C	T	T	-	A	-	G	G	C	T	T
IRIS_313-12283	NA	C	NA	NA	T	NA	NA	A	NA	T	NA	NA	A	NA	C	VARY 5000 FOTSY::IRGC 97235-1::[IRIS 313-12283]	IRIS 313-12283	IRGC 127884	indx	21	C	T	T	-	-	-	C	C	C	T	C	-	-	-	-	A	A	G	C	T	T	-	A	-	G	G	C	T	T
IRIS_313-12288	NA	C	NA	NA	T	NA	NA	A	NA	T	NA	NA	A	NA	C	NGWE TOE KYE::IRGC 97530-1::[IRIS 313-12288]	IRIS 313-12288	IRGC 128405	ind3	20	C	T	T	-	-	-	C	C	C	T	C	-	-	-	-	C	-	G	C	T	T	-	A	-	G	G	C	T	T
IRIS_313-12303	NA	C	NA	NA	T	NA	NA	A	NA	T	NA	NA	A	NA	C	LG 9274::IRGC 98715-1::[IRIS 313-12303]	IRIS 313-12303	IRGC 127561	indx	27	C	T	T	-	-	-	C	C	C	T	C	-	-	-	-	A	A	G	C	T	T	-	A	-	G	G	C	T	T
IRIS_313-12305	NA	C	NA	NA	T	NA	NA	A	NA	T	NA	NA	A	NA	C	PA KHENG KHAW::IRGC 98779-1::[IRIS 313-12305]	IRIS 313-12305	IRGC 127708	ind3	21	C	T	T	-	-	-	C	C	C	T	C	-	-	-	-	A	A	G	C	T	T	-	A	-	G	G	C	T	T
IRIS_313-15897	NA	C	NA	NA	T	NA	NA	A	NA	T	NA	NA	A	NA	C	SANHUANGZHAN NO 2::G1::[IRIS 313-15897]	IRIS 313-15897	IRGC 126968	indx	21	C	T	T	-	-	-	C	C	C	T	C	-	-	-	-	A	A	G	C	T	T	-	A	-	G	G	C	T	T
IRIS_313-15902	NA	C	NA	NA	T	NA	NA	A	NA	T	NA	NA	A	NA	C	IRRI 146::G1::[IRIS 313-15902]	IRIS 313-15902	IRGC 126966	ind1B	14	C	T	T	-	-	-	C	C	C	T	C	-	-	-	-	A	A	G	C	T	T	-	A	-	G	G	C	T	T
IRIS_313-15906	NA	C	NA	NA	T	NA	NA	A	NA	T	NA	NA	A	NA	C	IR 73571-3B-11-3-K2::G1::[IRIS 313-15906]	IRIS 313-15906	IRGC 126963	indx	19	C	T	T	-	-	-	C	C	C	T	C	-	-	-	-	A	A	G	C	T	T	-	A	-	G	G	C	T	T
IRIS_313-7620	NA	C	NA	NA	T	NA	NA	A	NA	T	NA	NA	A	NA	C	GAMBIAKA::GERVEX 7920-C1::[IRIS 313-7620]	IRIS 313-7620	IRGC 124392	ind3	20	C	T	T	-	-	-	C	C	C	T	C	-	-	-	-	A	A	G	C	T	T	-	A	-	G	G	C	T	T
IRIS_313-7636	NA	C	NA	NA	T	NA	NA	A	NA	T	NA	NA	A	NA	C	ADNY 11::C1::[IRIS 313-7636]	IRIS 313-7636	IRGC 126992	ind1B	9	C	T	T	-	-	-	C	C	C	T	C	-	-	-	-	A	A	G	C	T	T	-	A	-	G	G	C	T	T
IRIS_313-7664	NA	C	NA	NA	T	NA	NA	A	NA	T	NA	NA	A	NA	C	CICA 8::C1::[IRIS 313-7664]	IRIS 313-7664	IRGC 122011	ind1B	20.5	C	T	T	-	-	-	C	C	C	T	C	-	-	-	-	A	A	G	C	T	T	-	A	-	G	G	C	T	T
IRIS_313-7685	NA	C	NA	NA	T	NA	NA	A	NA	T	NA	NA	A	NA	C	IR 19746-28-2-2::IRGC 78072-C1::[IRIS 313-7685]	IRIS 313-7685	IRGC 122089	ind1B	22	C	T	T	-	-	-	C	C	C	T	C	-	-	-	-	A	A	G	C	T	T	-	A	-	G	G	C	T	T
IRIS_313-7736	NA	C	NA	NA	T	NA	NA	A	NA	T	NA	NA	A	NA	C	NONA BOKRA::IRGC 22710-C1::[IRIS 313-7736]	IRIS 313-7736	IRGC 122181	ind2	20	C	T	T	-	-	-	C	C	C	T	C	-	-	-	-	A	A	G	C	T	T	-	A	-	G	G	C	T	T
IRIS_313-7769	NA	C	NA	NA	T	NA	NA	A	NA	T	NA	NA	A	NA	C	SALUMPIKIT::IRTP 4777-C1::[IRIS 313-7769]	IRIS 313-7769	IRGC 122236	indx	18	C	T	T	-	-	-	C	C	C	T	C	-	-	-	-	A	A	G	C	T	T	-	A	-	G	G	C	T	T
IRIS_313-7780	NA	C	NA	NA	T	NA	NA	A	NA	T	NA	NA	A	NA	C	SONA::IRGC 26971-C1::[IRIS 313-7780]	IRIS 313-7780	IRGC 122255	indx	10	C	T	T	-	-	-	C	C	C	T	C	-	-	-	-	C	-	G	C	T	T	-	A	-	G	G	C	T	T
IRIS_313-7807	NA	C	NA	NA	T	NA	NA	A	NA	T	NA	NA	A	NA	C	WAS 170-B-B-1-1::C1::[IRIS 313-7807]	IRIS 313-7807	IRGC 122284	ind1B	24	C	T	T	-	-	-	C	C	C	T	C	-	-	-	-	C	-	G	C	T	T	-	A	-	G	G	C	T	T
IRIS_313-7832	NA	C	NA	NA	T	NA	NA	A	NA	T	NA	NA	A	NA	C	WAS 63-22-5-9-10-1::C1::[IRIS 313-7832]	IRIS 313-7832	IRGC 122297	ind1B	17	C	T	T	-	-	-	C	C	C	T	C	-	-	-	-	C	-	G	C	T	T	-	A	-	G	G	C	T	T
IRIS_313-7907	NA	C	NA	NA	T	NA	NA	A	NA	T	NA	NA	A	NA	C	IR 68704-145-1-1-B::C1::[IRIS 313-7907]	IRIS 313-7907	IRGC 122108	trop	14	C	T	T	-	-	-	C	C	C	T	C	-	-	-	-	A	A	G	C	T	T	-	A	-	G	G	C	T	T
IRIS_313-8183	NA	C	NA	NA	T	NA	NA	A	NA	T	NA	NA	A	NA	C	DREW::GERVEX 1650-C1::[IRIS 313-8183]	IRIS 313-8183	IRGC 122304	trop	19	C	T	T	-	-	-	C	C	C	T	C	-	-	-	-	A	A	G	C	T	T	-	A	-	G	G	C	T	T
IRIS_313-8285	NA	C	NA	NA	T	NA	NA	A	NA	T	NA	NA	A	NA	C	KATY::IRGC 77140-1::[IRIS 313-8285]	IRIS 313-8285	IRGC 125614	trop	27	C	T	T	-	-	-	C	C	C	T	C	-	-	-	-	C	-	G	C	T	T	-	A	-	G	G	C	T	T
IRIS_313-8293	NA	C	NA	NA	T	NA	NA	A	NA	T	NA	NA	A	NA	C	SAGNADE::IRGC 15801-1::[IRIS 313-8293]	IRIS 313-8293	IRGC 132432	ind3	37	C	T	T	-	-	-	C	C	C	T	C	-	-	-	-	A	A	G	C	T	T	-	A	-	G	G	C	T	T
IRIS_313-8303	NA	C	NA	NA	T	NA	NA	A	NA	T	NA	NA	A	NA	C	SURMATIYA::IRGC 74779-1::[IRIS 313-8303]	IRIS 313-8303	IRGC 126008	ind2	9	C	T	T	-	-	-	C	C	C	T	C	-	-	-	-	C	-	G	C	T	T	-	A	-	G	G	C	T	T
IRIS_313-8324	NA	C	NA	NA	T	NA	NA	A	NA	T	NA	NA	A	NA	C	POENOET HITAM::IRGC 8193-1::[IRIS 313-8324]	IRIS 313-8324	IRGC 121474	admix	23	C	T	T	-	-	-	C	C	C	T	C	-	-	-	-	A	A	G	C	T	T	-	A	-	G	G	C	T	T
IRIS_313-8383	NA	C	NA	NA	T	NA	NA	A	NA	T	NA	NA	A	NA	C	GENE::IRGC 67434-1::[IRIS 313-8383]	IRIS 313-8383	IRGC 125964	indx	8	C	T	T	-	-	-	C	C	C	T	C	-	-	-	-	C	-	G	C	T	T	-	A	-	G	G	C	T	T
IRIS_313-8386	NA	C	NA	NA	T	NA	NA	A	NA	T	NA	NA	A	NA	C	ARC 10812::IRGC 21074-1::[IRIS 313-8386]	IRIS 313-8386	IRGC 126173	indx	29	C	T	T	-	-	-	C	C	C	T	C	-	-	-	-	A	A	G	C	T	T	-	A	-	G	G	C	T	T
IRIS_313-8405	NA	C	NA	NA	T	NA	NA	A	NA	T	NA	NA	A	NA	C	JIN JUN DAO::IRGC 59710-1::[IRIS 313-8405]	IRIS 313-8405	IRGC 125613	indx	19	C	T	T	-	-	-	C	C	C	T	C	-	-	-	-	A	A	G	C	T	T	-	A	-	G	G	C	T	T
IRIS_313-8437	NA	C	NA	NA	T	NA	NA	A	NA	T	NA	NA	A	NA	C	IRRIBINI::IRGC 49094-1::[IRIS 313-8437]	IRIS 313-8437	IRGC 126215	indx	21	C	T	T	-	-	-	C	C	C	T	C	-	-	-	-	A	A	G	C	T	T	-	A	-	G	G	C	T	T
IRIS_313-8450	NA	C	NA	NA	T	NA	NA	A	NA	T	NA	NA	A	NA	C	498-2A BR 8::IRGC 5891-1::[IRIS 313-8450]	IRIS 313-8450	IRGC 126041	ind2	10	C	T	T	-	-	-	C	C	C	T	C	-	-	-	-	C	-	G	C	T	T	-	A	-	G	G	C	T	T
IRIS_313-8453	NA	C	NA	NA	T	NA	NA	A	NA	T	NA	NA	A	NA	C	ARC 18597::IRGC 43299-1::[IRIS 313-8453]	IRIS 313-8453	IRGC 126043	indx	21	C	T	T	-	-	-	C	C	C	T	C	-	-	-	-	A	A	G	C	T	T	-	A	-	G	G	C	T	T
IRIS_313-8468	NA	C	NA	NA	T	NA	NA	A	NA	T	NA	NA	A	NA	A/C	LEONG ORN 4135::IRGC 14087-1::[IRIS 313-8468]	IRIS 313-8468	IRGC 126233	ind3	13	C	T	T	-	-	-	C	C	C	T	C	-	-	-	-	C	-	G	C	T	T	-	A	-	G	G	C	T	T
IRIS_313-8485	NA	C	NA	NA	T	NA	NA	A	NA	T	NA	NA	A	NA	C	NAM SA GUI 19::[IRIS 313-8485]	IRIS 313-8485	IRGC 117536	ind3	16	C	T	T	-	-	-	C	C	C	T	C	-	-	-	-	A	A	G	C	T	T	-	A	-	G	G	C	T	T
IRIS_313-8567	NA	C	NA	NA	T	NA	NA	A	NA	T	NA	NA	A	NA	C	SINERBESA::IRGC 38711-1::[IRIS 313-8567]	IRIS 313-8567		ind3	17	C	T	T	-	-	-	C	C	C	T	C	-	-	-	-	A	A	G	C	T	T	-	A	-	G	G	C	T	T
IRIS_313-8638	NA	C	NA	NA	T	NA	NA	A	NA	T	NA	NA	A	NA	C	Na souan::IRGC 11889-1::[IRIS 313-8638]	IRIS 313-8638	IRGC 126250	ind3	21	C	T	T	-	-	-	C	C	C	T	C	-	-	-	-	A	A	G	C	T	T	-	A	-	G	G	C	T	T
IRIS_313-8643	NA	C	NA	NA	T	NA	NA	A	NA	T	NA	NA	A	NA	C	DAJA::IRGC 17440-1::[IRIS 313-8643]	IRIS 313-8643	IRGC 131935	ind3	17	C	T	T	-	-	-	C	C	C	T	C	-	-	-	-	A	A	G	C	T	T	-	A	-	G	G	C	T	T
IRIS_313-8645	NA	C	NA	NA	T	NA	NA	A	NA	T	NA	NA	A	NA	C	PAI YI PING::IRGC 1368-1::[IRIS 313-8645]	IRIS 313-8645	IRGC 126122	ind1A	16	C	T	T	-	-	-	C	C	C	T	C	-	-	-	-	C	-	G	C	T	T	-	A	-	G	G	C	T	T
IRIS_313-8657	NA	C	NA	NA	T	NA	NA	A	NA	T	NA	NA	A	NA	C	CO 19::IRGC 5905-1::[IRIS 313-8657]	IRIS 313-8657	IRGC 135525	indx	15	C	T	T	-	-	-	C	C	C	T	C	-	-	-	-	C	-	G	C	T	T	-	A	-	G	G	C	T	T
IRIS_313-8660	NA	C	NA	NA	T	NA	NA	A	NA	T	NA	NA	A	NA	A	KOTTEYARAN::IRGC 47383-1::[IRIS 313-8660]	IRIS 313-8660	IRGC 125616	ind2	23	C	T	T	-	-	-	C	C	C	T	C	-	-	-	-	A	A	G	C	T	T	-	A	-	G	G	C	T	T
IRIS_313-8683	NA	C	NA	NA	T	NA	NA	A	NA	T	NA	NA	A	NA	C	JOTA BITCHI 1::IRGC 77253-1::[IRIS 313-8683]	IRIS 313-8683	IRGC 135532	ind2	21	C	T	T	-	-	-	C	C	C	T	C	-	-	-	-	C	-	G	C	T	T	-	A	-	G	G	C	T	T
IRIS_313-8697	NA	C	NA	NA	T	NA	NA	A	NA	T	NA	NA	A	NA	C	YEBAWYIN::IRGC 33885-1::[IRIS 313-8697]	IRIS 313-8697	IRGC 125628	ind3	18	C	T	T	-	-	-	C	C	C	T	C	-	-	-	-	A	A	G	C	T	T	-	A	-	G	G	C	T	T
IRIS_313-8703	NA	C	NA	NA	T	NA	NA	A	NA	T	NA	NA	A	NA	C	DA 7::[IRIS 313-8703]	IRIS 313-8703	IRGC 124432	ind2	29	C	T	T	-	-	-	C	C	C	T	C	-	-	-	-	A	A	G	C	T	T	-	A	-	G	G	C	T	T
IRIS_313-8722	NA	C	NA	NA	T	NA	NA	A	NA	T	NA	NA	A	NA	C	HAWM TOONG::IRGC 48007-1::[IRIS 313-8722]	IRIS 313-8722		ind3	15	C	T	T	-	-	-	C	C	C	T	C	-	-	-	-	C	-	G	C	T	T	-	A	-	G	G	C	T	T
IRIS_313-8723	NA	C	NA	NA	T	NA	NA	A	NA	T	NA	NA	A	NA	C	KUTAI PAYA::IRGC 19528-1::[IRIS 313-8723]	IRIS 313-8723	IRGC 126033	ind3	11	C	T	T	-	-	-	C	C	C	T	C	-	-	-	-	C	-	G	C	T	T	-	A	-	G	G	C	T	T
IRIS_313-8725	NA	C	NA	NA	T	NA	NA	A	NA	T	NA	NA	A	NA	C	PULUT BARAYA::IRGC 27393-1::[IRIS 313-8725]	IRIS 313-8725	IRGC 126262	ind3	29	C	T	T	-	-	-	C	C	C	T	C	-	-	-	-	A	A	G	C	T	T	-	A	-	G	G	C	T	T
IRIS_313-8733	NA	C	NA	NA	T	NA	NA	A	NA	T	NA	NA	A	NA	C	NOLOS::IRGC 77285-1::[IRIS 313-8733]	IRIS 313-8733		ind2	21	C	T	T	-	-	-	C	C	C	T	C	-	-	-	-	A	A	G	C	T	T	-	A	-	G	G	C	T	T
IRIS_313-8737	NA	C	NA	NA	T	NA	NA	A	NA	T	NA	NA	A	NA	C	SADAJIRA 19-287::IRGC 38320-1::[IRIS 313-8737]	IRIS 313-8737	IRGC 126270	ind2	15	C	T	T	-	-	-	C	C	C	T	C	-	-	-	-	C	-	G	C	T	T	-	A	-	G	G	C	T	T
IRIS_313-8744	NA	C	NA	NA	T	NA	NA	A	NA	T	NA	NA	A	NA	C	REMOL::IRGC 18624-1::[IRIS 313-8744]	IRIS 313-8744	IRGC 126266	ind3	9	C	T	T	-	-	-	C	C	C	T	C	-	-	-	-	A	A	G	C	T	T	-	A	-	G	G	C	T	T
IRIS_313-8751	NA	C	NA	NA	T	NA	NA	A	NA	T	NA	NA	A	NA	C	HNANWA::IRGC 33118-1::[IRIS 313-8751]	IRIS 313-8751	IRGC 126209	ind3	23	C	T	T	-	-	-	C	C	C	T	C	-	-	-	-	A	A	G	C	T	T	-	A	-	G	G	C	T	T
IRIS_313-8785	NA	C	NA	NA	T	NA	NA	A	NA	T	NA	NA	A	NA	C	LEUANG AWN::IRGC 48257-1::[IRIS 313-8785]	IRIS 313-8785		ind3	18	C	T	T	-	-	-	C	C	C	T	C	-	-	-	-	A	A	G	C	T	T	-	A	-	G	G	C	T	T
IRIS_313-8833	NA	C	NA	NA	T	NA	NA	A	NA	T	NA	NA	A	NA	C	SIMET 2::IRGC 25734-1::[IRIS 313-8833]	IRIS 313-8833	IRGC 126142	ind3	17	C	T	T	-	-	-	C	C	C	T	C	-	-	-	-	C	-	G	C	T	T	-	A	-	G	G	C	T	T
IRIS_313-8844	NA	C	NA	NA	T	NA	NA	A	NA	T	NA	NA	A	NA	C	ARC 14060::IRGC 41374-1::[IRIS 313-8844]	IRIS 313-8844	IRGC 125648	ind2	16	C	T	T	-	-	-	C	C	C	T	C	-	-	-	-	C	-	G	C	T	T	-	A	-	G	G	C	T	T
IRIS_313-8854	NA	C	NA	NA	T	NA	NA	A	NA	T	NA	NA	A	NA	C	CHAKOL::IRGC 77226-1::[IRIS 313-8854]	IRIS 313-8854	IRGC 125696	ind2	13	C	T	T	-	-	-	C	C	C	T	C	-	-	-	-	C	-	G	C	T	T	-	A	-	G	G	C	T	T
IRIS_313-8889	NA	C	NA	NA	T	NA	NA	A	NA	T	NA	NA	A	NA	C	LU MAO ZHAN::IRGC 68159-1::[IRIS 313-8889]	IRIS 313-8889	IRGC 125829	indx	16	C	T	T	-	-	-	C	C	C	T	C	-	-	-	-	C	-	G	C	T	T	-	A	-	G	G	C	T	T
IRIS_313-8914	NA	C	NA	NA	T	NA	NA	A	NA	T	NA	NA	A	NA	C	E 2040::IRGC 67968-1::[IRIS 313-8914]	IRIS 313-8914	IRGC 125731	indx	27	C	T	T	-	-	-	C	C	C	T	C	-	-	-	-	A	A	G	C	T	T	-	A	-	G	G	C	T	T
IRIS_313-8956	NA	C	NA	NA	T	NA	NA	A	NA	T	NA	NA	A	NA	C	RADEN KARAMUNTING::IRGC 20098-1::[IRIS 313-8956]	IRIS 313-8956	IRGC 125882	ind3	29	C	T	T	-	-	-	C	C	C	T	C	-	-	-	-	A	A	G	C	T	T	-	A	-	G	G	C	T	T
IRIS_313-8957	NA	C	NA	NA	T	NA	NA	A	NA	T	NA	NA	A	NA	C	BAM 9::IRGC 6179-1::[IRIS 313-8957]	IRIS 313-8957	IRGC 125670	ind2	23	C	T	T	-	-	-	C	C	C	T	C	-	-	-	-	A	A	G	C	T	T	-	A	-	G	G	C	T	T
IRIS_313-8967	NA	C	NA	NA	T	NA	NA	A	NA	T	NA	NA	A	NA	C	ARC 12576::IRGC 22163-1::[IRIS 313-8967]	IRIS 313-8967	IRGC 125645	indx	28	C	T	T	-	-	-	C	C	C	T	C	-	-	-	-	A	A	G	C	T	T	-	A	-	G	G	C	T	T
IRIS_313-8968	NA	C	NA	NA	T	NA	NA	A	NA	T	NA	NA	A	NA	A	KALU ILANKALAYAN::IRGC 36270-1::[IRIS 313-8968]	IRIS 313-8968	IRGC 125792	ind2	14	C	T	T	-	-	-	C	C	C	T	C	-	-	-	-	A	A	G	C	T	T	-	A	-	G	G	C	T	T
IRIS_313-8978	NA	C	NA	NA	T	NA	NA	A	NA	T	NA	NA	A	NA	C	IE MATA CICEM::IRGC 66562-1::[IRIS 313-8978]	IRIS 313-8978		ind3	21	C	T	T	-	-	-	C	C	C	T	C	-	-	-	-	A	A	G	C	T	T	-	A	-	G	G	C	T	T
IRIS_313-8980	NA	C	NA	NA	T	NA	NA	A	NA	T	NA	NA	A	NA	C	E DAW HAWM::IRGC 47938-1::[IRIS 313-8980]	IRIS 313-8980	IRGC 126132	ind3	18	C	T	T	-	-	-	C	C	C	T	C	-	-	-	-	A	A	G	C	T	T	-	A	-	G	G	C	T	T
IRIS_313-8994	NA	C	NA	NA	T	NA	NA	A	NA	T	NA	NA	A	NA	C	ARC 14064::IRGC 41377-1::[IRIS 313-8994]	IRIS 313-8994	IRGC 125649	indx	19	C	T	T	-	-	-	C	C	C	T	C	-	-	-	-	A	A	G	C	T	T	-	A	-	G	G	C	T	T
IRIS_313-9017	NA	C	NA	NA	T	NA	NA	A	NA	T	NA	NA	A	NA	C	PING SHAN TA TSWEN KU::IRGC 1563-1::[IRIS 313-9017]	IRIS 313-9017	IRGC 126988	indx	9	C	T	T	-	-	-	C	C	C	T	C	-	-	-	-	C	-	G	C	T	T	-	A	-	G	G	C	T	T
IRIS_313-9019	NA	C	NA	NA	T	NA	NA	A	NA	T	NA	NA	A	NA	C	KAM PAI::IRGC 78245-1::[IRIS 313-9019]	IRIS 313-9019	IRGC 126152	ind3	21	C	T	T	-	-	-	C	C	C	T	C	-	-	-	-	A	A	G	C	T	T	-	A	-	G	G	C	T	T
IRIS_313-9054	NA	C	NA	NA	T	NA	NA	A	NA	T	NA	NA	A	NA	C	BIDAPIK::IRGC 43354-1::[IRIS 313-9054]	IRIS 313-9054	IRGC 131933	ind3	18	C	T	T	-	-	-	C	C	C	T	C	-	-	-	-	C	-	G	C	T	T	-	A	-	G	G	C	T	T
IRIS_313-9102	NA	C	NA	NA	T	NA	NA	A	NA	T	NA	NA	A	NA	C	MANUS::IRGC 71570-1::[IRIS 313-9102]	IRIS 313-9102		ind3	27	C	T	T	-	-	-	C	C	C	T	C	-	-	-	-	A	A	G	C	T	T	-	A	-	G	G	C	T	T
IRIS_313-9111	NA	C	NA	NA	T	NA	NA	A	NA	T	NA	NA	A	NA	C	XIA ZHI BAI::IRGC 53437-1::[IRIS 313-9111]	IRIS 313-9111	IRGC 125940	ind1A	17	C	T	T	-	-	-	C	C	C	T	C	-	-	-	-	C	-	G	C	T	T	-	A	-	G	G	C	T	T
IRIS_313-9117	NA	C	NA	NA	T	NA	NA	A	NA	T	NA	NA	A	NA	C	BAJAR KUNING PAHIT::IRGC 17186-1::[IRIS 313-9117]	IRIS 313-9117	IRGC 131931	ind3	28	C	T	T	-	-	-	C	C	C	T	C	-	-	-	-	A	A	G	C	T	T	-	A	-	G	G	C	T	T
IRIS_313-9131	NA	C	NA	NA	T	NA	NA	A	NA	T	NA	NA	A	NA	C	DOC PHUNG D 12::IRGC 10234-1::[IRIS 313-9131]	IRIS 313-9131	IRGC 135749	ind3	21	C	T	T	-	-	-	C	C	C	T	C	-	-	-	-	A	A	G	C	T	T	-	A	-	G	G	C	T	T
IRIS_313-9156	NA	C	NA	NA	T	NA	NA	A	NA	T	NA	NA	A	NA	C	DHOLA AMAN (LOWLAND AMAN)::IRGC 8341-1::[IRIS 313-9156]	IRIS 313-9156	IRGC 126200	ind2	23	C	T	T	-	-	-	C	C	C	T	C	-	-	-	-	A	A	G	C	T	T	-	A	-	G	G	C	T	T
IRIS_313-9170	NA	C	NA	NA	T	NA	NA	A	NA	T	NA	NA	A	NA	C	TK DEEP STRAW 34-786::IRGC 38522-1::[IRIS 313-9170]	IRIS 313-9170		aro	19	C	T	T	-	-	-	C	C	C	T	C	-	-	-	-	A	A	G	C	T	T	-	A	-	G	G	C	T	T
IRIS_313-9174	NA	C	NA	NA	T	NA	NA	A	NA	T	NA	NA	A	NA	C	KUSHIARA::IRGC 34709-1::[IRIS 313-9174]	IRIS 313-9174	IRGC 125814	ind2	17	C	T	T	-	-	-					C	-	-	-	-	A	A	G	C	T	T	-	A	-	G	G	C	T	T
IRIS_313-9197	NA	C	NA	NA	T	NA	NA	A	NA	T	NA	NA	A	NA	C	GABAHSI RASAKI C 90::IRGC 49647-1::[IRIS 313-9197]	IRIS 313-9197	IRGC 126205	ind3	15	C	T	T	-	-	-	C	C	C	T	C	-	-	-	-	A	A	G	C	T	T	-	A	-	G	G	C	T	T
IRIS_313-9210	NA	C	NA	NA	T	NA	NA	A	NA	T	NA	NA	A	NA	C	KUATEK::IRGC 14285-1::[IRIS 313-9210]	IRIS 313-9210	IRGC 131915	ind3	21	C	T	T	-	-	-	C	C	C	T	C	-	-	-	-	A	A	G	C	T	T	-	A	-	G	G	C	T	T
IRIS_313-9243	NA	C	NA	NA	T	NA	NA	A	NA	T	NA	NA	A	NA	C	MACAN BINUNDOK::IRGC 8245-1::[IRIS 313-9243]	IRIS 313-9243	IRGC 126239	indx	19	C	T	T	-	-	-	C	C	C	T	C	-	-	-	-	A	A	G	C	T	T	-	A	-	G	G	C	T	T
IRIS_313-9271	NA	C	NA	NA	T	NA	NA	A	NA	T	NA	NA	A	NA	C	PURA BINNI::IRGC 26772-1::[IRIS 313-9271]	IRIS 313-9271	IRGC 125878	ind2	20	C	T	T	-	-	-	C	C	C	T	C	-	-	-	-	A	A	G	C	T	T	-	A	-	G	G	C	T	T
IRIS_313-9273	NA	C	NA	NA	T	NA	NA	A	NA	T	NA	NA	A	NA	C	RADEN SAWO 1::IRGC 57578-1::[IRIS 313-9273]	IRIS 313-9273		ind3	18	C	T	T	-	-	-	C	C	C	T	C	-	-	-	-	C	-	G	C	T	T	-	A	-	G	G	C	T	T
IRIS_313-9329	NA	C	NA	NA	T	NA	NA	A	NA	T	NA	NA	A	NA	C	KERITING TINGGI::IRGC 19972-1::[IRIS 313-9329]	IRIS 313-9329	IRGC 131941	ind3	29	C	T	T	-	-	-	C	C	C	T	C	-	-	-	-	A	A	G	C	T	T	-	A	-	G	G	C	T	T
IRIS_313-9347	NA	C	NA	NA	T	NA	NA	A	NA	T	NA	NA	A	NA	C	ARC 13778::IRGC 41216-1::[IRIS 313-9347]	IRIS 313-9347	IRGC 125647	indx	5	C	T	T	-	-	-	C	C	C	T	C	-	-	-	-	C	-	G	C	T	T	-	A	-	G	G	C	T	T
IRIS_313-9348	NA	C	NA	NA	T	NA	NA	A	NA	T	NA	NA	A	NA	C	BK 26::IRGC 45197-1::[IRIS 313-9348]	IRIS 313-9348	IRGC 125684	ind2	19	C	T	T	-	-	-	C	C	C	T	C	-	-	-	-	A	A	G	C	T	T	-	A	-	G	G	C	T	T
IRIS_313-9351	NA	C	NA	NA	T	NA	NA	A	NA	T	NA	NA	A	NA	A	PARA NELLU::IRGC 50009-1::[IRIS 313-9351]	IRIS 313-9351	IRGC 125868	ind2	26	C	T	T	-	-	-	C	C	C	T	C	-	-	-	-	C	-	G	C	T	T	-	A	-	G	G	C	T	T
IRIS_313-9372	NA	C	NA	NA	T	NA	NA	A	NA	T	NA	NA	A	NA	C	WI BIR SHUN::IRGC 4602-1::[IRIS 313-9372]	IRIS 313-9372	IRGC 125937	ind1A	25	C	T	T	-	-	-	C	C	C	T	C	-	-	-	-	A	A	G	C	T	T	-	A	-	G	G	C	T	T
IRIS_313-9384	NA	C	NA	NA	T	NA	NA	A	NA	T	NA	NA	A	NA	C	BARIK KUDI::IRGC 52807-1::[IRIS 313-9384]	IRIS 313-9384	IRGC 125674	ind2	21	C	T	T	-	-	-	C	C	C	T	C	-	-	-	-	A	A	G	C	T	T	-	A	-	G	G	C	T	T
IRIS_313-9391	NA	C	NA	NA	T	NA	NA	A	NA	T	NA	NA	A	NA	C	KALABAIL::IRGC 25877-1::[IRIS 313-9391]	IRIS 313-9391	IRGC 125789	ind2	23	C	T	T	-	-	-	C	C	C	T	C	-	-	-	-	A	A	G	C	T	T	-	A	-	G	G	C	T	T
IRIS_313-9397	NA	C	NA	NA	T	NA	NA	A	NA	T	NA	NA	A	NA	C	DUDHSWAR 15-141::IRGC 37951-1::[IRIS 313-9397]	IRIS 313-9397		ind2	21	C	T	T	-	-	-	C	C	C	T	C	-	-	-	-	A	A	G	C	T	T	-	A	-	G	G	C	T	T
IRIS_313-9409	NA	C	NA	NA	T	NA	NA	A	NA	T	NA	NA	A	NA	C	GUMPANGAR::IRGC 71524-1::[IRIS 313-9409]	IRIS 313-9409	IRGC 131937	ind3	37	C	T	T	-	-	-	C	C	C	T	C	-	-	-	-	A	A	G	C	T	T	-	A	-	G	G	C	T	T
IRIS_313-9427	NA	C	NA	NA	T	NA	NA	A	NA	T	NA	NA	A	NA	C	ARC 18092::IRGC 42256-1::[IRIS 313-9427]	IRIS 313-9427	IRGC 125654	indx	23	C	T	T	-	-	-	C	C	C	T	C	-	-	-	-	A	A	G	C	T	T	-	A	-	G	G	C	T	T
IRIS_313-9433	NA	C	NA	NA	T	NA	NA	A	NA	T	NA	NA	A	NA	C	GOKULGANJA::IRGC 45701-1::[IRIS 313-9433]	IRIS 313-9433	IRGC 126151	ind2	19	C	T	T	-	-	-	C	C	C	T	C	-	-	-	-	A	A	G	C	T	T	-	A	-	G	G	C	T	T
IRIS_313-9451	NA	C	NA	NA	T	NA	NA	A	NA	T	NA	NA	A	NA	C	PAMAH S 18::IRGC 61322-1::[IRIS 313-9451]	IRIS 313-9451	IRGC 126140	indx	13	C	T	T	-	-	-	C	C	C	T	C	-	-	-	-	A	A	G	C	T	T	-	A	-	G	G	C	T	T
IRIS_313-9461	NA	C	NA	NA	T	NA	NA	A	NA	T	NA	NA	A	NA	C	KARANTABA 1::IRGC 15924-1::[IRIS 313-9461]	IRIS 313-9461	IRGC 125795	ind3	13	C	T	T	-	-	-	C	C	C	T	C	-	-	-	-	A	A	G	C	T	T	-	A	-	G	G	C	T	T
IRIS_313-9482	NA	C	NA	NA	T	NA	NA	A	NA	T	NA	NA	A	NA	C	E 2024::IRGC 67958-1::[IRIS 313-9482]	IRIS 313-9482	IRGC 125730	ind1B	14	C	T	T	-	-	-	C	C	C	T	C	-	-	-	-	A	A	G	C	T	T	-	A	-	G	G	C	T	T
IRIS_313-9484	NA	C	NA	NA	T	NA	NA	A	NA	T	NA	NA	A	NA	C	CHNNOR::IRGC 67485-1::[IRIS 313-9484]	IRIS 313-9484	IRGC 125706	indx	17	C	T	T	-	-	-	C	C	C	T	C	-	-	-	-	A	A	G	C	T	T	-	A	-	G	G	C	T	T
IRIS_313-9492	NA	C	NA	NA	T	NA	NA	A	NA	T	NA	NA	A	NA	C	NCS 237::IRGC 62202-1::[IRIS 313-9492]	IRIS 313-9492	IRGC 125853	ind2	18	C	T	T	-	-	-	C	C	C	T	C	-	-	-	-	A	A	G	C	T	T	-	A	-	G	G	C	T	T
IRIS_313-9533	NA	C	NA	NA	T	NA	NA	A	NA	T	NA	NA	A	NA	C	DUD KUNING::IRGC 44-1::[IRIS 313-9533]	IRIS 313-9533	IRGC 125729	ind3	20	C	T	T	-	-	-	C	C	C	T	C	-	-	-	-	C	-	G	C	T	T	-	A	-	G	G	C	T	T
IRIS_313-9593	NA	C	NA	NA	T	NA	NA	A	NA	T	NA	NA	A	NA	C	ARC 15088::IRGC 41934-1::[IRIS 313-9593]	IRIS 313-9593	IRGC 125651	indx	28	C	T	T	-	-	-	C	C	C	T	C	-	-	-	-	C	-	G	C	T	T	-	A	-	G	G	C	T	T
IRIS_313-9606	NA	C	NA	NA	T	NA	NA	A	NA	T	NA	NA	A	NA	C	DA 11::IRGC 6046-1::[IRIS 313-9606]	IRIS 313-9606	IRGC 124431	ind2	21	C	T	T	-	-	-	C	C	C	T	C	-	-	-	-	A	A	G	C	T	T	-	A	-	G	G	C	T	T
IRIS_313-9609	NA	C	NA	NA	T	NA	NA	A	NA	T	NA	NA	A	NA	C	ARC 10594::IRGC 12524-1::[IRIS 313-9609]	IRIS 313-9609	IRGC 125636	indx	17	C	T	T	-	-	-	C	C	C	T	C	-	-	-	-	A	A	G	C	T	T	-	A	-	G	G	C	T	T
IRIS_313-9882	NA	C	NA	NA	T	NA	NA	A	NA	T	NA	NA	A	NA	C	O. SATIVA::IRGC 17083-1::[IRIS 313-9882]	IRIS 313-9882	IRGC 125863	indx	14	C	T	T	-	-	-	C	C	C	T	C	-	-	-	-	A	A	G	C	T	T	-	A	-	G	G	C	T	T
IRIS_313-9944	NA	C	NA	NA	T	NA	NA	A	NA	T	NA	NA	A	NA	C	SOLOMON RED RICE::IRGC 50950-1::[IRIS 313-9944]	IRIS 313-9944	IRGC 126312	indx	37	C	T	T	-	-	-	C	C	C	T	C	-	-	-	-	A	A	G	C	T	T	-	A	-	G	G	C	T	T
IRIS_313-11128	NA	C/T	NA	NA	T/C	NA	NA	A	NA	T	NA	NA	A	NA	A/C	GOKAUNG::IRGC 33079-2::[IRIS 313-11128]	IRIS 313-11128	IRGC 128045	indx	25	C	T	T	-	-	-	C	C	C	T	C	-	-	-	-	A	A	G	C	T	T	-	A	-	G	G	C	T
B075	NA	C	NA	NA	T/C	NA	NA	A	NA	T	NA	NA	A	NA	A/C	JINBAOYIN::[B075]	B075		indx	11	C	T	T	-	-	-	C	C	C	T	C	-	-	-	-	C	-	G	C	T	T	-	A	-	G	G	C	T
B066	NA	NA	NA	NA	NA	NA	NA	A	NA	C/T	NA	NA	A	NA	A	GUANGKEXIANGNUO::[B066]	B066		temp	105
IRIS_313-9825	NA	NA	NA	NA	T	NA	NA	A	NA	C/T	NA	NA	A	NA	A/C	MOCHICA::IRGC 11070-1::[IRIS 313-9825]	IRIS 313-9825	IRGC 126159	ind2	16	C	T	T	-	-	-	C	C	C	T	C	-	-	-	-	A	A	G	C	T	T	-	A	-	G	G	C	T	T
B130	NA	C	NA	NA	T	NA	NA	A	NA	C/T	NA	NA	A	NA	C	WANLIXIAN::[B130]	B130		ind1A	11.5	C	T	T	-	-	-	C	C	C	T	C	-	-	-	-			G	C	T	T	-	A	-	G	G	C	T	T
CX153	NA	C	NA	NA	T	NA	NA	A	NA	C/T	NA	NA	A	NA	C	JALMAGNA::[CX153]	CX153	IRGC 135951	ind2	13	C	T	T	-	-	-	C	C	C	T	C	-	-	-	-	A	A	G	C	T	T	-	A	-	G	G	C	T	T
IRIS_313-10178	NA	C	NA	NA	T	NA	NA	A	NA	C/T	NA	NA	A	NA	C	GAO JIAO BAI::IRGC 68047-1::[IRIS 313-10178]	IRIS 313-10178	IRGC 125748	ind1A	24	C	T	T	-	-	-	C	C	C	T	C	-	-	-	-	A	A	G	C	T	T	-	A	-	G	G	C	T	T
IRIS_313-10285	NA	C	NA	NA	T	NA	NA	A	NA	C/T	NA	NA	A	NA	C	SICAN::IRGC 117029-1::[IRIS 313-10285]	IRIS 313-10285	IRGC 121119	indx	22	C	T	T	-	-	-	C	C	C	T	C	-	-	-	-	C	-	G	C	T	T	-	A	-	G	G	C	T	T
IRIS_313-11115	NA	C	NA	NA	T	NA	NA	A	NA	C/T	NA	NA	A	NA	A/C	KALA MUNA::IRGC 31832-2::[IRIS 313-11115]	IRIS 313-11115	IRGC 128066	ind2	12	C	T	T	-	-	-	C	C	C	T	C	-	-	-	-	C	-	G	C	T	T	-	A	-	G	G	C	T	T
IRIS_313-11138	NA	C	NA	NA	T	NA	NA	A	NA	C/T	NA	NA	A	NA	A/C	NGASEIN THEEDAT (C 30)::IRGC 33504-2::[IRIS 313-11138]	IRIS 313-11138	IRGC 128119	ind3	1.5	C	T	T	-	-	-	C	C	C	T	C	-	-	-	-	C	-	G	C	T	T	-	A	-	G	G	C	T	T
IRIS_313-12290	NA	C	NA	NA	T	NA	NA	A	NA	C/T	NA	NA	A	NA	C	JON JAN::IRGC 97633-1::[IRIS 313-12290]	IRIS 313-12290	IRGC 127466	indx	23	C	T	T	-	-	-	C	C	C	T	C	-	-	-	-	A	A	G	C	T	T	-	A	-	G	G	C	T	T
IRIS_313-8632	NA	C	NA	NA	T	NA	NA	A	NA	C/T	NA	NA	A	NA	C	PATMADHAI 1::IRGC 77292-1::[IRIS 313-8632]	IRIS 313-8632		ind2	17	C	T	T	-	-	-	C	C	C	T	C	-	-	-	-			G	C	T	T	-	A	-	G	G	C	T	T
IRIS_313-9190	NA	C/T	NA	NA	T/C	NA	NA	A	NA	C/T	NA	NA	A	NA	A/C	CODE NO 31323::IRGC 46907-1::[IRIS 313-9190]	IRIS 313-9190	IRGC 126148	indx	28	C	T	T	-	-	-	C	C	C	T	C	-	-	-	-	A	A	G	C	T	T	-	A	-	G	G	C	T
IRIS_313-9198	NA	C/T	NA	NA	T/C	NA	NA	A	NA	C/T	NA	NA	A	NA	A/C	KHAO PONG AEV::IRGC 29820-1::[IRIS 313-9198]	IRIS 313-9198		ind3	32.5	C	T	T	-	-	-	C	C	C	T	C	-	-	-	-	A	A	G	C	T	T	-	A	-	G	G	C	T	T
B097	NA	T	NA	NA	C	NA	NA	A	NA	C	NA	NA	A	NA	A	JIIENUO::[B097]	B097		indx	59	C	T	T	-	-	-	C	C	C	T	C	-	-	-	-	A	A	G	C	T	T	-	A	-	G	G	C	T	T
IRIS_313-10700	NA	T	NA	NA	C	NA	NA	A	NA	C	NA	NA	A	NA	A	CHANTEK 145::IRGC 14045-1::[IRIS 313-10700]	IRIS 313-10700		ind3	44	C	T	T	-	-	-	C	C	C	T	C	-	-	-	-	C	-	G	C	T	T	-	A	-	G	G	C	T	T
IRIS_313-11082	NA	T	NA	NA	C	NA	NA	A	NA	C	NA	NA	A	NA	A	EA DAM HANG DOK::IRGC 29698-2::[IRIS 313-11082]	IRIS 313-11082	IRGC 128036	ind3	49	C	T	T	-	-	-	C	C	C	T	C	-	-	-	-	C	-	G	C	T	T	-	A	-	G	G	C	T	T
IRIS_313-11254	NA	T	NA	NA	C	NA	NA	A	NA	C	NA	NA	A	NA	A	TIEN SOM::IRGC 40759-2::[IRIS 313-11254]	IRIS 313-11254	IRGC 128186	ind3	53	C	T	T	-	-	-	C	C	C	T	C	-	-	-	-	C	-	G	C	T	T	-	A	-	G	G	C	T	T
IRIS_313-11296	NA	T	NA	NA	C	NA	NA	A	NA	C	NA	NA	A	NA	C	ARC 12800::IRGC 42720-2::[IRIS 313-11296]	IRIS 313-11296	IRGC 127945	indx	50	C	T	T	-	-	-	C	C	C	T	C	-	-	-	-	C	-	G	C	T	T	-	A	-	G	G	C	T	T
IRIS_313-11334	NA	T	NA	NA	C	NA	NA	A	NA	C	NA	NA	A	NA	A	DINGRAS::IRGC 44402-1::[IRIS 313-11334]	IRIS 313-11334		ind3	49.5	C	T	T	-	-	-	C	C	C	T	C	-	-	-	-	A	A	G	C	T	T	-	A	-	G	G	C	T	T
IRIS_313-11338	NA	T	NA	NA	C	NA	NA	A	NA	C	NA	NA	A	NA	A	LOBANG (WHITE)::IRGC 44548-2::[IRIS 313-11338]	IRIS 313-11338	IRGC 128097	indx	133	C	T	T	-	-	-	C	C	C	T	C	-	-	-	-	A	A	G	C	T	C	C	C	C	G	G	C	T	C
IRIS_313-11493	NA	T	NA	NA	C	NA	NA	A	NA	C	NA	NA	A	NA	A	AR 133::IRGC 53942-1::[IRIS 313-11493]	IRIS 313-11493	IRGC 127126	indx	60.5	C	T	T	-	-	-	C	C	C	T	C	-	-	-	-	A	A	G	C	T	T	-	A	-	G	G	C	T	T
IRIS_313-11588	NA	T	NA	NA	C	NA	NA	A	NA	C	NA	NA	A	NA	A	MR 69::IRGC 60188-1::[IRIS 313-11588]	IRIS 313-11588	IRGC 127636	ind3	54.5	C	T	T	-	-	-	C	C	C	T	C	-	-	-	-	A	A	G	C	T	T	-	A	-	G	G	C	T	T
IRIS_313-11711	NA	T	NA	NA	C	NA	NA	A	NA	C	NA	NA	A	NA	A	RAI MAHK MEUANG::IRGC 66154-1::[IRIS 313-11711]	IRIS 313-11711	IRGC 132295	ind3	64.5	C	T	T	-	-	-	C	C	C	T	C	-	-	-	-	A	A	G	C	T	T	-	A	-	G	G	C	T	T
IRIS_313-11757	NA	T	NA	NA	C	NA	NA	A	NA	C	NA	NA	A	NA	A	BORIZINA 640::IRGC 68382-1::[IRIS 313-11757]	IRIS 313-11757	IRGC 131972	ind3	63.5	C	T	T	-	-	-	C	C	C	T	C	-	-	-	-	A	A	G	C	T	T	-	A	-	G	G	C	T	T
IRIS_313-11927	NA	T	NA	NA	C	NA	NA	A	NA	C	NA	NA	A	NA	A	YAH TOW::IRGC 75191-1::[IRIS 313-11927]	IRIS 313-11927	IRGC 127897	ind3	58	C	T	T	-	-	-	C	C	C	T	C	-	-	-	-	A	A	G	C	T	T	-	A	-	G	G	C	T	T
IRIS_313-12072	NA	T	NA	NA	C	NA	NA	A	NA	C	NA	NA	A	NA	A	KYAUK KYI::IRGC 82773-1::[IRIS 313-12072]	IRIS 313-12072	IRGC 135766	indx	58	C	T	T	-	-	-	C	C	C	T	C	-	-	-	-	C	-	G	C	T	T	-			G	G	C	T	T
IRIS_313-12146	NA	T	NA	NA	C	NA	NA	A	NA	C	NA	NA	A	NA	A	AM BEUS::IRGC 87189-1::[IRIS 313-12146]	IRIS 313-12146	IRGC 127121	indx	55.5	C	T	T	-	-	-	C	C	C	T	C	-	-	-	-	A	A	G	C	T	T	-	A	-	G	G	C	T	T
IRIS_313-12207	NA	T	NA	NA	C	NA	NA	A	NA	C	NA	NA	A	NA	A	SALA::IRGC 90457-1::[IRIS 313-12207]	IRIS 313-12207	IRGC 128456	indx	52.5	C	T	T	-	-	-	C	C	C	T	C	-	-	-	-	A	A	G	C	T	T	-	A	-	G	G	C	T	T
IRIS_313-12246	NA	T	NA	NA	C	NA	NA	A	NA	C	NA	NA	A	NA	A	BANGKOUY::IRGC 94037-1::[IRIS 313-12246]	IRIS 313-12246	IRGC 127208	ind3	49.5	C	T	T	-	-	-	C	C	C	T	C	-	-	-	-	C	-	G	C	T	T	-	A	-	G	G	C	T	T
IRIS_313-12247	NA	T	NA	NA	C	NA	NA	A	NA	C	NA	NA	A	NA	A	DAMNOEUB KRAMOUM::IRGC 94084-2::[IRIS 313-12247]	IRIS 313-12247	IRGC 128026	ind3	52	C	T	T	-	-	-	C	C	C	T	C	-	-	-	-	A	A	G	C	T	T	-	A	-	G	G	C	T	T
IRIS_313-12260	NA	T	NA	NA	C	NA	NA	A	NA	C	NA	NA	A	NA	A	EA KHAW NGAN::IRGC 95176-2::[IRIS 313-12260]	IRIS 313-12260	IRGC 128037	ind3	60	C	T	T	-	-	-	C	C	C	T	C	-	-	-	-	A	A	G	C	T	T	-	A	-	G	G	C	T	T
IRIS_313-12301	NA	T	NA	NA	C	NA	NA	A	NA	C	NA	NA	A	NA	A	LG 10178::IRGC 98526-1::[IRIS 313-12301]	IRIS 313-12301	IRGC 127556	indx	50.5	C	T	T	-	-	-	C	C	C	T	C	-	-	-	-	A	A	G	C	T	T	-	A	-	G	G	C	T	T
IRIS_313-12302	NA	T	NA	NA	C	NA	NA	A	NA	C	NA	NA	A	NA	A	LG 4153::IRGC 98528-1::[IRIS 313-12302]	IRIS 313-12302	IRGC 127560	ind3	56.5	C	T	T	-	-	-	C	C	C	T	C	-	-	-	-	A	A	G	C	T	T	-	A	-	G	G	C	T	T
IRIS_313-8315	NA	T	NA	NA	C	NA	NA	A	NA	C	NA	NA	A	NA	A	ARC 11867::IRGC 40978-1::[IRIS 313-8315]	IRIS 313-8315		indx	55.5	C	T	T	-	-	-	C	C	C	T	C	-	-	-	-	A	A	G	C	T	T	-	A	-	G	G	C	T	T
IRIS_313-8466	NA	T	NA	NA	C	NA	NA	A	NA	C	NA	NA	A	NA	A	CHAW GAM PRUED::IRGC 71103-1::[IRIS 313-8466]	IRIS 313-8466		ind3	48.5	C	T	T	-	-	-	C	C	C	T	C	-	-	-	-	A	A	G	C	T	T	-	A	-	G	G	C	T	T
IRIS_313-8946	NA	T	NA	NA	C	NA	NA	A	NA	C	NA	NA	A	NA	A	ARC 11524::IRGC 42672-1::[IRIS 313-8946]	IRIS 313-8946	IRGC 125641	indx	49.5	C	T	T	-	-	-	C	C	C	T	C	-	-	-	-	C	-	G	C	T	T	-	A	-	G	G	C	T	T
B077	NA	NA	NA	NA	NA	NA	NA	A	NA	C	NA	NA	A	NA	A	YIZHIXIANG::[B077]	B077		temp	107
B100	NA	NA	NA	NA	NA	NA	NA	A	NA	C	NA	NA	A	NA	A	HONGKEZHENUO::[B100]	B100		temp	111
B118	NA	NA	NA	NA	NA	NA	NA	A	NA	C	NA	NA	A	NA	A	ERGANGAI::[B118]	B118		indx	102											C	-	-	-	-
B136	NA	NA	NA	NA	NA	NA	NA	A	NA	C	NA	NA	A	NA	A	YUYANNUO::[B136]	B136		japx	90
B223	NA	NA	NA	NA	NA	NA	NA	A	NA	C	NA	NA	A	NA	A	CUNGUNUO::[B223]	B223		temp	101
B225	NA	NA	NA	NA	NA	NA	NA	A	NA	C	NA	NA	A	NA	A	GUANTUIBAIHE 1::[B225]	B225		temp	130.5
IRIS_313-11073	NA	NA	NA	NA	NA	NA	NA	A	NA	C	NA	NA	A	NA	A	KHAO DAM::IRGC 29481-3::[IRIS 313-11073]	IRIS 313-11073	IRGC 132272	subtrop	66
IRIS_313-11900	NA	NA	NA	NA	NA	NA	NA	A	NA	C	NA	NA	A	NA	A	PLE LIA::IRGC 73562-1::[IRIS 313-11900]	IRIS 313-11900	IRGC 128435	subtrop	129
IRIS_313-11922	NA	NA	NA	NA	NA	NA	NA	A	NA	C	NA	NA	A	NA	A	KHAO' NAN::IRGC 74981-1::[IRIS 313-11922]	IRIS 313-11922	IRGC 128340	subtrop	119.5
IRIS_313-12337	NA	NA	NA	NA	NA	NA	NA	A	NA	C	NA	NA	A	NA	A	DOK HIEN NOI::IRGC 107021-1::[IRIS 313-12337]	IRIS 313-12337	IRGC 127335	subtrop	93.5
IRIS_313-12353	NA	NA	NA	NA	NA	NA	NA	A	NA	C	NA	NA	A	NA	A	MOK::IRGC 107804-1::[IRIS 313-12353]	IRIS 313-12353	IRGC 132017	subtrop	87
IRIS_313-8578	NA	NA	NA	NA	NA	NA	NA	A	NA	C	NA	NA	A	NA	A	KHAU TRA BONG::IRGC 78342-1::[IRIS 313-8578]	IRIS 313-8578	IRGC 125992	subtrop	86.5
IRIS_313-8735	NA	NA	NA	NA	NA	NA	NA	A	NA	C	NA	NA	A	NA	A	NEP NGAU::IRGC 78369-1::[IRIS 313-8735]	IRIS 313-8735	IRGC 126074	japx	89.5	C	T	T	-	-	-	C	C	C	T	C	-	-	-	-										G	G	C	T	T
IRIS_313-8883	NA	NA	NA	NA	NA	NA	NA	A	NA	C	NA	NA	A	NA	A	LOMPUG::IRGC 71559-1::[IRIS 313-8883]	IRIS 313-8883		japx	94.5
IRIS_313-9317	NA	NA	NA	NA	NA	NA	NA	A	NA	C	NA	NA	A	NA	A	VEN THAP::IRGC 56138-1::[IRIS 313-9317]	IRIS 313-9317	IRGC 125933	indx	91
CX17	NA	C	NA	NA	T	NA	NA	A	NA	C	NA	NA	A	NA	A	YUEXIANGZHAN::[CX17]	CX17		indx	4	C	T	T	-	-	-	C	C	C	T	C	-	-	-	-	C	-	G	C	T	T	-	A	-	G	G	C	T	T
IRIS_313-10191	NA	C	NA	NA	T	NA	NA	A	NA	C	NA	NA	A	NA	A	MIN KE ZHAN::IRGC 72230-1::[IRIS 313-10191]	IRIS 313-10191	IRGC 125841	ind1A	4	C	T	T	-	-	-	C	C	C	T	C	-	-	-	-	C	-	G	C	T	T	-	A	-	G	G	C	T	T
IRIS_313-10562	NA	C	NA	NA	T	NA	NA	A	NA	C	NA	NA	A	NA	A	SENG CHUI LIN::IRGC 7313-1::[IRIS 313-10562]	IRIS 313-10562	IRGC 128463	japx	16	C	T	T	-	-	-	C	C	C	T	C	-	-	-	-	C	-	G	C	T	T	-	A	-	G	G	C	T	T
IRIS_313-11563	NA	C	NA	NA	T	NA	NA	A	NA	C	NA	NA	A	NA	A	BIJULI BATI::IRGC 58917-1::[IRIS 313-11563]	IRIS 313-11563	IRGC 127227	ind2	18	C	T	T	-	-	-	C	C	C	T	C	-	-	-	-	A	A	G	C	T	T	-	A	-	G	G	C	T	T
IRIS_313-11967	NA	C	NA	NA	T	NA	NA	A	NA	C	NA	NA	A	NA	A	TANG DU GU::IRGC 77400-1::[IRIS 313-11967]	IRIS 313-11967	IRGC 127846	indx	12	C	T	T	-	-	-	C	C	C	T	C	-	-	-	-	A	A	G	C	T	T	-	A	-	G	G	C	T	T
IRIS_313-8982	NA	C	NA	NA	T	NA	NA	A	NA	C	NA	NA	A	NA	A	ARC 18112::IRGC 42274-1::[IRIS 313-8982]	IRIS 313-8982	IRGC 125655	indx	16	C	T	T	-	-	-	C	C	C	T	C	-	-	-	-	A	A	G	C	T	T	-	A	-	G	G	C	T	T
IRIS_313-11549	NA	T	NA	NA	T/C	NA	NA	A	NA	C	NA	NA	A	NA	A	TAUNGYA SABA::IRGC 58226-1::[IRIS 313-11549]	IRIS 313-11549	IRGC 128483	indx	43	C	T	T	-	-	-	C	C	C	T	C	-	-	-	-	C	-	G	C	T	T	-	A	-	G	G	C	T	T
IRIS_313-10513	NA	T	NA	NA	C	NA	NA	A	NA		NA	NA	A	NA	A	LUBANG PUTI::IRGC 5429-1::[IRIS 313-10513]	IRIS 313-10513	IRGC 127579	indx	71	C	T	T	-	-	-	C	C	C	T	C	-	-	-	-			G	C	T	T	-	A	-	G	G	C	T	C
IRIS_313-11330	NA	T	NA	NA	C	NA	NA	A	NA		NA	NA	A	NA	A	ALAMINOS::IRGC 44268-2::[IRIS 313-11330]	IRIS 313-11330	IRGC 132236	ind3	83	C	T	T	-	-	-	C	C	C	T	C	-	-	-	-	A	A	G	C	T	T	-			G	G	C	T	C
IRIS_313-11341	NA	T	NA	NA	C	NA	NA	A	NA		NA	NA	A	NA	A	MINDANAO::IRGC 44642-2::[IRIS 313-11341]	IRIS 313-11341	IRGC 128110	ind3	79	C	T	T	-	-	-	C	C	C	T	C	-	-	-	-	C	-	G	C	T					G	G	C	T	C
B103	NA	NA	NA	NA	NA	NA	NA	A	NA		NA	NA	A	NA	A	LAOHONGDAO::[B103]	B103		temp	85.5	C	T	T	-	-	-	C	C	C	T	C	-	-	-	-	C	-								G	G	C	T
B110	NA	NA	NA	NA	NA	NA	NA	A	NA		NA	NA	A	NA	A	HUANGPINUO::[B110]	B110		temp	97																		G	C	T	T	-	A	-
B148	NA	NA	NA	NA	NA	NA	NA	A	NA		NA	NA	A	NA	A	LENGSHUINUO::[B148]	B148		japx	81.5
B199	NA	NA	NA	NA	NA	NA	NA	A	NA		NA	NA	A	NA	A	HONGMISANDAN::[B199]	B199		temp	108.5
B218	NA	NA	NA	NA	NA	NA	NA	A	NA		NA	NA	A	NA	A	WUZIDUI::[B218]	B218		temp	126
IRIS_313-11984	NA	NA	NA	NA	NA	NA	NA	A	NA		NA	NA	A	NA	A	BLAU BLA::IRGC 78460-1::[IRIS 313-11984]	IRIS 313-11984		temp	114.5
IRIS_313-12307	NA	NA	NA	NA	NA	NA	NA	A	NA		NA	NA	A	NA	A	POU::IRGC 98968-1::[IRIS 313-12307]	IRIS 313-12307	IRGC 132034	subtrop	126.5
IRIS_313-8011	NA	NA	NA	NA	NA	NA	NA	A	NA		NA	NA	A	NA	A	VIETNAM 1::C1::[IRIS 313-8011]	IRIS 313-8011	IRGC 122281	subtrop	112.5
B111	NA	C	NA	NA	NA	NA	NA	A	NA		NA	NA	A	NA	A	ZIMANGFEIE::[B111]	B111		temp	111	C	T	T	-	-	-	C	C	C	T															G	G	C	T
B212	NA	C	NA	NA	NA	NA	NA	A	NA		NA	NA	A	NA	A	CHIKENUO::[B212]	B212		temp	114
IRIS_313-8244	NA	C/T	NA	NA	T	NA	NA	G	NA	T	NA	NA	G	NA	C	POKKALI::IRGC 8948-1::[IRIS 313-8244]	IRIS 313-8244	IRGC 126002	ind2	19	C	T	T	-	-	-	C	C	C	T	C	-	-	-	-	C	-	G	C	T	T	-	A	-	G	G	C	T	T
IRIS_313-10539	NA	C	NA	NA	T	NA	NA	G	NA	T	NA	NA	G	NA	C	BADAL 76::IRGC 6586-1::[IRIS 313-10539]	IRIS 313-10539	IRGC 127199	ind2	6	C	T	T	-	-	-	C	C	C	T	C	-	-	-	-	C	-	G	C	T	T	-	A	-	G	G	C	T	T
IRIS_313-11119	NA	C	NA	NA	T	NA	NA	G	NA	T	NA	NA	G	NA	C	NEP BUNG::IRGC 32207-1::[IRIS 313-11119]	IRIS 313-11119		indx	15	C	T	T	-	-	-	C	C	C	T	C	-	-	-	-	C	-	G	C	T	T	-	A	-	G	G	C	T	T
IRIS_313-9067	NA	C	NA	NA	T	NA	NA	G	NA	T	NA	NA	G	NA	C	BHOJON KOLPO::IRGC 31727-1::[IRIS 313-9067]	IRIS 313-9067	IRGC 125681	ind2	29	C	T	T	-	-	-	C	C	C	T	C	-	-	-	-	A	A	G	C	T	T	-	A	-	G	G	C	T	T
IRIS_313-9637	NA	C	NA	NA	T	NA	NA	G	NA	T	NA	NA	G	NA	C	BONG BOI::IRGC 32094-1::[IRIS 313-9637]	IRIS 313-9637	IRGC 125689	ind3	22	C	T	T	-	-	-	C	C	C	T	C	-	-	-	-	A	A	G	C	T	T	-	A	-	G	G	C	T	T
IRIS_313-9160	NA	T	NA	NA	C	NA	NA	G	NA	C/T	NA	NA	G	NA	A	THIERNO BANDE::IRGC 16009-1::[IRIS 313-9160]	IRIS 313-9160	IRGC 125922	ind3	137	C	T	T	-/C	-/C	-/C	C	C	C	T	C	-/C	-/C	-/C	-	A	A	G	C	T	T	-	A	-/C	G	G	C	T	C
CX280	NA	C	NA	NA	T	NA	NA	G	NA	C/T	NA	NA	G	NA		MARAVILHA::[CX280]	CX280	IRGC 135981	admix	0	C	T	T	-	-	-	C	C	C	T	C	-	-	-	-	C	-	G	C	T	T	-	A	-	G	G	C	T	T
B019	NA	T	NA	NA	C	NA	NA	G	NA	C	NA	NA	G	NA	A	BULEIDA A-75::[B019]	B019	IRGC 135852	indx	89	C	T	C	C	C	C	C	C	C	T	C	-	-	-	-	A	A	G	C	T			A	-	G	G	C	T	C
B027	NA	T	NA	NA	C	NA	NA	G	NA	C	NA	NA	G	NA	A	C 894-21::[B027]	B027	IRGC 135858	ind3	86	C	T	T	-	-	-	C	C	C	T	C	-	-	-	-	A	A	G	C	T	T	-	A	-	G	G	C	T	C
B032	NA	T	NA	NA	C	NA	NA	G	NA	C	NA	NA	G	NA	A	ROHINI::[B032]	B032	IRGC 136034	ind1B	115.5	C	T	T	-	-	-	C	C	C	T	C	-	-	-	-	C	-	G	C	T	T	-	C	C	G	G	C	T	C
B067	NA	T	NA	NA	C	NA	NA	G	NA	C	NA	NA	G	NA	A	FUNINGZIPIGENGZI::[B067]	B067		ind1A	69	C	T	T	-	-	-	C	C	C	T	C	-	-	-	-	C	-	G	C	T	T	-	A	-	G	G	C	T	C
B123	NA	T	NA	NA	C	NA	NA	G	NA	C	NA	NA	G	NA	A	ZAOSHUXIANGHEIMI::[B123]	B123		indx	77.5	C	T	C	C	C	C	C	C	C	T	C	-	-	-	-	C	-/A	G	C	T	T	-/A	C	A/C	G	G	C	T	T/C
B128	NA	T	NA	NA	C	NA	NA	G	NA	C	NA	NA	G	NA	A	SIBEITIZHAO 6::[B128]	B128		indx	78.5	C	T	C	C	C	C	C	C	C	T	C	-	-	-	-	C	-	G	C	T	T	-	A	-	G	G	C	T	C
B137	NA	T	NA	NA	C	NA	NA	G	NA	C	NA	NA	G	NA		80B::[B137]	B137		indx	54											C	-	-	-	-	C	-						A	-	G	G	C	T	C
B146	NA	T	NA	NA	C	NA	NA	G	NA	C	NA	NA	G	NA	A	JWR 221::[B146]	B146		ind1B	60	C	T	T	-	-	-	C	C	C	T	T	T	A	G	A	C	-	G	C	T	T	-	A	-	G	G	C	T	C
B164	NA	T	NA	NA	C	NA	NA	G	NA	C	NA	NA	G	NA	A	QINGKE::[B164]	B164		aus	78.5	C	T	T	-	-	-	C	C	C	T	T	T	A	G	A	C	-	G	C	T	T	-	A	-	G	G	C	T	C
B180	NA	T	NA	NA	C	NA	NA	G	NA	C	NA	NA	G	NA	A	P1790-5-1M-4-5M-1B-3M-B::[B180]	B180	IRGC 136016	indx	82																		G	C	T	T	-	A	-	G	G	C	T	C
B193	NA	T	NA	NA	C	NA	NA	G	NA	C	NA	NA	G	NA	A	C.MEDIO 7::[B193]	B193	IRGC 135869	indx	70	C	T	C	C	C	C	C	C	C	T	C	-	-	-	-	A	A	G	C	T	T	-	A	-	G	G	C	T
B197	NA	T	NA	NA	C	NA	NA	G	NA	C	NA	NA	G	NA	A	TAIZHONGXIANXUAN 2::[B197]	B197		ind1A	127	C	T	C	C	C	C	C	C	C	T	T	T	A	G	A	A	A	G	C	T			A	-	G	G	C	T	C
B217	NA	T	NA	NA	C	NA	NA	G	NA	C	NA	NA	G	NA	A	HONGGU::[B217]	B217		ind1B	137	C	T	C	C	C	C	C	C	C	T	T	T	A	G	A	A	A	G	C	T	T	-	C	C	G	G	C	T	C
B232	NA	T	NA	NA	C	NA	NA	G	NA	C	NA	NA	G	NA	A	XIANGAIZAO 10HAO::[B232]	B232		ind1B	81	C	T	C	C	C	C	C	C	C	T	C	-	-	-	-	A	A	G	C	T	T	-	A	-	G	G	C	T	C
B243	NA	T	NA	NA	C	NA	NA	G	NA	C	NA	NA	G	NA	A	HUHUI 91269::[B243]	B243	IRGC 135910	aus	118	C	T	T	-	-	-	C	C	C	T	C	-	-	-	-	A	A	G	C	T	T	-			G	G	C	T	C
B252	NA	T	NA	NA	C	NA	NA	G	NA	C	NA	NA	G	NA	A	XIANGAI B::[B252]	B252		indx	114	C	T	C	C	C	C	C	C	C	T	T	T	A	G	A	A	A	G	C	T	T	-	A	-	G	G	C	T	C
B267	NA	T	NA	NA	C	NA	NA	G	NA	C	NA	NA	G	NA	A	NON SPECIFIED::[B267]	B267		indx	69	C	T	C	C	C	C	C	C	C	T	C	-	-	-	-	C	-	G	C	T			A	-	G	G	C	T	C
CX110	NA	T	NA	NA	C	NA	NA	G	NA	C	NA	NA	G	NA	A	UP15::[CX110]	CX110	IRGC 136062	aro	110	C	T	T	-	-	-	C	C	C	T	C	-	-	-	-	A	A	G	C	T	T	-			G	G	C	T	C
CX112	NA	T	NA	NA	C	NA	NA	G	NA	C	NA	NA	G	NA	A	GINGA::[CX112]	CX112	IRGC 135893	admix	121	C	T					C	C	C	T	T	T	A	G	A	A	A	G	C	T	T	-	A	-	G	G	C	T	C
CX122	NA	T	NA	NA	C	NA	NA	G	NA	C	NA	NA	G	NA	A	TAI-ZHONG-XIAN 10::[CX122]	CX122		indx	69.5	C	T	T	-	-	-	C	C	C	T	C	-	-	-	-	C	-	G	C	T			A	-	G	G	C	T
CX126	NA	T	NA	NA	C	NA	NA	G	NA	C	NA	NA	G	NA	A	IRBB60::[CX126]	CX126	IRGC 135946	ind1B	71.5	C	T	T	-	-	-	C	C	C	T	C	-	-	-	-	C	-	G	C	T	C	C	A	-	G	G	C	T	C
CX134	NA	T	NA	NA	C	NA	NA	G	NA	C	NA	NA	G	NA	A	IRBB7::[CX134]	CX134	IRGC 135948	ind1B	110.5	C	T	C	C	C	C	C	C	C	T	T	T	A	G	A	A	A	G	C	T			A	-	G	G	C	T	C
CX141	NA	T	NA	NA	C	NA	NA	G	NA	C	NA	NA	G	NA	A	PADI SIAM KUNING::[CX141]	CX141	IRGC 136019	ind3	121	C	T	C	C	C	C	C	C	C	T	C	-	-	-	-	C	-	G	C	T	T	-	A	-	G	G	C	T	C
CX144	NA	T	NA	NA	C	NA	NA	G	NA	C	NA	NA	G	NA	A	HTA7204::[CX144]	CX144	IRGC 135906	indx	79	C	T	T	-	-	-	C	C	C	T	C	-	-	-	-	A	A	G	C	T	T	-			G	G	C	T	C
CX149	NA	T	NA	NA	C	NA	NA	G	NA	C	NA	NA	G	NA	A	KARNAL LOCAL::[CX149]	CX149		aro	124	C	T	C	C	C	C	C	C	C	T	T	T	A	G	A	A	A	G	C	T	T	-	A	-	G	G	C	T	C
CX150	NA	T	NA	NA	C	NA	NA	G	NA	C	NA	NA	G	NA	A	CHOROFA::[CX150]	CX150	IRGC 135865	ind1B	106	C	T	C	C	C	C	C	C	C	T	T	T	A	G	A	C	-	G	C	T	T	-	A	-	G	G	C	T	C
CX152	NA	T	NA	NA	C	NA	NA	G	NA	C	NA	NA	G	NA	A	CISADANE::[CX152]	CX152	IRGC 135866	ind1B	131	C	T	T	-	-	-	C	C	C	T	T	T	A	G	A	A	A	G	C	T	T	-	A	-	G	G	C	T	C
CX154	NA	T	NA	NA	C	NA	NA	G	NA	C	NA	NA	G	NA	A	KHAO DAWK MALI 105::[CX154]	CX154	IRGC 135967	ind3	133.5	C	T	C	C	C	C	C	C	C	T	C	-	-	-	-	A	A	G	C	T	T	-	A	-	G	G	C	T	C
CX182	NA	T	NA	NA	C	NA	NA	G	NA	C	NA	NA	G	NA	A	SLG1::[CX182]	CX182	IRGC 136047	indx	102.5	C	T	C	C	C	C	C	C	C	T	C	-/T	-/A	-/G	-/A	C	-/T	G	C	T	C	C/T	A	-/T	G	G	C	T	T/C
CX21	NA	T	NA	NA	C	NA	NA	G	NA	C	NA	NA	G	NA	A	BG90-2::[CX21]	CX21	IRGC 135842	ind1B	53	C	T	T	-	-	-	C	C	C	T						C	-	G	C	T	T	-	A	-	G	G	C	T	C
CX218	NA	T	NA	NA	C	NA	NA	G	NA	C	NA	NA	G	NA	A	TYPE3::[CX218]	CX218	IRGC 136061	ind1B	95	C	T	T	-	-	-	C	C	C	T	T	T	A	G	A	C	-	G	C	T	T	-	A	-	G	G	C	T	C
CX22	NA	T	NA	NA	C	NA	NA	G	NA	C	NA	NA	G	NA	A	PR106::[CX22]	CX22	IRGC 136022	ind1B	87.5	C	T	T	-	-	-	C	C	C	T	C	-	-	-	-	C	-	G	C	T	C	C	A	-	G	G	C	T	C
CX221	NA	T	NA	NA	C	NA	NA	G	NA	C	NA	NA	G	NA	A	ZHONGYOUZAO 81::[CX221]	CX221	IRGC 136095	indx	122	C	T	C	C	C	C	C	C	C	T	T	T	A	G	A	C	-	G	C	T	T	-	A	-	G	G	C	T	C
CX230	NA	T	NA	NA	C	NA	NA	G	NA	C	NA	NA	G	NA	A	IR64-IL::[CX230]	CX230	IRGC 135929	ind1B	125	C	T	C	C	C	C	C	C	C	T	C	-	-	-	-	A	A	G	C	T	C	C	C	C	G	G	C	T	C
CX231	NA	T	NA	NA	C	NA	NA	G	NA	C	NA	NA	G	NA	A	IR52561-UBN-1-1-2::[CX231]	CX231	IRGC 135923	indx	102	C	T	T	-	-	-	C	C	C	T	C	-	-	-	-	C	-	G	C	T	C	C	A	-	G	G	C	T	C
CX235	NA	T	NA	NA	C	NA	NA	G	NA	C	NA	NA	G	NA	A	NSIC RC9 (APO)::[CX235]	CX235	IRGC 136013	indx	137	C	T	C	C	C	C	C	C	C	T	T	T	A	G	A	C	-	G	C	T	C	C	C	C	G	G	C	T	C
CX24	NA	T	NA	NA	C	NA	NA	G	NA	C	NA	NA	G	NA	A	TKM 9::[CX24]	CX24	IRGC 136058	indx	87	C	T	C	C	C	C	C	C	C	T	C	-	-	-	-	C	-	G	C	T	T	-	A	-	G	G	C	T	C
CX240	NA	T	NA	NA	C	NA	NA	G	NA	C	NA	NA	G	NA	A	CARIJO::[CX240]	CX240	IRGC 135859	indx	123	C	T	C	C	C	C	C	C	C	T	T	T	A	G	A	A	A	G	C	T	T	-	A	-	G	G	C	T	C
CX25	NA	T	NA	NA	C	NA	NA	G	NA	C	NA	NA	G	NA	A	CISANGGARUNG::[CX25]	CX25	IRGC 135867	ind1B	61	C	T	T	-	-	-	C	C	C	T	C	-	-	-	-	A	A	G	C	T	T	-	A	-	G	G	C	T	T/C
CX273	NA	T	NA	NA	C	NA	NA	G	NA	C	NA	NA	G	NA	A	NONA BOKRA::[CX273]	CX273		indx	123	C	T	C	C	C	C	C	C	C	T	T	T	A	G	A	A	A	G	C	T	C	C	C	C	G	G	C	T	C
CX274	NA	T	NA	NA	C	NA	NA	G	NA	C	NA	NA	G	NA	A	IR26::[CX274]	CX274	IRGC 135919	indx	116	C	T	C	C	C	C	C	C	C	T	T	T	A	G	A	A	A	G	C	T	T	-	C	C	G	G	C	T	C
CX304	NA	T	NA	NA	C	NA	NA	G	NA	C	NA	NA	G	NA	A	LUYIN 46::[CX304]	CX304	IRGC 135975	indx	135	C	T	T	-	-	-	C	C	C	T	T	T	A	G	A	A	A	G	C	T	T	-	A	-	G	G	C	T
CX305	NA	T	NA	NA	C	NA	NA	G	NA	C	NA	NA	G	NA	A	ZH5::[CX305]	CX305	IRGC 136090	ind1B	101	C	T	C	C	C	C	C	C	C	T	T	T	A	G	A	A	A	G	C	T	C	C	C	C	G	G	C	T	C
CX314	NA	T	NA	NA	C	NA	NA	G	NA	C	NA	NA	G	NA	A	117::[CX314]	CX314	IRGC 135813	ind1B	119	C	T	C	C	C	C	C	C	C	T	T	T	A	G	A	C	-	G	C	T	T	-	A	-	G	G	C	T	C
CX319	NA	T	NA	NA	C	NA	NA	G	NA	C	NA	NA	G	NA	A	MENGGUANDAMAGU::[CX319]	CX319		indx	93	C	T	T	-	-	-	C	C	C	T	T	T	A	G	A	A	A	G	C	T	T	-			G	G	C	T	C
CX340	NA	T	NA	NA	C	NA	NA	G	NA	C	NA	NA	G	NA	A	HUA 564::[CX340]	CX340	IRGC 135907	ind1B	95	C	T	T	-	-	-	C	C	C	T	T	T	A	G	A	C	-	G	C	T	T	-	C	C	G	G	C	T	C
CX343	NA	T	NA	NA	C	NA	NA	G	NA	C	NA	NA	G	NA	A	WANXIAN 77::[CX343]	CX343	IRGC 136069	indx	65	C	T	T	-	-	-	C	C	C	T	C	-	-	-	-	A	A	G	C	T	C	C			G	G	C	T
CX361	NA	T	NA	NA	C	NA	NA	G	NA	C	NA	NA	G	NA	A	G341::[CX361]	CX361		ind1B	90											C	-	-	-	-	C	-	G	C	T	T	-	C	C	G	G	C	T	C
CX362	NA	T	NA	NA	C	NA	NA	G	NA	C	NA	NA	G	NA	A	YZX1::[CX362]	CX362		ind1B	116	C	T	C	C	C	C	C	C	C	T	T	T	A	G	A	C	-	G	C	T			A	-	G	G	C	T	C
CX363	NA	T	NA	NA	C	NA	NA	G	NA	C	NA	NA	G	NA	A	YZX2::[CX363]	CX363		indx	92	C	T	C	C	C	C	C	C	C	T	C	-	-	-	-	A	A	G	C	T	T	-	A	-	G	G	C	T
CX368	NA	T	NA	NA	C	NA	NA	G	NA	C	NA	NA	G	NA	A	N22::[CX368]	CX368	IRGC 135996	aus	56	C	T	T	-	-	-	C	C	C	T	C	-	-	-	-			G	C	T	T	-	A	-	G	G	C	T	C
CX369	NA	T	NA	NA	C	NA	NA	G	NA	C	NA	NA	G	NA	A	IRBB62::[CX369]	CX369	IRGC 135947	ind1B	107.5	C	T	C	C	C	C	C	C	C	T	T	T	A	G	A	A	A	G	C	T	T	-	A	-	G	G	C	T	C
CX375	NA	T	NA	NA	C	NA	NA	G	NA	C	NA	NA	G	NA	A	NERICA-L-1::[CX375]	CX375	IRGC 136004	ind1B	95	C	T	T	-	-	-	C	C	C	T						C	-								G	G	C	T	C
CX382	NA	T	NA	NA	C	NA	NA	G	NA	C	NA	NA	G	NA	A	KOGOMG 1-1::[CX382]	CX382	IRGC 135971	ind1B	68	C	T	T	-	-	-	C	C	C	T	C	-	-	-	-	C	-	G	C	T	T	-	A	-	G	G	C	T	C
CX386	NA	T	NA	NA	C	NA	NA	G	NA	C	NA	NA	G	NA	A	NPT-114::[CX386]	CX386	IRGC 136012	indx	64	C	T	T	-	-	-	C	C	C	T	C	-	-	-	-	C	-	G	C	T	T	-	A	-	G	G	C	T	C
CX392	NA	T	NA	NA	C	NA	NA	G	NA	C	NA	NA	G	NA	A	SARD::[CX392]	CX392	IRGC 136043	indx	118	C	T	T	-	-	-	C	C	C	T	C	-	-	-	-	C	-						A	-	G	G	C	T	C
CX394	NA	T	NA	NA	C	NA	NA	G	NA	C	NA	NA	G	NA	A	MOLIZHANXUAN::[CX394]	CX394	IRGC 135985	ind1B	90.5	C	T	T	-	-	-	C	C	C	T	C	-	-	-	-	A	A	G	C	T	T	-	A	-	G	G	C	T	C
CX408	NA	T	NA	NA	C	NA	NA	G	NA	C	NA	NA	G	NA	A	CX408::[CX408]	CX408		ind1B	125	C	T	C	C	C	C	C	C	C	T	C	-	-	-	-	A	A	G	C	T	T	-	A	-	G	G	C	T	C
CX409	NA	T	NA	NA	C	NA	NA	G	NA	C	NA	NA	G	NA	A	CX409::[CX409]	CX409		ind1B	144	C	T	C	C	C	C	C	C	C	T	C	-	-	-	-	A	A	G	C	T	T	-	C	C	G	G	C	T	C
CX410	NA	T	NA	NA	C	NA	NA	G	NA	C	NA	NA	G	NA	A	CX410::[CX410]	CX410		ind1B	149	C	T	T	-	-	-	C	C	C	T	T	T	A	G	A	A	A	G	C	T	C	C	A	-	G	G	C	T	C
CX411	NA	T	NA	NA	C	NA	NA	G	NA	C	NA	NA	G	NA	A	CX411::[CX411]	CX411		ind1B	110	C	T	C	C	C	C	C	C	C	T	T	T	A	G	A	C	-	G	C	T	C	C	C	C	G	G	C	T	C
CX413	NA	T	NA	NA	C	NA	NA	G	NA	C	NA	NA	G	NA	A	CX413::[CX413]	CX413		ind1B	95	C	T	T	-	-	-	C	C	C	T	C	-	-	-	-	A	A	G	C	T	T	-	A	-	G	G	C	T	C
CX414	NA	T	NA	NA	C	NA	NA	G	NA	C	NA	NA	G	NA	A	CX414::[CX414]	CX414		ind1B	134	C	T	C	C	C	C	C	C	C	T	C	-	-	-	-	A	A	G	C	T	T	-	A	-	G	G	C	T	C
CX416	NA	T	NA	NA	C	NA	NA	G	NA	C	NA	NA	G	NA	A	CX416::[CX416]	CX416		ind1B	116	C	T	T	-	-	-	C	C	C	T	C	-	-	-	-	A	A	G	C	T	C	C	C	C	G	G	C	T	C
CX417	NA	T	NA	NA	C	NA	NA	G	NA	C	NA	NA	G	NA	A	CX417::[CX417]	CX417		ind1B	118	C	T	C	C	C	C	C	C	C	T	T	T	A	G	A	C	-	G	C	T	T	-	C	C	G	G	C	T	C
CX418	NA	T	NA	NA	C	NA	NA	G	NA	C	NA	NA	G	NA	A	CX418::[CX418]	CX418		ind1B	138	C	T	C	C	C	C	C	C	C	T	T	T	A	G	A	A	A	G	C	T	T	-	A	-	G	G	C	T	C
CX419	NA	T	NA	NA	C	NA	NA	G	NA	C	NA	NA	G	NA	A	CX419::[CX419]	CX419		ind1B	103	C	T	C	C	C	C	C	C	C	T	T	T	A	G	A	A	A	G	C	T	T	-	A	-	G	G	C	T	C
CX420	NA	T	NA	NA	C	NA	NA	G	NA	C	NA	NA	G	NA	A	CX420::[CX420]	CX420		ind1B	124	C	T	T	-	-	-	C	C	C	T	C	-	-	-	-	A	A	G	C	T	C	C	C	C	G	G	C	T	C
CX421	NA	T	NA	NA	C	NA	NA	G	NA	C	NA	NA	G	NA	A	CX421::[CX421]	CX421		ind1B	94	C	T	T	-	-	-	C	C	C	T	T	T	A	G	A	C	-	G	C	T	T	-	C	C	G	G	C	T	C
CX422	NA	T	NA	NA	C	NA	NA	G	NA	C	NA	NA	G	NA	A	CX422::[CX422]	CX422		ind1B	104	C	T	T	-	-	-	C	C	C	T	C	-	-	-	-	A	A	G	C	T	T	-	C	C	G	G	C	T	C
CX423	NA	T	NA	NA	C	NA	NA	G	NA	C	NA	NA	G	NA	A	CX423::[CX423]	CX423		ind1B	115.5	C	T	C	C	C	C	C	C	C	T	T	T	A	G	A	A	A	G	C	T	T	-			G	G	C	T	C
CX425	NA	T	NA	NA	C	NA	NA	G	NA	C	NA	NA	G	NA	A	CX425::[CX425]	CX425		ind1B	83	C	T	T	-	-	-	C	C	C	T	C	-	-	-	-	A	A	G	C	T	T	-	A	-	G	G	C	T	C
CX45	NA	T	NA	NA	C	NA	NA	G	NA	C	NA	NA	G	NA	A	DHAN4::[CX45]	CX45	IRGC 135877	ind1B	97	C	T	T	-	-	-	C	C	C	T	T	T	A	G	A	A	A	G	C	T	T	-	A	-	G	G	C	T	C
CX5	NA	T	NA	NA	C	NA	NA	G	NA	C	NA	NA	G	NA	A	108S::[CX5]	CX5		indx	50	C	T	T	-	-	-	C	C	C	T						A	A	G	C	T					G	G	C	T	C
CX52	NA	T	NA	NA	C	NA	NA	G	NA	C	NA	NA	G	NA	A	DIANDUN 502::[CX52]	CX52	IRGC 135878	indx	75	C	T	T	-	-	-	C	C	C	T	C	-	-	-	-	C	-	G	C	T	T	-			G	G	C	T	C
CX53	NA	T	NA	NA	C	NA	NA	G	NA	C	NA	NA	G	NA	A	JIANGXISIMIAO::[CX53]	CX53	IRGC 135954	indx	116	C	T	C	C	C	C	C	C	C	T	C	-	-	-	-	C	-	G	C	T	T	-	A	-	G	G	C	T	C
CX542	NA	T	NA	NA	C	NA	NA	G	NA	C	NA	NA	G	NA	A	RR2-6::[CX542]	CX542		indx	118.5	C	T	C	C	C	C	C	C	C	T	C	-	-	-	-	A	A	G	C	T	T	-	A	-	G	G	C	T	C
CX57	NA	T	NA	NA	C	NA	NA	G	NA	C	NA	NA	G	NA	A	ZHONGCHAO 123::[CX57]	CX57		temp	88	C	T	C	C	C	C	C	C	C	T	C	-	-	-	-	C	-	G	C	T	T	-	A	-
CX59	NA	T	NA	NA	C	NA	NA	G	NA	C	NA	NA	G	NA	A	MILAGROSA, ZAWA BANDAY::[CX59]	CX59	IRGC 135983	aro	105	C	T	T	-	-	-	C	C	C	T	C	-	-	-	-	A	A	G	C	T	C	C	A	-	G	G	C	T	C
CX63	NA	T	NA	NA	C	NA	NA	G	NA	C	NA	NA	G	NA	A	JHONA 349::[CX63]	CX63	IRGC 117769	aus	98	C	T	T	-	-	-	C	C	C	T	C	-	-	-	-	C	-	G	C	T	T	-			G	G	C	T	C
CX64	NA	T	NA	NA	C	NA	NA	G	NA	C	NA	NA	G	NA	A	IRAT 352::[CX64]	CX64	IRGC 135943	ind3	85.5	C	T	T	-	-	-	C	C	C	T	C	-	-	-	-	C	-	G	C	T	C	C	A	-	G	G	C	T	C
CX65	NA	T	NA	NA	C	NA	NA	G	NA	C	NA	NA	G	NA	A	DOMSIAH::[CX65]	CX65	IRGC 117467	aro	99.5	C	T	C	C	C	C	C	C	C	T	T	T	A	G	A	A	A	G	C	T	T	-	A	-	G	G	C	T	C
CX66	NA	T	NA	NA	C	NA	NA	G	NA	C	NA	NA	G	NA	A	TAROM MOLAII::[CX66]	CX66	IRGC 136052	aro	89	C	T	T	-	-	-	C	C	C	T	T	T	A	G	A	C	-	G	C	T	T	-	A	-	G	G	C	T	C
CX67	NA	T	NA	NA	C	NA	NA	G	NA	C	NA	NA	G	NA	A	BINAM::[CX67]	CX67	IRGC 135845	aro	70	C	T	T	-	-	-	C	C	C	T	C	-	-	-	-			G	C	T	T	-	A	-	G	G	C	T
CX70	NA	T	NA	NA	C	NA	NA	G	NA	C	NA	NA	G	NA	A	MR77(SEBERANG )::[CX70]	CX70	IRGC 135994	indx	59	C	T	T	-	-	-	C	C	C	T	C	-	-	-	-	C	-	G	C	T	T	-	A	-	G	G	C	T	C
CX72	NA	T	NA	NA	C	NA	NA	G	NA	C	NA	NA	G	NA	A	BASMATI 385::[CX72]	CX72	IRGC 135838	aro	82.5											C	-	-	-	-	C	-								G	G	C	T
CX73	NA	T	NA	NA	C	NA	NA	G	NA	C	NA	NA	G	NA	A	IR6::[CX73]	CX73	IRGC 135927	ind1B	88											C	-	-	-	-	C	-	G	C	T	T	-	A	-	G	G	C	T	C
CX80	NA	T	NA	NA	C	NA	NA	G	NA	C	NA	NA	G	NA	A	OM1706::[CX80]	CX80	IRGC 136014	ind1B	96	C	T	T	-	-	-	C	C	C	T	T	T	A	G	A	C	-	G	C	T	T	-	A	-	G	G	C	T	C
CX82	NA	T	NA	NA	C	NA	NA	G	NA	C	NA	NA	G	NA	A	X21::[CX82]	CX82	IRGC 136073	ind1B	128	C	T	T	-	-	-	C	C	C	T	T	T	A	G	A	A	A	G	C	T	T	-	A	-	G	G	C	T	C
CX83	NA	T	NA	NA	C	NA	NA	G	NA	C	NA	NA	G	NA	A	X22::[CX83]	CX83	IRGC 136074	ind1B	110	C	T	T	-	-	-	C	C	C	T	C	-	-	-	-	A	A	G	C	T	T	-	A	-	G	G	C	T	C
CX9	NA	T	NA	NA	C	NA	NA	G	NA	C	NA	NA	G	NA	A	FENGAIZHAN::[CX9]	CX9		ind1B	42																							A	-	G	G	C	T
CX99	NA	T	NA	NA	C	NA	NA	G	NA	C	NA	NA	G	NA	A	DODDI::[CX99]	CX99	IRGC 135883	ind2	136	C	T	C	C	C	C	C	C	C	T	C	-	-	-	-	A	A	G	C	T	C	C	A	-	G	G	C	T	C
IRIS_313-10000	NA	T	NA	NA	C	NA	NA	G	NA	C	NA	NA	G	NA	A	SUWEON 311::IRGC 61890-1::[IRIS 313-10000]	IRIS 313-10000	IRGC 125907	ind1B	88.5	C	T	T	-/C	-/C	-/C	C	C	C	T	C	-/T	-/A	-/G	-/A	A	A/T	G	C	T			A	-/T	G	G	C	T	T/C
IRIS_313-10032	NA	T	NA	NA	C	NA	NA	G	NA	C	NA	NA	G	NA	A	NS 1576::IRGC 68951-1::[IRIS 313-10032]	IRIS 313-10032	IRGC 125858	aro	96	C	T	T	-	-	-	C	C	C	T	T	T	A	G	A	C	-	G	C	T	T	-	A	-	G	G	C	T	C
IRIS_313-10109	NA	T	NA	NA	C	NA	NA	G	NA	C	NA	NA	G	NA	A	EX EBOKOZURU::IRGC 79912-1::[IRIS 313-10109]	IRIS 313-10109	IRGC 125735	ind3	109	C	T	C	C	C	C	C	C	C	T	T	T	A	G	A	A	A	G	C	T	T	-	A	-	G	G	C	T	C
IRIS_313-10158	NA	T	NA	NA	C	NA	NA	G	NA	C	NA	NA	G	NA	A	PICO NEGRO::IRGC 55849-1::[IRIS 313-10158]	IRIS 313-10158	IRGC 126080	indx	99.5	C	T	C	C	C	C	C	C	C	T	C	-	-	-	-	C	-	G	C	T	T	-	A	-	G	G	C	T	C
IRIS_313-10161	NA	T	NA	NA	C	NA	NA	G	NA	C	NA	NA	G	NA	A	BR IRGA 409::IRGC 55915-1::[IRIS 313-10161]	IRIS 313-10161	IRGC 125691	ind1B	81.5											C	-	-	-	-	C	-	G	C	T	T	-	A	-	G	G	C	T	C
IRIS_313-10168	NA	T	NA	NA	C	NA	NA	G	NA	C	NA	NA	G	NA	A	MEI FENG 9::IRGC 63735-1::[IRIS 313-10168]	IRIS 313-10168	IRGC 125836	indx	103	C	T	C	C	C	C	C	C	C	T	T	T	A	G	A	C	-	G	C	T	T	-	A	-	G	G	C	T	C
IRIS_313-10234	NA	T	NA	NA	C	NA	NA	G	NA	C	NA	NA	G	NA	A	PSBRC 50::IRGC 99706-1::[IRIS 313-10234]	IRIS 313-10234	IRGC 125873	ind1B	101	C	T	T	-	-	-	C	C	C	T	C	-	-	-	-	C	-	G	C	T	C	C	C	C	G	G	C	T	C
IRIS_313-10235	NA	T	NA	NA	C	NA	NA	G	NA	C	NA	NA	G	NA	A	PSBRC 68::IRGC 99711-1::[IRIS 313-10235]	IRIS 313-10235	IRGC 125874	indx	132	C	T	T	-	-	-	C	C	C	T	T	T	A	G	A	C	-	G	C	T	T	-	A	-	G	G	C	T	C
IRIS_313-10257	NA	T	NA	NA	C	NA	NA	G	NA	C	NA	NA	G	NA	A	ALTAMIRA 9::IRGC 116953-1::[IRIS 313-10257]	IRIS 313-10257	IRGC 127031	indx	90.5	C	T	T	-	-	-	C	C	C	T	C	-	-	-	-	A	A	G	C	T	T	-	C	C	G	G	C	T	C
IRIS_313-10268	NA	T	NA	NA	C	NA	NA	G	NA	C	NA	NA	G	NA	A	FONAIAP 2::IRGC 116985-1::[IRIS 313-10268]	IRIS 313-10268	IRGC 127072	indx	68.5	C	T					C	C	C	T	C	-	-	-	-	C	-	G	C	T	T	-	C	C	G	G	C	T	C
IRIS_313-10271	NA	T	NA	NA	C	NA	NA	G	NA	C	NA	NA	G	NA	A	IA CUBA 17::IRGC 116990-1::[IRIS 313-10271]	IRIS 313-10271	IRGC 125966	indx	91.5	C	T	C	C	C	C	C	C	C	T	T	T	A	G	A	A	A	G	C	T	T	-	A	-	G	G	C	T	C
IRIS_313-10332	NA	T	NA	NA	C	NA	NA	G	NA	C	NA	NA	G	NA	A	B 4414 F-MR-6-3::IRGC 117310-1::[IRIS 313-10332]	IRIS 313-10332	IRGC 126044	indx	84.5	C	T	C	C	C	C	C	C	C	T	C	-	-	-	-	C	-	G	C	T	T	-	A	-	G	G	C	T	C
IRIS_313-10337	NA	T	NA	NA	C	NA	NA	G	NA	C	NA	NA	G	NA	A	B 6149 F-MR-7::IRGC 117314-1::[IRIS 313-10337]	IRIS 313-10337	IRGC 125953	indx	119	C	T	T	-	-	-	C	C	C	T	C	-	-	-	-	A	A	G	C	T	T	-	C	C	G	G	C	T	C
IRIS_313-10353	NA	T	NA	NA	C	NA	NA	G	NA	C	NA	NA	G	NA	A	HP 3319-2WX-6-4-1-B::IRGC 117331-1::[IRIS 313-10353]	IRIS 313-10353	IRGC 127049	indx	74	C	T	T	-	-	-	C	C	C	T	C	-	-	-	-	C	-						A	-	G	G	C	T
IRIS_313-10380	NA	T	NA	NA	C	NA	NA	G	NA	C	NA	NA	G	NA	A	IR 73690-7-2-1-1-3-2-2-1::IRGC 117384-1::[IRIS 313-10380]	IRIS 313-10380	IRGC 125981	aus	79	C	T	T	-	-	-	C	C	C	T	C	-	-	-	-	C	-	G	C	T	T	-	A	-					C
IRIS_313-10394	NA	T	NA	NA	C	NA	NA	G	NA	C	NA	NA	G	NA	A	IR 80310-12-B-1-3-B::IRGC 117307-1::[IRIS 313-10394]	IRIS 313-10394	IRGC 125986	indx	102	C	T	C	C	C	C	C	C	C	T	T	T	A	G	A	C	-	G	C	T	T	-	A	-	G	G	C	T	C
IRIS_313-10397	NA	T	NA	NA	C	NA	NA	G	NA	C	NA	NA	G	NA	A	IRGA 318-11-6-9-2B::IRGC 117339-1::[IRIS 313-10397]	IRIS 313-10397	IRGC 120991	ind1B	85.5	C	T	T	-	-	-	C	C	C	T	C	-	-	-	-	C	-	G	C	T	T	-	C	C	G	G	C	T	C
IRIS_313-10398	NA	T	NA	NA	C	NA	NA	G	NA	C	NA	NA	G	NA	A	IRGA 318-11-9-2A::IRGC 117340-1::[IRIS 313-10398]	IRIS 313-10398	IRGC 126030	ind1B	85	C	T	T	-	-	-	C	C	C	T	C	-	-	-	-	C	-	G	C	T	T	-	A	-	G	G	C	T	C
IRIS_313-10402	NA	T	NA	NA	C	NA	NA	G	NA	C	NA	NA	G	NA	A	IRGA 411-1-6-1F-A::IRGC 117344-1::[IRIS 313-10402]	IRIS 313-10402	IRGC 125990	ind1B	67.5	C	T	C	C	C	C	C	C	C	T	C	-	-	-	-	A	A	G	C	T	T	-	A	-	G	G	C	T	C
IRIS_313-10403	NA	T	NA	NA	C	NA	NA	G	NA	C	NA	NA	G	NA	A	IRGA 659-1-2-2-2::IRGC 117345-1::[IRIS 313-10403]	IRIS 313-10403	IRGC 120993	indx	82	C	T	T	-	-	-	C	C	C	T	C	-	-	-	-	C	-	G	C	T	C	C	C	C	G	G	C	T	C
IRIS_313-10404	NA	T	NA	NA	C	NA	NA	G	NA	C	NA	NA	G	NA	A	K 479-2-3::IRGC 117346-1::[IRIS 313-10404]	IRIS 313-10404	IRGC 121003	indx	89	C	T	C	C	C	C	C	C	C	T	C	-	-	-	-	A	A	G	C	T	T	-	C	C	G	G	C	T	C
IRIS_313-10417	NA	T	NA	NA	C	NA	NA	G	NA	C	NA	NA	G	NA	A	UPR 1201-1-20-1::IRGC 117357-1::[IRIS 313-10417]	IRIS 313-10417	IRGC 126012	ind1B	54	C	T	T	-	-	-	C	C	C	T	C	-	-	-	-	C	-	G	C	T	T	-	A	-
IRIS_313-10421	NA	T	NA	NA	C	NA	NA	G	NA	C	NA	NA	G	NA	A	WAR 72-2-1-1::IRGC 117361-1::[IRIS 313-10421]	IRIS 313-10421	IRGC 121154	indx	79	C	T	T	-	-	-	C	C	C	T	C	-	-	-	-	C	-	G	C	T			A	-	G	G	C	T	C
IRIS_313-10423	NA	T	NA	NA	C	NA	NA	G	NA	C	NA	NA	G	NA	A	YN 1353-3::IRGC 117363-1::[IRIS 313-10423]	IRIS 313-10423	IRGC 121160	indx	92	C	T	T	-	-	-	C	C	C	T	C	-	-	-	-	C	-	G	C	T	T	-			G	G	C	T	C
IRIS_313-10506	NA	T	NA	NA	C	NA	NA	G	NA	C	NA	NA	G	NA	A	PARN A 191::IRGC 4932-1::[IRIS 313-10506]	IRIS 313-10506		ind3	47	C	T	T	-	-	-	C	C	C	T	C	-	-	-	-	C	-	G	C	T	T	-			G	G	C	T	C
IRIS_313-10514	NA	T	NA	NA	C	NA	NA	G	NA	C	NA	NA	G	NA	A	CAMPENA::IRGC 5452-2::[IRIS 313-10514]	IRIS 313-10514	IRGC 135629	indx	55											C	-	-	-	-	C	-	G	C	T	T	-	A	-
IRIS_313-10521	NA	T	NA	NA	C	NA	NA	G	NA	C	NA	NA	G	NA	A	SANNABATHA::IRGC 5971-1::[IRIS 313-10521]	IRIS 313-10521		aro	78	C	T	T	-	-	-	C	C	C	T	C	-	-	-	-	C	-	G	C	T	T	-	A	-	G	G	C	T	C
IRIS_313-10555	NA	T	NA	NA	C	NA	NA	G	NA	C	NA	NA	G	NA	A	LUA HUONG T 1::IRGC 7082-2::[IRIS 313-10555]	IRIS 313-10555	IRGC 128098	ind3	67	C	T	T	-	-	-	C	C	C	T	C	-	-	-	-	C	-	G	C	T	T	-	A	-	G	G	C	T	C
IRIS_313-10573	NA	T	NA	NA	C	NA	NA	G	NA	C	NA	NA	G	NA	A	SOSSOKA OULE::IRGC 7850-2::[IRIS 313-10573]	IRIS 313-10573	IRGC 128168	ind2	66	C	T	T	-	-	-	C	C	C	T	C	-	-	-	-	C	-	G	C	T	T	-	A	-	G	G	C	T	C
IRIS_313-10592	NA	T	NA	NA	C	NA	NA	G	NA	C	NA	NA	G	NA	A	DJ 69::IRGC 8482-1::[IRIS 313-10592]	IRIS 313-10592	IRGC 127324	aus	76.5	C	T	T	-	-	-	C	C	C	T	C	-	-	-	-			G	C	T	T	-	A	-	G	G	C	T	C
IRIS_313-10595	NA	T	NA	NA	C	NA	NA	G	NA	C	NA	NA	G	NA	A	DL 5::IRGC 8593-1::[IRIS 313-10595]	IRIS 313-10595	IRGC 127327	aus	62																C	-	G	C	T	T	-			G	G	C	T	C
IRIS_313-10600	NA	T	NA	NA	C	NA	NA	G	NA	C	NA	NA	G	NA	A	UCP 41::IRGC 8742-1::[IRIS 313-10600]	IRIS 313-10600	IRGC 128493	aus	49											C	-	-	-	-			G	C	T	T	-	A	-	G	G	C	T
IRIS_313-10604	NA	T	NA	NA	C	NA	NA	G	NA	C	NA	NA	G	NA	A	DV 2::IRGC 8806-1::[IRIS 313-10604]	IRIS 313-10604	IRGC 127347	aus	54	C	T	T	-	-	-	C	C	C	T	C	-	-	-	-	C	-	G	C	T	T	-	C	C	G	G	C	T	C
IRIS_313-10606	NA	T	NA	NA	C	NA	NA	G	NA	C	NA	NA	G	NA	A	DV 110::IRGC 8855-1::[IRIS 313-10606]	IRIS 313-10606	IRGC 127346	aus	47.5	C	T	T	-	-	-	C	C	C	T	C	-	-	-	-			G	C	T	T	-			G	G	C	T
IRIS_313-10654	NA	T	NA	NA	C	NA	NA	G	NA	C	NA	NA	G	NA	A	KA SAEN::IRGC 11642-1::[IRIS 313-10654]	IRIS 313-10654	IRGC 128335	ind3	74.5	C	T	C	C	C	C	C	C	C	T	C	-	-	-	-	C	-	G	C	T	T	-			G	G	C	T	T/C
IRIS_313-10688	NA	T	NA	NA	C	NA	NA	G	NA	C	NA	NA	G	NA	A	PADI TIMBUN::IRGC 13451-1::[IRIS 313-10688]	IRIS 313-10688	IRGC 135782	ind3	77.5	C	T	T	-	-	-	C	C	C	T	C	-	-	-	-	C	-	G	C	T	T	-	A	-	G	G	C	T	C
IRIS_313-10717	NA	T	NA	NA	C	NA	NA	G	NA	C	NA	NA	G	NA	A	PERIYA VELLAI::IRGC 15475-1::[IRIS 313-10717]	IRIS 313-10717	IRGC 127725	ind2	114	C	T	T	-	-	-	C	C	C	T	C	-	-	-	-	C	-	G	C	T	T	-	A	-	G	G	C	T	C
IRIS_313-10720	NA	T	NA	NA	C	NA	NA	G	NA	C	NA	NA	G	NA	A	HEENDIKWEE::IRGC 15587-2::[IRIS 313-10720]	IRIS 313-10720	IRGC 132337	indx	37	C	T	T	-	-	-	C	C	C	T													A	-	G	G	C	T
IRIS_313-10737	NA	T	NA	NA	C	NA	NA	G	NA	C	NA	NA	G	NA	A	GHAIYA::IRGC 16286-1::[IRIS 313-10737]	IRIS 313-10737	IRGC 128297	aus	76.5	C	T	T	-	-	-	C	C	C	T	C	-	-	-	-	C	-	G	C	T	T	-	C	C	G	G	C	T	C
IRIS_313-10772	NA	T	NA	NA	C	NA	NA	G	NA	C	NA	NA	G	NA	A	GOJOT::IRGC 17669-1::[IRIS 313-10772]	IRIS 313-10772	IRGC 127388	ind3	80	C	T	T	-	-	-	C	C	C	T	T	T	A	G	A	C	-				T	-	C	C	G	G	C	T	C
IRIS_313-10774	NA	T	NA	NA	C	NA	NA	G	NA	C	NA	NA	G	NA	A	HEGAR MANAH::IRGC 17733-1::[IRIS 313-10774]	IRIS 313-10774	IRGC 127404	indx	73	C	T	T	-	-	-	C	C	C	T	C	-	-	-	-	A	A	G	C	T	T	-	A	-	G	G	C	T
IRIS_313-10775	NA	T	NA	NA	C	NA	NA	G	NA	C	NA	NA	G	NA	A	INDEL::IRGC 17748-2::[IRIS 313-10775]	IRIS 313-10775	IRGC 128056	indx	89	C	T	T	-	-	-	C	C	C	T	T	T	A	G	A	C	-	G	C	T			A	-	G	G	C	T	C
IRIS_313-10777	NA	T	NA	NA	C	NA	NA	G	NA	C	NA	NA	G	NA	A	KAMAS::IRGC 17785-1::[IRIS 313-10777]	IRIS 313-10777	IRGC 127483	ind3	71	C	T	C	C	C	C	C	C	C	T	T	T	A	G	A	C	-	G	C	T	T	-	A	-	G	G	C	T	C
IRIS_313-10779	NA	T	NA	NA	C	NA	NA	G	NA	C	NA	NA	G	NA	A	KERAN DUKUH::IRGC 17822-2::[IRIS 313-10779]	IRIS 313-10779	IRGC 128521	ind3	121	C	T	C	C	C	C	C	C	C	T	T	T	A	G	A	C	-	G	C	T	T	-	C	C	G	G	C	T	C
IRIS_313-10810	NA	T	NA	NA	C	NA	NA	G	NA	C	NA	NA	G	NA	A	SEGON BENGGALA::IRGC 18724-1::[IRIS 313-10810]	IRIS 313-10810	IRGC 135793	ind3	94	C	T	C	C	C	C	C	C	C	T	C	-	-	-	-	A	A	G	C	T	T	-	A	-	G	G	C	T	C
IRIS_313-10811	NA	T	NA	NA	C	NA	NA	G	NA	C	NA	NA	G	NA	A	SEMPOR::IRGC 18761-2::[IRIS 313-10811]	IRIS 313-10811	IRGC 128160	indx	78	C	T	T	-	-	-	C	C	C	T	C	-	-	-	-	C	-	G	C	T	T	-			G	G	C	T	C
IRIS_313-10812	NA	T	NA	NA	C	NA	NA	G	NA	C	NA	NA	G	NA	A	SERUNEN::IRGC 18789-1::[IRIS 313-10812]	IRIS 313-10812	IRGC 135794	ind3	112	C	T	T	-	-	-	C	C	C	T	C	-	-	-	-	A	A	G	C	T	T	-	A	-	G	G	C	T	C
IRIS_313-10814	NA	T	NA	NA	C	NA	NA	G	NA	C	NA	NA	G	NA	A	SIBORAS::IRGC 18816-2::[IRIS 313-10814]	IRIS 313-10814	IRGC 128163	ind3	126	C	T	T	-	-	-	C	C	C	T	C	-	-	-	-	A	A	G	C	T	C	C	A	-	G	G	C	T	C
IRIS_313-10824	NA	T	NA	NA	C	NA	NA	G	NA	C	NA	NA	G	NA	A	HOING CANTEL::IRGC 19282-2::[IRIS 313-10824]	IRIS 313-10824	IRGC 128053	ind3	122	C	T	C	C	C	C	C	C	C	T	T	T	A	G	A	A	A	G	C	T	C	C			G	G	C	T	C
IRIS_313-10842	NA	T	NA	NA	C	NA	NA	G	NA	C	NA	NA	G	NA	A	LUBUK LINGGAU::IRGC 20000-2::[IRIS 313-10842]	IRIS 313-10842	IRGC 128099	ind3	73	C	T					C	C	C	T	C	-	-	-	-	C	-	G	C	T	T	-	A	-	G	G	C	T	C
IRIS_313-10845	NA	T	NA	NA	C	NA	NA	G	NA	C	NA	NA	G	NA	A	ARC 5756::IRGC 20220-2::[IRIS 313-10845]	IRIS 313-10845	IRGC 132418	aus	101.5	C	T	C	C	C	C	C	C	C	T	C	-	-	-	-	C	-	G	C	T	C	C	A	-	G	G	C	T	C
IRIS_313-10871	NA	T	NA	NA	C	NA	NA	G	NA	C	NA	NA	G	NA	A	ARC 11777::IRGC 21639-1::[IRIS 313-10871]	IRIS 313-10871	IRGC 127139	aus	132	C	T	C	C	C	C	C	C	C	T	T	T	A	G	A	C	-	G	C	T	T	-	A	-	G	G	C	T	C
IRIS_313-10877	NA	T	NA	NA	C	NA	NA	G	NA	C	NA	NA	G	NA	A	ARC 12079::IRGC 21888-1::[IRIS 313-10877]	IRIS 313-10877	IRGC 127143	aus	49											C	-	-	-	-	C	-	G	C	T			A	-	G	G	C	T	C
IRIS_313-10878	NA	T	NA	NA	C	NA	NA	G	NA	C	NA	NA	G	NA	A	ARC 12101::IRGC 21907-1::[IRIS 313-10878]	IRIS 313-10878	IRGC 127144	aus	82	C	T	T	-	-	-	C	C	C	T	C	-	-	-	-	A	A	G	C	T	T	-			G	G	C	T	C
IRIS_313-10882	NA	T	NA	NA	C	NA	NA	G	NA	C	NA	NA	G	NA	A	ARC 12433::IRGC 22064-1::[IRIS 313-10882]	IRIS 313-10882	IRGC 127146	aus	67	C	T	T	-	-	-	C	C	C	T	C	-	-	-	-	C	-	G	C	T	T	-	A	-	G	G	C	T
IRIS_313-10899	NA	T	NA	NA	C	NA	NA	G	NA	C	NA	NA	G	NA	A	DAMNOEUB KHSE SAUT::IRGC 22819-2::[IRIS 313-10899]	IRIS 313-10899	IRGC 128025	ind3	56	C	T	T	-	-	-	C	C	C	T	C	-	-	-	-	C	-	G	C	T	T	-	A	-	G	G	C	T	C
IRIS_313-10906	NA	T	NA	NA	C	NA	NA	G	NA	C	NA	NA	G	NA	A	LUA NEP 4416::IRGC 23006-1::[IRIS 313-10906]	IRIS 313-10906		ind3	79.5	C	T	T	-	-	-	C	C	C	T	C	-	-	-	-			G	C	T	T	-	A	-	G	G	C	T	C
IRIS_313-10910	NA	T	NA	NA	C	NA	NA	G	NA	C	NA	NA	G	NA	A	NEANG MAC::IRGC 23071-1::[IRIS 313-10910]	IRIS 313-10910	IRGC 135777	ind3	66	C	T	T	-	-	-	C	C	C	T	C	-	-	-	-	C	-	G	C	T	T	-			G	G	C	T	C
IRIS_313-10933	NA	T	NA	NA	C	NA	NA	G	NA	C	NA	NA	G	NA	A	ARC 7281::IRGC 24252-2::[IRIS 313-10933]	IRIS 313-10933	IRGC 132245	aro	73											C	-	-	-	-	C	-	G	C	T	T	-			G	G	C	T
IRIS_313-10934	NA	T	NA	NA	C	NA	NA	G	NA	C	NA	NA	G	NA	A	PAH PIANG::IRGC 24452-2::[IRIS 313-10934]	IRIS 313-10934	IRGC 128125	ind3	91	C	T	T	-	-	-	C	C	C	T	T	T	A	G	A	C	-	G	C	T					G	G	C	T	C
IRIS_313-10935	NA	T	NA	NA	C	NA	NA	G	NA	C	NA	NA	G	NA	A	BRONDOL PUTIH::IRGC 24541-1::[IRIS 313-10935]	IRIS 313-10935	IRGC 127238	ind3	68.5																C	-	G	C	T	T	-			G	G	C	T	C
IRIS_313-10938	NA	T	NA	NA	C	NA	NA	G	NA	C	NA	NA	G	NA	A	SIGUPAI::IRGC 24642-2::[IRIS 313-10938]	IRIS 313-10938		ind3	115	C	T	T	-	-	-	C	C	C	T	C	-	-	-	-	C	-	G	C	T			C	C	G	G	C	T	C
IRIS_313-10941	NA	T	NA	NA	C	NA	NA	G	NA	C	NA	NA	G	NA	A	SINTHA::IRGC 24687-1::[IRIS 313-10941]	IRIS 313-10941	IRGC 127809	indx	121.5	C	T	C	C	C	C	C	C	C	T	C	-	-	-	-	C	-	G	C	T	T	-	A	-	G	G	C	T	C
IRIS_313-10943	NA	T	NA	NA	C	NA	NA	G	NA	C	NA	NA	G	NA	A	PADI BENOT::IRGC 24757-2::[IRIS 313-10943]	IRIS 313-10943	IRGC 135631	ind3	110	C	T	C	C	C	C	C	C	C	T	C	-	-	-	-	C	-	G	C	T	T	-	A	-	G	G	C	T	C
IRIS_313-10947	NA	T	NA	NA	C	NA	NA	G	NA	C	NA	NA	G	NA	A	NANE::IRGC 25035-1::[IRIS 313-10947]	IRIS 313-10947	IRGC 127643	ind3	69	C	T	T	-	-	-	C	C	C	T								G	C	T	T	-	A	-	G	G	C	T	C
IRIS_313-10954	NA	T	NA	NA	C	NA	NA	G	NA	C	NA	NA	G	NA	A	PADI GRUNDUL 1::IRGC 25493-1::[IRIS 313-10954]	IRIS 313-10954	IRGC 127700	ind3	100.5	C	T	T	-	-	-	C	C	C	T	C	-	-	-	-	C	-	G	C	T	C	C	A	-	G	G	C	T	C
IRIS_313-10962	NA	T	NA	NA	C	NA	NA	G	NA	C	NA	NA	G	NA	A	TERUNG DAUN::IRGC 25823-2::[IRIS 313-10962]	IRIS 313-10962	IRGC 128182	ind3	108	C	T	T	-	-	-	C	C	C	T	T	T	A	G	A	C	-	G	C	T	T	-	A	-	G	G	C	T	C
IRIS_313-10963	NA	T	NA	NA	C	NA	NA	G	NA	C	NA	NA	G	NA	A	KATAKCHIKON::IRGC 25880-1::[IRIS 313-10963]	IRIS 313-10963	IRGC 127497	aus	119.5	C	T	T	-	-	-	C	C	C	T	C	-	-	-	-	A	A	G	C	T	T	-	A	-	G	G	C	T	C
IRIS_313-10984	NA	T	NA	NA	C	NA	NA	G	NA	C	NA	NA	G	NA	A	DUDHSAR::IRGC 26609-2::[IRIS 313-10984]	IRIS 313-10984	IRGC 128034	ind2	83	C	T	T	-	-	-	C	C	C	T	C	-	-	-	-	C	-	G	C	T	T	-			G	G	C	T	C
IRIS_313-11000	NA	T	NA	NA	C	NA	NA	G	NA	C	NA	NA	G	NA	A	MAIRUL::IRGC 27170-1::[IRIS 313-11000]	IRIS 313-11000	IRGC 127591	ind3	68.5	C	T	C	C	C	C	C	C	C	T	T	T	A	G	A	C	-	G	C	T	T	-	A	-	G	G	C	T	C
IRIS_313-11013	NA	T	NA	NA	C	NA	NA	G	NA	C	NA	NA	G	NA	A	BOTESWAR 2::IRGC 27536-1::[IRIS 313-11013]	IRIS 313-11013	IRGC 127236	aus	70	C	T	T	-	-	-	C	C	C	T	T	T	A	G	A	C	-	G	C	T	T	-	A	-	G	G	C	T	C
IRIS_313-11023	NA	T	NA	NA	C	NA	NA	G	NA	C	NA	NA	G	NA	A	BASMATI SURKH 161::IRGC 27797-1::[IRIS 313-11023]	IRIS 313-11023	IRGC 127214	aro	55	C	T	T	-	-	-	C	C	C	T	C	-	-	-	-	C	-				T	-	A	-	G	G	C	T
IRIS_313-11028	NA	T	NA	NA	C	NA	NA	G	NA	C	NA	NA	G	NA	A	MOTIA::IRGC 28036-1::[IRIS 313-11028]	IRIS 313-11028	IRGC 128393	aus	74.5	C	T	T	-	-	-	C	C	C	T	C	-	-	-	-	C	-	G	C	T	T	-			G	G	C	T	C
IRIS_313-11032	NA	T	NA	NA	C	NA	NA	G	NA	C	NA	NA	G	NA	A	PALAM PURI BAS 137::IRGC 28084-1::[IRIS 313-11032]	IRIS 313-11032	IRGC 127710	aro	85	C	T	T	-	-	-	C	C	C	T	C	-	-	-	-	C	-	G	C	T	T	-	A	-	G	G	C	T	C
IRIS_313-11033	NA	T	NA	NA	C	NA	NA	G	NA	C	NA	NA	G	NA	A	RATRIO::IRGC 28181-1::[IRIS 313-11033]	IRIS 313-11033	IRGC 128448	admix	116	C	T	C	C	C	C	C	C	C	T	T	T	A	G	A	C	-	G	C	T	T	-	C	C	G	G	C	T	C
IRIS_313-11036	NA	T	NA	NA	C	NA	NA	G	NA	C	NA	NA	G	NA	A	34::IRGC 28371-2::[IRIS 313-11036]	IRIS 313-11036	IRGC 127919	aus	78							C	C	C	T	C	-	-	-	-	C	-	G	C	T	T	-			G	G	C	T	C
IRIS_313-11043	NA	T	NA	NA	C	NA	NA	G	NA	C	NA	NA	G	NA	A	BENGKA KERSEK::IRGC 28666-1::[IRIS 313-11043]	IRIS 313-11043		ind3	103	C	T	T	-	-	-	C	C	C	T	C	-	-	-	-			G	C	T	T	-	A	-	G	G	C	T	C
IRIS_313-11047	NA	T	NA	NA	C	NA	NA	G	NA	C	NA	NA	G	NA	A	AUS 84::IRGC 28947-2::[IRIS 313-11047]	IRIS 313-11047	IRGC 127977	aus	120	C	T	T	-	-	-	C	C	C	T	C	-	-	-	-	A	A	G	C	T	T	-	A	-	G	G	C	T	C
IRIS_313-11048	NA	T	NA	NA	C	NA	NA	G	NA	C	NA	NA	G	NA	A	AUS 171::IRGC 29004-1::[IRIS 313-11048]	IRIS 313-11048	IRGC 127178	aus	107	C	T	T	-	-	-	C	C	C	T	C	-	-	-	-	A	A	G	C	T	T	-	A	-	G	G	C	T	C
IRIS_313-11055	NA	T	NA	NA	C	NA	NA	G	NA	C	NA	NA	G	NA	A	AUS 299::IRGC 29087-1::[IRIS 313-11055]	IRIS 313-11055	IRGC 127185	aus	125	C	T	T	-	-	-	C	C	C	T	C	-	-	-	-	C	-	G	C	T	T	-	A	-	G	G	C	T	C
IRIS_313-11058	NA	T	NA	NA	C	NA	NA	G	NA	C	NA	NA	G	NA	A	AUS 329::IRGC 29116-1::[IRIS 313-11058]	IRIS 313-11058	IRGC 127188	aus	131.5	C	T	C	C	C	C	C	C	C	T	T	T	A	G	A	A	A	G	C	T	T	-	A	-	G	G	C	T	C
IRIS_313-11069	NA	T	NA	NA	C	NA	NA	G	NA	C	NA	NA	G	NA	A	TUPA 15-3::IRGC 29416-2::[IRIS 313-11069]	IRIS 313-11069	IRGC 128197	aro	69	C	T	T	-	-	-	C	C	C	T	C	-	-	-	-	C	-	G	C	T	T	-			G	G	C	T	C
IRIS_313-11070	NA	T	NA	NA	C	NA	NA	G	NA	C	NA	NA	G	NA	A	TUPA::IRGC 29432-1::[IRIS 313-11070]	IRIS 313-11070	IRGC 127239	admix	67	C	T	T	-	-	-	C	C	C	T	C	-	-	-	-	C	-	G	C	T	T	-			G	G	C	T	C
IRIS_313-11078	NA	T	NA	NA	C	NA	NA	G	NA	C	NA	NA	G	NA	A	NON HAI::IRGC 29636-2::[IRIS 313-11078]	IRIS 313-11078	IRGC 132359	indx	88	C	T	T	-	-	-	C	C	C	T	C	-	-	-	-	A	A	G	C	T	T	-	A	-	G	G	C	T	C
IRIS_313-11080	NA	T	NA	NA	C	NA	NA	G	NA	C	NA	NA	G	NA	A	PHAE MEUN LAN::IRGC 29660-1::[IRIS 313-11080]	IRIS 313-11080	IRGC 128430	ind3	74	C	T	T	-	-	-	C	C	C	T	C	-	-	-	-	C	-	G	C	T					G	G	C	T	C
IRIS_313-11088	NA	T	NA	NA	C	NA	NA	G	NA	C	NA	NA	G	NA	A	SRAU KHSAI::IRGC 29896-2::[IRIS 313-11088]	IRIS 313-11088	IRGC 128170	ind3	48	C	T	T	-	-	-	C	C	C	T	C	-	-	-	-	C	-				T	-			G	G	C	T	C
IRIS_313-11091	NA	T	NA	NA	C	NA	NA	G	NA	C	NA	NA	G	NA	A	KHAO NON::IRGC 30051-1::[IRIS 313-11091]	IRIS 313-11091	IRGC 127515	indx	39	C	T	T	-	-	-	C	C	C	T	C	-	-	-	-	C	-	G	C	T	T	-			G	G	C	T
IRIS_313-11122	NA	T	NA	NA	C	NA	NA	G	NA	C	NA	NA	G	NA	A	IR 1813-694-2::IRGC 32656-2::[IRIS 313-11122]	IRIS 313-11122	IRGC 128059	ind1B	74.5	C	T	T	-	-	-	C	C	C	T	C	-	-	-	-	C	-	G	C	T	T	-	A	-	G	G	C	T	C
IRIS_313-11133	NA	T	NA	NA	C	NA	NA	G	NA	C	NA	NA	G	NA	A	LWANKHAN::IRGC 33330-1::[IRIS 313-11133]	IRIS 313-11133	IRGC 127582	ind3	69											C	-	-	-	-	C	-	G	C	T	T	-			G	G	C	T	C
IRIS_313-11154	NA	T	NA	NA	C	NA	NA	G	NA	C	NA	NA	G	NA	A	DHARIAL::IRGC 34034-1::[IRIS 313-11154]	IRIS 313-11154	IRGC 127318	aus	44	C	T	T	-	-	-	C	C	C	T	C	-	-	-	-	C	-								G	G	C	T
IRIS_313-11165	NA	T	NA	NA	C	NA	NA	G	NA	C	NA	NA	G	NA	A	BENA JHUPI::IRGC 34850-2::[IRIS 313-11165]	IRIS 313-11165	IRGC 127993	aus	66.5	C	T	T	-	-	-	C	C	C	T	C	-	-	-	-	C	-	G	C	T					G	G	C	T	C
IRIS_313-11172	NA	T	NA	NA	C	NA	NA	G	NA	C	NA	NA	G	NA	A	RANI BHOG::IRGC 35109-1::[IRIS 313-11172]	IRIS 313-11172	IRGC 127762	aus	48.5	C	T	T	-	-	-	C	C	C	T	C	-	-	-	-	C	-	G	C	T	T	-	A	-	G	G	C	T
IRIS_313-11192	NA	T	NA	NA	C	NA	NA	G	NA	C	NA	NA	G	NA	A	BKN 7130-1017-2::IRGC 36531-2::[IRIS 313-11192]	IRIS 313-11192	IRGC 127997	ind3	90	C	T	T	-	-	-	C	C	C	T	C	-	-	-	-	C	-	G	C	T	T	-			G	G	C	T	C
IRIS_313-11213	NA	T	NA	NA	C	NA	NA	G	NA	C	NA	NA	G	NA	A	NARIKEL BADI::IRGC 37550-1::[IRIS 313-11213]	IRIS 313-11213	IRGC 127648	aus	49.5	C	T	T	-	-	-	C	C	C	T	C	-	-	-	-	C	-	G	C	T					G	G	C	T	C
IRIS_313-11224	NA	T	NA	NA	C	NA	NA	G	NA	C	NA	NA	G	NA	A	PATNAI 31-679::IRGC 38149-2::[IRIS 313-11224]	IRIS 313-11224	IRGC 128130	ind2	99	C	T	T	-	-	-	C	C	C	T	C	-	-	-	-	C	-	G	C	T	T	-	A	-	G	G	C	T	C
IRIS_313-11233	NA	T	NA	NA	C	NA	NA	G	NA	C	NA	NA	G	NA	A	SPR 7284-57-5::IRGC 38649-1::[IRIS 313-11233]	IRIS 313-11233	IRGC 127823	ind1B	59											C	-	-	-	-	C	-						A	-	G	G	C	T	C
IRIS_313-11239	NA	T	NA	NA	C	NA	NA	G	NA	C	NA	NA	G	NA	A	B 737 G-KN-23-1::IRGC 39203-2::[IRIS 313-11239]	IRIS 313-11239	IRGC 127978	indx	131.5	C	T	C	C	C	C	C	C	C	T	C	-	-	-	-	C	-	G	C	T	T	-			G	G	C	T	C
IRIS_313-11253	NA	T	NA	NA	C	NA	NA	G	NA	C	NA	NA	G	NA	A	SML CAMPONI::IRGC 40642-1::[IRIS 313-11253]	IRIS 313-11253		indx	125	C	T	T	-	-	-	C	C	C	T	T	T	A	G	A	C	-	G	C	T	T	-	A	-	G	G	C	T	C
IRIS_313-11258	NA	T	NA	NA	C	NA	NA	G	NA	C	NA	NA	G	NA	A	ARC 13502::IRGC 41126-2::[IRIS 313-11258]	IRIS 313-11258	IRGC 127948	aro	154	C	T	C	C	C	C	C	C	C	T	T	T	A	G	A	A	A				T	-	A	-	G	G	C	T	C
IRIS_313-11261	NA	T	NA	NA	C	NA	NA	G	NA	C	NA	NA	G	NA	A	ARC 13785::IRGC 41218-2::[IRIS 313-11261]	IRIS 313-11261	IRGC 127951	indx	52.5	C	T	T	-	-	-	C	C	C	T	C	-	-	-	-	C	-	G	C	T	T	-			G	G	C	T	C
IRIS_313-11263	NA	T	NA	NA	C	NA	NA	G	NA	C	NA	NA	G	NA	A	ARC 13919::IRGC 41313-2::[IRIS 313-11263]	IRIS 313-11263	IRGC 127953	indx	110.5	C	T					C	C	C	T	T	T	A	G	A	A	A	G	C	T	T	-	A	-	G	G	C	T	C
IRIS_313-11269	NA	T	NA	NA	C	NA	NA	G	NA	C	NA	NA	G	NA	A	ARC 14632::IRGC 41650-2::[IRIS 313-11269]	IRIS 313-11269	IRGC 127958	indx	142.5	C	T	C	C	C	C	C	C	C	T	T	T	A	G	A	A	A	G	C	T	C	C	A	-	G	G	C	T	C
IRIS_313-11278	NA	T	NA	NA	C	NA	NA	G	NA	C	NA	NA	G	NA	A	ARC 15319::IRGC 42007-1::[IRIS 313-11278]	IRIS 313-11278		indx	113	C	T	C	C	C	C	C	C	C	T	T	T	A	G	A	C	-	G	C	T			A	-	G	G	C	T	C
IRIS_313-11279	NA	T	NA	NA	C	NA	NA	G	NA	C	NA	NA	G	NA	A	ARC 15455::IRGC 42040-2::[IRIS 313-11279]	IRIS 313-11279	IRGC 127967	indx	120.5	C	T	T	-/C	-/C	-/C	C	C	C	T	T	C/T	A/C	C/G	A	A	A	G	C	T	T	-	A	-	G	G	C	T	C
IRIS_313-11289	NA	T	NA	NA	C	NA	NA	G	NA	C	NA	NA	G	NA	A	ARC 18578::IRGC 42459-2::[IRIS 313-11289]	IRIS 313-11289	IRGC 127971	aro	128	C	T	C	C	C	C	C	C	C	T	C	-	-	-	-	A	A	G	C	T	C	C	A	-	G	G	C	T	C
IRIS_313-11301	NA	T	NA	NA	C	NA	NA	G	NA	C	NA	NA	G	NA	A	ARC 14868::IRGC 43009-2::[IRIS 313-11301]	IRIS 313-11301	IRGC 127963	ind2	94	C	T	T	-	-	-	C	C	C	T	T	T	A	G	A	A	A	G	C	T	T	-	C	C	G	G	C	T	C
IRIS_313-11302	NA	T	NA	NA	C	NA	NA	G	NA	C	NA	NA	G	NA	A	ARC 14899::IRGC 43016-1::[IRIS 313-11302]	IRIS 313-11302	IRGC 127154	indx	119	C	T	T	-	-	-	C	C	C	T	C	-	-	-	-	C	-	G	C	T	C	C			G	G	C	T	C
IRIS_313-11303	NA	T	NA	NA	C	NA	NA	G	NA	C	NA	NA	G	NA	A	ARC 15097::IRGC 43053-1::[IRIS 313-11303]	IRIS 313-11303	IRGC 128228	indx	97	C	T	T	-	-	-	C	C	C	T	C	-	-	-	-			G	C	T	C	C	A	-	G	G	C	T	C
IRIS_313-11307	NA	T	NA	NA	C	NA	NA	G	NA	C	NA	NA	G	NA	A	ARC 15387::IRGC 43175-2::[IRIS 313-11307]	IRIS 313-11307	IRGC 127965	indx	66	C	T	T	-	-	-	C	C	C	T	C	-	-	-	-	A	A	G	C	T	T	-	A	-	G	G	C	T	C
IRIS_313-11315	NA	T	NA	NA	C	NA	NA	G	NA	C	NA	NA	G	NA	A	PENDEK LAYUNG::IRGC 43542-2::[IRIS 313-11315]	IRIS 313-11315	IRGC 128131	ind3	54.5	C	T	T	-	-	-	C	C	C	T	C	-	-	-	-	A	A	G	C	T	T	-	A	-	G	G	C	T	T/C
IRIS_313-11317	NA	T	NA	NA	C	NA	NA	G	NA	C	NA	NA	G	NA	A	SI RANTING::IRGC 43645-2::[IRIS 313-11317]	IRIS 313-11317	IRGC 128167	ind3	92	C	T	T	-	-	-	C	C	C	T	T	T	A	G	A	A	A	G	C	T	T	-	C	C	G	G	C	T	C
IRIS_313-11321	NA	T	NA	NA	C	NA	NA	G	NA	C	NA	NA	G	NA	A	GANDHISAIL::IRGC 43826-2::[IRIS 313-11321]	IRIS 313-11321	IRGC 128043	ind2	89	C	T	T	-	-	-	C	C	C	T	C	-	-	-	-	A	A	G	C	T	T	-	C	C	G	G	C	T	C
IRIS_313-11322	NA	T	NA	NA	C	NA	NA	G	NA	C	NA	NA	G	NA	A	JASURE AUS::IRGC 43860-1::[IRIS 313-11322]	IRIS 313-11322	IRGC 127449	aus	72	C	T	T	-	-	-	C	C	C	T	C	-	-	-	-	A	A	G	C	T	T	-	A	-	G	G	C	T
IRIS_313-11327	NA	T	NA	NA	C	NA	NA	G	NA	C	NA	NA	G	NA	A	JAO' HAWN MAE JAN::IRGC 44022-2::[IRIS 313-11327]	IRIS 313-11327	IRGC 128061	ind3	67	C	T	C	C	C	C	C	C	C	T	C	-	-	-	-	C	-	G	C	T	T	-	A	-	G	G	C	T	C
IRIS_313-11331	NA	T	NA	NA	C	NA	NA	G	NA	C	NA	NA	G	NA	A	AMPIPIT::IRGC 44272-2::[IRIS 313-11331]	IRIS 313-11331	IRGC 132237	ind3	87											C	-	-	-	-	A	A	G	C	T			A	-	G	G	C	T	C
IRIS_313-11356	NA	T	NA	NA	C	NA	NA	G	NA	C	NA	NA	G	NA	A	CR 44-1::IRGC 45397-1::[IRIS 313-11356]	IRIS 313-11356		aro	104	C	T	T	-	-	-	C	C	C	T	T	T	A	G	A	C	-	G	C	T			A	-	G	G	C	T	C
IRIS_313-11357	NA	T	NA	NA	C	NA	NA	G	NA	C	NA	NA	G	NA	A	CR 579-1-3::IRGC 45443-2::[IRIS 313-11357]	IRIS 313-11357	IRGC 128021	ind1B	78	C	T	T	-	-	-	C	C	C	T	C	-	-	-	-	A	A	G	C	T	T	-	A	-	G	G	C	T	C
IRIS_313-11362	NA	T	NA	NA	C	NA	NA	G	NA	C	NA	NA	G	NA	A	KEYA NUNIA::IRGC 46117-2::[IRIS 313-11362]	IRIS 313-11362	IRGC 128080	aro	69	C	T	C	C	C	C	C	C	C	T	C	-	-	-	-	C	-	G	C	T	T	-			G	G	C	T	C
IRIS_313-11369	NA	T	NA	NA	C	NA	NA	G	NA	C	NA	NA	G	NA	A	RANACHANDRABHOG::IRGC 46567-2::[IRIS 313-11369]	IRIS 313-11369	IRGC 128146	ind2	89	C	T	T	-	-	-	C	C	C	T	C	-	-	-	-	A	A	G	C	T	T	-	A	-	G	G	C	T	C
IRIS_313-11371	NA	T	NA	NA	C	NA	NA	G	NA	C	NA	NA	G	NA	A	SATHI::IRGC 46659-1::[IRIS 313-11371]	IRIS 313-11371	IRGC 127788	aus	93.5	C	T	T	-	-	-	C	C	C	T	C	-	-	-	-	C	-				T	-	A	-	G	G	C	T	C
IRIS_313-11373	NA	T	NA	NA	C	NA	NA	G	NA	C	NA	NA	G	NA	A	T 3::IRGC 46760-2::[IRIS 313-11373]	IRIS 313-11373	IRGC 128177	aro	74	C	T	T	-	-	-	C	C	C	T	C	-	-	-	-	C	-	G	C	T	T	-	A	-	G	G	C	T	C
IRIS_313-11386	NA	T	NA	NA	C	NA	NA	G	NA	C	NA	NA	G	NA	A	KHAO DAWK MALI TIA::IRGC 47773-2::[IRIS 313-11386]	IRIS 313-11386	IRGC 128083	ind3	84	C	T	T	-	-	-	C	C	C	T	C	-	-	-	-	C	-	G	C	T	T	-	A	-	G	G	C	T	C
IRIS_313-11388	NA	T	NA	NA	C	NA	NA	G	NA	C	NA	NA	G	NA	A	GLAM::IRGC 47978-2::[IRIS 313-11388]	IRIS 313-11388	IRGC 132250	ind3	77.5	C	T	T	-	-	-	C	C	C	T	C	-	-	-	-	C	-	G	C	T	T	-	A	-	G	G	C	T	C
IRIS_313-11390	NA	T	NA	NA	C	NA	NA	G	NA	C	NA	NA	G	NA	A	NAH MOI::IRGC 48353-2::[IRIS 313-11390]	IRIS 313-11390	IRGC 128114	ind3	71	C	T	T	-	-	-	C	C	C	T	C	-	-	-	-	C	-	G	C	T	T	-	A	-	G	G	C	T	C
IRIS_313-11393	NA	T	NA	NA	C	NA	NA	G	NA	C	NA	NA	G	NA	A	SAWNG RUANG::IRGC 48458-2::[IRIS 313-11393]	IRIS 313-11393	IRGC 132267	ind3	94.5	C	T	T	-	-	-	C	C	C	T	C	-	-	-	-	C	-	G	C	T	T	-			G	G	C	T	C
IRIS_313-11394	NA	T	NA	NA	C	NA	NA	G	NA	C	NA	NA	G	NA	A	INDO NO 13030::IRGC 48630-2::[IRIS 313-11394]	IRIS 313-11394	IRGC 128057	indx	115	C	T					C	C	C	T	C	-	-	-	-	C	-	G	C	T	T	-	A	-	G	G	C	T	C
IRIS_313-11398	NA	T	NA	NA	C	NA	NA	G	NA	C	NA	NA	G	NA	C	TODULI::IRGC 48942-2::[IRIS 313-11398]	IRIS 313-11398	IRGC 128190	ind3	84.5	C	T	T	-	-	-	C	C	C	T	C	-	-	-	-	C	-	G	C	T	T	-			G	G	C	T	C
IRIS_313-11403	NA	T	NA	NA	C	NA	NA	G	NA	C	NA	NA	G	NA	A	AEB 368 RIP P TYPE ADT::IRGC 49359-2::[IRIS 313-11403]	IRIS 313-11403	IRGC 127923	indx	63	C	T	T	-	-	-	C	C	C	T	C	-	-	-	-	C	-	G	C	T	T	-			G	G	C	T	C
IRIS_313-11414	NA	T	NA	NA	C	NA	NA	G	NA	C	NA	NA	G	NA	A	KARUNJEERAGA SAMBA::IRGC 49774-1::[IRIS 313-11414]	IRIS 313-11414	IRGC 127495	indx	67	C	T	T	-	-	-	C	C	C	T	C	-	-	-	-	A	A	G	C	T	T	-	A	-	G	G	C	T	C
IRIS_313-11418	NA	T	NA	NA	C	NA	NA	G	NA	C	NA	NA	G	NA	A	MATALI::IRGC 49891-2::[IRIS 313-11418]	IRIS 313-11418	IRGC 128106	ind2	101	C	T					C	C	C	T	C	-	-	-	-	A	A	G	C	T			A	-	G	G	C	T	C
IRIS_313-11420	NA	T	NA	NA	C	NA	NA	G	NA	C	NA	NA	G	NA	A	PISINI::IRGC 50035-2::[IRIS 313-11420]	IRIS 313-11420	IRGC 128138	ind2	54	C	T	T	-	-	-	C	C	C	T	C	-	-	-	-	C	-	G	C	T	T	-			G	G	C	T	C
IRIS_313-11431	NA	T	NA	NA	C	NA	NA	G	NA	C	NA	NA	G	NA	A	C 166-135::IRGC 50633-1::[IRIS 313-11431]	IRIS 313-11431	IRGC 127244	ind3	95	C	T	T	-	-	-	C	C	C	T	C	-	-	-	-	A	A	G	C	T			C	C	G	G	C	T	C
IRIS_313-11443	NA	T	NA	NA	C	NA	NA	G	NA	C	NA	NA	G	NA	A	ARC 18533::IRGC 51756-1::[IRIS 313-11443]	IRIS 313-11443	IRGC 127161	indx	111	C	T	T	-	-	-	C	C	C	T						A	A	G	C	T	T	-	C	C	G	G	C	T	C
IRIS_313-11451	NA	T	NA	NA	C	NA	NA	G	NA	C	NA	NA	G	NA	A	KALISAL::IRGC 52324-1::[IRIS 313-11451]	IRIS 313-11451	IRGC 128330	aro	74.5	C	T	T	-	-	-	C	C	C	T	C	-	-	-	-	C	-	G	C	T	T	-	A	-	G	G	C	T	T/C
IRIS_313-11480	NA	T	NA	NA	C	NA	NA	G	NA	C	NA	NA	G	NA	A	PR 106::IRGC 53418-1::[IRIS 313-11480]	IRIS 313-11480	IRGC 127742	ind1B	71	C	T	T	-	-	-	C	C	C	T	C	-	-	-	-	C	-	G	C	T			A	-	G	G	C	T	C
IRIS_313-11513	NA	T	NA	NA	C	NA	NA	G	NA	C	NA	NA	G	NA	A	CHATO::IRGC 55825-1::[IRIS 313-11513]	IRIS 313-11513	IRGC 127269	ind1B	105	C	T	T	-	-	-	C	C	C	T	C	-	-	-	-	C	-	G	C	T	T	-	A	-	G	G	C	T	C
IRIS_313-11515	NA	T	NA	NA	C	NA	NA	G	NA	C	NA	NA	G	NA	A	BKN BR 1031-78-5-4::IRGC 55927-1::[IRIS 313-11515]	IRIS 313-11515	IRGC 127231	indx	91	C	T	T	-	-	-	C	C	C	T	T	T	A	G	A	C	-	G	C	T	T	-	A	-	G	G	C	T	C
IRIS_313-11521	NA	T	NA	NA	C	NA	NA	G	NA	C	NA	NA	G	NA	A	TAN NONG::IRGC 56126-1::[IRIS 313-11521]	IRIS 313-11521	IRGC 127847	indx	80.5	C	T	C	C	C	C	C	C	C	T	C	-	-	-	-	A	A	G	C	T	T	-	A	-	G	G	C	T	C
IRIS_313-11617	NA	T	NA	NA	C	NA	NA	G	NA	C	NA	NA	G	NA	A	UPRH 33::IRGC 61505-1::[IRIS 313-11617]	IRIS 313-11617	IRGC 128495	aus	92	C	T					C	C	C	T	T	T	A	G	A	A	A	G	C	T	T	-	A	-	G	G	C	T	C
IRIS_313-11620	NA	T	NA	NA	C	NA	NA	G	NA	C	NA	NA	G	NA	A	UPRH 197::IRGC 61641-1::[IRIS 313-11620]	IRIS 313-11620	IRGC 127876	aus	107	C	T	C	C	C	C	C	C	C	T	T	T	A	G	A	C	-	G	C	T	T	-	A	-	G	G	C	T	C
IRIS_313-11627	NA	T	NA	NA	C	NA	NA	G	NA	C	NA	NA	G	NA	A	JADO::IRGC 61966-1::[IRIS 313-11627]	IRIS 313-11627	IRGC 127448	aro	103											C	-	-	-	-	C	-	G	C	T			A	-	G	G	C	T	C
IRIS_313-11630	NA	T	NA	NA	C	NA	NA	G	NA	C	NA	NA	G	NA	A	POHHERLIMASION::IRGC 62025-1::[IRIS 313-11630]	IRIS 313-11630	IRGC 127737	aro	105	C	T	T	-	-	-	C	C	C	T	C	-	-	-	-	A	A	G	C	T	C	C	C	C	G	G	C	T	C
IRIS_313-11636	NA	T	NA	NA	C	NA	NA	G	NA	C	NA	NA	G	NA	A	NCS 271 A::IRGC 62216-1::[IRIS 313-11636]	IRIS 313-11636	IRGC 127654	aus	87																C	-	G	C	T	T	-	A	-	G	G	C	T	C
IRIS_313-11643	NA	T	NA	NA	C	NA	NA	G	NA	C	NA	NA	G	NA	A	NCS 603 B::IRGC 62377-1::[IRIS 313-11643]	IRIS 313-11643	IRGC 127662	ind1B	142.5	C	T	C	C	C	C	C	C	C	T	T	T	A	G	A	A	A	G	C	T	C	C	C	C	G	G	C	T	C
IRIS_313-11646	NA	T	NA	NA	C	NA	NA	G	NA	C	NA	NA	G	NA	A	NCS 771 A::IRGC 62483-1::[IRIS 313-11646]	IRIS 313-11646	IRGC 127665	ind2	130	C	T	T	-	-	-	C	C	C	T	T	T	A	G	A	A	A	G	C	T	T	-	A	-	G	G	C	T	C
IRIS_313-11647	NA	T	NA	NA	C	NA	NA	G	NA	C	NA	NA	G	NA	A	NCS 809 A::IRGC 62502-1::[IRIS 313-11647]	IRIS 313-11647	IRGC 127666	ind2	91	C	T	T	-	-	-	C	C	C	T	C	-	-	-	-	C	-	G	C	T	T	-			G	G	C	T	C
IRIS_313-11656	NA	T	NA	NA	C	NA	NA	G	NA	C	NA	NA	G	NA	A	B 3913 B 16-20 ST 28::IRGC 63099-1::[IRIS 313-11656]	IRIS 313-11656	IRGC 127196	indx	139.5	C	T					C	C	C	T	C	-	-	-	-	A	A	G	C	T	C	C	C	C	G	G	C	T	C
IRIS_313-11657	NA	T	NA	NA	C	NA	NA	G	NA	C	NA	NA	G	NA	A	EX WUKARI (WILD)::IRGC 63214-1::[IRIS 313-11657]	IRIS 313-11657		ind2	142.5	C	T	T	-	-	-	C	C	C	T	T	T	A	G	A	A	A	G	C	T	C	C	A	-	G	G	C	T	C
IRIS_313-11664	NA	T	NA	NA	C	NA	NA	G	NA	C	NA	NA	G	NA	A	CUN GU NUO::IRGC 63576-1::[IRIS 313-11664]	IRIS 313-11664	IRGC 127288	indx	150	C	T	C	C	C	C	C	C	C	T	C	-/T	-/A	-/G	-/A	A	A/T	G	C	T			C	C/T	G	G	C	T	C
IRIS_313-11668	NA	T	NA	NA	C	NA	NA	G	NA	C	NA	NA	G	NA	A	RONG DAO 4::IRGC 63820-1::[IRIS 313-11668]	IRIS 313-11668	IRGC 127771	ind1A	151	C	T	C	C	C	C	C	C	C	T	T	T	A	G	A	A	A	G	C	T	T	-	A	-/C	G	G	C	T	C
IRIS_313-11676	NA	T	NA	NA	C	NA	NA	G	NA	C	NA	NA	G	NA	A	E MOOM::IRGC 64291-1::[IRIS 313-11676]	IRIS 313-11676	IRGC 127359	ind3	116	C	T	T	-	-	-	C	C	C	T	C	-	-	-	-	A	A	G	C	T	T	-	C	C	G	G	C	T	C
IRIS_313-11677	NA	T	NA	NA	C	NA	NA	G	NA	C	NA	NA	G	NA	A	E NAWN KHAO::IRGC 64293-1::[IRIS 313-11677]	IRIS 313-11677	IRGC 128286	ind3	149	C	T	C	C	C	C	C	C	C	T	C	-	-	-	-	A	A	G	C	T	C	C	C	C	G	G	C	T	C
IRIS_313-11681	NA	T	NA	NA	C	NA	NA	G	NA	C	NA	NA	G	NA	A	KHAO' PAWM::IRGC 64416-2::[IRIS 313-11681]	IRIS 313-11681	IRGC 132426	ind3	153.5	C	T	C	C	C	C	C	C	C	T	T	T	A	G	A	A	A	G	C	T	T	-	C	C	G	G	C	T	C
IRIS_313-11682	NA	T	NA	NA	C	NA	NA	G	NA	C	NA	NA	G	NA	A	MA EUE::IRGC 64502-1::[IRIS 313-11682]	IRIS 313-11682	IRGC 127588	ind3	82	C	T	T	-	-	-	C	C	C	T	T	T	A	G	A	C	-	G	C	T			A	-	G	G	C	T	C
IRIS_313-11686	NA	T	NA	NA	C	NA	NA	G	NA	C	NA	NA	G	NA	A	QUAHNG LUANG::IRGC 64609-2::[IRIS 313-11686]	IRIS 313-11686	IRGC 132366	ind3	151	C	T	C	C	C	C	C	C	C	T	T	T	A	G	A	A	A	G	C	T	T	-	A	-	G	G	C	T	C
IRIS_313-11705	NA	T	NA	NA	C	NA	NA	G	NA	C	NA	NA	G	NA	A	DAWK PUD KHAO::IRGC 65808-1::[IRIS 313-11705]	IRIS 313-11705	IRGC 127303	ind3	138	C	T	T	-	-	-	C	C	C	T	C	-	-	-	-	A	A	G	C	T	C	C	A	-	G	G	C	T	T/C
IRIS_313-11706	NA	T	NA	NA	C	NA	NA	G	NA	C	NA	NA	G	NA	A	KHAO' NOK 4::IRGC 65932-1::[IRIS 313-11706]	IRIS 313-11706	IRGC 132001	ind3	128	C	T	C	C	C	C	C	C	C	T	C	-	-	-	-	A	A	G	C	T	T	-	C	C	G	G	C	T	C
IRIS_313-11712	NA	T	NA	NA	C	NA	NA	G	NA	C	NA	NA	G	NA	A	GORA DHAN 2::IRGC 66269-1::[IRIS 313-11712]	IRIS 313-11712	IRGC 127389	aus	114	C	T	C	C	C	C	C	C	C	T	T	T	A	G	A	A	A	G	C	T	C	C	C	C	G	G	C	T	C
IRIS_313-11721	NA	T	NA	NA	C	NA	NA	G	NA	C	NA	NA	G	NA	A	GAEW DAENG::IRGC 66707-1::[IRIS 313-11721]	IRIS 313-11721	IRGC 127372	ind3	141	C	T	T	-	-	-	C	C	C	T	T	T	A	G	A	A	A	G	C	T	C	C	C	C	G	G	C	T	C
IRIS_313-11723	NA	T	NA	NA	C	NA	NA	G	NA	C	NA	NA	G	NA	A	DISSIGBE::IRGC 66916-1::[IRIS 313-11723]	IRIS 313-11723	IRGC 127320	ind2	139	C	T	C	C	C	C	C	C	C	T	T	T	A	G	A	A	A	G	C	T	C	C	C	C	G	G	C	T	C
IRIS_313-11730	NA	T	NA	NA	C	NA	NA	G	NA	C	NA	NA	G	NA	A	QING ER XIAO 2::IRGC 67255-1::[IRIS 313-11730]	IRIS 313-11730	IRGC 127753	indx	143.5	C	T	C	C	C	C	C	C	C	T	T	T	A	G	A	A	A	G	C	T	T	-	C	C	G	G	C	T	C
IRIS_313-11737	NA	T	NA	NA	C	NA	NA	G	NA	C	NA	NA	G	NA	A	CHUNDI::IRGC 67486-1::[IRIS 313-11737]	IRIS 313-11737	IRGC 127283	aus	144.5	C	T	C	C	C	C	C	C	C	T	T	T	A	G	A	A	A	G	C	T	C	C	C	C	G	G	C	T	C
IRIS_313-11751	NA	T	NA	NA	C	NA	NA	G	NA	C	NA	NA	G	NA	A	L 10833::IRGC 68121-1::[IRIS 313-11751]	IRIS 313-11751	IRGC 127539	indx	136	C	T	T	-	-	-	C	C	C	T	C	-	-	-	-	A	A	G	C	T	T	-/C	A	-/C	G	G	C	T	C
IRIS_313-11765	NA	T	NA	NA	C	NA	NA	G	NA	C	NA	NA	G	NA	A	P 335::IRGC 69001-1::[IRIS 313-11765]	IRIS 313-11765	IRGC 127696	aro	62	C	T	T	-	-	-	C	C	C	T	C	-	-	-	-	C	-	G	C	T	T	-	A	-	G	G	C	T	C
IRIS_313-11766	NA	T	NA	NA	C	NA	NA	G	NA	C	NA	NA	G	NA	A	TSIMIAKABIJA::IRGC 69074-1::[IRIS 313-11766]	IRIS 313-11766	IRGC 128490	admix	81.5	C	T	T	-	-	-	C	C	C	T	C	-	-	-	-	A	A	G	C	T	T	-	A	-	G	G	C	T	C
IRIS_313-11801	NA	T	NA	NA	C	NA	NA	G	NA	C	NA	NA	G	NA	A	FAN WU::IRGC 70245-1::[IRIS 313-11801]	IRIS 313-11801	IRGC 127368	indx	150	C	T	T	-	-	-	C	C	C	T	T	T	A	G	A	A	A	G	C	T	C	C	C	C	G	G	C	T	C
IRIS_313-11819	NA	T	NA	NA	C	NA	NA	G	NA	C	NA	NA	G	NA	A	PADINTHUMA::IRGC 70762-2::[IRIS 313-11819]	IRIS 313-11819	IRGC 132362	ind3	151	C	T	C	C	C	C	C	C	C	T	C	-	-	-	-	A	A	G	C	T	C	C	C	C	G	G	C	T	C
IRIS_313-11833	NA	T	NA	NA	C	NA	NA	G	NA	C	NA	NA	G	NA	A	BOO MAE::IRGC 71058-1::[IRIS 313-11833]	IRIS 313-11833	IRGC 132276	ind3	90	C	T	T	-	-	-	C	C	C	T	C	-	-	-	-	A	A				T	-	C	C	G	G	C	T	C
IRIS_313-11837	NA	T	NA	NA	C	NA	NA	G	NA	C	NA	NA	G	NA	A	KHAO NAHNG PRUNG::IRGC 71220-1::[IRIS 313-11837]	IRIS 313-11837	IRGC 127514	ind3	98.5	C	T	T	-	-	-	C	C	C	T	C	-	-	-	-	C	-						A	-	G	G	C	T	C
IRIS_313-11840	NA	T	NA	NA	C	NA	NA	G	NA	C	NA	NA	G	NA	A	NIAW NAHK KRAD::IRGC 71352-1::[IRIS 313-11840]	IRIS 313-11840	IRGC 132412	ind3	95	C	T	T	-	-	-	C	C	C	T	C	-	-	-	-	C	-	G	C	T	T	-	C	C	G	G	C	T	C
IRIS_313-11841	NA	T	NA	NA	C	NA	NA	G	NA	C	NA	NA	G	NA	A	NIAW NARAI::IRGC 71353-1::[IRIS 313-11841]	IRIS 313-11841	IRGC 127679	ind3	97	C	T	T	-	-	-	C	C	C	T	C	-	-	-	-	C	-						A	-	G	G	C	T	C
IRIS_313-11842	NA	T	NA	NA	C	NA	NA	G	NA	C	NA	NA	G	NA	A	NIAW YUANG KHANUN::IRGC 71362-1::[IRIS 313-11842]	IRIS 313-11842		ind3	111	C	T	C	C	C	C	C	C	C	T	C	-	-	-	-	C	-	G	C	T	T	-	C	C	G	G	C	T	C
IRIS_313-11843	NA	T	NA	NA	C	NA	NA	G	NA	C	NA	NA	G	NA	A	PAN DAWK MAHK::IRGC 71380-1::[IRIS 313-11843]	IRIS 313-11843	IRGC 132290	ind3	94	C	T	T	-	-	-	C	C	C	T	C	-	-	-	-	C	-	G	C	T	T	-	A	-	G	G	C	T	C
IRIS_313-11849	NA	T	NA	NA	C	NA	NA	G	NA	C	NA	NA	G	NA	A	PULUT SELEMYAM::IRGC 71820-1::[IRIS 313-11849]	IRIS 313-11849	IRGC 128439	ind3	74											C	-	-	-	-	C	-	G	C	T	T	-	A	-	G	G	C	T
IRIS_313-11893	NA	T	NA	NA	C	NA	NA	G	NA	C	NA	NA	G	NA	A	KHAU DANH::IRGC 73201-1::[IRIS 313-11893]	IRIS 313-11893	IRGC 127519	indx	58	C	T	T	-	-	-	C	C	C	T	C	-	-	-	-	C	-	G	C	T	T	-	A	-	G	G	C	T	C
IRIS_313-11896	NA	T	NA	NA	C	NA	NA	G	NA	C	NA	NA	G	NA	A	CA HIM::IRGC 73246-1::[IRIS 313-11896]	IRIS 313-11896	IRGC 132394	ind3	75.5	C	T	T	-	-	-	C	C	C	T	C	-	-	-	-	A	A	G	C	T	T	-	A	-	G	G	C	T	C
IRIS_313-11898	NA	T	NA	NA	C	NA	NA	G	NA	C	NA	NA	G	NA	A	MA YOO::IRGC 73507-1::[IRIS 313-11898]	IRIS 313-11898	IRGC 127617	ind3	98	C	T	T	-	-	-	C	C	C	T	C	-	-	-	-	C	-	G	C	T	T	-	A	-	G	G	C	T	C
IRIS_313-11901	NA	T	NA	NA	C	NA	NA	G	NA	C	NA	NA	G	NA	A	TI NGI::IRGC 73620-1::[IRIS 313-11901]	IRIS 313-11901	IRGC 132301	ind3	72	C	T	T	-	-	-	C	C	C	T	C	-	-	-	-	C	-	G	C	T			A	-	G	G	C	T	C
IRIS_313-11902	NA	T	NA	NA	C	NA	NA	G	NA	C	NA	NA	G	NA	A	CEMPO TURI::IRGC 73667-1::[IRIS 313-11902]	IRIS 313-11902	IRGC 127251	ind3	86	C	T	T	-	-	-	C	C	C	T	C	-	-	-	-	A	A	G	C	T	T	-	C	C	G	G	C	T	C
IRIS_313-11917	NA	T	NA	NA	C	NA	NA	G	NA	C	NA	NA	G	NA	A	BUTNAPAR::IRGC 74734-1::[IRIS 313-11917]	IRIS 313-11917	IRGC 127241	aus	105							C	C	C	T	C	-	-	-	-	C	-	G	C	T	T	-	A	-	G	G	C	T	C
IRIS_313-11925	NA	T	NA	NA	C	NA	NA	G	NA	C	NA	NA	G	NA	A	SAWK GAM MAH::IRGC 75159-1::[IRIS 313-11925]	IRIS 313-11925	IRGC 132415	ind3	59	C	T	T	-	-	-	C	C	C	T	C	-	-	-	-	C	-	G	C	T					G	G	C	T	C
IRIS_313-11938	NA	T	NA	NA	C	NA	NA	G	NA	C	NA	NA	G	NA	A	GNASSOUMADOUGOU::IRGC 75595-1::[IRIS 313-11938]	IRIS 313-11938	IRGC 131988	indx	96	C	T	T	-	-	-	C	C	C	T	C	-	-	-	-	A	A	G	C	T	T	-	A	-	G	G	C	T	C
IRIS_313-11940	NA	T	NA	NA	C	NA	NA	G	NA	C	NA	NA	G	NA	A	MALOBA (DISSI ROUGE)::IRGC 75700-1::[IRIS 313-11940]	IRIS 313-11940	IRGC 127599	indx	97											C	-	-	-	-	C	-	G	C	T	C	C	C	C	G	G	C	T	C
IRIS_313-11947	NA	T	NA	NA	C	NA	NA	G	NA	C	NA	NA	G	NA	A	BIE LEI::IRGC 76478-1::[IRIS 313-11947]	IRIS 313-11947	IRGC 127226	indx	78	C	T	C	C	C	C	C	C	C	T	C	-	-	-	-	C	-				T	-	A	-	G	G	C	T	C
IRIS_313-11959	NA	T	NA	NA	C	NA	NA	G	NA	C	NA	NA	G	NA	A	KAGIOS PUTI::IRGC 76965-1::[IRIS 313-11959]	IRIS 313-11959	IRGC 135756	ind3	110.5	C	T	C	C	C	C	C	C	C	T	T	T	A	G	A	A	A	G	C	T	T	-	A	-	G	G	C	T	C
IRIS_313-11976	NA	T	NA	NA	C	NA	NA	G	NA	C	NA	NA	G	NA	A	PA MATIS::IRGC 77811-1::[IRIS 313-11976]	IRIS 313-11976	IRGC 135577	ind3	70	C	T	T	-	-	-	C	C	C	T	C	-	-	-	-	C	-
IRIS_313-11987	NA	T	NA	NA	C	NA	NA	G	NA	C	NA	NA	G	NA	A	IR 10120-7-2-1-4::IRGC 78628-1::[IRIS 313-11987]	IRIS 313-11987	IRGC 127433	indx	80	C	T	T	-	-	-	C	C	C	T	C	-	-	-	-	C	-	G	C	T	T	-	A	-	G	G	C	T	C
IRIS_313-11989	NA	T	NA	NA	C	NA	NA	G	NA	C	NA	NA	G	NA	A	TAMBAS JANGKOK::IRGC 78724-1::[IRIS 313-11989]	IRIS 313-11989	IRGC 132416	ind3	86	C	T	T	-	-	-	C	C	C	T	T	T	A	G	A	C	-	G	C	T	C	C	A	-	G	G	C	T	C
IRIS_313-11990	NA	T	NA	NA	C	NA	NA	G	NA	C	NA	NA	G	NA	A	TAISEN GLUTINOUS YU 1157::IRGC 78750-1::[IRIS 313-11990]	IRIS 313-11990	IRGC 127839	ind1B	62																A	A	G	C	T	T	-	A	-	G	G	C	T	C
IRIS_313-12000	NA	T	NA	NA	C	NA	NA	G	NA	C	NA	NA	G	NA	A	LAANG::IRGC 79258-1::[IRIS 313-12000]	IRIS 313-12000	IRGC 135569	ind3	115	C	T	C	C	C	C	C	C	C	T	C	-	-	-	-	A	A	G	C	T	T	-	A	-	G	G	C	T	C
IRIS_313-12011	NA	T	NA	NA	C	NA	NA	G	NA	C	NA	NA	G	NA	A	YU TOU ZHONG::IRGC 79749-1::[IRIS 313-12011]	IRIS 313-12011	IRGC 128510	indx	51	C	T	T	-	-	-	C	C	C	T	C	-	-	-	-	C	-						A	-	G	G	C	T	C
IRIS_313-12014	NA	T	NA	NA	C	NA	NA	G	NA	C	NA	NA	G	NA	A	ADANKARU::IRGC 79842-1::[IRIS 313-12014]	IRIS 313-12014	IRGC 127105	ind2	76											C	-	-	-	-	C	-	G	C	T	T	-	A	-	G	G	C	T
IRIS_313-12037	NA	T	NA	NA	C	NA	NA	G	NA	C	NA	NA	G	NA	A	KHMAO KDET::IRGC 81278-1::[IRIS 313-12037]	IRIS 313-12037	IRGC 132404	ind3	79	C	T	T	-	-	-	C	C	C	T	C	-	-	-	-	C	-	G	C	T	T	-	A	-	G	G	C	T	C
IRIS_313-12040	NA	T	NA	NA	C	NA	NA	G	NA	C	NA	NA	G	NA	A	NEANG LAU::IRGC 81328-1::[IRIS 313-12040]	IRIS 313-12040	IRGC 132285	ind3	102	C	T	C	C	C	C	C	C	C	T	T	T	A	G	A	A	A	G	C	T	T	-	C	C	G	G	C	T	C
IRIS_313-12044	NA	T	NA	NA	C	NA	NA	G	NA	C	NA	NA	G	NA	A	SAR SIEM::IRGC 81386-2::[IRIS 313-12044]	IRIS 313-12044	IRGC 135641	ind3	116	C	T	C	C	C	C	C	C	C	T	T	T	A	G	A	C	-	G	C	T	T	-	C	C	G	G	C	T	C
IRIS_313-12046	NA	T	NA	NA	C	NA	NA	G	NA	C	NA	NA	G	NA	A	KUJAM KURIT::IRGC 81477-1::[IRIS 313-12046]	IRIS 313-12046	IRGC 132282	ind3	58	C	T	C	C	C	C	C	C	C	T	T	T	A	G	A			G	C	T	T	-	A	-	G	G	C	T	C
IRIS_313-12074	NA	T	NA	NA	C	NA	NA	G	NA	C	NA	NA	G	NA	A	KYAIN WAR ME DONE::IRGC 82819-1::[IRIS 313-12074]	IRIS 313-12074	IRGC 132283	aro	86.5	C	T	T	-	-	-	C	C	C	T	C	-	-	-	-	C	-	G	C	T	T	-	C	C	G	G	C	T	C
IRIS_313-12079	NA	T	NA	NA	C	NA	NA	G	NA	C	NA	NA	G	NA	A	KASHMIRI::IRGC 83002-1::[IRIS 313-12079]	IRIS 313-12079		ind3	115	C	T	C	C	C	C	C	C	C	T	T	T	A	G	A	C	-	G	C	T	T	-	C	C	G	G	C	T	C
IRIS_313-12128	NA	T	NA	NA	C	NA	NA	G	NA	C	NA	NA	G	NA	A	HMA GNENG::IRGC 85751-1::[IRIS 313-12128]	IRIS 313-12128	IRGC 127408	ind3	75.5	C	T	T	-	-	-	C	C	C	T	C	-	-	-	-	A	A	G	C	T					G	G	C	T	C
IRIS_313-12130	NA	T	NA	NA	C	NA	NA	G	NA	C	NA	NA	G	NA	A	KHAO PA::IRGC 85972-1::[IRIS 313-12130]	IRIS 313-12130	IRGC 127559	ind3	80	C	T	T	-	-	-	C	C	C	T	C	-	-	-	-	A	A	G	C	T	T	-			G	G	C	T	C
IRIS_313-12147	NA	T	NA	NA	C	NA	NA	G	NA	C	NA	NA	G	NA	A	ARNG'-KAR PHAR ONG::IRGC 87196-1::[IRIS 313-12147]	IRIS 313-12147	IRGC 127171	ind3	69	C	T	C	C	C	C	C	C	C	T	C	-	-	-	-	C	-	G	C	T	T	-	A	-	G	G	C	T
IRIS_313-12161	NA	T	NA	NA	C	NA	NA	G	NA	C	NA	NA	G	NA	A	PA PHA EA::IRGC 87751-1::[IRIS 313-12161]	IRIS 313-12161	IRGC 127717	ind3	98	C	T	T	-	-	-	C	C	C	T	C	-	-	-	-	A	A	G	C	T	T	-	A	-	G	G	C	T	C
IRIS_313-12182	NA	T	NA	NA	C	NA	NA	G	NA	C	NA	NA	G	NA	A	NYAULI::IRGC 88628-1::[IRIS 313-12182]	IRIS 313-12182	IRGC 127686	indx	80																									G	G	C	T	C
IRIS_313-12183	NA	T	NA	NA	C	NA	NA	G	NA	C	NA	NA	G	NA	A	SETYA::IRGC 88654-1::[IRIS 313-12183]	IRIS 313-12183	IRGC 127796	aus	114	C	T	T	-	-	-	C	C	C	T	C	-	-	-	-	C	-	G	C	T	T	-	A	-	G	G	C	T	C
IRIS_313-12193	NA	T	NA	NA	C	NA	NA	G	NA	C	NA	NA	G	NA	A	DO NOUAN::IRGC 89648-1::[IRIS 313-12193]	IRIS 313-12193	IRGC 127341	ind3	79	C	T	T	-	-	-	C	C	C	T	C	-	-	-	-	C	-	G	C	T	T	-	A	-	G	G	C	T	C
IRIS_313-12222	NA	T	NA	NA	C	NA	NA	G	NA	C	NA	NA	G	NA	A	LAM BOUN::IRGC 91525-1::[IRIS 313-12222]	IRIS 313-12222	IRGC 127548	ind3	61	C	T	T	-	-	-	C	C	C	T	C	-	-	-	-	C	-	G	C	T					G	G	C	T	C
IRIS_313-12224	NA	T	NA	NA	C	NA	NA	G	NA	C	NA	NA	G	NA	A	NOON SOUNG::IRGC 91956-1::[IRIS 313-12224]	IRIS 313-12224	IRGC 127681	ind3	65	C	T	T	-	-	-	C	C	C	T	C	-	-	-	-	A	A	G	C	T	T	-	A	-	G	G	C	T	C
IRIS_313-12232	NA	T	NA	NA	C	NA	NA	G	NA	C	NA	NA	G	NA	A	TE SAN AI 2::IRGC 93355-1::[IRIS 313-12232]	IRIS 313-12232	IRGC 127852	indx	113.5	C	T	T	-	-	-	C	C	C	T	C	-	-	-	-	C	-	G	C	T	T	-	C	C	G	G	C	T	C
IRIS_313-12234	NA	T	NA	NA	C	NA	NA	G	NA	C	NA	NA	G	NA	A	ANLINGWUBAILI::IRGC 93363-1::[IRIS 313-12234]	IRIS 313-12234	IRGC 127124	ind1B	123	C	T	T	-	-	-	C	C	C	T	C	-	-	-	-	C	-	G	C	T	C	C	C	C	G	G	C	T	C
IRIS_313-12240	NA	T	NA	NA	C	NA	NA	G	NA	C	NA	NA	G	NA	A	PULUT MINYAK::IRGC 93615-1::[IRIS 313-12240]	IRIS 313-12240	IRGC 132294	ind3	74	C	T	T	-	-	-	C	C	C	T	C	-	-	-	-	C	-	G	C	T	T	-	A	-	G	G	C	T	C
IRIS_313-12249	NA	T	NA	NA	C	NA	NA	G	NA	C	NA	NA	G	NA	A	DAMNOUEB PHDAU PEN::IRGC 94176-1::[IRIS 313-12249]	IRIS 313-12249	IRGC 128271	ind3	83.5	C	T	T	-	-	-	C	C	C	T	C	-	-	-	-	A	A	G	C	T	T	-	A	-	G	G	C	T	C
IRIS_313-12263	NA	T	NA	NA	C	NA	NA	G	NA	C	NA	NA	G	NA	A	KHIE TOM::IRGC 95601-1::[IRIS 313-12263]	IRIS 313-12263	IRGC 127521	ind3	85.5											C	-	-	-	-	C	-	G	C	T	T	-	A	-	G	G	C	T	C
IRIS_313-12268	NA	T	NA	NA	C	NA	NA	G	NA	C	NA	NA	G	NA	A	MAYATAUNG::IRGC 95957-1::[IRIS 313-12268]	IRIS 313-12268	IRGC 127616	indx	129	C	T	T	-	-	-	C	C	C	T	C	-	-	-	-	A	A	G	C	T	T	-			G	G	C	T	C
IRIS_313-12270	NA	T	NA	NA	C	NA	NA	G	NA	C	NA	NA	G	NA	A	TOAM JUM::IRGC 96077-1::[IRIS 313-12270]	IRIS 313-12270	IRGC 127864	indx	61.5	C	T	T	-	-	-	C	C	C	T	C	-	-	-	-	C	-	G	C	T	T	-	A	-	G	G	C	T	C
IRIS_313-12287	NA	T	NA	NA	C	NA	NA	G	NA	C	NA	NA	G	NA	A	KAUK HNYINGWA::IRGC 97487-1::[IRIS 313-12287]	IRIS 313-12287	IRGC 127501	ind3	98.5	C	T					C	C	C	T	C	-	-	-	-	C	-						A	-	G	G	C	T	C
IRIS_313-12308	NA	T	NA	NA	C	NA	NA	G	NA	C	NA	NA	G	NA	A	SAM SI::IRGC 99020-1::[IRIS 313-12308]	IRIS 313-12308	IRGC 127782	ind3	113											C	-	-	-	-	C	-	G	C	T	T	-	A	-	G	G	C	T	C
IRIS_313-12354	NA	T	NA	NA	C	NA	NA	G	NA	C	NA	NA	G	NA	A	NASAENG::IRGC 107818-1::[IRIS 313-12354]	IRIS 313-12354	IRGC 127649	indx	77	C	T	T	-	-	-	C	C	C	T	C	-	-	-	-	A	A	G	C	T	T	-	A	-	G	G	C	T	C
IRIS_313-12355	NA	T	NA	NA	C	NA	NA	G	NA	C	NA	NA	G	NA	A	NASAENG::IRGC 107819-1::[IRIS 313-12355]	IRIS 313-12355	IRGC 127650	indx	98.5	C	T	C	C	C	C	C	C	C	T	T	T	A	G	A	A	A	G	C	T	T	-	A	-	G	G	C	T	C
IRIS_313-15896	NA	T	NA	NA	C	NA	NA	G	NA	C	NA	NA	G	NA	A	FEDEARROZ 50::G1::[IRIS 313-15896]	IRIS 313-15896	IRGC 126957	ind1B	41.5	C	T	T	-	-	-	C	C	C	T	C	-	-	-	-	C	-	G	C	T	T	-	A	-	G	G	C	T	C
IRIS_313-15898	NA	T	NA	NA	C	NA	NA	G	NA	C	NA	NA	G	NA	A	IR 4630-22-2-5-1-3::G1::[IRIS 313-15898]	IRIS 313-15898	IRGC 126962	indx	44	C	T	C	C	C	C	C	C	C	T	C	-	-	-	-	C	-	G	C	T	T	-	A	-	G	G	C	T	C
IRIS_313-15903	NA	T	NA	NA	C	NA	NA	G	NA	C	NA	NA	G	NA	A	IAC 165::IRGC 82775-2::[IRIS 313-15903]	IRIS 313-15903		indx	59	C	T	T	-	-	-	C	C	C	T	C	-	-	-	-	C	-	G	C	T	T	-	A	-	G	G	C	T	C
IRIS_313-15909	NA	T	NA	NA	C	NA	NA	G	NA	C	NA	NA	G	NA	A	IET 14720::IRTP 23179-G1::[IRIS 313-15909]	IRIS 313-15909	IRGC 126958	aro	75											C	-	-	-	-	C	-						A	-	G	G	C	T	C
IRIS_313-7635	NA	T	NA	NA	C	NA	NA	G	NA	C	NA	NA	G	NA	A	SEQ 93::C1::[IRIS 313-7635]	IRIS 313-7635	IRGC 122247	ind1B	56	C	T	T	-	-	-	C	C	C	T	C	-	-	-	-	C	-	G	C	T	T	-	A	-	G	G	C	T	C
IRIS_313-7641	NA	T	NA	NA	C	NA	NA	G	NA	C	NA	NA	G	NA	A	B 6144-MR-6-0-0::C1::[IRIS 313-7641]	IRIS 313-7641	IRGC 121974	indx	55	C	T	T	-	-	-	C	C	C	T	C	-	-	-	-	C	-								G	G	C	T	C
IRIS_313-7665	NA	T	NA	NA	C	NA	NA	G	NA	C	NA	NA	G	NA	A	CT 6510-24-1-2::C1::[IRIS 313-7665]	IRIS 313-7665	IRGC 122025	indx	67	C	T	T	-	-	-	C	C	C	T	T	T	A	G	A	A	A	G	C	T	T	-	A	-	G	G	C	T	C
IRIS_313-7696	NA	T	NA	NA	C	NA	NA	G	NA	C	NA	NA	G	NA	A	IR 55411-50::IRTP 16682-C1::[IRIS 313-7696]	IRIS 313-7696	IRGC 124394	indx	75	C	T	C	C	C	C	C	C	C	T	T	T	A	G	A	A	A	G	C	T	T	-			G	G	C	T	C
IRIS_313-7698	NA	T	NA	NA	C	NA	NA	G	NA	C	NA	NA	G	NA	A	IR 57920-AC 25-2-B::C1::[IRIS 313-7698]	IRIS 313-7698	IRGC 122098	indx	70	C	T	T	-	-	-	C	C	C	T	C	-	-	-	-	C	-	G	C	T	T	-	A	-	G	G	C	T	C
IRIS_313-7808	NA	T	NA	NA	C	NA	NA	G	NA	C	NA	NA	G	NA	A	WAS 173-B-B-6-2-2::C1::[IRIS 313-7808]	IRIS 313-7808	IRGC 122285	ind1B	147	C	T	C	C	C	C	C	C	C	T	T	T	A	G	A	A	A	G	C	T	C	C	C	C	G	G	C	T	C
IRIS_313-7924	NA	T	NA	NA	C	NA	NA	G	NA	C	NA	NA	G	NA	A	IRAT 335::C1::[IRIS 313-7924]	IRIS 313-7924	IRGC 122120	trop	100	C	T	T	-	-	-	C	C	C	T	C	-	-	-	-	A	A	G	C	T	T	-	C	C	G	G	C	T	C
IRIS_313-7933	NA	T	NA	NA	C	NA	NA	G	NA	C	NA	NA	G	NA	A	KAKANI 2::IRGC 13373-C1::[IRIS 313-7933]	IRIS 313-7933	IRGC 122128	admix	105	C	T	T	-	-	-	C	C	C	T	C	-	-	-	-	A	A	G	C	T	T	-	A	-	G	G	C	T	T/C
IRIS_313-8068	NA	T	NA	NA	C	NA	NA	G	NA	C	NA	NA	G	NA	A	ORIONE::GERVEX 333-C1::[IRIS 313-8068]	IRIS 313-8068	IRGC 122184	indx	70	C	T	T	-	-	-	C	C	C	T	C	-	-	-	-	C	-	G	C	T	T	-	A	-	G	G	C	T	C
IRIS_313-8292	NA	T	NA	NA	C	NA	NA	G	NA	C	NA	NA	G	NA	A	CARREON::[IRIS 313-8292]	IRIS 313-8292	IRGC 117442	ind3	76	C	T	C	C	C	C	C	C	C	T	C	-	-	-	-	A	A	G	C	T	T	-			G	G	C	T	C
IRIS_313-8306	NA	T	NA	NA	C	NA	NA	G	NA	C	NA	NA	G	NA	A	PULUTHI KARAN (MIXED)::IRGC 77530-1::[IRIS 313-8306]	IRIS 313-8306		indx	90.5	C	T	T	-	-	-	C	C	C	T	C	-	-	-	-	C	-								G	G	C	T	C
IRIS_313-8391	NA	T	NA	NA	C	NA	NA	G	NA	C	NA	NA	G	NA	A	MARAGBE::IRGC 69263-1::[IRIS 313-8391]	IRIS 313-8391		ind2	135	C	T	C	C	C	C	C	C	C	T	T	T	A	G	A	A	A	G	C	T	C	C	A	-	G	G	C	T	C
IRIS_313-8458	NA	T	NA	NA	C	NA	NA	G	NA	C	NA	NA	G	NA	A	ARC 18175::IRGC 42316-1::[IRIS 313-8458]	IRIS 313-8458	IRGC 131928	indx	77	C	T	T	-	-	-	C	C	C	T	C	-	-	-	-	C	-	G	C	T	T	-	A	-	G	G	C	T
IRIS_313-8492	NA	T	NA	NA	C	NA	NA	G	NA	C	NA	NA	G	NA	A	KUNENG::IRGC 71545-1::[IRIS 313-8492]	IRIS 313-8492	IRGC 126226	ind3	50	C	T	T	-	-	-	C	C	C	T	C	-	-	-	-	A	A	G	C	T	T	-	A	-	G	G	C	T	C
IRIS_313-8530	NA	T	NA	NA	C	NA	NA	G	NA	C	NA	NA	G	NA	A	DHANE BURWA::IRGC 10105-1::[IRIS 313-8530]	IRIS 313-8530	IRGC 126199	ind2	108	C	T	T	-	-	-	C	C	C	T	C	-	-	-	-	A	A	G	C	T	T	-	A	-	G	G	C	T	C
IRIS_313-8536	NA	T	NA	NA	C	NA	NA	G	NA	C	NA	NA	G	NA	A	NG KARAN DE::IRGC 43489-1::[IRIS 313-8536]	IRIS 313-8536	IRGC 135539	ind3	96	C	T	C	C	C	C	C	C	C	T	T	T	A	G	A	C	-	G	C	T	T	-	A	-	G	G	C	T	C
IRIS_313-8568	NA	T	NA	NA	C	NA	NA	G	NA	C	NA	NA	G	NA	A	LARHA MUGAD::IRGC 52339-1::[IRIS 313-8568]	IRIS 313-8568	IRGC 125619	ind2	124	C	T	T	-	-	-	C	C	C	T	C	-	-	-	-	C	-	G	C	T	T	-	A	-	G	G	C	T	C
IRIS_313-8585	NA	T	NA	NA	C	NA	NA	G	NA	C	NA	NA	G	NA	A	ARC 11901::IRGC 21727-1::[IRIS 313-8585]	IRIS 313-8585	IRGC 127033	indx	100	C	T	T	-	-	-	C	C	C	T	C	-	-	-	-	A	A	G	C	T	T	-	C	C	G	G	C	T	C
IRIS_313-8586	NA	T	NA	NA	C	NA	NA	G	NA	C	NA	NA	G	NA	A	PLI KHAO::IRGC 64596-1::[IRIS 313-8586]	IRIS 313-8586	IRGC 126081	ind3	108	C	T	T	-	-	-	C	C	C	T	C	-	-	-	-	C	-	G	C	T			A	-/C	G	G	C	T	C
IRIS_313-8591	NA	T	NA	NA	C	NA	NA	G	NA	C	NA	NA	G	NA	A	SIAM ER 32::IRGC 13917-1::[IRIS 313-8591]	IRIS 313-8591	IRGC 135543	ind3	66											C	-	-	-	-	C	-	G	C	T			A	-	G	G	C	T	C
IRIS_313-8608	NA	T	NA	NA	C	NA	NA	G	NA	C	NA	NA	G	NA	A	SI HAO NDURIA::IRGC 66649-1::[IRIS 313-8608]	IRIS 313-8608	IRGC 132385	ind3	61																		G	C	T	T	-	A	-	G	G	C	T	C
IRIS_313-8621	NA	T	NA	NA	C	NA	NA	G	NA	C	NA	NA	G	NA	C	ARC 11663::IRGC 42695-1::[IRIS 313-8621]	IRIS 313-8621	IRGC 126174	ind1B	71	C	T	T	-	-	-	C	C	C	T	C	-	-	-	-	A	A	G	C	T	T	-	A	-	G	G	C	T	C
IRIS_313-8681	NA	T	NA	NA	C	NA	NA	G	NA	C	NA	NA	G	NA	A	KOLITONDO::IRGC 66497-1::[IRIS 313-8681]	IRIS 313-8681		ind3	118.5	C	T	C	C	C	C	C	C	C	T	T	T	A	G	A	A	A	G	C	T	T	-	A	-	G	G	C	T	C
IRIS_313-8767	NA	T	NA	NA	C	NA	NA	G	NA	C	NA	NA	G	NA	A	SIDIK::IRGC 66643-1::[IRIS 313-8767]	IRIS 313-8767		ind3	63	C	T	T	-	-	-	C	C	C	T	C	-	-	-	-	C	-	G	C	T	T	-	A	-	G	G	C	T	C
IRIS_313-8771	NA	T	NA	NA	C	NA	NA	G	NA	C	NA	NA	G	NA	A	SIMUL KHURI::IRGC 35154-1::[IRIS 313-8771]	IRIS 313-8771	IRGC 121120	aus	45	C	T	T	-	-	-	C	C	C	T	C	-	-	-	-	C	-								G	G	C	T	C
IRIS_313-8791	NA	T	NA	NA	C	NA	NA	G	NA	C	NA	NA	G	NA	A	ARANG::[IRIS 313-8791]	IRIS 313-8791	IRGC 117423	ind3	62	C	T	T	-	-	-	C	C	C	T	C	-	-	-	-	C	-	G	C	T	T	-	A	-	G	G	C	T	C
IRIS_313-8812	NA	T	NA	NA	C	NA	NA	G	NA	C	NA	NA	G	NA	A	RELLY::IRGC 14623-1::[IRIS 313-8812]	IRIS 313-8812	IRGC 126160	ind3	53	C	T					C	C	C	T	C	-	-	-	-	C	-	G	C	T	T	-	A	-	G	G	C	T	C
IRIS_313-8822	NA	T	NA	NA	C	NA	NA	G	NA	C	NA	NA	G	NA	A	STRAW 23-400::IRGC 38390-1::[IRIS 313-8822]	IRIS 313-8822		aus	59.5	C	T	T	-	-	-	C	C	C	T	C	-	-	-	-	C	-	G	C	T	T	-	A	-	G	G	C	T	C
IRIS_313-8864	NA	T	NA	NA	C	NA	NA	G	NA	C	NA	NA	G	NA	A	NOROI::IRGC 31611-1::[IRIS 313-8864]	IRIS 313-8864	IRGC 121069	aus	131.5	C	T	C	C	C	C	C	C	C	T	T	T	A	G	A	A	A	G	C	T	C	C			G	G	C	T	C
IRIS_313-8922	NA	T	NA	NA	C	NA	NA	G	NA	C	NA	NA	G	NA	A	AGAI 1::IRGC 24532-1::[IRIS 313-8922]	IRIS 313-8922		ind2	93	C	T	C	C	C	C	C	C	C	T	C	-	-	-	-	C	-	G	C	T	T	-	A	-	G	G	C	T	C
IRIS_313-8948	NA	T	NA	NA	C	NA	NA	G	NA	C	NA	NA	G	NA	A	BUCAYAB::IRGC 44357-1::[IRIS 313-8948]	IRIS 313-8948	IRGC 126974	ind3	133	C	T	C	C	C	C	C	C	C	T	T	T	A	G	A	A	A	G	C	T	T	-	A	-	G	G	C	T	C
IRIS_313-8985	NA	T	NA	NA	C	NA	NA	G	NA	C	NA	NA	G	NA	A	KHAO' HAWM::IRGC 78257-1::[IRIS 313-8985]	IRIS 313-8985	IRGC 126153	ind3	89	C	T	T	-	-	-	C	C	C	T	C	-	-	-	-	A	A						C	C	G	G	C	T	C
IRIS_313-8996	NA	T	NA	NA	C	NA	NA	G	NA	C	NA	NA	G	NA	A	SRAU SENG::IRGC 30290-1::[IRIS 313-8996]	IRIS 313-8996	IRGC 126169	ind3	65.5	C	T	T	-	-	-	C	C	C	T	C	-	-	-	-	A	A	G	C	T	T	-	A	-	G	G	C	T	C
IRIS_313-9032	NA	T	NA	NA	C	NA	NA	G	NA	C	NA	NA	G	NA	A	KHAO GRADOOK CHAHNG::IRGC 17111-1::[IRIS 313-9032]	IRIS 313-9032	IRGC 125800	ind1B	75	C	T	T	-	-	-	C	C	C	T	C	-	-	-	-	C	-	G	C	T	T	-	C	C	G	G	C	T	C
IRIS_313-9062	NA	T	NA	NA	C	NA	NA	G	NA	C	NA	NA	G	NA	A	MAE MAI LUD NI::IRGC 66065-1::[IRIS 313-9062]	IRIS 313-9062	IRGC 125831	ind3	85	C	T	T	-	-	-	C	C	C	T	C	-	-	-	-	A	A	G	C	T	T	-	A	-	G	G	C	T	C
IRIS_313-9083	NA	T	NA	NA	C	NA	NA	G	NA	C	NA	NA	G	NA	A	PANKHARI 203::[IRIS 313-9083]	IRIS 313-9083	IRGC 117551	aro	46	C	T					C	C	C	T	C	-	-	-	-	C	-								G	G	C	T
IRIS_313-9098	NA	T	NA	NA	C	NA	NA	G	NA	C	NA	NA	G	NA	A	SI MERIA::IRGC 66659-1::[IRIS 313-9098]	IRIS 313-9098		ind3	74	C	T	T	-	-	-	C	C	C	T	C	-	-	-	-	C	-	G	C	T	T	-	C	C	G	G	C	T	C
IRIS_313-9112	NA	T	NA	NA	C	NA	NA	G	NA	C	NA	NA	G	NA	A	LEUANG YAI 344::IRGC 651-1::[IRIS 313-9112]	IRIS 313-9112	IRGC 125826	ind3	109.5	C	T	C	C	C	C	C	C	C	T	T	T	A	G	A	A	A	G	C	T	T	-	C	C	G	G	C	T	C
IRIS_313-9115	NA	T	NA	NA	C	NA	NA	G	NA	C	NA	NA	G	NA	A	LEUANG YAI 29-12-2::IRGC 881-1::[IRIS 313-9115]	IRIS 313-9115	IRGC 126157	ind3	49.5	C	T					C	C	C	T	C	-	-	-	-	C	-	G	C	T	C	C	A	-
IRIS_313-9116	NA	T	NA	NA	C	NA	NA	G	NA	C	NA	NA	G	NA	A	LEUANG YAI 2 B 72::IRGC 882-1::[IRIS 313-9116]	IRIS 313-9116	IRGC 126138	ind3	119.5	C	T	T	-	-	-	C	C	C	T	C	-	-	-	-	A	A	G	C	T	T	-			G	G	C	T	C
IRIS_313-9227	NA	T	NA	NA	C	NA	NA	G	NA	C	NA	NA	G	NA	A	WP 65::IRGC 36526-1::[IRIS 313-9227]	IRIS 313-9227	IRGC 126013	ind1B	87	C	T	T	-	-	-	C	C	C	T	C	-	-	-	-	C	-	G	C	T			A	-	G	G	C	T	C
IRIS_313-9288	NA	T	NA	NA	C	NA	NA	G	NA	C	NA	NA	G	NA	A	TONG MAH::IRGC 65577-1::[IRIS 313-9288]	IRIS 313-9288		ind3	65	C	T	T	-	-	-	C	C	C	T	C	-	-	-	-	A	A	G	C	T	T	-	A	-
IRIS_313-9294	NA	T	NA	NA	C	NA	NA	G	NA	C	NA	NA	G	NA	A	AUS 78-62::IRGC 69456-1::[IRIS 313-9294]	IRIS 313-9294	IRGC 131929	ind2	136	C	T	T	-	-	-	C	C	C	T	C	-	-	-	-	A	A	G	C	T	T	-	A	-	G	G	C	T	C
IRIS_313-9357	NA	T	NA	NA	C	NA	NA	G	NA	C	NA	NA	G	NA	A	HAM 48::IRGC 29740-1::[IRIS 313-9357]	IRIS 313-9357	IRGC 128532	ind3	73	C	T	T	-	-	-	C	C	C	T	C	-	-	-	-	C	-	G	C	T	T	-	C	C	G	G	C	T	C
IRIS_313-9368	NA	T	NA	NA	C	NA	NA	G	NA	C	NA	NA	G	NA	A	CHANDARHAT::IRGC 25845-1::[IRIS 313-9368]	IRIS 313-9368	IRGC 121605	aus	66.5	C	T	T	-	-	-	C	C	C	T	C	-	-	-	-	C	-	G	C	T	T	-	A	-	G	G	C	T
IRIS_313-9402	NA	T	NA	NA	C	NA	NA	G	NA	C	NA	NA	G	NA	A	PA FADAYA::IRGC 58524-1::[IRIS 313-9402]	IRIS 313-9402	IRGC 131944	indx	100.5	C	T	C	C	C	C	C	C	C	T	C	-	-	-	-	C	-	G	C	T			A	-	G	G	C	T	C
IRIS_313-9415	NA	T	NA	NA	C	NA	NA	G	NA	C	NA	NA	G	NA	A	PAHK NOK GAEW::IRGC 64572-1::[IRIS 313-9415]	IRIS 313-9415		ind3	81	C	T	T	-	-	-	C	C	C	T	C	-	-	-	-	A	A	G	C	T	T	-	A	-					C
IRIS_313-9472	NA	T	NA	NA	C	NA	NA	G	NA	C	NA	NA	G	NA	A	H 6::IRGC 157-1::[IRIS 313-9472]	IRIS 313-9472	IRGC 125756	indx	107											C	-	-	-	-	A	A	G	C	T	T	-	A	-	G	G	C	T	C
IRIS_313-9503	NA	T	NA	NA	C	NA	NA	G	NA	C	NA	NA	G	NA	A	BINUHANGIN::IRGC 67429-1::[IRIS 313-9503]	IRIS 313-9503	IRGC 125683	indx	48																C	-	G	C	T	T	-	A	-	G	G	C	T	C
IRIS_313-9522	NA	T	NA	NA	C	NA	NA	G	NA	C	NA	NA	G	NA	A	RPW 9-4 (SS 1)::IRGC 50690-1::[IRIS 313-9522]	IRIS 313-9522	IRGC 126084	indx	91	C	T	T	-	-	-	C	C	C	T	C	-	-	-	-	C	-	G	C	T	T	-	A	-	G	G	C	T	C
IRIS_313-9555	NA	T	NA	NA	C	NA	NA	G	NA	C	NA	NA	G	NA	A	CHUA DAU::IRGC 4785-1::[IRIS 313-9555]	IRIS 313-9555	IRGC 120914	indx	85	C	T	T	-	-	-	C	C	C	T	C	-	-	-	-	C	-	G	C	T	T	-			G	G	C	T	C
IRIS_313-9566	NA	T	NA	NA	C	NA	NA	G	NA	C	NA	NA	G	NA	A	RP 9-4::IRGC 39735-1::[IRIS 313-9566]	IRIS 313-9566	IRGC 126004	ind1B	84.5	C	T	C	C	C	C	C	C	C	T	C	-	-	-	-	A	A	G	C	T	T	-	A	-	G	G	C	T	C
IRIS_313-9600	NA	T	NA	NA	C	NA	NA	G	NA	C	NA	NA	G	NA	A	E LONG MAH::IRGC 47946-1::[IRIS 313-9600]	IRIS 313-9600	IRGC 126133	indx	76	C	T	T	-	-	-	C	C	C	T	C	-	-	-	-	A	A	G	C	T			A	-	G	G	C	T	C
IRIS_313-9694	NA	T	NA	NA	C	NA	NA	G	NA	C	NA	NA	G	NA	A	UNGGUL::IRGC 71644-1::[IRIS 313-9694]	IRIS 313-9694	IRGC 131951	ind3	84.5	C	T	T	-	-	-	C	C	C	T	C	-	-	-	-	C	-	G	C	T	T	-	A	-	G	G	C	T	C
IRIS_313-9695	NA	T	NA	NA	C	NA	NA	G	NA	C	NA	NA	G	NA	A	SOLAY GHAT::IRGC 73121-1::[IRIS 313-9695]	IRIS 313-9695	IRGC 131919	aus	81.5	C	T	T	-	-	-	C	C	C	T	C	-	-	-	-	C	-	G	C	T	T	-	A	-	G	G	C	T	C
IRIS_313-9696	NA	T	NA	NA	C	NA	NA	G	NA	C	NA	NA	G	NA	A	NAZIRA SAIL::IRGC 77284-1::[IRIS 313-9696]	IRIS 313-9696	IRGC 125850	indx	60	C	T	T	-	-	-	C	C	C	T	C	-	-	-	-	C	-	G	C	T	T	-	A	-	G	G	C	T
IRIS_313-9727	NA	T	NA	NA	C	NA	NA	G	NA	C	NA	NA	G	NA	A	NAN TE HAO::IRGC 59797-1::[IRIS 313-9727]	IRIS 313-9727	IRGC 125849	ind1A	108.5	C	T	T	-	-	-	C	C	C	T	T	T	A	G	A	C	-	G	C	T	T	-	A	-	G	G	C	T	C
IRIS_313-9767	NA	T	NA	NA	C	NA	NA	G	NA	C	NA	NA	G	NA	A	CI 9445::IRGC 2081-1::[IRIS 313-9767]	IRIS 313-9767	IRGC 125711	indx	73	C	T	T	-	-	-	C	C	C	T	T	T	A	G	A	C	-	G	C	T	T	-	C	C	G	G	C	T	C
IRIS_313-9809	NA	T	NA	NA	C	NA	NA	G	NA	C	NA	NA	G	NA	A	NALUMOOLAI KARUPAN::IRGC 8993-1::[IRIS 313-9809]	IRIS 313-9809		ind3	59.5	C	T	T	-	-	-	C	C	C	T	C	-	-	-	-	C	-	G	C	T	T	-			G	G	C	T
IRIS_313-9841	NA	T	NA	NA	C	NA	NA	G	NA	C	NA	NA	G	NA	A	SML AWINI::IRGC 13391-1::[IRIS 313-9841]	IRIS 313-9841	IRGC 125904	indx	94	C	T	C	C	C	C	C	C	C	T	C	-	-	-	-	C	-	G	C	T	C	C	A	-	G	G	C	T	C
IRIS_313-9861	NA	T	NA	NA	C	NA	NA	G	NA	C	NA	NA	G	NA	A	KURKARUPPAN::IRGC 15449-1::[IRIS 313-9861]	IRIS 313-9861		aus	59											C	-	-	-	-	C	-				T	-	A	-					C
IRIS_313-9867	NA	T	NA	NA	C	NA	NA	G	NA	C	NA	NA	G	NA	A	SIGARDIS::IRGC 15555-1::[IRIS 313-9867]	IRIS 313-9867	IRGC 126088	ind1B	76	C	T	T	-	-	-	C	C	C	T	C	-	-	-	-	A	A	G	C	T	T	-	C	C	G	G	C	T
IRIS_313-9898	NA	T	NA	NA	C	NA	NA	G	NA	C	NA	NA	G	NA	A	QUERO ASSAN::IRGC 28860-1::[IRIS 313-9898]	IRIS 313-9898	IRGC 125880	ind3	68	C	T	T	-	-	-	C	C	C	T	C	-	-	-	-	A	A	G	C	T	T	-	A	-	G	G	C	T
IRIS_313-9925	NA	T	NA	NA	C	NA	NA	G	NA	C	NA	NA	G	NA	A	MILYANG 30::IRGC 46977-1::[IRIS 313-9925]	IRIS 313-9925	IRGC 125839	ind1B	77	C	T	T	-	-	-	C	C	C	T	C	-	-	-	-	A	A	G	C	T	T	-	A	-	G	G	C	T	C
IRIS_313-9935	NA	T	NA	NA	C	NA	NA	G	NA	C	NA	NA	G	NA	A	MEKENZIE SMALL::IRGC 49895-1::[IRIS 313-9935]	IRIS 313-9935	IRGC 126167	ind2	119	C	T	C	C	C	C	C	C	C	T	T	T	A	G	A	C	-	G	C	T	T	-	A	-	G	G	C	T	C
IRIS_313-9940	NA	T	NA	NA	C	NA	NA	G	NA	C	NA	NA	G	NA	A	TIKAL 3::IRGC 50649-1::[IRIS 313-9940]	IRIS 313-9940	IRGC 125923	ind1B	51	C	T	T	-	-	-	C	C	C	T	C	-	-	-	-	C	-						A	-	G	G	C	T	C
IRIS_313-9953	NA	T	NA	NA	C	NA	NA	G	NA	C	NA	NA	G	NA	A	BAMOA A 75::IRGC 51101-1::[IRIS 313-9953]	IRIS 313-9953	IRGC 125671	indx	126	C	T	C	C	C	C	C	C	C	T	T	T	A	G	A	A	A	G	C	T	T	-	A	-	G	G	C	T	C
IRIS_313-9966	NA	T	NA	NA	C	NA	NA	G	NA	C	NA	NA	G	NA	A	CICA 9::IRGC 53079-1::[IRIS 313-9966]	IRIS 313-9966	IRGC 125713	ind1B	115.5	C	T	T	-	-	-	C	C	C	T	C	-	-	-	-	A	A	G	C	T	T	-	A	-	G	G	C	T	C
IRIS_313-9968	NA	T	NA	NA	C	NA	NA	G	NA	C	NA	NA	G	NA	A	KULA KARUPPAN::IRGC 55328-1::[IRIS 313-9968]	IRIS 313-9968	IRGC 125810	indx	112	C	T					C	C	C	T						C	-	G	C	T			A	-	G	G	C	T	C
IRIS_313-9978	NA	T	NA	NA	C	NA	NA	G	NA	C	NA	NA	G	NA	A	IRAT 118::IRGC 55785-1::[IRIS 313-9978]	IRIS 313-9978		aro	76											C	-	-	-	-	C	-	G	C	T	T	-			G	G	C	T	C
IRIS_313-9986	NA	T	NA	NA	C	NA	NA	G	NA	C	NA	NA	G	NA	A	SOM DIGUIME::IRGC 56751-1::[IRIS 313-9986]	IRIS 313-9986	IRGC 126168	indx	76	C	T	T	-	-	-	C	C	C	T	C	-	-	-	-	A	A	G	C	T	T	-	A	-	G	G	C	T	C
IRIS_313-10587	NA	NA	NA	NA	C	NA	NA	G	NA	C	NA	NA	G	NA	A	DB 3::IRGC 8361-1::[IRIS 313-10587]	IRIS 313-10587	IRGC 127308	aus	81	C	T	T	-	-	-	C	C	C	T	C	-	-	-	-	C	-	G	C	T	T	-	A	-	G	G	C	T	C
IRIS_313-10640	NA	NA	NA	NA	C	NA	NA	G	NA	C	NA	NA	G	NA	A	SR 26 B::IRGC 10803-2::[IRIS 313-10640]	IRIS 313-10640	IRGC 128169	ind2	42	C	T	T	-	-	-	C	C	C	T	C	-	-	-	-	C	-						A	-	G	G	C	T	C
IRIS_313-10864	NA	NA	NA	NA	C	NA	NA	G	NA	C	NA	NA	G	NA	A	ARC 11338::IRGC 21329-1::[IRIS 313-10864]	IRIS 313-10864	IRGC 127136	admix	109	C	T	T	-	-	-	C	C	C	T	C	-	-	-	-	C	-	G	C	T	T	-			G	G	C	T	C
IRIS_313-10911	NA	NA	NA	NA	C	NA	NA	G	NA	C	NA	NA	G	NA	A	NEANG NARY::IRGC 23084-1::[IRIS 313-10911]	IRIS 313-10911		ind3	59	C	T	T	-	-	-	C	C	C	T	C	-	-	-	-	C	-	G	C	T	T	-	A	-	G	G	C	T	C
IRIS_313-8679	NA	NA	NA	NA	C	NA	NA	G	NA	C	NA	NA	G	NA	A	JAO LEUANG::IRGC 65866-1::[IRIS 313-8679]	IRIS 313-8679	IRGC 126216	ind3	45	C	T	T	-	-	-	C	C	C	T	C	-	-	-	-	C	-	G	C	T	T	-	A	-	G	G	C	T	C
IRIS_313-9557	NA	NA	NA	NA	C	NA	NA	G	NA	C	NA	NA	G	NA	A	MULLIKURUVA::IRGC 77529-1::[IRIS 313-9557]	IRIS 313-9557	IRGC 125845	ind2	94	C	T	T	-	-	-	C	C	C	T	C	-	-	-	-	C	-	G	C	T	T	-	A	-	G	G	C	T	C
CX104	NA	C/T	NA	NA	C	NA	NA	G	NA	C	NA	NA	G	NA	A	SADRI RICE 1::[CX104]	CX104	IRGC 136037	aro	67.5	C	T	T	-	-	-	C	C	C	T	C	-	-	-	-	A	A	G	C	T	T	-	A	-	G	G	C	T	T/C
CX86	NA	C/T	NA	NA	C	NA	NA	G	NA	C	NA	NA	G	NA	A	C70::[CX86]	CX86		indx	15	C	T	T	-	-	-	C	C	C	T	C	-	-	-	-	C	-	G	C	T	T	-	A	-	G	G	C	T
IRIS_313-10755	NA	C/T	NA	NA	C	NA	NA	G	NA	C	NA	NA	G	NA	A	NEP BA BONG TO::IRGC 17005-2::[IRIS 313-10755]	IRIS 313-10755	IRGC 128116	ind3	64	C	T	T	-	-	-	C	C	C	T	C	-	-	-	-	A	A	G	C	T	T	-	A	-	G	G	C	T	C
IRIS_313-11031	NA	C/T	NA	NA	C	NA	NA	G	NA	C	NA	NA	G	NA	A	NAWAN SATHRA BAGAR 344::IRGC 28079-1::[IRIS 313-11031]	IRIS 313-11031	IRGC 128403	aus	23.5	C	T	T	-	-	-	C	C	C	T	C	-	-	-	-	C	-	G	C	T	T	-	A	-	G	G	C	T
IRIS_313-11280	NA	C/T	NA	NA	C	NA	NA	G	NA	C	NA	NA	G	NA	A	ARC 15486::IRGC 42055-1::[IRIS 313-11280]	IRIS 313-11280	IRGC 135735	indx	94	C	T					C	C	C	T	C	-	-	-	-			G	C	T	T	-	A	-	G	G	C	T	C
IRIS_313-11666	NA	C/T	NA	NA	C	NA	NA	G	NA	C	NA	NA	G	NA	A	LONG GE 33::IRGC 63705-1::[IRIS 313-11666]	IRIS 313-11666	IRGC 127573	indx	98	C	T	T	-	-	-	C	C	C	T	C	-	-	-	-	A	A	G	C	T	T	-	A	-	G	G	C	T	C
IRIS_313-11688	NA	C/T	NA	NA	C	NA	NA	G	NA	C	NA	NA	G	NA	A	SIA MOO::IRGC 64629-1::[IRIS 313-11688]	IRIS 313-11688	IRGC 135581	ind3	58	C	T	T	-	-	-	C	C	C	T	C	-	-	-	-	A	A												C
IRIS_313-12013	NA	C/T	NA	NA	C	NA	NA	G	NA	C	NA	NA	G	NA	A	RAUSRR 4::IRGC 79785-1::[IRIS 313-12013]	IRIS 313-12013	IRGC 127767	ind2	60											C	-	-	-	-	C	-	G	C	T	T	-	A	-
IRIS_313-8655	NA	C/T	NA	NA	C	NA	NA	G	NA	C	NA	NA	G	NA	A	TAK::IRGC 73124-1::[IRIS 313-8655]	IRIS 313-8655	IRGC 121582	aus	49											C	-	-	-	-	A	A	G	C	T					G	G	C	T	C
IRIS_313-8747	NA	C/T	NA	NA	C	NA	NA	G	NA	C	NA	NA	G	NA	A	DOM ZARD::[IRIS 313-8747]	IRIS 313-8747	IRGC 117466	aro	79	C	T	T	-	-	-	C	C	C	T	C	-	-	-	-	C	-	G	C	T			A	-	G	G	C	T	C
IRIS_313-10905	NA	C	NA	NA	C	NA	NA	G	NA	C	NA	NA	G	NA	A	KUOL DAUN THNONG::IRGC 22986-1::[IRIS 313-10905]	IRIS 313-10905		ind3	72.5	C	T	T	-	-	-	C	C	C	T	C	-	-	-	-	C	-	G	C	T			A	-	G	G	C	T	C
IRIS_313-10907	NA	C	NA	NA	C	NA	NA	G	NA	C	NA	NA	G	NA	A	MARECH S V R::IRGC 23011-2::[IRIS 313-10907]	IRIS 313-10907	IRGC 128105	ind3	49	C	T	T	-	-	-	C	C	C	T	C	-	-	-	-										G	G	C	T	C
IRIS_313-11844	NA	C	NA	NA	C	NA	NA	G	NA	C	NA	NA	G	NA	A	PUEY TAW::IRGC 71405-1::[IRIS 313-11844]	IRIS 313-11844	IRGC 127745	ind3	74	C	T	C	C	C	C	C	C	C	T	C	-	-	-	-	C	-	G	C	T	T	-	A	-	G	G	C	T	C
B141	NA	T	NA	NA	NA	NA	NA	G	NA	C	NA	NA	G	NA	A	GENG 7623::[B141]	B141		admix	90.5
B017	NA	NA	NA	NA	NA	NA	NA	G	NA	C	NA	NA	G	NA	A	AERJITUO::[B017]	B017	IRGC 135822	temp	103																C	-	G	C	T
B167	NA	NA	NA	NA	NA	NA	NA	G	NA	C	NA	NA	G	NA	A	QINGJINZAOSHENG::[B167]	B167	IRGC 136029	temp	116
CX227	NA	NA	NA	NA	NA	NA	NA	G	NA	C	NA	NA	G	NA	A	KASALATH::[CX227]	CX227	IRGC 117617	aus	10.5	C	T	T	-	-	-	C	C	C	T	C	-	-	-	-	C	-	G	C	T	T	-	A	-	G	G	C	T
IRIS_313-10007	NA	NA	NA	NA	NA	NA	NA	G	NA	C	NA	NA	G	NA	A	GARURA::IRGC 64111-1::[IRIS 313-10007]	IRIS 313-10007	IRGC 125749	indx	108
IRIS_313-11151	NA	NA	NA	NA	NA	NA	NA	G	NA	C	NA	NA	G	NA	A	E 21::IRGC 33929-2::[IRIS 313-11151]	IRIS 313-11151	IRGC 128035	ind3	127.5
IRIS_313-11157	NA	NA	NA	NA	NA	NA	NA	G	NA	C	NA	NA	G	NA	A	T KAUG PAO::IRGC 34182-1::[IRIS 313-11157]	IRIS 313-11157	IRGC 127863	ind1A	3	C	T	T	-	-	-	C	C	C	T	C	-	-	-	-	C	-	G	C	T	T	-	A	-	G	G	C	T	T
IRIS_313-11198	NA	NA	NA	NA	NA	NA	NA	G	NA	C	NA	NA	G	NA	A	K 78-13::IRGC 36794-2::[IRIS 313-11198]	IRIS 313-11198	IRGC 132425	temp	94.5
IRIS_313-11522	NA	NA	NA	NA	NA	NA	NA	G	NA	C	NA	NA	G	NA	A	XINTUAN HEI GU::IRGC 56159-1::[IRIS 313-11522]	IRIS 313-11522	IRGC 128505	japx	131.5
IRIS_313-12003	NA	NA	NA	NA	NA	NA	NA	G	NA	C	NA	NA	G	NA	A	GYEONGSAN 1::IRGC 79404-1::[IRIS 313-12003]	IRIS 313-12003	IRGC 128305	temp	103.5
IRIS_313-12060	NA	NA	NA	NA	NA	NA	NA	G	NA	C	NA	NA	G	NA	A	LIJIAN 942::IRGC 82399-1::[IRIS 313-12060]	IRIS 313-12060	IRGC 128365	japx	144
IRIS_313-12061	NA	NA	NA	NA	NA	NA	NA	G	NA	C	NA	NA	G	NA	A	YUNLEN 13::IRGC 82402-1::[IRIS 313-12061]	IRIS 313-12061	IRGC 128509	temp	127
IRIS_313-8559	NA	NA	NA	NA	NA	NA	NA	G	NA	C	NA	NA	G	NA	A	KEERIPALA CHILL PADDY::IRGC 49790-1::[IRIS 313-8559]	IRIS 313-8559	IRGC 125615	ind2	4	C	T	T	-	-	-	C	C	C	T	C	-	-	-	-	C	-	G	C	T	T	-	A	-	G	G	C	T	T
IRIS_313-9814	NA	NA	NA	NA	NA	NA	NA	G	NA	C	NA	NA	G	NA	A	AMARELO::IRGC 9389-1::[IRIS 313-9814]	IRIS 313-9814	IRGC 121249	temp	88.5																					T	-	A	-
CX210	NA	C/T	NA	NA	NA	NA	NA	G	NA	C	NA	NA	G	NA	A	QB_604::[CX210]	CX210	IRGC 136028	admix	7	C	T	T	-	-	-	C	C	C	T	C	-	-	-	-	C	-	G	C	T	T	-	A	-	G	G	C	T
CX243	NA	C/T	NA	NA	NA	NA	NA	G	NA	C	NA	NA	G	NA	A	IR47686-6-2-1-1::[CX243]	CX243	IRGC 135922	trop	5.5	C	T	T	-	-	-	C	C	C	T	C	-	-	-	-	C	-	G	C	T	T	-	A	-	G	G	C	T	T
IRIS_313-11628	NA	C/T	NA	NA	NA	NA	NA	G	NA	C	NA	NA	G	NA	A	KARISHNABELI::IRGC 61979-1::[IRIS 313-11628]	IRIS 313-11628	IRGC 127494	admix	10.5	C	T	T	-	-	-	C	C	C	T	C	-	-	-	-	A	A	G	C	T	T	-	A	-	G	G	C	T	T
CX8	NA	C	NA	NA	NA	NA	NA	G	NA	C	NA	NA	G	NA	A	CHENGHUI 448::[CX8]	CX8		indx	0	C	T	T	-	-	-	C	C	C	T	C	-	-	-	-	C	-	G	C	T	T	-	A	-	G	G	C	T	T
IRIS_313-10796	NA	C	NA	NA	NA	NA	NA	G	NA	C	NA	NA	G	NA	A	MOLOG::IRGC 18282-1::[IRIS 313-10796]	IRIS 313-10796	IRGC 128390	trop	10	C	T	T	-	-	-	C	C	C	T	C	-	-	-	-	A	A	G	C	T	T	-	A	-	G	G	C	T	T
IRIS_313-11455	NA	C	NA	NA	NA	NA	NA	G	NA	C	NA	NA	G	NA	A	CIPPI::IRGC 52415-1::[IRIS 313-11455]	IRIS 313-11455	IRGC 128268	aus	12	C	T	T	-	-	-	C	C	C	T	C	-	-	-	-	C	-	G	C	T	T	-	A	-	G	G	C	T	T
IRIS_313-9463	NA	C	NA	NA	NA	NA	NA	G	NA	C	NA	NA	G	NA	A	CI 1600::IRGC 16305-1::[IRIS 313-9463]	IRIS 313-9463	IRGC 125710	temp	0	C	T	T	-	-	-	C	C	C	T	C	-	-	-	-	C	-	G	C	T	T	-	A	-	G	G	C	T	T
IRIS_313-9811	NA	C	NA	NA	NA	NA	NA	G	NA	C	NA	NA	G	NA	A	KOPANCSI KEREK::IRGC 9305-1::[IRIS 313-9811]	IRIS 313-9811	IRGC 125808	temp	0	C	T	T	-	-	-	C	C	C	T	C	-	-	-	-			G	C	T	T	-	A	-	G	G	C	T	T
B006	NA	T	NA	NA	T	NA	NA	G	NA	C	NA	NA	G	NA	A	YIKONG::[B006]	B006	IRGC 136078	indx	6	C	T	T	-	-	-	C	C	C	T	C	-	-	-	-	C	-	G	C	T	T	-	A	-	G	G	C	T	T
IRIS_313-10544	NA	T	NA	NA	T	NA	NA	G	NA	C	NA	NA	G	NA	A	DONGREM::IRGC 6688-1::[IRIS 313-10544]	IRIS 313-10544	IRGC 127340	ind2	10	C	T	T	-	-	-	C	C	C	T	C	-	-	-	-	C	-	G	C	T	T	-	A	-	G	G	C	T	T
IRIS_313-10729	NA	T	NA	NA	T	NA	NA	G	NA	C	NA	NA	G	NA	A	MALOGBANA::IRGC 16086-1::[IRIS 313-10729]	IRIS 313-10729	IRGC 128379	admix	45	C	-	T	-	-	-	C	C	C	T	C	-	-	-	-	C	-	G	C	T	T	-	A	-	G	-	-	-	T
IRIS_313-10833	NA	T	NA	NA	T	NA	NA	G	NA	C	NA	NA	G	NA	A	EDAKKADAN 0-69-27::IRGC 19560-1::[IRIS 313-10833]	IRIS 313-10833	IRGC 127355	ind2	7	C	T	T	-	-	-	C	C	C	T	C	-	-	-	-	C	-	G	C	T	T	-	A	-	G	G	C	T	T
IRIS_313-10912	NA	T	NA	NA	T	NA	NA	G	NA	C	NA	NA	G	NA	A	NEANG SAATH K 45::IRGC 23109-2::[IRIS 313-10912]	IRIS 313-10912		ind3	6	C	T	T	-	-	-	C	C	C	T	C	-	-	-	-	C	-	G	C	T	T	-	A	-	G	G	C	T	T
IRIS_313-11936	NA	T	NA	NA	T	NA	NA	G	NA	C	NA	NA	G	NA	A	NEANG MINH TONN::IRGC 75366-2::[IRIS 313-11936]	IRIS 313-11936		ind3	4	C	T	T	-	-	-	C	C	C	T	C	-	-	-	-	C	-	G	C	T	T	-	A	-	G	G	C	T	T
IRIS_313-7778	NA	T	NA	NA	T	NA	NA	G	NA	C	NA	NA	G	NA	C	SOM CAU 70 A::IRGC 8227-C1::[IRIS 313-7778]	IRIS 313-7778	IRGC 122254	indx	6	C	T	T	-	-	-	C	C	C	T	C	-	-	-	-	C	-	G	C	T	T	-	A	-	G	G	C	T	T
IRIS_313-8409	NA	T	NA	NA	T	NA	NA	G	NA	C	NA	NA	G	NA	A	SOM NGHE AN::IRGC 60751-1::[IRIS 313-8409]	IRIS 313-8409	IRGC 126007	indx	4	C	T	T	-	-	-	C	C	C	T	C	-	-	-	-	C	-	G	C	T	T	-	A	-	G	G	C	T	T
IRIS_313-8631	NA	T	NA	NA	T	NA	NA	G	NA	C	NA	NA	G	NA	A	DUDRE::IRGC 52523-1::[IRIS 313-8631]	IRIS 313-8631	IRGC 125608	ind2	9	C	T	T	-	-	-	C	C	C	T	C	-	-	-	-	C	-	G	C	T	T	-	A	-	G	G	C	T	T
B011	NA	NA	NA	NA	T	NA	NA	G	NA	C	NA	NA	G	NA	A	CO 22::[B011]	B011	IRGC 135870	indx	16	C	T	T	-	-	-	C	C	C	T	C	-	-	-	-	C	-	G	C	T	T	-	A	-	G	G	C	T	T
B012	NA	NA	NA	NA	T	NA	NA	G	NA	C	NA	NA	G	NA	A	2037(RAJAHAMSAL)::[B012]	B012	IRGC 135815	ind2	22	C	T	T	-	-	-	C	C	C	T	C	-	-	-	-	A	A	G	C	T	T	-	A	-	G	G	C	T	T
B013	NA	NA	NA	NA	T	NA	NA	G	NA	C	NA	NA	G	NA	A	SRI LANKA 1::[B013]	B013	IRGC 136049	indx	10	C	T	T	-	-	-	C	C	C	T	C	-	-	-	-	A	A	G	C	T	T	-	A	-	G	G	C	T	T
B015	NA	NA	NA	NA	T	NA	NA	G	NA	C	NA	NA	G	NA	A	KAHAMU::[B015]	B015	IRGC 135963	ind1A	13	C	T	T	-	-	-	C	C	C	T	C	-	-	-	-	C	-	G	C	T	T	-	A	-	G	G	C	T	T
B026	NA	NA	NA	NA	T	NA	NA	G	NA	C	NA	NA	G	NA	A	PADI LADANG ASE POLO KOMEK::[B026]	B026	IRGC 136017	indx	16	C	T	T	-	-	-	C	C	C	T	C	-	-	-	-	C	-	G	C	T	T	-	A	-	G	G	C	T	T
B040	NA	NA	NA	NA	T	NA	NA	G	NA	C	NA	NA	G	NA	A	K 24::[B040]	B040	IRGC 135962	indx	13	C	T	T	-	-	-	C	C	C	T	C	-	-	-	-	C	-	G	C	T	T	-	A	-	G	G	C	T	T
B051	NA	NA	NA	NA	T	NA	NA	G	NA	C	NA	NA	G	NA	A	GZ 1368-5-4::[B051]	B051	IRGC 135899	indx	13	C	T	T	-	-	-	C	C	C	T	C	-	-	-	-	C	-	G	C	T	T	-	A	-	G	G	C	T	T
B060	NA	NA	NA	NA	T	NA	NA	G	NA	C	NA	NA	G	NA	A	AIJIAONANTE::[B060]	B060	IRGC 117600	ind1A	5	C	T	T	-	-	-	C	C	C	T	C	-	-	-	-	C	-	G	C	T	T	-	A	-	G	G	C	T	T
B061	NA	NA	NA	NA	T	NA	NA	G	NA	C	NA	NA	G	NA	A	GUANGLUAI 4::[B061]	B061		ind1A	5	C	T	T	-	-	-	C	C	C	T	C	-	-	-	-	C	-	G	C	T	T	-	A	-	G	G	C	T	T
B062	NA	NA	NA	NA	T	NA	NA	G	NA	C	NA	NA	G	NA	A	NANTEHAO::[B062]	B062		ind1A	11	C	T	T	-	-	-	C	C	C	T	C	-	-	-	-	C	-	G	C	T	T	-	A	-	G	G	C	T	T
B091	NA	NA	NA	NA	T	NA	NA	G	NA	C	NA	NA	G	NA	C	XIAOHONGGU::[B091]	B091		indx	18	C	T	T	-	-	-	C	C	C	T	C	-	-	-	-	A	A	G	C	T	T	-	A	-	G	G	C	T	T
B124	NA	NA	NA	NA	T	NA	NA	G	NA	C	NA	NA	G	NA	A	GENG 87-304::[B124]	B124		temp	1.5	C	T	T	-	-	-	C	C	C	T	C	-	-	-	-	C	-	G	C	T	T	-	A	-	G	G	C	T	T
B143	NA	NA	NA	NA	T	NA	NA	G	NA	C	NA	NA	G	NA	A	76--1::[B143]	B143		temp	0	C	T	T	-	-	-	C	C	C	T	C	-	-	-	-	C	-	G	C	T	T	-	A	-	G	G	C	T	T
B176	NA	NA	NA	NA	T	NA	NA	G	NA	C	NA	NA	G	NA	A	BRC 25-146-2-1::[B176]	B176	IRGC 135850	indx	0	C	T	T	-	-	-	C	C	C	T	C	-	-	-	-	C	-	G	C	T	T	-	A	-	G	G	C	T	T
B187	NA	NA	NA	NA	T	NA	NA	G	NA	C	NA	NA	G	NA	A	RP 1570-44-1::[B187]	B187	IRGC 136035	indx	0	C	T	T	-	-	-	C	C	C	T	C	-	-	-	-	C	-	G	C	T	T	-	A	-	G	G	C	T	T
B207	NA	NA	NA	NA	T	NA	NA	G	NA	C	NA	NA	G	NA	A	AIHECHI::[B207]	B207		indx	6	C	T	T	-	-	-	C	C	C	T	C	-	-	-	-	C	-	G	C	T	T	-	A	-	G	G	C	T	T
B214	NA	NA	NA	NA	T	NA	NA	G	NA	C	NA	NA	G	NA	A	XUANENCHANGTANQINGZHAN::[B214]	B214		ind1B	13	C	T	T	-	-	-	C	C	C	T	C	-	-	-	-	C	-	G	C	T	T	-	A	-	G	G	C	T	T
B216	NA	NA	NA	NA	T	NA	NA	G	NA	C	NA	NA	G	NA	A	HANMADAO4::[B216]	B216		ind1A	12			T	-	-	-	C	C	C	T	C	-	-	-	-	C	-	G	C	T	T	-	A	-	G	G	C	T	T
B229	NA	NA	NA	NA	T	NA	NA	G	NA	C	NA	NA	G	NA	A	MENJIADING 2::[B229]	B229		indx	24	C	T	T	-	-	-	C	C	C	T	C	-	-	-	-	A	A	G	C	T	T	-	A	-	G	G	C	T	T
B239	NA	NA	NA	NA	T	NA	NA	G	NA	C	NA	NA	G	NA	A	ZHENDAO 232::[B239]	B239	IRGC 136091	ind1A	0	C	T	T	-	-	-	C	C	C	T	C	-	-	-	-	C	-	G	C	T	T	-	A	-	G	G	C	T	T
B255	NA	NA	NA	NA	T	NA	NA	G	NA	C	NA	NA	G	NA	A	DIANRUI 409B::[B255]	B255		indx	8	C	T	T	-	-	-	C	C	C	T	C	-	-	-	-	A	A	G	C	T	T	-	A	-					T
CX103	NA	NA	NA	NA	T	NA	NA	G	NA	C	NA	NA	G	NA	A	RUBIO::[CX103]	CX103	IRGC 136036	admix	13	C	T	T	-	-	-	C	C	C	T	C	-	-	-	-	A	A	G	C	T	T	-	A	-	G	G	C	T	T
CX114	NA	NA	NA	NA	T	NA	NA	G	NA	C	NA	NA	G	NA	A	GUANG LU AI 4::[CX114]	CX114		ind1A	5	C	T	T	-	-	-	C	C	C	T	C	-	-	-	-	C	-	G	C	T	T	-	A	-	G	G	C	T	T
CX123	NA	NA	NA	NA	T	NA	NA	G	NA	C	NA	NA	G	NA	A	YU QIU GU::[CX123]	CX123		ind1A	16	C	T	T	-	-	-	C	C	C	T	C	-	-	-	-	A	A	G	C	T	T	-	A	-	G	G	C	T	T
CX128	NA	NA	NA	NA	T	NA	NA	G	NA	C	NA	NA	G	NA	A	GAJALE::[CX128]	CX128	IRGC 135889	indx	4	C	T	T	-	-	-	C	C	C	T	C	-	-	-	-	C	-	G	C	T	T	-	A	-	G	G	C	T	T
CX138	NA	NA	NA	NA	T	NA	NA	G	NA	C	NA	NA	G	NA	A	QD_441::[CX138]	CX138		japx	1	C	T	T	-	-	-	C	C	C	T	C	-	-	-	-	C	-	G	C	T	T	-	A	-	G	G	C	T	T
CX146	NA	NA	NA	NA	T	NA	NA	G	NA	C	NA	NA	G	NA	A	CO43::[CX146]	CX146	IRGC 135871	indx	13	C	T	T	-	-	-	C	C	C	T	C	-	-	-	-	A	A	G	C	T	T	-	A	-	G	G	C	T	T
CX162	NA	NA	NA	NA	T	NA	NA	G	NA	C	NA	NA	G	NA	A	TN1::[CX162]	CX162		ind1A	13	C	T	T	-	-	-	C	C	C	T	C	-	-	-	-	C	-	G	C	T	T	-	A	-	G	G	C	T	T
CX2	NA	NA	NA	NA	T	NA	NA	G	NA	C	NA	NA	G	NA	A	BR11::[CX2]	CX2	IRGC 135847	indx	5	C	T	T	-	-	-	C	C	C	T	C	-	-	-	-	C	-	G	C	T	T	-	A	-	G	G	C	T	T
CX206	NA	NA	NA	NA	T	NA	NA	G	NA	C	NA	NA	G	NA	A	IR2061-522-6-9::[CX206]	CX206	IRGC 135918	ind1B	15	C	T	T	-	-	-	C	C	C	T	C	-	-	-	-	C	-	G	C	T	T	-	A	-	G	G	C	T	T
CX219	NA	NA	NA	NA	T	NA	NA	G	NA	C	NA	NA	G	NA	A	FL478::[CX219]	CX219	IRGC 135888	indx	14	C	T	T	-	-	-	C	C	C	T	C	-	-	-	-	C	-	G	C	T	T	-	A	-	G	G	C	T	T
CX237	NA	NA	NA	NA	T	NA	NA	G	NA	C	NA	NA	G	NA	A	B6136-3-TB-0-1-5::[CX237]	CX237	IRGC 135834	ind1B	13	C	T	T	-	-	-	C	C	C	T	C	-	-	-	-	C	-	G	C	T	T	-	A	-	G	G	C	T	T
CX267	NA	NA	NA	NA	T	NA	NA	G	NA	C	NA	NA	G	NA	A	IET1444::[CX267]	CX267	IRGC 135914	indx	12	C	T	T	-	-	-	C	C	C	T	C	-	-	-	-	C	-	G	C	T	T	-	A	-	G	G	C	T	T
CX276	NA	NA	NA	NA	T	NA	NA	G	NA	C	NA	NA	G	NA	A	IR8192-200-3-3-1-1::[CX276]	CX276	IRGC 135939	ind1B	16	C	T	T	-	-	-	C	C	C	T	C	-	-	-	-	C	-	G	C	T	T	-	A	-	G	G	C	T	T
CX277	NA	NA	NA	NA	T	NA	NA	G	NA	C	NA	NA	G	NA	A	02428-IL::[CX277]	CX277	IRGC 135810	japx	1	C	T	T	-	-	-	C	C	C	T	C	-	-	-	-	C	-	G	C	T	T	-	A	-	G	G	C	T	T
CX288	NA	NA	NA	NA	T	NA	NA	G	NA	C	NA	NA	G	NA	A	D11::[CX288]	CX288	IRGC 135874	indx	5	C	T	T	-	-	-	C	C	C	T	C	-	-	-	-	C	-	G	C	T	T	-	A	-	G	G	C	T	T
CX290	NA	NA	NA	NA	T	NA	NA	G	NA	C	NA	NA	G	NA	A	DUO 57::[CX290]	CX290		ind1B	1	C	T	T	-	-	-	C	C	C	T	C	-	-	-	-	C	-	G	C	T	T	-	A	-	G	G	C	T	T
CX328	NA	NA	NA	NA	T	NA	NA	G	NA	C	NA	NA	G	NA	A	BAOXUAN 21 B::[CX328]	CX328		ind1A	12	C	T	T	-	-	-	C	C	C	T	C	-	-	-	-	C	-	G	C	T	T	-	A	-	G	G	C	T	T
CX351	NA	NA	NA	NA	T	NA	NA	G	NA	C	NA	NA	G	NA	A	053A-3::[CX351]	CX351	IRGC 135811	temp	1	C	T	T	-	-	-	C	C	C	T	C	-	-	-	-	C	-	G	C	T	T	-	A	-	G	G	C	T	T
CX94	NA	NA	NA	NA	T	NA	NA	G	NA	C	NA	NA	G	NA	A	SWARNA::[CX94]	CX94	IRGC 117278	indx	13	C	T	T	-	-	-	C	C	C	T	C	-	-	-	-	C	-	G	C	T	T	-	A	-	G	G	C	T	T
CX98	NA	NA	NA	NA	T	NA	NA	G	NA	C	NA	NA	G	NA	A	DODDABYRANELLA::[CX98]	CX98	IRGC 135882	ind2	24	C	T	T	-	-	-	C	C	C	T	C	-	-	-	-	A	A	G	C	T	T	-	A	-	G	G	C	T	T
IRIS_313-10026	NA	NA	NA	NA	T	NA	NA	G	NA	C	NA	NA	G	NA	A	KITRANA 1007::IRGC 68517-1::[IRIS 313-10026]	IRIS 313-10026	IRGC 125804	ind2	24	C	T	T	-	-	-	C	C	C	T	C	-	-	-	-	A	A	G	C	T	T	-	A	-	G	G	C	T	T
IRIS_313-10035	NA	NA	NA	NA	T	NA	NA	G	NA	C	NA	NA	G	NA	A	RIZ TYPE SORGHO::IRGC 69015-1::[IRIS 313-10035]	IRIS 313-10035	IRGC 125887	ind2	0	C	T	T	-	-	-	C	C	C	T	C	-	-	-	-	C	-	G	C	T	T	-	A	-	G	G	C	T	T
IRIS_313-10129	NA	NA	NA	NA	T	NA	NA	G	NA	C	NA	NA	G	NA	A	SAN SHIH TSI::IRGC 1038-1::[IRIS 313-10129]	IRIS 313-10129	IRGC 125897	ind1A	15	C	T	T	-	-	-	C	C	C	T	C	-	-	-	-	A	A	G	C	T	T	-	A	-	G	G	C	T	T
IRIS_313-10148	NA	NA	NA	NA	T	NA	NA	G	NA	C	NA	NA	G	NA	A	CAUVERY::IRGC 45255-1::[IRIS 313-10148]	IRIS 313-10148	IRGC 125695	indx	4	C	T	T	-	-	-	C	C	C	T	C	-	-	-	-	C	-	G	C	T	T	-	A	-	G	G	C	T	T
IRIS_313-10150	NA	NA	NA	NA	T	NA	NA	G	NA	C	NA	NA	G	NA	A	N 22::IRGC 46459-1::[IRIS 313-10150]	IRIS 313-10150	IRGC 126249	aus	3	C	T	T	-	-	-	C	C	C	T	C	-	-	-	-	C	-	G	C	T	T	-	A	-	G	G	C	T	T
IRIS_313-10170	NA	NA	NA	NA	T	NA	NA	G	NA	C	NA	NA	G	NA	A	MIN ZAO 6::IRGC 63772-1::[IRIS 313-10170]	IRIS 313-10170	IRGC 125842	ind1A	4	C	T	T	-	-	-	C	C	C	T	C	-	-	-	-	C	-	G	C	T	T	-	A	-	G	G	C	T	T
IRIS_313-10476	NA	NA	NA	NA	T	NA	NA	G	NA	C	NA	NA	G	NA	C	PACHCHAIPERUMAL 2462-11::IRGC 3474-1::[IRIS 313-10476]	IRIS 313-10476	IRGC 127698	ind2	14	C	T	T	-	-	-	C	C	C	T	C	-	-	-	-	C	-	G	C	T	T	-	A	-	G	G	C	T	T
IRIS_313-10484	NA	NA	NA	NA	T	NA	NA	G	NA	C	NA	NA	G	NA	A	PILIT (7480) SELN (CI 12007)::IRGC 3758-1::[IRIS 313-10484]	IRIS 313-10484	IRGC 127729	ind1A	0	C	T	T	-	-	-	C	C	C	T	C	-	-	-	-	C	-	G	C	T	T	-	A	-	G	G	C	T	T
IRIS_313-10509	NA	NA	NA	NA	T	NA	NA	G	NA	C	NA	NA	G	NA	A	AMBARIKORI::IRGC 5132-1::[IRIS 313-10509]	IRIS 313-10509	IRGC 127120	ind3	18	C	T	T	-	-	-	C	C	C	T	C	-	-	-	-	A	A	G	C	T	T	-	A	-	G	G	C	T	T
IRIS_313-10527	NA	NA	NA	NA	T	NA	NA	G	NA	C	NA	NA	G	NA	A	ADT 12::IRGC 6254-1::[IRIS 313-10527]	IRIS 313-10527	IRGC 127107	ind2	17	C	T	T	-	-	-	C	C	C	T	C	-	-	-	-	C	-	G	C	T	T	-	A	-	G	G	C	T	T
IRIS_313-10560	NA	NA	NA	NA	T	NA	NA	G	NA	C	NA	NA	G	NA	A	TA PAI MAUNG::IRGC 7292-1::[IRIS 313-10560]	IRIS 313-10560	IRGC 127848	ind1A	4	C	T	T	-	-	-	C	C	C	T	C	-	-	-	-	C	-	G	C	T	T	-	A	-	G	G	C	T	T
IRIS_313-10583	NA	NA	NA	NA	T	NA	NA	G	NA	C	NA	NA	G	NA	A	TSAO SIAO PEH TAO::IRGC 8265-2::[IRIS 313-10583]	IRIS 313-10583	IRGC 128194	temp	0	C	T	T	-	-	-	C	C	C	T	C	-	-	-	-	C	-	G	C	T	T	-	A	-	G	G	C	T	T
IRIS_313-10602	NA	NA	NA	NA	T	NA	NA	G	NA	C	NA	NA	G	NA	A	DM 49::IRGC 8775-1::[IRIS 313-10602]	IRIS 313-10602	IRGC 127329	aus	6	C	T	T	-	-	-	C	C	C	T	C	-	-	-	-	C	-	G	C	T	T	-	A	-	G	G	C	T	T
IRIS_313-10614	NA	NA	NA	NA	T	NA	NA	G	NA	C	NA	NA	G	NA	A	HAM MOON::IRGC 9135-2::[IRIS 313-10614]	IRIS 313-10614	IRGC 128049	indx	4	C	T	T	-	-	-	C	C	C	T	C	-	-	-	-	C	-	G	C	T	T	-	A	-	G	G	C	T	T
IRIS_313-10623	NA	NA	NA	NA	T	NA	NA	G	NA	C	NA	NA	G	NA	A	SIDALI::IRGC 9567-1::[IRIS 313-10623]	IRIS 313-10623	IRGC 127804	aus	4	C	T	T	-	-	-	C	C	C	T	C	-	-	-	-	C	-	G	C	T	T	-	A	-	G	G	C	T	T
IRIS_313-10650	NA	NA	NA	NA	T	NA	NA	G	NA	C	NA	NA	G	NA	A	NAHNG PRAYAH 132::IRGC 11470-1::[IRIS 313-10650]	IRIS 313-10650		ind3	18	C	T	T	-	-	-	C	C	C	T	C	-	-	-	-	A	A	G	C	T	T	-	A	-	G	G	C	T	T
IRIS_313-10662	NA	NA	NA	NA	T	NA	NA	G	NA	C	NA	NA	G	NA	A	KAHATAWEE::IRGC 12004-1::[IRIS 313-10662]	IRIS 313-10662	IRGC 127476	ind2	5	C	T	T	-	-	-	C	C	C	T	C	-	-	-	-	C	-	G	C	T	T	-	A	-	G	G	C	T	T
IRIS_313-10694	NA	NA	NA	NA	T	NA	NA	G	NA	C	NA	NA	G	NA	A	HAJI HARUN 38::IRGC 13827-2::[IRIS 313-10694]	IRIS 313-10694	IRGC 128047	ind3	2	C	T	T	-	-	-	C	C	C	T	C	-	-	-	-	C	-	G	C	T	T	-	A	-	G	G	C	T	T
IRIS_313-10701	NA	NA	NA	NA	T	NA	NA	G	NA	C	NA	NA	G	NA	A	RADIN EBOS 35::IRGC 14204-1::[IRIS 313-10701]	IRIS 313-10701		ind3	5	C	T	T	-	-	-	C	C	C	T	C	-	-	-	-	C	-	G	C	T	T	-	A	-	G	G	C	T	T
IRIS_313-10707	NA	NA	NA	NA	T	NA	NA	G	NA	C	NA	NA	G	NA	A	ANAK DIDEK::IRGC 14491-1::[IRIS 313-10707]	IRIS 313-10707		ind3	16	C	T	T	-	-	-	C	C	C	T	C	-	-	-	-	A	A	G	C	T	T	-	A	-	G	G	C	T	T
IRIS_313-10711	NA	NA	NA	NA	T	NA	NA	G	NA	C	NA	NA	G	NA	A	7 AC::IRGC 14860-2::[IRIS 313-10711]	IRIS 313-10711	IRGC 132314	trop	1	C	T	T	-	-	-	C	C	C	T	C	-	-	-	-	C	-	G	C	T	T	-	A	-	G	G	C	T	T
IRIS_313-10719	NA	NA	NA	NA	T	NA	NA	G	NA	C	NA	NA	G	NA	A	VELLAI KOLOMBAN::IRGC 15517-1::[IRIS 313-10719]	IRIS 313-10719	IRGC 127886	ind2	17	C	T	T	-	-	-	C	C	C	T	C	-	-	-	-	C	-	G	C	T	T	-	A	-	G	G	C	T	T
IRIS_313-10735	NA	NA	NA	NA	T	NA	NA	G	NA	C	NA	NA	G	NA	A	LAL SAR::IRGC 16185-1::[IRIS 313-10735]	IRIS 313-10735	IRGC 127546	aus	6	C	T	T	-	-	-	C	C	C	T	C	-	-	-	-	C	-	G	C	T	T	-	A	-	G	G	C	T	T
IRIS_313-10757	NA	NA	NA	NA	T	NA	NA	G	NA	C	NA	NA	G	NA	A	PEUAK NAM 43::IRGC 17129-1::[IRIS 313-10757]	IRIS 313-10757		ind3	15	C	T	T	-	-	-	C	C	C	T	C	-	-	-	-	A	A	G	C	T	T	-	A	-	G	G	C	T	T
IRIS_313-10851	NA	NA	NA	NA	T	NA	NA	G	NA	C	NA	NA	G	NA	A	ARC 7296::IRGC 20585-1::[IRIS 313-10851]	IRIS 313-10851	IRGC 132387	aro	29	C	T	T	-	-	-	C	C	C	T	C	-	-	-	-	A	A	G	C	T	T	-	A	-	G	G	C	T	T
IRIS_313-10856	NA	NA	NA	NA	T	NA	NA	G	NA	C	NA	NA	G	NA	A/C	ARC 10537::IRGC 20981-1::[IRIS 313-10856]	IRIS 313-10856	IRGC 128220	admix	13	C	T	T	-	-	-	C	C	C	T	C	-	-	-	-	C	-	G	C	T	T	-	A	-	G	G	C	T	T
IRIS_313-10891	NA	NA	NA	NA	T	NA	NA	G	NA	C	NA	NA	G	NA	A	ARC 12867::IRGC 22401-1::[IRIS 313-10891]	IRIS 313-10891	IRGC 127148	aus	25	C	T	T	-	-	-	C	C	C	T	C	-	-	-	-	A	A	G	C	T	T	-	A	-	G	G	C	T	T
IRIS_313-10904	NA	NA	NA	NA	T	NA	NA	G	NA	C	NA	NA	G	NA	A	KREM KRAHAM::IRGC 22981-2::[IRIS 313-10904]	IRIS 313-10904	IRGC 128091	ind3	13	C	T	T	-	-	-	C	C	C	T	C	-	-	-	-	C	-	G	C	T	T	-	A	-	G	G	C	T	T
IRIS_313-10921	NA	NA	NA	NA	T	NA	NA	G	NA	C	NA	NA	G	NA	A	KHAO PHAE HOM::IRGC 23518-2::[IRIS 313-10921]	IRIS 313-10921	IRGC 132427	indx	4	C	T	T	-	-	-	C	C	C	T	C	-	-	-	-	C	-	G	C	T	T	-	A	-	G	G	C	T	T
IRIS_313-10927	NA	NA	NA	NA	T	NA	NA	G	NA	C	NA	NA	G	NA	A	SUGA PANKHA::IRGC 24054-1::[IRIS 313-10927]	IRIS 313-10927	IRGC 127828	aus	7	C	T	T	-	-	-	C	C	C	T	C	-	-	-	-	C	-	G	C	T	T	-	A	-	G	G	C	T	T
IRIS_313-10979	NA	NA	NA	NA	T	NA	NA	G	NA	C	NA	NA	G	NA	A	BORA DIGA::IRGC 26439-1::[IRIS 313-10979]	IRIS 313-10979		aus	6	C	T	T	-	-	-	C	C	C	T	C	-	-	-	-	C	-	G	C	T	T	-	A	-	G	G	C	T	T
IRIS_313-10981	NA	NA	NA	NA	T	NA	NA	G	NA	C	NA	NA	G	NA	A	JHUL DIGA::IRGC 26478-1::[IRIS 313-10981]	IRIS 313-10981	IRGC 127456	aus	5	C	T	T	-	-	-	C	C	C	T	C	-	-	-	-	C	-	G	C	T	T	-	A	-	G	G	C	T	T
IRIS_313-10998	NA	NA	NA	NA	T	NA	NA	G	NA	C	NA	NA	G	NA	A	KETAN RASO::IRGC 27154-1::[IRIS 313-10998]	IRIS 313-10998		indx	5	C	T	T	-	-	-	C	C	C	T	C	-	-	-	-	C	-	G	C	T	T	-	A	-	G	G	C	T	T
IRIS_313-11016	NA	NA	NA	NA	T	NA	NA	G	NA	C	NA	NA	G	NA	A	KACHILON::IRGC 27555-1::[IRIS 313-11016]	IRIS 313-11016	IRGC 128328	aus	14	C	T	T	-	-	-	C	C	C	T	C	-	-	-	-	C	-	G	C	T	T	-	A	-	G	G	C	T	T
IRIS_313-11019	NA	NA	NA	NA	T	NA	NA	G	NA	C	NA	NA	G	NA	A	PORANG::IRGC 27577-1::[IRIS 313-11019]	IRIS 313-11019	IRGC 128436	aus	3	C	T	T	-	-	-	C	C	C	T	C	-	-	-	-	C	-	G	C	T	T	-	A	-	G	G	C	T	T
IRIS_313-11024	NA	NA	NA	NA	T	NA	NA	G	NA	C	NA	NA	G	NA	A	BEGMI 135::IRGC 27845-1::[IRIS 313-11024]	IRIS 313-11024	IRGC 127217	aus	5	C	T	T	-	-	-	C	C	C	T	C	-	-	-	-	C	-	G	C	T	T	-	A	-	G	G	C	T	T
IRIS_313-11025	NA	NA	NA	NA	T	NA	NA	G	NA	C	NA	NA	G	NA	A	DHAN 263::IRGC 27926-2::[IRIS 313-11025]	IRIS 313-11025	IRGC 128030	aus	4	C	T	T	-	-	-	C	C	C	T	C	-	-	-	-	C	-	G	C	T	T	-	A	-	G	G	C	T	T
IRIS_313-11029	NA	NA	NA	NA	T	NA	NA	G	NA	C	NA	NA	G	NA	A	MUSHKAN 340 A::IRGC 28073-1::[IRIS 313-11029]	IRIS 313-11029	IRGC 127641	aus	5	C	T	T	-	-	-	C	C	C	T	C	-	-	-	-	C	-	G	C	T	T	-	A	-	G	G	C	T	T
IRIS_313-11052	NA	NA	NA	NA	T	NA	NA	G	NA	C	NA	NA	G	NA	A	AUS 278::IRGC 29068-1::[IRIS 313-11052]	IRIS 313-11052	IRGC 127182	aus	14	C	T	T	-	-	-	C	C	C	T	C	-	-	-	-	C	-	G	C	T	T	-	A	-	G	G	C	T	T
IRIS_313-11053	NA	NA	NA	NA	T	NA	NA	G	NA	C	NA	NA	G	NA	A	AUS 282::IRGC 29072-1::[IRIS 313-11053]	IRIS 313-11053	IRGC 127183	aus	14	C	T	T	-	-	-	C	C	C	T	C	-	-	-	-	C	-	G	C	T	T	-	A	-	G	G	C	T	T
IRIS_313-11059	NA	NA	NA	NA	T	NA	NA	G	NA	C	NA	NA	G	NA	A	AUS 344::IRGC 29131-1::[IRIS 313-11059]	IRIS 313-11059	IRGC 127189	aus	6	C	T	T	-	-	-	C	C	C	T	C	-	-	-	-	C	-	G	C	T	T	-	A	-	G	G	C	T	T
IRIS_313-11064	NA	NA	NA	NA	T	NA	NA	G	NA	C	NA	NA	G	NA	A	BORO 275::IRGC 29294-2::[IRIS 313-11064]	IRIS 313-11064	IRGC 132306	aus	7	C	T	T	-	-	-	C	C	C	T	C	-	-	-	-	C	-	G	C	T	T	-	A	-	G	G	C	T	T
IRIS_313-11067	NA	NA	NA	NA	T	NA	NA	G	NA	C	NA	NA	G	NA	A	KALIBORO 600::IRGC 29367-1::[IRIS 313-11067]	IRIS 313-11067	IRGC 127481	aus	7	C	T	T	-	-	-	C	C	C	T	C	-	-	-	-	C	-	G	C	T	T	-	A	-	G	G	C	T	T
IRIS_313-11121	NA	NA	NA	NA	T	NA	NA	G	NA	C	NA	NA	G	NA	A	GBRA::IRGC 32474-2::[IRIS 313-11121]	IRIS 313-11121	IRGC 132249	trop	4	C	T	T	-	-	-	C	C	C	T	C	-	-	-	-			G	C	T	T	-	A	-	G	G	C	T	T
IRIS_313-11126	NA	NA	NA	NA	T	NA	NA	G	NA	C	NA	NA	G	NA	A	ANBAW::IRGC 32932-2::[IRIS 313-11126]	IRIS 313-11126	IRGC 127926	indx	5	C	T	T	-	-	-	C	C	C	T	C	-	-	-	-	C	-	G	C	T	T	-	A	-	G	G	C	T	T
IRIS_313-11129	NA	NA	NA	NA	T	NA	NA	G	NA	C	NA	NA	G	NA	A	HAORU::IRGC 33090-2::[IRIS 313-11129]	IRIS 313-11129	IRGC 128051	indx	0	C	T	T	-	-	-	C	C	C	T	C	-	-	-	-	C	-	G	C	T	T	-	A	-	G	G	C	T	T
IRIS_313-11158	NA	NA	NA	NA	T	NA	NA	G	NA	C	NA	NA	G	NA	A	NAN ERH AI 5::IRGC 34255-1::[IRIS 313-11158]	IRIS 313-11158	IRGC 127644	ind1A	4	C	T	T	-	-	-	C	C	C	T	C	-	-	-	-	C	-	G	C	T	T	-	A	-	G	G	C	T	T
IRIS_313-11166	NA	NA	NA	NA	T	NA	NA	G	NA	C	NA	NA	G	NA	A	BHUT MURI::IRGC 34861-1::[IRIS 313-11166]	IRIS 313-11166	IRGC 127224	aus	3	C	T	T	-	-	-	C	C	C	T	C	-	-	-	-	C	-	G	C	T	T	-	A	-	G	G	C	T	T
IRIS_313-11169	NA	NA	NA	NA	T	NA	NA	G	NA	C	NA	NA	G	NA	A	KANAI BASHI::IRGC 34967-1::[IRIS 313-11169]	IRIS 313-11169	IRGC 131997	aus	2	C	T	T	-	-	-	C	C	C	T	C	-	-	-	-	C	-	G	C	T	T	-	A	-	G	G	C	T	T
IRIS_313-11194	NA	NA	NA	NA	T	NA	NA	G	NA	C	NA	NA	G	NA	A	KHAO PAH 8-5-38::IRGC 36587-1::[IRIS 313-11194]	IRIS 313-11194	IRGC 135760	ind3	18	C	T	T	-	-	-	C	C	C	T	C	-	-	-	-	A	A	G	C	T	T	-	A	-	G	G	C	T	T
IRIS_313-11210	NA	NA	NA	NA	T	NA	NA	G	NA	C	NA	NA	G	NA	A	ZARBASAIL::IRGC 37346-1::[IRIS 313-11210]	IRIS 313-11210	IRGC 127911	aus	5	C	T	T	-	-	-	C	C	C	T	C	-	-	-	-	C	-	G	C	T	T	-	A	-	G	G	C	T	T
IRIS_313-11244	NA	NA	NA	NA	T	NA	NA	G	NA	C	NA	NA	G	NA	A	W 1014-162::IRGC 39871-1::[IRIS 313-11244]	IRIS 313-11244		indx	13	C	T	T	-	-	-	C	C	C	T	C	-	-	-	-	C	-	G	C	T	T	-	A	-	G	G	C	T	T
IRIS_313-11245	NA	NA	NA	NA	T	NA	NA	G	NA	C	NA	NA	G	NA	A	RP 20-12::IRGC 40031-2::[IRIS 313-11245]	IRIS 313-11245	IRGC 128151	indx	13	C	T	T	-	-	-	C	C	C	T	C	-	-	-	-	C	-	G	C	T	T	-	A	-	G	G	C	T	T
IRIS_313-11247	NA	NA	NA	NA	T	NA	NA	G	NA	C	NA	NA	G	NA	A	RP 1153-20-14::IRGC 40131-2::[IRIS 313-11247]	IRIS 313-11247	IRGC 132431	indx	5	C	T	T	-	-	-	C	C	C	T	C	-	-	-	-	C	-	G	C	T	T	-	A	-	G	G	C	T	T
IRIS_313-11265	NA	NA	NA	NA	T	NA	NA	G	NA	C	NA	NA	G	NA	A	ARC 14150::IRGC 41435-2::[IRIS 313-11265]	IRIS 313-11265	IRGC 132242	aus	13	C	T	T	-	-	-	C	C	C	T	C	-	-	-	-	C	-	G	C	T	T	-	A	-	G	G	C	T	T
IRIS_313-11271	NA	NA	NA	NA	T	NA	NA	G	NA	C	NA	NA	G	NA	A	ARC 14737::IRGC 41729-2::[IRIS 313-11271]	IRIS 313-11271	IRGC 127961	ind2	18	C	T	T	-	-	-	C	C	C	T	C	-	-	-	-	A	A	G	C	T	T	-	A	-	G	G	C	T	T
IRIS_313-11291	NA	NA	NA	NA	T	NA	NA	G	NA	C	NA	NA	G	NA	A	ARC 7425::IRGC 42538-1::[IRIS 313-11291]	IRIS 313-11291	IRGC 127170	aus	5	C	T	T	-	-	-	C	C	C	T	C	-	-	-	-	C	-	G	C	T	T	-	A	-	G	G	C	T	T
IRIS_313-11295	NA	NA	NA	NA	T	NA	NA	G	NA	C	NA	NA	G	NA	A	ARC 11397::IRGC 42664-1::[IRIS 313-11295]	IRIS 313-11295	IRGC 127137	admix	24	C	T	T	-	-	-	C	C	C	T	C	-	-	-	-	A	A	G	C	T	T	-	A	-	G	G	C	T	T
IRIS_313-11310	NA	NA	NA	NA	T	NA	NA	G	NA	C	NA	NA	G	NA	A	ARC 15929::IRGC 43269-2::[IRIS 313-11310]	IRIS 313-11310	IRGC 127968	ind2	15	C	T	T	-	-	-	C	C	C	T	C	-	-	-	-	A	A	G	C	T	T	-	A	-	G	G	C	T	T
IRIS_313-11318	NA	NA	NA	NA	T	NA	NA	G	NA	C	NA	NA	G	NA	A	TUBU::IRGC 43677-2::[IRIS 313-11318]	IRIS 313-11318	IRGC 128195	ind3	15	C	T	T	-	-	-	C	C	C	T	C	-	-	-	-	A	A	G	C	T	T	-	A	-	G	G	C	T	T
IRIS_313-11323	NA	NA	NA	NA	T	NA	NA	G	NA	C	NA	NA	G	NA	A	JHORA::IRGC 43862-1::[IRIS 313-11323]	IRIS 313-11323	IRGC 127455	aus	2	C	T	T	-	-	-	C	C	C	T	C	-	-	-	-	C	-	G	C	T	T	-	A	-	G	G	C	T	T
IRIS_313-11325	NA	NA	NA	NA	T	NA	NA	G	NA	C	NA	NA	G	NA	A	BLM 70::IRGC 43989-1::[IRIS 313-11325]	IRIS 313-11325	IRGC 135739	indx	7	C	T	T	-	-	-	C	C	C	T	C	-	-	-	-	C	-	G	C	T	T	-	A	-	G	G	C	T	T
IRIS_313-11353	NA	NA	NA	NA	T	NA	NA	G	NA	C	NA	NA	G	NA	A	CHILE BORO::IRGC 45297-2::[IRIS 313-11353]	IRIS 313-11353	IRGC 128013	aus	2	C	T	T	-	-	-	C	C	C	T	C	-	-	-	-	C	-	G	C	T	T	-	A	-	G	G	C	T	T
IRIS_313-11370	NA	NA	NA	NA	T	NA	NA	G	NA	C	NA	NA	G	NA	A	SACHI::IRGC 46612-2::[IRIS 313-11370]	IRIS 313-11370	IRGC 132368	ind2	24	C	T	T	-	-	-	C	C	C	T	C	-	-	-	-	A	A	G	C	T	T	-	A	-	G	G	C	T	T
IRIS_313-11385	NA	NA	NA	NA	T	NA	NA	G	NA	C	NA	NA	G	NA	A	IR 9747 SEL::IRGC 47695-1::[IRIS 313-11385]	IRIS 313-11385	IRGC 127442	indx	4	C	T	T	-	-	-	C	C	C	T	C	-	-	-	-	C	-	G	C	T	T	-	A	-	G	G	C	T	T
IRIS_313-11399	NA	NA	NA	NA	T	NA	NA	G	NA	C	NA	NA	G	NA	A	RAYDHAN 1::IRGC 49127-2::[IRIS 313-11399]	IRIS 313-11399	IRGC 128148	indx	15	C	T	T	-	-	-	C	C	C	T	C	-	-	-	-	C	-	G	C	T	T	-	A	-	G	G	C	T	T
IRIS_313-11408	NA	NA	NA	NA	T	NA	NA	G	NA	C	NA	NA	G	NA	A	CHITRAKALI::IRGC 49524-2::[IRIS 313-11408]	IRIS 313-11408	IRGC 128016	ind2	10	C	T	T	-	-	-	C	C	C	T	C	-	-	-	-	C	-	G	C	T	T	-	A	-	G	G	C	T	T
IRIS_313-11478	NA	NA	NA	NA	T	NA	NA	G	NA	C	NA	NA	G	NA	A	LOCAL::IRGC 53300-1::[IRIS 313-11478]	IRIS 313-11478	IRGC 127572	ind2	18	C	T	T	-	-	-	C	C	C	T	C	-	-	-	-	A	A	G	C	T	T	-	A	-	G	G	C	T	T
IRIS_313-11481	NA	NA	NA	NA	T	NA	NA	G	NA	C	NA	NA	G	NA	A	BINNAFUL::IRGC 53479-1::[IRIS 313-11481]	IRIS 313-11481	IRGC 127228	aus	5	C	T	T	-	-	-	C	C	C	T	C	-	-	-	-	C	-	G	C	T	T	-	A	-	G	G	C	T	T
IRIS_313-11491	NA	NA	NA	NA	T	NA	NA	G	NA	C	NA	NA	G	NA	A	BIR BAHADUR::IRGC 53889-1::[IRIS 313-11491]	IRIS 313-11491	IRGC 127230	ind2	13	C	T	T	-	-	-	C	C	C	T	C	-	-	-	-	A	A	G	C	T	T	-	A	-	G	G	C	T	T
IRIS_313-11544	NA	NA	NA	NA	T	NA	NA	G	NA	C	NA	NA	G	NA	A	LINPAN CHAW::IRGC 58087-1::[IRIS 313-11544]	IRIS 313-11544	IRGC 135570	indx	12	C	T	T	-	-	-	C	C	C	T	C	-	-	-	-	C	-	G	C	T	T	-	A	-	G	G	C	T	T
IRIS_313-11596	NA	NA	NA	NA	T	NA	NA	G	NA	C	NA	NA	G	NA	A	BHAINSA MUNDARIYA::IRGC 60893-1::[IRIS 313-11596]	IRIS 313-11596	IRGC 127221	indx	12	C	T	T	-	-	-	C	C	C	T	C	-	-	-	-	C	-	G	C	T	T	-	A	-	G	G	C	T	T
IRIS_313-11621	NA	NA	NA	NA	T	NA	NA	G	NA	C	NA	NA	G	NA	A	UPRH 265::IRGC 61689-1::[IRIS 313-11621]	IRIS 313-11621	IRGC 127877	indx	15	C	T	T	-	-	-	C	C	C	T	C	-	-	-	-	A	A	G	C	T	T	-	A	-	G	G	C	T	T
IRIS_313-11624	NA	NA	NA	NA	T	NA	NA	G	NA	C	NA	NA	G	NA	A	ANADI WHITE::IRGC 61897-1::[IRIS 313-11624]	IRIS 313-11624	IRGC 127122	ind1A	13	C	T	T	-	-	-	C	C	C	T	C	-	-	-	-	C	-	G	C	T	T	-	A	-	G	G	C	T	T
IRIS_313-11694	NA	NA	NA	NA	T	NA	NA	G	NA	C	NA	NA	G	NA	A	CHING LIU::IRGC 65018-1::[IRIS 313-11694]	IRIS 313-11694	IRGC 127279	indx	7	C	T	T	-	-	-	C	C	C	T	C	-	-	-	-	A	A	G	C	T	T	-	A	-	G	G	C	T	T
IRIS_313-11695	NA	NA	NA	NA	T	NA	NA	G	NA	C	NA	NA	G	NA	A	HSIN-T'AO YUAN CHING YU::IRGC 65074-1::[IRIS 313-11695]	IRIS 313-11695	IRGC 127421	ind1A	4	C	T	T	-	-	-	C	C	C	T	C	-	-	-	-	C	-	G	C	T	T	-	A	-	G	G	C	T	T
IRIS_313-11722	NA	NA	NA	NA	T	NA	NA	G	NA	C	NA	NA	G	NA	A	KABERI::IRGC 66801-1::[IRIS 313-11722]	IRIS 313-11722	IRGC 128327	indx	13	C	T	T	-	-	-	C	C	C	T	C	-	-	-	-	C	-	G	C	T	T	-	A	-	G	G	C	T	T
IRIS_313-11733	NA	NA	NA	NA	T	NA	NA	G	NA	C	NA	NA	G	NA	A	SHUANG BAI AI 2::IRGC 67309-1::[IRIS 313-11733]	IRIS 313-11733	IRGC 127801	ind1A	18	C	T	T	-	-	-	C	C	C	T	C	-	-	-	-	A	A	G	C	T	T	-	A	-	G	G	C	T	T
IRIS_313-11791	NA	NA	NA	NA	T	NA	NA	G	NA	C	NA	NA	G	NA	A	VARY LAHY::IRGC 69908-1::[IRIS 313-11791]	IRIS 313-11791	IRGC 127885	ind2	23	C	T	T	-	-	-	C	C	C	T	C	-	-	-	-	A	A	G	C	T	T	-	A	-	G	G	C	T	T
IRIS_313-11815	NA	NA	NA	NA	T	NA	NA	G	NA	C	NA	NA	G	NA	A	MOSHI::IRGC 70730-1::[IRIS 313-11815]	IRIS 313-11815	IRGC 127633	ind3	18	C	T	T	-	-	-	C	C	C	T	C	-	-	-	-	A	A	G	C	T	T	-	A	-	G	G	C	T	T
IRIS_313-11853	NA	NA	NA	NA	T	NA	NA	G	NA	C	NA	NA	G	NA	A	BU ZHI MING::IRGC 71971-1::[IRIS 313-11853]	IRIS 313-11853	IRGC 127242	ind1A	16	C	T	T	-	-	-	C	C	C	T	C	-	-	-	-	A	A	G	C	T	T	-	A	-	G	G	C	T	T
IRIS_313-11860	NA	NA	NA	NA	T	NA	NA	G	NA	C	NA	NA	G	NA	A	GUA PAI GU::IRGC 72078-1::[IRIS 313-11860]	IRIS 313-11860	IRGC 127394	ind1A	5	C	T	T	-	-	-	C	C	C	T	C	-	-	-	-	C	-	G	C	T	T	-	A	-	G	G	C	T	T
IRIS_313-11871	NA	NA	NA	NA	T	NA	NA	G	NA	C	NA	NA	G	NA	A	SAN ZHAO QI::IRGC 72289-1::[IRIS 313-11871]	IRIS 313-11871	IRGC 127787	ind1A	17	C	T	T	-	-	-	C	C	C	T	C	-	-	-	-	C	-	G	C	T	T	-	A	-	G	G	C	T	T
IRIS_313-11889	NA	NA	NA	NA	T	NA	NA	G	NA	C	NA	NA	G	NA	A	MURGI BRINJ::IRGC 73109-1::[IRIS 313-11889]	IRIS 313-11889	IRGC 127639	indx	1	C	T	T	-	-	-	C	C	C	T	C	-	-	-	-	C	-	G	C	T	T	-	A	-	G	G	C	T	T
IRIS_313-11937	NA	NA	NA	NA	T	NA	NA	G	NA	C	NA	NA	G	NA	A	KUNJUKUNJU::IRGC 75448-1::[IRIS 313-11937]	IRIS 313-11937	IRGC 127535	indx	11	C	T	T	-	-	-	C	C	C	T	C	-	-	-	-	C	-	G	C	T	T	-	A	-	G	G	C	T	T
IRIS_313-11956	NA	NA	NA	NA	T	NA	NA	G	NA	C	NA	NA	G	NA	A	JUNGEMARSI::IRGC 76901-1::[IRIS 313-11956]	IRIS 313-11956	IRGC 128325	admix	0	C	T	T	-	-	-	C	C	C	T	C	-	-	-	-	C	-	G	C	T	T	-	A	-	G	G	C	T	T
IRIS_313-11980	NA	NA	NA	NA	T	NA	NA	G	NA	C	NA	NA	G	NA	A	HSINCHU AI CHIO CHIENG::IRGC 78182-1::[IRIS 313-11980]	IRIS 313-11980	IRGC 127420	ind1A	13	C	T	T	-	-	-	C	C	C	T	C	-	-	-	-	C	-	G	C	T	T	-	A	-	G	G	C	T	T
IRIS_313-12002	NA	NA	NA	NA	T	NA	NA	G	NA	C	NA	NA	G	NA	A	LARA BORO::IRGC 79342-1::[IRIS 313-12002]	IRIS 313-12002	IRGC 127553	aus	3	C	T	T	-	-	-	C	C	C	T	C	-	-	-	-	C	-	G	C	T	T	-	A	-	G	G	C	T	T
IRIS_313-12055	NA	NA	NA	NA	T	NA	NA	G	NA	C	NA	NA	G	NA	A	LAL MOTI::IRGC 82168-1::[IRIS 313-12055]	IRIS 313-12055	IRGC 127545	aus	6	C	T	T	-	-	-	C	C	C	T	C	-	-	-	-	C	-	G	C	T	T	-	A	-	G	G	C	T	T
IRIS_313-12078	NA	NA	NA	NA	T	NA	NA	G	NA	C	NA	NA	G	NA	C	DAU NGHA THAI BINH::IRGC 82891-1::[IRIS 313-12078]	IRIS 313-12078	IRGC 127301	indx	1	C	T	T	-	-	-	C	C	C	T	C	-	-	-	-	C	-	G	C	T	T	-	A	-	G	G	C	T	T
IRIS_313-12096	NA	NA	NA	NA	T	NA	NA	G	NA	C	NA	NA	G	NA	A	NEANG CHEK::IRGC 83894-1::[IRIS 313-12096]	IRIS 313-12096	IRGC 135573	ind3	4	C	T	T	-	-	-	C	C	C	T	C	-	-	-	-	C	-	G	C	T	T	-	A	-	G	G	C	T	T
IRIS_313-12139	NA	NA	NA	NA	T	NA	NA	G	NA	C	NA	NA	G	NA	A	MANSARA DHAN::IRGC 86940-1::[IRIS 313-12139]	IRIS 313-12139	IRGC 127604	aus	2	C	T	T	-	-	-	C	C	C	T	C	-	-	-	-	C	-	G	C	T	T	-	A	-	G	G	C	T	T
IRIS_313-12185	NA	NA	NA	NA	T	NA	NA	G	NA	C	NA	NA	G	NA	A	AE NOUA::IRGC 89308-1::[IRIS 313-12185]	IRIS 313-12185	IRGC 127110	indx	12	C	T	T	-	-	-	C	C	C	T	C	-	-	-	-	C	-	G	C	T	T	-	A	-	G	G	C	T	T
IRIS_313-15899	NA	NA	NA	NA	T	NA	NA	G	NA	C	NA	NA	G	NA	A	IR 45427-2B-2-2B-1-1::G1::[IRIS 313-15899]	IRIS 313-15899	IRGC 126961	indx	73	C	-	T	-	-	-	C	C	C	T	C	-	-	-	-	C	-	G	C	T	T	-	A	-	G	G	C	T	T
IRIS_313-7646	NA	NA	NA	NA	T	NA	NA	G	NA	C	NA	NA	G	NA	A	BETSILAIZINA::GERVEX 8405-C1::[IRIS 313-7646]	IRIS 313-7646	IRGC 124378	admix	14.5	C	T	T	-	-	-	C	C	C	T	C	-	-	-	-	C	-	G	C	T	T	-	A	-	G	G	C	T	T
IRIS_313-7684	NA	NA	NA	NA	T	NA	NA	G	NA	C	NA	NA	G	NA	A	IR 1561-228-3-3::IRGC 32627-C1::[IRIS 313-7684]	IRIS 313-7684	IRGC 122088	indx	7	C	T	T	-	-	-	C	C	C	T	C	-	-	-	-	C	-	G	C	T	T	-	A	-	G	G	C	T	T
IRIS_313-7691	NA	NA	NA	NA	T	NA	NA	G	NA	C	NA	NA	G	NA	A	IR 28::IRGC 30411-C1::[IRIS 313-7691]	IRIS 313-7691	IRGC 122094	ind1B	16	C	T	T	-	-	-	C	C	C	T	C	-	-	-	-	C	-	G	C	T	T	-	A	-	G	G	C	T	T
IRIS_313-7722	NA	NA	NA	NA	T	NA	NA	G	NA	C	NA	NA	G	NA	A	LATSIBOZAKA 112-1::GERVEX 8233-C1::[IRIS 313-7722]	IRIS 313-7722	IRGC 127001	admix	21	C	T	T	-	-	-	C	C	C	T	C	-	-	-	-	A	A	G	C	T	T	-	A	-	G	G	C	T	T
IRIS_313-7728	NA	NA	NA	NA	T	NA	NA	G	NA	C	NA	NA	G	NA	A	MAMORIAKA 114::GERVEX 5176-C1::[IRIS 313-7728]	IRIS 313-7728	IRGC 122159	ind2	14	C	T	T	-	-	-	C	C	C	T	C	-	-	-	-	A	A	G	C	T	T	-	A	-	G	G	C	T	T
IRIS_313-7758	NA	NA	NA	NA	T	NA	NA	G	NA	C	NA	NA	G	NA	A	ROJOKELY::GERVEX 8410-C1::[IRIS 313-7758]	IRIS 313-7758	IRGC 122220	ind2	17	C	T	T	-	-	-	C	C	C	T	C	-	-	-	-	A	A	G	C	T	T	-	A	-	G	G	C	T	T
IRIS_313-7799	NA	NA	NA	NA	T	NA	NA	G	NA	C	NA	NA	G	NA	A	VARY LAVA DE MAROVATO::GERVEX 8396-C1::[IRIS 313-7799]	IRIS 313-7799	IRGC 124428	ind2	23	C	T	T	-	-	-	C	C	C	T	C	-	-	-	-	A	A	G	C	T	T	-	A	-	G	G	C	T	T
IRIS_313-7824	NA	NA	NA	NA	T	NA	NA	G	NA	C	NA	NA	G	NA	A	WAS 21-B-B-20-4-3-3::C1::[IRIS 313-7824]	IRIS 313-7824	IRGC 122291	ind1B	8	C	T	T	-	-	-	C	C	C	T	C	-	-	-	-	C	-	G	C	T	T	-	A	-	G	G	C	T	T
IRIS_313-8076	NA	NA	NA	NA	T	NA	NA	G	NA	C	NA	NA	G	NA	A	PELDE::GERVEX 502-C1::[IRIS 313-8076]	IRIS 313-8076	IRGC 122198	trop	0	C	T	T	-	-	-	C	C	C	T	C	-	-	-	-	C	-	G	C	T	T	-	A	-	G	G	C	T	T
IRIS_313-8252	NA	NA	NA	NA	T	NA	NA	G	NA	C	NA	NA	G	NA	A	JAGLI BORO::IRGC 27516-2::[IRIS 313-8252]	IRIS 313-8252	IRGC 121233	aus	8	C	T	T	-	-	-	C	C	C	T	C	-	-	-	-	C	-	G	C	T	T	-	A	-	G	G	C	T	T
IRIS_313-8283	NA	NA	NA	NA	T	NA	NA	G	NA	C	NA	NA	G	NA	A	KOYRA::IRGC 77267-1::[IRIS 313-8283]	IRIS 313-8283	IRGC 121026	aus	1	C	T	T	-	-	-	C	C	C	T	C	-	-	-	-	C	-	G	C	T	T	-	A	-	G	G	C	T	T
IRIS_313-8398	NA	NA	NA	NA	T	NA	NA	G	NA	C	NA	NA	G	NA	A	KHARSU 80::IRGC 28016-1::[IRIS 313-8398]	IRIS 313-8398	IRGC 121022	aus	9	C	T	T	-	-	-	C	C	C	T	C	-	-	-	-	C	-	G	C	T	T	-	A	-	G	G	C	T	T
IRIS_313-8435	NA	NA	NA	NA	T	NA	NA	G	NA	C	NA	NA	G	NA	A	UPRH 233::IRGC 61667-1::[IRIS 313-8435]	IRIS 313-8435	IRGC 125627	ind1A	4	C	T	T	-	-	-	C	C	C	T	C	-	-	-	-	C	-	G	C	T	T	-	A	-	G	G	C	T	T
IRIS_313-8704	NA	NA	NA	NA	T	NA	NA	G	NA	C	NA	NA	G	NA	A	ROPA::IRGC 74774-1::[IRIS 313-8704]	IRIS 313-8704		ind2	6	C	T	T	-	-	-	C	C	C	T	C	-	-	-	-	A	A	G	C	T	T	-	A	-	G	G	C	T	T
IRIS_313-8721	NA	NA	NA	NA	T	NA	NA	G	NA	C	NA	NA	G	NA	A	HOLOI BASH (SOLOI BASH)::IRGC 64778-1::[IRIS 313-8721]	IRIS 313-8721	IRGC 120969	aus	7	C	T	T	-	-	-	C	C	C	T	C	-	-	-	-	C	-	G	C	T	T	-	A	-	G	G	C	T	T
IRIS_313-8739	NA	NA	NA	NA	T	NA	NA	G	NA	C	NA	NA	G	NA	A	TAI 6::IRGC 69058-1::[IRIS 313-8739]	IRIS 313-8739	IRGC 126090	admix	17	C	T	T	-	-	-	C	C	C	T	C	-	-	-	-	A	A	G	C	T	T	-	A	-	G	G	C	T	T
IRIS_313-8743	NA	NA	NA	NA	T	NA	NA	G	NA	C	NA	NA	G	NA	A	NIAO YAO::IRGC 5496-1::[IRIS 313-8743]	IRIS 313-8743	IRGC 126075	indx	1	C	T	T	-	-	-	C	C	C	T	C	-	-	-	-	C	-	G	C	T	T	-	A	-	G	G	C	T	T
IRIS_313-8754	NA	NA	NA	NA	T	NA	NA	G	NA	C	NA	NA	G	NA	A	TYPE 50::IRGC 74782-1::[IRIS 313-8754]	IRIS 313-8754	IRGC 126011	ind2	5	C	T	T	-	-	-	C	C	C	T	C	-	-	-	-			G	C	T	T	-	A	-	G	G	C	T	T
IRIS_313-8781	NA	NA	NA	NA	T	NA	NA	G	NA	C	NA	NA	G	NA	A	TAPANG::IRGC 13361-1::[IRIS 313-8781]	IRIS 313-8781		ind3	13	C	T	T	-	-	-	C	C	C	T	C	-	-	-	-	C	-	G	C	T	T	-	A	-	G	G	C	T	T
IRIS_313-8789	NA	NA	NA	NA	T	NA	NA	G	NA	C	NA	NA	G	NA	A	LALSAITA::IRGC 43915-1::[IRIS 313-8789]	IRIS 313-8789	IRGC 121036	aus	6	C	T	T	-	-	-	C	C	C	T						A	A	G	C	T	T	-	A	-	G	G	C	T	T
IRIS_313-8793	NA	NA	NA	NA	T	NA	NA	G	NA	C	NA	NA	G	NA	A	KHAO THI RATE::IRGC 58041-1::[IRIS 313-8793]	IRIS 313-8793	IRGC 126223	ind3	4	C	T	T	-	-	-	C	C	C	T	C	-	-	-	-			G	C	T	T	-			G	G	C	T	T
IRIS_313-8920	NA	NA	NA	NA	T	NA	NA	G	NA	C	NA	NA	G	NA	A	PATALASAFED SUNGHAWADO::IRGC 61133-1::[IRIS 313-8920]	IRIS 313-8920	IRGC 125869	ind2	14	C	T	T	-	-	-	C	C	C	T	C	-	-	-	-	A	A	G	C	T	T	-	A	-	G	G	C	T	T
IRIS_313-8924	NA	NA	NA	NA	T	NA	NA	G	NA	C	NA	NA	G	NA	A	KUTTA::IRGC 52184-1::[IRIS 313-8924]	IRIS 313-8924	IRGC 125815	ind2	13	C	T	T	-	-	-	C	C	C	T	C	-	-	-	-	A	A	G	C	T	T	-	A	-	G	G	C	T	T
IRIS_313-8925	NA	NA	NA	NA	T	NA	NA	G	NA	C	NA	NA	G	NA	A	KURULUTUDU::IRGC 36304-1::[IRIS 313-8925]	IRIS 313-8925	IRGC 125813	ind2	24	C	T	T	-	-	-	C	C	C	T	C	-	-	-	-	A	A	G	C	T	T	-	A	-	G	G	C	T	T
IRIS_313-8940	NA	NA	NA	NA	T	NA	NA	G	NA	C	NA	NA	G	NA	A	FU ZAO XIAN::IRGC 63619-1::[IRIS 313-8940]	IRIS 313-8940	IRGC 125744	ind1A	12	C	T	T	-	-	-	C	C	C	T	C	-	-	-	-	C	-	G	C	T	T	-	A	-	G	G	C	T	T
IRIS_313-9002	NA	NA	NA	NA	T	NA	NA	G	NA	C	NA	NA	G	NA	A	KOTOBUKI MOCHI::[IRIS 313-9002]	IRIS 313-9002	IRGC 117518	temp	1	C	T	T	-	-	-	C	C	C	T	C	-	-	-	-	C	-	G	C	T	T	-	A	-	G	G	C	T	T
IRIS_313-9039	NA	NA	NA	NA	T	NA	NA	G	NA	C	NA	NA	G	NA	A	MUTTU SAMBA::IRGC 36333-1::[IRIS 313-9039]	IRIS 313-9039	IRGC 121441	ind2	24	C	T	T	-	-	-	C	C	C	T	C	-	-	-	-	A	A	G	C	T	T	-	A	-	G	G	C	T	T
IRIS_313-9065	NA	NA	NA	NA	T	NA	NA	G	NA	C	NA	NA	G	NA	A	PAI CHUEH CHIU LIU::IRGC 34259-1::[IRIS 313-9065]	IRIS 313-9065	IRGC 125865	ind1A	3	C	T	T	-	-	-	C	C	C	T	C	-	-	-	-	C	-	G	C	T	T	-	A	-	G	G	C	T	T
IRIS_313-9392	NA	NA	NA	NA	T	NA	NA	G	NA	C	NA	NA	G	NA	A	ARC 11626::IRGC 21528-1::[IRIS 313-9392]	IRIS 313-9392	IRGC 125642	admix	0	C	T	T	-	-	-	C	C	C	T	C	-	-	-	-	C	-	G	C	T	T	-	A	-	G	G	C	T	T
IRIS_313-9403	NA	NA	NA	NA	T	NA	NA	G	NA	C	NA	NA	G	NA	A	BADUIE::IRGC 53715-1::[IRIS 313-9403]	IRIS 313-9403	IRGC 125666	ind2	13	C	T	T	-	-	-	C	C	C	T	C	-	-	-	-	A	A	G	C	T	T	-	A	-	G	G	C	T	T
IRIS_313-9424	NA	NA	NA	NA	T	NA	NA	G	NA	C	NA	NA	G	NA	A	ARC 5840::IRGC 12144-1::[IRIS 313-9424]	IRIS 313-9424	IRGC 125656	indx	10	C	T	T	-	-	-	C	C	C	T	C	-	-	-	-	A	A	G	C	T	T	-	A	-	G	G	C	T	T
IRIS_313-9570	NA	NA	NA	NA	T	NA	NA	G	NA	C	NA	NA	G	NA	A	NX 3533::IRGC 63796-1::[IRIS 313-9570]	IRIS 313-9570	IRGC 125859	indx	5	C	T	T	-	-	-	C	C	C	T	C	-	-	-	-	C	-	G	C	T	T	-	A	-	G	G	C	T	T
IRIS_313-9605	NA	NA	NA	NA	T	NA	NA	G	NA	C	NA	NA	G	NA	A	NCS 194::IRGC 51932-1::[IRIS 313-9605]	IRIS 313-9605	IRGC 125852	ind1A	13	C	T	T	-	-	-	C	C	C	T	C	-	-	-	-	C	-	G	C	T	T	-	A	-	G	G	C	T	T
IRIS_313-9611	NA	NA	NA	NA	T	NA	NA	G	NA	C	NA	NA	G	NA	A	WANGA BARUGULU::IRGC 52261-1::[IRIS 313-9611]	IRIS 313-9611	IRGC 125935	ind2	12	C	T	T	-	-	-	C	C	C	T	C	-	-	-	-	C	-	G	C	T	T	-	A	-	G	G	C	T	T
IRIS_313-9636	NA	NA	NA	NA	T	NA	NA	G	NA	C	NA	NA	G	NA	A	PODI HEENATI::IRGC 36345-1::[IRIS 313-9636]	IRIS 313-9636	IRGC 121473	aus	3	C	T	T	-	-	-	C	C	C	T	C	-	-	-	-	C	-	G	C	T	T	-	A	-	G	G	C	T	T
IRIS_313-9705	NA	NA	NA	NA	T	NA	NA	G	NA	C	NA	NA	G	NA	A	TAITUNG WOO LI::IRGC 111-1::[IRIS 313-9705]	IRIS 313-9705	IRGC 125914	ind1A	3	C	T	T	-	-	-	C	C	C	T	C	-	-	-	-	C	-	G	C	T	T	-	A	-	G	G	C	T	T
IRIS_313-9732	NA	NA	NA	NA	T	NA	NA	G	NA	C	NA	NA	G	NA	A	MAMORIAKA::IRGC 68672-1::[IRIS 313-9732]	IRIS 313-9732	IRGC 125833	ind2	9	C	T	T	-	-	-	C	C	C	T	C	-	-	-	-	C	-	G	C	T	T	-	A	-	G	G	C	T	T
IRIS_313-9832	NA	NA	NA	NA	T	NA	NA	G	NA	C	NA	NA	G	NA	A	RANGOON SAMBA::IRGC 11940-1::[IRIS 313-9832]	IRIS 313-9832	IRGC 125883	ind2	7.5	C	T	T	-	-	-	C	C	C	T	C	-	-	-	-	C	-	G	C	T			A	-	G	G	C	T	T
IRIS_313-9970	NA	NA	NA	NA	T	NA	NA	G	NA	C	NA	NA	G	NA	C	RACE PERUMAL::IRGC 55347-1::[IRIS 313-9970]	IRIS 313-9970	IRGC 125881	ind2	21	C	T	T	-	-	-	C	C	C	T	C	-	-	-	-	A	A	G	C	T	T	-	A	-	G	G	C	T	T
CX48	NA	C/T	NA	NA	T	NA	NA	G	NA	C	NA	NA	G	NA	A	PT60::[CX48]	CX48		indx	1	C	T	T	-	-	-	C	C	C	T	C	-	-	-	-	C	-	G	C	T	T	-	A	-	G	G	C	T	T
IRIS_313-10724	NA	C/T	NA	NA	T	NA	NA	G	NA	C	NA	NA	G	NA	C	MOUSOIR::IRGC 15866-1::[IRIS 313-10724]	IRIS 313-10724		ind3	12	C	T	T	-	-	-	C	C	C	T	C	-	-	-	-	C	-	G	C	T	T	-	A	-	G	G	C	T	T
IRIS_313-11014	NA	C/T	NA	NA	T	NA	NA	G	NA	C	NA	NA	G	NA	A	CHAKILA::IRGC 27540-1::[IRIS 313-11014]	IRIS 313-11014	IRGC 127253	aus	5	C	T	T	-	-	-	C	C	C	T	C	-	-	-	-	C	-	G	C	T	T	-	A	-	G	G	C	T	T
IRIS_313-11056	NA	C/T	NA	NA	T	NA	NA	G	NA	C	NA	NA	G	NA	A	AUS 301::IRGC 29089-1::[IRIS 313-11056]	IRIS 313-11056	IRGC 127186	aus	14	C	T	T	-	-	-	C	C	C	T	C	-	-	-	-	C	-	G	C	T	T	-	A	-	G	G	C	T	T
IRIS_313-11062	NA	C/T	NA	NA	T	NA	NA	G	NA	C	NA	NA	G	NA	A	BEGUNBICHI 33::IRGC 29260-1::[IRIS 313-11062]	IRIS 313-11062	IRGC 127218	aro	0	C	T	T	-	-	-	C	C	C	T	C	-	-	-	-	C	-	G	C	T	T	-	A	-	G	G	C	T	T
IRIS_313-11241	NA	C/T	NA	NA	T	NA	NA	G	NA	C	NA	NA	G	NA	A	BR 116-3B-53::IRGC 39559-2::[IRIS 313-11241]	IRIS 313-11241	IRGC 128001	ind2	24	C	T	T	-	-	-	C	C	C	T	C	-	-	-	-	A	A	G	C	T	T	-	A	-	G	G	C	T	T
IRIS_313-11274	NA	C/T	NA	NA	T	NA	NA	G	NA	C	NA	NA	G	NA	A	ARC 14901::IRGC 41811-1::[IRIS 313-11274]	IRIS 313-11274	IRGC 127155	aus	3	C	T	T	-	-	-	C	C	C	T	C	-	-	-	-	C	-	G	C	T	T	-	A	-	G	G	C	T	T
IRIS_313-11283	NA	C/T	NA	NA	T	NA	NA	G	NA	C	NA	NA	G	NA	A	ARC 15743::IRGC 42127-2::[IRIS 313-11283]	IRIS 313-11283	IRGC 132320	indx	24	C	T	T	-	-	-	C	C	C	T	C	-	-	-	-	A	A	G	C	T	T	-	A	-	G	G	C	T	T
IRIS_313-11554	NA	C/T	NA	NA	T	NA	NA	G	NA	C	NA	NA	G	NA	A	PA RABICHINA::IRGC 58609-1::[IRIS 313-11554]	IRIS 313-11554	IRGC 132291	ind3	14	C	T	T	-	-	-	C	C	C	T	C	-	-	-	-	C	-	G	C	T	T	-	A	-	G	G	C	T	T
IRIS_313-11594	NA	C/T	NA	NA	T	NA	NA	G	NA	C	NA	NA	G	NA	C	CHAN THANH HOA::IRGC 60647-1::[IRIS 313-11594]	IRIS 313-11594	IRGC 127259	indx	16	C	T	T	-	-	-	C	C	C	T	C	-	-	-	-	A	A	G	C	T	T	-	A	-	G	G	C	T	T
IRIS_313-11639	NA	C/T	NA	NA	T	NA	NA	G	NA	C	NA	NA	G	NA	A	NCS 349::IRGC 62257-1::[IRIS 313-11639]	IRIS 313-11639	IRGC 127657	indx	17	C	T	T	-	-	-	C	C	C	T	C	-	-	-	-	A	A	G	C	T	T	-	A	-	G	G	C	T	T
IRIS_313-11645	NA	C/T	NA	NA	T	NA	NA	G	NA	C	NA	NA	G	NA	A	NCS 766::IRGC 62478-1::[IRIS 313-11645]	IRIS 313-11645	IRGC 127664	ind2	23	C	T	T	-	-	-	C	C	C	T	C	-	-	-	-	A	A	G	C	T	T	-	A	-	G	G	C	T	T
IRIS_313-11727	NA	C/T	NA	NA	T	NA	NA	G	NA	C	NA	NA	G	NA	A	HONG YANG ZAO 3::IRGC 67177-1::[IRIS 313-11727]	IRIS 313-11727	IRGC 127416	ind1A	5	C	T	T	-	-	-	C	C	C	T	C	-	-	-	-	C	-	G	C	T	T	-	A	-	G	G	C	T	T
IRIS_313-11795	NA	C/T	NA	NA	T	NA	NA	G	NA	C	NA	NA	G	NA	A	DA GU AI 7::IRGC 70075-1::[IRIS 313-11795]	IRIS 313-11795	IRGC 127291	ind1A	13	C	T	T	-	-	-	C	C	C	T	C	-	-	-	-	C	-	G	C	T	T	-	A	-	G	G	C	T	T
IRIS_313-11798	NA	C/T	NA	NA	T	NA	NA	G	NA	C	NA	NA	G	NA	A	E ZI 100::IRGC 70192-1::[IRIS 313-11798]	IRIS 313-11798	IRGC 127365	ind1B	16	C	T	T	-	-	-	C	C	C	T	C	-	-	-	-	C	-	G	C	T	T	-	A	-	G	G	C	T	T
IRIS_313-11804	NA	C/T	NA	NA	T	NA	NA	G	NA	C	NA	NA	G	NA	A	QUN XUAN ZAO::IRGC 70371-1::[IRIS 313-11804]	IRIS 313-11804	IRGC 128441	ind1A	13	C	T	T	-	-	-	C	C	C	T	C	-	-	-	-	C	-	G	C	T	T	-	A	-	G	G	C	T	T
IRIS_313-11810	NA	C/T	NA	NA	T	NA	NA	G	NA	C	NA	NA	G	NA	A	PULURE::IRGC 70647-1::[IRIS 313-11810]	IRIS 313-11810	IRGC 132036	ind3	24	C	T	T	-	-	-	C	C	C	T	C	-	-	-	-	A	A	G	C	T	T	-	A	-	G	G	C	T	T
IRIS_313-11909	NA	C/T	NA	NA	T	NA	NA	G	NA	C	NA	NA	G	NA	A	HONG MI JIU GONG JI::IRGC 74031-1::[IRIS 313-11909]	IRIS 313-11909	IRGC 127414	ind1A	5	C	T	T	-	-	-	C	C	C	T	C	-	-	-	-	C	-	G	C	T	T	-	A	-	G	G	C	T	T
IRIS_313-11953	NA	C/T	NA	NA	T	NA	NA	G	NA	C	NA	NA	G	NA	A	SAN BAO GU::IRGC 76732-1::[IRIS 313-11953]	IRIS 313-11953	IRGC 127783	ind1A	18	C	T	T	-	-	-	C	C	C	T	C	-	-	-	-	A	A	G	C	T	T	-	A	-	G	G	C	T	T
IRIS_313-11963	NA	C/T	NA	NA	T	NA	NA	G	NA	C	NA	NA	G	NA	A	KARANGI::IRGC 77128-1::[IRIS 313-11963]	IRIS 313-11963	IRGC 127491	aus	6	C	T	T	-	-	-	C	C	C	T	C	-	-	-	-	C	-	G	C	T	T	-	A	-	G	G	C	T	T
IRIS_313-7866	NA	C/T	NA	NA	T	NA	NA	G	NA	C	NA	NA	G	NA	A	CNA 7\BO\1\1>33-13-6-1::C1::[IRIS 313-7866]	IRIS 313-7866	IRGC 122018	trop	0	C	T	T	-	-	-	C	C	C	T	C	-	-	-	-	C	-	G	C	T	T	-	A	-	G	G	C	T	T
IRIS_313-8161	NA	C/T	NA	NA	T	NA	NA	G	NA	C	NA	NA	G	NA	A	CNA 4081::GERVEX 1494-C1::[IRIS 313-8161]	IRIS 313-8161	IRGC 122017	ind1B	4	C	T	T	-	-	-	C	C	C	T	C	-	-	-	-	C	-	G	C	T	T	-	A	-	G	G	C	T	T
IRIS_313-8321	NA	C/T	NA	NA	T	NA	NA	G	NA	C	NA	NA	G	NA	A	BHADOIA 303::IRGC 6588-1::[IRIS 313-8321]	IRIS 313-8321	IRGC 120894	aus	4	C	T	T	-	-	-	C	C	C	T	C	-	-	-	-	C	-	G	C	T	T	-	A	-	G	G	C	T	T
IRIS_313-8342	NA	C/T	NA	NA	T	NA	NA	G	NA	C	NA	NA	G	NA	A	KURULU WEE (WHITE)::IRGC 66518-1::[IRIS 313-8342]	IRIS 313-8342	IRGC 121029	aus	5	C	T	T	-	-	-	C	C	C	T	C	-	-	-	-	C	-	G	C	T	T	-	A	-	G	G	C	T	T
IRIS_313-8932	NA	C/T	NA	NA	T	NA	NA	G	NA	C	NA	NA	G	NA	A	PATISAIL::IRGC 37562-1::[IRIS 313-8932]	IRIS 313-8932	IRGC 126079	ind3	13	C	T	T	-	-	-	C	C	C	T	C	-	-	-	-	C	-	G	C	T	T	-	A	-	G	G	C	T	T
IRIS_313-9551	NA	C/T	NA	NA	T	NA	NA	G	NA	C	NA	NA	G	NA	A	BENGALY MORIMO::IRGC 10976-1::[IRIS 313-9551]	IRIS 313-9551	IRGC 125677	ind2	23	C	T	T	-	-	-	C	C	C	T	C	-	-	-	-	A	A	G	C	T	T	-	A	-	G	G	C	T	T
IRIS_313-9626	NA	C/T	NA	NA	T	NA	NA	G	NA	C	NA	NA	G	NA	A	KALIA::IRGC 34699-1::[IRIS 313-9626]	IRIS 313-9626	IRGC 121005	aus	14	C	T	T	-	-	-	C	C	C	T	C	-	-	-	-	C	-	G	C	T	T	-	A	-	G	G	C	T	T
IRIS_313-9706	NA	C/T	NA	NA	T	NA	NA	G	NA	C	NA	NA	G	NA	A	TAIPEI WOO CO::IRGC 112-1::[IRIS 313-9706]	IRIS 313-9706	IRGC 125913	ind1A	5	C	T	T	-	-	-	C	C	C	T	C	-	-	-	-	C	-	G	C	T	T	-	A	-	G	G	C	T	T
IRIS_313-9917	NA	C/T	NA	NA	T	NA	NA	G	NA	C	NA	NA	G	NA	A	CHANDINA::IRGC 36420-1::[IRIS 313-9917]	IRIS 313-9917	IRGC 125699	ind1B	17	C	T	T	-	-	-	C	C	C	T	C	-	-	-	-	A	A	G	C	T	T	-	A	-	G	G	C	T	T
B002	NA	C	NA	NA	T	NA	NA	G	NA	C	NA	NA	G	NA	A	SANSUIJIN::[B002]	B002	IRGC 136041	temp	1	C	T	T	-	-	-	C	C	C	T	C	-	-	-	-	C	-	G	C	T	T	-	A	-	G	G	C	T	T
B003	NA	C	NA	NA	T	NA	NA	G	NA	C	NA	NA	G	NA	A	ZAOSHENGBAI::[B003]	B003	IRGC 136088	japx	0.5	C	T	T	-	-	-	C	C	C	T	C	-	-	-	-	C	-	G	C	T	T	-	A	-	G	G	C	T	T
B004	NA	C	NA	NA	T	NA	NA	G	NA	C	NA	NA	G	NA	A	QIUGUANGTENGXI 104::[B004]	B004	IRGC 136031	temp	0	C	T	T	-	-	-	C	C	C	T	C	-	-	-	-	C	-	G	C	T	T	-	A	-	G	G	C	T	T
B005	NA	C	NA	NA	T	NA	NA	G	NA	C	NA	NA	G	NA	A	WANSHI::[B005]	B005	IRGC 136067	temp	0	C	T	T	-	-	-	C	C	C	T	C	-	-	-	-	C	-	G	C	T	T	-	A	-	G	G	C	T	T
B007	NA	C	NA	NA	T	NA	NA	G	NA	C	NA	NA	G	NA	C	TIANHANDAO::[B007]	B007	IRGC 136055	indx	18	C	T	T	-	-	-	C	C	C	T	C	-	-	-	-	A	A	G	C	T	T	-	A	-	G	G	C	T	T
B008	NA	C	NA	NA	T	NA	NA	G	NA	C	NA	NA	G	NA	A	BAXIANG::[B008]	B008		temp	1	C	T	T	-	-	-	C	C	C	T	C	-	-	-	-	C	-	G	C	T	T	-	A	-	G	G	C	T	T
B009	NA	C	NA	NA	T	NA	NA	G	NA	C	NA	NA	G	NA	A	VIETNAM ZAODAO::[B009]	B009	IRGC 136065	ind1A	13	C	T	T	-	-	-	C	C	C	T	C	-	-	-	-	C	-	G	C	T	T	-	A	-	G	G	C	T	T
B010	NA	C	NA	NA	T	NA	NA	G	NA	C	NA	NA	G	NA	A	MALAIHONG::[B010]	B010		ind1A	13	C	T	T	-	-	-	C	C	C	T	C	-	-	-	-	C	-/A	G	C	T	T	-/A	A	-/A	G	G	C	T	T
B014	NA	C	NA	NA	T	NA	NA	G	NA	C	NA	NA	G	NA	A	WUZILUOSI 215::[B014]	B014	IRGC 136072	temp	0	C	T	T	-	-	-	C	C	C	T	C	-	-	-	-	C	-	G	C	T	T	-	A	-	G	G	C	T	T
B016	NA	C	NA	NA	T	NA	NA	G	NA	C	NA	NA	G	NA	A	AOMIERTE 168::[B016]	B016	IRGC 135829	temp	0	C	T	T	-	-	-	C	C	C	T	C	-	-	-	-	C	-	G	C	T	T	-	A	-	G	G	C	T	T
B018	NA	C	NA	NA	T	NA	NA	G	NA	C	NA	NA	G	NA	A	AMERICAN HUANGKEDAO::[B018]	B018	IRGC 135827	trop	0	C	T	T	-	-	-	C	C	C	T	C	-	-	-	-	C	-	G	C	T	T	-	A	-	G	G	C	T	T
B020	NA	C	NA	NA	T	NA	NA	G	NA	C	NA	NA	G	NA	A	JINEIYADAO::[B020]	B020	IRGC 135958	admix	13	C	T	T	-	-	-	C	C	C	T	C	-	-	-	-	A	A	G	C	T	T	-	A	-	G	G	C	T	T
B023	NA	C	NA	NA	T	NA	NA	G	NA	C	NA	NA	G	NA	A	GAOLIQIU::[B023]	B023	IRGC 135891	temp	0.5	C	T	T	-	-	-	C	C	C	T	C	-	-	-	-	C	-	G	C	T	T	-	A	-	G	G	C	T	T
B024	NA	C	NA	NA	T	NA	NA	G	NA	C	NA	NA	G	NA	A	XIANLUOSICHI::[B024]	B024	IRGC 136076	ind1A	13	C	T	T	-	-	-	C	C	C	T	C	-	-	-	-	C	-	G	C	T	T	-	A	-	G	G	C	T	T
B025	NA	C	NA	NA	T	NA	NA	G	NA	C	NA	NA	G	NA	A	DJANDA MANDJA::[B025]	B025	IRGC 135881	trop	1	C	T	T	-	-	-	C	C	C	T	C	-	-	-	-	C	-	G	C	T	T	-	A	-	G	G	C	T	T
B034	NA	C	NA	NA	T	NA	NA	G	NA	C	NA	NA	G	NA	A	ALBANIA RICE::[B034]	B034	IRGC 135825	temp	0	C	T	T	-	-	-	C	C	C	T	C	-	-	-	-	C	-	G	C	T	T	-	A	-	G	G	C	T	T
B036	NA	C	NA	NA	T	NA	NA	G	NA	C	NA	NA	G	NA	A	JIJUCAS CLARO::[B036]	B036	IRGC 135955	japx	1	C	T	T	-	-	-	C	C	C	T	C	-	-	-	-	C	-	G	C	T	T	-	A	-	G	G	C	T	T
B037	NA	C	NA	NA	T	NA	NA	G	NA	C	NA	NA	G	NA	A	NANOAY P.A::[B037]	B037	IRGC 135999	trop	0	C	T	T	-	-	-	C	C	C	T	C	-	-	-	-	C	-	G	C	T	T	-	A	-	G	G	C	T	T
B043	NA	C	NA	NA	T	NA	NA	G	NA	C	NA	NA	G	NA	A	YR 83-23-11::[B043]	B043	IRGC 136081	trop	0	C	T	T	-	-	-	C	C	C	T	C	-	-	-	-	C	-	G	C	T	T	-	A	-	G	G	C	T	T
B044	NA	C	NA	NA	T	NA	NA	G	NA	C	NA	NA	G	NA	C	SANTIANNUO::[B044]	B044	IRGC 136042	indx	2	C	T	T	-	-	-	C	C	C	T	C	-	-	-	-	C	-	G	C	T	T	-	A	-	G	G	C	T	T
B045	NA	C	NA	NA	T	NA	NA	G	NA	C	NA	NA	G	NA	A	GONGCHENGXIANG::[B045]	B045	IRGC 135896	temp	0	C	T	T	-	-	-	C	C	C	T	C	-	-	-	-	C	-	G	C	T	T	-	A	-	G	G	C	T	T
B046	NA	C	NA	NA	T	NA	NA	G	NA	C	NA	NA	G	NA	A	QIUTIANXIAOTING::[B046]	B046	IRGC 136032	temp	0	C	T	T	-	-	-	C	C	C	T	C	-	-	-	-	C	-	G	C	T	T	-	A	-	G	G	C	T	T
B052	NA	C	NA	NA	T	NA	NA	G	NA	C	NA	NA	G	NA	A	J34::[B052]	B052	IRGC 135949	ind2	21	C	T	T	-	-	-	C	C	C	T	C	-	-	-	-	A	A	G	C	T	T	-	A	-	G	G	C	T	T
B053	NA	C	NA	NA	T	NA	NA	G	NA	C	NA	NA	G	NA	A	80A97YR303-304-1-3::[B053]	B053	IRGC 135819	trop	0	C	T	T	-	-	-	C	C	C	T	C	-	-	-	-	C	-	G	C	T	T	-	A	-	G	G	C	T	T
B054	NA	C	NA	NA	T	NA	NA	G	NA	C	NA	NA	G	NA	A	80050YR72136-43::[B054]	B054	IRGC 135817	trop	0	C	T	T	-	-	-	C	C	C	T	C	-	-	-	-	C	-	G	C	T	T	-	A	-	G	G	C	T	T
B055	NA	C	NA	NA	T	NA	NA	G	NA	C	NA	NA	G	NA	A	YR196::[B055]	B055	IRGC 136080	temp	16	C	T	T	-	-	-	C	C	C	T	C	-	-	-	-	A	A	G	C	T	T	-	A	-	G	G	C	T	T
B056	NA	C	NA	NA	T	NA	NA	G	NA	C	NA	NA	G	NA	A	TIEGANWU::[B056]	B056		temp	2	C	T	T	-	-	-	C	C	C	T	C	-	-	-	-	C	-	G	C	T	T	-	A	-	G	G	C	T	T
B057	NA	C	NA	NA	T	NA	NA	G	NA	C	NA	NA	G	NA	A	XIUSHUI 115::[B057]	B057		temp	3	C	T	T	-	-	-	C	C	C	T	C	-	-	-	-	C	-	G	C	T	T	-	A	-	G	G	C	T	T
B059	NA	C	NA	NA	T	NA	NA	G	NA	C	NA	NA	G	NA	A	NANJING 11::[B059]	B059		ind1A	5	C	T	T	-	-	-	C	C	C	T	C	-	-	-	-	C	-	G	C	T	T	-	A	-	G	G	C	T	T
B068	NA	C	NA	NA	T	NA	NA	G	NA	C	NA	NA	G	NA	A	GAOYANGDIANDAO DAHONGMANG::[B068]	B068		temp	2	C	T	T	-	-	-	C	C	C	T	C	-	-	-	-	C	-	G	C	T	T	-	A	-	G	G	C	T	T
B069	NA	C	NA	NA	T	NA	NA	G	NA	C	NA	NA	G	NA	A	DANDONGLUDAO::[B069]	B069		japx	0.5	C	T	T	-	-	-	C	C	C	T	C	-	-	-	-	C	-	G	C	T	T	-	A	-	G	G	C	T	T
B070	NA	C	NA	NA	T	NA	NA	G	NA	C	NA	NA	G	NA	A	LAOGUANGTOU 83::[B070]	B070		japx	1	C	T	T	-	-	-	C	C	C	T	C	-	-	-	-	C	-	G	C	T	T	-	A	-	G	G	C	T	T
B071	NA	C	NA	NA	T	NA	NA	G	NA	C	NA	NA	G	NA	A	MUXIQIU::[B071]	B071		temp	0	C	T	T	-	-	-	C	C	C	T	C	-	-	-	-	C	-	G	C	T	T	-	A	-	G	G	C	T	T
B074	NA	C	NA	NA	T	NA	NA	G	NA	C	NA	NA	G	NA	A	TAISHANNUO::[B074]	B074		ind1A	13	C	T	T	-	-	-	C	C	C	T	C	-	-	-	-	C	-	G	C	T	T	-	A	-	G	G	C	T	T
B083	NA	C	NA	NA	T	NA	NA	G	NA	C	NA	NA	G	NA	A	DONGTINGWANXIAN::[B083]	B083		ind1A	16	C	T	T	-	-	-	C	C	C	T	C	-	-	-	-	A	A	G	C	T	T	-	A	-	G	G	C	T	T
B084	NA	C	NA	NA	T	NA	NA	G	NA	C	NA	NA	G	NA	A	BAWANGBIAN 1::[B084]	B084		admix	0	C	T	T	-	-	-	C	C	C	T	C	-	-	-	-	C	-	G	C	T	T	-	A	-	G	G	C	T	T
B089	NA	C	NA	NA	T	NA	NA	G	NA	C	NA	NA	G	NA		QITOUBAIGU3::[B089]	B089		indx	22	C	T	T	-	-	-	C	C	C	T	C	-	-	-	-	A	A	G	C	T	T	-	A	-	G	G	C	T	T
B090	NA	C	NA	NA	T	NA	NA	G	NA	C	NA	NA	G	NA	A	ZIMI::[B090]	B090		indx	15	C	T	T	-	-	-	C	C	C	T	C	-	-	-	-	A	A	G	C	T	T	-	A	-	G	G	C	T	T
B092	NA	C	NA	NA	T	NA	NA	G	NA	C	NA	NA	G	NA	A	GONGJU 73::[B092]	B092		ind1A	5	C	T	T	-	-	-	C	C	C	T	C	-	-	-	-	C	-	G	C	T	T	-	A	-	G	G	C	T	T
B094	NA	C	NA	NA	T	NA	NA	G	NA	C	NA	NA	G	NA	A/C	ZINUO::[B094]	B094		ind1A	7	C	T	T	-	-	-	C	C	C	T	C	-	-	-	-	C	-/A	G	C	T	T	-/A	A	-/A	G	G	C	T	T
B095	NA	C	NA	NA	T	NA	NA	G	NA	C	NA	NA	G	NA	A	MOWANGGUNEIZA::[B095]	B095		indx	15	C	T	T	-	-	-	C	C	C	T	C	-	-	-	-	A	A	G	C	T	T	-	A	-	G	G	C	T	T
B096	NA	C	NA	NA	T	NA	NA	G	NA	C	NA	NA	G	NA	A	JINZHINUO4::[B096]	B096		indx	13	C	T	T	-	-	-	C	C	C	T	C	-	-	-	-	A	A	G	C	T	T	-	A	-	G	G	C	T	T
B101	NA	C	NA	NA	T	NA	NA	G	NA	C	NA	NA	G	NA	A	YANGKENUO::[B101]	B101		temp	0	C	T	T	-	-	-	C	C	C	T	C	-	-	-	-	C	-	G	C	T	T	-	A	-	G	G	C	T	T
B102	NA	C	NA	NA	T	NA	NA	G	NA	C	NA	NA	G	NA	A	MAGUZI::[B102]	B102		temp	0	C	T	T	-	-	-	C	C	C	T	C	-	-	-	-	C	-	G	C	T	T	-	A	-	G	G	C	T	T
B104	NA	C	NA	NA	T	NA	NA	G	NA	C	NA	NA	G	NA		JIABALA::[B104]	B104		ind1A	13	C	T	T	-	-	-	C	C	C	T	C	-	-	-	-	C	-	G	C	T	T	-	A	-	G	G	C	T	T
B108	NA	C	NA	NA	T	NA	NA	G	NA	C	NA	NA	G	NA	A	XIANGGU::[B108]	B108		indx	15	C	T	T	-	-	-	C	C	C	T	C	-	-	-	-	A	A	G	C	T	T	-	A	-	G	G	C	T	T
B109	NA	C	NA	NA	T	NA	NA	G	NA	C	NA	NA	G	NA	A	LENGSHUIGU 2::[B109]	B109		japx	0.5	C	T	T	-	-	-	C	C	C	T	C	-	-	-	-	C	-	G	C	T	T	-	A	-	G	G	C	T	T
B112	NA	C	NA	NA	T	NA	NA	G	NA	C	NA	NA	G	NA	A	LIUSHA 1::[B112]	B112		ind1A	4	C	T	T	-	-	-	C	C	C	T	C	-	-	-	-	C	-	G	C	T	T	-	A	-	G	G	C	T	T
B114	NA	C	NA	NA	T	NA	NA	G	NA	C	NA	NA	G	NA	A	CHENGDUAI 3::[B114]	B114		ind1A	1	C	T	T	-	-	-	C	C	C	T	C	-	-	-	-	C	-	G	C	T	T	-	A	-	G	G	C	T	T
B117	NA	C	NA	NA	T	NA	NA	G	NA	C	NA	NA	G	NA	A	LIXINGENG::[B117]	B117		temp	0	C	T	T	-	-	-	C	C	C	T	C	-	-	-	-	C	-	G	C	T	T	-			G	G	C	T	T
B119	NA	C	NA	NA	T	NA	NA	G	NA	C	NA	NA	G	NA		GUANGLUAI 15-1::[B119]	B119		ind1A	4	C	T	T	-	-	-	C	C	C	T	C	-	-	-	-	C	-	G	C	T	T	-	A	-	G	G	C	T	T
B121	NA	C	NA	NA	T	NA	NA	G	NA	C	NA	NA	G	NA	A	LUKE 3::[B121]	B121		ind1A	5	C	T	T	-	-	-	C	C	C	T	C	-	-	-	-	C	-	G	C	T	T	-	A	-	G	G	C	T	T
B125	NA	C	NA	NA	T	NA	NA	G	NA	C	NA	NA	G	NA	A	XIANGWANXIAN 3::[B125]	B125		indx	13	C	T	T	-	-	-	C	C	C	T	C	-	-	-	-	C	-	G	C	T	T	-	A	-	G	G	C	T	T
B126	NA	C	NA	NA	T	NA	NA	G	NA	C	NA	NA	G	NA	A	ZAOXIAN 240::[B126]	B126		ind1A	4	C	T	T	-	-	-	C	C	C	T	C	-	-	-	-	C	-	G	C	T	T	-	A	-	G	G	C	T	T
B127	NA	C	NA	NA	T	NA	NA	G	NA	C	NA	NA	G	NA	A	DANGYU 5::[B127]	B127		ind1A	4	C	T	T	-	-	-	C	C	C	T	C	-	-	-	-	C	-	G	C	T	T	-	A	-	G	G	C	T	T
B133	NA	C	NA	NA	T	NA	NA	G	NA	C	NA	NA	G	NA	A	YANSHUICHI::[B133]	B133		indx	14	C	T	T	-	-	-	C	C	C	T	C	-	-	-	-	A	A	G	C	T	T	-	A	-	G	G	C	T	T
B134	NA	C	NA	NA	T	NA	NA	G	NA	C	NA	NA	G	NA	A	XISHI 15::[B134]	B134		subtrop	1	C	T	T	-	-	-	C	C	C	T	C	-	-	-	-	C	-	G	C	T	T	-	A	-	G	G	C	T	T
B138	NA	C	NA	NA	T	NA	NA	G	NA	C	NA	NA	G	NA	A	GU 154::[B138]	B138		indx	1.5	C	T	T	-	-	-	C	C	C	T	C	-	-	-	-	C	-	G	C	T	T	-	A	-	G	G	C	T	T
B140	NA	C	NA	NA	T	NA	NA	G	NA	C	NA	NA	G	NA	A	PEI C122::[B140]	B140		ind1A	5	C	T	T	-	-	-	C	C	C	T	C	-	-	-	-	C	-	G	C	T	T	-	A	-	G	G	C	T	T
B142	NA	C	NA	NA	T	NA	NA	G	NA	C	NA	NA	G	NA	A	NINGHUI 21::[B142]	B142		admix	0	C	T	T	-	-	-	C	C	C	T	C	-	-	-	-	C	-	G	C	T	T	-	A	-	G	G	C	T	T
B144	NA	C	NA	NA	T	NA	NA	G	NA	C	NA	NA	G	NA	A	HUHUI 628::[B144]	B144		japx	1	C	T	T	-	-	-	C	C	C	T	C	-	-	-	-	C	-	G	C	T	T	-	A	-	G	G	C	T	T
B150	NA	C	NA	NA	T	NA	NA	G	NA	C	NA	NA	G	NA	A	L 301B::[B150]	B150		ind1A	12	C	T	T	-	-	-	C	C	C	T	C	-	-	-	-	C	-	G	C	T	T	-	A	-	G	G	C	T	T
B154	NA	C	NA	NA	T	NA	NA	G	NA	C	NA	NA	G	NA	A	LIMING B::[B154]	B154		temp	1	C	T	T	-	-	-	C	C	C	T	C	-	-	-	-	C	-	G	C	T	T	-			G	G	C	T	T
B157	NA	C	NA	NA	T	NA	NA	G	NA	C	NA	NA	G	NA	A	88B::[B157]	B157		ind1A	12	C	T	T	-	-	-	C	C	C	T	C	-	-	-	-	C	-	G	C	T	T	-	A	-	G	G	C	T	T
B158	NA	C	NA	NA	T	NA	NA	G	NA	C	NA	NA	G	NA	A	TAIZHONG 65/TAIZHONGHR539::[B158]	B158		admix	10	C	T	T	-	-	-	C	C	C	T	C	-	-	-	-	C	-	G	C	T	T	-	A	-	G	G	C	T	T
B160	NA	C	NA	NA	T	NA	NA	G	NA	C	NA	NA	G	NA	A	SHUIYUAN 300LI::[B160]	B160		temp	0	C	T	T	-	-	-	C	C	C	T	C	-	-	-	-	C	-	G	C	T	T	-	A	-	G	G	C	T	T
B162	NA	C	NA	NA	T	NA	NA	G	NA	C	NA	NA	G	NA	A	BAIGEDAO::[B162]	B162		temp	0	C	T	T	-	-	-	C	C	C	T	C	-	-	-	-	C	-	G	C	T	T	-	A	-	G	G	C	T	T
B168	NA	C	NA	NA	T	NA	NA	G	NA	C	NA	NA	G	NA	A	ZHUYUAN::[B168]	B168	IRGC 136096	temp	0	C	T	T	-	-	-	C	C	C	T	C	-	-	-	-	C	-	G	C	T	T	-	A	-	G	G	C	T	T
B169	NA	C	NA	NA	T	NA	NA	G	NA	C	NA	NA	G	NA	A	AILUYU::[B169]	B169		temp	1	C	T	T	-	-	-	C	C	C	T	C	-	-	-	-	C	-	G	C	T	T	-	A	-	G	G	C	T	T
B170	NA	C	NA	NA	T	NA	NA	G	NA	C	NA	NA	G	NA	A	HONGSE 90::[B170]	B170	IRGC 135905	temp	0	C	T	T	-	-	-	C	C	C	T	C	-	-	-	-	C	-	G	C	T	T	-	A	-	G	G	C	T	T
B171	NA	C	NA	NA	T	NA	NA	G	NA	C	NA	NA	G	NA	A	LINGUO::[B171]	B171	IRGC 135974	temp	1	C	T	T	-	-	-	C	C	C	T	C	-	-	-	-	C	-	G	C	T	T	-	A	-	G	G	C	T	T
B173	NA	C	NA	NA	T	NA	NA	G	NA	C	NA	NA	G	NA	A	TJANTAJAN::[B173]	B173	IRGC 136056	admix	13	C	T	T	-	-	-	C	C	C	T	C	-	-	-	-	A	A	G	C	T	T	-	A	-	G	G	C	T	T
B179	NA	C	NA	NA	T	NA	NA	G	NA	C	NA	NA	G	NA	A	KELUODUO B::[B179]	B179	IRGC 135966	temp	1	C	T	T	-	-	-	C	C	C	T	C	-	-	-	-	C	-	G	C	T	T	-	A	-	G	G	C	T	T
B181	NA	C	NA	NA	T	NA	NA	G	NA	C	NA	NA	G	NA	A	71011::[B181]	B181	IRGC 135816	ind1A	3	C	T	T	-	-	-	C	C	C	T	C	-	-	-	-	C	-	G	C	T	T	-	A	-	G	G	C	T	T
B182	NA	C	NA	NA	T	NA	NA	G	NA	C	NA	NA	G	NA	A	CHIMAO::[B182]	B182		temp	1	C	T	T	-	-	-	C	C	C	T	C	-	-	-	-	C	-	G	C	T	T	-	A	-	G	G	C	T	T
B183	NA	C	NA	NA	T	NA	NA	G	NA	C	NA	NA	G	NA	A	QINGNUO KYOHATAMOCHI::[B183]	B183	IRGC 136030	temp	0	C	T	T	-	-	-	C	C	C	T	C	-	-	-	-	C	-	G	C	T	T	-	A	-	G	G	C	T	T
B185	NA	C	NA	NA	T	NA	NA	G	NA	C	NA	NA	G	NA	A	SLK 2-18-2::[B185]	B185	IRGC 136048	indx	3	C	T	T	-	-	-	C	C	C	T	C	-	-	-	-	C	-	G	C	T	T	-	A	-	G	G	C	T	T
B188	NA	C	NA	NA	T	NA	NA	G	NA	C	NA	NA	G	NA	A	IRAT 36::[B188]	B188	IRGC 135944	trop	0	C	T	T	-	-	-	C	C	C	T	C	-	-	-	-	C	-	G	C	T	T	-	A	-	G	G	C	T	T
B189	NA	C	NA	NA	T	NA	NA	G	NA	C	NA	NA	G	NA	A	IRAT 669::[B189]	B189	IRGC 135945	trop	1	C	T	T	-	-	-	C	C	C	T	C	-	-	-	-	C	-	G	C	T	T	-	A	-	G	G	C	T	T
B190	NA	C	NA	NA	T	NA	NA	G	NA	C	NA	NA	G	NA	A	ITA 221::[B190]	B190		trop	16	C	T	T	-	-	-	C	C	C	T	C	-	-	-	-	A	A	G	C	T	T	-	A	-	G	G	C	T	T
B191	NA	C	NA	NA	T	NA	NA	G	NA	C	NA	NA	G	NA	A	80A60YR71009-1-5::[B191]	B191	IRGC 135818	trop	1	C	T	T	-	-	-	C	C	C	T	C	-	-	-	-	C	-	G	C	T	T	-	A	-	G	G	C	T	T
B192	NA	C	NA	NA	T	NA	NA	G	NA	C	NA	NA	G	NA	A	R42::[B192]	B192	IRGC 136033	admix	0	C	T	T	-	-	-	C	C	C	T	C	-	-	-	-	C	-	G	C	T	T	-	A	-	G	G	C	T	T
B196	NA	C	NA	NA	T	NA	NA	G	NA	C	NA	NA	G	NA	A	TAIDONGLUDAO::[B196]	B196		trop	1	C	T	T	-	-	-	C	C	C	T	C	-	-	-	-	C	-	G	C	T	T	-	A	-	G	G	C	T	T
B201	NA	C	NA	NA	T	NA	NA	G	NA	C	NA	NA	G	NA	A	CHENGNONGSHUIJING::[B201]	B201		ind1B	0	C	T	T	-	-	-	C	C	C	T	C	-	-	-	-	C	-	G	C	T	T	-	A	-	G	G	C	T	T
B204	NA	C	NA	NA	T	NA	NA	G	NA	C	NA	NA	G	NA	A	LONGHUAMAOHU::[B204]	B204		temp	0	C	T	T	-	-	-	C	C	C	T	C	-	-	-	-	C	-	G	C	T	T	-	A	-	G	G	C	T	T
B205	NA	C	NA	NA	T	NA	NA	G	NA	C	NA	NA	G	NA	A	CUNSANLI::[B205]	B205		japx	1	C	T	T	-	-	-	C	C	C	T	C	-	-	-	-	C	-	G	C	T	T	-	A	-	G	G	C	T	T
B208	NA	C	NA	NA	T	NA	NA	G	NA	C	NA	NA	G	NA	A	LUCAIHAO::[B208]	B208		ind1A	13	C	T	T	-	-	-	C	C	C	T	C	-	-	-	-	C	-	G	C	T	T	-	A	-	G	G	C	T	T
B210	NA	C	NA	NA	T	NA	NA	G	NA	C	NA	NA	G	NA	A	NANXIONGZAOYOUZHAN::[B210]	B210		ind1A	24	C	T	T	-	-	-	C	C	C	T	C	-	-	-	-	A	A	G	C	T	T	-	A	-	G	G	C	T	T
B215	NA	C	NA	NA	T	NA	NA	G	NA	C	NA	NA	G	NA	A	HONGQI 5::[B215]	B215	IRGC 135904	temp	2	C	T	T	-	-	-	C	C	C	T	C	-	-	-	-	C	-	G	C	T	T	-	A	-	G	G	C	T	T
B222	NA	C	NA	NA	T	NA	NA	G	NA	C	NA	NA	G	NA	A	BEIZINUO::[B222]	B222		ind1A	4	C	T	T	-	-	-	C	C	C	T	C	-	-	-	-	C	-	G	C	T	T	-	A	-	G	G	C	T	T
B224	NA	C	NA	NA	T	NA	NA	G	NA	C	NA	NA	G	NA	A	YOUNIAN::[B224]	B224		ind1A	21	C	T	T	-	-	-	C	C	C	T	C	-	-	-	-	A	A	G	C	T	T	-	A	-	G	G	C	T	T
B226	NA	C	NA	NA	T	NA	NA	G	NA	C	NA	NA	G	NA	A	HEIMANGDAO::[B226]	B226		temp	0	C	T	T	-	-	-	C	C	C	T	C	-	-	-	-	C	-	G	C	T	T	-	A	-	G	G	C	T	T
B228	NA	C	NA	NA	T	NA	NA	G	NA	C	NA	NA	G	NA	A	HAOBAYONG 1::[B228]	B228		japx	2.5	C	T	T	-	-	-	C	C	C	T	C	-	-	-	-	C	-	G	C	T	T	-	A	-	G	G	C	T	T
B230	NA	C	NA	NA	T	NA	NA	G	NA	C	NA	NA	G	NA	A	BANJIEMANG2::[B230]	B230		japx	19	C	T	T	-	-	-	C	C	C	T	C	-	-	-	-	A	A	G	C	T	T	-	A	-	G	G	C	T	T
B234	NA	C	NA	NA	T	NA	NA	G	NA	C	NA	NA	G	NA	A	AITUOGU 151::[B234]	B234		ind1A	13	C	T	T	-	-	-	C	C	C	T	C	-	-	-	-	C	-	G	C	T	T	-	A	-	G	G	C	T	T
B235	NA	C	NA	NA	T	NA	NA	G	NA	C	NA	NA	G	NA	A	ZHONGHUA 8::[B235]	B235		temp	0	C	T	T	-	-	-	C	C	C	T	C	-	-	-	-	C	-	G	C	T	T	-	A	-	G	G	C	T	T
B236	NA	C	NA	NA	T	NA	NA	G	NA	C	NA	NA	G	NA	A	JINDAO 1::[B236]	B236	IRGC 135957	temp	0	C	T	T	-	-	-	C	C	C	T	C	-	-	-	-	C	-	G	C	T	T	-	A	-	G	G	C	T	T
B240	NA	C	NA	NA	T	NA	NA	G	NA	C	NA	NA	G	NA	A	ZHENGDAO 5::[B240]	B240		temp	0	C	T	T	-	-	-	C	C	C	T	C	-	-	-	-	C	-	G	C	T	T	-	A	-	G	G	C	T	T
B241	NA	C	NA	NA	T	NA	NA	G	NA	C	NA	NA	G	NA	A	LAMUJIA::[B241]	B241		subtrop	1	C	T	T	-	-	-	C	C	C	T	C	-	-	-	-	C	-	G	C	T	T	-	A	-	G	G	C	T	T
B242	NA	C	NA	NA	T	NA	NA	G	NA	C	NA	NA	G	NA	A	GUI 630::[B242]	B242		indx	0	C	T	T	-	-	-	C	C	C	T	C	-	-	-	-	C	-	G	C	T	T	-	A	-	G	G	C	T	T
B244	NA	C	NA	NA	T	NA	NA	G	NA	C	NA	NA	G	NA	A	XIANGDAO::[B244]	B244		ind1A	5	C	T	T	-	-	-	C	C	C	T	C	-	-	-	-	C	-	G	C	T	T	-	A	-	G	G	C	T	T
B245	NA	C	NA	NA	T	NA	NA	G	NA	C	NA	NA	G	NA	A	SHANJIUGU::[B245]	B245		subtrop	1	C	T	T	-	-	-	C	C	C	T	C	-	-	-	-	C	-	G	C	T	T	-	A	-	G	G	C	T	T
B246	NA	C	NA	NA	T	NA	NA	G	NA	C	NA	NA	G	NA	A	LAOZAOGU::[B246]	B246		indx	17	C	T	T	-	-	-	C	C	C	T	C	-	-	-	-	A	A	G	C	T	T	-	A	-	G	G	C	T	T
B248	NA	C	NA	NA	T	NA	NA	G	NA	C	NA	NA	G	NA	A	ZHUZHEN B::[B248]	B248		ind1A	4	C	T	T	-	-	-	C	C	C	T	C	-	-	-	-	C	-	G	C	T	T	-	A	-	G	G	C	T	T
B249	NA	C	NA	NA	T	NA	NA	G	NA	C	NA	NA	G	NA	A	CHAOYANGYIHAO B::[B249]	B249		ind1A	12	C	T	T	-	-	-	C	C	C	T	C	-	-	-	-	C	-	G	C	T	T	-	A	-	G	G	C	T	T
B250	NA	C	NA	NA	T	NA	NA	G	NA	C	NA	NA	G	NA	A	ANNONGWANGENG B::[B250]	B250		temp	2	C	T	T	-	-	-	C	C	C	T	C	-	-	-	-	C	-	G	C	T	T	-	A	-	G	G	C	T	T
B253	NA	C	NA	NA	T	NA	NA	G	NA	C	NA	NA	G	NA	A	JIANGNONGZAO 1 B::[B253]	B253		indx	13	C	T	T	-	-	-	C	C	C	T	C	-	-	-	-	C	-	G	C	T	T	-	A	-	G	G	C	T	T
B254	NA	C	NA	NA	T	NA	NA	G	NA	C	NA	NA	G	NA	A	JINGHU3 B::[B254]	B254		indx	13	C	T	T	-	-	-	C	C	C	T	C	-	-	-	-	C	-	G	C	T	T	-	A	-	G	G	C	T	T
B258	NA	C	NA	NA	T	NA	NA	G	NA	C	NA	NA	G	NA	A	XINGGUO::[B258]	B258		temp	0	C	T	T	-	-	-	C	C	C	T	C	-	-	-	-	C	-	G	C	T	T	-	A	-	G	G	C	T	T
B260	NA	C	NA	NA	T	NA	NA	G	NA	C	NA	NA	G	NA	A	MAMAGU::[B260]	B260		ind1A	9	C	T	T	-	-	-	C	C	C	T	C	-	-	-	-	C	-	G	C	T	T	-	A	-	G	G	C	T	T
B263	NA	C	NA	NA	T	NA	NA	G	NA	C	NA	NA	G	NA	A	WEIGUO::[B263]	B263		temp	1	C	T	T	-	-	-	C	C	C	T	C	-	-	-	-	C	-	G	C	T	T	-	A	-	G	G	C	T	T
B264	NA	C	NA	NA	T	NA	NA	G	NA	C	NA	NA	G	NA	A	SANBAILI::[B264]	B264		ind1A	13	C	T	T	-	-	-	C	C	C	T	C	-	-	-	-	C	-	G	C	T	T	-	A	-	G	G	C	T	T
B266	NA	C	NA	NA	T	NA	NA	G	NA	C	NA	NA	G	NA	A	HAOMAKE (K)::[B266]	B266		subtrop	23.5	C	T	T	-	-	-	C	C	C	T	C	-	-	-	-	A	A	G	C	T	T	-	A	-	G	G	C	T	T
B268	NA	C	NA	NA	T	NA	NA	G	NA	C	NA	NA	G	NA	C	NANGAOGU::[B268]	B268		indx	19	C	T	T	-	-	-	C	C	C	T	C	-	-	-	-	A	A	G	C	T	T	-	A	-	G	G	C	T	T
B269	NA	C	NA	NA	T	NA	NA	G	NA	C	NA	NA	G	NA	A	YUEFU::[B269]	B269	IRGC 136083	temp	0	C	T	T	-	-	-	C	C	C	T	C	-	-	-	-	C	-	G	C	T	T	-	A	-	G	G	C	T	T
CX10	NA	C	NA	NA	T	NA	NA	G	NA	C	NA	NA	G	NA	A	GANG 46B::[CX10]	CX10	IRGC 135890	ind1A	13	C	T	T	-	-	-	C	C	C	T	C	-	-	-	-	C	-	G	C	T	T	-	A	-	G	G	C	T	T
CX100	NA	C	NA	NA	T	NA	NA	G	NA	C	NA	NA	G	NA	A	PALUNG 2::[CX100]	CX100	IRGC 136020	ind1B	1	C	T	T	-	-	-	C	C	C	T	C	-	-	-	-	C	-	G	C	T	T	-	A	-	G	G	C	T	T
CX101	NA	C	NA	NA	T	NA	NA	G	NA	C	NA	NA	G	NA	A	HEI MI CHAN::[CX101]	CX101	IRGC 135902	ind1A	13	C	T	T	-	-	-	C	C	C	T	C	-	-	-	-	C	-	G	C	T	T	-	A	-	G	G	C	T	T
CX106	NA	C	NA	NA	T	NA	NA	G	NA	C	NA	NA	G	NA	A	SAL BUI BAO::[CX106]	CX106	IRGC 136040	trop	7.5	C	T	T	-	-	-	C	C	C	T	C	-	-	-	-	C	-/A	G	C	T	T	-/A	A	-/A	G	G	C	T	T
CX109	NA	C	NA	NA	T	NA	NA	G	NA	C	NA	NA	G	NA	A	DACCA6::[CX109]	CX109	IRGC 135876	japx	24	C	T	T	-	-	-	C	C	C	T	C	-	-	-	-	A	A	G	C	T	T	-	A	-	G	G	C	T	T
CX11	NA	C	NA	NA	T	NA	NA	G	NA	C	NA	NA	G	NA	A	GUMEI 2::[CX11]	CX11		japx	0	C	T	T	-	-	-	C	C	C	T	C	-	-	-	-	C	-	G	C	T	T	-	A	-	G	G	C	T	T
CX111	NA	C	NA	NA	T	NA	NA	G	NA	C	NA	NA	G	NA	A	GIZA14::[CX111]	CX111	IRGC 135894	trop	0	C	T	T	-	-	-	C	C	C	T	C	-	-	-	-	C	-	G	C	T	T	-	A	-	G	G	C	T	T
CX113	NA	C	NA	NA	T	NA	NA	G	NA	C	NA	NA	G	NA	A	BINIAPAN::[CX113]	CX113	IRGC 135846	trop	1	C	T	T	-	-	-	C	C	C	T	C	-	-	-	-	C	-	G	C	T	T	-	A	-	G	G	C	T	T
CX115	NA	C	NA	NA	T	NA	NA	G	NA	C	NA	NA	G	NA	A	YUN HUI 72::[CX115]	CX115		indx	1	C	T	T	-	-	-	C	C	C	T	C	-	-	-	-	C	-	G	C	T	T	-	A	-	G	G	C	T	T
CX116	NA	C	NA	NA	T	NA	NA	G	NA	C	NA	NA	G	NA	A	WUDADAOZHONG::[CX116]	CX116	IRGC 136070	temp	0	C	T	T	-	-	-	C	C	C	T	C	-	-	-	-	C	-	G	C	T	T	-	A	-	G	G	C	T	T
CX117	NA	C	NA	NA	T	NA	NA	G	NA	C	NA	NA	G	NA	A	IR65600-27-1-2-2::[CX117]	CX117	IRGC 135930	indx	5	C	T	T	-	-	-	C	C	C	T	C	-	-	-	-	C	-	G	C	T	T	-	A	-	G	G	C	T	T
CX125	NA	C	NA	NA	T	NA	NA	G	NA	C	NA	NA	G	NA	A	CAOZHAO-2::[CX125]	CX125		ind1B	23	C	T	T	-	-	-	C	C	C	T	C	-	-	-	-	A	A	G	C	T	T	-	A	-	G	G	C	T	T
CX129	NA	C	NA	NA	T	NA	NA	G	NA	C	NA	NA	G	NA	A	MOLOK::[CX129]	CX129	IRGC 135986	trop	0	C	T	T	-	-	-	C	C	C	T	C	-	-	-	-	C	-	G	C	T	T	-	A	-	G	G	C	T	T
CX130	NA	C	NA	NA	T	NA	NA	G	NA	C	NA	NA	G	NA	A	CHIPDA::[CX130]	CX130	IRGC 135864	ind2	20	C	T	T	-	-	-	C	C	C	T	C	-	-	-	-	A	A	G	C	T	T	-	A	-	G	G	C	T	T
CX131	NA	C	NA	NA	T	NA	NA	G	NA	C	NA	NA	G	NA	A	ZALE::[CX131]	CX131	IRGC 136087	ind1A	5	C	T	T	-	-	-	C	C	C	T	C	-	-	-	-	C	-	G	C	T	T	-	A	-	G	G	C	T	T
CX132	NA	C	NA	NA	T	NA	NA	G	NA	C	NA	NA	G	NA	A	AP423::[CX132]	CX132	IRGC 135830	trop	0	C	T	T	-	-	-	C	C	C	T	C	-	-	-	-	C	-	G	C	T	T	-	A	-	G	G	C	T	T
CX133	NA	C	NA	NA	T	NA	NA	G	NA	C	NA	NA	G	NA	A	ZHENGSHAN97::[CX133]	CX133		ind1A	5	C	T	T	-	-	-	C	C	C	T	C	-	-	-	-	C	-	G	C	T	T	-	A	-	G	G	C	T	T
CX139	NA	C	NA	NA	T	NA	NA	G	NA	C	NA	NA	G	NA	A	AMARELES::[CX139]	CX139	IRGC 135826	japx	16	C	T	T	-	-	-	C	C	C	T	C	-	-	-	-	A	A	G	C	T	T	-	A	-	G	G	C	T	T
CX14	NA	C	NA	NA	T	NA	NA	G	NA	C	NA	NA	G	NA	A	CHENNONG 265::[CX14]	CX14		temp	0	C	T	T	-	-	-	C	C	C	T	C	-	-	-	-	C	-	G	C	T	T	-	A	-	G	G	C	T	T
CX140	NA	C	NA	NA	T	NA	NA	G	NA	C	NA	NA	G	NA	A	NIPPONBARE::[CX140]	CX140	IRGC 136196	temp	0	C	T	T	-	-	-	C	C	C	T	C	-	-	-	-	C	-	G	C	T	T	-	A	-	G	G	C	T	T
CX142	NA	C	NA	NA	T	NA	NA	G	NA	C	NA	NA	G	NA	A	AI YEH LU::[CX142]	CX142	IRGC 135823	japx	0	C	T	T	-	-	-	C	C	C	T	C	-	-	-	-	C	-	G	C	T	T	-	A	-	G	G	C	T	T
CX143	NA	C	NA	NA	T	NA	NA	G	NA	C	NA	NA	G	NA	A	KHASAR::[CX143]	CX143	IRGC 135968	aro	18	C	T	T	-	-	-	C	C	C	T						C	-	G	C	T	T	-	A	-	G	G	C	T	T
CX145	NA	C	NA	NA	T	NA	NA	G	NA	C	NA	NA	G	NA	A	MINGHUI 63::[CX145]	CX145	IRGC 117271	indx	1	C	T	T	-	-	-	C	C	C	T	C	-	-	-	-	C	-	G	C	T	T	-	A	-	G	G	C	T	T
CX15	NA	C	NA	NA	T	NA	NA	G	NA	C	NA	NA	G	NA	A	Y134::[CX15]	CX15	IRGC 136077	ind1B	0	C	T	T	-	-	-	C	C	C	T	C	-	-	-	-	C	-	G	C	T	T	-	A	-	G	G	C	T	T
CX155	NA	C	NA	NA	T	NA	NA	G	NA	C	NA	NA	G	NA	A	MADHUKAR::[CX155]	CX155	IRGC 135979	ind2	24	C	T	T	-	-	-	C	C	C	T	C	-	-	-	-	A	A	G	C	T	T	-	A	-	G	G	C	T	T
CX16	NA	C	NA	NA	T	NA	NA	G	NA	C	NA	NA	G	NA	A	YUAN JING 7::[CX16]	CX16		temp	0	C	T	T	-	-	-	C	C	C	T	C	-	-	-	-	C	-	G	C	T	T	-	A	-	G	G	C	T	T
CX160	NA	C	NA	NA	T	NA	NA	G	NA	C	NA	NA	G	NA	A	W1263::[CX160]	CX160	IRGC 136066	ind2	15.5	C	T	T	-	-	-	C	C	C	T	C	-	-	-	-	C	-	G	C	T	T	-	A	-	G	G	C	T	T
CX18	NA	C	NA	NA	T	NA	NA	G	NA	C	NA	NA	G	NA	A	ZAOXIAN 14::[CX18]	CX18	IRGC 136089	ind1A	12	C	T	T	-	-	-	C	C	C	T	C	-	-	-	-	C	-	G	C	T	T	-	A	-	G	G	C	T	T
CX205	NA	C	NA	NA	T	NA	NA	G	NA	C	NA	NA	G	NA	A	IR69428-6-1-1-3-3::[CX205]	CX205	IRGC 135935	japx	15	C	T	T	-	-	-	C	C	C	T	C	-	-	-	-	A	A	G	C	T	T	-	A	-	G	G	C	T	T
CX207	NA	C	NA	NA	T	NA	NA	G	NA	C	NA	NA	G	NA	A	GAOZI::[CX207]	CX207		indx	4	C	T	T	-	-	-	C	C	C	T	C	-	-	-	-	C	-	G	C	T	T	-	A	-	G	G	C	T	T
CX211	NA	C	NA	NA	T	NA	NA	G	NA	C	NA	NA	G	NA	A	M3122::[CX211]	CX211		temp	0	C	T	T	-	-	-	C	C	C	T	C	-	-	-	-	C	-	G	C	T	T	-	A	-	G	G	C	T	T
CX212	NA	C	NA	NA	T	NA	NA	G	NA	C	NA	NA	G	NA	A	NONGKEN 58::[CX212]	CX212	IRGC 136009	temp	1	C	T	T	-	-	-	C	C	C	T	C	-	-	-	-	C	-	G	C	T	T	-	A	-	G	G	C	T	T
CX213	NA	C	NA	NA	T	NA	NA	G	NA	C	NA	NA	G	NA	A	CHENNONG 89366::[CX213]	CX213		temp	2.5	C	T	T	-	-	-	C	C	C	T	C	-	-	-	-	C	-/A	G	C	T	T	-/A	A	-/A	G	G	C	T	T
CX214	NA	C	NA	NA	T	NA	NA	G	NA	C	NA	NA	G	NA	A	BRAZIL NUODAO::[CX214]	CX214	IRGC 135849	trop	0	C	T	T	-	-	-	C	C	C	T	C	-	-	-	-	C	-	G	C	T	T	-	A	-	G	G	C	T	T
CX220	NA	C	NA	NA	T	NA	NA	G	NA	C	NA	NA	G	NA	A	IRAT109::[CX220]	CX220	IRGC 135941	trop	0	C	T	T	-	-	-	C	C	C	T	C	-	-	-	-	C	-	G	C	T	T	-	A	-	G	G	C	T	T
CX228	NA	C	NA	NA	T	NA	NA	G	NA	C	NA	NA	G	NA	A	BALA::[CX228]	CX228	IRGC 135836	indx	13	C	T	T	-	-	-	C	C	C	T	C	-	-	-	-	C	-	G	C	T	T	-	A	-	G	G	C	T	T
CX236	NA	C	NA	NA	T	NA	NA	G	NA	C	NA	NA	G	NA	A	VANDANA::[CX236]	CX236	IRGC 117598	indx	12	C	T	T	-	-	-	C	C	C	T	C	-	-	-	-	C	-	G	C	T	T	-	A	-	G	G	C	T	T
CX238	NA	C	NA	NA	T	NA	NA	G	NA	C	NA	NA	G	NA	A	BW311-9::[CX238]	CX238	IRGC 135854	ind1B	12	C	T	T	-	-	-	C	C	C	T	C	-	-	-	-	C	-	G	C	T	T	-	A	-	G	G	C	T	T
CX241	NA	C	NA	NA	T	NA	NA	G	NA	C	NA	NA	G	NA	A	IAC47::[CX241]	CX241	IRGC 135913	trop	15	C	T	T	-	-	-	C	C	C	T	C	-	-	-	-	C	-	G	C	T	T	-	A	-	G	G	C	T	T
CX248	NA	C	NA	NA	T	NA	NA	G	NA	C	NA	NA	G	NA	A	KINANDANGPATONG::[CX248]	CX248	IRGC 135970	trop	0	C	T	T	-	-	-	C	C	C	T	C	-	-	-	-	C	-	G	C	T	T	-	A	-	G	G	C	T	T
CX249	NA	C	NA	NA	T	NA	NA	G	NA	C	NA	NA	G	NA	A	2004::[CX249]	CX249	IRGC 135814	ind1B	0.5	C	T	T	-	-	-	C	C	C	T	C	-	-	-	-	C	-	G	C	T	T	-	A	-	G	G	C	T	T
CX251	NA	C	NA	NA	T	NA	NA	G	NA	C	NA	NA	G	NA	A	XUDAO 4::[CX251]	CX251		temp	0	C	T	T	-	-	-	C	C	C	T	C	-	-	-	-	C	-	G	C	T	T	-	A	-	G	G	C	T	T
CX262	NA	C	NA	NA	T	NA	NA	G	NA	C	NA	NA	G	NA	A	IAC3::[CX262]	CX262	IRGC 135912	trop	1	C	T	T	-	-	-	C	C	C	T	C	-	-	-	-	C	-	G	C	T	T	-	A	-	G	G	C	T	T
CX263	NA	C	NA	NA	T	NA	NA	G	NA	C	NA	NA	G	NA	A	PADISENEMOK::[CX263]	CX263	IRGC 136018	indx	13	C	T	T	-	-	-	C	C	C	T	C	-	-	-	-	C	-	G	C	T	T	-	A	-	G	G	C	T	T
CX265	NA	C	NA	NA	T	NA	NA	G	NA	C	NA	NA	G	NA	A	MONOLAYA::[CX265]	CX265	IRGC 135988	indx	13	C	T	T	-	-	-	C	C	C	T	C	-	-	-	-	C	-	G	C	T	T	-	A	-	G	G	C	T	T
CX266	NA	C	NA	NA	T	NA	NA	G	NA	C	NA	NA	G	NA	A	DINORADO::[CX266]	CX266	IRGC 135880	trop	15	C	T	T	-	-	-	C	C	C	T	C	-	-	-	-	A	A	G	C	T	T	-	A	-	G	G	C	T	T
CX268	NA	C	NA	NA	T	NA	NA	G	NA	C	NA	NA	G	NA	A	ARROZVERMELHO::[CX268]	CX268	IRGC 135831	indx	5	C	T	T	-	-	-	C	C	C	T	C	-	-	-	-	C	-	G	C	T	T	-	A	-	G	G	C	T	T
CX269	NA	C	NA	NA	T	NA	NA	G	NA	C	NA	NA	G	NA	A	IAC165::[CX269]	CX269	IRGC 135911	trop	24	C	T	T	-	-	-	C	C	C	T	C	-	-	-	-	A	A	G	C	T	T	-	A	-	G	G	C	T	T
CX270	NA	C	NA	NA	T	NA	NA	G	NA	C	NA	NA	G	NA	A	TAICHUNGNATIVE1::[CX270]	CX270		ind1A	4	C	T	T	-	-	-	C	C	C	T	C	-	-	-	-	C	-	G	C	T	T	-	A	-	G	G	C	T	T
CX28	NA	C	NA	NA	T	NA	NA	G	NA	C	NA	NA	G	NA	A	GAYABYEO::[CX28]	CX28	IRGC 135892	ind1B	1	C	T	T	-	-	-	C	C	C	T	C	-	-	-	-	C	-	G	C	T	T	-	A	-	G	G	C	T	T
CX281	NA	C	NA	NA	T	NA	NA	G	NA	C	NA	NA	G	NA	A	IR68897B::[CX281]	CX281	IRGC 135934	ind1B	16	C	T	T	-	-	-	C	C	C	T	C	-	-	-	-	C	-	G	C	T	T	-	A	-	G	G	C	T	T
CX285	NA	C	NA	NA	T	NA	NA	G	NA	C	NA	NA	G	NA	A	NONGLINNUO::[CX285]	CX285	IRGC 136010	trop	1	C	T	T	-	-	-	C	C	C	T	C	-	-	-	-	C	-	G	C	T	T	-	A	-	G	G	C	T	T
CX286	NA	C	NA	NA	T	NA	NA	G	NA	C	NA	NA	G	NA	A	C349::[CX286]	CX286		admix	0	C	T	T	-	-	-	C	C	C	T	C	-	-	-	-	C	-	G	C	T	T	-	A	-	G	G	C	T	T
CX287	NA	C	NA	NA	T	NA	NA	G	NA	C	NA	NA	G	NA	A	C52::[CX287]	CX287		temp	1	C	T	T	-	-	-	C	C	C	T	C	-	-	-	-	C	-	G	C	T	T	-	A	-	G	G	C	T	T
CX29	NA	C	NA	NA	T	NA	NA	G	NA	C	NA	NA	G	NA	A	MILYANG23::[CX29]	CX29	IRGC 135984	admix	4	C	T	T	-	-	-	C	C	C	T	C	-	-	-	-	C	-	G	C	T	T	-	A	-	G	G	C	T	T
CX291	NA	C	NA	NA	T	NA	NA	G	NA	C	NA	NA	G	NA	A	D15::[CX291]	CX291	IRGC 135875	indx	1	C	T	T	-	-	-	C	C	C	T	C	-	-	-	-	C	-	G	C	T	T	-	A	-	G	G	C	T	T
CX296	NA	C	NA	NA	T	NA	NA	G	NA	C	NA	NA	G	NA	A	IR74::[CX296]	CX296	IRGC 135937	indx	13	C	T	T	-	-	-	C	C	C	T	C	-	-	-	-	C	-	G	C	T	T	-	A	-	G	G	C	T	T
CX3	NA	C	NA	NA	T	NA	NA	G	NA	C	NA	NA	G	NA	A	BR24::[CX3]	CX3	IRGC 117623	ind1A	13	C	T	T	-	-	-	C	C	C	T	C	-	-	-	-	C	-	G	C	T	T	-	A	-	G	G	C	T	T
CX306	NA	C	NA	NA	T	NA	NA	G	NA	C	NA	NA	G	NA	A	MONGOLIA RICE::[CX306]	CX306	IRGC 135987	temp	1	C	T	T	-	-	-	C	C	C	T	C	-	-	-	-	C	-	G	C	T	T	-	A	-	G	G	C	T	T
CX307	NA	C	NA	NA	T	NA	NA	G	NA	C	NA	NA	G	NA	A	HP121::[CX307]	CX307		japx	1	C	T	T	-	-	-	C	C	C	T	C	-	-	-	-	C	-	G	C	T	T	-	A	-	G	G	C	T	T
CX313	NA	C	NA	NA	T	NA	NA	G	NA	C	NA	NA	G	NA	A	R106::[CX313]	CX313		indx	1	C	T	T	-	-	-	C	C	C	T	C	-	-	-	-	C	-	G	C	T	T	-	A	-	G	G	C	T	T
CX315	NA	C	NA	NA	T	NA	NA	G	NA	C	NA	NA	G	NA	A	ZIDAO::[CX315]	CX315	IRGC 136097	temp	2	C	T	T	-	-	-	C	C	C	T	C	-	-	-	-	C	-	G	C	T	T	-	A	-	G	G	C	T	T
CX316	NA	C	NA	NA	T	NA	NA	G	NA	C	NA	NA	G	NA	A	MR39::[CX316]	CX316	IRGC 135993	admix	0	C	T	T	-	-	-	C	C	C	T	C	-	-	-	-	C	-	G	C	T	T	-	A	-	G	G	C	T	T
CX317	NA	C	NA	NA	T	NA	NA	G	NA	C	NA	NA	G	NA	A	MR19::[CX317]	CX317	IRGC 135992	temp	0.5	C	T	T	-	-	-	C	C	C	T	C	-	-	-	-	C	-	G	C	T	T	-	A	-	G	G	C	T	T
CX32	NA	C	NA	NA	T	NA	NA	G	NA	C	NA	NA	G	NA	A	MANAUTHUKHA::[CX32]	CX32	IRGC 135980	japx	0	C	T	T	-	-	-	C	C	C	T	C	-	-	-	-	C	-	G	C	T	T	-	A	-	G	G	C	T	T
CX329	NA	C	NA	NA	T	NA	NA	G	NA	C	NA	NA	G	NA	A	JINCHUANYIHAO::[CX329]	CX329	IRGC 135956	temp	0	C	T	T	-	-	-	C	C	C	T	C	-	-	-	-	C	-	G	C	T	T	-	A	-	G	G	C	T	T
CX33	NA	C	NA	NA	T	NA	NA	G	NA	C	NA	NA	G	NA	A	SHWE THWE YIN HYV::[CX33]	CX33	IRGC 136045	ind1B	4	C	T	T	-	-	-	C	C	C	T	C	-	-	-	-	C	-	G	C	T	T	-	A	-	G	G	C	T	T
CX330	NA	C	NA	NA	T	NA	NA	G	NA	C	NA	NA	G	NA	A	YUEGUANG::[CX330]	CX330	IRGC 136084	temp	0	C	T	T	-	-	-	C	C	C	T	C	-	-	-	-	C	-	G	C	T	T	-	A	-	G	G	C	T	T
CX342	NA	C	NA	NA	T	NA	NA	G	NA	C	NA	NA	G	NA	A	WANXIAN 763::[CX342]	CX342	IRGC 136068	indx	1	C	T	T	-	-	-	C	C	C	T	C	-	-	-	-	C	-	G	C	T	T	-	A	-	G	G	C	T	T
CX344	NA	C	NA	NA	T	NA	NA	G	NA	C	NA	NA	G	NA	A	HEXI 41::[CX344]	CX344		temp	1	C	T	T	-	-	-	C	C	C	T	C	-	-	-	-	C	-	G	C	T	T	-	A	-	G	G	C	T	T
CX345	NA	C	NA	NA	T	NA	NA	G	NA	C	NA	NA	G	NA	A	YUNGENG 23::[CX345]	CX345		temp	1	C	T	T	-	-	-	C	C	C	T	C	-	-	-	-	C	-	G	C	T	T	-	A	-	G	G	C	T	T
CX347	NA	C	NA	NA	T	NA	NA	G	NA	C	NA	NA	G	NA	A	SAGCï¼7::[CX347]	CX347	IRGC 136039	indx	15	C	T	T	-	-	-	C	C	C	T	C	-	-	-	-	A	A	G	C	T	T	-	A	-	G	G	C	T	T
CX35	NA	C	NA	NA	T	NA	NA	G	NA	C	NA	NA	G	NA	A	BG 94-1::[CX35]	CX35	IRGC 135843	indx	6.5	C	T	T	-	-	-	C	C	C	T	C	-	-	-	-	C	-	G	C	T	T	-	A	-	G	G	C	T	T
CX352	NA	C	NA	NA	T	NA	NA	G	NA	C	NA	NA	G	NA	A	BD007::[CX352]	CX352	IRGC 135839	trop	0	C	T	T	-	-	-	C	C	C	T	C	-	-	-	-	C	-	G	C	T	T	-	A	-	G	G	C	T	T
CX353	NA	C	NA	NA	T	NA	NA	G	NA	C	NA	NA	G	NA	A	CAU1::[CX353]	CX353	IRGC 135860	japx	1	C	T	T	-	-	-	C	C	C	T	C	-	-	-	-	C	-	G	C	T	T	-	A	-	G	G	C	T	T
CX354	NA	C	NA	NA	T	NA	NA	G	NA	C	NA	NA	G	NA	A	CAU2::[CX354]	CX354	IRGC 135861	japx	20	C	T	T	-	-	-	C	C	C	T	C	-	-	-	-	A	A	G	C	T	T	-	A	-	G	G	C	T	T
CX355	NA	C	NA	NA	T	NA	NA	G	NA	C	NA	NA	G	NA	A	YUNLU 102::[CX355]	CX355	IRGC 136085	trop	1	C	T	T	-	-	-	C	C	C	T	C	-	-	-	-	C	-	G	C	T	T	-	A	-	G	G	C	T	T
CX356	NA	C	NA	NA	T	NA	NA	G	NA	C	NA	NA	G	NA	A	YANDAO 8::[CX356]	CX356		temp	2	C	T	T	-	-	-	C	C	C	T	C	-	-	-	-	C	-	G	C	T	T	-	A	-	G	G	C	T	T
CX359	NA	C	NA	NA	T	NA	NA	G	NA	C	NA	NA	G	NA	A	YUNLU 103::[CX359]	CX359		trop	0	C	T	T	-	-	-	C	C	C	T	C	-	-	-	-	C	-	G	C	T	T	-	A	-	G	G	C	T	T
CX371	NA	C	NA	NA	T	NA	NA	G	NA	C	NA	NA	G	NA	A	NERICA 1::[CX371]	CX371	IRGC 136000	trop	0	C	T	T	-	-	-	C	C	C	T	C	-	-	-	-	C	-	G	C	T	T	-	A	-	G	G	C	T	T
CX372	NA	C	NA	NA	T	NA	NA	G	NA	C	NA	NA	G	NA	A	NERICA 2::[CX372]	CX372	IRGC 136001	trop	0	C	T	T	-	-	-	C	C	C	T	C	-	-	-	-	C	-	G	C	T	T	-	A	-	G	G	C	T	T
CX373	NA	C	NA	NA	T	NA	NA	G	NA	C	NA	NA	G	NA	A	NERICA 8::[CX373]	CX373	IRGC 136002	trop	1	C	T	T	-	-	-	C	C	C	T	C	-	-	-	-	C	-	G	C	T	T	-	A	-	G	G	C	T	T
CX374	NA	C	NA	NA	T	NA	NA	G	NA	C	NA	NA	G	NA	A	NERICA 9::[CX374]	CX374	IRGC 136003	trop	1	C	T	T	-	-	-	C	C	C	T	C	-	-	-	-	C	-	G	C	T	T	-	A	-	G	G	C	T	T
CX383	NA	C	NA	NA	T	NA	NA	G	NA	C	NA	NA	G	NA	A	HONGZA::[CX383]	CX383		temp	0	C	T	T	-	-	-	C	C	C	T	C	-	-	-	-	C	-	G	C	T	T	-	A	-	G	G	C	T	T
CX384	NA	C	NA	NA	T	NA	NA	G	NA	C	NA	NA	G	NA	A	FENGZA::[CX384]	CX384		temp	0	C	T	T	-	-	-	C	C	C	T	C	-	-	-	-	C	-	G	C	T	T	-	A	-	G	G	C	T	T
CX389	NA	C	NA	NA	T	NA	NA	G	NA	C	NA	NA	G	NA	A	JINYUAN 85::[CX389]	CX389	IRGC 135960	temp	0	C	T	T	-	-	-	C	C	C	T	C	-	-	-	-	C	-	G	C	T	T	-	A	-	G	G	C	T	T
CX390	NA	C	NA	NA	T	NA	NA	G	NA	C	NA	NA	G	NA	A/C	YUELIANGGU::[CX390]	CX390		indx	16	C	T	T	-	-	-	C	C	C	T	C	-	-	-	-	C	-	G	C	T	T	-	A	-	G	G	C	T	T
CX391	NA	C	NA	NA	T	NA	NA	G	NA	C	NA	NA	G	NA	A	YJ30::[CX391]	CX391	IRGC 136079	temp	1	C	T	T	-	-	-	C	C	C	T	C	-	-	-	-	C	-	G	C	T	T	-	A	-	G	G	C	T	T
CX396	NA	C	NA	NA	T	NA	NA	G	NA	C	NA	NA	G	NA	A	GUANDONG 194 (SOFT RICE)::[CX396]	CX396	IRGC 135898	temp	0	C	T	T	-	-	-	C	C	C	T	C	-	-	-	-	C	-	G	C	T	T	-	A	-	G	G	C	T	T
CX397	NA	C	NA	NA	T	NA	NA	G	NA	C	NA	NA	G	NA	A	NANGENG 46 (SOFT RICE)::[CX397]	CX397		temp	0	C	T	T	-	-	-	C	C	C	T	C	-	-	-	-	C	-	G	C	T	T	-	A	-	G	G	C	T	T
CX427	NA	C	NA	NA	T	NA	NA	G	NA	C	NA	NA	G	NA	A	CX427::[CX427]	CX427		temp	0	C	T	T	-	-	-	C	C	C	T	C	-	-	-	-	C	-	G	C	T	T	-	A	-	G	G	C	T	T
CX428	NA	C	NA	NA	T	NA	NA	G	NA	C	NA	NA	G	NA	A	CX428::[CX428]	CX428		temp	0	C	T	T	-	-	-	C	C	C	T	C	-	-	-	-	C	-	G	C	T	T	-	A	-	G	G	C	T	T
CX429	NA	C	NA	NA	T	NA	NA	G	NA	C	NA	NA	G	NA	A	CX429::[CX429]	CX429		temp	0	C	T	T	-	-	-	C	C	C	T	C	-	-	-	-	C	-	G	C	T	T	-	A	-	G	G	C	T	T
CX43	NA	C	NA	NA	T	NA	NA	G	NA	C	NA	NA	G	NA	A	IR66897B::[CX43]	CX43	IRGC 135931	ind1B	16	C	T	T	-	-	-	C	C	C	T	C	-	-	-	-	C	-	G	C	T	T	-	A	-	G	G	C	T	T
CX47	NA	C	NA	NA	T	NA	NA	G	NA	C	NA	NA	G	NA	A	DIANGENG::[CX47]	CX47	IRGC 135879	temp	1	C	T	T	-	-	-	C	C	C	T	C	-	-	-	-	C	-	G	C	T	T	-	A	-	G	G	C	T	T
CX50	NA	C	NA	NA	T	NA	NA	G	NA	C	NA	NA	G	NA	A	AI ZI DAO::[CX50]	CX50		ind1B	4	C	T	T	-	-	-	C	C	C	T	C	-	-	-	-	C	-	G	C	T	T	-	A	-	G	G	C	T	T
CX51	NA	C	NA	NA	T	NA	NA	G	NA	C	NA	NA	G	NA	A	BABAOMI::[CX51]	CX51	IRGC 135835	indx	4.5	C	T	T	-	-	-	C	C	C	T	C	-	-	-	-	C	-	G	C	T	T	-	A	-	G	G	C	T	T
[truncated: 1,034 more rows]
[truncated: 613 more columns]

## Sheet: Mo15-23
Mo15.23_Clean
ASSAY ID	Mo15.23_Clean	Chr 12 : 10797768	Genotype vs Phenotype
B001	NA	C/C	NA
B002	NA	C/C	NA
B003	NA	C/C	NA
B004	NA	C/C	NA
B005	NA	C/C	NA
B006	NA	T/T	NA
B007	NA	C/C	NA
B008	NA	C/C	NA
B009	NA	C/C	NA
B010	NA	C/C	NA
B011	NA	NA	NA
B012	NA	NA	NA
B013	NA	NA	NA
B014	NA	C/C	NA
B015	NA	NA	NA
B016	NA	C/C	NA
B017	NA	NA	NA
B018	NA	C/C	NA
B019	NA	T/T	NA
B020	NA	C/C	NA
B021	NA	NA	NA
B023	NA	C/C	NA
B024	NA	C/C	NA
B025	NA	C/C	NA
B026	NA	NA	NA
B027	NA	T/T	NA
B028	NA	C/T	NA
B029	NA	C/C	NA
B030	NA	NA	NA
B031	NA	NA	NA
B032	NA	T/T	NA
B033	NA	C/C	NA
B034	NA	C/C	NA
B035	NA	C/C	NA
B036	NA	C/C	NA
B037	NA	C/C	NA
B038	NA	C/C	NA
B039	NA	C/T	NA
B040	NA	NA	NA
B043	NA	C/C	NA
B044	NA	C/C	NA
B045	NA	C/C	NA
B046	NA	C/C	NA
B047	NA	C/C	NA
B048	NA	T/T	NA
B049	NA	T/T	NA
B051	NA	NA	NA
B052	NA	C/C	NA
B053	NA	C/C	NA
B054	NA	C/C	NA
B055	NA	C/C	NA
B056	NA	C/C	NA
B057	NA	C/C	NA
B058	NA	NA	NA
B059	NA	C/C	NA
B060	NA	NA	NA
B061	NA	NA	NA
B062	NA	NA	NA
B063	NA	C/C	NA
B064	NA	C/C	NA
B065	NA	NA	NA
B066	NA	NA	NA
B067	NA	T/T	NA
B068	NA	C/C	NA
B069	NA	C/C	NA
B070	NA	C/C	NA
B071	NA	C/C	NA
B072	NA	NA	NA
B073	NA	C/C	NA
B074	NA	C/C	NA
B075	NA	C/C	NA
B076	NA	C/C	NA
B077	NA	NA	NA
B079	NA	C/C	NA
B081	NA	C/C	NA
B082	NA	C/C	NA
B083	NA	C/C	NA
B084	NA	C/C	NA
B085	NA	C/T	NA
B086	NA	C/C	NA
B087	NA	C/C	NA
B088	NA	C/C	NA
B089	NA	C/C	NA
B090	NA	C/C	NA
B091	NA	NA	NA
B092	NA	C/C	NA
B093	NA	NA	NA
B094	NA	C/C	NA
B095	NA	C/C	NA
B096	NA	C/C	NA
B097	NA	T/T	NA
B100	NA	NA	NA
B101	NA	C/C	NA
B102	NA	C/C	NA
B103	NA	NA	NA
B104	NA	C/C	NA
B105	NA	T/T	NA
B106	NA	C/C	NA
B107	NA	C/C	NA
B108	NA	C/C	NA
B109	NA	C/C	NA
B110	NA	NA	NA
B111	NA	C/C	NA
B112	NA	C/C	NA
B113	NA	C/C	NA
B114	NA	C/C	NA
B115	NA	C/C	NA
B116	NA	T/T	NA
B117	NA	C/C	NA
B118	NA	NA	NA
B119	NA	C/C	NA
B120	NA	NA	NA
B121	NA	C/C	NA
B122	NA	C/C	NA
B123	NA	T/T	NA
B124	NA	NA	NA
B125	NA	C/C	NA
B126	NA	C/C	NA
B127	NA	C/C	NA
B128	NA	T/T	NA
B129	NA	C/C	NA
B130	NA	C/C	NA
B131	NA	C/C	NA
B132	NA	NA	NA
B133	NA	C/C	NA
B134	NA	C/C	NA
B135	NA	T/T	NA
B136	NA	NA	NA
B137	NA	T/T	NA
B138	NA	C/C	NA
B139	NA	T/T	NA
B140	NA	C/C	NA
B141	NA	T/T	NA
B142	NA	C/C	NA
B143	NA	NA	NA
B144	NA	C/C	NA
B145	NA	NA	NA
B146	NA	T/T	NA
B147	NA	NA	NA
B148	NA	NA	NA
B149	NA	C/C	NA
B150	NA	C/C	NA
B151	NA	NA	NA
B152	NA	NA	NA
B153	NA	C/C	NA
B154	NA	C/C	NA
B155	NA	T/T	NA
B156	NA	C/C	NA
B157	NA	C/C	NA
B158	NA	C/C	NA
B159	NA	C/T	NA
B160	NA	C/C	NA
B161	NA	C/C	NA
B162	NA	C/C	NA
B163	NA	C/C	NA
B164	NA	T/T	NA
B165	NA	C/C	NA
B166	NA	NA	NA
B167	NA	NA	NA
B168	NA	C/C	NA
B169	NA	C/C	NA
B170	NA	C/C	NA
B171	NA	C/C	NA
B173	NA	C/C	NA
B176	NA	NA	NA
B179	NA	C/C	NA
B180	NA	T/T	NA
B181	NA	C/C	NA
B182	NA	C/C	NA
B183	NA	C/C	NA
B184	NA	C/C	NA
B185	NA	C/C	NA
B187	NA	NA	NA
B188	NA	C/C	NA
B189	NA	C/C	NA
B190	NA	C/C	NA
B191	NA	C/C	NA
B192	NA	C/C	NA
B193	NA	T/T	NA
B194	NA	T/T	NA
B195	NA	C/C	NA
B196	NA	C/C	NA
B197	NA	T/T	NA
B198	NA	NA	NA
B199	NA	NA	NA
B200	NA	T/T	NA
B201	NA	C/C	NA
B202	NA	T/T	NA
B203	NA	C/C	NA
B204	NA	C/C	NA
B205	NA	C/C	NA
B207	NA	NA	NA
B208	NA	C/C	NA
B210	NA	C/C	NA
B212	NA	C/C	NA
B213	NA	NA	NA
B214	NA	NA	NA
B215	NA	C/C	NA
B216	NA	NA	NA
B217	NA	T/T	NA
B218	NA	NA	NA
B219	NA	C/C	NA
B221	NA	C/C	NA
B222	NA	C/C	NA
B223	NA	NA	NA
B224	NA	C/C	NA
B225	NA	NA	NA
B226	NA	C/C	NA
B227	NA	C/C	NA
B228	NA	C/C	NA
B229	NA	NA	NA
B230	NA	C/C	NA
B231	NA	C/C	NA
B232	NA	T/T	NA
B233	NA	C/C	NA
B234	NA	C/C	NA
B235	NA	C/C	NA
B236	NA	C/C	NA
B238	NA	C/C	NA
B239	NA	NA	NA
B240	NA	C/C	NA
B241	NA	C/C	NA
B242	NA	C/C	NA
B243	NA	T/T	NA
B244	NA	C/C	NA
B245	NA	C/C	NA
B246	NA	C/C	NA
B247	NA	C/C	NA
B248	NA	C/C	NA
B249	NA	C/C	NA
B250	NA	C/C	NA
B252	NA	T/T	NA
B253	NA	C/C	NA
B254	NA	C/C	NA
B255	NA	NA	NA
B258	NA	C/C	NA
B259	NA	C/C	NA
B260	NA	C/C	NA
B261	NA	C/C	NA
B263	NA	C/C	NA
B264	NA	C/C	NA
B265	NA	C/C	NA
B266	NA	C/C	NA
B267	NA	T/T	NA
B268	NA	C/C	NA
B269	NA	C/C	NA
CX10	NA	C/C	NA
CX100	NA	C/C	NA
CX101	NA	C/C	NA
CX102	NA	C/C	NA
CX103	NA	NA	NA
CX104	NA	C/T	NA
CX106	NA	C/C	NA
CX107	NA	C/C	NA
CX108	NA	C/T	NA
CX109	NA	C/C	NA
CX11	NA	C/C	NA
CX110	NA	T/T	NA
CX111	NA	C/C	NA
CX112	NA	T/T	NA
CX113	NA	C/C	NA
CX114	NA	NA	NA
CX115	NA	C/C	NA
CX116	NA	C/C	NA
CX117	NA	C/C	NA
CX118	NA	C/C	NA
CX119	NA	C/C	NA
CX12	NA	T/T	NA
CX120	NA	C/C	NA
CX121	NA	C/C	NA
CX122	NA	T/T	NA
CX123	NA	NA	NA
CX124	NA	C/C	NA
CX125	NA	C/C	NA
CX126	NA	T/T	NA
CX128	NA	NA	NA
CX129	NA	C/C	NA
CX13	NA	NA	NA
CX130	NA	C/C	NA
CX131	NA	C/C	NA
CX132	NA	C/C	NA
CX133	NA	C/C	NA
CX134	NA	T/T	NA
CX138	NA	NA	NA
CX139	NA	C/C	NA
CX14	NA	C/C	NA
CX140	NA	C/C	NA
CX141	NA	T/T	NA
CX142	NA	C/C	NA
CX143	NA	C/C	NA
CX144	NA	T/T	NA
CX145	NA	C/C	NA
CX146	NA	NA	NA
CX147	NA	T/T	NA
CX148	NA	C/C	NA
CX149	NA	T/T	NA
CX15	NA	C/C	NA
CX150	NA	T/T	NA
CX151	NA	C/C	NA
CX152	NA	T/T	NA
CX153	NA	C/C	NA
CX154	NA	T/T	NA
CX155	NA	C/C	NA
CX156	NA	C/C	NA
CX157	NA	C/C	NA
CX158	NA	C/C	NA
CX16	NA	C/C	NA
CX160	NA	C/C	NA
CX161	NA	NA	NA
CX162	NA	NA	NA
CX165	NA	C/C	NA
CX17	NA	C/C	NA
CX18	NA	C/C	NA
CX182	NA	T/T	NA
CX19	NA	C/C	NA
CX2	NA	NA	NA
CX20	NA	T/T	NA
CX205	NA	C/C	NA
CX206	NA	NA	NA
CX207	NA	C/C	NA
CX21	NA	T/T	NA
CX210	NA	C/T	NA
CX211	NA	C/C	NA
CX212	NA	C/C	NA
CX213	NA	C/C	NA
CX214	NA	C/C	NA
CX218	NA	T/T	NA
CX219	NA	NA	NA
CX22	NA	T/T	NA
CX220	NA	C/C	NA
CX221	NA	T/T	NA
CX225	NA	C/C	NA
CX226	NA	C/C	NA
CX227	NA	NA	NA
CX228	NA	C/C	NA
CX23	NA	C/C	NA
CX230	NA	T/T	NA
CX231	NA	T/T	NA
CX232	NA	T/T	NA
CX233	NA	C/C	NA
CX234	NA	C/T	NA
CX235	NA	T/T	NA
CX236	NA	C/C	NA
CX237	NA	NA	NA
CX238	NA	C/C	NA
CX24	NA	T/T	NA
CX240	NA	T/T	NA
CX241	NA	C/C	NA
CX242	NA	T/T	NA
CX243	NA	C/T	NA
CX247	NA	NA	NA
CX248	NA	C/C	NA
CX249	NA	C/C	NA
CX25	NA	T/T	NA
CX250	NA	NA	NA
CX251	NA	C/C	NA
CX26	NA	C/C	NA
CX262	NA	C/C	NA
CX263	NA	C/C	NA
CX265	NA	C/C	NA
CX266	NA	C/C	NA
CX267	NA	NA	NA
CX268	NA	C/C	NA
CX269	NA	C/C	NA
CX27	NA	C/T	NA
CX270	NA	C/C	NA
CX273	NA	T/T	NA
CX274	NA	T/T	NA
CX275	NA	T/T	NA
CX276	NA	NA	NA
CX277	NA	NA	NA
CX278	NA	C/C	NA
CX28	NA	C/C	NA
CX280	NA	C/C	NA
CX281	NA	C/C	NA
CX282	NA	C/C	NA
CX284	NA	C/C	NA
CX285	NA	C/C	NA
CX286	NA	C/C	NA
CX287	NA	C/C	NA
CX288	NA	NA	NA
CX29	NA	C/C	NA
CX290	NA	NA	NA
CX291	NA	C/C	NA
CX296	NA	C/C	NA
CX3	NA	C/C	NA
CX30	NA	C/C	NA
CX303	NA	T/T	NA
CX304	NA	T/T	NA
CX305	NA	T/T	NA
CX306	NA	C/C	NA
CX307	NA	C/C	NA
CX31	NA	NA	NA
CX313	NA	C/C	NA
CX314	NA	T/T	NA
CX315	NA	C/C	NA
CX316	NA	C/C	NA
CX317	NA	C/C	NA
CX318	NA	C/C	NA
CX319	NA	T/T	NA
CX32	NA	C/C	NA
CX328	NA	NA	NA
CX329	NA	C/C	NA
CX33	NA	C/C	NA
CX330	NA	C/C	NA
CX34	NA	NA	NA
CX340	NA	T/T	NA
CX341	NA	C/C	NA
CX342	NA	C/C	NA
CX343	NA	T/T	NA
CX344	NA	C/C	NA
CX345	NA	C/C	NA
CX346	NA	C/C	NA
CX347	NA	C/C	NA
CX348	NA	C/C	NA
CX349	NA	C/C	NA
CX35	NA	C/C	NA
CX350	NA	C/C	NA
CX351	NA	NA	NA
CX352	NA	C/C	NA
CX353	NA	C/C	NA
CX354	NA	C/C	NA
CX355	NA	C/C	NA
CX356	NA	C/C	NA
CX357	NA	C/T	NA
CX358	NA	NA	NA
CX359	NA	C/C	NA
CX360	NA	C/C	NA
CX361	NA	T/T	NA
CX362	NA	T/T	NA
CX363	NA	T/T	NA
CX364	NA	C/C	NA
CX365	NA	C/T	NA
CX366	NA	C/C	NA
CX367	NA	C/C	NA
CX368	NA	T/T	NA
CX369	NA	T/T	NA
CX37	NA	NA	NA
CX370	NA	C/C	NA
CX371	NA	C/C	NA
CX372	NA	C/C	NA
CX373	NA	C/C	NA
CX374	NA	C/C	NA
CX375	NA	T/T	NA
CX376	NA	C/T	NA
CX377	NA	C/C	NA
CX378	NA	C/C	NA
CX379	NA	C/C	NA
CX380	NA	C/C	NA
CX381	NA	C/C	NA
CX382	NA	T/T	NA
CX383	NA	C/C	NA
CX384	NA	C/C	NA
CX385	NA	C/C	NA
CX386	NA	T/T	NA
CX387	NA	NA	NA
CX388	NA	C/C	NA
CX389	NA	C/C	NA
CX390	NA	C/C	NA
CX391	NA	C/C	NA
CX392	NA	T/T	NA
CX393	NA	NA	NA
CX394	NA	T/T	NA
CX395	NA	NA	NA
CX396	NA	C/C	NA
CX397	NA	C/C	NA
CX399	NA	C/C	NA
CX4	NA	C/T	NA
CX400	NA	C/T	NA
CX401	NA	C/T	NA
CX402	NA	T/T	NA
CX403	NA	C/C	NA
CX408	NA	T/T	NA
CX409	NA	T/T	NA
CX410	NA	T/T	NA
CX411	NA	T/T	NA
CX413	NA	T/T	NA
CX414	NA	T/T	NA
CX416	NA	T/T	NA
CX417	NA	T/T	NA
CX418	NA	T/T	NA
CX419	NA	T/T	NA
CX42	NA	C/C	NA
CX420	NA	T/T	NA
CX421	NA	T/T	NA
CX422	NA	T/T	NA
CX423	NA	T/T	NA
CX424	NA	T/T	NA
CX425	NA	T/T	NA
CX426	NA	C/C	NA
CX427	NA	C/C	NA
CX428	NA	C/C	NA
CX429	NA	C/C	NA
CX43	NA	C/C	NA
CX431	NA	NA	NA
CX44	NA	C/C	NA
CX45	NA	T/T	NA
CX46	NA	T/T	NA
CX47	NA	C/C	NA
CX48	NA	C/T	NA
CX49	NA	NA	NA
CX5	NA	T/T	NA
CX50	NA	C/C	NA
CX51	NA	C/C	NA
CX52	NA	T/T	NA
CX53	NA	T/T	NA
CX534	NA	C/C	NA
CX54	NA	NA	NA
CX542	NA	T/T	NA
CX548	NA	C/C	NA
CX55	NA	C/C	NA
CX56	NA	C/C	NA
CX561	NA	C/C	NA
CX57	NA	T/T	NA
CX578	NA	C/C	NA
CX579	NA	C/C	NA
CX58	NA	C/C	NA
CX59	NA	T/T	NA
CX6	NA	C/C	NA
CX60	NA	C/C	NA
CX61	NA	C/C	NA
CX63	NA	T/T	NA
CX64	NA	T/T	NA
CX65	NA	T/T	NA
CX66	NA	T/T	NA
CX67	NA	T/T	NA
CX68	NA	C/C	NA
CX69	NA	C/C	NA
CX70	NA	T/T	NA
CX71	NA	C/C	NA
CX72	NA	T/T	NA
CX73	NA	T/T	NA
CX74	NA	C/C	NA
CX75	NA	C/C	NA
CX76	NA	C/C	NA
CX77	NA	C/C	NA
CX78	NA	C/C	NA
CX79	NA	C/T	NA
CX8	NA	C/C	NA
CX80	NA	T/T	NA
CX82	NA	T/T	NA
CX83	NA	T/T	NA
CX84	NA	T/T	NA
CX85	NA	T/T	NA
CX86	NA	C/T	NA
CX87	NA	T/T	NA
CX88	NA	C/C	NA
CX89	NA	C/C	NA
CX9	NA	T/T	NA
CX90	NA	C/C	NA
CX91	NA	C/T	NA
CX92	NA	C/C	NA
CX93	NA	C/C	NA
CX94	NA	NA	NA
CX96	NA	T/T	NA
CX97	NA	C/C	NA
CX98	NA	NA	NA
CX99	NA	T/T	NA
IRIS_313-10000	NA	T/T	NA
IRIS_313-10001	NA	NA	NA
IRIS_313-10002	NA	C/C	NA
IRIS_313-10007	NA	NA	NA
IRIS_313-10010	NA	C/C	NA
IRIS_313-10014	NA	C/C	NA
IRIS_313-10016	NA	NA	NA
IRIS_313-10020	0	C/T	NA
IRIS_313-10025	1	NA	NA
IRIS_313-10026	NA	NA	NA
IRIS_313-10030	NA	C/C	NA
IRIS_313-10032	NA	T/T	NA
IRIS_313-10034	NA	C/C	NA
IRIS_313-10035	NA	NA	NA
IRIS_313-10040	NA	T/T	NA
IRIS_313-10041	NA	C/C	NA
IRIS_313-10045	NA	C/C	NA
IRIS_313-10046	1	NA	NA
IRIS_313-10047	0	NA	NA
IRIS_313-10048	NA	C/C	NA
IRIS_313-10050	NA	C/C	NA
IRIS_313-10051	NA	C/C	NA
IRIS_313-10054	0	NA	NA
IRIS_313-10056	0	C/C	NA
IRIS_313-10057	NA	C/C	NA
IRIS_313-10059	0	C/C	NA
IRIS_313-10061	NA	C/C	NA
IRIS_313-10062	0	C/C	NA
IRIS_313-10065	NA	C/C	NA
IRIS_313-10067	0	C/C	NA
IRIS_313-10071	NA	C/C	NA
IRIS_313-10073	NA	C/C	NA
IRIS_313-10074	NA	C/C	NA
IRIS_313-10075	NA	C/C	NA
IRIS_313-10076	NA	C/C	NA
IRIS_313-10077	NA	C/C	NA
IRIS_313-10078	NA	C/C	NA
IRIS_313-10079	NA	C/C	NA
IRIS_313-10080	NA	C/C	NA
IRIS_313-10082	NA	C/C	NA
IRIS_313-10083	NA	C/C	NA
IRIS_313-10084	NA	C/C	NA
IRIS_313-10089	NA	C/C	NA
IRIS_313-10092	NA	C/C	NA
IRIS_313-10093	NA	C/C	NA
IRIS_313-10094	NA	C/C	NA
IRIS_313-10096	0	C/C	NA
IRIS_313-10097	1	C/C	NA
IRIS_313-10099	0	C/C	NA
IRIS_313-10102	NA	C/C	NA
IRIS_313-10103	NA	NA	NA
IRIS_313-10109	NA	T/T	NA
IRIS_313-10111	NA	C/C	NA
IRIS_313-10113	0	T/T	1
IRIS_313-10114	NA	C/C	NA
IRIS_313-10119	NA	C/C	NA
IRIS_313-10124	NA	C/C	NA
IRIS_313-10129	NA	NA	NA
IRIS_313-10134	0	T/T	1
IRIS_313-10147	NA	C/C	NA
IRIS_313-10148	NA	NA	NA
IRIS_313-10150	NA	NA	NA
IRIS_313-10151	0	T/T	1
IRIS_313-10152	NA	C/C	NA
IRIS_313-10154	1	C/C	NA
IRIS_313-10158	NA	T/T	NA
IRIS_313-10161	NA	T/T	NA
IRIS_313-10164	NA	C/C	NA
IRIS_313-10167	NA	NA	NA
IRIS_313-10168	NA	T/T	NA
IRIS_313-10170	NA	NA	NA
IRIS_313-10171	0	C/T	NA
IRIS_313-10176	NA	C/C	NA
IRIS_313-10177	NA	C/C	NA
IRIS_313-10178	NA	C/C	NA
IRIS_313-10179	NA	NA	NA
IRIS_313-10189	1	C/C	NA
IRIS_313-10190	NA	C/C	NA
IRIS_313-10191	NA	C/C	NA
IRIS_313-10196	NA	C/C	NA
IRIS_313-10211	1	C/C	NA
IRIS_313-10220	NA	NA	NA
IRIS_313-10221	NA	C/C	NA
IRIS_313-10224	NA	NA	NA
IRIS_313-10226	NA	C/C	NA
IRIS_313-10228	0	NA	NA
IRIS_313-10234	NA	T/T	NA
IRIS_313-10235	NA	T/T	NA
IRIS_313-10237	NA	C/C	NA
IRIS_313-10238	0	C/C	NA
IRIS_313-10239	NA	NA	NA
IRIS_313-10242	NA	C/C	NA
IRIS_313-10247	0	T/T	1
IRIS_313-10257	NA	T/T	NA
IRIS_313-10258	NA	C/C	NA
IRIS_313-10260	NA	C/C	NA
IRIS_313-10263	NA	NA	NA
IRIS_313-10268	NA	T/T	NA
IRIS_313-10271	NA	T/T	NA
IRIS_313-10272	NA	C/C	NA
IRIS_313-10274	NA	T/T	NA
IRIS_313-10275	0	NA	NA
IRIS_313-10279	0	T/T	1
IRIS_313-10285	NA	C/C	NA
IRIS_313-10287	NA	NA	NA
IRIS_313-10289	NA	C/T	NA
IRIS_313-10290	NA	T/T	NA
IRIS_313-10293	0	T/T	1
IRIS_313-10294	NA	C/C	NA
IRIS_313-10295	NA	C/C	NA
IRIS_313-10298	1	C/C	NA
IRIS_313-10300	0	C/C	NA
IRIS_313-10301	0	NA	NA
IRIS_313-10307	0	T/T	1
IRIS_313-10314	0	T/T	1
IRIS_313-10318	0	T/T	1
IRIS_313-10325	NA	C/C	NA
IRIS_313-10327	NA	C/C	NA
IRIS_313-10332	NA	T/T	NA
IRIS_313-10333	0	C/C	NA
IRIS_313-10334	0	C/C	NA
IRIS_313-10336	NA	C/C	NA
IRIS_313-10337	NA	T/T	NA
IRIS_313-10340	NA	C/C	NA
IRIS_313-10341	NA	T/T	NA
IRIS_313-10348	NA	C/C	NA
IRIS_313-10349	NA	NA	NA
IRIS_313-10352	0	NA	NA
IRIS_313-10353	NA	T/T	NA
IRIS_313-10355	NA	NA	NA
IRIS_313-10357	NA	C/C	NA
IRIS_313-10359	NA	NA	NA
IRIS_313-10360	NA	NA	NA
IRIS_313-10361	NA	T/T	NA
IRIS_313-10366	NA	C/T	NA
IRIS_313-10371	NA	C/C	NA
IRIS_313-10373	NA	C/C	NA
IRIS_313-10374	NA	C/C	NA
IRIS_313-10375	1	NA	NA
IRIS_313-10379	NA	C/C	NA
IRIS_313-10380	NA	T/T	NA
IRIS_313-10385	NA	C/C	NA
IRIS_313-10392	NA	T/T	NA
IRIS_313-10394	NA	T/T	NA
IRIS_313-10396	NA	T/T	NA
IRIS_313-10397	NA	T/T	NA
IRIS_313-10398	NA	T/T	NA
IRIS_313-10399	0	T/T	1
IRIS_313-10400	0	NA	NA
IRIS_313-10401	NA	T/T	NA
IRIS_313-10402	NA	T/T	NA
IRIS_313-10403	NA	T/T	NA
IRIS_313-10404	NA	T/T	NA
IRIS_313-10412	NA	T/T	NA
IRIS_313-10417	NA	T/T	NA
IRIS_313-10421	NA	T/T	NA
IRIS_313-10422	NA	C/C	NA
IRIS_313-10423	NA	T/T	NA
IRIS_313-10428	NA	NA	NA
IRIS_313-10429	NA	C/C	NA
IRIS_313-10430	1	C/C	NA
IRIS_313-10433	NA	C/C	NA
IRIS_313-10437	NA	C/C	NA
IRIS_313-10440	0	NA	NA
IRIS_313-10441	NA	T/T	NA
IRIS_313-10444	NA	C/C	NA
IRIS_313-10448	NA	NA	NA
IRIS_313-10449	NA	C/C	NA
IRIS_313-10450	NA	C/C	NA
IRIS_313-10452	NA	C/C	NA
IRIS_313-10453	0	C/C	NA
IRIS_313-10458	NA	C/C	NA
IRIS_313-10459	NA	C/C	NA
IRIS_313-10469	NA	C/C	NA
IRIS_313-10476	NA	NA	NA
IRIS_313-10477	1	C/C	NA
IRIS_313-10480	NA	NA	NA
IRIS_313-10484	NA	NA	NA
IRIS_313-10485	NA	C/C	NA
IRIS_313-10489	NA	C/C	NA
IRIS_313-10497	NA	C/C	NA
IRIS_313-10502	NA	C/C	NA
IRIS_313-10503	NA	C/C	NA
IRIS_313-10504	NA	C/C	NA
IRIS_313-10506	NA	T/T	NA
IRIS_313-10507	0	C/C	NA
IRIS_313-10509	NA	NA	NA
IRIS_313-10510	NA	C/C	NA
IRIS_313-10511	1	NA	NA
IRIS_313-10513	NA	T/T	NA
IRIS_313-10514	NA	T/T	NA
IRIS_313-10515	0	C/C	NA
IRIS_313-10516	NA	C/C	NA
IRIS_313-10517	NA	C/C	NA
IRIS_313-10518	NA	T/T	NA
IRIS_313-10519	0	C/T	NA
IRIS_313-10520	NA	C/C	NA
IRIS_313-10521	NA	T/T	NA
IRIS_313-10522	NA	C/C	NA
IRIS_313-10523	NA	NA	NA
IRIS_313-10524	NA	NA	NA
IRIS_313-10525	NA	C/C	NA
IRIS_313-10526	NA	C/C	NA
IRIS_313-10527	NA	NA	NA
IRIS_313-10531	NA	C/T	NA
IRIS_313-10534	1	C/T	NA
IRIS_313-10536	NA	NA	NA
IRIS_313-10537	NA	C/C	NA
IRIS_313-10539	NA	C/C	NA
IRIS_313-10541	NA	C/C	NA
IRIS_313-10542	NA	C/C	NA
IRIS_313-10543	NA	C/C	NA
IRIS_313-10544	NA	T/T	NA
IRIS_313-10545	NA	C/C	NA
IRIS_313-10547	NA	C/C	NA
IRIS_313-10549	NA	C/C	NA
IRIS_313-10550	NA	T/T	NA
IRIS_313-10552	NA	C/C	NA
IRIS_313-10554	NA	NA	NA
IRIS_313-10555	NA	T/T	NA
IRIS_313-10556	NA	C/C	NA
IRIS_313-10557	NA	NA	NA
IRIS_313-10558	NA	C/C	NA
IRIS_313-10559	NA	C/C	NA
IRIS_313-10560	NA	NA	NA
IRIS_313-10561	1	C/C	NA
IRIS_313-10562	NA	C/C	NA
IRIS_313-10563	NA	C/C	NA
IRIS_313-10564	NA	C/C	NA
IRIS_313-10565	NA	T/T	NA
IRIS_313-10566	NA	T/T	NA
IRIS_313-10567	NA	C/C	NA
IRIS_313-10568	NA	C/C	NA
IRIS_313-10569	NA	C/C	NA
IRIS_313-10570	NA	C/C	NA
IRIS_313-10572	NA	C/C	NA
IRIS_313-10573	NA	T/T	NA
IRIS_313-10574	NA	C/C	NA
IRIS_313-10575	NA	NA	NA
IRIS_313-10576	0	T/T	1
IRIS_313-10577	NA	C/C	NA
IRIS_313-10578	NA	C/C	NA
IRIS_313-10580	0	C/C	NA
IRIS_313-10581	0	C/C	NA
IRIS_313-10582	NA	C/C	NA
IRIS_313-10583	NA	NA	NA
IRIS_313-10585	1	C/C	NA
IRIS_313-10587	NA	NA	NA
IRIS_313-10592	NA	T/T	NA
IRIS_313-10593	NA	C/C	NA
IRIS_313-10594	0	NA	NA
IRIS_313-10595	NA	T/T	NA
IRIS_313-10598	NA	T/T	NA
IRIS_313-10600	NA	T/T	NA
IRIS_313-10602	NA	NA	NA
IRIS_313-10603	NA	C/C	NA
IRIS_313-10604	NA	T/T	NA
IRIS_313-10605	1	NA	NA
IRIS_313-10606	NA	T/T	NA
IRIS_313-10608	NA	C/C	NA
IRIS_313-10609	1	C/C	NA
IRIS_313-10610	NA	C/T	NA
IRIS_313-10614	NA	NA	NA
IRIS_313-10617	1	NA	NA
IRIS_313-10618	NA	C/C	NA
IRIS_313-10619	NA	C/C	NA
IRIS_313-10620	0	C/C	NA
IRIS_313-10623	NA	NA	NA
IRIS_313-10628	1	C/C	NA
IRIS_313-10631	NA	C/C	NA
IRIS_313-10640	NA	NA	NA
IRIS_313-10642	NA	C/C	NA
IRIS_313-10644	NA	C/C	NA
IRIS_313-10645	NA	C/C	NA
IRIS_313-10648	0	T/T	1
IRIS_313-10649	NA	C/C	NA
IRIS_313-10650	NA	NA	NA
IRIS_313-10651	0	T/T	1
IRIS_313-10652	NA	C/C	NA
IRIS_313-10653	NA	C/C	NA
IRIS_313-10654	NA	T/T	NA
IRIS_313-10655	NA	C/C	NA
IRIS_313-10656	0	C/C	NA
IRIS_313-10657	0	C/C	NA
IRIS_313-10659	NA	C/C	NA
IRIS_313-10660	NA	C/C	NA
IRIS_313-10661	NA	NA	NA
IRIS_313-10662	NA	NA	NA
IRIS_313-10664	NA	C/C	NA
IRIS_313-10666	NA	C/C	NA
IRIS_313-10667	NA	C/C	NA
IRIS_313-10668	NA	C/T	NA
IRIS_313-10670	NA	C/C	NA
IRIS_313-10671	NA	C/C	NA
IRIS_313-10673	NA	NA	NA
IRIS_313-10674	NA	NA	NA
IRIS_313-10675	NA	C/C	NA
IRIS_313-10676	NA	C/C	NA
IRIS_313-10677	NA	C/C	NA
IRIS_313-10678	NA	C/C	NA
IRIS_313-10679	NA	C/C	NA
IRIS_313-10680	NA	C/C	NA
IRIS_313-10681	NA	C/C	NA
IRIS_313-10682	NA	C/C	NA
IRIS_313-10683	NA	C/C	NA
IRIS_313-10684	NA	C/C	NA
IRIS_313-10687	NA	NA	NA
IRIS_313-10688	NA	T/T	NA
IRIS_313-10689	NA	C/C	NA
IRIS_313-10690	NA	C/T	NA
IRIS_313-10692	NA	NA	NA
IRIS_313-10693	NA	C/C	NA
IRIS_313-10694	NA	NA	NA
IRIS_313-10695	NA	C/C	NA
IRIS_313-10697	NA	C/C	NA
IRIS_313-10698	NA	C/C	NA
IRIS_313-10699	NA	C/C	NA
IRIS_313-10700	NA	T/T	NA
IRIS_313-10701	NA	NA	NA
IRIS_313-10702	NA	C/C	NA
IRIS_313-10703	0	C/C	NA
IRIS_313-10704	NA	C/C	NA
IRIS_313-10705	NA	C/C	NA
IRIS_313-10706	NA	C/T	NA
IRIS_313-10707	NA	NA	NA
IRIS_313-10708	NA	C/C	NA
IRIS_313-10710	0	C/C	NA
IRIS_313-10711	NA	NA	NA
IRIS_313-10712	NA	C/C	NA
IRIS_313-10715	NA	C/C	NA
IRIS_313-10716	NA	C/C	NA
IRIS_313-10717	NA	T/T	NA
IRIS_313-10718	NA	C/C	NA
IRIS_313-10719	NA	NA	NA
IRIS_313-10720	NA	T/T	NA
IRIS_313-10721	NA	C/C	NA
IRIS_313-10722	0	C/C	NA
IRIS_313-10723	NA	C/C	NA
IRIS_313-10724	NA	C/T	NA
IRIS_313-10725	0	T/T	1
IRIS_313-10726	NA	NA	NA
IRIS_313-10727	NA	C/C	NA
IRIS_313-10728	NA	NA	NA
IRIS_313-10729	NA	T/T	NA
IRIS_313-10730	NA	C/C	NA
IRIS_313-10731	NA	C/C	NA
IRIS_313-10732	NA	C/C	NA
IRIS_313-10733	NA	NA	NA
IRIS_313-10734	1	NA	NA
IRIS_313-10735	NA	NA	NA
IRIS_313-10736	1	NA	NA
IRIS_313-10737	NA	T/T	NA
IRIS_313-10738	0	T/T	1
IRIS_313-10739	NA	C/C	NA
IRIS_313-10740	NA	C/C	NA
IRIS_313-10741	NA	C/C	NA
IRIS_313-10742	NA	T/T	NA
IRIS_313-10743	NA	C/C	NA
IRIS_313-10744	NA	C/C	NA
IRIS_313-10745	NA	C/C	NA
IRIS_313-10746	NA	C/C	NA
IRIS_313-10747	NA	C/C	NA
IRIS_313-10748	NA	C/C	NA
IRIS_313-10749	NA	C/C	NA
IRIS_313-10750	0	NA	NA
IRIS_313-10751	NA	C/C	NA
IRIS_313-10752	NA	C/C	NA
IRIS_313-10753	0	T/T	1
IRIS_313-10754	NA	C/C	NA
IRIS_313-10755	NA	C/T	NA
IRIS_313-10756	NA	C/C	NA
IRIS_313-10757	NA	NA	NA
IRIS_313-10758	1	C/C	NA
IRIS_313-10759	NA	C/C	NA
IRIS_313-10760	NA	NA	NA
IRIS_313-10761	NA	C/C	NA
IRIS_313-10762	1	C/C	NA
IRIS_313-10765	NA	C/C	NA
IRIS_313-10766	NA	C/C	NA
IRIS_313-10767	1	C/C	NA
IRIS_313-10768	0	T/T	1
IRIS_313-10769	1	C/C	NA
IRIS_313-10770	NA	C/C	NA
IRIS_313-10771	NA	C/C	NA
IRIS_313-10772	NA	T/T	NA
IRIS_313-10773	NA	C/C	NA
IRIS_313-10774	NA	T/T	NA
IRIS_313-10775	NA	T/T	NA
IRIS_313-10776	NA	C/C	NA
IRIS_313-10777	NA	T/T	NA
IRIS_313-10778	NA	C/T	NA
IRIS_313-10779	NA	T/T	NA
IRIS_313-10780	0	C/C	NA
IRIS_313-10781	NA	C/C	NA
IRIS_313-10782	NA	C/C	NA
IRIS_313-10783	NA	C/C	NA
IRIS_313-10784	NA	C/C	NA
IRIS_313-10785	NA	C/C	NA
IRIS_313-10786	NA	C/C	NA
IRIS_313-10787	NA	C/C	NA
IRIS_313-10788	NA	C/C	NA
IRIS_313-10789	NA	C/C	NA
IRIS_313-10790	NA	C/C	NA
IRIS_313-10791	NA	C/C	NA
IRIS_313-10792	NA	T/T	NA
IRIS_313-10793	NA	C/C	NA
IRIS_313-10794	NA	C/C	NA
IRIS_313-10795	NA	C/C	NA
IRIS_313-10796	NA	C/C	NA
IRIS_313-10797	NA	C/C	NA
IRIS_313-10798	NA	C/C	NA
IRIS_313-10799	NA	C/C	NA
IRIS_313-10800	NA	C/C	NA
IRIS_313-10801	NA	C/C	NA
IRIS_313-10802	NA	C/C	NA
IRIS_313-10803	NA	C/C	NA
IRIS_313-10804	NA	T/T	NA
IRIS_313-10805	NA	C/C	NA
IRIS_313-10806	0	C/C	NA
IRIS_313-10807	NA	NA	NA
IRIS_313-10808	NA	C/C	NA
IRIS_313-10809	NA	C/C	NA
IRIS_313-10810	NA	T/T	NA
IRIS_313-10811	NA	T/T	NA
IRIS_313-10812	NA	T/T	NA
IRIS_313-10813	NA	C/C	NA
IRIS_313-10814	NA	T/T	NA
IRIS_313-10815	NA	C/C	NA
IRIS_313-10816	NA	C/C	NA
IRIS_313-10817	NA	C/C	NA
IRIS_313-10818	NA	C/C	NA
IRIS_313-10819	NA	C/C	NA
IRIS_313-10820	NA	C/T	NA
IRIS_313-10821	NA	C/C	NA
IRIS_313-10822	NA	C/C	NA
IRIS_313-10823	NA	C/C	NA
IRIS_313-10824	NA	T/T	NA
IRIS_313-10825	NA	C/T	NA
IRIS_313-10827	NA	C/C	NA
IRIS_313-10828	NA	C/C	NA
IRIS_313-10829	NA	C/C	NA
IRIS_313-10830	NA	C/C	NA
IRIS_313-10831	NA	C/C	NA
IRIS_313-10832	NA	C/C	NA
IRIS_313-10833	NA	T/T	NA
IRIS_313-10834	NA	C/C	NA
IRIS_313-10835	1	C/C	NA
IRIS_313-10836	1	C/T	NA
IRIS_313-10837	NA	C/C	NA
IRIS_313-10838	NA	C/C	NA
IRIS_313-10839	NA	C/C	NA
IRIS_313-10840	NA	C/C	NA
IRIS_313-10841	NA	C/C	NA
IRIS_313-10842	NA	T/T	NA
IRIS_313-10844	NA	C/C	NA
IRIS_313-10845	NA	T/T	NA
IRIS_313-10847	NA	C/C	NA
IRIS_313-10848	0	C/C	NA
IRIS_313-10849	1	C/C	NA
IRIS_313-10850	NA	C/C	NA
IRIS_313-10851	NA	NA	NA
IRIS_313-10852	NA	C/C	NA
IRIS_313-10853	1	C/C	NA
IRIS_313-10854	0	T/T	1
IRIS_313-10855	1	C/C	NA
IRIS_313-10856	NA	NA	NA
IRIS_313-10857	NA	C/C	NA
IRIS_313-10858	NA	C/C	NA
IRIS_313-10859	NA	C/C	NA
IRIS_313-10861	0	T/T	1
IRIS_313-10862	NA	C/C	NA
IRIS_313-10863	NA	T/T	NA
IRIS_313-10864	NA	NA	NA
IRIS_313-10865	1	C/C	NA
IRIS_313-10866	NA	C/C	NA
IRIS_313-10867	NA	C/C	NA
IRIS_313-10868	NA	NA	NA
IRIS_313-10869	NA	NA	NA
IRIS_313-10870	NA	C/C	NA
IRIS_313-10871	NA	T/T	NA
IRIS_313-10872	0	C/C	NA
IRIS_313-10873	NA	C/C	NA
IRIS_313-10874	0	C/C	NA
IRIS_313-10875	0	NA	NA
IRIS_313-10876	NA	T/T	NA
IRIS_313-10877	NA	T/T	NA
IRIS_313-10878	NA	T/T	NA
IRIS_313-10879	1	C/T	NA
IRIS_313-10880	0	C/C	NA
IRIS_313-10881	NA	C/C	NA
IRIS_313-10882	NA	T/T	NA
IRIS_313-10883	0	C/C	NA
IRIS_313-10884	NA	C/C	NA
IRIS_313-10885	NA	C/C	NA
IRIS_313-10886	0	C/C	NA
IRIS_313-10887	NA	C/C	NA
IRIS_313-10888	NA	C/C	NA
IRIS_313-10889	NA	C/C	NA
IRIS_313-10890	NA	C/C	NA
IRIS_313-10891	NA	NA	NA
IRIS_313-10892	NA	C/C	NA
IRIS_313-10893	NA	C/C	NA
IRIS_313-10894	NA	C/C	NA
IRIS_313-10895	NA	C/C	NA
IRIS_313-10896	NA	C/C	NA
IRIS_313-10897	NA	C/C	NA
IRIS_313-10898	NA	C/C	NA
IRIS_313-10899	NA	T/T	NA
IRIS_313-10900	NA	T/T	NA
IRIS_313-10901	NA	C/C	NA
IRIS_313-10902	NA	NA	NA
IRIS_313-10903	0	T/T	1
IRIS_313-10904	NA	NA	NA
IRIS_313-10905	NA	C/C	NA
IRIS_313-10906	NA	T/T	NA
IRIS_313-10907	NA	C/C	NA
IRIS_313-10908	NA	C/C	NA
IRIS_313-10909	NA	C/C	NA
IRIS_313-10910	NA	T/T	NA
IRIS_313-10911	NA	NA	NA
IRIS_313-10912	NA	T/T	NA
IRIS_313-10913	NA	NA	NA
IRIS_313-10915	NA	NA	NA
IRIS_313-10916	NA	C/C	NA
IRIS_313-10917	NA	C/C	NA
IRIS_313-10918	NA	C/C	NA
IRIS_313-10919	NA	C/C	NA
IRIS_313-10920	NA	C/C	NA
IRIS_313-10921	NA	NA	NA
IRIS_313-10922	NA	C/C	NA
IRIS_313-10923	NA	C/C	NA
IRIS_313-10924	NA	NA	NA
IRIS_313-10925	NA	C/C	NA
IRIS_313-10926	NA	C/C	NA
IRIS_313-10927	NA	NA	NA
IRIS_313-10928	NA	T/T	NA
IRIS_313-10929	1	C/C	NA
IRIS_313-10930	NA	C/C	NA
IRIS_313-10931	1	C/C	NA
IRIS_313-10932	1	C/C	NA
IRIS_313-10933	NA	T/T	NA
IRIS_313-10934	NA	T/T	NA
IRIS_313-10935	NA	T/T	NA
IRIS_313-10936	NA	C/C	NA
IRIS_313-10937	NA	C/C	NA
IRIS_313-10938	NA	T/T	NA
IRIS_313-10940	NA	C/C	NA
IRIS_313-10941	NA	T/T	NA
IRIS_313-10942	NA	C/C	NA
IRIS_313-10943	NA	T/T	NA
IRIS_313-10944	NA	C/C	NA
IRIS_313-10945	NA	C/C	NA
IRIS_313-10946	NA	C/C	NA
IRIS_313-10947	NA	T/T	NA
IRIS_313-10948	NA	C/C	NA
IRIS_313-10949	NA	C/C	NA
IRIS_313-10950	NA	C/C	NA
IRIS_313-10951	0	T/T	1
IRIS_313-10952	NA	C/C	NA
IRIS_313-10953	NA	C/C	NA
IRIS_313-10954	NA	T/T	NA
IRIS_313-10955	NA	C/C	NA
IRIS_313-10956	NA	C/C	NA
IRIS_313-10957	NA	C/C	NA
IRIS_313-10958	NA	C/C	NA
IRIS_313-10959	NA	C/C	NA
IRIS_313-10960	NA	C/C	NA
IRIS_313-10961	NA	T/T	NA
IRIS_313-10962	NA	T/T	NA
IRIS_313-10963	NA	T/T	NA
IRIS_313-10964	NA	C/C	NA
IRIS_313-10965	NA	T/T	NA
IRIS_313-10966	NA	C/C	NA
IRIS_313-10967	NA	C/C	NA
IRIS_313-10968	1	C/C	NA
IRIS_313-10969	NA	C/C	NA
IRIS_313-10970	NA	C/C	NA
IRIS_313-10971	NA	C/C	NA
IRIS_313-10972	NA	NA	NA
IRIS_313-10973	NA	C/C	NA
IRIS_313-10974	NA	C/C	NA
IRIS_313-10975	NA	C/C	NA
IRIS_313-10976	1	NA	NA
IRIS_313-10977	NA	C/C	NA
IRIS_313-10978	NA	C/C	NA
IRIS_313-10979	NA	NA	NA
IRIS_313-10980	NA	NA	NA
IRIS_313-10981	NA	NA	NA
IRIS_313-10982	NA	C/C	NA
IRIS_313-10983	NA	C/C	NA
IRIS_313-10984	NA	T/T	NA
IRIS_313-10985	1	C/C	NA
IRIS_313-10986	NA	C/C	NA
IRIS_313-10987	NA	C/C	NA
IRIS_313-10988	NA	C/C	NA
IRIS_313-10989	NA	C/C	NA
IRIS_313-10990	NA	C/C	NA
IRIS_313-10991	NA	C/C	NA
IRIS_313-10992	NA	C/C	NA
IRIS_313-10993	NA	C/C	NA
IRIS_313-10994	NA	C/C	NA
IRIS_313-10995	NA	T/T	NA
IRIS_313-10996	0	T/T	1
IRIS_313-10997	NA	T/T	NA
IRIS_313-10998	NA	NA	NA
IRIS_313-10999	0	C/C	NA
IRIS_313-11000	NA	T/T	NA
IRIS_313-11001	NA	C/C	NA
IRIS_313-11003	NA	C/C	NA
IRIS_313-11004	NA	C/C	NA
IRIS_313-11005	NA	C/C	NA
IRIS_313-11006	NA	C/C	NA
IRIS_313-11007	NA	C/C	NA
IRIS_313-11008	NA	C/C	NA
IRIS_313-11009	NA	C/C	NA
IRIS_313-11010	NA	C/C	NA
IRIS_313-11011	NA	C/C	NA
IRIS_313-11012	NA	C/T	NA
IRIS_313-11013	NA	T/T	NA
IRIS_313-11014	NA	C/T	NA
IRIS_313-11015	NA	C/C	NA
IRIS_313-11016	NA	NA	NA
IRIS_313-11017	NA	T/T	NA
IRIS_313-11018	NA	T/T	NA
IRIS_313-11019	NA	NA	NA
IRIS_313-11020	NA	C/C	NA
IRIS_313-11021	NA	T/T	NA
IRIS_313-11022	NA	NA	NA
IRIS_313-11023	NA	T/T	NA
IRIS_313-11024	NA	NA	NA
IRIS_313-11025	NA	NA	NA
IRIS_313-11026	NA	C/C	NA
IRIS_313-11027	NA	NA	NA
IRIS_313-11028	NA	T/T	NA
IRIS_313-11029	NA	NA	NA
IRIS_313-11030	NA	T/T	NA
IRIS_313-11031	NA	C/T	NA
IRIS_313-11032	NA	T/T	NA
IRIS_313-11033	NA	T/T	NA
IRIS_313-11034	1	NA	NA
IRIS_313-11035	0	C/C	NA
IRIS_313-11036	NA	T/T	NA
IRIS_313-11037	NA	C/T	NA
IRIS_313-11038	1	C/C	NA
IRIS_313-11039	NA	C/C	NA
IRIS_313-11040	NA	C/C	NA
IRIS_313-11041	NA	C/C	NA
IRIS_313-11042	NA	C/C	NA
IRIS_313-11043	NA	T/T	NA
IRIS_313-11044	NA	C/C	NA
IRIS_313-11045	NA	C/C	NA
IRIS_313-11046	NA	C/C	NA
IRIS_313-11047	NA	T/T	NA
IRIS_313-11048	NA	T/T	NA
IRIS_313-11049	0	T/T	1
IRIS_313-11050	NA	T/T	NA
IRIS_313-11051	NA	C/C	NA
IRIS_313-11052	NA	NA	NA
IRIS_313-11053	NA	NA	NA
IRIS_313-11054	1	C/T	NA
IRIS_313-11055	NA	T/T	NA
IRIS_313-11056	NA	C/T	NA
IRIS_313-11057	1	NA	NA
IRIS_313-11058	NA	T/T	NA
IRIS_313-11059	NA	NA	NA
IRIS_313-11060	NA	T/T	NA
IRIS_313-11061	NA	T/T	NA
IRIS_313-11062	NA	C/T	NA
IRIS_313-11063	NA	C/C	NA
IRIS_313-11064	NA	NA	NA
IRIS_313-11065	NA	C/C	NA
IRIS_313-11066	NA	T/T	NA
IRIS_313-11067	NA	NA	NA
IRIS_313-11068	0	NA	NA
IRIS_313-11069	NA	T/T	NA
IRIS_313-11070	NA	T/T	NA
IRIS_313-11071	NA	C/C	NA
IRIS_313-11072	NA	T/T	NA
IRIS_313-11073	NA	NA	NA
IRIS_313-11074	NA	C/C	NA
IRIS_313-11075	0	C/C	NA
IRIS_313-11076	0	T/T	1
IRIS_313-11077	NA	C/C	NA
IRIS_313-11078	NA	T/T	NA
IRIS_313-11079	NA	C/C	NA
IRIS_313-11080	NA	T/T	NA
IRIS_313-11081	NA	T/T	NA
IRIS_313-11082	NA	T/T	NA
IRIS_313-11083	NA	C/C	NA
IRIS_313-11084	NA	C/C	NA
IRIS_313-11085	NA	C/C	NA
IRIS_313-11086	NA	T/T	NA
IRIS_313-11087	NA	C/T	NA
IRIS_313-11088	NA	T/T	NA
IRIS_313-11089	NA	C/C	NA
IRIS_313-11090	NA	C/T	NA
IRIS_313-11091	NA	T/T	NA
IRIS_313-11092	NA	C/T	NA
IRIS_313-11093	NA	C/C	NA
IRIS_313-11094	0	C/C	NA
IRIS_313-11095	NA	C/T	NA
IRIS_313-11096	NA	T/T	NA
IRIS_313-11097	NA	C/C	NA
IRIS_313-11098	NA	C/C	NA
IRIS_313-11099	NA	C/C	NA
IRIS_313-11100	NA	C/C	NA
IRIS_313-11101	NA	C/C	NA
IRIS_313-11102	NA	C/C	NA
IRIS_313-11103	NA	C/C	NA
IRIS_313-11104	0	C/C	NA
IRIS_313-11105	NA	C/C	NA
IRIS_313-11106	NA	C/C	NA
IRIS_313-11107	0	C/C	NA
IRIS_313-11108	NA	T/T	NA
IRIS_313-11109	NA	C/C	NA
IRIS_313-11110	0	NA	NA
IRIS_313-11111	NA	C/C	NA
IRIS_313-11112	NA	NA	NA
IRIS_313-11113	1	C/C	NA
IRIS_313-11114	0	NA	NA
IRIS_313-11115	NA	C/C	NA
IRIS_313-11116	NA	C/C	NA
IRIS_313-11117	NA	C/C	NA
IRIS_313-11118	NA	C/C	NA
IRIS_313-11119	NA	C/C	NA
IRIS_313-11120	NA	C/C	NA
IRIS_313-11121	NA	NA	NA
IRIS_313-11122	NA	T/T	NA
IRIS_313-11123	1	C/C	NA
IRIS_313-11124	1	C/C	NA
IRIS_313-11125	NA	C/C	NA
IRIS_313-11126	NA	NA	NA
IRIS_313-11127	0	C/C	NA
IRIS_313-11128	NA	C/T	NA
IRIS_313-11129	NA	NA	NA
IRIS_313-11130	NA	C/T	NA
IRIS_313-11131	NA	C/C	NA
IRIS_313-11132	NA	C/T	NA
IRIS_313-11133	NA	T/T	NA
IRIS_313-11134	NA	C/C	NA
IRIS_313-11135	NA	C/C	NA
IRIS_313-11136	NA	C/C	NA
IRIS_313-11137	NA	NA	NA
IRIS_313-11138	NA	C/C	NA
IRIS_313-11139	NA	C/C	NA
IRIS_313-11140	NA	C/C	NA
IRIS_313-11141	NA	C/C	NA
IRIS_313-11142	NA	C/C	NA
IRIS_313-11143	NA	C/C	NA
IRIS_313-11144	NA	C/C	NA
IRIS_313-11145	NA	C/C	NA
IRIS_313-11146	NA	C/C	NA
IRIS_313-11147	NA	C/C	NA
IRIS_313-11148	1	C/C	NA
IRIS_313-11149	1	C/C	NA
IRIS_313-11150	NA	C/C	NA
IRIS_313-11151	NA	NA	NA
IRIS_313-11152	NA	C/C	NA
IRIS_313-11153	NA	C/C	NA
IRIS_313-11154	NA	T/T	NA
IRIS_313-11155	NA	C/C	NA
IRIS_313-11156	1	C/C	NA
IRIS_313-11157	NA	NA	NA
IRIS_313-11158	NA	NA	NA
IRIS_313-11159	NA	C/C	NA
IRIS_313-11160	NA	C/C	NA
IRIS_313-11161	NA	C/C	NA
IRIS_313-11162	0	T/T	1
IRIS_313-11163	1	C/C	NA
IRIS_313-11164	NA	C/C	NA
IRIS_313-11165	NA	T/T	NA
IRIS_313-11166	NA	NA	NA
IRIS_313-11167	NA	C/C	NA
IRIS_313-11168	NA	C/C	NA
IRIS_313-11169	NA	NA	NA
IRIS_313-11170	NA	C/C	NA
IRIS_313-11171	1	C/C	NA
IRIS_313-11172	NA	T/T	NA
IRIS_313-11173	NA	C/C	NA
IRIS_313-11174	0	T/T	1
IRIS_313-11175	NA	T/T	NA
IRIS_313-11176	NA	C/T	NA
IRIS_313-11177	NA	NA	NA
IRIS_313-11178	NA	NA	NA
IRIS_313-11179	NA	T/T	NA
IRIS_313-11180	NA	C/C	NA
IRIS_313-11181	NA	C/C	NA
IRIS_313-11182	NA	C/C	NA
IRIS_313-11183	NA	C/C	NA
IRIS_313-11189	NA	C/C	NA
IRIS_313-11191	1	C/C	NA
IRIS_313-11192	NA	T/T	NA
IRIS_313-11193	NA	C/C	NA
IRIS_313-11194	NA	NA	NA
IRIS_313-11195	0	C/C	NA
IRIS_313-11196	NA	NA	NA
IRIS_313-11197	NA	C/C	NA
IRIS_313-11198	NA	NA	NA
IRIS_313-11199	NA	C/C	NA
IRIS_313-11200	0	T/T	1
IRIS_313-11201	NA	C/C	NA
IRIS_313-11202	NA	C/C	NA
IRIS_313-11203	NA	C/C	NA
IRIS_313-11204	NA	C/C	NA
IRIS_313-11205	1	C/C	NA
IRIS_313-11206	NA	C/C	NA
IRIS_313-11207	0	NA	NA
IRIS_313-11208	NA	C/C	NA
IRIS_313-11209	NA	C/C	NA
IRIS_313-11210	NA	NA	NA
IRIS_313-11211	NA	C/C	NA
IRIS_313-11212	0	NA	NA
IRIS_313-11213	NA	T/T	NA
IRIS_313-11214	NA	T/T	NA
IRIS_313-11216	0	NA	NA
IRIS_313-11217	NA	C/C	NA
IRIS_313-11218	0	NA	NA
IRIS_313-11219	NA	C/C	NA
IRIS_313-11220	NA	C/C	NA
IRIS_313-11221	NA	C/C	NA
IRIS_313-11222	NA	C/C	NA
IRIS_313-11223	NA	C/C	NA
IRIS_313-11224	NA	T/T	NA
IRIS_313-11225	0	C/C	NA
IRIS_313-11226	NA	C/C	NA
IRIS_313-11227	NA	C/C	NA
IRIS_313-11228	NA	T/T	NA
IRIS_313-11229	NA	C/C	NA
IRIS_313-11230	NA	C/C	NA
IRIS_313-11231	NA	C/C	NA
IRIS_313-11232	NA	C/C	NA
IRIS_313-11233	NA	T/T	NA
IRIS_313-11234	NA	C/C	NA
IRIS_313-11235	NA	C/C	NA
IRIS_313-11236	NA	NA	NA
IRIS_313-11237	0	T/T	1
IRIS_313-11238	NA	C/C	NA
IRIS_313-11239	NA	T/T	NA
IRIS_313-11240	NA	T/T	NA
IRIS_313-11241	NA	C/T	NA
IRIS_313-11242	0	C/C	NA
IRIS_313-11243	NA	C/C	NA
IRIS_313-11244	NA	NA	NA
IRIS_313-11245	NA	NA	NA
IRIS_313-11246	1	C/C	NA
IRIS_313-11247	NA	NA	NA
IRIS_313-11248	1	C/C	NA
IRIS_313-11249	0	C/T	NA
IRIS_313-11250	0	C/C	NA
IRIS_313-11251	0	T/T	1
IRIS_313-11252	NA	C/C	NA
IRIS_313-11253	NA	T/T	NA
IRIS_313-11254	NA	T/T	NA
IRIS_313-11255	NA	C/C	NA
IRIS_313-11256	NA	C/C	NA
IRIS_313-11257	NA	C/C	NA
IRIS_313-11258	NA	T/T	NA
IRIS_313-11259	0	T/T	1
IRIS_313-11260	NA	T/T	NA
IRIS_313-11261	NA	T/T	NA
IRIS_313-11262	NA	C/C	NA
IRIS_313-11263	NA	T/T	NA
IRIS_313-11264	NA	C/T	NA
IRIS_313-11265	NA	NA	NA
IRIS_313-11266	NA	C/C	NA
IRIS_313-11267	1	C/C	NA
IRIS_313-11268	NA	T/T	NA
IRIS_313-11269	NA	T/T	NA
IRIS_313-11270	0	T/T	1
IRIS_313-11271	NA	NA	NA
IRIS_313-11272	NA	T/T	NA
IRIS_313-11273	NA	C/C	NA
IRIS_313-11274	NA	C/T	NA
IRIS_313-11275	NA	C/C	NA
IRIS_313-11276	NA	NA	NA
IRIS_313-11277	NA	C/C	NA
IRIS_313-11278	NA	T/T	NA
IRIS_313-11279	NA	T/T	NA
IRIS_313-11280	NA	C/T	NA
IRIS_313-11281	NA	C/C	NA
IRIS_313-11282	1	C/C	NA
IRIS_313-11283	NA	C/T	NA
IRIS_313-11284	NA	C/C	NA
IRIS_313-11285	NA	C/C	NA
IRIS_313-11286	NA	C/T	NA
IRIS_313-11287	NA	NA	NA
IRIS_313-11288	0	T/T	1
IRIS_313-11289	NA	T/T	NA
IRIS_313-11290	NA	C/T	NA
IRIS_313-11291	NA	NA	NA
IRIS_313-11292	0	NA	NA
IRIS_313-11293	1	T/T	0
IRIS_313-11294	NA	C/C	NA
IRIS_313-11295	NA	NA	NA
IRIS_313-11296	NA	T/T	NA
IRIS_313-11297	NA	C/C	NA
IRIS_313-11298	NA	C/C	NA
IRIS_313-11299	NA	C/C	NA
IRIS_313-11300	NA	C/C	NA
IRIS_313-11301	NA	T/T	NA
IRIS_313-11302	NA	T/T	NA
IRIS_313-11303	NA	T/T	NA
IRIS_313-11304	NA	C/C	NA
IRIS_313-11305	NA	C/C	NA
IRIS_313-11306	NA	C/C	NA
IRIS_313-11307	NA	T/T	NA
IRIS_313-11308	NA	C/C	NA
IRIS_313-11309	NA	C/C	NA
IRIS_313-11310	NA	NA	NA
IRIS_313-11311	NA	C/C	NA
IRIS_313-11312	NA	T/T	NA
IRIS_313-11313	NA	C/C	NA
IRIS_313-11314	NA	C/C	NA
IRIS_313-11315	NA	T/T	NA
IRIS_313-11316	NA	NA	NA
IRIS_313-11317	NA	T/T	NA
IRIS_313-11318	NA	NA	NA
IRIS_313-11319	NA	C/C	NA
IRIS_313-11320	NA	C/C	NA
IRIS_313-11321	NA	T/T	NA
IRIS_313-11322	NA	T/T	NA
IRIS_313-11323	NA	NA	NA
IRIS_313-11324	0	T/T	1
IRIS_313-11325	NA	NA	NA
IRIS_313-11326	NA	T/T	NA
IRIS_313-11327	NA	T/T	NA
IRIS_313-11328	NA	C/C	NA
IRIS_313-11329	0	C/C	NA
IRIS_313-11330	NA	T/T	NA
IRIS_313-11331	NA	T/T	NA
IRIS_313-11334	NA	T/T	NA
IRIS_313-11335	NA	C/C	NA
IRIS_313-11336	0	NA	NA
IRIS_313-11337	NA	C/C	NA
IRIS_313-11338	NA	T/T	NA
IRIS_313-11339	NA	C/C	NA
IRIS_313-11340	NA	C/C	NA
IRIS_313-11341	NA	T/T	NA
IRIS_313-11342	NA	NA	NA
IRIS_313-11343	NA	NA	NA
IRIS_313-11344	0	T/T	1
IRIS_313-11345	NA	C/C	NA
IRIS_313-11346	1	C/C	NA
IRIS_313-11347	NA	C/C	NA
IRIS_313-11348	1	NA	NA
IRIS_313-11349	1	NA	NA
IRIS_313-11350	NA	NA	NA
IRIS_313-11351	1	C/C	NA
IRIS_313-11352	1	NA	NA
IRIS_313-11353	NA	NA	NA
IRIS_313-11354	1	C/C	NA
IRIS_313-11355	0	C/T	NA
IRIS_313-11356	NA	T/T	NA
IRIS_313-11357	NA	T/T	NA
IRIS_313-11358	NA	C/C	NA
IRIS_313-11359	NA	C/C	NA
IRIS_313-11360	0	C/C	NA
IRIS_313-11361	NA	C/C	NA
IRIS_313-11362	NA	T/T	NA
IRIS_313-11363	1	C/C	NA
IRIS_313-11364	NA	C/C	NA
IRIS_313-11365	NA	C/C	NA
IRIS_313-11367	NA	C/C	NA
IRIS_313-11368	1	C/C	NA
IRIS_313-11369	NA	T/T	NA
IRIS_313-11370	NA	NA	NA
IRIS_313-11371	NA	T/T	NA
IRIS_313-11372	NA	C/C	NA
IRIS_313-11373	NA	T/T	NA
IRIS_313-11374	NA	T/T	NA
IRIS_313-11375	NA	NA	NA
IRIS_313-11376	NA	C/C	NA
IRIS_313-11377	NA	C/C	NA
IRIS_313-11379	NA	C/C	NA
IRIS_313-11380	NA	C/C	NA
IRIS_313-11381	NA	C/C	NA
IRIS_313-11382	NA	C/T	NA
IRIS_313-11383	NA	NA	NA
IRIS_313-11384	NA	C/C	NA
IRIS_313-11385	NA	NA	NA
IRIS_313-11386	NA	T/T	NA
IRIS_313-11387	NA	T/T	NA
IRIS_313-11388	NA	T/T	NA
IRIS_313-11389	NA	C/T	NA
IRIS_313-11390	NA	T/T	NA
IRIS_313-11391	NA	C/C	NA
IRIS_313-11392	NA	C/C	NA
IRIS_313-11393	NA	T/T	NA
IRIS_313-11394	NA	T/T	NA
IRIS_313-11395	NA	C/C	NA
IRIS_313-11396	NA	C/C	NA
IRIS_313-11397	NA	C/C	NA
IRIS_313-11398	NA	T/T	NA
IRIS_313-11399	NA	NA	NA
IRIS_313-11400	NA	C/C	NA
IRIS_313-11401	NA	C/C	NA
IRIS_313-11402	NA	T/T	NA
IRIS_313-11403	NA	T/T	NA
IRIS_313-11404	NA	C/C	NA
IRIS_313-11405	NA	C/C	NA
IRIS_313-11406	NA	C/C	NA
IRIS_313-11407	0	T/T	1
IRIS_313-11408	NA	NA	NA
IRIS_313-11409	NA	C/C	NA
IRIS_313-11410	NA	T/T	NA
IRIS_313-11411	NA	C/C	NA
IRIS_313-11413	0	C/C	NA
IRIS_313-11414	NA	T/T	NA
IRIS_313-11415	NA	T/T	NA
IRIS_313-11416	NA	C/T	NA
IRIS_313-11417	NA	T/T	NA
IRIS_313-11418	NA	T/T	NA
IRIS_313-11419	NA	NA	NA
IRIS_313-11420	NA	T/T	NA
IRIS_313-11421	NA	C/C	NA
IRIS_313-11422	NA	C/C	NA
IRIS_313-11423	NA	T/T	NA
IRIS_313-11424	NA	C/C	NA
IRIS_313-11425	NA	C/C	NA
IRIS_313-11426	0	C/C	NA
IRIS_313-11427	0	C/C	NA
IRIS_313-11428	0	C/C	NA
IRIS_313-11429	NA	C/C	NA
IRIS_313-11431	NA	T/T	NA
IRIS_313-11432	1	C/C	NA
IRIS_313-11433	NA	C/C	NA
IRIS_313-11434	0	C/C	NA
IRIS_313-11435	NA	C/C	NA
IRIS_313-11436	0	C/C	NA
IRIS_313-11437	NA	C/C	NA
IRIS_313-11438	0	T/T	1
IRIS_313-11439	NA	C/C	NA
IRIS_313-11441	NA	C/C	NA
IRIS_313-11442	NA	C/C	NA
IRIS_313-11443	NA	T/T	NA
IRIS_313-11445	NA	C/C	NA
IRIS_313-11446	NA	C/C	NA
IRIS_313-11447	NA	C/C	NA
IRIS_313-11448	1	C/C	NA
IRIS_313-11449	NA	C/C	NA
IRIS_313-11451	NA	T/T	NA
IRIS_313-11452	NA	T/T	NA
IRIS_313-11453	NA	C/C	NA
IRIS_313-11454	NA	T/T	NA
IRIS_313-11455	NA	C/C	NA
IRIS_313-11456	1	C/C	NA
IRIS_313-11458	NA	C/C	NA
IRIS_313-11460	NA	C/C	NA
IRIS_313-11461	NA	C/C	NA
IRIS_313-11462	1	C/C	NA
IRIS_313-11463	NA	C/C	NA
IRIS_313-11464	NA	C/C	NA
IRIS_313-11465	NA	C/C	NA
IRIS_313-11467	NA	T/T	NA
IRIS_313-11471	NA	T/T	NA
IRIS_313-11472	NA	T/T	NA
IRIS_313-11473	NA	C/C	NA
IRIS_313-11476	NA	T/T	NA
IRIS_313-11477	NA	C/C	NA
IRIS_313-11478	NA	NA	NA
IRIS_313-11479	1	C/C	NA
IRIS_313-11480	NA	T/T	NA
IRIS_313-11481	NA	NA	NA
IRIS_313-11482	0	C/C	NA
IRIS_313-11483	NA	T/T	NA
IRIS_313-11484	NA	C/C	NA
IRIS_313-11485	NA	T/T	NA
IRIS_313-11486	NA	C/C	NA
IRIS_313-11487	NA	C/C	NA
IRIS_313-11489	0	T/T	1
IRIS_313-11490	NA	NA	NA
IRIS_313-11491	NA	NA	NA
IRIS_313-11492	NA	T/T	NA
IRIS_313-11493	NA	T/T	NA
IRIS_313-11494	1	C/C	NA
IRIS_313-11495	NA	C/C	NA
IRIS_313-11496	NA	C/C	NA
IRIS_313-11497	NA	C/C	NA
IRIS_313-11498	NA	C/C	NA
IRIS_313-11499	NA	C/C	NA
IRIS_313-11500	NA	C/C	NA
IRIS_313-11505	NA	C/C	NA
IRIS_313-11506	NA	NA	NA
IRIS_313-11507	NA	C/C	NA
IRIS_313-11508	NA	C/C	NA
IRIS_313-11509	NA	C/C	NA
IRIS_313-11510	0	T/T	1
IRIS_313-11511	NA	C/C	NA
IRIS_313-11512	NA	C/C	NA
IRIS_313-11513	NA	T/T	NA
IRIS_313-11515	NA	T/T	NA
IRIS_313-11516	NA	C/C	NA
IRIS_313-11517	NA	NA	NA
IRIS_313-11521	NA	T/T	NA
IRIS_313-11522	NA	NA	NA
IRIS_313-11523	NA	C/C	NA
IRIS_313-11524	0	C/C	NA
IRIS_313-11525	NA	C/C	NA
IRIS_313-11526	0	C/C	NA
IRIS_313-11527	NA	C/C	NA
IRIS_313-11528	NA	C/C	NA
IRIS_313-11530	NA	C/C	NA
IRIS_313-11532	0	NA	NA
IRIS_313-11534	NA	C/C	NA
IRIS_313-11535	NA	T/T	NA
IRIS_313-11536	1	C/C	NA
IRIS_313-11537	0	C/C	NA
IRIS_313-11538	0	T/T	1
IRIS_313-11539	NA	C/C	NA
IRIS_313-11540	0	C/C	NA
IRIS_313-11541	NA	C/C	NA
IRIS_313-11542	1	C/C	NA
IRIS_313-11543	NA	C/C	NA
IRIS_313-11544	NA	NA	NA
IRIS_313-11545	NA	C/C	NA
IRIS_313-11546	NA	C/C	NA
IRIS_313-11547	NA	C/C	NA
IRIS_313-11548	NA	T/T	NA
IRIS_313-11549	NA	T/T	NA
IRIS_313-11551	NA	NA	NA
IRIS_313-11554	NA	C/T	NA
IRIS_313-11555	NA	T/T	NA
IRIS_313-11556	NA	T/T	NA
IRIS_313-11557	NA	C/C	NA
IRIS_313-11558	NA	T/T	NA
IRIS_313-11561	NA	C/C	NA
IRIS_313-11563	NA	C/C	NA
IRIS_313-11564	NA	C/C	NA
IRIS_313-11565	1	C/C	NA
IRIS_313-11566	NA	C/C	NA
IRIS_313-11567	NA	C/C	NA
IRIS_313-11568	1	C/T	NA
IRIS_313-11570	NA	C/C	NA
IRIS_313-11571	NA	C/C	NA
IRIS_313-11572	0	C/C	NA
IRIS_313-11573	NA	C/C	NA
IRIS_313-11574	1	C/C	NA
IRIS_313-11575	1	NA	NA
IRIS_313-11576	NA	C/C	NA
IRIS_313-11577	1	C/C	NA
IRIS_313-11578	NA	C/C	NA
IRIS_313-11579	NA	C/C	NA
IRIS_313-11580	NA	C/C	NA
IRIS_313-11582	1	NA	NA
IRIS_313-11584	1	C/C	NA
IRIS_313-11585	NA	C/C	NA
IRIS_313-11586	NA	C/C	NA
IRIS_313-11588	NA	T/T	NA
IRIS_313-11591	NA	C/C	NA
IRIS_313-11594	NA	C/T	NA
IRIS_313-11595	0	T/T	1
IRIS_313-11596	NA	NA	NA
IRIS_313-11597	1	C/C	NA
IRIS_313-11598	NA	C/T	NA
IRIS_313-11599	NA	C/C	NA
IRIS_313-11600	1	C/C	NA
IRIS_313-11602	NA	C/C	NA
IRIS_313-11603	NA	T/T	NA
IRIS_313-11604	NA	C/C	NA
IRIS_313-11606	0	C/C	NA
IRIS_313-11607	NA	C/C	NA
IRIS_313-11608	NA	T/T	NA
IRIS_313-11609	NA	T/T	NA
IRIS_313-11610	NA	NA	NA
IRIS_313-11611	NA	C/C	NA
IRIS_313-11615	NA	C/C	NA
IRIS_313-11616	1	NA	NA
IRIS_313-11617	NA	T/T	NA
IRIS_313-11618	1	T/T	0
IRIS_313-11619	NA	C/C	NA
IRIS_313-11620	NA	T/T	NA
IRIS_313-11621	NA	NA	NA
IRIS_313-11622	NA	C/C	NA
IRIS_313-11623	NA	C/C	NA
IRIS_313-11624	NA	NA	NA
IRIS_313-11625	NA	T/T	NA
IRIS_313-11626	1	C/C	NA
IRIS_313-11627	NA	T/T	NA
IRIS_313-11628	NA	C/T	NA
IRIS_313-11629	1	C/T	NA
IRIS_313-11630	NA	T/T	NA
IRIS_313-11632	NA	T/T	NA
IRIS_313-11635	NA	C/C	NA
IRIS_313-11636	NA	T/T	NA
IRIS_313-11638	NA	C/C	NA
IRIS_313-11639	NA	C/T	NA
IRIS_313-11640	NA	NA	NA
IRIS_313-11641	NA	C/C	NA
IRIS_313-11642	NA	C/C	NA
IRIS_313-11643	NA	T/T	NA
IRIS_313-11644	1	NA	NA
IRIS_313-11645	NA	C/T	NA
IRIS_313-11646	NA	T/T	NA
IRIS_313-11647	NA	T/T	NA
IRIS_313-11648	NA	C/T	NA
IRIS_313-11650	NA	C/C	NA
IRIS_313-11651	NA	C/C	NA
IRIS_313-11652	1	C/C	NA
IRIS_313-11653	1	C/C	NA
IRIS_313-11654	NA	C/C	NA
IRIS_313-11655	NA	NA	NA
IRIS_313-11656	NA	T/T	NA
IRIS_313-11657	NA	T/T	NA
IRIS_313-11658	NA	C/C	NA
IRIS_313-11659	0	C/C	NA
IRIS_313-11660	NA	C/C	NA
IRIS_313-11661	NA	C/C	NA
IRIS_313-11663	NA	C/C	NA
IRIS_313-11664	NA	T/T	NA
IRIS_313-11665	1	C/C	NA
IRIS_313-11666	NA	C/T	NA
IRIS_313-11667	NA	C/C	NA
IRIS_313-11668	NA	T/T	NA
IRIS_313-11669	NA	C/C	NA
IRIS_313-11671	NA	C/C	NA
IRIS_313-11672	NA	C/C	NA
IRIS_313-11673	NA	C/C	NA
IRIS_313-11674	NA	NA	NA
IRIS_313-11676	NA	T/T	NA
IRIS_313-11677	NA	T/T	NA
IRIS_313-11678	NA	T/T	NA
IRIS_313-11679	NA	C/C	NA
IRIS_313-11680	NA	C/C	NA
IRIS_313-11681	NA	T/T	NA
IRIS_313-11682	NA	T/T	NA
IRIS_313-11683	NA	C/C	NA
IRIS_313-11684	1	NA	NA
IRIS_313-11685	NA	C/C	NA
IRIS_313-11686	NA	T/T	NA
IRIS_313-11687	NA	C/T	NA
IRIS_313-11688	NA	C/T	NA
IRIS_313-11689	NA	C/C	NA
IRIS_313-11690	1	C/C	NA
IRIS_313-11691	0	C/C	NA
IRIS_313-11692	NA	C/C	NA
IRIS_313-11693	NA	NA	NA
IRIS_313-11694	NA	NA	NA
IRIS_313-11695	NA	NA	NA
IRIS_313-11698	1	NA	NA
IRIS_313-11700	NA	C/C	NA
IRIS_313-11702	0	C/C	NA
IRIS_313-11704	NA	T/T	NA
IRIS_313-11705	NA	T/T	NA
IRIS_313-11706	NA	T/T	NA
IRIS_313-11707	NA	C/C	NA
IRIS_313-11708	NA	C/C	NA
IRIS_313-11709	NA	C/C	NA
IRIS_313-11710	NA	C/T	NA
IRIS_313-11711	NA	T/T	NA
IRIS_313-11712	NA	T/T	NA
IRIS_313-11713	0	C/C	NA
IRIS_313-11714	0	C/C	NA
IRIS_313-11716	0	T/T	1
IRIS_313-11717	0	T/T	1
IRIS_313-11719	NA	T/T	NA
IRIS_313-11720	NA	C/C	NA
IRIS_313-11721	NA	T/T	NA
IRIS_313-11722	NA	NA	NA
IRIS_313-11723	NA	T/T	NA
IRIS_313-11724	1	C/C	NA
IRIS_313-11725	NA	C/C	NA
IRIS_313-11726	NA	NA	NA
IRIS_313-11727	NA	C/T	NA
IRIS_313-11728	NA	NA	NA
IRIS_313-11729	NA	C/C	NA
IRIS_313-11730	NA	T/T	NA
IRIS_313-11731	NA	C/C	NA
IRIS_313-11732	NA	C/T	NA
IRIS_313-11733	NA	NA	NA
IRIS_313-11734	1	C/C	NA
IRIS_313-11735	NA	C/C	NA
IRIS_313-11736	NA	C/C	NA
IRIS_313-11737	NA	T/T	NA
IRIS_313-11738	1	NA	NA
IRIS_313-11739	0	C/C	NA
IRIS_313-11740	NA	C/C	NA
IRIS_313-11741	NA	C/C	NA
IRIS_313-11742	NA	C/C	NA
IRIS_313-11743	0	T/T	1
IRIS_313-11744	1	NA	NA
IRIS_313-11745	1	C/C	NA
IRIS_313-11746	1	C/C	NA
IRIS_313-11747	NA	C/T	NA
IRIS_313-11748	NA	NA	NA
IRIS_313-11750	NA	C/C	NA
IRIS_313-11751	NA	T/T	NA
IRIS_313-11752	NA	C/C	NA
IRIS_313-11753	NA	C/C	NA
IRIS_313-11754	NA	C/C	NA
IRIS_313-11755	NA	C/C	NA
IRIS_313-11756	NA	C/C	NA
IRIS_313-11757	NA	T/T	NA
IRIS_313-11758	NA	C/C	NA
IRIS_313-11759	NA	C/C	NA
IRIS_313-11760	NA	C/C	NA
IRIS_313-11761	NA	C/C	NA
IRIS_313-11762	NA	C/C	NA
IRIS_313-11763	0	T/T	1
IRIS_313-11764	NA	C/C	NA
IRIS_313-11765	NA	T/T	NA
IRIS_313-11766	NA	T/T	NA
IRIS_313-11767	NA	C/C	NA
IRIS_313-11772	NA	C/C	NA
IRIS_313-11773	0	NA	NA
IRIS_313-11779	1	NA	NA
IRIS_313-11780	0	T/T	1
IRIS_313-11782	NA	C/C	NA
IRIS_313-11783	1	C/C	NA
IRIS_313-11784	1	C/C	NA
IRIS_313-11785	0	T/T	1
IRIS_313-11786	0	C/C	NA
IRIS_313-11787	0	T/T	1
IRIS_313-11788	NA	C/C	NA
IRIS_313-11789	NA	C/C	NA
IRIS_313-11790	NA	C/C	NA
IRIS_313-11791	NA	NA	NA
IRIS_313-11792	NA	C/C	NA
IRIS_313-11793	NA	C/T	NA
IRIS_313-11794	NA	C/C	NA
IRIS_313-11795	NA	C/T	NA
IRIS_313-11796	NA	C/C	NA
IRIS_313-11797	0	T/T	1
IRIS_313-11798	NA	C/T	NA
IRIS_313-11799	1	NA	NA
IRIS_313-11800	NA	C/C	NA
IRIS_313-11801	NA	T/T	NA
IRIS_313-11802	1	C/C	NA
IRIS_313-11803	1	C/C	NA
IRIS_313-11804	NA	C/T	NA
IRIS_313-11805	1	C/C	NA
IRIS_313-11806	1	C/C	NA
IRIS_313-11807	1	C/C	NA
IRIS_313-11808	0	C/C	NA
IRIS_313-11809	0	T/T	1
IRIS_313-11810	NA	C/T	NA
IRIS_313-11811	NA	C/T	NA
IRIS_313-11812	1	NA	NA
IRIS_313-11813	NA	C/C	NA
IRIS_313-11814	1	C/T	NA
IRIS_313-11815	NA	NA	NA
IRIS_313-11816	NA	C/C	NA
IRIS_313-11817	NA	C/C	NA
IRIS_313-11818	0	NA	NA
IRIS_313-11819	NA	T/T	NA
IRIS_313-11820	0	T/T	1
IRIS_313-11821	NA	C/T	NA
IRIS_313-11822	0	C/C	NA
IRIS_313-11823	NA	C/C	NA
IRIS_313-11824	NA	C/C	NA
IRIS_313-11825	NA	C/C	NA
IRIS_313-11826	NA	C/C	NA
IRIS_313-11827	NA	C/C	NA
IRIS_313-11828	NA	NA	NA
IRIS_313-11829	NA	C/C	NA
IRIS_313-11830	NA	C/C	NA
IRIS_313-11831	NA	C/C	NA
IRIS_313-11832	0	C/C	NA
IRIS_313-11833	NA	T/T	NA
IRIS_313-11834	NA	C/C	NA
IRIS_313-11835	NA	C/C	NA
IRIS_313-11836	NA	C/C	NA
IRIS_313-11837	NA	T/T	NA
IRIS_313-11838	1	NA	NA
IRIS_313-11839	NA	T/T	NA
IRIS_313-11840	NA	T/T	NA
IRIS_313-11841	NA	T/T	NA
IRIS_313-11842	NA	T/T	NA
IRIS_313-11843	NA	T/T	NA
IRIS_313-11844	NA	C/C	NA
IRIS_313-11845	NA	C/C	NA
IRIS_313-11846	NA	C/C	NA
IRIS_313-11848	NA	C/C	NA
IRIS_313-11849	NA	T/T	NA
IRIS_313-11850	NA	C/C	NA
IRIS_313-11851	NA	C/C	NA
IRIS_313-11852	NA	C/C	NA
IRIS_313-11853	NA	NA	NA
IRIS_313-11854	NA	C/T	NA
IRIS_313-11855	NA	NA	NA
IRIS_313-11856	NA	NA	NA
IRIS_313-11857	NA	C/C	NA
IRIS_313-11858	NA	NA	NA
IRIS_313-11859	NA	C/C	NA
IRIS_313-11860	NA	NA	NA
IRIS_313-11861	NA	NA	NA
IRIS_313-11862	1	C/C	NA
IRIS_313-11863	NA	C/C	NA
IRIS_313-11865	NA	C/C	NA
IRIS_313-11866	NA	C/C	NA
IRIS_313-11867	NA	C/T	NA
IRIS_313-11868	NA	C/C	NA
IRIS_313-11869	1	C/C	NA
IRIS_313-11870	NA	NA	NA
IRIS_313-11871	NA	NA	NA
IRIS_313-11872	NA	NA	NA
IRIS_313-11875	NA	C/C	NA
IRIS_313-11876	1	NA	NA
IRIS_313-11877	1	NA	NA
IRIS_313-11878	NA	NA	NA
IRIS_313-11881	NA	C/C	NA
IRIS_313-11882	NA	NA	NA
IRIS_313-11884	NA	C/C	NA
IRIS_313-11885	1	C/C	NA
IRIS_313-11886	NA	C/C	NA
IRIS_313-11887	NA	NA	NA
IRIS_313-11888	NA	T/T	NA
IRIS_313-11889	NA	NA	NA
IRIS_313-11890	NA	C/C	NA
IRIS_313-11892	NA	C/C	NA
IRIS_313-11893	NA	T/T	NA
IRIS_313-11894	NA	C/C	NA
IRIS_313-11895	0	C/C	NA
IRIS_313-11896	NA	T/T	NA
IRIS_313-11897	NA	C/C	NA
IRIS_313-11898	NA	T/T	NA
IRIS_313-11899	0	C/C	NA
IRIS_313-11900	NA	NA	NA
IRIS_313-11901	NA	T/T	NA
IRIS_313-11902	NA	T/T	NA
IRIS_313-11903	NA	C/C	NA
IRIS_313-11904	NA	C/C	NA
IRIS_313-11905	NA	C/T	NA
IRIS_313-11906	NA	C/C	NA
IRIS_313-11907	NA	C/C	NA
IRIS_313-11908	0	NA	NA
IRIS_313-11909	NA	C/T	NA
IRIS_313-11910	NA	C/C	NA
IRIS_313-11911	NA	C/C	NA
IRIS_313-11912	0	T/T	1
IRIS_313-11913	NA	C/C	NA
IRIS_313-11914	NA	T/T	NA
IRIS_313-11915	0	C/C	NA
IRIS_313-11916	NA	C/C	NA
IRIS_313-11917	NA	T/T	NA
IRIS_313-11918	NA	NA	NA
IRIS_313-11919	1	C/C	NA
IRIS_313-11920	NA	C/C	NA
IRIS_313-11921	NA	C/C	NA
IRIS_313-11922	NA	NA	NA
IRIS_313-11923	NA	C/C	NA
[truncated: 1,026 more rows]

## Sheet: Mo15-24
Mo15.24_Clean	Accession	356520465	356520465	JAPONICA NIPPONBARE POSITIONS	ASSAY ID	ACCESSION	SUBPOPULATION	MISMATCH	10806802	Mo15-24 infection score and GWAS association
	Possible association with Pita but:			JAPONICA NIPPONBARE ALLELES					T
[truncated: 3,029 more rows]

## Sheet: Mo15-125
	LOC_Os12g18729
Mo15-125		356543761
ASSAY ID	Mo15.125 Gauss Score	Chr 12 : 10926845
B001	NA	A/A
[truncated: 3,023 more rows]

## Sheet: IK81-25
	LOC_Os12g18729			JAPONICA NIPPONBARE POSITIONS	ASSAY ID	ACCESSION	SUBPOPULATION	MISMATCH	10830098
[truncated: 3,028 more rows]

[truncated: 1 more sheets: M64]
